# Supplementary material for: Human MAF1 targets and represses active RNA polymerase III genes by preventing recruitment rather than inducing long-term transcriptional arrest
Source: HighWire-hosted journal article supplement (doi:10.1101/gr.201400.115), 2016-03-03
Supplement: Supp_Table_S2.xlsx [file Supp_Table_S2.xlsx]

## Sheet: POLR3D ChIP-seq
							FBS												SS												SS+I												SS+R+I
Locus annotation	HUGO nomenclature	Locus position with link in GRCh37/hg19	Chromosome	Gene start	Gene end	Promoter Type	INPUT #1 tag count	INPUT #2 tag count	INPUT #mean tag count	POLR3D #1 tag count	POLR3D #1 % IP scores from multiple matches	POLR3D #1 score log2 IP/Input#mean	POLR3D #2 tag count	POLR3D #2 % IP scores from multiple matches	POLR3D #2 score log2 IP/Input#mean	POLR3D #mean score (cut off = 1.5767) INPUT #mean norm	O (Occupied, > cut off) NO (Not occupied, < cut off)		INPUT #1 tag count	INPUT #2 tag count	INPUT #mean tag count	POLR3D #1 tag count	POLR3D #1 % IP scores from multiple matches	POLR3D #1 score log2 IP/Input#mean	POLR3D #2 tag count	POLR3D #2 % IP scores from multiple matches	POLR3D #2 score log2 IP/Input#mean	POLR3D #mean score (cut off = 1.6677) INPUT #mean norm	O (Occupied, > cut off) NO (Not occupied, < cut off)		INPUT #1 tag count	INPUT #2 tag count	INPUT #mean tag count	POLR3D #1 tag count	POLR3D #1 % IP scores from multiple matches	POLR3D #1 score log2 IP/Input#mean	POLR3D #2 tag count	POLR3D #2 % IP scores from multiple matches	POLR3D #2 score log2 IP/Input#mean	POLR3D #mean score (cut off = 1.5522) INPUT #mean norm	O (Occupied, > cut off) NO (Not occupied, < cut off)		INPUT #1 tag count	INPUT #2 tag count	INPUT #mean tag count	POLR3D #1 tag count	POLR3D #1 % IP scores from multiple matches	POLR3D #1 score log2 IP/Input#mean	POLR3D #2 tag count
chr1_136_Pseudo_???-	TRU-NNN4-1	chr1:7990339-7990408	chr1	7990339	7990408	II	20	43	31.5	37	0	0.123575	32	0	0.0116818	0.0676282	NO		58	46	52	33	0	-0.380272	35	0	-0.335184	-0.357728	NO		29	27	28	34	0	0.142019	35	0	0.164387	0.153203	NO		28	66	47	39	0	-0.158262	42
chr1_135_tRNAAsn_GTT-	TRN-GTT5-1	chr1:16847080-16847153	chr1	16847080	16847153	II	45	75	60	480	0	2.5025	486	0	2.51937	2.51094	O		20	75	47.5	106	0	0.811338	99	0	0.735103	0.773221	NO		54	66	60	225	0	1.5025	156	0	1.04731	1.2749	NO		97	72	84.5	82	0	-0.0318489	71
chr1_134_tRNAAsn_GTT-	TRN-GTT18-1	chr1:16858893-16858966	chr1	16858893	16858966	II	53	37	45	59	27.13	0.246915	53	27.45	0.146221	0.196568	NO		29	57	43	61	30.5	0.31797	52	25.45	0.167727	0.242849	NO		46	54	50	68	24.83	0.292782	54	24.77	0.0703893	0.181586	NO		49	70	59.5	72	25.3	0.18861	50
chr1_133_tRNAGlu_TTC-	TRE-TTC4-1	chr1:16861774-16861845	chr1	16861774	16861845	II	68	80	74	4126	31.38	5.32054	4584	30.85	5.47136	5.39595	O		132	97	114.5	1025	24.47	2.8681	912	28.31	2.70466	2.78638	O		72	75	73.5	2262	30.56	4.4689	2063	26.35	4.33787	4.40339	O		81	106	93.5	702	27.56	2.56733	706
chr1_132_tRNAGly_CCC-	TRG-CCC1-1	chr1:16872434-16872504	chr1	16872434	16872504	II	46	68	57	5911	39.67	6.09355	6882	39.29	6.31194	6.20275	O		50	50	50	1942	32.38	4.62352	1948	38.13	4.6279	4.62571	O		31	56	43.5	3508	35.43	5.58905	3433	42.26	5.55813	5.57359	O		21	40	30.5	1718	37.68	4.85263	1908
chr1_131_Pseudo_CAC-	TRV-CAC11-1	chr1:16874160-16874232	chr1	16874160	16874232	II	36	47	41.5	2371	19.91	5.06955	2521	19.1	5.15698	5.11326	O		32	31	31.5	718	16.33	3.60438	704	21.33	3.57712	3.59075	O		36	39	37.5	1250	22.95	4.24511	1385	20.79	4.38977	4.31744	O		28	44	36	675	20.38	3.41709	625
chr1_130_tRNAGly_CCC-	TRG-CCC4-1	chr1:17004766-17004836	chr1	17004766	17004836	II	45	4	24.5	4773	0	6.46154	5530	0	6.67268	6.56711	O		26	47	36.5	2021	0	4.94683	1926	0	4.87841	4.91262	O		5	41	23	3634	0	6.11128	3783	0	6.16879	6.14004	O		5	36	20.5	1900	0	5.25617	2147
chr1_129_tRNAVal_CAC-	TRV-CAC10-1	chr1:17006501-17006573	chr1	17006501	17006573	II	32	26	29	149	90.08	1.60117	175	86.3	1.79684	1.699	O		15	23	19	51	81.63	0.72514	56	74.86	0.811555	0.768348	NO		26	28	27	105	79.88	1.24393	96	83.56	1.14439	1.19416	NO		30	39	34.5	51	79.66	0.328623	52
chr1_1_Pseudo_CAC+	TRV-CAC13-1	chr1:17052061-17052133	chr1	17052061	17052133	II	47	85	66	91	6.59	0.333901	85	4.87	0.260528	0.297214	NO		37	91	64	69	0	0.0747678	73	1.28	0.131912	0.10334	NO		63	44	53.5	75	6.74	0.330541	68	5.1	0.231006	0.280773	NO		46	62	54	84	3.09	0.440573	73
chr1_2_tRNAGly_CCC+	TRG-CCC5-1	chr1:17053780-17053850	chr1	17053780	17053850	II	47	19	33	3742	0	5.90383	4156	0	6.05408	5.97896	O		55	83	69	1109	0	3.5242	982	0	3.35364	3.43892	O		36	58	47	1836	0	4.59895	1972	0	4.70044	4.64969	O		56	85	70.5	857	0	3.14174	1078
chr1_128_Pseudo_CTG-	TRQ-CTG14-1	chr1:17180900-17180971	chr1	17180900	17180971	II	82	31	56.5	58	77.68	0.0248034	51	81.84	-0.0947782	-0.0349874	NO		35	73	54	47	71.63	-0.125531	48	82.52	-0.106915	-0.116223	NO		52	72	62	45	81.81	-0.294743	47	89.51	-0.256775	-0.275759	NO		69	56	62.5	45	78.91	-0.302563	46
chr1_3_Pseudo_CAC+	TRV-CAC11-2	chr1:17186693-17186765	chr1	17186693	17186765	II	69	86	77.5	2569	21.07	4.59555	2740	19.55	4.68748	4.64151	O		59	35	47	737	18.18	3.3163	816	20.3	3.45773	3.38701	O		46	53	49.5	1298	24.23	4.06216	1349	23.2	4.11652	4.08934	O		27	39	33	730	21.21	3.59258	770
chr1_4_tRNAGly_CCC+	TRG-CCC1-2	chr1:17188416-17188486	chr1	17188416	17188486	II	75	45	60	4434	58.9	5.63227	4929	60.45	5.78398	5.70812	O		78	45	61.5	1228	62.19	3.78122	1279	66.07	3.83855	3.80988	O		75	76	75.5	2146	65.56	4.36636	2356	69.03	4.49928	4.43282	O		47	61	54	1150	64.9	3.81225	1260
chr1_5_tRNAGlu_TTC+	TRE-TTC3-1	chr1:17199078-17199149	chr1	17199078	17199149	II	77	67	72	5163	26.92	5.66993	5975	25.89	5.87952	5.77473	O		76	97	86.5	1413	17.75	3.63067	1028	25.1	3.18294	3.4068	O		127	86	106.5	2773	25.05	4.36	2256	24.71	4.06585	4.21293	O		84	114	99	923	20.97	2.88511	886
chr1_6_tRNAAsn_GTT+	TRN-GTT13-1	chr1:17201958-17202031	chr1	17201958	17202031	II	80	62	71	68	4.05	-0.0435016	81	4.51	0.136204	0.0463514	NO		57	54	55.5	93	3.33	0.524662	70	2.01	0.226004	0.375333	NO		76	98	87	67	8.21	-0.270452	64	6.97	-0.315776	-0.293114	NO		22	72	47	68	5.06	0.347923	69
chr1_7_tRNAAsn_GTT+	TRN-GTT4-1	chr1:17216172-17216245	chr1	17216172	17216245	II	56	41	48.5	202	0	1.56336	218	0	1.65958	1.61147	O		41	98	69.5	80	0	0.144735	50	0	-0.314697	-0.0849807	NO		53	58	55.5	115	0	0.762057	76	0	0.310068	0.536062	NO		61	42	51.5	58	0	0.110703	77
chr1_8_Pseudo_CTT+	TRK-CTT12-1	chr1:39970195-39970267	chr1	39970195	39970267	II	85	54	69.5	93	0.99	0.30589	96	0.36	0.340655	0.323273	NO		101	107	104	101	1.03	-0.0326662	81	0.58	-0.271673	-0.15217	NO		221	135	178	91	1.01	-0.781576	94	3.49	-0.746243	-0.76391	NO		190	73	131.5	78	0	-0.580503	93
chr1_127_tRNALys_CTT-	TRK-CTT7-1	chr1:55423542-55423614	chr1	55423542	55423614	II	6	17	11.5	26	0	0.432315	37	0	0.69105	0.561683	NO		28	21	24.5	20	0	-0.124328	23	0	-0.0402639	-0.082296	NO		29	6	17.5	33	0	0.407424	32	0	0.384341	0.395883	NO		12	20	16	30	0	0.383329	19
chr1_126_tRNACys_GCA-	TRC-GCA7-1	chr1:93981834-93981906	chr1	93981834	93981906	II	38	46	42	569	0	3.05649	581	0	3.0851	3.0708	O		67	24	45.5	157	0	1.30849	182	0	1.48952	1.399	NO		29	23	26	268	0	2.41181	270	0	2.42146	2.41664	O		61	35	48	182	0	1.44252	158
chr1_9_tRNAArg_TCT_I+	TRR-TCT1-1	chr1:94313129-94313213	chr1	94313129	94313213	II	33	29	31	9686	0	7.31541	11190	0	7.52305	7.41923	O		51	32	41.5	5871	0	6.36687	3672	0	5.69422	6.03055	O		63	56	59.5	8379	0	6.5539	7475	0	6.38982	6.47186	O		52	88	70	4102	0	5.36877	4042
chr1_125_Pseudo_???-	TRU-NNN8-1	chr1:108496275-108496345	chr1	108496275	108496345	II	36	16	26	50	0	0.514573	45	0	0.421464	0.468018	NO		18	37	27.5	28	0	0.0124909	29	0	0.037153	0.024822	NO		23	4	13.5	37	0	0.623146	35	0	0.579424	0.601285	NO		8	40	24	52	0	0.602665	44
chr1_124_Pseudo_GTT-	TRN-GTT21-1	chr1:143663558-143663631	chr1	143663558	143663631	II	17	12	14.5	14	56.25	-0.0163018	9	47.36	-0.190331	-0.103317	NO		9	21	15	19	36.84	0.122857	21	42.22	0.180572	0.151714	NO		20	8	14	16	38.88	0.0641303	12	84.61	-0.0671142	-0.00149193	NO		15	15	15	13	33.33	-0.0655883	16
chr1_10_tRNAAsn_GTT+	TRN-GTT16-1	chr1:143690028-143690101	chr1	143690028	143690101	II	24	39	31.5	18	100	-0.357552	15	100	-0.450661	-0.404107	NO		9	31	20	10	100	-0.321928	20	100	0	-0.160964	NO		14	25	19.5	12	100	-0.237039	12	100	-0.237039	-0.237039	NO		8	19	13.5	17	100	0.111645	15
chr1_11_tRNAAsn_GTT+	TRN-GTT11-1	chr1:144301611-144301684	chr1	144301611	144301684	II	19	18	18.5	16	100	-0.0763509	15	100	-0.10806	-0.0922053	NO		38	35	36.5	19	100	-0.440573	19	100	-0.440573	-0.440573	NO		15	7	11	19	100	0.257158	19	100	0.257158	0.257158	NO		12	17	14.5	15	100	0.0161197	14
chr1_123_tRNAAsn_GTT-	TRN-GTT16-2	chr1:144308614-144308687	chr1	144308614	144308687	II	26	32	29	17	100	-0.328054	16	100	-0.359081	-0.343568	NO		17	21	19	14	100	-0.155278	20	100	0.0291463	-0.0630659	NO		20	28	24	22	100	-0.0544478	14	100	-0.295456	-0.174952	NO		25	19	22	23	100	0.0274807	20
chr1_12_tRNAAsn_GTT+	TRN-GTT14-1	chr1:144481840-144481913	chr1	144481840	144481913	II	25	19	22	19	61.9	-0.0857299	23	54.54	0.0274807	-0.0291246	NO		37	43	40	26	68.42	-0.321928	27	55.68	-0.296393	-0.309161	NO		9	27	18	31	52.94	0.345775	28	61.62	0.273018	0.309397	NO		12	22	17	24	50	0.200299	33
chr1_122_tRNAAsn_GTT-	TRN-GTT16-3	chr1:144488843-144488916	chr1	144488843	144488916	II	28	34	31	18	95	-0.345775	22	76.81	-0.230298	-0.288036	NO		17	21	19	14	100	-0.155278	22	87.25	0.0857299	-0.0347742	NO		21	29	25	21	95.62	-0.108934	17	88.34	-0.226771	-0.167853	NO		26	23	24.5	24	92.81	-0.0132968	22
chr1_121_tRNAGln_CTG-	TRQ-CTG8-1	chr1:144839436-144839507	chr1	144839436	144839507	II	123	82	102.5	285	73.44	1.24936	372	68.22	1.6012	1.42528	NO		40	51	45.5	105	71.28	0.838411	98	56.48	0.761595	0.800003	NO		84	61	72.5	213	67.87	1.24533	198	73.38	1.15341	1.19937	NO		52	65	58.5	99	60.86	0.543622	109
chr1_120_tRNAGln_CTG-	TRQ-CTG8-2	chr1:145379320-145379391	chr1	145379320	145379391	II	118	86	102	562	46.06	2.16506	682	45.57	2.43134	2.2982	O		94	46	70	149	58.83	0.83996	140	47.38	0.765535	0.802747	NO		97	80	88.5	371	49.6	1.75872	388	47.26	1.81862	1.78867	O		94	67	80.5	137	57.09	0.595802	158
chr1_13_tRNAAsn_GTT+	TRN-GTT20-1	chr1:145385729-145385804	chr1	145385729	145385804	II	39	30	34.5	35	0	0.0111406	43	0	0.178597	0.0948689	NO		21	33	27	30	0	0.0740006	27	0	0	0.0370003	NO		12	36	24	33	0	0.222392	25	0	0.0264722	0.124432	NO		39	31	35	26	0	-0.215013	22
chr1_119_tRNALys_CTT-	TRK-CTT2-1	chr1:145395522-145395594	chr1	145395522	145395594	II	51	40	45.5	10529	0	7.12778	12342	0	7.35639	7.24208	O		53	61	57	6431	0	6.2146	6229	0	6.16877	6.19169	O		42	63	52.5	9127	0	6.79434	9895	0	6.91053	6.85243	O		52	62	57	5064	0	5.87164	5523
chr1_118_tRNAHis_GTG-	TRH-GTG1-1	chr1:145396881-145396952	chr1	145396881	145396952	II	45	51	48	10650	0	7.09722	14065	0	7.49749	7.29736	O		51	87	69	7201	0	6.19062	6764	0	6.10069	6.14566	O		75	55	65	10151	0	6.74374	12182	0	7.00616	6.87495	O		70	106	88	4839	0	5.36677	5918
chr1_117_tRNAGly_TCC-	TRG-TCC2-1	chr1:145397864-145397935	chr1	145397864	145397935	II	58	27	42.5	7910	0	6.77501	8473	0	6.87385	6.82443	O		36	15	25.5	4704	0	6.41443	4188	0	6.24793	6.33118	O		8	37	22.5	6663	0	6.99419	6806	0	7.02469	7.00944	O		22	42	32	3904	0	5.98758	4423
chr1_116_tRNAGlu_CTC-	TRE-CTC1-1	chr1:145399233-145399304	chr1	145399233	145399304	II	19	60	39.5	11895	0	7.42276	13959	0	7.65306	7.53791	O		64	60	62	8889	0	6.5991	7887	0	6.42718	6.51314	O		39	94	66.5	11873	0	6.94658	11671	0	6.92189	6.93423	O		92	64	78	7775	0	6.1753	8339
chr1_14_Pseudo_CCT+	TRR-CCT6-1	chr1:145941579-145941649	chr1	145941579	145941649	II	39	30	34.5	15	100	-0.519374	16	100	-0.487665	-0.50352	NO		31	7	19	13	100	-0.188445	16	100	-0.0911479	-0.139796	NO		3	29	16	13	100	-0.0972972	14	100	-0.0641303	-0.0807138	NO		27	25	26	24	100	-0.0524674	20
chr1_15_tRNAGln_CTG+	TRQ-CTG3-1	chr1:145963304-145963375	chr1	145963304	145963375	II	102	89	95.5	5433	100	5.44393	6553	100	5.71299	5.57846	O		88	101	94.5	1325	100	3.44408	1281	100	3.39645	3.42026	O		91	104	97.5	3289	100	4.70218	3361	100	4.73314	4.71766	O		55	76	65.5	1201	100	3.68819	1191
chr1_115_tRNAAsn_GTT-	TRN-GTT9-1	chr1:145979034-145979107	chr1	145979034	145979107	II	30	63	46.5	153	100	1.25831	160	100	1.31247	1.28539	NO		32	53	42.5	56	100	0.246356	50	100	0.142019	0.194187	NO		32	60	46	65	100	0.321928	73	100	0.438573	0.380251	NO		41	51	46	46	100	0	46
chr1_114_tRNAGln_CTG-	TRQ-CTG10-1	chr1:146476760-146476831	chr1	146476760	146476831	II	49	36	42.5	103	63.44	0.875373	129	65.27	1.13297	1.00417	NO		47	21	34	63	38.04	0.539159	45	39.26	0.228819	0.383989	NO		55	36	45.5	81	67.16	0.556011	104	53.18	0.827684	0.691848	NO		72	50	61	75	36.41	0.206451	65
chr1_16_tRNAHis_GTG+	TRH-GTG1-2	chr1:146544773-146544844	chr1	146544773	146544844	II	39	49	44	1122	0	3.96047	1300	0	4.16776	4.06411	O		41	55	48	456	0	2.63941	475	0	2.69474	2.66707	O		50	64	57	539	0	2.70934	544	0	2.72196	2.71565	O		71	73	72	392	0	2.04867	440
chr1_17_Pseudo_TTC+	TRE-TTC14-1	chr1:146550178-146550249	chr1	146550178	146550249	II	66	71	68.5	70	0	0.0218044	56	0	-0.195787	-0.0869913	NO		85	53	69	63	0	-0.0901978	58	0	-0.169925	-0.130061	NO		121	29	75	54	0	-0.321928	70	0	-0.0703893	-0.196159	NO		77	55	66	60	0	-0.0931094	52
chr1_18_Pseudo_CCT+	TRR-CCT6-2	chr1:147483291-147483361	chr1	147483291	147483361	II	39	30	34.5	15	100	-0.519374	16	100	-0.487665	-0.50352	NO		31	7	19	13	100	-0.188445	16	100	-0.0911479	-0.139796	NO		3	29	16	13	100	-0.0972972	14	100	-0.0641303	-0.0807138	NO		27	25	26	24	100	-0.0524674	20
chr1_19_tRNAGln_CTG+	TRQ-CTG3-2	chr1:147505038-147505109	chr1	147505038	147505109	II	102	89	95.5	5433	100	5.44393	6553	100	5.71299	5.57846	O		88	101	94.5	1325	100	3.44408	1281	100	3.39645	3.42026	O		91	104	97.5	3289	100	4.70218	3361	100	4.73314	4.71766	O		55	76	65.5	1201	100	3.68819	1191
chr1_113_tRNAAsn_GTT-	TRN-GTT9-2	chr1:147520767-147520840	chr1	147520767	147520840	II	30	63	46.5	153	100	1.25831	160	100	1.31247	1.28539	NO		32	53	42.5	56	100	0.246356	50	100	0.142019	0.194187	NO		32	60	46	65	100	0.321928	73	100	0.438573	0.380251	NO		41	51	46	46	100	0	46
chr1_20_tRNAAsn_ATT+	TRN-ATT1-1	chr1:147719029-147719102	chr1	147719029	147719102	II	57	53	55	86	0	0.44859	97	0	0.579294	0.513942	NO		119	144	131.5	93	0	-0.392876	74	0	-0.634951	-0.513913	NO		99	123	111	101	0	-0.106128	97	0	-0.150867	-0.128498	NO		79	125	102	78	0	-0.289507	80
chr1_112_tRNAGln_CTG-	TRQ-CTG4-1	chr1:147737382-147737453	chr1	147737382	147737453	II	77	27	52	1481	0	4.20374	1779	0	4.46342	4.33358	O		44	107	75.5	550	0	2.45881	484	0	2.28453	2.37167	O		131	62	96.5	1083	0	3.13724	1263	0	3.35351	3.24538	O		52	38	45	416	0	2.57208	487
OTHER5	N/A	chr1:147752681-147752773	chr1	147752681	147752773	other	41	10	25.5	692	2	3.70144	698	1.94	3.71338	3.70741	O		28	57	42.5	126	5.78	1.10549	104	4.54	0.88618	0.995837	NO		10	30	20	289	2.55	2.67356	254	4.1	2.50589	2.58972	O		26	34	30	79	6.01	0.861294	84
chr1_21_tRNAHis_GTG+	TRH-GTG1-3	chr1:147753471-147753542	chr1	147753471	147753542	II	59	69	64	9288	100	6.63122	11428	100	6.92948	6.78035	O		65	46	55.5	3119	100	5.20283	2961	100	5.12856	5.16569	O		90	62	76	5630	100	5.73867	5710	100	5.75891	5.74879	O		100	53	76.5	2319	100	4.46312	2765
chr1_111_tRNAHis_GTG-	TRH-GTG1-4	chr1:147774845-147774916	chr1	147774845	147774916	II	64	83	73.5	9329	100	6.49865	11455	100	6.79398	6.64631	O		87	57	72	3140	100	4.95784	2981	100	4.8836	4.92072	O		108	71	89.5	5661	100	5.5736	5726	100	5.58998	5.58179	O		109	67	88	2335	100	4.32498	2775
OTHER2_RP3TR2	N/A	chr1:147775601-147775693	chr1	147775601	147775693	other	68	53	60.5	3202	0.04	5.15837	3413	0.04	5.2496	5.20399	O		83	51	67	669	0.46	2.84924	532	0.08	2.53451	2.69187	O		91	33	62	1542	0.09	4.09482	1324	0	3.87945	3.98714	O		57	57	57	384	0.22	2.25054	400
chr1_110_Pseudo_TTC-	TRE-TTC6-1	chr1:147781030-147781101	chr1	147781030	147781101	II	63	40	51.5	882	0	3.48416	909	0	3.52625	3.50521	O		90	35	62.5	164	0	1.06853	141	0	0.886471	0.977501	NO		63	60	61.5	289	0	1.80171	295	0	1.8286	1.81515	O		25	90	57.5	117	0	0.748461	132
chr1_22_tRNAGln_CTG+	TRQ-CTG7-1	chr1:147800937-147801008	chr1	147800937	147801008	II	99	72	85.5	109	0	0.267192	104	0	0.21434	0.240766	NO		60	83	71.5	54	0	-0.273018	50	0	-0.343408	-0.308213	NO		132	81	106.5	78	0	-0.33787	89	0	-0.197939	-0.267905	NO		56	49	52.5	68	0	0.248388	61
chr1_23_Pseudo_CTG+	TRQ-CTG9-1	chr1:147825689-147825760	chr1	147825689	147825760	II	68	66	67	1889	0	4.30623	2158	0	4.49548	4.40086	O		77	30	53.5	490	0	2.63866	498	0	2.66069	2.64968	O		98	62	80	856	0	3.0098	845	0	2.99178	3.00079	O		74	45	59.5	433	0	2.37105	515
chr1_109_Pseudo_GTT-	TRN-GTT23-1	chr1:147851060-147851133	chr1	147851060	147851133	II	17	35	26	15	52.94	-0.315502	21	21.95	-0.13493	-0.225216	NO		10	38	24	19	36.84	-0.140178	23	38.77	-0.026967	-0.0835724	NO		27	49	38	27	23.33	-0.254573	20	52.38	-0.443607	-0.34909	NO		41	57	49	20	20.83	-0.659925	20
chr1_24_tRNAAsn_GTT+	TRN-GTT16-4	chr1:147877537-147877610	chr1	147877537	147877610	II	24	39	31.5	18	100	-0.357552	15	100	-0.450661	-0.404107	NO		9	31	20	10	100	-0.321928	20	100	0	-0.160964	NO		14	25	19.5	12	100	-0.237039	12	100	-0.237039	-0.237039	NO		8	19	13.5	17	100	0.111645	15
chr1_25_tRNAAsn_GTT+	TRN-GTT7-1	chr1:148000805-148000878	chr1	148000805	148000878	II	56	30	43	7239	2.66	6.63772	7444	1.87	6.67784	6.65778	O		62	63	62.5	2880	1.43	4.97542	2360	2.1	4.69141	4.83342	O		70	46	58	4081	2.73	5.54584	4147	2	5.56882	5.55733	O		86	21	53.5	1702	2.66	4.37452	2028
chr1_26_tRNAAsn_GTT+	TRN-GTT2-1	chr1:148248115-148248188	chr1	148248115	148248188	II	74	76	75	10146	4.2	6.59864	11402	3.26	6.76654	6.68259	O		71	77	74	3215	3.03	4.96356	2646	3.75	4.68542	4.82449	O		58	75	66.5	6053	3.52	5.97811	6083	2.87	5.98521	5.98166	O		90	101	95.5	1934	3.98	3.96804	2072
chr1_108_tRNAAsn_GTT-	TRN-GTT3-1	chr1:148598314-148598387	chr1	148598314	148598387	II	51	41	46	4868	40.73	6.01005	5418	38.81	6.16358	6.08682	O		63	54	58.5	1443	37.97	4.05694	1256	41.85	3.86107	3.959	O		49	53	51	2441	39.67	4.93103	2353	38.6	4.87871	4.90487	O		57	73	65	876	41.13	3.25351	948
chr1_107_tRNAAsn_GTT-	TRN-GTT3-2	chr1:148760356-148760429	chr1	148760356	148760429	II	23	28	25.5	2084	99.46	5.25134	2178	99.56	5.31411	5.28273	O		28	31	29.5	564	99.44	3.3195	553	98.8	3.29253	3.30602	O		24	30	27	1029	99.64	4.2156	960	99.48	4.11839	4.167	O		21	36	28.5	373	99.76	2.78427	413
chr1_27_Pseudo_CTG+	TRQ-CTG11-1	chr1:149079364-149079435	chr1	149079364	149079435	II	9	39	24	315	0.19	2.67557	373	0.14	2.89975	2.78766	O		53	50	51.5	95	0.36	0.617056	97	1.29	0.639957	0.628506	NO		140	32	86	162	0.28	0.726982	139	1.42	0.542898	0.63494	NO		19	33	26	112	0	1.34239	93
chr1_106_tRNAHis_GTG-	TRH-GTG2-1	chr1:149155828-149155899	chr1	149155828	149155899	II	47	14	30.5	49	0	0.384918	53	0	0.456176	0.420547	NO		46	46	46	54	0	0.14439	53	0	0.127112	0.135751	NO		86	52	69	48	0	-0.343954	48	0	-0.343954	-0.343954	NO		71	38	54.5	52	0	-0.0433274	33
chr1_105_Pseudo_TTC-	TRE-TTC7-1	chr1:149161628-149161699	chr1	149161628	149161699	II	51	49	50	71	0	0.336283	81	0	0.472488	0.404386	NO		47	107	77	52	0	-0.383915	61	0	-0.233672	-0.308794	NO		21	47	34	87	0	0.870365	67	0	0.599913	0.735139	NO		59	34	46.5	58	0	0.202044	76
chr1_28_tRNAGln_CTG+	TRQ-CTG4-2	chr1:149186125-149186196	chr1	149186125	149186196	II	57	90	73.5	1495	0	3.88111	1662	0	4.03103	3.95607	O		100	78	89	338	0	1.62874	330	0	1.59704	1.61289	NO		72	73	72.5	864	0	3.12465	805	0	3.02615	3.0754	O		73	58	65.5	336	0	1.93827	420
chr1_104_Pseudo_GTT-	TRN-GTT22-1	chr1:149211948-149212021	chr1	149211948	149212021	II	124	28	76	19	0	-1.11321	54	0	-0.335603	-0.724407	NO		49	43	46	60	0	0.243926	38	0	-0.160465	0.0417305	NO		70	37	53.5	59	0	0.0920291	58	0	0.0757273	0.0838782	NO		56	94	75	51	0	-0.374396	58
chr1_103_tRNAAsn_GTT-	TRN-GTT6-1	chr1:149230570-149230643	chr1	149230570	149230643	II	48	75	61.5	689	0	2.97415	788	0	3.16026	3.0672	O		17	57	37	179	0	1.64127	172	0	1.59212	1.6167	NO		46	74	60	321	0	1.96347	268	0	1.72732	1.84539	O		41	42	41.5	164	0	1.44004	130
chr1_102_Pseudo_TTC-	TRE-TTC10-1	chr1:149278785-149278857	chr1	149278785	149278857	II	103	93	98	211	21.22	0.912889	260	21.68	1.17991	1.0464	NO		65	109	87	102	40.81	0.174029	94	39	0.0838316	0.12893	NO		96	80	88	174	26.25	0.789782	192	26.42	0.911773	0.850778	NO		65	119	92	100	42.85	0.0916305	100
chr1_101_tRNAAsn_GTT-	TRN-GTT15-1	chr1:149284503-149284576	chr1	149284503	149284576	II	175	115	145	166	9.74	0.163499	190	5.78	0.330149	0.246824	NO		138	288	213	140	7.8	-0.515422	142	8.97	-0.498548	-0.506985	NO		161	173	167	148	8.12	-0.146318	142	13.28	-0.195787	-0.171053	NO		136	302	219	127	10.2	-0.665381	123
chr1_100_Pseudo_GAA-	TRF-GAA9-1	chr1:149287359-149287430	chr1	149287359	149287430	II	190	172	181	369	9.13	0.919146	452	9.72	1.19179	1.05547	NO		151	99	125	140	8.88	0.133267	111	13.55	-0.136573	-0.00165326	NO		187	152	169.5	182	10.88	0.0876755	150	18.54	-0.148392	-0.0303582	NO		165	176	170.5	135	10.54	-0.281136	123
chr1_99_tRNAVal_CAC-	TRV-CAC8-1	chr1:149294666-149294736	chr1	149294666	149294736	II	61	46	53.5	6022	28.88	6.17949	6788	30.01	6.35143	6.26546	O		31	45	38	2603	22.86	5.27503	2890	30	5.42429	5.34966	O		27	39	33	4544	34.18	6.18196	4571	28.95	6.19045	6.18621	O		34	55	44.5	2805	34.27	5.24996	3245
chr1_98_tRNAVal_CAC-	TRV-CAC4-1	chr1:149298555-149298627	chr1	149298555	149298627	II	15	67	41	5926	14.23	6.39038	5937	11.99	6.39304	6.39171	O		61	37	49	2643	13.4	5.08046	2755	12.37	5.13968	5.11007	O		49	92	70.5	4851	11.43	5.60191	4221	12.14	5.40253	5.50222	O		46	40	43	2216	15.81	4.94332	2275
chr1_97_tRNAAsn_GTT-	TRN-GTT12-1	chr1:149326272-149326345	chr1	149326272	149326345	II	44	71	57.5	230	45.89	1.57116	272	52.33	1.78719	1.67918	O		32	48	40	103	28.28	0.925999	99	35.88	0.881944	0.903972	NO		49	55	52	116	38.88	0.832273	105	41.23	0.719264	0.775768	NO		107	48	77.5	71	36.71	-0.0899814	66
chr1_29_tRNAGlu_CTC+	TRE-CTC17-1	chr1:149334272-149334340	chr1	149334272	149334340	II	51	33	42	38	14.28	-0.0824622	38	15.06	-0.0824622	-0.0824622	NO		79	33	56	34	24.24	-0.426265	35	21.62	-0.403897	-0.415081	NO		48	18	33	53	6.89	0.39776	37	23.68	0.0888093	0.243284	NO		48	34	41	41	22.1	0	26
chr1_96_Pseudo_CCT-	TRR-CCT7-1	chr1:149343081-149343151	chr1	149343081	149343151	II	36	25	30.5	27	15.25	-0.0859732	28	18.51	-0.0608822	-0.0734277	NO		21	35	28	26	21.56	-0.0506261	37	29.11	0.208108	0.0787411	NO		7	58	32.5	18	31.7	-0.380822	26	25.92	-0.158429	-0.269626	NO		12	19	15.5	25	22.03	0.273565	27
chr1_30_tRNAAsn_GTT+	TRN-GTT16-5	chr1:149608609-149608682	chr1	149608609	149608682	II	24	26	25	18	70.24	-0.196397	16	80.41	-0.257798	-0.227097	NO		8	23	15.5	15	66.32	-0.0159415	20	77.22	0.136062	0.06006	NO		12	33	22.5	22	79.52	-0.0138058	12	76.31	-0.321928	-0.167867	NO		24	23	23.5	25	69.91	0.0398927	24
chr1_95_tRNAAsn_GTT-	TRN-GTT11-2	chr1:149615617-149615690	chr1	149615617	149615690	II	19	25	22	19	100	-0.0857299	18	100	-0.115477	-0.100604	NO		37	40	38.5	21	100	-0.425607	20	100	-0.454176	-0.439891	NO		16	16	16	22	100	0.176878	19	100	0.0911479	0.134013	NO		19	29	24	16	100	-0.231326	16
chr1_94_tRNAGlu_TTC-	TRE-TTC8-1	chr1:149664355-149664427	chr1	149664355	149664427	II	74	112	93	266	16.86	1.26694	349	16.16	1.62354	1.44524	NO		26	83	54.5	109	38.09	0.718062	96	38.23	0.5764	0.647231	NO		59	71	65	241	19	1.51229	246	20.56	1.53867	1.52548	NO		49	82	65.5	114	37.64	0.592496	87
chr1_93_tRNAAsn_GTT-	TRN-GTT19-1	chr1:149670057-149670130	chr1	149670057	149670130	II	36	59	47.5	55	28.92	0.133267	41	26.58	-0.126377	0.00344462	NO		53	72	62.5	37	29.57	-0.465292	53	23.89	-0.156342	-0.310817	NO		42	70	56	37	31.7	-0.360176	55	33.92	-0.0168738	-0.188525	NO		61	71	66	44	29.41	-0.375509	33
chr1_92_Pseudo_GAA-	TRF-GAA10-1	chr1:149672905-149672976	chr1	149672905	149672976	II	92	98	95	209	16.11	0.935083	266	16.47	1.24367	1.08938	NO		64	150	107	50	25	-0.776104	66	22.85	-0.51307	-0.644587	NO		51	75	63	74	26.7	0.161281	83	33.33	0.28102	0.221151	NO		82	115	98.5	63	22.44	-0.466466	53
chr1_91_Pseudo_CCC-	TRG-CCC6-1	chr1:149680210-149680280	chr1	149680210	149680280	II	12	40	26	4490	36.37	6.33475	5447	35.77	6.61182	6.47328	O		14	11	12.5	1904	31.25	5.50798	2189	39.2	5.7063	5.60714	O		21	16	18.5	3880	38.91	6.33304	3762	33.14	6.28883	6.31094	O		54	54	54	2180	43.93	4.71751	2374
chr1_90_tRNAVal_CAC-	TRV-CAC5-1	chr1:149684088-149684161	chr1	149684088	149684161	II	51	67	59	4522	20.6	5.67655	3942	19.47	5.47992	5.57823	O		40	64	52	1986	19.04	4.61973	1828	19.95	4.50198	4.56086	O		21	81	51	3308	17.83	5.36492	3257	16.69	5.34271	5.35381	O		27	51	39	1760	21.18	4.69722	1712
chr1_89_tRNAAsn_GTT-	TRN-GTT8-1	chr1:149711798-149711871	chr1	149711798	149711871	II	49	81	65	552	32.16	2.61502	654	29.13	2.848	2.73151	O		53	118	85.5	165	26.41	0.755581	166	24.43	0.762961	0.759271	NO		51	133	92	230	29.31	1.09163	236	28.99	1.12455	1.10809	NO		40	70	55	163	20.28	1.18307	150
chr1_31_tRNAGlu_TTC+	TRE-TTC16-1	chr1:149719802-149719870	chr1	149719802	149719870	II	33	39	36	36	15.38	0	28	20	-0.186413	-0.0932066	NO		23	49	36	37	22.22	0.0216951	38	19.51	0.0430687	0.0323819	NO		53	36	44.5	37	9.75	-0.153079	33	26.47	-0.241889	-0.197484	NO		48	70	59	34	26.58	-0.475733	34
chr1_88_Pseudo_CCT-	TRR-CCT8-1	chr1:149728271-149728341	chr1	149728271	149728341	II	21	39	30	35	11.68	0.115477	36	14.28	0.137504	0.12649	NO		40	52	46	31	18.03	-0.31719	37	29.11	-0.181838	-0.249514	NO		41	41	41	41	14.6	0	38	17.94	-0.0622843	-0.0311421	NO		33	30	31.5	41	13.68	0.207233	26
chr1_87_tRNAAla_AGC-	TRA-AGC20-1	chr1:150017382-150017452	chr1	150017382	150017452	II	21	13	17	26	0	0.252766	31	0	0.376148	0.314457	NO		26	12	19	19	0	0	28	0	0.243271	0.121636	NO		21	46	33.5	23	0	-0.260764	32	0	-0.0344884	-0.147626	NO		25	39	32	19	0	-0.339486	30
AluSq_SINE_Alu_150849456	N/A	chr1:150849456-150849752	chr1	150849456	150849752	II	51	65	58	653	0	2.95631	740	0	3.12928	3.0428	O		98	61	79.5	169	0	0.861838	125	0	0.501337	0.681587	NO		119	64	91.5	340	0	1.60657	329	0	1.56303	1.5848	O		56	72	64	78	0	0.200299	100
chr1_32_tRNAMet_CAT+	TRX-CAT1-1	chr1:153643726-153643797	chr1	153643726	153643797	II	21	34	27.5	9987	0	7.44467	11196	0	7.60907	7.52687	O		24	37	30.5	6752	0	6.80863	6767	0	6.81182	6.81023	O		32	27	29.5	8701	0	7.19711	10460	0	7.46191	7.32951	O		27	30	28.5	5790	0	6.63644	6825
chr1_86_tRNAArg_TCT-	TRR-TCT4-1	chr1:159111401-159111474	chr1	159111401	159111474	II	51	19	35	3029	0	5.55648	3505	0	5.76513	5.6608	O		26	80	53	1603	0	4.29827	1416	0	4.12281	4.21054	O		44	48	46	1928	0	4.68724	1710	0	4.51694	4.60209	O		33	57	45	1104	0	3.91839	1158
MER50_LTR_ERV1	N/A	chr1:160895487-160895761	chr1	160895487	160895761	other	36	66	51	612	0	2.98658	636	0	3.03953	3.01305	O		40	38	39	265	0	2.09605	314	0	2.31774	2.20689	O		14	31	22.5	384	0	2.97924	341	0	2.82103	2.90014	O		40	72	56	258	0	1.74366	294
chr1_85_tRNAVal_CAC-	TRV-CAC1-1	chr1:161369490-161369562	chr1	161369490	161369562	II	78	50	64	8729	0	6.54196	8886	0	6.56759	6.55478	O		86	91	88.5	5276	0	5.48467	4297	0	5.19041	5.33754	O		62	44	53	7544	0	6.5118	7236	0	6.45191	6.48185	O		30	114	72	4182	0	5.36786	4265
chr1_33_Pseudo_???+	TRU-NNN3-1	chr1:161390661-161390733	chr1	161390661	161390733	II	67	54	60.5	247	0	1.6139	262	0	1.68998	1.65194	O		28	131	79.5	64	0	-0.220198	80	0	0.00657265	-0.106813	NO		61	82	71.5	199	0	1.17387	178	0	1.0351	1.10449	NO		49	57	53	53	0	0	74
chr1_84_tRNAGlu_TTC-	TRE-TTC4-2	chr1:161391883-161391954	chr1	161391883	161391954	II	59	41	50	9646	0.68	6.91827	10745	0.73	7.07347	6.99587	O		124	93	108.5	3131	0.57	4.51242	3002	0.61	4.45231	4.48237	O		83	113	98	5691	0.62	5.48205	5541	0.49	5.44372	5.46289	O		75	77	76	2054	0.75	4.29722	2181
chr1_83_tRNAAsn_GTT-	TRN-GTT2-2	chr1:161397867-161397940	chr1	161397867	161397940	II	14	24	19	9418	0	7.59108	11138	0	7.83237	7.71173	O		54	49	51.5	4264	0	5.71938	3841	0	5.56976	5.64457	O		24	47	35.5	7291	0	6.8044	7787	0	6.89898	6.85169	O		56	21	38.5	3314	0	5.60933	3700
chr1_82_tRNAGly_TCC-	TRG-TCC4-1	chr1:161409961-161410032	chr1	161409961	161410032	II	43	39	41	5012	0	6.15003	4823	0	6.09491	6.12247	O		79	60	69.5	694	0	2.86322	217	0	1.31174	2.08748	O		76	89	82.5	3066	0	4.78241	1364	0	3.63123	4.20682	O		108	69	88.5	512	0	2.19341	322
chr1_81_tRNAAsp_GTC-	TRD-GTC2-1	chr1:161410615-161410686	chr1	161410615	161410686	II	57	93	75	4557	30.84	5.44909	5877	32.88	5.81396	5.63153	O		64	100	82	1579	19.92	3.84459	784	21.49	2.86153	3.35306	O		102	129	115.5	3531	27.83	4.61319	3251	26.26	4.49504	4.55412	O		93	124	108.5	963	24.27	2.84191	853
chr1_34_tRNALeu_CAG+	TRL-CAG1-1	chr1:161411323-161411405	chr1	161411323	161411405	II	308	205	256.5	1725	100	2.61486	1907	99.94	2.75722	2.68604	O		235	241	238	508	100	1.00537	377	100	0.602796	0.804084	NO		332	247	289.5	1174	100	1.91395	1037	100	1.73967	1.82681	O		366	281	323.5	287	100	-0.157227	273
chr1_35_tRNAGly_GCC+	TRG-GCC1-1	chr1:161413094-161413164	chr1	161413094	161413164	II	342	289	315.5	4170	100	3.60363	4626	100	3.75233	3.67798	O		266	354	310	732	100	1.16426	394	100	0.31853	0.741393	NO		335	341	338	2113	100	2.54185	1556	100	2.10762	2.32473	O		416	363	389.5	559	100	0.489597	476
chr1_80_tRNAGlu_CTC-	TRE-CTC1-2	chr1:161417018-161417089	chr1	161417018	161417089	II	155	153	154	10316	100	5.81322	11793	100	6.00575	5.90949	O		152	270	211	2425	100	3.34862	1247	100	2.40565	2.87714	O		165	266	215.5	6254	100	4.67789	3940	100	4.01534	4.34662	O		276	308	292	1702	100	2.42731	1332
chr1_79_tRNAGly_TCC-	TRG-TCC2-2	chr1:161417375-161417446	chr1	161417375	161417446	II	9	31	20	1291	100	4.72356	1468	100	4.90497	4.81426	O		28	56	42	228	100	1.8413	52	100	0.187627	1.01446	NO		29	63	46	1042	100	3.81816	401	100	2.50362	3.16089	O		35	83	59	293	100	1.85966	153
chr1_78_tRNAAsp_GTC-	TRD-GTC2-2	chr1:161418033-161418104	chr1	161418033	161418104	II	68	122	95	3192	100	4.68796	3848	100	4.95531	4.82163	O		92	166	129	691	100	2.18097	273	100	0.930291	1.55563	NO		104	164	134	2257	100	3.80169	1582	100	3.29708	3.54939	O		150	195	172.5	497	100	1.37988	348
chr1_36_tRNALeu_CAG+	TRL-CAG1-2	chr1:161418741-161418823	chr1	161418741	161418823	II	308	210	259	1833	100	2.68849	2006	100	2.8166	2.75254	O		245	253	249	537	100	1.02308	380	100	0.555359	0.789221	NO		335	253	294	1254	100	1.98658	1060	100	1.75026	1.86842	O		373	301	337	308	100	-0.118757	282
chr1_37_tRNAGly_GCC+	TRG-GCC1-2	chr1:161420467-161420537	chr1	161420467	161420537	II	472	372	422	5100	100	3.50456	5653	100	3.65226	3.57841	O		418	454	436	978	100	1.11309	583	100	0.395557	0.754325	NO		569	413	491	2631	100	2.35261	2057	100	2.00208	2.17734	O		586	440	513	682	100	0.390925	646
chr1_77_tRNAGlu_CTC-	TRE-CTC1-3	chr1:161424398-161424469	chr1	161424398	161424469	II	126	199	162.5	8811	100	5.52128	9911	100	5.69046	5.60587	O		149	285	217	1720	100	2.82477	905	100	1.92046	2.37261	O		152	280	216	4721	100	4.2715	2851	100	3.54984	3.91067	O		252	300	276	1332	100	2.15412	1050
chr1_76_tRNAGly_TCC-	TRG-TCC2-3	chr1:161424756-161424827	chr1	161424756	161424827	II	12	87	49.5	1262	100	4.02251	1405	100	4.17395	4.09823	O		45	104	74.5	185	100	1.04083	45	100	-0.47854	0.281147	NO		28	99	63.5	798	100	3.14659	281	100	1.73388	2.44023	O		66	130	98	210	100	0.906891	108
chr1_75_tRNAAsp_GTC-	TRD-GTC2-3	chr1:161425414-161425485	chr1	161425414	161425485	II	68	122	95	3192	100	4.68796	3848	100	4.95531	4.82163	O		92	166	129	691	100	2.18097	273	100	0.930291	1.55563	NO		104	164	134	2257	100	3.80169	1582	100	3.29708	3.54939	O		150	195	172.5	497	100	1.37988	348
chr1_38_tRNALeu_CAG+	TRL-CAG1-3	chr1:161426122-161426204	chr1	161426122	161426204	II	242	173	207.5	1239	98.5	2.41769	1366	97.7	2.5553	2.4865	O		201	199	200	374	96.93	0.812721	276	92.79	0.411898	0.61231	NO		295	187	241	843	98.57	1.68769	737	98.1	1.50093	1.59431	O		281	257	269	212	97.96	-0.305138	204
chr1_39_tRNAGly_GCC+	TRG-GCC1-3	chr1:161427898-161427968	chr1	161427898	161427968	II	342	289	315.5	4170	100	3.60363	4626	100	3.75233	3.67798	O		266	354	310	732	100	1.16426	394	100	0.31853	0.741393	NO		335	341	338	2113	100	2.54185	1556	100	2.10762	2.32473	O		416	363	389.5	559	100	0.489597	476
chr1_74_tRNAGlu_CTC-	TRE-CTC1-4	chr1:161431809-161431880	chr1	161431809	161431880	II	155	153	154	10316	100	5.81322	11793	100	6.00575	5.90949	O		152	270	211	2425	100	3.34862	1247	100	2.40565	2.87714	O		165	266	215.5	6254	100	4.67789	3940	100	4.01534	4.34662	O		276	308	292	1702	100	2.42731	1332
chr1_73_tRNAGly_TCC-	TRG-TCC2-4	chr1:161432166-161432237	chr1	161432166	161432237	II	9	31	20	1291	100	4.72356	1468	100	4.90497	4.81426	O		28	56	42	228	100	1.8413	52	100	0.187627	1.01446	NO		29	63	46	1042	100	3.81816	401	100	2.50362	3.16089	O		35	83	59	293	100	1.85966	153
chr1_72_tRNAAsp_GTC-	TRD-GTC2-4	chr1:161432824-161432895	chr1	161432824	161432895	II	68	122	95	3192	100	4.68796	3848	100	4.95531	4.82163	O		92	166	129	691	100	2.18097	273	100	0.930291	1.55563	NO		104	164	134	2257	100	3.80169	1582	100	3.29708	3.54939	O		150	195	172.5	497	100	1.37988	348
chr1_40_tRNALeu_CAG+	TRL-CAG1-4	chr1:161433532-161433614	chr1	161433532	161433614	II	308	210	259	1833	100	2.68849	2006	100	2.8166	2.75254	O		245	253	249	537	100	1.02308	380	100	0.555359	0.789221	NO		335	253	294	1254	100	1.98658	1060	100	1.75026	1.86842	O		373	301	337	308	100	-0.118757	282
chr1_41_tRNAGly_GCC+	TRG-GCC1-4	chr1:161435258-161435328	chr1	161435258	161435328	II	472	372	422	5100	100	3.50456	5653	100	3.65226	3.57841	O		418	454	436	978	100	1.11309	583	100	0.395557	0.754325	NO		569	413	491	2631	100	2.35261	2057	100	2.00208	2.17734	O		586	440	513	682	100	0.390925	646
chr1_71_tRNAGlu_CTC-	TRE-CTC1-5	chr1:161439189-161439260	chr1	161439189	161439260	II	126	199	162.5	8811	100	5.52128	9911	100	5.69046	5.60587	O		149	285	217	1720	100	2.82477	905	100	1.92046	2.37261	O		152	280	216	4721	100	4.2715	2851	100	3.54984	3.91067	O		252	300	276	1332	100	2.15412	1050
chr1_70_tRNAGly_TCC-	TRG-TCC2-5	chr1:161439547-161439618	chr1	161439547	161439618	II	12	87	49.5	1262	100	4.02251	1405	100	4.17395	4.09823	O		45	104	74.5	185	100	1.04083	45	100	-0.47854	0.281147	NO		28	99	63.5	798	100	3.14659	281	100	1.73388	2.44023	O		66	130	98	210	100	0.906891	108
chr1_69_tRNAAsp_GTC-	TRD-GTC2-5	chr1:161440205-161440276	chr1	161440205	161440276	II	68	122	95	3098	100	4.64524	3806	100	4.9396	4.79242	O		91	166	128.5	688	100	2.1795	273	100	0.934835	1.55717	NO		104	164	134	2201	100	3.76592	1580	100	3.29529	3.53061	O		149	191	170	488	100	1.37295	348
chr1_42_tRNALeu_CAG+	TRL-CAG1-5	chr1:161440913-161440995	chr1	161440913	161440995	II	308	210	259	1833	100	2.68849	2006	100	2.8166	2.75254	O		245	253	249	537	100	1.02308	380	100	0.555359	0.789221	NO		335	253	294	1254	100	1.98658	1060	100	1.75026	1.86842	O		373	301	337	308	100	-0.118757	282
chr1_43_tRNAGly_GCC+	TRG-GCC4-1	chr1:161450356-161450426	chr1	161450356	161450426	II	87	54	70.5	695	0	2.85079	809	0	3.06148	2.95613	O		64	115	89.5	293	0	1.43452	251	0	1.23356	1.33404	NO		242	52	147	605	0	1.84301	555	0	1.72469	1.78385	O		197	147	172	268	0	0.560957	283
chr1_44_Pseudo_GTC+	TRD-GTC10-1	chr1:161492935-161493006	chr1	161492935	161493006	II	33	22	27.5	265	0.52	2.35908	276	1.13	2.4119	2.38549	O		42	47	44.5	148	1.75	1.25656	153	0.3	1.29653	1.27655	NO		9	29	19	282	1.47	2.67069	269	0.73	2.60929	2.63999	O		53	30	41.5	154	0.84	1.36369	158
chr1_68_tRNAGly_GCC-	TRG-GCC2-1	chr1:161493637-161493707	chr1	161493637	161493707	II	64	33	48.5	7504	0	6.58458	8716	0	6.79979	6.69218	O		10	37	23.5	5205	0	6.61251	4543	0	6.41746	6.51498	O		50	47	48.5	7303	0	6.54557	6998	0	6.48428	6.51492	O		34	34	34	4651	0	6.1926	5043
chr1_67_tRNALeu_CAG-	TRL-CAG1-6	chr1:161500132-161500214	chr1	161500132	161500214	II	24	38	31	10672	5.17	7.45486	13132	6.02	7.75335	7.6041	O		27	16	21.5	6604	5.1	7.00916	5873	5.44	6.84073	6.92495	O		35	64	49.5	9755	4.84	6.94347	11215	5.23	7.14411	7.04379	O		27	39	33	5521	5.05	6.46125	6103
chr1_45_tRNAGly_TCC+	TRG-TCC2-6	chr1:161500903-161500974	chr1	161500903	161500974	II	26	55	40.5	11198	0.35	7.31526	15120	0.18	7.74748	7.53137	O		19	75	47	7797	0.26	6.66746	7746	0.25	6.65803	6.66274	O		79	32	55.5	10409	0.29	6.93184	12649	0.2	7.2123	7.07207	O		37	59	48	6440	0.26	6.37415	7459
chr1_46_tRNAAsp_GTC+	TRD-GTC7-1	chr1:161501915-161501986	chr1	161501915	161501986	II	5	7	6	54	0	1.22239	65	0	1.39993	1.31116	NO		6	52	29	26	0	-0.0752881	20	0	-0.238787	-0.157037	NO		10	17	13.5	36	0	0.601451	28	0	0.415037	0.508244	NO		9	36	22.5	21	0	-0.0418202	24
chr1_47_tRNAAsn_GTT+	TRN-GTT1-1	chr1:161510031-161510104	chr1	161510031	161510104	II	30	91	60.5	12138	0.4	7.07096	12015	0.24	7.0563	7.06363	O		38	70	54	5025	0.28	5.91118	4600	0.24	5.78448	5.84783	O		53	62	57.5	10032	0.24	6.84542	8962	0.25	6.68322	6.76432	O		117	73	95	4009	0.36	5.014	3986
chr1_48_tRNAAsp_GTC+	TRD-GTC9-1	chr1:161574588-161574659	chr1	161574588	161574659	II	0	0	0	1	100	0.0473057	3	100	0.137504	0.0924046	NO		0	3	1.5	2	100	0.0227201	0	100	-0.0703893	-0.0238346	NO		0	0	0	4	100	0.180572	1	100	0.0473057	0.113939	NO		0	0	0	1	100	0.0473057	0
chr1_66_tRNALeu_CAA-	TRL-CAA6-1	chr1:161581736-161581819	chr1	161581736	161581819	II	0	0	0	998	48.1	5.09873	1193	56.82	5.34932	5.22403	O		1	9	5	581	57.45	4.12575	582	54.75	4.1281	4.12693	O		1	2	1.5	781	53.88	4.68628	963	54.72	4.97837	4.83232	O		2	6	4	519	53.34	4.0132	567
chr1_49_tRNAGlu_TTC+	TRE-TTC5-1	chr1:161582508-161582579	chr1	161582508	161582579	II	3	0	1.5	32	100	0.976916	21	100	0.695145	0.836031	NO		0	0	0	20	100	0.736966	20	95.34	0.736966	0.736966	NO		3	0	1.5	25	100	0.80408	21	100	0.695145	0.749613	NO		0	6	3	16	100	0.479168	15
chr1_50_tRNAAsn_GTT+	TRN-GTT17-1	chr1:161591465-161591538	chr1	161591465	161591538	II	0	2	1	44	100	1.25526	26	100	0.853159	1.05421	NO		1	0	0.5	14	100	0.528694	11	100	0.426815	0.477754	NO		0	2	1	23	100	0.773724	22	100	0.746243	0.759984	NO		0	2	1	14	100	0.505235	14
chr1_51_Pseudo_CTT+	TRK-CTT13-1	chr1:165566150-165566222	chr1	165566150	165566222	II	34	67	50.5	53	0	0.0441226	37	0	-0.264828	-0.110353	NO		36	35	35.5	43	0	0.156402	50	0	0.288505	0.222453	NO		39	39	39	40	0	0.0207586	44	0	0.100929	0.0608437	NO		35	36	35.5	33	0	-0.0561431	33
chr1_52_tRNAPro_CGG+	TRP-CGG1-1	chr1:167683962-167684033	chr1	167683962	167684033	II	81	72	76.5	15641	0	7.2011	16720	0	7.29716	7.24913	O		49	83	66	10876	0	6.82787	8253	0	6.43098	6.62942	O		62	78	70	13629	0	7.09371	14346	0	7.16752	7.13061	O		74	75	74.5	7646	0	6.19878	8275
chr1_65_tRNAPro_AGG-	TRP-AGG2-1	chr1:167684725-167684796	chr1	167684725	167684796	II	10	24	17	7859	0	7.39104	8855	0	7.56257	7.4768	O		2	9	5.5	4693	0	7.05574	4852	0	7.10351	7.07963	O		36	13	24.5	7046	0	7.02053	8285	0	7.25332	7.13693	O		12	16	14	3620	0	6.37425	4475
chr1_64_tRNAGlu_TTC-	TRE-TTC12-1	chr1:172157539-172157607	chr1	172157539	172157607	II	0	11	5.5	16	0	0.373815	21	0	0.522678	0.448247	NO		10	21	15.5	14	0	-0.048363	23	0	0.220126	0.0858814	NO		21	16	18.5	22	0	0.100527	26	0	0.207442	0.153984	NO		2	17	9.5	14	0	0.155651	21
chr1_53_Pseudo_???+	TRU-NNN7-1	chr1:178678038-178678110	chr1	178678038	178678110	II	14	27	20.5	24	0	0.096676	33	0	0.319068	0.207872	NO		13	29	21	14	0	-0.212994	24	0	0.0824622	-0.0652658	NO		12	24	18	24	0	0.169925	27	0	0.247928	0.208926	NO		30	19	24.5	17	0	-0.213595	30
chr1_63_tRNAVal_AAC-	TRV-AAC7-1	chr1:180184276-180184348	chr1	180184276	180184348	II	31	26	28.5	24	1.33	-0.115477	28	1.5	-0.0123837	-0.0639305	NO		17	25	21	18	2.03	-0.0874628	30	2.4	0.234465	0.0735012	NO		5	27	16	18	1.73	0.0614005	18	1.29	0.0614005	0.0614005	NO		8	25	16.5	23	2.39	0.188762	19
chr1_54_tRNALys_TTT+	TRK-TTT3-1	chr1:204475655-204475727	chr1	204475655	204475727	II	17	38	27.5	5122	0	6.48543	5615	0	6.61727	6.55135	O		20	10	15	3533	0	6.30702	3459	0	6.27674	6.29188	O		16	27	21.5	5743	0	6.8086	4583	0	6.48499	6.6468	O		25	12	18.5	3461	0	6.16951	3230
chr1_62_tRNALys_TTT-	TRK-TTT3-2	chr1:204476158-204476230	chr1	204476158	204476230	II	45	44	44.5	10282	0	7.11287	12264	0	7.3665	7.23968	O		15	7	11	6849	0	7.39043	6453	0	7.30489	7.34766	O		9	28	18.5	9401	0	7.60328	9933	0	7.68245	7.64287	O		37	28	32.5	5026	0	6.338	5516
chr1_55_tRNALys_TTT+	TRK-TTT8-1	chr1:205443271-205443343	chr1	205443271	205443343	II	40	27	33.5	78	0	0.766203	77	0	0.752782	0.759493	NO		58	53	55.5	50	0	-0.0959244	50	0	-0.0959244	-0.0959244	NO		40	69	54.5	54	0	-0.00856201	58	0	0.0585522	0.0249951	NO		121	39	80	27	0	-0.94847	41
chr1_61_Pseudo_TGG-	TRP-TGG5-1	chr1:207178154-207178230	chr1	207178154	207178230	II	51	38	44.5	33	0	-0.241889	35	0	-0.196801	-0.219345	NO		41	21	31	43	0	0.259087	56	0	0.495527	0.377307	NO		26	33	29.5	44	0	0.314636	35	0	0.12755	0.221093	NO		28	43	35.5	47	0	0.233364	40
chr1_56_tRNAThr_TGT+	TRT-TGT2-1	chr1:222638347-222638419	chr1	222638347	222638419	II	24	70	47	8148	0	6.73075	9025	0	6.87771	6.80423	O		47	27	37	3154	0	5.57054	2924	0	5.46236	5.51645	O		32	50	41	5625	0	6.31556	5260	0	6.2193	6.26743	O		32	25	28.5	2272	0	5.29831	2307
5S_rRNA-related_1	RN5S1@	chr1:228746011-228746133	chr1	228746011	228746133	I	126	197	161.5	9338	100	5.61232	10782	100	5.81915	5.71573	O		133	264	198.5	3444	100	3.92633	2478	100	3.45627	3.6913	O		160	216	188	6712	100	4.95078	4549	100	4.39263	4.6717	O		158	250	204	2836	100	3.61446	2297
5S_rRNA-related_2	RN5S1@	chr1:228748252-228748374	chr1	228748252	228748374	I	126	197	161.5	9338	100	5.61232	10782	100	5.81915	5.71573	O		133	264	198.5	3444	100	3.92633	2478	100	3.45627	3.6913	O		160	216	188	6712	100	4.95078	4549	100	4.39263	4.6717	O		158	250	204	2836	100	3.61446	2297
5S_rRNA-related_3	RN5S1@	chr1:228750493-228750615	chr1	228750493	228750615	I	126	197	161.5	9338	100	5.61232	10782	100	5.81915	5.71573	O		133	264	198.5	3444	100	3.92633	2478	100	3.45627	3.6913	O		160	216	188	6712	100	4.95078	4549	100	4.39263	4.6717	O		158	250	204	2836	100	3.61446	2297
5S_rRNA-related_4	RN5S1@	chr1:228752734-228752856	chr1	228752734	228752856	I	126	196	161	9334	100	5.61548	10779	100	5.82252	5.719	O		133	263	198	3443	100	3.92908	2478	100	3.45943	3.69425	O		160	209	184.5	6708	100	4.97327	4549	100	4.41598	4.69463	O		158	239	198.5	2834	100	3.64777	2296
5S_rRNA-related_5	RN5S1@	chr1:228754975-228755097	chr1	228754975	228755097	I	126	197	161.5	9338	100	5.61232	10782	100	5.81915	5.71573	O		133	264	198.5	3444	100	3.92633	2478	100	3.45627	3.6913	O		160	216	188	6712	100	4.95078	4549	100	4.39263	4.6717	O		158	250	204	2836	100	3.61446	2297
5S_rRNA-related_6	RN5S1@	chr1:228757190-228757312	chr1	228757190	228757312	I	126	196	161	9334	100	5.61548	10779	100	5.82252	5.719	O		133	263	198	3443	100	3.92908	2478	100	3.45943	3.69425	O		160	209	184.5	6708	100	4.97327	4549	100	4.41598	4.69463	O		158	239	198.5	2834	100	3.64777	2296
RN5S_1	RN5S1@	chr1:228759411-228759532	chr1	228759411	228759532	I	124	196	160	9330	100	5.62244	10778	100	5.82996	5.7262	O		132	263	197.5	3442	100	3.93183	2477	100	3.46202	3.69693	O		159	208	183.5	6707	100	4.9798	4548	100	4.42241	4.7011	O		158	239	198.5	2834	100	3.64777	2296
RN5S_2	RN5S1@	chr1:228761653-228761774	chr1	228761653	228761774	I	124	197	160.5	9334	100	5.61926	10780	100	5.82643	5.72285	O		132	263	197.5	3443	100	3.93224	2477	100	3.46202	3.69713	O		159	215	187	6711	100	4.9572	4548	100	4.39895	4.67807	O		158	250	204	2835	100	3.61395	2296
RN5S_3	RN5S1@	chr1:228763892-228764013	chr1	228763892	228764013	I	138	221	179.5	4852	95.12	4.54245	5722	94.89	4.77904	4.66075	O		140	268	204	1857	96.74	3.01151	1250	96.81	2.45156	2.73154	O		128	237	182.5	3512	97.08	4.05903	2300	96.14	3.4548	3.75691	O		143	243	193	1486	95.79	2.76515	1138
RN5S_4	RN5S1@	chr1:228766134-228766255	chr1	228766134	228766255	I	124	197	160.5	9334	100	5.61926	10780	100	5.82643	5.72285	O		132	263	197.5	3443	100	3.93224	2477	100	3.46202	3.69713	O		159	215	187	6711	100	4.9572	4548	100	4.39895	4.67807	O		158	250	204	2835	100	3.61395	2296
RN5S_5	RN5S1@	chr1:228768375-228768496	chr1	228768375	228768496	I	124	202	163	9342	99.85	5.60168	10787	99.88	5.80856	5.70512	O		131	270	200.5	3446	99.84	3.91459	2477	100	3.44312	3.67886	O		158	215	186.5	6716	99.84	4.96159	4549	99.95	4.40259	4.68209	O		158	261	209.5	2837	99.84	3.58144	2297
RN5S_6	RN5S1@	chr1:228770615-228770736	chr1	228770615	228770736	I	124	197	160.5	9334	100	5.61926	10780	100	5.82643	5.72285	O		132	263	197.5	3443	100	3.93224	2477	100	3.46202	3.69713	O		159	215	187	6711	100	4.9572	4548	100	4.39895	4.67807	O		158	250	204	2835	100	3.61395	2296
RN5S_7	RN5S1@	chr1:228772840-228772961	chr1	228772840	228772961	I	124	197	160.5	9334	100	5.61926	10780	100	5.82643	5.72285	O		132	263	197.5	3443	100	3.93224	2477	100	3.46202	3.69713	O		159	215	187	6711	100	4.9572	4548	100	4.39895	4.67807	O		158	250	204	2835	100	3.61395	2296
RN5S_8	RN5S1@	chr1:228775081-228775202	chr1	228775081	228775202	I	123	190	156.5	9330	100	5.64926	10775	100	5.85638	5.75282	O		130	253	191.5	3441	100	3.96997	2477	100	3.50058	3.73528	O		158	204	181	6705	100	4.99636	4547	100	4.43909	4.71773	O		156	236	196	2832	100	3.66263	2295
RN5S_9	RN5S1@	chr1:228777312-228777433	chr1	228777312	228777433	I	77	117	97	7297	100	5.85032	8231	100	6.02342	5.93687	O		81	156	118.5	2556	100	4.12219	1915	100	3.71124	3.91671	O		98	129	113.5	5065	100	5.14996	3598	100	4.66005	4.90501	O		90	157	123.5	2112	100	3.80265	1819
RN5S_10	RN5S1@	chr1:228779553-228779674	chr1	228779553	228779674	I	77	117	97	7297	100	5.85032	8231	100	6.02342	5.93687	O		81	156	118.5	2556	100	4.12219	1915	100	3.71124	3.91671	O		98	129	113.5	5065	100	5.14996	3598	100	4.66005	4.90501	O		90	157	123.5	2112	100	3.80265	1819
RN5S_11	RN5S1@	chr1:228781784-228781905	chr1	228781784	228781905	I	124	197	160.5	9334	100	5.61926	10780	100	5.82643	5.72285	O		132	263	197.5	3443	100	3.93224	2477	100	3.46202	3.69713	O		159	215	187	6711	100	4.9572	4548	100	4.39895	4.67807	O		158	250	204	2835	100	3.61395	2296
chr1_57_Pseudo_TGG+	NMTRP-TGG1-1	chr1:238105862-238105933	chr1	238105862	238105933	II	0	3	1.5	19	0	0.63743	20	0	0.666576	0.652003	NO		15	7	11	15	0	0.134301	19	0	0.257158	0.195729	NO		4	4	4	20	0	0.556393	12	0	0.304855	0.430624	NO		2	15	8.5	13	0	0.159478	12
chr1_60_Pseudo_TAA-	NMTRL-TAA3-1	chr1:238106956-238107030	chr1	238106956	238107030	II	4	11	7.5	9	0	0.0565835	11	0	0.128733	0.0926584	NO		5	9	7	12	0	0.182864	9	0	0.0759489	0.129406	NO		3	0	1.5	14	0	0.482152	8	0	0.270648	0.3764	NO		8	8	8	9	0	0.0374747	14
chr1_58_tRNALeu_CAA_I+	TRL-CAA4-1	chr1:249168054-249168159	chr1	249168054	249168159	II	117	93	105	17049	0	6.98312	20775	0	7.26783	7.12547	O		95	89	92	10855	0	6.47932	8746	0	6.16861	6.32396	O		40	48	44	13374	0	7.50092	15913	0	7.75118	7.62605	O		89	110	99.5	7134	0	5.78974	7913
chr1_59_tRNAGlu_CTC+	TRE-CTC2-1	chr1:249168447-249168518	chr1	249168447	249168518	II	5	4	4.5	8709	0	7.98473	11379	0	8.36936	8.17704	O		42	43	42.5	5602	0	6.27952	4900	0	6.08746	6.18349	O		25	1	13	7495	0	7.45121	9326	0	7.76541	7.60831	O		33	68	50.5	3853	0	5.59204	4443
chr2_1_Pseudo_CCC+	TRG-CCC7-1	chr2:11691827-11691898	chr2	11691827	11691898	II	25	30	27.5	204	0	2.02487	217	0	2.10288	2.06388	O		37	37	37	65	0	0.503766	72	0	0.606336	0.555051	NO		41	37	39	121	0	1.12988	107	0	0.989508	1.05969	NO		28	34	31	82	0	0.876618	96
chr2_2_tRNATyr_GTA_I+	TRY-GTA2-1	chr2:27273650-27273738	chr2	27273650	27273738	II	63	55	59	19235	0	7.75796	24074	0	8.08125	7.91961	O		60	53	56.5	13959	0	7.33738	13822	0	7.32318	7.33028	O		51	50	50.5	16695	0	7.6988	20822	0	8.01698	7.85789	O		47	49	48	11232	0	7.17377	13333
chr2_3_tRNAAla_AGC+	TRA-AGC8-1	chr2:27274082-27274154	chr2	27274082	27274154	II	99	83	91	18721	0	7.27582	23021	0	7.57368	7.42475	O		139	64	101.5	15032	0	6.83971	14006	0	6.73793	6.78882	O		142	74	108	16089	0	6.86795	20593	0	7.22344	7.0457	O		63	105	84	10556	0	6.53698	13314
chr2_4_tRNALeu_AAG+	TRL-AAG5-1	chr2:30277568-30277640	chr2	30277568	30277640	II	49	19	34	35	0	0.0223678	35	0	0.0223678	0.0223678	NO		29	49	39	27	0	-0.275634	41	0	0.0412227	-0.117206	NO		41	52	46.5	51	0	0.0824622	45	0	-0.0285692	0.0269465	NO		70	75	72.5	40	0	-0.550197	39
chr2_5_tRNAIle_TAT_I+	TRI-TAT2-1	chr2:43037676-43037768	chr2	43037676	43037768	II	36	29	32.5	13624	0	7.77125	17476	0	8.12978	7.95051	O		30	37	33.5	9811	0	7.2759	7911	0	6.96642	7.12116	O		19	83	51	11260	0	7.12291	13343	0	7.36719	7.24505	O		98	92	95	6457	0	5.69755	7280
chr2_28_Pseudo_TTG-	TRQ-TTG5-1	chr2:45937441-45937513	chr2	45937441	45937513	II	79	23	51	32	0	-0.385654	38	0	-0.252387	-0.31902	NO		46	44	45	29	0	-0.346176	27	0	-0.395929	-0.371052	NO		15	35	25	35	0	0.241008	26	0	0.0259952	0.133502	NO		34	58	46	24	0	-0.49304	39
AluY_SINE_Alu_62819118	N/A	chr2:62819118-62819430	chr2	62819118	62819430	II	22	44	33	26	0	-0.169925	31	0	-0.0465426	-0.108234	NO		13	86	49.5	26	0	-0.505528	26	0	-0.505528	-0.505528	NO		23	39	31	33	0	0.0465426	22	0	-0.230298	-0.0918775	NO		22	16	19	26	0	0.192645	16
chr2_27_tRNAGly_CCC-	TRG-CCC2-1	chr2:70476123-70476193	chr2	70476123	70476193	II	18	9	13.5	8119	0	7.54946	9136	0	7.71913	7.6343	O		24	13	18.5	5587	0	6.85567	5308	0	6.78217	6.81892	O		8	27	17.5	8054	0	7.411	6893	0	7.18733	7.29916	O		16	31	23.5	5089	0	6.58018	5103
chr2_26_Pseudo_???-	TRU-NNN9-1	chr2:70663957-70664027	chr2	70663957	70664027	II	6	23	14.5	24	0	0.279154	27	0	0.357157	0.318155	NO		17	32	24.5	22	0	-0.0677446	16	0	-0.244622	-0.156183	NO		18	29	23.5	28	0	0.116514	28	0	0.116514	0.116514	NO		23	17	20	33	0	0.333424	21
chr2_25_Pseudo_CTC-	TRE-CTC15-1	chr2:71273488-71273560	chr2	71273488	71273560	II	49	37	43	66	0	0.395138	85	0	0.655665	0.525402	NO		75	70	72.5	41	0	-0.529733	53	0	-0.304441	-0.417087	NO		21	41	31	60	0	0.561116	47	0	0.336049	0.448582	NO		66	80	73	44	0	-0.477047	60
chr2_6_tRNAGlu_TTC+	TRE-TTC13-1	chr2:75124046-75124114	chr2	75124046	75124114	II	1	8	4.5	24	0	0.646363	26	0	0.69883	0.672597	NO		5	4	4.5	22	0	0.591915	25	0	0.672835	0.632375	NO		40	2	21	30	0	0.234465	24	0	0.0824622	0.158464	NO		19	25	22	19	0	-0.0857299	18
chr2_7_Pseudo_AGG+	TRP-AGG5-1	chr2:77895593-77895663	chr2	77895593	77895663	II	8	11	9.5	6	53.84	-0.133856	4	77.77	-0.216318	-0.175087	NO		12	11	11.5	7	60	-0.165586	4	100	-0.287577	-0.226581	NO		3	6	4.5	16	60	0.415037	8	17.64	0.139403	0.27722	NO		2	7	4.5	12	57.14	0.283793	15
chr2_8_Pseudo_AGG+	TRP-AGG4-1	chr2:87339573-87339644	chr2	87339573	87339644	II	24	22	23	12	64.38	-0.335603	18	43.63	-0.142958	-0.23928	NO		14	35	24.5	16	48.62	-0.244622	14	53.21	-0.308753	-0.276688	NO		13	25	19	16	45.49	-0.0911479	15	36.49	-0.122857	-0.107002	NO		11	35	23	15	48.12	-0.236067	12
chr2_24_Pseudo_CTC-	TRE-CTC13-1	chr2:96217194-96217265	chr2	96217194	96217265	II	53	72	62.5	129	1.07	0.781501	129	2.41	0.781501	0.781501	NO		42	115	78.5	55	0.93	-0.35216	50	2.19	-0.439623	-0.395892	NO		46	66	56	58	0.78	0.0331669	46	1.07	-0.178337	-0.0725852	NO		80	57	68.5	84	1.89	0.210838	76
chr2_9_Pseudo_TAA+	NMTRL-TAA2-1	chr2:117781417-117781491	chr2	117781417	117781491	II	35	11	23	22	0	-0.0274807	28	0	0.130061	0.0512899	NO		53	13	33	34	0	0.0227201	23	0	-0.249359	-0.11332	NO		23	8	15.5	34	0	0.492205	38	0	0.579668	0.535937	NO		27	21	24	34	0	0.245112	22
chr2_23_tRNAGln_TTG-	NMTRQ-TTG3-1	chr2:117782509-117782580	chr2	117782509	117782580	II	5	9	7	13	0	0.216811	14	0	0.249978	0.233395	NO		9	0	4.5	12	0	0.283793	8	0	0.139403	0.211598	NO		3	16	9.5	13	0	0.122484	16	0	0.219781	0.171133	NO		2	24	13	13	0	0	12
chr2_22_Pseudo_TTG-	NMTRQ-TTG7-1	chr2:131029911-131029982	chr2	131029911	131029982	II	18	17	17.5	20	0	0.0740006	34	0	0.430144	0.252072	NO		7	18	12.5	29	0	0.473252	16	0	0.114171	0.293712	NO		0	6	3	26	0	0.762961	21	0	0.628031	0.695496	NO		9	5	7	25	0	0.571906	12
chr2_21_tRNASer_TGA-	NMTRS-TGA1-1	chr2:131033024-131033093	chr2	131033024	131033093	II	14	2	8	16	0	0.275634	15	0	0.243926	0.25978	NO		13	7	10	19	0	0.292782	18	0	0.263034	0.277908	NO		13	2	7.5	20	0	0.415037	25	1.96	0.552541	0.483789	NO		19	1	10	26	1.63	0.485427	20
chr2_20_tRNAGlu_TTC-	TRE-TTC1-1	chr2:131094701-131094772	chr2	131094701	131094772	II	61	53	57	9767	0	6.81518	11674	0	7.07177	6.94348	O		65	40	52.5	7711	0	6.55198	7268	0	6.46696	6.50947	O		142	56	99	8084	0	5.97497	10087	0	6.29327	6.13412	O		99	76	87.5	5450	0	5.54344	6267
chr2_10_Pseudo_TGA+	NMTRS-TGA2-1	chr2:132140142-132140211	chr2	132140142	132140211	II	14	17	15.5	13	0	-0.0815299	13	0	-0.0815299	-0.0815299	NO		4	4	4	12	0	0.304855	15	0	0.40439	0.354622	NO		4	14	9	23	0	0.442518	18	2.7	0.29956	0.371039	NO		5	25	15	23	1.88	0.236067	15
chr2_11_Pseudo_TTG+	NMTRQ-TTG9-1	chr2:132143133-132143204	chr2	132143133	132143204	II	17	33	25	30	0	0.125531	19	0	-0.16665	-0.0205595	NO		33	10	21.5	22	0	0.0139392	29	0	0.196143	0.105041	NO		42	5	23.5	22	0	-0.0410273	21	0	-0.0690416	-0.0550345	NO		8	24	16	23	0	0.204358	20
hsa-mir-1978	N/A	chr2:149639365-149639417	chr2	149639365	149639417	other	482	404	443	107	0	-1.78766	136	0	-1.51066	-1.64916	NO		458	418	438	231	0	-0.842459	208	0	-0.975547	-0.909003	NO		406	383	394.5	85	0	-1.88413	92	0	-1.79888	-1.84151	NO		543	330	436.5	70	0	-2.22188	132
chr2_12_Pseudo_CTC+	TRE-CTC9-1	chr2:151219277-151219349	chr2	151219277	151219349	II	6	25	15.5	37	0	0.558295	33	0	0.469485	0.51389	NO		24	10	17	25	0	0.226771	32	0	0.399607	0.313189	NO		5	12	8.5	29	0	0.615857	33	0	0.710493	0.663175	NO		15	50	32.5	25	0	-0.184425	33
chr2_13_tRNAAla_CGC+	TRA-CGC3-1	chr2:157257281-157257352	chr2	157257281	157257352	II	40	20	30	8549	0	7.1597	9039	0	7.23984	7.19977	O		7	16	11.5	5041	0	6.93302	5128	0	6.95756	6.94529	O		14	75	44.5	8982	0	6.91846	7861	0	6.72682	6.82264	O		46	68	57	4748	0	5.77925	4978
chr2_19_tRNAGly_GCC-	TRG-GCC2-2	chr2:157257659-157257729	chr2	157257659	157257729	II	37	28	32.5	7679	0	6.94654	7896	0	6.98659	6.96657	O		2	21	11.5	4967	0	6.91181	4762	0	6.85137	6.88159	O		10	66	38	8162	0	6.91254	7040	0	6.70003	6.80628	O		9	55	32	5017	0	6.34701	5040
chr2_18_Pseudo_CTC-	TRE-CTC7-1	chr2:159738171-159738242	chr2	159738171	159738242	II	62	18	40	57	0.8	0.31366	61	0.85	0.378512	0.346086	NO		116	52	84	42	3.7	-0.662965	44	1.07	-0.623437	-0.643201	NO		36	51	43.5	61	1.51	0.308122	50	4.95	0.122256	0.215189	NO		78	58	68	46	0.93	-0.366782	36
chr2_17_Pseudo_TTC-	TRE-TTC9-1	chr2:204229131-204229201	chr2	204229131	204229201	II	25	34	29.5	57	0	0.548126	36	0	0.149576	0.348851	NO		35	20	27.5	22	0	-0.14505	27	0	-0.0126	-0.0788252	NO		7	20	13.5	45	0	0.785875	51	0	0.896907	0.841391	NO		18	47	32.5	33	0	0.0114956	42
chr2_14_tRNATyr_ATA_I+	TRY-ATA1-1	chr2:219110549-219110641	chr2	219110549	219110641	II	50	69	59.5	37	0	-0.417727	45	0	-0.254997	-0.336362	NO		50	53	51.5	44	0	-0.139275	41	0	-0.198981	-0.169128	NO		65	58	61.5	33	0	-0.53842	40	0	-0.386417	-0.462418	NO		23	38	30.5	33	0	0.0584167	49
chr2_15_Pseudo_CTG+	TRQ-CTG16-1	chr2:219491132-219491207	chr2	219491132	219491207	II	65	46	55.5	68	0	0.196857	72	0	0.254573	0.225715	NO		61	115	88	40	0	-0.75336	55	0	-0.473252	-0.613306	NO		60	29	44.5	65	0	0.350687	73	0	0.467332	0.40901	NO		30	58	44	59	0	0.26628	64
chr2_16_Pseudo_TTT-	TRK-TTT15-1	chr2:224186315-224186387	chr2	224186315	224186387	II	35	18	26.5	23	0	-0.0922585	35	0	0.202189	0.0549652	NO		55	50	52.5	36	0	-0.321928	34	0	-0.366322	-0.344125	NO		33	18	25.5	43	0	0.395409	29	0	0.0882272	0.241818	NO		32	28	30	34	0	0.0931094	29
chr3_1_Pseudo_CTA+	TR*-CTA2-1	chr3:13833886-13833953	chr3	13833886	13833953	II	66	30	48	48	0	0	48	0	0	0	NO		60	106	83	61	0	-0.312384	54	0	-0.427862	-0.370123	NO		86	58	72	57	0	-0.229482	77	0	0.0690416	-0.0802201	NO		55	54	54.5	76	0	0.327041	82
chr3_12_Pseudo_GCA-	TRC-GCA25-1	chr3:17741392-17741464	chr3	17741392	17741464	II	7	48	27.5	12	5.33	-0.453173	19	3.22	-0.23078	-0.341976	NO		7	7	7	9	2.17	0.0759489	8	4.25	0.0384741	0.0572115	NO		14	15	14.5	25	2.99	0.305626	12	4	-0.083416	0.111105	NO		8	1	4.5	18	4	0.476438	17
chr3_11_tRNAArg_ACG-	TRR-ACG2-1	chr3:45730491-45730563	chr3	45730491	45730563	II	64	78	71	13902	0	7.1079	17870	0	7.46946	7.28868	O		59	55	57	11806	0	7.08795	9703	0	6.80573	6.94684	O		81	56	68.5	13334	0	7.08401	15491	0	7.29988	7.19195	O		56	95	75.5	8601	0	6.35421	10169
chr3_10_Pseudo_CTC-	TRE-CTC12-1	chr3:103879524-103879595	chr3	103879524	103879595	II	5	17	11	6	0	-0.187627	10	0	-0.0356239	-0.111625	NO		3	10	6.5	11	0	0.167727	15	0	0.302029	0.234878	NO		3	13	8	10	0	0.0740006	8	0	0	0.0370003	NO		2	16	9	10	0	0.0365259	15
chr3_9_Pseudo_TTG-	NMTRQ-TTG4-1	chr3:106620878-106620949	chr3	106620878	106620949	II	17	39	28	18	0	-0.273018	23	0	-0.130061	-0.20154	NO		1	12	6.5	22	0	0.510615	11	0	0.167727	0.339171	NO		29	8	18.5	23	0	0.128008	19	0	0.014797	0.0714023	NO		12	6	9	23	0	0.442518	13
chr3_8_tRNAGlu_CTC-	TRE-CTC8-1	chr3:125413177-125413248	chr3	125413177	125413248	II	33	39	36	72	0.63	0.628031	65	0.8	0.525461	0.576746	NO		43	46	44.5	54	2.85	0.173149	57	0.82	0.223775	0.198462	NO		72	44	58	50	1.85	-0.137504	72	3.44	0.212994	0.0377451	NO		65	73	69	52	0.82	-0.271805	66
chr3_7_tRNACys_GCA-	TRC-GCA6-1	chr3:131947944-131948015	chr3	131947944	131948015	II	23	28	25.5	238	0	2.27167	298	0	2.56314	2.4174	O		12	3	7.5	89	0	1.666	115	0	1.95109	1.80854	O		6	14	10	113	0	1.83794	143	0	2.1127	1.97532	O		3	24	13.5	92	0	1.48779	103
chr3_6_tRNACys_GCA-	TRC-GCA9-1	chr3:131950642-131950713	chr3	131950642	131950713	II	19	25	22	1230	0	4.59877	1421	0	4.80239	4.70058	O		29	21	25	409	0	2.99672	419	0	3.02921	3.01296	O		9	39	24	657	0	3.66928	590	0	3.52124	3.59526	O		18	46	32	450	0	2.95269	421
chr3_5_tRNALeu_AAG-	TRL-AAG8-1	chr3:148221228-148221309	chr3	148221228	148221309	II	4	9	6.5	12	0	0.202493	30	0	0.717066	0.459779	NO		4	84	44	40	0	-0.0801703	24	0	-0.454566	-0.267368	NO		25	31	28	26	0	-0.0506261	28	0	0	-0.025313	NO		61	31	46	21	0	-0.575502	26
chr3_4_tRNAHis_GTG-	TRH-GTG3-1	chr3:148316563-148316634	chr3	148316563	148316634	II	15	16	15.5	12	0	-0.115477	10	0	-0.185867	-0.150672	NO		82	4	43	20	0	-0.545968	18	0	-0.604862	-0.575415	NO		10	2	6	19	0	0.444785	6	0	0	0.222392	NO		10	2	6	18	0	0.415037	25
chr3_2_tRNAVal_AAC+	TRV-AAC1-1	chr3:169490018-169490090	chr3	169490018	169490090	II	11	7	9	2859	0	6.21095	2814	0	6.1883	6.19963	O		2	13	7.5	1653	0	5.488	1699	0	5.5269	5.50745	O		16	20	18	2770	0	5.86625	2239	0	5.56288	5.71456	O		3	8	5.5	1950	0	5.80154	1830
5S_rRNA-related_7	RN5S@	chr3:179879672-179879765	chr3	179879672	179879765	I	40	38	39	44	0	0.100929	45	0	0.120294	0.110612	NO		27	35	31	41	0	0.21901	32	0	0.023459	0.121234	NO		39	12	25.5	62	0	0.729146	48	0	0.490986	0.610066	NO		41	17	29	39	0	0.225881	47
RN5S_12	RN5S@	chr3:181540492-181540892	chr3	181540492	181540892	I	52	50	51	44	0	-0.130397	59	0	0.135883	0.0027434	NO		62	15	38.5	49	0	0.205749	73	0	0.588468	0.397109	NO		72	44	58	57	0	-0.0164881	64	0	0.0951572	0.0393346	NO		59	68	63.5	57	0	-0.103951	58
chr3_3_tRNAAsp_GTC-	TRD-GTC6-1	chr3:184366095-184366165	chr3	184366095	184366165	II	50	61	55.5	35	0	-0.395485	47	0	-0.151066	-0.273275	NO		53	43	48	53	0	0.0896372	43	0	-0.0955777	-0.00297022	NO		70	44	57	42	0	-0.273018	41	0	-0.293196	-0.283107	NO		56	43	49.5	45	0	-0.0840643	50
FLAM_C_SINE_Alu	N/A	chr3:195871503-195871903	chr3	195871503	195871903	II	111	57	84	2465	0	4.45193	2646	0	4.55297	4.50245	O		94	83	88.5	504	0	2.17195	378	0	1.78368	1.97782	O		90	73	81.5	514	0	2.28656	540	0	2.35392	2.32024	O		46	99	72.5	383	0	2.01052	450
chr4_5_Pseudo_TTA-	TR*-TTA3-1	chr4:7325838-7325909	chr4	7325838	7325909	II	99	30	64.5	124	0	0.704544	102	0	0.482152	0.593348	NO		74	121	97.5	77	0	-0.252886	73	0	-0.307853	-0.28037	NO		101	58	79.5	143	0	0.659841	159	0	0.787455	0.723648	NO		74	137	105.5	79	0	-0.313965	95
chr4_4_tRNAGln_TTG-	TRQ-TTG6-1	chr4:40908743-40908815	chr4	40908743	40908815	II	9	7	8	41	0	0.90182	36	0	0.796467	0.849143	NO		48	6	27	33	0	0.14439	19	0	-0.21818	-0.0368951	NO		15	27	21	26	0	0.13493	31	0	0.258312	0.196621	NO		10	15	12.5	23	0	0.31853	28
GABRB1_Intronic(AluSp)	N/A	chr4:47121394-47121819	chr4	47121394	47121819	II	8	13	10.5	559	0	3.86227	776	0	4.31479	4.08853	O		35	7	21	356	0	2.92003	291	0	2.654	2.78702	O		19	47	33	851	0	3.80572	905	0	3.89154	3.84863	O		12	28	20	243	0	2.4489	282
LNX1_Intronic(Alu_FLAM_C)	N/A	chr4:54345254-54345404	chr4	54345254	54345404	II	49	45	47	1400	0	4.21501	1394	0	4.20895	4.21198	O		14	32	23	544	0	3.43699	436	0	3.13627	3.28663	O		19	59	39	640	0	3.27949	583	0	3.15122	3.21536	O		15	45	30	406	0	2.86129	403
chr4_3_tRNACys_GCA-	TRC-GCA2-1	chr4:124430005-124430076	chr4	124430005	124430076	II	56	50	53	331	0	2.12082	393	0	2.34947	2.23515	O		54	69	61.5	100	0	0.506668	92	0	0.415037	0.460853	NO		15	46	30.5	225	0	2.07549	164	0	1.68105	1.87827	O		22	54	38	98	0	0.912537	75
MIRb_SINE_MIR_146808377	N/A	chr4:146808377-146808458	chr4	146808377	146808458	II	20	37	28.5	1172	0	4.36086	1422	0	4.63346	4.49716	O		58	43	50.5	676	0	3.13261	648	0	3.07422	3.10342	O		35	36	35.5	1065	0	4.06329	1107	0	4.11759	4.09044	O		31	8	19.5	524	0	3.48439	579
chr4_1_Pseudo_TTG+	NMTRQ-TTG15-1	chr4:156383888-156383959	chr4	156383888	156383959	II	0	13	6.5	3	0	-0.14543	19	0	0.424885	0.139727	NO		4	3	3.5	21	0	0.606336	17	0	0.4885	0.547418	NO		3	25	14	20	0	0.184425	18	0	0.125531	0.154978	NO		9	8	8.5	27	0	0.566103	21
chr4_2_tRNALeu_TAA-	NMTRL-TAA1-1	chr4:156384978-156385052	chr4	156384978	156385052	II	14	8	11	20	0	0.286304	19	0	0.257158	0.271731	NO		46	0	23	27	0	0.10497	29	0	0.154723	0.129846	NO		23	35	29	37	0	0.183446	29	0	0	0.0917231	NO		18	12	15	34	0	0.508147	35
chr5_24_tRNALys_CTT-	TRK-CTT9-1	chr5:26198539-26198611	chr5	26198539	26198611	II	2	43	22.5	11	0	-0.356694	10	0	-0.392317	-0.374505	NO		8	9	8.5	19	0	0.347923	14	0	0.192645	0.270284	NO		10	4	7	17	0	0.345135	13	0	0.216811	0.280973	NO		1	17	9	9	0	0	16
chr5_23_Pseudo_TTG-	TRQ-TTG7-1	chr5:77318776-77318848	chr5	77318776	77318848	II	20	12	16	29	0	0.359081	18	0	0.0614005	0.210241	NO		13	20	16.5	19	0	0.075551	31	0	0.391579	0.233565	NO		15	14	14.5	26	0	0.331621	31	0	0.455004	0.393313	NO		2	21	11.5	19	0	0.23967	26
HVG2_hsa-mir-886	N/A	chr5:135416177-135416297	chr5	135416177	135416297	II	95	112	103.5	16085	0	6.91542	17655	0	7.04954	6.98248	O		105	115	110	9424	0	6.07743	7727	0	5.792	5.93471	O		145	113	129	11894	0	6.2287	12735	0	6.32702	6.27786	O		191	133	162	6242	0	5.02975	6956
VTRNA1-1	VTRNA1-1	chr5:140090860-140090958	chr5	140090860	140090958	II	36	38	37	10307	0	7.26944	9776	0	7.19336	7.2314	O		19	49	34	4860	0	6.25562	4233	0	6.05765	6.15664	O		60	112	86	8695	0	6.23296	6424	0	5.798	6.01548	O		45	30	37.5	4537	0	6.08022	4445
VTRNA1-2	VTRNA1-2	chr5:140098510-140098598	chr5	140098510	140098598	II	48	48	48	13330	0	7.42023	14725	0	7.56351	7.49187	O		21	38	29.5	9397	0	7.30777	8063	0	7.08764	7.1977	O		30	66	48	11772	0	7.24134	12091	0	7.27982	7.26058	O		40	60	50	8133	0	6.67296	8816
VTRNA1-3	VTRNA1-3	chr5:140105743-140105831	chr5	140105743	140105831	II	35	46	40.5	11072	0	7.29898	12834	0	7.5115	7.40524	O		21	69	45	4671	0	5.96993	4042	0	5.7627	5.86632	O		41	36	38.5	8269	0	6.92069	7366	0	6.7545	6.83759	O		33	54	43.5	3276	0	5.4912	3308
chr5_22_tRNAAsp_GTC-	TRD-GTC5-1	chr5:141773988-141774059	chr5	141773988	141774059	II	25	7	16	12	0	-0.131245	10	0	-0.201634	-0.166439	NO		26	15	20.5	13	0	-0.231947	20	0	-0.0143553	-0.123151	NO		36	29	32.5	20	0	-0.321928	13	0	-0.53952	-0.430724	NO		74	35	54.5	16	0	-0.877317	19
chr5_21_Pseudo_CTG-	TRQ-CTG13-1	chr5:151248074-151248145	chr5	151248074	151248145	II	41	46	43.5	44	0	0.00978102	51	0	0.140178	0.0749793	NO		13	91	52	37	0	-0.291463	39	0	-0.249028	-0.270245	NO		62	36	49	44	0	-0.0943274	47	0	-0.0369942	-0.0656608	NO		13	25	19	44	0	0.594744	45
chr5_1_Pseudo_ACA_I+	TRC-ACA1-1	chr5:151988596-151988771	chr5	151988596	151988771	II	4	53	28.5	20	0	-0.226509	25	0	-0.089005	-0.157757	NO		23	30	26.5	16	0	-0.296617	23	0	-0.0922585	-0.194438	NO		19	27	23	17	0	-0.173332	28	0	0.130061	-0.0216355	NO		1	24	12.5	27	0	0.423499	18
chr5_20_tRNALeu_CAG-	TRL-CAG3-1	chr5:159392041-159392118	chr5	159392041	159392118	II	93	43	68	81	0	0.179706	70	0	0.0291463	0.104426	NO		84	70	77	79	0	0.0267173	62	0	-0.217905	-0.0955938	NO		94	69	81.5	65	0	-0.231044	89	0	0.0939179	-0.0685632	NO		192	27	109.5	64	0	-0.569532	80
chr5_2_tRNAVal_CAC+	TRV-CAC1-2	chr5:180524070-180524142	chr5	180524070	180524142	II	65	62	63.5	5760	100	5.95245	6873	100	6.20611	6.07928	O		51	71	61	1034	100	3.54749	984	100	3.47805	3.51277	O		42	50	46	2591	100	5.10797	2485	100	5.04842	5.07819	O		39	38	38.5	637	100	3.28351	661
chr5_19_tRNALeu_AAG-	TRL-AAG1-1	chr5:180524474-180524555	chr5	180524474	180524555	II	105	53	79	3457	100	4.99959	4048	100	5.22546	5.11252	O		69	87	78	581	100	2.50014	601	100	2.54661	2.52337	O		54	57	55.5	1632	100	4.28085	1561	100	4.21787	4.24936	O		47	79	63	372	100	2.11189	387
chr5_3_tRNALeu_AAG+	TRL-AAG1-2	chr5:180528840-180528921	chr5	180528840	180528921	II	110	57	83.5	4913	100	5.44462	5860	100	5.6975	5.57106	O		77	99	88	859	100	2.9134	841	100	2.88389	2.89864	O		50	63	56.5	2236	100	4.7113	2194	100	4.68431	4.69781	O		45	77	61	531	100	2.62406	547
chr5_18_tRNAVal_CAC-	TRV-CAC1-3	chr5:180529253-180529325	chr5	180529253	180529325	II	55	64	59.5	4904	100	5.78473	5905	100	6.05122	5.91797	O		49	83	66	898	100	3.27302	846	100	3.18982	3.23142	O		35	44	39.5	2188	100	4.9961	2126	100	4.9552	4.97565	O		31	30	30.5	558	100	3.28081	570
chr5_4_tRNAVal_AAC+	TRV-AAC1-2	chr5:180591154-180591226	chr5	180591154	180591226	II	50	50	50	4294	28.97	5.75622	4573	31.39	5.84643	5.80133	O		16	37	26.5	1199	33.1	4.44309	1145	36.47	4.37827	4.41068	O		46	18	32	2800	34.06	5.51239	2686	31.62	5.45307	5.48273	O		55	46	50.5	964	33.45	3.62619	1053
chr5_17_Pseudo_AAG-	TRL-AAG7-1	chr5:180591564-180591645	chr5	180591564	180591645	II	56	67	61.5	1844	0	4.35621	1969	0	4.44936	4.40278	O		27	60	43.5	451	0	2.71022	425	0	2.63005	2.67014	O		64	37	50.5	1310	0	4.0571	1249	0	3.98988	4.02349	O		135	77	106	414	0	1.70695	421
chr5_5_tRNAVal_AAC+	TRV-AAC1-3	chr5:180596610-180596682	chr5	180596610	180596682	II	50	67	58.5	8804	14.91	6.64125	9352	16.17	6.72807	6.68466	O		67	100	83.5	2829	14.03	4.65475	2546	16.41	4.50437	4.57956	O		46	62	54	6445	15.03	6.26835	5696	14.96	6.09099	6.17967	O		87	91	89	2073	15.56	4.14342	2173
chr5_6_tRNAVal_CAC+	TRV-CAC1-4	chr5:180600650-180600722	chr5	180600650	180600722	II	30	66	48	3685	0	5.57374	4362	0	5.81526	5.6945	O		61	46	53.5	816	0	3.34081	748	0	3.21992	3.28037	O		58	39	48.5	2097	0	4.75998	2119	0	4.77483	4.76741	O		52	35	43.5	569	0	3.02674	628
chr5_16_tRNALeu_AAG-	TRL-AAG1-3	chr5:180601044-180601125	chr5	180601044	180601125	II	102	96	99	1329	0	3.3971	1390	0	3.46045	3.42878	O		29	100	64.5	262	0	1.62758	220	0	1.40354	1.51556	NO		65	66	65.5	809	0	3.1351	757	0	3.04279	3.08894	O		115	96	105.5	208	0	0.812669	217
chr5_7_tRNALeu_AAG+	TRL-AAG2-1	chr5:180614701-180614782	chr5	180614701	180614782	II	79	44	61.5	14762	0	7.33683	16269	0	7.4768	7.40681	O		39	109	74	5255	0	5.66725	4380	0	5.40612	5.53669	O		66	83	74.5	10782	0	6.69299	11367	0	6.76901	6.731	O		67	103	85	3170	0	4.79837	3572
chr5_15_tRNAVal_AAC-	TRV-AAC2-1	chr5:180615416-180615488	chr5	180615416	180615488	II	82	32	57	9019	0	6.7006	11974	0	7.10828	6.90444	O		43	44	43.5	5658	0	6.27403	4412	0	5.91732	6.09568	O		21	51	36	8403	0	6.99744	9482	0	7.17114	7.08429	O		89	34	61.5	4022	0	5.46872	4502
chr5_14_tRNAPro_TGG-	TRP-TGG3-1	chr5:180615854-180615925	chr5	180615854	180615925	II	77	32	54.5	6762	0	6.32874	7427	0	6.4635	6.39612	O		53	63	58	3892	0	5.47794	3502	0	5.32684	5.40239	O		31	58	44.5	6056	0	6.35211	5813	0	6.29333	6.32272	O		96	43	69.5	3416	0	5.11408	3649
chr5_13_tRNAThr_TGT-	TRT-TGT6-1	chr5:180618687-180618758	chr5	180618687	180618758	II	22	40	31	7887	0	7.02	8322	0	7.09717	7.05858	O		10	38	24	3738	0	6.1247	2778	0	5.70044	5.91257	O		14	32	23	7205	0	7.09286	5152	0	6.61137	6.85211	O		9	31	20	3640	0	6.19771	3245
chr5_8_tRNAAla_TGC+	TRA-TGC3-1	chr5:180633868-180633939	chr5	180633868	180633939	II	76	57	66.5	11909	0	6.95094	14516	0	7.23588	7.09341	O		48	70	59	8775	0	6.62837	7375	0	6.37855	6.50346	O		52	71	61.5	10661	0	6.86841	11255	0	6.94642	6.90741	O		56	47	51.5	6257	0	6.26943	6775
chr5_9_tRNALys_CTT+	TRK-CTT2-2	chr5:180634755-180634827	chr5	180634755	180634827	II	32	45	38.5	9036	0	7.04822	10127	0	7.21215	7.13019	O		54	83	68.5	3866	0	5.30573	3594	0	5.20132	5.25352	O		49	73	61	7559	0	6.3819	7436	0	6.35833	6.37011	O		62	28	45	2992	0	5.33247	2860
chr5_12_tRNAVal_AAC-	TRV-AAC1-4	chr5:180645270-180645342	chr5	180645270	180645342	II	65	11	38	6065	0	6.48595	7005	0	6.69287	6.58941	O		32	21	26.5	2614	0	5.54833	2280	0	5.3535	5.45091	O		41	33	37	5433	0	6.34939	5470	0	6.35913	6.35426	O		38	50	44	1960	0	4.7491	2275
chr5_11_tRNALys_CTT-	TRK-CTT2-3	chr5:180648979-180649051	chr5	180648979	180649051	II	75	33	54	14727	0	7.45679	17403	0	7.69722	7.57701	O		62	55	58.5	6696	0	6.24793	5937	0	6.07518	6.16156	O		36	58	47	12227	0	7.31453	13540	0	7.46135	7.38794	O		120	83	101.5	4416	0	5.07937	5880
chr5_10_tRNAVal_CAC-	TRV-CAC1-5	chr5:180649395-180649467	chr5	180649395	180649467	II	60	76	68	14617	0	7.22361	16983	0	7.43964	7.33162	O		67	101	84	7634	0	6.07099	6383	0	5.81389	5.94244	O		85	85	85	12795	0	6.80118	13105	0	6.83564	6.81841	O		130	83	106.5	5530	0	5.34811	6662
chr6_1_tRNAGln_CTG+	TRQ-CTG1-1	chr6:18836402-18836473	chr6	18836402	18836473	II	0	8	4	117	0	2.11221	118	0	2.12199	2.1171	O		4	40	22	32	0	0.253757	37	0	0.365649	0.309703	NO		17	17	17	56	0	0.871676	41	0	0.595158	0.733417	NO		5	32	18.5	26	0	0.207442	34
chr6_2_tRNAMet_CAT+	TRX-CAT1-2	chr6:26286754-26286825	chr6	26286754	26286825	II	2	27	14.5	3702	0	6.39	3721	0	6.39733	6.39366	O		1	6	3.5	2060	0	5.9632	2033	0	5.94444	5.95382	O		8	10	9	3672	0	6.56869	2887	0	6.22487	6.39678	O		0	23	11.5	1801	0	5.46338	1813
chr6_3_tRNAArg_TCG+	TRR-TCG4-1	chr6:26299905-26299977	chr6	26299905	26299977	II	29	7	18	554	0	3.60486	604	0	3.72338	3.66412	O		64	0	32	67	0	0.645717	75	0	0.760049	0.702883	NO		24	16	20	182	0	2.08406	153	0	1.87184	1.97795	O		8	8	8	44	0	0.961526	49
chr6_175_tRNASer_GCT-	TRS-GCT6-1	chr6:26305718-26305801	chr6	26305718	26305801	II	19	14	16.5	9504	0	7.67971	11734	0	7.98293	7.83132	O		12	23	17.5	2709	0	5.84958	2443	0	5.70219	5.77588	O		39	28	33.5	6664	0	6.71997	7219	0	6.83488	6.77742	O		41	42	41.5	1618	0	4.52663	1777
chr6_174_tRNAGln_TTG-	TRQ-TTG3-1	chr6:26311424-26311495	chr6	26311424	26311495	II	37	25	31	5356	0	6.46426	6049	0	6.63888	6.55157	O		30	18	24	1253	0	4.57042	1214	0	4.52588	4.54815	O		38	13	25.5	3584	0	6.02496	3649	0	6.05068	6.03782	O		17	15	16	766	0	4.11306	832
chr6_173_tRNAGln_TTG-	TRQ-TTG3-2	chr6:26311975-26312046	chr6	26311975	26312046	II	55	67	61	5894	0	6.02456	7094	0	6.29068	6.15762	O		52	12	32	1769	0	4.85878	1759	0	4.85074	4.85476	O		15	28	21.5	4473	0	6.45017	5061	0	6.62723	6.5387	O		13	25	19	1323	0	4.78724	1482
chr6_172_tRNASer_TGA-	TRS-TGA3-1	chr6:26312824-26312905	chr6	26312824	26312905	II	0	24	12	5274	0	6.98055	6369	0	7.25131	7.11593	O		24	27	25.5	1397	0	4.68435	1396	0	4.68334	4.68385	O		16	12	14	4417	0	6.65919	3928	0	6.49112	6.57515	O		9	16	12.5	1169	0	4.81823	1143
chr6_171_tRNAMet_CAT-	TRX-CAT1-3	chr6:26313352-26313423	chr6	26313352	26313423	II	44	55	49.5	9938	0	6.97021	11311	0	7.15638	7.06329	O		42	52	47	3851	0	5.65543	3426	0	5.4881	5.57176	O		72	24	48	7547	0	6.60201	8771	0	6.81805	6.71003	O		27	23	25	2482	0	5.51326	2964
chr6_170_tRNATrp_CCA-	TRW-CCA3-1	chr6:26319330-26319401	chr6	26319330	26319401	II	10	39	24.5	1027	0	4.27758	1325	0	4.63589	4.45673	O		33	21	27	121	0	1.40551	152	0	1.6749	1.54021	NO		4	12	8	586	0	4.01886	568	0	3.97607	3.99747	O		40	21	30.5	67	0	0.68105	92
chr6_4_tRNAArg_TCG+	TRR-TCG2-1	chr6:26323046-26323118	chr6	26323046	26323118	II	27	59	43	8255	0	6.82646	9612	0	7.04529	6.93588	O		28	27	27.5	3132	0	5.78113	2990	0	5.71484	5.74799	O		99	10	54.5	6670	0	6.30907	7265	0	6.43181	6.37044	O		5	36	20.5	2498	0	5.64557	2817
chr6_5_tRNASer_AGA+	TRS-AGA2-1	chr6:26327817-26327898	chr6	26327817	26327898	II	6	8	7	6118	0	7.37645	5955	0	7.33768	7.35707	O		6	9	7.5	2324	0	5.97208	2389	0	6.01138	5.99173	O		2	24	13	5340	0	6.96444	4843	0	6.82433	6.89439	O		0	34	17	2132	0	5.52356	2217
chr6_6_tRNAArg_ACG+	TRR-ACG1-1	chr6:26328368-26328440	chr6	26328368	26328440	II	7	8	7.5	4004	0	6.74918	4381	0	6.87807	6.81362	O		15	1	8	1464	0	5.29704	1432	0	5.2658	5.28142	O		3	27	15	4087	0	6.51552	3231	0	6.17925	6.34739	O		0	10	5	1228	0	5.16763	1160
chr6_169_tRNAMet_CAT-	TRX-CAT1-4	chr6:26330529-26330600	chr6	26330529	26330600	II	3	45	24	8141	0	7.24141	8904	0	7.3702	7.30581	O		23	27	25	3209	0	5.87997	3040	0	5.80266	5.84132	O		25	1	13	6800	0	7.31141	6992	0	7.3514	7.3314	O		4	17	10.5	2573	0	6.00611	2817
chr6_168_tRNATrp_CCA-	TRW-CCA3-2	chr6:26331672-26331743	chr6	26331672	26331743	II	17	43	30	7571	0	6.98508	9750	0	7.34873	7.16691	O		24	26	25	1656	0	4.93803	1624	0	4.91038	4.92421	O		31	23	27	5033	0	6.47289	5767	0	6.6682	6.57054	O		18	62	40	857	0	3.66351	1034
chr6_7_tRNALeu_CAG+	TRL-CAG1-7	chr6:26521436-26521518	chr6	26521436	26521518	II	1	30	15.5	4492	0	6.63495	5349	0	6.88533	6.76014	O		5	13	9	3469	0	6.48732	2906	0	6.23423	6.36078	O		24	24	24	4524	0	6.39803	4518	0	6.39613	6.39708	O		13	50	31.5	2519	0	5.3732	2703
chr6_167_tRNAThr_AGT-	TRT-AGT2-1	chr6:26533145-26533218	chr6	26533145	26533218	II	48	45	46.5	11336	0	7.21505	12875	0	7.39825	7.30665	O		54	49	51.5	6287	0	6.2763	5577	0	6.10429	6.19029	O		23	48	35.5	10256	0	7.29497	9947	0	7.25097	7.27297	O		39	65	52	5095	0	5.96578	5317
chr6_8_tRNAArg_ACG+	TRR-ACG1-2	chr6:26537726-26537798	chr6	26537726	26537798	II	54	104	79	10172	0	6.54838	11963	0	6.78172	6.66505	O		42	37	39.5	3347	0	5.60259	2963	0	5.42844	5.51551	O		23	50	36.5	8236	0	6.95769	9165	0	7.11135	7.03452	O		74	46	60	2194	0	4.62709	2474
chr6_9_tRNAVal_CAC+	TRV-CAC1-6	chr6:26538282-26538354	chr6	26538282	26538354	II	22	46	34	5684	0	6.48029	6082	0	6.57743	6.52886	O		23	37	30	2798	0	5.55868	2272	0	5.26178	5.41023	O		23	79	51	4999	0	5.95621	4885	0	5.92313	5.93967	O		51	45	48	2336	0	4.92283	2461
chr6_10_tRNAAla_CGC+	TRA-CGC1-1	chr6:26553731-26553802	chr6	26553731	26553802	II	23	24	23.5	6403	0	6.90981	7589	0	7.15392	7.03186	O		7	35	21	3097	0	5.93814	2596	0	5.68623	5.81218	O		17	29	23	6015	0	6.83361	5184	0	6.62025	6.72693	O		25	49	37	2267	0	5.09945	2298
chr6_11_tRNAIle_AAT+	TRI-AAT5-1	chr6:26554350-26554423	chr6	26554350	26554423	II	51	51	51	10493	0	7.02141	11824	0	7.19324	7.10732	O		48	41	44.5	5339	0	6.17127	4959	0	6.06537	6.11832	O		66	24	45	8963	0	6.90577	9174	0	6.93923	6.9225	O		59	54	56.5	4255	0	5.63045	4732
chr6_12_tRNAPro_AGG+	TRP-AGG2-2	chr6:26555498-26555569	chr6	26555498	26555569	II	0	27	13.5	3767	0	6.4477	4334	0	6.64849	6.5481	O		39	16	27.5	1026	0	4.1989	972	0	4.12318	4.16104	O		18	2	10	3087	0	6.28401	2736	0	6.11166	6.19784	O		2	12	7	789	0	4.46827	811
chr6_13_tRNALys_CTT+	TRK-CTT2-4	chr6:26556774-26556846	chr6	26556774	26556846	II	13	19	16	6313	0	7.10739	7074	0	7.27085	7.18912	O		23	35	29	2048	0	5.13834	1881	0	5.01747	5.0779	O		19	58	38.5	5227	0	6.26199	5199	0	6.25429	6.25814	O		41	61	51	1477	0	4.21761	1585
chr6_14_tRNATyr_GTA_I+	TRY-GTA1-1	chr6:26569086-26569176	chr6	26569086	26569176	II	32	23	27.5	8921	0	7.28234	11375	0	7.63189	7.45712	O		12	33	22.5	5149	0	6.62421	4780	0	6.51758	6.57089	O		35	59	47	7629	0	6.63615	8832	0	6.84663	6.74139	O		25	49	37	3593	0	5.75688	4297
chr6_166_tRNAAla_AGC-	TRA-AGC11-1	chr6:26572092-26572164	chr6	26572092	26572164	II	34	74	54	10264	0	6.9372	13576	0	7.33964	7.13842	O		44	26	35	5019	0	6.27941	4570	0	6.14505	6.21223	O		72	69	70.5	8282	0	6.36993	10717	0	6.74059	6.55526	O		31	43	37	3531	0	5.73198	4286
chr6_15_tRNATyr_GTA_I+	TRY-GTA8-1	chr6:26575798-26575887	chr6	26575798	26575887	II	30	14	22	1271	0	4.64497	1422	0	4.80339	4.72418	O		61	32	46.5	225	0	1.73697	210	0	1.6495	1.69323	O		47	21	34	790	0	3.67948	690	0	3.49185	3.58567	O		24	39	31.5	153	0	1.57319	146
chr6_16_tRNATyr_GTA_I+	TRY-GTA3-1	chr6:26577332-26577420	chr6	26577332	26577420	II	12	23	17.5	6648	0	7.13534	7814	0	7.36752	7.25143	O		19	20	19.5	1931	0	5.30802	1849	0	5.24639	5.2772	O		12	25	18.5	5628	0	6.86616	5073	0	6.71722	6.79169	O		13	50	31.5	1213	0	4.3371	1225
chr6_17_tRNATyr_GTA_I+	TRY-GTA6-1	chr6:26595102-26595190	chr6	26595102	26595190	II	3	20	11.5	1795	0	5.45864	1861	0	5.50989	5.48427	O		7	9	8	350	0	3.32193	347	0	3.31049	3.31621	O		29	8	18.5	1242	0	4.71297	1012	0	4.42523	4.5691	O		25	28	26.5	245	0	2.28311	232
chr6_18_tRNAAla_AGC+	TRA-AGC14-1	chr6:26673590-26673662	chr6	26673590	26673662	II	101	79	90	218	22.88	1.04731	281	22.67	1.37388	1.21059	NO		137	92	114.5	114	24.2	-0.00500068	135	24.47	0.191397	0.0931979	NO		33	52	42.5	166	15.55	1.4348	183	21.4	1.5548	1.4948	NO		45	85	65	116	20.14	0.619969	138
chr6_19_tRNAAla_AGC+	TRA-AGC12-1	chr6:26682715-26682787	chr6	26682715	26682787	II	77	78	77.5	481	49.1	2.24899	560	53.88	2.45638	2.35268	O		49	95	72	116	48.8	0.517399	110	46.78	0.456858	0.487128	NO		54	86	70	234	50.62	1.40054	266	55.08	1.5656	1.48307	NO		69	104	86.5	111	54.62	0.275365	132
chr6_20_tRNAAla_AGC+	TRA-AGC10-1	chr6:26687485-26687557	chr6	26687485	26687557	II	93	115	104	426	32.1	1.7668	545	29.75	2.10133	1.93406	O		130	82	106	166	26.64	0.527247	154	32.72	0.436099	0.481673	NO		112	138	125	318	34.88	1.16682	312	38.53	1.14173	1.15427	NO		129	83	106	138	32.7	0.304855	168
chr6_21_tRNAMet_CAT+	TRM-CAT5-1	chr6:26701712-26701784	chr6	26701712	26701784	II	26	48	37	2738	0.54	5.36854	3439	0.41	5.69421	5.53138	O		48	30	39	667	0.86	3.33649	606	0.39	3.20436	3.27042	O		73	73	73	1245	0.59	3.62978	1150	0.82	3.51807	3.57393	O		83	80	81.5	502	0.08	2.25438	528
chr6_22_tRNAAla_AGC+	TRA-AGC13-1	chr6:26705606-26705678	chr6	26705606	26705678	II	110	52	81	1336	18.38	3.62133	1460	16.48	3.74668	3.684	O		101	121	111	388	16.12	1.56781	346	16.27	1.41504	1.49142	NO		140	178	159	745	17.83	2.03581	719	16.95	1.98658	2.01119	O		113	84	98.5	326	18.77	1.47011	377
chr6_165_tRNAIle_AAT-	TRI-AAT7-1	chr6:26721221-26721294	chr6	26721221	26721294	II	58	45	51.5	146	100	1.1107	145	100	1.10248	1.10659	NO		31	61	46	42	100	-0.0780025	53	100	0.127112	0.0245547	NO		45	58	51.5	97	100	0.639957	84	100	0.484162	0.562059	NO		33	43	38	42	100	0.0824622	38
chr6_23_tRNAAla_AGC+	TRA-AGC18-1	chr6:26728256-26728328	chr6	26728256	26728328	II	15	33	24	1149	100	4.44846	1468	100	4.79393	4.6212	O		27	25	26	282	100	2.47805	321	100	2.64797	2.56301	O		29	27	28	574	100	3.38042	555	100	3.33431	3.35737	O		29	35	32	238	100	2.11189	254
chr6_24_tRNAAla_AGC+	TRA-AGC9-1	chr6:26730737-26730809	chr6	26730737	26730809	II	44	43	43.5	778	100	3.45854	813	100	3.51972	3.48913	O		22	60	41	140	100	1.25964	128	100	1.15403	1.20684	NO		26	73	49.5	365	100	2.31283	328	100	2.17093	2.24188	O		52	57	54.5	110	100	0.728404	100
chr6_164_tRNAMet_CAT-	TRM-CAT4-1	chr6:26735574-26735646	chr6	26735574	26735646	II	40	39	39.5	3083	100	5.48515	3567	100	5.69364	5.58939	O		30	54	42	846	100	3.60486	820	100	3.56139	3.58313	O		31	54	42.5	1874	100	4.71491	1740	100	4.60962	4.66227	O		57	62	59.5	581	100	2.77121	619
chr6_163_tRNAIle_AAT-	TRI-AAT6-1	chr6:26745255-26745328	chr6	26745255	26745328	II	30	10	20	2899	0.53	5.87234	2902	0.45	5.87381	5.87307	O		17	65	41	621	0.46	3.19677	661	0.61	3.28279	3.23978	O		30	37	33.5	1504	0.5	4.5944	1486	0.43	4.57737	4.58588	O		14	60	37	538	0.71	3.08366	530
chr6_25_tRNAAla_AGC+	TRA-AGC21-1	chr6:26751918-26751990	chr6	26751918	26751990	II	36	50	43	664	18.79	3.24897	730	12.09	3.38003	3.3145	O		40	53	46.5	193	8.93	1.54351	154	9.95	1.26617	1.40484	NO		50	31	40.5	377	11.5	2.52933	407	8.29	2.63194	2.58064	O		103	55	79	141	14.89	0.649668	148
chr6_26_tRNAUndet_???+	TRU-NNN1-1	chr6:26752630-26752703	chr6	26752630	26752703	II	15	41	28	81	1.13	0.936435	96	1.08	1.1193	1.02787	NO		58	53	55.5	52	0.99	-0.0603005	55	2.56	-0.00846158	-0.034381	NO		104	54	79	83	2.76	0.0519946	52	4.76	-0.410632	-0.179319	NO		62	30	46	50	1.72	0.0740006	62
chr6_162_tRNAMet_CAT-	TRM-CAT4-2	chr6:26758550-26758622	chr6	26758550	26758622	II	52	26	39	2692	2.24	5.30193	2991	1.47	5.45229	5.37711	O		30	82	56	618	1.63	2.91359	527	2.21	2.69527	2.80443	O		44	63	53.5	1063	2.09	3.71037	1029	2.22	3.66478	3.68758	O		41	38	39.5	487	1.89	2.89508	510
chr6_27_tRNAMet_CAT+	TRM-CAT4-3	chr6:26766444-26766516	chr6	26766444	26766516	II	54	33	43.5	3273	100	5.48989	3714	100	5.67069	5.58029	O		35	87	61	891	100	3.33926	865	100	3.29795	3.31861	O		35	60	47.5	1992	100	4.70544	1831	100	4.58574	4.64559	O		70	75	72.5	615	100	2.65368	649
chr6_161_tRNAAla_AGC-	TRA-AGC9-2	chr6:26771290-26771362	chr6	26771290	26771362	II	46	42	44	674	100	3.24998	743	100	3.38487	3.31742	O		23	64	43.5	140	100	1.20972	120	100	1.02915	1.11943	NO		36	69	52.5	333	100	2.1375	304	100	2.01738	2.07744	O		57	53	55	102	100	0.635003	91
chr6_160_tRNAAla_AGC-	TRA-AGC18-2	chr6:26773771-26773843	chr6	26773771	26773843	II	13	30	21.5	1145	100	4.51194	1462	100	4.85653	4.68424	O		19	33	26	281	100	2.47342	315	100	2.6231	2.54826	O		32	26	29	575	100	3.35815	557	100	3.31457	3.33636	O		30	48	39	240	100	1.96829	258
chr6_28_tRNAIle_AAT+	TRI-AAT7-2	chr6:26780832-26780905	chr6	26780832	26780905	II	52	41	46.5	168	100	1.37197	162	100	1.32757	1.34977	NO		29	65	47	44	100	-0.0573332	63	100	0.272372	0.10752	NO		31	49	40	118	100	1.08017	96	100	0.847997	0.964084	NO		13	58	35.5	42	100	0.136502	41
chr6_159_tRNAAla_AGC-	TRA-AGC12-2	chr6:26796006-26796078	chr6	26796006	26796078	II	52	22	37	242	86.61	2.02137	322	87.01	2.39334	2.20736	O		68	10	39	76	89.09	0.619396	86	80.32	0.749457	0.684426	NO		50	48	49	133	85.46	1.04495	158	89.92	1.25081	1.14788	NO		20	48	34	66	89.54	0.584963	85
chr6_29_tRNAIle_TAT_I+	TRI-TAT2-2	chr6:26988125-26988218	chr6	26988125	26988218	II	62	80	71	6764	0	6.07183	8036	0	6.31943	6.19563	O		60	70	65	2075	0	4.46975	1704	0	4.19003	4.32989	O		42	85	63.5	4258	0	5.51919	4516	0	5.60349	5.56134	O		110	54	82	1065	0	3.28936	1208
chr6_30_tRNAPro_CGG+	TRP-CGG2-1	chr6:27059521-27059592	chr6	27059521	27059592	II	62	32	47	3190	0	5.38606	3684	0	5.59197	5.48901	O		28	41	34.5	1008	0	4.00836	912	0	3.86836	3.93836	O		19	13	16	2368	0	5.70405	2170	0	5.57973	5.64189	O		49	30	39.5	740	0	3.46977	788
chr6_31_tRNASer_GCT+	TRS-GCT1-1	chr6:27065085-27065166	chr6	27065085	27065166	II	58	35	46.5	4777	0	5.97353	5888	0	6.27351	6.12352	O		10	69	39.5	1021	0	3.91861	840	0	3.64593	3.78227	O		42	31	36.5	2540	0	5.27227	2428	0	5.20799	5.24013	O		51	60	55.5	547	0	2.75457	585
chr6_32_tRNAVal_CAC+	TRV-CAC9-1	chr6:27118022-27118094	chr6	27118022	27118094	II	46	57	51.5	69	0	0.280628	93	0	0.593786	0.437207	NO		55	32	43.5	43	0	-0.00984779	31	0	-0.268935	-0.139391	NO		29	27	28	43	0	0.331844	53	0	0.517058	0.424451	NO		15	31	23	27	0	0.10497	30
chr6_33_tRNAHis_GTG+	TRH-GTG1-5	chr6:27125906-27125977	chr6	27125906	27125977	II	22	43	32.5	6149	0	6.62737	7739	0	6.95773	6.79255	O		62	107	84.5	1333	0	3.57337	1183	0	3.40516	3.48926	O		37	28	32.5	3872	0	5.96421	3733	0	5.91188	5.93805	O		46	35	40.5	820	0	3.59177	843
chr6_34_tRNAThr_AGT+	TRT-AGT6-1	chr6:27130050-27130123	chr6	27130050	27130123	II	11	20	15.5	3700	0	6.35717	3912	0	6.43692	6.39704	O		35	38	36.5	947	0	3.87693	962	0	3.89891	3.88792	O		8	25	16.5	2406	0	5.71114	1958	0	5.41794	5.56454	O		9	20	14.5	664	0	3.96306	667
chr6_158_tRNAIle_AAT-	TRI-AAT5-2	chr6:27144994-27145067	chr6	27144994	27145067	II	10	7	8.5	3551	0	6.53936	3607	0	6.56175	6.55055	O		6	18	12	1907	0	5.52729	1620	0	5.29593	5.41161	O		1	16	8.5	3176	0	6.37977	2768	0	6.18339	6.28158	O		1	6	3.5	1483	0	5.49711	1420
chr6_157_tRNAVal_CAC-	TRV-CAC6-1	chr6:27173867-27173939	chr6	27173867	27173939	II	14	22	18	189	0	2.18982	176	0	2.10154	2.14568	O		2	13	7.5	42	0	0.941106	39	0	0.879706	0.910406	NO		18	39	28.5	115	0	1.30954	108	0	1.23816	1.27385	NO		6	24	15	35	0	0.530515	31
chr6_35_tRNASer_CGA+	TRS-CGA2-1	chr6:27177628-27177709	chr6	27177628	27177709	II	26	104	65	1951	0	4.38216	2185	0	4.54324	4.4627	O		39	89	64	373	0	2.10005	338	0	1.96897	2.03451	O		43	35	39	809	0	3.604	772	0	3.53893	3.57147	O		61	47	54	220	0	1.57347	225
chr6_156_tRNAArg_ACG-	TRR-ACG2-2	chr6:27181623-27181695	chr6	27181623	27181695	II	15	16	15.5	2444	0	5.76484	2682	0	5.89735	5.83109	O		20	13	16.5	447	0	3.35869	451	0	3.37073	3.36471	O		36	37	36.5	1252	0	4.2689	1197	0	4.20564	4.23727	O		37	24	30.5	284	0	2.37576	284
chr6_36_tRNAArg_ACG+	TRR-ACG2-3	chr6:27182952-27183024	chr6	27182952	27183024	II	20	38	29	5326	0	6.5043	6081	0	6.69455	6.59942	O		66	41	53.5	1572	0	4.26195	1501	0	4.19655	4.22925	O		38	37	37.5	3383	0	5.66001	3339	0	5.64129	5.65065	O		32	61	46.5	957	0	3.68952	963
chr6_155_tRNALeu_TAA-	TRL-TAA4-1	chr6:27198334-27198416	chr6	27198334	27198416	II	67	20	43.5	2746	0	5.23912	3598	0	5.62529	5.4322	O		26	37	31.5	524	0	3.17123	530	0	3.18677	3.179	O		40	10	25	1637	0	4.92168	1462	0	4.76167	4.84168	O		4	20	12	449	0	3.51156	487
chr6_37_tRNAVal_AAC+	TRV-AAC5-1	chr6:27203288-27203360	chr6	27203288	27203360	II	25	64	44.5	3210	0	5.44261	3049	0	5.36908	5.40584	O		31	21	26	834	0	3.94753	852	0	3.97728	3.96241	O		50	44	47	2322	0	4.93289	1824	0	4.58964	4.76126	O		24	49	36.5	681	0	3.41842	740
chr6_154_tRNAIle_AAT-	TRI-AAT5-3	chr6:27205350-27205423	chr6	27205350	27205423	II	21	45	33	5490	0	6.45317	6653	0	6.729	6.59109	O		33	12	22.5	1325	0	4.68983	1206	0	4.55722	4.62352	O		28	20	24	3662	0	6.0953	3644	0	6.08825	6.09177	O		42	15	28.5	748	0	3.73326	793
chr6_38_tRNAIle_AAT+	TRI-AAT9-1	chr6:27241739-27241812	chr6	27241739	27241812	II	26	19	22.5	40	0	0.415037	42	0	0.455679	0.435358	NO		3	44	23.5	18	0	-0.156504	28	0	0.116514	-0.0199952	NO		35	44	39.5	37	0	-0.0528519	38	0	-0.0314782	-0.0421651	NO		24	31	27.5	21	0	-0.173065	14
chr6_153_tRNAIle_AAT-	TRI-AAT3-1	chr6:27242990-27243063	chr6	27242990	27243063	II	32	14	23	857	0	4.06487	906	0	4.14244	4.10366	O		8	23	15.5	93	0	1.43472	86	0	1.35019	1.39245	NO		21	21	21	248	0	2.44652	258	0	2.4975	2.47201	O		30	30	30	59	0	0.568843	67
chr6_152_tRNAVal_CAC-	TRV-CAC2-1	chr6:27248049-27248121	chr6	27248049	27248121	II	34	60	47	5988	0	6.28828	6465	0	6.39833	6.3433	O		31	44	37.5	1929	0	4.85909	1960	0	4.88174	4.87041	O		16	28	22	4215	0	6.35111	3702	0	6.16529	6.2582	O		5	21	13	1594	0	5.23907	1662
chr6_39_Pseudo_AAT+	TRI-AAT10-1	chr6:27251864-27251937	chr6	27251864	27251937	II	25	44	34.5	30	0	-0.104337	33	0	-0.0339473	-0.069142	NO		39	20	29.5	32	0	0.0593785	26	0	-0.0874628	-0.0140421	NO		15	67	41	27	0	-0.316857	29	0	-0.267104	-0.291981	NO		25	92	58.5	44	0	-0.258152	29
chr6_40_tRNAVal_TAC+	TRV-TAC4-1	chr6:27258405-27258477	chr6	27258405	27258477	II	33	27	30	2605	0	5.4567	2916	0	5.61765	5.53717	O		40	18	29	679	0	3.587	558	0	3.31703	3.45201	O		40	32	36	1481	0	4.51689	1575	0	4.60396	4.56043	O		31	83	57	433	0	2.41192	435
chr6_41_Pseudo_ACT+	TRS-ACT1-1	chr6:27261671-27261744	chr6	27261671	27261744	II	30	28	29	4775	0	6.34768	5376	0	6.5177	6.43269	O		15	6	10.5	1365	0	5.1062	1285	0	5.021	5.0636	O		16	13	14.5	3133	0	6.15134	2812	0	5.99696	6.07415	O		1	19	10	920	0	4.56986	1025
chr6_42_tRNAGln_CTG+	TRQ-CTG5-1	chr6:27263212-27263283	chr6	27263212	27263283	II	50	41	45.5	4048	0	5.75524	4683	0	5.96403	5.85963	O		38	30	34	1001	0	4.00983	917	0	3.88722	3.94852	O		32	36	34	2471	0	5.28829	2272	0	5.16867	5.22848	O		38	38	38	785	0	3.58319	813
chr6_43_tRNASer_GCT+	TRS-GCT2-1	chr6:27265775-27265856	chr6	27265775	27265856	II	57	25	41	6792	0	6.58623	8365	0	6.88557	6.7359	O		28	32	30	1722	0	4.8679	1512	0	4.6837	4.7758	O		26	14	20	3388	0	6.09508	3536	0	6.15623	6.12566	O		35	53	44	1259	0	4.12258	1307
chr6_151_tRNAThr_CGT-	TRT-CGT6-1	chr6:27271568-27271639	chr6	27271568	27271639	II	39	17	28	2242	0	5.29177	2608	0	5.50725	5.39951	O		25	21	23	446	0	3.1669	443	0	3.15778	3.16234	O		4	17	10.5	1127	0	4.83632	1012	0	4.68529	4.76081	O		12	21	16.5	320	0	2.91205	363
chr6_150_tRNAMet_CAT-	TRX-CAT1-5	chr6:27300764-27300835	chr6	27300764	27300835	II	41	32	36.5	4546	0	6.10459	5318	0	6.3295	6.21705	O		37	118	77.5	1214	0	3.53258	1158	0	3.46613	3.49935	O		20	55	37.5	3149	0	5.55754	2861	0	5.42054	5.48904	O		23	36	29.5	1003	0	4.11781	1066
chr6_149_tRNALys_TTT-	TRK-TTT6-1	chr6:27302769-27302841	chr6	27302769	27302841	II	18	51	34.5	2679	0	5.39232	2915	0	5.51282	5.45257	O		65	43	54	512	0	2.68983	462	0	2.5502	2.62001	O		32	33	32.5	1185	0	4.28096	1160	0	4.25096	4.26596	O		6	53	29.5	365	0	2.73089	390
chr6_44_tRNASer_AGA+	TRS-AGA2-2	chr6:27446591-27446672	chr6	27446591	27446672	II	36	55	45.5	8078	0	6.74673	9203	0	6.93418	6.84045	O		23	94	58.5	2786	0	4.99183	2508	0	4.84187	4.91685	O		41	55	48	8180	0	6.71776	7147	0	6.52376	6.62076	O		39	32	35.5	2334	0	5.17359	2425
chr6_45_tRNAAsp_GTC+	TRD-GTC2-6	chr6:27447453-27447524	chr6	27447453	27447524	II	24	35	29.5	6995	0	6.88346	7531	0	6.98954	6.9365	O		27	13	20	2955	0	5.89966	2666	0	5.75275	5.8262	O		47	50	48.5	6264	0	6.32514	5662	0	6.1801	6.25262	O		27	58	42.5	2558	0	5.15771	2701
chr6_46_tRNASer_AGA+	TRS-AGA2-3	chr6:27463593-27463674	chr6	27463593	27463674	II	16	86	51	8576	0	6.73128	9760	0	6.91724	6.82426	O		72	37	54.5	2359	0	4.82131	2027	0	4.60545	4.71338	O		51	67	59	5624	0	5.98932	5903	0	6.05881	6.02407	O		79	42	60.5	1576	0	4.14941	1653
chr6_47_tRNASer_AGA+	TRS-AGA2-4	chr6:27470818-27470899	chr6	27470818	27470899	II	7	20	13.5	3753	0	6.44237	4413	0	6.67437	6.55837	O		25	70	47.5	945	0	3.65313	922	0	3.61869	3.63591	O		17	44	30.5	3113	0	5.69906	2951	0	5.62272	5.66089	O		13	39	26	723	0	3.74915	748
chr6_48_tRNAAsp_GTC+	TRD-GTC2-7	chr6:27471523-27471594	chr6	27471523	27471594	II	24	35	29.5	5955	0	6.65232	6322	0	6.73818	6.69525	O		20	18	19	2246	0	5.53757	2077	0	5.42626	5.48192	O		28	64	46	4979	0	6.04238	4527	0	5.90594	5.97416	O		41	68	54.5	1761	0	4.40567	1918
chr6_148_tRNASer_TGA-	TRS-TGA4-1	chr6:27473607-27473688	chr6	27473607	27473688	II	33	22	27.5	4838	0	6.40362	6569	0	6.84254	6.62308	O		51	58	54.5	1147	0	3.80002	1054	0	3.68127	3.74064	O		37	31	34	3226	0	5.66888	3480	0	5.77726	5.72307	O		37	42	39.5	810	0	3.5953	895
chr6_49_tRNAGln_CTG+	TRQ-CTG1-2	chr6:27487308-27487379	chr6	27487308	27487379	II	41	59	50	6709	0	6.39639	7814	0	6.61545	6.50592	O		32	55	43.5	2978	0	5.35492	2624	0	5.17428	5.2646	O		42	18	30	6067	0	6.66699	6029	0	6.65797	6.66248	O		26	32	29	2399	0	5.3635	2440
chr6_50_tRNASer_AGA+	TRS-AGA3-1	chr6:27499987-27500068	chr6	27499987	27500068	II	32	20	26	352	0	2.77007	446	0	3.08746	2.92877	O		64	7	35.5	119	0	1.18575	91	0	0.88544	1.03559	NO		67	40	53.5	235	0	1.66614	247	0	1.73004	1.69809	O		15	40	27.5	108	0	1.26303	117
chr6_147_tRNASer_AGA-	TRS-AGA1-1	chr6:27509554-27509635	chr6	27509554	27509635	II	47	27	37	1469	0	4.4837	1879	0	4.83251	4.6581	O		35	32	33.5	335	0	2.52307	274	0	2.25924	2.39116	O		43	47	45	879	0	3.59932	792	0	3.45418	3.52675	O		30	45	37.5	251	0	2.05761	267
chr6_51_tRNASer_TGA+	TRS-TGA2-1	chr6:27513468-27513549	chr6	27513468	27513549	II	66	44	55	3994	0	5.56502	4447	0	5.71893	5.64197	O		71	67	69	939	0	3.291	825	0	3.11042	3.20071	O		24	31	27.5	2614	0	5.52302	2539	0	5.4815	5.50226	O		52	50	51	649	0	3.06742	665
chr6_146_tRNAGln_CTG-	TRQ-CTG2-1	chr6:27515531-27515602	chr6	27515531	27515602	II	8	7	7.5	2368	0	5.9988	2783	0	6.22908	6.11394	O		30	27	28.5	729	0	3.69759	727	0	3.69378	3.69569	O		31	14	22.5	1792	0	5.11706	1566	0	4.926	5.02153	O		3	20	11.5	660	0	4.05541	734
chr6_145_tRNASer_AGA-	TRS-AGA4-1	chr6:27521192-27521273	chr6	27521192	27521273	II	35	66	50.5	4029	0	5.65599	4984	0	5.96083	5.80841	O		25	67	46	839	0	3.51528	855	0	3.54161	3.52845	O		61	74	67.5	2636	0	4.77313	2818	0	4.8684	4.82077	O		51	68	59.5	632	0	2.88687	650
chr6_52_tRNAArg_TCT_I+	TRR-TCT5-1	chr6:27529963-27530049	chr6	27529963	27530049	II	10	43	26.5	401	0	2.93137	481	0	3.177	3.05418	O		19	12	15.5	62	0	1.01577	35	0	0.514573	0.76517	NO		18	16	17	125	0	1.72154	133	0	1.79414	1.75784	O		5	15	10	42	0	0.847997	47
chr6_53_tRNALys_TTT+	TRK-TTT9-1	chr6:27543846-27543918	chr6	27543846	27543918	II	38	45	41.5	1053	0	3.92095	1114	0	4	3.96047	O		7	15	11	191	0	2.43035	189	0	2.41724	2.42379	O		35	16	25.5	590	0	3.48171	535	0	3.34769	3.4147	O		20	16	18	168	0	2.04439	173
chr6_144_tRNAAsp_GTC-	TRD-GTC3-1	chr6:27551236-27551307	chr6	27551236	27551307	II	6	20	13	3279	0	6.26591	3602	0	6.40028	6.3331	O		9	23	16	1014	0	4.50434	1009	0	4.49742	4.50088	O		2	12	7	2535	0	6.11529	2148	0	5.87933	5.99731	O		8	13	10.5	971	0	4.62738	947
chr6_143_tRNALys_TTT-	TRK-TTT4-1	chr6:27559593-27559665	chr6	27559593	27559665	II	18	11	14.5	3102	0	6.13714	3409	0	6.27204	6.20459	O		15	38	26.5	605	0	3.49043	636	0	3.5592	3.52482	O		13	44	28.5	1393	0	4.60436	1160	0	4.34638	4.47537	O		12	31	21.5	490	0	3.33587	489
chr6_142_tRNAMet_CAT-	TRX-CAT1-6	chr6:27560600-27560671	chr6	27560600	27560671	II	51	18	34.5	8111	0	6.97976	9024	0	7.13311	7.05644	O		13	33	23	2375	0	5.5039	2282	0	5.44701	5.47545	O		54	36	45	5023	0	6.07411	5672	0	6.24843	6.16127	O		32	47	39.5	1795	0	4.71474	1975
chr6_141_tRNALeu_CAA_I-	TRL-CAA3-1	chr6:27570348-27570454	chr6	27570348	27570454	II	55	54	54.5	838	0	3.36067	1016	0	3.62979	3.49523	O		38	58	48	163	0	1.30705	129	0	1.02748	1.16727	NO		85	41	63	397	0	2.19893	387	0	2.16474	2.18184	O		30	61	45.5	105	0	0.838411	144
chr6_140_tRNALeu_CAA_I-	TRL-CAA2-1	chr6:27573417-27573524	chr6	27573417	27573524	II	36	39	37.5	4312	0	6.00733	4553	0	6.08526	6.04629	O		3	30	16.5	967	0	4.42229	895	0	4.31415	4.36822	O		54	13	33.5	2646	0	5.39718	2442	0	5.28278	5.33998	O		13	17	15	705	0	4.02975	765
chr6_54_tRNAThr_CGT+	TRT-CGT5-1	chr6:27586135-27586208	chr6	27586135	27586208	II	52	90	71	1620	0	4.03004	1627	0	4.03615	4.03309	O		31	95	63	271	0	1.69446	253	0	1.6055	1.64998	NO		84	102	93	514	0	2.14495	453	0	1.97336	2.05916	O		52	54	53	155	0	1.15634	158
chr6_55_tRNAIle_TAT_I+	TRI-TAT2-3	chr6:27599200-27599293	chr6	27599200	27599293	II	31	48	39.5	905	0	3.74988	1022	0	3.91998	3.83493	O		82	64	73	140	0	0.72289	99	0	0.324727	0.523809	NO		72	104	88	363	0	1.73574	345	0	1.6681	1.70192	O		42	45	43.5	121	0	1.03873	116
chr6_139_tRNAVal_AAC-	TRV-AAC3-1	chr6:27618707-27618779	chr6	27618707	27618779	II	11	9	10	2428	0	5.94134	2773	0	6.13083	6.03608	O		26	61	43.5	756	0	3.41871	732	0	3.37397	3.39634	O		30	13	21.5	1747	0	5.10873	1597	0	4.9815	5.04511	O		8	50	29	726	0	3.6796	707
chr6_56_tRNAPhe_GAA+	TRF-GAA7-1	chr6:27632545-27632620	chr6	27632545	27632620	II	10	49	29.5	24	0	-0.13993	14	0	-0.435386	-0.287658	NO		14	9	11.5	26	0	0.432315	30	0	0.531851	0.482083	NO		13	10	11.5	28	0	0.482942	29	0	0.507604	0.495273	NO		25	24	24.5	17	0	-0.213595	25
chr6_57_tRNAIle_AAT+	TRI-AAT8-1	chr6:27636362-27636435	chr6	27636362	27636435	II	35	34	34.5	5729	0	6.48038	6588	0	6.68095	6.58066	O		21	33	27	1400	0	4.64891	1264	0	4.50473	4.57682	O		9	13	11	3559	0	6.45181	3193	0	6.29664	6.37423	O		22	46	34	993	0	3.99859	933
chr6_138_tRNAArg_ACG-	TRR-ACG2-4	chr6:27638344-27638416	chr6	27638344	27638416	II	5	35	20	3131	0	5.98231	3380	0	6.0917	6.037	O		15	0	7.5	859	0	4.56722	772	0	4.41864	4.49293	O		39	24	31.5	1895	0	4.96813	1690	0	4.80568	4.8869	O		4	28	16	568	0	3.70044	572
chr6_137_tRNASer_CGA-	TRS-CGA3-1	chr6:27640229-27640310	chr6	27640229	27640310	II	62	51	56.5	671	0	3.01864	821	0	3.29839	3.15851	O		21	41	31	267	0	2.28358	269	0	2.29326	2.28842	O		76	37	56.5	634	0	2.94041	565	0	2.78212	2.86126	O		59	43	51	245	0	1.76344	287
chr6_136_tRNAVal_AAC-	TRV-AAC4-1	chr6:27648885-27648957	chr6	27648885	27648957	II	22	60	41	138	0	1.24257	214	0	1.78099	1.51178	NO		29	23	26	46	0	0.440573	44	0	0.402098	0.421336	NO		66	64	65	125	0	0.706269	96	0	0.407424	0.556847	NO		28	68	48	37	0	-0.219313	35
chr6_58_tRNAVal_CAC+	TRV-CAC12-1	chr6:27650488-27650561	chr6	27650488	27650561	II	59	40	49.5	36	0	-0.268489	42	0	-0.142958	-0.205723	NO		18	37	27.5	44	0	0.363963	30	0	0.0614005	0.212682	NO		38	40	39	31	0	-0.177787	39	0	0	-0.0888936	NO		15	42	28.5	30	0	0.0365259	45
chr6_135_tRNAThr_AGT-	TRT-AGT2-2	chr6:27652474-27652547	chr6	27652474	27652547	II	25	35	30	2204	0	5.21852	2341	0	5.30439	5.26146	O		33	74	53.5	460	0	2.55293	456	0	2.54111	2.54702	O		39	24	31.5	1270	0	4.40178	1093	0	4.19063	4.2962	O		46	51	48.5	398	0	2.44685	474
chr6_59_tRNAIle_AAT+	TRI-AAT2-1	chr6:27655967-27656040	chr6	27655967	27656040	II	46	32	39	11896	0	7.4333	15658	0	7.82885	7.63107	O		64	27	45.5	4521	0	5.91356	3942	0	5.71725	5.8154	O		108	50	79	10808	0	6.63563	11357	0	6.70692	6.67127	O		44	58	51	2979	0	5.21522	3412
chr6_134_tRNALeu_TAA-	TRL-TAA2-1	chr6:27688898-27688980	chr6	27688898	27688980	II	14	22	18	3198	0	6.07146	3566	0	6.22721	6.14934	O		21	15	18	652	0	3.82867	561	0	3.62205	3.72536	O		29	10	19.5	1335	0	4.78533	1418	0	4.87049	4.82791	O		22	15	18.5	418	0	3.20744	420
chr6_60_tRNAThr_AGT+	TRT-AGT4-1	chr6:27694473-27694546	chr6	27694473	27694546	II	5	12	8.5	1223	0	5.02438	1307	0	5.118	5.07119	O		2	24	13	159	0	2.13598	157	0	2.12063	2.1283	O		5	14	9.5	483	0	3.69903	422	0	3.5164	3.60772	O		12	49	30.5	131	0	1.41205	116
chr6_133_tRNAVal_CAC-	TRV-CAC7-1	chr6:27696327-27696399	chr6	27696327	27696399	II	30	30	30	19	0	-0.292181	21	0	-0.234465	-0.263323	NO		17	37	27	20	0	-0.189034	38	0	0.254573	0.0327695	NO		33	16	24.5	33	0	0.209096	21	0	-0.095759	0.0566683	NO		47	6	26.5	27	0	0.0127111	19
chr6_132_tRNAVal_AAC-	TRV-AAC1-5	chr6:27721179-27721251	chr6	27721179	27721251	II	18	8	13	5785	0	7.0793	6464	0	7.23863	7.15896	O		41	32	36.5	3690	0	5.8058	3369	0	5.67561	5.74071	O		8	44	26	5564	0	6.64231	4777	0	6.42357	6.53294	O		26	21	23.5	3818	0	6.16843	3686
chr6_61_tRNAMet_CAT+	TRX-CAT2-1	chr6:27745664-27745735	chr6	27745664	27745735	II	3	20	11.5	1919	0	5.55348	2158	0	5.72036	5.63692	O		17	10	13.5	519	0	3.65772	468	0	3.51706	3.58739	O		10	29	19.5	954	0	4.31316	854	0	4.15855	4.23585	O		47	60	53.5	355	0	2.20501	318
chr6_131_tRNAGln_CTG-	TRQ-CTG6-1	chr6:27759135-27759206	chr6	27759135	27759206	II	21	33	27	5309	0	6.54946	6461	0	6.83134	6.6904	O		28	33	30.5	1730	0	4.8625	1539	0	4.69677	4.77963	O		4	48	26	4925	0	6.46731	4211	0	6.24283	6.35507	O		30	21	25.5	1148	0	4.40771	1191
chr6_130_tRNAGln_TTG-	TRQ-TTG3-3	chr6:27763640-27763711	chr6	27763640	27763711	II	7	48	27.5	4535	0	6.31091	4191	0	6.19788	6.25439	O		26	4	15	2341	0	5.71943	2233	0	5.65217	5.6858	O		9	43	26	4402	0	6.30639	3384	0	5.92989	6.11814	O		12	46	29	2493	0	5.41828	2317
chr6_129_tRNAMet_CAT-	TRX-CAT1-7	chr6:27870271-27870342	chr6	27870271	27870342	II	27	80	53.5	9415	0	6.82163	11073	0	7.05496	6.93829	O		21	26	23.5	5538	0	6.70148	5251	0	6.62513	6.6633	O		27	37	32	9196	0	7.21729	9272	0	7.22913	7.22321	O		18	17	17.5	4796	0	6.66676	5444
chr6_128_tRNAGly_GCC-	TRG-GCC2-3	chr6:27870686-27870756	chr6	27870686	27870756	II	32	93	62.5	11049	0	6.90416	13302	0	7.17122	7.03769	O		26	15	20.5	7119	0	7.14531	6448	0	7.00312	7.07422	O		21	59	40	10715	0	7.26209	11179	0	7.32309	7.29259	O		26	24	25	6372	0	6.86295	6869
chr6_62_tRNASer_GCT+	TRS-GCT5-1	chr6:28180815-28180896	chr6	28180815	28180896	II	15	44	29.5	9575	0	7.33475	12135	0	7.67563	7.50519	O		29	43	36	4057	0	5.95243	3733	0	5.83327	5.89285	O		19	12	15.5	6418	0	7.14684	7602	0	7.39005	7.26845	O		19	64	41.5	2507	0	5.14904	2857
chr6_127_tRNAThr_TGT-	TRT-TGT1-1	chr6:28442329-28442402	chr6	28442329	28442402	II	21	9	15	4778	0	6.73937	4862	0	6.76436	6.75186	O		38	50	44	1370	0	4.24176	1358	0	4.22934	4.23555	O		29	14	21.5	2831	0	5.7958	2536	0	5.6388	5.7173	O		2	17	9.5	1080	0	4.81256	1096
chr6_126_tRNALeu_AAG-	TRL-AAG4-1	chr6:28446400-28446481	chr6	28446400	28446481	II	15	38	26.5	150	0	1.67167	204	0	2.05019	1.86093	O		23	61	42	34	0	-0.169925	45	0	0.0588937	-0.0555157	NO		19	17	18	92	0	1.34577	90	0	1.32193	1.33385	NO		42	42	42	45	0	0.0588937	42
chr6_125_tRNAThr_CGT-	TRT-CGT1-1	chr6:28456770-28456843	chr6	28456770	28456843	II	16	29	22.5	3842	0	6.20462	4241	0	6.34611	6.27537	O		1	4	2.5	1157	0	5.19074	1095	0	5.11334	5.15204	O		14	8	11	2539	0	5.96944	2208	0	5.77044	5.86994	O		8	8	8	799	0	4.4473	792
chr6_63_tRNAIle_TAT_I+	TRI-TAT3-1	chr6:28505367-28505460	chr6	28505367	28505460	II	25	34	29.5	416	0	2.90608	444	0	2.99393	2.95	O		65	27	46	121	0	0.990477	94	0	0.706269	0.848373	NO		19	90	54.5	290	0	1.92105	317	0	2.03791	1.97948	O		37	61	49	79	0	0.464404	98
chr6_124_tRNAArg_TCG-	TRR-TCG5-1	chr6:28510891-28510963	chr6	28510891	28510963	II	45	41	43	4765	0	6.03749	5940	0	6.35369	6.19559	O		12	63	37.5	1707	0	4.68557	1588	0	4.58318	4.63437	O		48	33	40.5	2883	0	5.36874	3231	0	5.53155	5.45014	O		18	51	34.5	1420	0	4.49061	1527
chr6_64_tRNAGln_TTG+	TRQ-TTG2-1	chr6:28557156-28557227	chr6	28557156	28557227	II	34	83	58.5	6312	0	6.16312	7374	0	6.38648	6.2748	O		28	44	36	1521	0	4.55459	1439	0	4.47622	4.51541	O		28	35	31.5	4196	0	6.10256	4222	0	6.11141	6.10699	O		51	39	45	1175	0	4.006	1261
chr6_123_tRNASer_GCT-	TRS-GCT4-1	chr6:28565117-28565198	chr6	28565117	28565198	II	19	22	20.5	3577	0	6.15837	4385	0	6.44999	6.30418	O		7	0	3.5	542	0	4.09378	532	0	4.06834	4.08106	O		26	12	19	1185	0	4.63203	1139	0	4.57635	4.60419	O		64	36	50	353	0	2.25927	334
chr6_65_tRNAAla_AGC+	TRA-AGC3-1	chr6:28574933-28575004	chr6	28574933	28575004	II	20	16	18	6708	0	7.13314	7714	0	7.3339	7.23352	O		20	75	47.5	1717	0	4.49454	1535	0	4.33582	4.41518	O		27	9	18	4506	0	6.56224	4389	0	6.52454	6.54339	O		5	12	8.5	1222	0	5.02323	1441
chr6_122_Pseudo_TGC-	TRA-TGC9-1	chr6:28601859-28601930	chr6	28601859	28601930	II	4	64	34	133	0	1.34873	154	0	1.52356	1.43615	NO		18	6	12	41	0	0.75743	45	0	0.836501	0.796965	NO		21	35	28	111	0	1.28157	117	0	1.34169	1.31163	NO		5	12	8.5	44	0	0.942667	34
chr6_66_tRNAAla_TGC+	TRA-TGC2-1	chr6:28611222-28611293	chr6	28611222	28611293	II	16	18	17	2250	0	5.60023	2489	0	5.74405	5.67214	O		17	4	10.5	508	0	3.73161	470	0	3.62593	3.67877	O		4	8	6	1165	0	5.05287	1132	0	5.01247	5.03267	O		19	17	18	296	0	2.76377	300
chr6_121_tRNAThr_CGT-	TRT-CGT3-1	chr6:28615984-28616057	chr6	28615984	28616057	II	2	22	12	4590	0	6.78136	4583	0	6.77917	6.78027	O		39	16	27.5	1549	0	4.77931	1545	0	4.77565	4.77748	O		21	20	20.5	3426	0	6.09668	3076	0	5.94263	6.01965	O		2	28	15	1342	0	4.93021	1236
chr6_120_tRNAAla_AGC-	TRA-AGC4-1	chr6:28626014-28626085	chr6	28626014	28626085	II	15	16	15.5	3998	0	6.46805	4752	0	6.7156	6.59183	O		15	15	15	2361	0	5.73155	2426	0	5.77024	5.75089	O		16	12	14	3843	0	6.4598	3367	0	6.27061	6.36521	O		4	27	15.5	2221	0	5.62856	2253
chr6_119_tRNAAla_CGC-	TRA-CGC2-1	chr6:28641613-28641684	chr6	28641613	28641684	II	40	25	32.5	7377	0	6.88889	7957	0	6.99765	6.94327	O		17	21	19	2308	0	5.57635	2148	0	5.47408	5.52521	O		7	20	13.5	4544	0	6.7163	4585	0	6.72917	6.72273	O		32	39	35.5	1627	0	4.66093	1604
chr6_118_Pseudo_TTT-	TRK-TTT13-1	chr6:28660987-28661060	chr6	28660987	28661060	II	64	33	48.5	1228	0	4.0023	1399	0	4.18617	4.09423	O		49	24	36.5	304	0	2.32842	332	0	2.44456	2.38649	O		19	60	39.5	730	0	3.45091	736	0	3.46226	3.45659	O		19	23	21	170	0	1.97143	181
chr6_117_tRNAAla_CGC-	TRA-CGC5-1	chr6:28663709-28663780	chr6	28663709	28663780	II	11	38	24.5	845	0	4.00495	949	0	4.16698	4.08597	O		26	41	33.5	150	0	1.50317	160	0	1.58117	1.54217	NO		26	47	36.5	378	0	2.61714	335	0	2.45647	2.53681	O		9	15	12	151	0	2.10753	130
chr6_67_tRNAAla_AGC+	TRA-AGC5-1	chr6:28678366-28678437	chr6	28678366	28678437	II	38	65	51.5	2895	0	5.16549	3390	0	5.39105	5.27827	O		25	29	27	629	0	3.53124	561	0	3.37412	3.45268	O		27	20	23.5	1353	0	4.69212	1261	0	4.59281	4.64246	O		40	17	28.5	477	0	3.11548	466
chr6_68_tRNAAla_AGC+	TRA-AGC7-1	chr6:28687481-28687552	chr6	28687481	28687552	II	13	4	8.5	1429	0	5.24398	1482	0	5.29546	5.26972	O		5	13	9	180	0	2.42884	160	0	2.28445	2.35665	O		2	18	10	532	0	3.8125	471	0	3.64674	3.72962	O		3	17	10	131	0	2.00899	107
chr6_69_tRNAThr_AGT+	TRT-AGT3-1	chr6:28693795-28693868	chr6	28693795	28693868	II	11	44	27.5	1645	0	4.86446	1847	0	5.02872	4.94659	O		14	26	20	284	0	2.65076	324	0	2.82375	2.73726	O		35	16	25.5	843	0	3.97542	766	0	3.84221	3.90882	O		5	2	3.5	204	0	2.80428	200
chr6_116_Pseudo_GAA-	TRF-GAA11-1	chr6:28694855-28694927	chr6	28694855	28694927	II	10	43	26.5	131	0	1.51074	109	0	1.29876	1.40475	NO		2	10	6	34	0	0.830075	21	0	0.5025	0.666288	NO		2	10	6	50	0	1.152	30	0	0.736966	0.944484	NO		8	51	29.5	22	0	-0.194378	24
chr6_70_tRNAAla_CGC+	TRA-CGC4-1	chr6:28697092-28697163	chr6	28697092	28697163	II	39	8	23.5	5504	0	6.69264	5437	0	6.67507	6.68385	O		3	10	6.5	1747	0	5.6054	1756	0	5.61269	5.60905	O		9	16	12.5	4342	0	6.68469	3579	0	6.40799	6.54634	O		27	15	21	1506	0	4.91254	1416
chr6_115_tRNAVal_AAC-	TRV-AAC6-1	chr6:28703206-28703277	chr6	28703206	28703277	II	27	25	26	2497	0	5.49586	2982	0	5.74915	5.6225	O		60	43	51.5	410	0	2.43263	373	0	2.30591	2.36927	O		72	31	51.5	886	0	3.49048	899	0	3.51081	3.50064	O		20	28	24	283	0	2.53513	281
chr6_114_tRNAArg_CCG-	TRR-CCG1-1	chr6:28710729-28710801	chr6	28710729	28710801	II	2	30	16	1147	0	4.67734	1508	0	5.06328	4.87031	O		39	21	30	309	0	2.49825	288	0	2.40599	2.45212	O		89	27	58	776	0	3.1952	618	0	2.88042	3.03781	O		15	20	17.5	188	0	2.19833	183
chr6_71_tRNALys_TTT+	TRK-TTT7-1	chr6:28715521-28715593	chr6	28715521	28715593	II	10	35	22.5	3943	0	6.24177	4490	0	6.42786	6.33481	O		41	18	29.5	971	0	4.07241	847	0	3.88162	3.97701	O		27	32	29.5	2105	0	5.1652	2046	0	5.12477	5.14499	O		22	25	23.5	607	0	3.57368	677
chr6_113_tRNAAla_TGC-	TRA-TGC6-1	chr6:28726141-28726212	chr6	28726141	28726212	II	37	61	49	3342	0	5.41561	3969	0	5.66164	5.53863	O		31	30	30.5	540	0	3.23595	507	0	3.14992	3.19293	O		12	16	14	1272	0	4.88708	1278	0	4.89372	4.8904	O		6	43	24.5	275	0	2.48448	302
chr6_112_tRNAPhe_GAA-	TRF-GAA6-1	chr6:28731374-28731447	chr6	28731374	28731447	II	23	25	24	37	0	0.311202	31	0	0.17585	0.243526	NO		17	4	10.5	27	0	0.49304	28	0	0.518131	0.505586	NO		33	29	31	30	0	-0.0238467	24	0	-0.17585	-0.0998483	NO		8	28	18	27	0	0.247928	31
chr6_72_tRNAPhe_GAA+	TRF-GAA5-1	chr6:28732164-28732236	chr6	28732164	28732236	II	13	37	25	218	0	2.17284	179	0	1.926	2.04942	O		23	29	26	42	0	0.36257	38	0	0.280108	0.321339	NO		28	32	30	70	0	0.736966	46	0	0.341037	0.539001	NO		19	27	23	33	0	0.249359	33
chr6_111_Pseudo_AGC-	TRA-AGC23-1	chr6:28746544-28746615	chr6	28746544	28746615	II	90	39	64.5	77	0	0.179225	100	0	0.460125	0.319675	NO		23	43	33	49	0	0.326501	27	0	-0.14439	0.0910555	NO		7	40	23.5	61	0	0.766328	47	0	0.52532	0.645824	NO		33	84	58.5	40	0	-0.338323	40
chr6_110_tRNAAla_TGC-	TRA-TGC1-1	chr6:28757547-28757618	chr6	28757547	28757618	II	18	29	23.5	4241	0	6.31889	5117	0	6.58805	6.45347	O		21	40	30.5	862	0	3.88204	872	0	3.89812	3.89008	O		62	20	41	1918	0	4.77803	1629	0	4.54635	4.66219	O		13	40	26.5	550	0	3.35973	625
chr6_109_tRNAPhe_GAA-	TRF-GAA1-1	chr6:28758499-28758571	chr6	28758499	28758571	II	32	22	27	1511	0	4.75676	1607	0	4.84395	4.80035	O		18	29	23.5	256	0	2.4184	253	0	2.40319	2.4108	O		17	25	21	655	0	3.74753	541	0	3.48492	3.61623	O		9	36	22.5	184	0	2.02722	168
chr6_108_tRNAAla_AGC-	TRA-AGC1-1	chr6:28763741-28763812	chr6	28763741	28763812	II	61	56	58.5	10663	0	6.91677	12190	0	7.10935	7.01306	O		83	60	71.5	3257	0	5.01722	2839	0	4.821	4.91911	O		32	21	26.5	6071	0	6.75465	6266	0	6.80004	6.77735	O		73	53	63	2377	0	4.69386	2487
chr6_107_tRNAAla_TGC-	TRA-TGC7-1	chr6:28770577-28770647	chr6	28770577	28770647	II	15	46	30.5	3289	1.77	5.77767	4084	0.79	6.08746	5.93257	O		13	32	22.5	576	0.36	3.52893	540	1.13	3.44057	3.48475	O		17	17	17	1412	0.65	4.93927	1526	0.68	5.04904	4.99415	O		35	58	46.5	416	0.72	2.54351	395
chr6_106_tRNAPhe_GAA-	TRF-GAA3-1	chr6:28775610-28775682	chr6	28775610	28775682	II	34	45	39.5	5115	0	6.21001	6545	0	6.56383	6.38692	O		20	46	33	1609	0	4.70132	1466	0	4.56961	4.63547	O		16	32	24	3014	0	5.81687	2863	0	5.74346	5.78016	O		10	25	17.5	977	0	4.40599	988
chr6_105_tRNAAla_AGC-	TRA-AGC6-1	chr6:28779849-28779920	chr6	28779849	28779920	II	32	14	23	3636	0	6.11207	3939	0	6.22664	6.16936	O		21	37	29	668	0	3.56444	690	0	3.60921	3.58683	O		48	21	34.5	1388	0	4.45841	1332	0	4.40028	4.42935	O		53	34	43.5	459	0	2.73402	469
chr6_104_tRNAAla_TGC-	TRA-TGC5-1	chr6:28785012-28785083	chr6	28785012	28785083	II	39	14	26.5	4743	1.23	6.4005	5492	0.59	6.6108	6.50565	O		64	16	40	972	0.21	3.83938	876	0.7	3.69408	3.76673	O		16	40	28	2044	0.45	5.16022	2178	0.47	5.25054	5.20538	O		17	42	29.5	642	0.47	3.4975	672
chr6_103_tRNAPhe_GAA-	TRF-GAA4-1	chr6:28791093-28791166	chr6	28791093	28791166	II	3	32	17.5	268	0	2.64931	320	0	2.88136	2.76533	O		3	53	28	28	0	0	26	0	-0.0506261	-0.025313	NO		6	21	13.5	82	0	1.36441	47	0	0.823843	1.09413	NO		6	10	8	29	0	0.634716	26
chr6_102_tRNAAla_AGC-	TRA-AGC2-1	chr6:28806221-28806292	chr6	28806221	28806292	II	16	48	32	5644	0	6.51595	6094	0	6.62606	6.57101	O		42	57	49.5	2638	0	5.06866	2475	0	4.97771	5.02319	O		24	13	18.5	4674	0	6.59976	4183	0	6.44072	6.52024	O		16	58	37	2225	0	5.07282	2092
chr6_101_tRNAAla_AGC-	TRA-AGC2-2	chr6:28831462-28831533	chr6	28831462	28831533	II	23	59	41	8621	0	6.9289	10064	0	7.15146	7.04018	O		64	66	65	5114	0	5.75882	4636	0	5.61811	5.68847	O		55	28	41.5	7662	0	6.74927	7661	0	6.74908	6.74918	O		19	73	46	4340	0	5.84549	4519
chr6_73_tRNAArg_CCG+	TRR-CCG1-2	chr6:28849165-28849237	chr6	28849165	28849237	II	20	46	33	7706	0	6.94009	8390	0	7.06232	7.00121	O		26	13	19.5	4003	0	6.34828	3693	0	6.23289	6.29059	O		10	29	19.5	6298	0	6.99818	6091	0	6.9502	6.97419	O		12	30	21	3202	0	5.98579	3482
chr6_100_tRNALeu_CAA_I-	TRL-CAA1-1	chr6:28864000-28864105	chr6	28864000	28864105	II	57	31	44	13765	0.65	7.5424	15866	0.14	7.74692	7.64466	O		38	43	40.5	8001	0.33	6.83181	7134	0.21	6.667	6.74941	O		73	73	73	10859	0.44	6.72408	12179	0.39	6.88916	6.80662	O		68	56	62	6097	0.43	6.0574	7452
chr6_74_tRNALeu_CAA_I+	TRL-CAA1-2	chr6:28908830-28908934	chr6	28908830	28908934	II	40	107	73.5	11324	0	6.77743	13950	0	7.07759	6.92751	O		53	23	38	5151	0	6.25155	4442	0	6.03924	6.1454	O		37	54	45.5	9707	0	7.01086	11155	0	7.21087	7.11086	O		25	35	30	3810	0	6	4178
chr6_99_tRNAGln_CTG-	TRQ-CTG1-3	chr6:28909378-28909449	chr6	28909378	28909449	II	54	44	49	5351	0	6.08988	5768	0	6.19756	6.14372	O		27	9	18	2187	0	5.52943	2098	0	5.47032	5.49988	O		24	25	24.5	4895	0	6.49772	4343	0	6.32622	6.41197	O		35	30	32.5	1872	0	4.92752	2075
chr6_98_tRNALeu_AAG-	TRL-AAG2-2	chr6:28911399-28911480	chr6	28911399	28911480	II	81	25	53	9063	0	6.7755	9796	0	6.88735	6.83143	O		71	111	91	2157	0	4.17587	1831	0	3.943	4.05944	O		38	86	62	5227	0	5.83646	4996	0	5.77163	5.80405	O		130	42	86	1189	0	3.3935	1164
chr6_75_tRNAMet_CAT+	TRM-CAT3-1	chr6:28912352-28912424	chr6	28912352	28912424	II	9	0	4.5	9879	0	8.166	10986	0	8.31879	8.24239	O		52	0	26	4511	0	6.34144	4362	0	6.29331	6.31737	O		26	24	25	7690	0	7.13303	8797	0	7.32635	7.22969	O		6	32	19	3756	0	6.27175	4257
chr6_76_tRNALys_TTT+	TRK-TTT3-3	chr6:28918806-28918878	chr6	28918806	28918878	II	25	43	34	5087	0	6.32108	5736	0	6.49336	6.40722	O		8	20	14	1672	0	5.27358	1496	0	5.11611	5.19485	O		25	5	15	3482	0	6.28622	3014	0	6.0799	6.18306	O		27	16	21.5	1266	0	4.65335	1223
chr6_97_tRNAMet_CAT-	TRM-CAT3-2	chr6:28921042-28921114	chr6	28921042	28921114	II	35	35	35	6853	0	6.72645	8360	0	7.01209	6.86927	O		17	4	10.5	2972	0	6.21186	2792	0	6.12265	6.16726	O		3	20	11.5	6357	0	7.26588	6242	0	7.23967	7.25278	O		12	36	24	2294	0	5.42751	2542
chr6_96_tRNAPhe_GAA-	TRF-GAA1-2	chr6:28949449-28949521	chr6	28949449	28949521	II	29	27	28	4448	0	6.27066	4656	0	6.33616	6.30341	O		25	18	21.5	1677	0	5.05075	1597	0	4.9815	5.01612	O		6	23	14.5	3421	0	6.27707	2812	0	5.99696	6.13701	O		35	10	22.5	1307	0	4.67054	1322
chr6_77_tRNAGlu_CTC+	TRE-CTC1-6	chr6:28949976-28950047	chr6	28949976	28950047	II	37	22	29.5	9831	0	7.3727	11537	0	7.60291	7.4878	O		74	27	50.5	6151	0	6.26271	5676	0	6.14735	6.20503	O		48	24	36	8327	0	6.98438	9373	0	7.15451	7.06944	O		47	25	36	5396	0	6.36128	6232
chr6_78_tRNALeu_AAG+	TRL-AAG3-1	chr6:28956779-28956860	chr6	28956779	28956860	II	66	57	61.5	265	0	1.68887	336	0	2	1.84444	O		27	15	21	64	0	0.882164	56	0	0.753839	0.818001	NO		53	29	41	106	0	0.937716	103	0	0.905535	0.921626	NO		41	50	45.5	38	0	-0.150942	57
chr6_79_tRNAGln_TTG+	TRQ-TTG10-1	chr6:37287995-37288067	chr6	37287995	37288067	II	29	14	21.5	43	0	0.503324	35	0	0.335867	0.419596	NO		13	32	22.5	38	0	0.373217	39	0	0.394279	0.383748	NO		35	20	27.5	26	0	-0.0381351	22	0	-0.14505	-0.0915927	NO		28	16	22	35	0	0.321928	25
7SK_RNA	RN7SK	chr6:52860417-52860749	chr6	52860417	52860749	III	101	89	95	15501	29.44	6.95708	18968	31.18	7.24778	7.10243	O		129	44	86.5	12095	31.8	6.70151	9657	27.67	6.37765	6.53958	O		119	89	104	15470	31.85	6.85389	15727	30.48	6.87762	6.86575	O		57	111	84	8550	29.92	6.23387	9546
chr6_95_tRNAAla_AGC-	TRA-AGC22-1	chr6:58141877-58141949	chr6	58141877	58141949	II	97	24	60.5	286	3.54	1.80393	304	4.81	1.88386	1.8439	O		48	28	38	94	0.55	0.866733	76	2.46	0.640458	0.753596	NO		29	39	34	148	5.29	1.47573	160	5.26	1.56986	1.52279	NO		70	61	65.5	68	5.06	0.037281	74
chr6_94_tRNAAla_AGC-	TRA-AGC19-1	chr6:58142589-58142661	chr6	58142589	58142661	II	44	26	35	2384	3.33	5.21484	3202	1.89	5.63584	5.42534	O		28	62	45	610	1.75	3.09311	470	2.39	2.73697	2.91504	O		67	22	44.5	1098	2.74	3.92038	1342	1.82	4.2029	4.06164	O		18	19	18.5	385	2.77	3.09705	475
chr6_80_tRNAIle_AAT+	TRI-AAT1-1	chr6:58149254-58149327	chr6	58149254	58149327	II	62	66	64	353	0	2.02661	353	0	2.02661	2.02661	O		52	43	47.5	81	0	0.518291	110	0	0.853159	0.685725	NO		5	37	21	166	0	1.94228	181	0	2.04867	1.99548	O		40	50	45	78	0	0.526069	88
chr6_93_tRNAAla_AGC-	TRA-AGC13-2	chr6:58164628-58164700	chr6	58164628	58164700	II	76	43	59.5	510	49.59	2.593	493	49.25	2.54685	2.56993	O		74	65	69.5	155	43.14	0.894757	115	50.81	0.543284	0.719021	NO		39	56	47.5	265	51.13	1.92845	241	51.75	1.80602	1.86724	O		83	70	76.5	125	52.77	0.541415	137
chr6_92_tRNAMet_CAT-	TRM-CAT7-1	chr6:58168492-58168564	chr6	58168492	58168564	II	24	16	20	50	38.18	0.678072	59	26.31	0.831877	0.754975	NO		40	33	36.5	40	19.48	0.0740006	54	7.82	0.337035	0.205518	NO		17	56	36.5	47	20.38	0.211504	49	27.27	0.248498	0.230001	NO		37	36	36.5	35	2.43	-0.0329146	30
chr6_91_tRNAAla_AGC-	TRA-AGC12-3	chr6:58182679-58182751	chr6	58182679	58182751	II	35	46	40.5	328	38.3	2.34426	389	39.51	2.57126	2.45776	O		60	53	56.5	95	37.7	0.531156	103	41.55	0.620654	0.575905	NO		51	73	62	221	45.6	1.44798	242	47.02	1.5639	1.50594	NO		88	53	70.5	84	47.42	0.181838	118
chr6_90_tRNAAla_AGC-	TRA-AGC17-1	chr6:58187444-58187516	chr6	58187444	58187516	II	64	33	48.5	231	31.33	1.73329	291	29.62	2.03181	1.88255	O		35	40	37.5	86	17.9	0.781165	69	27.89	0.552541	0.666853	NO		42	43	42.5	91	33.33	0.738954	120	25.82	1.04891	0.893932	NO		66	70	68	59	37.22	-0.138976	70
chr6_89_tRNAAla_AGC-	TRA-AGC16-1	chr6:58196623-58196695	chr6	58196623	58196695	II	75	46	60.5	476	0	2.48315	583	0	2.7599	2.62152	O		60	26	43	129	0	1.12306	124	0	1.07696	1.10001	NO		23	29	26	212	0	2.11151	230	0.43	2.21501	2.16326	O		53	38	45.5	132	0	1.10145	127
chr6_81_tRNALeu_TAA+	TRL-TAA5-1	chr6:69914378-69914460	chr6	69914378	69914460	II	25	14	19.5	6	0	-0.459432	16	0	-0.105795	-0.282613	NO		0	12	6	14	0	0.289507	10	0	0.152003	0.220755	NO		4	8	6	12	0	0.222392	16	0	0.353637	0.288015	NO		2	4	3	15	0	0.447459	11
chr6_88_Pseudo_GAA-	TRF-GAA8-1	chr6:79668010-79668082	chr6	79668010	79668082	II	4	11	7.5	12	0	0.163499	10	0	0.0931094	0.128304	NO		6	6	6	15	0	0.321928	9	0	0.115477	0.218703	NO		2	6	4	18	0	0.4975	7	0	0.121991	0.309745	NO		4	8	6	13	0	0.25634	10
AluJo_SINE_Alu	N/A	chr6:111563459-111563761	chr6	111563459	111563761	II	64	35	49.5	932	0	3.59701	1070	0	3.7904	3.69371	O		56	26	41	323	0	2.31378	292	0	2.18117	2.24747	O		62	21	41.5	764	0	3.47312	726	0	3.40237	3.43775	O		19	60	39.5	204	0	1.75142	225
chr6_87_tRNAGlu_CTC-	TRE-CTC1-7	chr6:126101393-126101464	chr6	126101393	126101464	II	43	18	30.5	6798	0	6.81838	7170	0	6.89492	6.85665	O		6	13	9.5	4301	0	6.7767	4079	0	6.70079	6.73875	O		14	37	25.5	6508	0	6.88022	5602	0	6.66502	6.77262	O		15	23	19	3862	0	6.31159	3770
chr6_82_tRNAGly_GCC+	TRG-GCC6-1	chr6:142578776-142578846	chr6	142578776	142578846	II	45	9	27	60	0	0.658963	73	0	0.853611	0.756287	NO		30	35	32.5	63	0	0.573375	61	0	0.54201	0.557692	NO		142	54	98	78	0	-0.245112	88	0	-0.117357	-0.181235	NO		118	92	105	63	0	-0.537657	61
chr6_83_tRNALeu_TAA+	TRL-TAA1-1	chr6:144537684-144537766	chr6	144537684	144537766	II	28	37	32.5	8605	0	7.1102	10520	0	7.39917	7.25468	O		37	72	54.5	7287	0	6.43616	5667	0	6.07511	6.25563	O		43	69	56	7972	0	6.53988	8195	0	6.57954	6.55971	O		30	45	37.5	4992	0	6.21723	5259
chr6_84_tRNAGln_TTG+	TRQ-TTG4-1	chr6:145503859-145503930	chr6	145503859	145503930	II	18	48	33	71	0	0.680932	98	0	1.02272	0.851826	NO		28	30	29	42	0	0.287282	46	0	0.365284	0.326283	NO		30	43	36.5	55	0	0.354109	60	0	0.436571	0.39534	NO		53	16	34.5	50	0	0.310701	59
chr6_86_Pseudo_TAC-	NMTRV-TAC1-1	chr6:156869046-156869120	chr6	156869046	156869120	II	37	19	28	56	0	0.568284	45	0	0.370838	0.469561	NO		29	30	29.5	31	0	0.0359196	46	0	0.35311	0.194515	NO		50	36	43	28	0	-0.331844	57	0	0.253119	-0.0393623	NO		77	20	48.5	46	0	-0.0466932	66
chr6_85_Pseudo_TTC-	TRE-TTC15-1	chr6:163210014-163210082	chr6	163210014	163210082	II	0	7	3.5	4	0	0.0213737	9	0	0.219313	0.120343	NO		9	4	6.5	6	0	-0.0198996	5	0	-0.0605415	-0.0402205	NO		5	0	2.5	10	0	0.29956	5	0	0.106915	0.203238	NO		1	4	2.5	12	0	0.36995	7
chr7_26_Pseudo_TTG-	NMTRQ-TTG13-1	chr7:57253980-57254051	chr7	57253980	57254051	II	2	6	4	19	0	0.527247	18	0	0.4975	0.512373	NO		3	0	1.5	28	0	0.880701	12	0	0.415037	0.647869	NO		15	8	11.5	21	0	0.297386	23	0	0.352881	0.325133	NO		3	4	3.5	19	0	0.548621	16
AluY_SINE_Alu_80572362	N/A	chr7:80572362-80572508	chr7	80572362	80572508	II	8	30	19	936	0	4.30117	951	0	4.3234	4.31228	O		17	21	19	131	0	1.71621	121	0	1.62369	1.66995	O		29	16	22.5	225	0	2.28011	154	0	1.80932	2.04471	O		16	12	14	117	0	1.74024	103
chr7_1_tRNATrp_CCA+	TRW-CCA5-1	chr7:99067307-99067378	chr7	99067307	99067378	II	38	92	65	105	0	0.50696	121	0	0.668549	0.587755	NO		33	104	68.5	60	0	-0.130199	42	0	-0.452127	-0.291163	NO		73	32	52.5	80	0	0.415037	57	0	0.0766213	0.245829	NO		82	55	68.5	44	0	-0.412598	58
chr7_2_tRNAPro_AGG+	TRP-AGG2-3	chr7:128423504-128423575	chr7	128423504	128423575	II	91	93	92	9733	0	6.32237	11465	0	6.55798	6.44018	O		138	75	106.5	7032	0	5.6931	5957	0	5.45486	5.57398	O		110	90	100	9174	0	6.14568	9339	0	6.17131	6.15849	O		60	51	55.5	5336	0	5.97178	5774
chr7_3_tRNAArg_CCT+	TRR-CCT4-1	chr7:139025446-139025518	chr7	139025446	139025518	II	104	62	83	13148	0	6.86566	14869	0	7.04275	6.95421	O		74	52	63	10075	0	6.76362	8258	0	6.47765	6.62064	O		50	89	69.5	11696	0	6.8808	12702	0	6.99955	6.94017	O		56	76	66	7084	0	6.21148	9016
chr7_4_Pseudo_TTG+	NMTRQ-TTG2-1	chr7:141503357-141503428	chr7	141503357	141503428	II	9	16	12.5	22	0	0.291049	16	0	0.114171	0.20261	NO		1	13	7	26	0	0.597902	20	0	0.434403	0.516152	NO		0	28	14	22	0	0.241008	11	0	-0.10188	0.0695642	NO		8	5	6.5	10	0	0.132104	11
hY5_RNA	RNY5	chr7:148638579-148638663	chr7	148638579	148638663	III	0	2	1	3245	0	6.72308	3636	0	6.88579	6.80444	O		5	6	5.5	2282	0	6.02518	2073	0	5.88849	5.95683	O		5	0	2.5	3170	0	6.62149	3256	0	6.65975	6.64062	O		1	10	5.5	2278	0	6.02268	2290
hY4_RNA	RNY4	chr7:148660406-148660499	chr7	148660406	148660499	III	36	6	21	2549	0	5.66017	2613	0	5.69554	5.67785	O		15	7	11	1741	0	5.4328	1794	0	5.47534	5.45407	O		15	27	21	2799	0	5.79365	2268	0	5.49374	5.64369	O		8	24	16	1993	0	5.45872	1775
hY3_RNA	RNY3	chr7:148680846-148680947	chr7	148680846	148680947	III	67	38	52.5	6235	0	6.24678	7300	0	6.47328	6.36003	O		50	50	50	4278	0	5.75087	4030	0	5.66534	5.70811	O		21	9	15	6224	0	7.11871	6070	0	7.08274	7.10073	O		40	35	37.5	3692	0	5.78505	4045
hY1_RNA	RNY1	chr7:148684228-148684340	chr7	148684228	148684340	III	12	40	26	4822	0	6.43701	5422	0	6.60521	6.52111	O		8	38	23	3358	0	5.9983	3098	0	5.8831	5.9407	O		28	14	21	5138	0	6.66297	4326	0	6.41636	6.53966	O		9	27	18	3298	0	6.11548	3399
chr7_5_tRNACys_GCA+	TRC-GCA1-1	chr7:149007281-149007352	chr7	149007281	149007352	II	17	8	12.5	1307	0	4.97539	1505	0	5.17463	5.07501	O		30	0	15	540	0	3.66297	560	0	3.71272	3.68784	O		10	28	19	895	0	4.2386	778	0	4.0435	4.14105	O		5	25	15	566	0	3.72732	575
chr7_6_tRNACys_GCA+	TRC-GCA9-2	chr7:149028220-149028291	chr7	149028220	149028291	II	93	46	69.5	991	0	3.35914	1190	0	3.61604	3.48759	O		74	20	47	362	0	2.34792	391	0	2.45089	2.39941	O		116	33	74.5	574	0	2.53105	530	0	2.42192	2.47648	O		48	40	44	402	0	2.54543	409
chr7_25_tRNACys_GCA-	TRC-GCA13-1	chr7:149052766-149052837	chr7	149052766	149052837	II	25	57	41	388	0	2.55761	447	0	2.7481	2.65286	O		46	100	73	149	0	0.797315	146	0	0.772931	0.785123	NO		78	39	58.5	216	0	1.47491	220	0	1.49818	1.48654	NO		68	60	64	157	0	0.992306	158
chr7_24_Pseudo_GTA-	TRY-GTA11-1	chr7:149053745-149053820	chr7	149053745	149053820	II	13	16	14.5	26	0	0.331621	25	0	0.305626	0.318624	NO		18	27	22.5	25	0	0.0671142	22	0	-0.0138058	0.0266542	NO		8	13	10.5	20	0	0.304006	39	0	0.768674	0.53634	NO		12	23	17.5	33	0	0.407424	34
chr7_23_tRNACys_GCA-	TRC-GCA18-1	chr7:149072850-149072921	chr7	149072850	149072921	II	24	40	32	214	0	1.97654	259	0	2.22073	2.09864	O		39	16	27.5	71	0	0.812721	77	0	0.895977	0.854349	NO		26	29	27.5	93	0	1.09702	74	0	0.85495	0.975987	NO		110	31	70.5	92	0	0.279686	77
chr7_22_tRNACys_GCA-	TRC-GCA10-1	chr7:149074601-149074672	chr7	149074601	149074672	II	38	19	28.5	314	0	2.5559	332	0	2.62948	2.59269	O		28	43	35.5	113	0	1.12645	106	0	1.05404	1.09024	NO		30	36	33	145	0	1.47393	141	0	1.44057	1.45725	NO		27	47	37	131	0	1.26483	131
chr7_21_tRNACys_GCA-	TRC-GCA11-1	chr7:149112229-149112300	chr7	149112229	149112300	II	45	38	41.5	45	0	0.0689474	52	0	0.197681	0.133314	NO		63	29	46	22	0	-0.547488	32	0	-0.293731	-0.420609	NO		55	13	34	34	0	0	39	0	0.108524	0.0542622	NO		34	24	29	39	0	0.225881	36
chr7_7_tRNACys_GCA+	TRC-GCA16-1	chr7:149243631-149243702	chr7	149243631	149243702	II	23	65	44	118	0	1	83	0	0.610726	0.805363	NO		39	64	51.5	55	0	0.0606628	54	0	0.0435893	0.052126	NO		29	25	27	69	0	0.796467	74	0	0.86755	0.832008	NO		5	36	20.5	59	0	0.817522	52
chr7_8_tRNACys_GCA+	TRC-GCA22-1	chr7:149253802-149253873	chr7	149253802	149253873	II	14	41	27.5	116	1.19	1.34433	136	1.91	1.52955	1.43694	NO		61	56	58.5	67	3.87	0.132307	74	2.53	0.232834	0.182571	NO		92	41	66.5	93	1.49	0.350057	100	0.99	0.429911	0.389984	NO		45	51	48	98	2.65	0.714598	83
chr7_9_tRNATyr_GTA+	TRY-GTA10-1	chr7:149255133-149255205	chr7	149255133	149255205	II	52	51	51.5	47	0	-0.0819416	63	0	0.190431	0.0542445	NO		75	12	43.5	58	0	0.259759	45	0	0.0291463	0.144453	NO		19	31	25	50	0	0.540568	57	0	0.661584	0.601076	NO		25	45	35	38	0	0.065095	58
chr7_10_tRNACys_GCA+	TRC-GCA15-1	chr7:149281816-149281887	chr7	149281816	149281887	II	41	95	68	91	0	0.304153	116	0	0.575115	0.439634	NO		32	23	27.5	56	0	0.580775	67	0	0.754423	0.667599	NO		43	55	49	85	0	0.541709	78	0	0.451107	0.496408	NO		60	46	53	60	0	0.116814	77
chr7_20_tRNACys_GCA-	TRC-GCA3-1	chr7:149286164-149286235	chr7	149286164	149286235	II	63	71	67	80	0	0.181447	69	0	0.0294438	0.105445	NO		53	30	41.5	67	0	0.440042	61	0	0.347923	0.393982	NO		24	14	19	107	0	1.48332	121	0	1.62369	1.55351	O		67	28	47.5	55	0	0.133267	60
chr7_19_tRNACys_GCA-	TRC-GCA23-1	chr7:149292305-149292376	chr7	149292305	149292376	II	95	27	61	60	0	-0.0159415	115	0	0.672114	0.328086	NO		100	21	60.5	59	0	-0.0241125	51	1.85	-0.159996	-0.0920542	NO		35	25	30	50	0	0.415037	83	0.59	0.913288	0.664163	NO		71	55	63	49	0.86	-0.235378	60
chr7_11_tRNACys_GCA+	TRC-GCA20-1	chr7:149295046-149295117	chr7	149295046	149295117	II	27	26	26.5	98	1.4	1.17982	87	2.99	1.05019	1.115	NO		17	53	35	58	4.42	0.437064	58	3.22	0.437064	0.437064	NO		41	73	57	78	1.77	0.311944	85	1.16	0.402547	0.357245	NO		6	36	21	59	4.34	0.803308	66
chr7_12_tRNASer_AGA+	TRS-AGA5-1	chr7:149305467-149305538	chr7	149305467	149305538	II	50	86	68	149	0	0.869106	161	0	0.962719	0.915912	NO		40	69	54.5	77	0	0.340588	86	0	0.457102	0.398845	NO		79	36	57.5	146	0	1.00822	164	0	1.1487	1.07846	NO		26	51	38.5	105	0	0.978784	102
chr7_18_tRNACys_GCA-	TRC-GCA19-1	chr7:149310156-149310227	chr7	149310156	149310227	II	87	59	73	44	0	-0.477047	73	0	0	-0.238524	NO		108	63	85.5	30	0	-0.944858	53	0	-0.47671	-0.710784	NO		40	21	30.5	42	0	0.251062	56	0	0.507402	0.379232	NO		30	25	27.5	45	0	0.383329	64
chr7_13_tRNACys_GCA+	TRC-GCA9-3	chr7:149332778-149332849	chr7	149332778	149332849	II	28	44	36	403	0	2.71383	463	0	2.90105	2.80744	O		60	41	50.5	165	0	1.27641	120	0	0.897902	1.08716	NO		38	48	43	270	0	2.03899	245	0	1.91346	1.97623	O		38	43	40.5	151	0	1.36029	175
chr7_17_tRNACys_GCA-	TRC-GCA12-1	chr7:149344046-149344117	chr7	149344046	149344117	II	28	14	21	460	0	3.26421	563	0	3.53946	3.40184	O		41	30	35.5	170	0	1.61043	144	0	1.40952	1.50998	NO		15	20	17.5	238	0	2.49623	229	0	2.44695	2.47159	O		42	20	31	164	0	1.66918	191
chr7_14_tRNACys_GCA+	TRC-GCA21-1	chr7:149361915-149361986	chr7	149361915	149361986	II	26	50	38	256	0	2.07241	330	0	2.40439	2.2384	O		26	69	47.5	134	0	1.08143	103	0.91	0.779158	0.930293	NO		4	23	13.5	136	0	1.9321	143	0.34	1.99168	1.96189	O		27	13	20	102	0.42	1.40054	112
chr7_16_tRNACys_GCA-	TRC-GCA17-1	chr7:149388272-149388343	chr7	149388272	149388343	II	44	92	68	2106	0	4.44599	2255	0	4.54327	4.49463	O		48	70	59	796	0	3.21426	695	0	3.0261	3.12018	O		17	67	42	1454	0	4.36535	1261	0	4.16435	4.26485	O		52	58	55	819	0	3.32023	792
chr7_15_tRNACys_GCA+	TRC-GCA9-4	chr7:149404760-149404831	chr7	149404760	149404831	II	21	61	41	1416	0	4.3481	1547	0	4.47322	4.41066	O		28	49	38.5	618	0	3.24182	555	0	3.09426	3.16804	O		20	27	23.5	846	0	4.03332	807	0	3.96762	4.00047	O		44	49	46.5	660	0	3.17306	608
chr8_1_Pseudo_CTC+	TRE-CTC11-1	chr8:11793380-11793451	chr8	11793380	11793451	II	0	3	1.5	12	0	0.415037	12	0	0.415037	0.415037	NO		16	10	13	10	0	-0.104337	6	0	-0.25634	-0.180338	NO		6	0	3	5	0	0.0848889	6	0	0.125531	0.10521	NO		0	9	4.5	14	0	0.350907	9
chr8_2_Pseudo_TTT+	TRK-TTT17-1	chr8:18120203-18120272	chr8	18120203	18120272	II	12	50	31	31	0	0	36	0	0.113657	0.0568284	NO		29	0	14.5	22	0	0.224706	37	0	0.590356	0.407531	NO		32	13	22.5	39	0	0.394279	26	0	0.0931094	0.243694	NO		26	24	25	32	0	0.172837	33
chr8_14_Pseudo_TTG-	NMTRQ-TTG11-1	chr8:32872646-32872717	chr8	32872646	32872717	II	7	20	13.5	20	0	0.200913	15	0	0.0489096	0.124911	NO		4	21	12.5	21	0	0.263034	19	0	0.205319	0.234177	NO		1	35	18	12	0	-0.192645	18	0	0	-0.0963225	NO		30	12	21	19	0	-0.0577155	26
chr8_13_Pseudo_TAA-	NMTRL-TAA6-1	chr8:47740038-47740112	chr8	47740038	47740112	II	17	22	19.5	18	0	-0.0443941	26	0	0.177998	0.0668021	NO		6	30	18	20	0	0.0588937	14	0	-0.125531	-0.0333186	NO		8	25	16.5	26	0	0.268196	28	0	0.318822	0.293509	NO		8	24	16	26	0	0.283793	26
chr8_3_tRNAGlu_CTC+	TRE-CTC5-1	chr8:59504798-59504868	chr8	59504798	59504868	II	9	34	21.5	7	0	-0.477047	9	0	-0.401098	-0.439073	NO		13	12	12.5	8	0	-0.161463	11	0	-0.0518389	-0.106651	NO		9	12	10.5	11	0	0.017702	10	0	-0.0179219	-0.000109953	NO		4	19	11.5	8	0	-0.127112	11
chr8_12_tRNATyr_GTA_I-	TRY-GTA9-1	chr8:66609532-66609619	chr8	66609532	66609619	II	54	62	58	41	0	-0.309684	34	0	-0.459432	-0.384558	NO		43	74	58.5	51	0	-0.127756	57	0	-0.0246621	-0.0762088	NO		121	66	93.5	47	0	-0.681581	63	0	-0.409208	-0.545395	NO		4	40	22	51	0	0.63941	39
chr8_4_tRNATyr_GTA_I+	TRY-GTA5-1	chr8:67025602-67025694	chr8	67025602	67025694	II	73	119	96	13777	0	6.77583	15927	0	6.98462	6.88023	O		71	100	85.5	7109	0	5.94976	5951	0	5.69442	5.82209	O		54	63	58.5	10904	0	6.94893	11280	0	6.99771	6.97332	O		105	85	95	5691	0	5.51627	5604
chr8_5_tRNATyr_GTA_I+	TRY-GTA5-2	chr8:67026223-67026311	chr8	67026223	67026311	II	42	43	42.5	10103	0	7.12686	13437	0	7.53723	7.33205	O		59	44	51.5	4628	0	5.83677	3856	0	5.57534	5.70605	O		40	64	52	7463	0	6.51378	8285	0	6.66395	6.58886	O		49	65	57	2925	0	5.086	3068
chr8_6_tRNAAla_AGC+	TRA-AGC8-2	chr8:67026424-67026496	chr8	67026424	67026496	II	80	37	58.5	9490	0	6.74914	12493	0	7.14469	6.94691	O		24	24	24	5515	0	6.68208	4690	0	6.44968	6.56588	O		30	47	38.5	7486	0	6.77772	8716	0	6.99638	6.88705	O		38	13	25.5	3694	0	6.06822	3947
chr8_7_Pseudo_CTC+	TRE-CTC14-1	chr8:70072340-70072414	chr8	70072340	70072414	II	6	22	14	23	0	0.268489	32	0	0.494765	0.381627	NO		8	38	23	25	0	0.0534393	33	0	0.249359	0.151399	NO		24	39	31.5	21	0	-0.270089	32	0	0.0116818	-0.129204	NO		11	28	19.5	28	0	0.228624	21
HUERS-P1_LTR_ERV1	N/A	chr8:90416283-90416678	chr8	90416283	90416678	other	24	62	43	882	0	3.64307	900	0	3.67126	3.65716	O		28	89	58.5	445	0	2.42418	415	0	2.33006	2.37712	O		12	21	16.5	665	0	3.90171	471	0	3.42951	3.66561	O		16	13	14.5	429	0	3.36662	393
5S_rRNA-related_8	RN5S@	chr8:93179688-93179778	chr8	93179688	93179778	I	2	14	8	18	0	0.337035	8	0	0	0.168517	NO		26	9	17.5	12	0	-0.177538	13	0	-0.143591	-0.160565	NO		2	17	9.5	6	0	-0.133856	12	0	0.0885367	-0.0226595	NO		5	12	8.5	26	0	0.540568	9
chr8_11_tRNASer_AGA-	TRS-AGA2-5	chr8:96281885-96281966	chr8	96281885	96281966	II	35	72	53.5	14707	0	7.46345	16985	0	7.67082	7.56713	O		25	40	32.5	9379	0	7.23404	8792	0	7.14111	7.18757	O		64	48	56	13228	0	7.26831	13660	0	7.31457	7.29144	O		40	75	57.5	7731	0	6.47082	8842
chr8_8_tRNAUndet_???+	TRU-NNN2-1	chr8:99153462-99153530	chr8	99153462	99153530	II	8	20	14	26	0	0.347923	28	0	0.398549	0.373236	NO		15	23	19	26	0	0.192645	23	0	0.113211	0.152928	NO		36	14	25	33	0	0.19592	27	0	0.0515303	0.123725	NO		3	17	10	30	0	0.584963	25
chr8_10_tRNAMet_CAT-	TRM-CAT1-1	chr8:124169470-124169542	chr8	124169470	124169542	II	95	109	102	12630	0	6.5836	14006	0	6.73245	6.65802	O		154	112	133	9223	0	5.82698	7947	0	5.6129	5.71994	O		83	90	86.5	10192	0	6.4552	12835	0	6.78698	6.62109	O		119	70	94.5	7615	0	5.9403	8476
chr8_9_Pseudo_GAA-	TRF-GAA12-1	chr8:124270725-124270797	chr8	124270725	124270797	II	9	22	15.5	23	0	0.220126	34	0	0.492205	0.356166	NO		14	23	18.5	34	0	0.400087	29	0	0.28273	0.341409	NO		10	13	11.5	33	0	0.60224	27	0	0.457851	0.530046	NO		13	19	16	21	0	0.148863	20
chr9_8_tRNAGln_TTG-	NMTRQ-TTG14-1	chr9:5095085-5095156	chr9	5095085	5095156	II	5	14	9.5	19	0	0.310929	15	0	0.188072	0.249501	NO		9	24	16.5	7	0	-0.329705	16	0	-0.0155969	-0.172651	NO		4	8	6	21	0	0.5025	14	0	0.289507	0.396003	NO		5	20	12.5	26	0	0.397964	31
chr9_7_tRNAHis_GTG-	TRH-GTG1-6	chr9:14433938-14434009	chr9	14433938	14434009	II	23	25	24	1013	0	4.27164	1123	0	4.41629	4.34396	O		13	3	8	411	0	3.53671	397	0	3.49016	3.51344	O		39	10	24.5	608	0	3.54923	562	0	3.44127	3.49525	O		13	6	9.5	267	0	2.91054	300
chr9_1_tRNAMet_CAT+	TRX-CAT3-1	chr9:19403996-19404070	chr9	19403996	19404070	II	75	49	62	29	0	-0.640919	49	0	-0.219781	-0.43035	NO		53	24	38.5	45	0	0.130787	51	0	0.241818	0.186302	NO		36	48	42	45	0	0.0588937	44	0	0.0395284	0.049211	NO		40	39	39.5	50	0	0.202987	48
RNaseMRP_RNA	RMRP	chr9:35657749-35658014	chr9	35657749	35658014	III	215	65	140	24035	0	7.14526	27836	0	7.35683	7.25104	O		128	141	134.5	18253	0	6.79627	14370	0	6.45184	6.62405	O		182	151	166.5	18883	0	6.58871	23720	0	6.91725	6.75298	O		186	115	150.5	11042	0	5.93877	13464
5S_rRNA-related_9	RN5S@	chr9:66458015-66458415	chr9	66458015	66458415	I	133	194	163.5	1142	0.4	2.59857	1369	0.22	2.85399	2.72628	O		115	249	182	561	0.55	1.47909	317	0.14	0.710871	1.09498	NO		200	215	207.5	958	0.33	2.05658	733	0.33	1.68376	1.87017	O		164	328	246	325	0.93	0.363151	327
MIRb_SINE_MIR_75003721	N/A	chr9:75003721-75003918	chr9	75003721	75003918	II	8	30	19	256	0	2.54516	285	0	2.6845	2.61483	O		29	15	22	71	0	0.957772	91	0	1.21842	1.0881	NO		6	17	11.5	166	0	2.23967	128	0	1.92874	2.08421	O		4	1	2.5	122	0	2.22556	107
chr9_6_tRNAAsp_GTC-	TRD-GTC4-1	chr9:77517990-77518061	chr9	77517990	77518061	II	26	73	49.5	23	0.49	-0.584963	40	0	-0.1836	-0.384281	NO		47	41	44	23	1.12	-0.481533	39	0.8	-0.100929	-0.291231	NO		37	27	32	23	4	-0.226276	28	0.44	-0.0962153	-0.161246	NO		30	40	35	21	1.03	-0.349942	18
chr9_2_tRNAArg_TCG+	TRR-TCG6-1	chr9:112960803-112960875	chr9	112960803	112960875	II	37	8	22.5	153	0	1.80145	162	0	1.87072	1.83609	O		52	23	37.5	53	0	0.298224	50	0	0.245112	0.271668	NO		38	25	31.5	89	0	0.952303	108	0	1.16601	1.05916	NO		45	30	37.5	51	0	0.263034	54
chr9_3_tRNATrp_CCA_I+	TRW-CCA6-1	chr9:115616989-115617087	chr9	115616989	115617087	II	57	53	55	49	0	-0.10561	48	0	-0.123989	-0.114799	NO		46	30	38	41	0	0.0622843	43	0	0.102362	0.082323	NO		104	33	68.5	42	0	-0.452127	49	0	-0.318271	-0.385199	NO		59	42	50.5	45	0	-0.102098	35
chr9_5_tRNAGln_CTG-	TRQ-CTG15-1	chr9:126655522-126655594	chr9	126655522	126655594	II	43	17	30	62	0	0.616671	82	0	0.900464	0.758568	NO		27	21	24	58	0	0.704544	52	0	0.602665	0.653604	NO		15	24	19.5	61	0	0.878438	53	0	0.745683	0.81206	NO		2	15	8.5	41	0	0.882961	50
chr9_4_tRNAArg_TCT_I-	TRR-TCT3-1	chr9:131102355-131102445	chr9	131102355	131102445	II	83	46	64.5	532	0	2.57218	609	0	2.75743	2.66481	O		64	78	71	171	0	0.99284	108	0	0.450313	0.721577	NO		29	60	44.5	317	0	2.21962	290	0	2.10276	2.16119	O		79	62	70.5	120	0	0.577767	134
RNU6ATAC	RNU6ATAC	chr9:137029561-137029686	chr9	137029561	137029686	III	42	28	35	6988	0	6.75448	8912	0	7.10401	6.92925	O		27	41	34	5104	0	6.32587	4370	0	6.10329	6.21458	O		10	46	28	6404	0	6.79352	6762	0	6.87164	6.83258	O		8	35	21.5	3262	0	5.99825	3677
chr10_6_tRNAVal_TAC-	TRV-TAC3-1	chr10:5895674-5895746	chr10	5895674	5895746	II	30	30	30	425	0	2.92283	503	0	3.1511	3.03697	O		8	23	15.5	215	0	2.42884	143	0	1.92683	2.17784	O		0	5	2.5	276	0	3.23502	302	0	3.35267	3.29385	O		13	31	22	178	0	2	165
chr10_5_Pseudo_CTG-	NMTRQ-CTG1-1	chr10:20036608-20036682	chr10	20036608	20036682	II	18	7	12.5	16	0	0.114171	13	0	0.0168738	0.0655224	NO		40	10	25	12	0	-0.389042	12	0	-0.389042	-0.389042	NO		7	9	8	24	0	0.50696	18	0	0.337035	0.421997	NO		6	12	9	18	0	0.29956	22
chr10_4_tRNAAsn_GTT-	TRN-GTT2-3	chr10:22518438-22518511	chr10	22518438	22518511	II	55	55	55	9828	0	6.85769	10951	0	7.01333	6.93551	O		24	72	48	5505	0	6.14897	4577	0	5.88421	6.01659	O		27	54	40.5	8144	0	6.85728	7684	0	6.77371	6.81549	O		1	87	44	4406	0	5.90559	4434
chr10_1_Pseudo_GGG+	TRP-GGG1-1	chr10:22852579-22852651	chr10	22852579	22852651	II	9	39	24	32	0	0.199309	23	0	-0.026967	0.0861709	NO		58	16	37	28	0	-0.208108	29	0	-0.183446	-0.195777	NO		13	25	19	26	0	0.192645	25	0	0.16665	0.179647	NO		1	19	10	33	0	0.655352	31
MIR_SINE_MIR_25183668	N/A	chr10:25183668-25183785	chr10	25183668	25183785	II	18	67	42.5	538	0	2.96984	548	0	2.99502	2.98243	O		42	67	54.5	238	0	1.66521	208	0	1.49394	1.57957	NO		64	28	46	386	0	2.45251	345	0	2.30282	2.37767	O		55	72	63.5	158	0	1.00769	188
chr10_3_Pseudo_CAA-	TRL-CAA7-1	chr10:34591416-34591483	chr10	34591416	34591483	II	21	13	17	29	0	0.328054	33	0	0.422691	0.375373	NO		46	13	29.5	26	0	-0.0874628	38	0	0.192645	0.0525911	NO		37	56	46.5	24	0	-0.5025	35	0	-0.23502	-0.36876	NO		17	36	26.5	25	0	-0.0388192	41
AluSx_SINE_Alu_50595434	N/A	chr10:50595434-50595544	chr10	50595434	50595544	II	87	57	72	2264	0	4.49122	2736	0	4.76116	4.62619	O		36	43	39.5	324	0	2.34866	247	0	1.9948	2.17173	O		42	86	64	491	0	2.47055	548	0	2.62034	2.54544	O		44	32	38	231	0	1.94044	258
chr10_2_tRNASer_TGA+	TRS-TGA1-1	chr10:69524261-69524342	chr10	69524261	69524342	II	50	70	60	10513	0	6.87214	11876	0	7.04755	6.95985	O		31	46	38.5	6939	0	6.6687	4284	0	5.97678	6.32274	O		15	28	21.5	9138	0	7.47589	8523	0	7.37571	7.4258	O		37	68	52.5	4989	0	5.92686	5609
MIR_SINE_MIR_103806446	N/A	chr10:103806446-103806520	chr10	103806446	103806520	II	63	65	64	771	0	3.09107	874	0	3.26559	3.17833	O		71	38	54.5	351	0	2.17277	282	0	1.88452	2.02865	O		73	83	78	590	0	2.52124	577	0	2.49067	2.50595	O		33	46	39.5	299	0	2.243	333
chr11_1_tRNALeu_CAA+	TRL-CAA5-1	chr11:9296790-9296863	chr11	9296790	9296863	II	50	33	41.5	19	0	-0.545161	29	0	-0.277228	-0.411195	NO		19	44	31.5	26	0	-0.13516	26	0	-0.13516	-0.13516	NO		20	28	24	33	0	0.222392	18	0	-0.169925	0.0262337	NO		28	34	31	23	0	-0.202817	26
OTHER1_RP3TR1	N/A	chr11:35548169-35548261	chr11	35548169	35548261	other	38	44	41	8353	0	6.8835	10441	0	7.20436	7.04393	O		56	29	42.5	2679	0	5.22364	2466	0	5.10549	5.16456	O		50	39	44.5	5385	0	6.18358	5587	0	6.23642	6.21	O		39	61	50	1691	0	4.4271	2092
chr11_19_tRNATrp_CCA-	TRW-CCA7-1	chr11:45290200-45290273	chr11	45290200	45290273	II	12	39	25.5	45	0	0.434403	53	0	0.580624	0.507513	NO		24	52	38	33	0	-0.110183	41	0	0.0622843	-0.0239493	NO		79	8	43.5	47	0	0.0671142	51	0	0.140178	0.103646	NO		60	30	45	46	0	0.0191088	50
chr11_18_tRNAAla_TGC-	TRA-TGC8-1	chr11:50233879-50233950	chr11	50233879	50233950	II	8	37	22.5	24	0	0.040642	20	0	-0.0703893	-0.0148737	NO		6	64	35	20	0	-0.378512	34	0	-0.0223678	-0.20044	NO		37	32	34.5	25	0	-0.229868	19	0	-0.396517	-0.313192	NO		44	31	37.5	18	0	-0.491853	22
chr11_2_tRNALys_CTT+	TRK-CTT15-1	chr11:51359900-51359972	chr11	51359900	51359972	II	0	0	0	0	0	0	0	0	0	0	NO		0	0	0	0	0	0	0	0	0	0	NO		0	0	0	0	0	0	0	0	0	0	NO		0	0	0	0	0	0	0
chr11_17_tRNAVal_TAC-	TRV-TAC1-1	chr11:59318102-59318174	chr11	59318102	59318174	II	19	61	40	16094	0	7.84764	19134	0	8.09683	7.97223	O		37	100	68.5	6473	0	6.04484	6218	0	5.98713	6.01598	O		31	50	40.5	14298	0	7.667	15482	0	7.78155	7.72427	O		34	47	40.5	4993	0	6.15478	5692
chr11_16_tRNAVal_TAC-	TRV-TAC2-1	chr11:59318460-59318532	chr11	59318460	59318532	II	60	43	51.5	14752	0	7.50283	17632	0	7.75963	7.63123	O		79	103	91	5145	0	5.41848	4578	0	5.25106	5.33477	O		36	105	70.5	11928	0	6.89464	12122	0	6.91785	6.90625	O		57	40	48.5	3641	0	5.54734	4049
chr11_3_tRNAArg_TCT_I+	TRR-TCT3-2	chr11:59318767-59318852	chr11	59318767	59318852	II	52	53	52.5	9511	0	6.8536	11351	0	7.10802	6.98081	O		54	66	60	2362	0	4.73215	2408	0	4.75963	4.74589	O		10	102	56	6953	0	6.34337	6927	0	6.33798	6.34068	O		32	43	37.5	1761	0	4.72973	2027
chr11_4_tRNALeu_TAA+	TRL-TAA3-1	chr11:59319228-59319310	chr11	59319228	59319310	II	18	28	23	5691	0	6.75413	6090	0	6.8514	6.80276	O		10	15	12.5	2094	0	5.64318	2137	0	5.67209	5.65763	O		6	28	17	5042	0	6.75375	4281	0	6.51922	6.63648	O		8	25	16.5	1983	0	5.43597	1948
chr11_5_tRNALys_TTT+	TRK-TTT5-1	chr11:59323902-59323974	chr11	59323902	59323974	II	25	53	39	5995	0	6.44822	6152	0	6.48533	6.46678	O		33	7	20	2140	0	5.43962	2076	0	5.39643	5.41803	O		13	40	26.5	5450	0	6.59978	4312	0	6.26397	6.43187	O		33	21	27	1841	0	5.0367	1681
chr11_15_tRNAPhe_GAA-	TRF-GAA1-3	chr11:59324970-59325042	chr11	59324970	59325042	II	47	76	61.5	7642	0	6.38969	7727	0	6.40558	6.39764	O		32	40	36	1885	0	4.85873	1602	0	4.62803	4.74338	O		44	24	34	6238	0	6.61379	5229	0	6.36057	6.48718	O		19	54	36.5	1243	0	4.25873	1209
chr11_14_tRNALys_TTT-	TRK-TTT3-4	chr11:59327808-59327880	chr11	59327808	59327880	II	36	19	27.5	7935	0	7.11397	7809	0	7.09096	7.10247	O		36	20	28	4234	0	6.20001	4118	0	6.16022	6.18011	O		29	52	40.5	6429	0	6.51754	6801	0	6.59833	6.55794	O		53	60	56.5	3756	0	5.45183	3922
chr11_13_tRNAPhe_GAA-	TRF-GAA2-1	chr11:59333853-59333925	chr11	59333853	59333925	II	34	19	26.5	10889	0	7.59437	12482	0	7.79085	7.69261	O		67	7	37	3817	0	5.84343	3716	0	5.80505	5.82424	O		32	55	43.5	9883	0	7.07543	9548	0	7.02584	7.05064	O		26	42	34	3015	0	5.57223	3105
chr11_6_Pseudo_TGC+	TRA-TGC10-1	chr11:60763508-60763577	chr11	60763508	60763577	II	50	54	52	75	0	0.356694	69	0	0.271805	0.314249	NO		67	115	91	57	0	-0.47592	66	0	-0.333901	-0.40491	NO		101	54	77.5	71	0	-0.0899814	68	0	-0.133483	-0.111732	NO		105	54	79.5	59	0	-0.299054	70
chr11_7_Pseudo_CCT+	TRR-CCT9-1	chr11:63661767-63661835	chr11	63661767	63661835	II	54	43	48.5	37	0	-0.228532	31	0	-0.363883	-0.296207	NO		33	38	35.5	49	0	0.270358	39	0	0.0751015	0.17273	NO		43	47	45	49	0	0.0749621	51	0	0.111031	0.0929967	NO		61	118	89.5	35	0	-0.878499	40
chr11_8_tRNASer_GCT+	TRS-GCT3-1	chr11:66115591-66115672	chr11	66115591	66115672	II	97	30	63.5	14718	0	7.30134	19316	0	7.69285	7.4971	O		56	80	68	10112	0	6.69334	8020	0	6.36006	6.5267	O		106	63	84.5	11247	0	6.62189	14295	0	6.96704	6.79447	O		61	46	53.5	6467	0	6.28185	7995
tRNA-derived	N/A	chr11:68227589-68227681	chr11	68227589	68227681	II	40	66	53	8720	0	6.72003	9872	0	6.89846	6.80925	O		88	15	51.5	3385	0	5.38894	1939	0	4.59452	4.99173	O		39	67	53	6608	0	6.32149	5783	0	6.13003	6.22576	O		60	92	76	2506	0	4.58042	2407
AluY_SINE_74760232	N/A	chr11:75082304-75082584	chr11	75082304	75082584	II	45	76	60.5	43	3.53	-0.310021	49	2.57	-0.196065	-0.253043	NO		33	27	30	40	7.04	0.222392	33	4.66	0.0703893	0.146391	NO		25	62	43.5	48	2.86	0.0857299	40	4.32	-0.0703893	0.00767027	NO		46	43	44.5	35	2.95	-0.196801	37
chr11_9_tRNAPro_AGG+	TRP-AGG2-4	chr11:75946557-75946628	chr11	75946557	75946628	II	50	55	52.5	12243	0	7.21688	13629	0	7.37124	7.29406	O		62	55	58.5	8151	0	6.53046	7254	0	6.36291	6.44668	O		83	66	74.5	11088	0	6.73325	10269	0	6.62286	6.67805	O		61	85	73	7145	0	6.12226	7118
chr11_12_tRNAPro_TGG-	TRP-TGG2-1	chr11:75946869-75946940	chr11	75946869	75946940	II	61	54	57.5	9735	0	6.80219	11641	0	7.05943	6.93081	O		28	61	44.5	6795	0	6.51744	6375	0	6.42581	6.47163	O		53	44	48.5	9069	0	6.85687	9357	0	6.90183	6.87935	O		27	64	45.5	6040	0	6.32908	6532
chr11_10_tRNASer_AGA+	TRS-AGA6-1	chr11:109036039-109036120	chr11	109036039	109036120	II	53	20	36.5	104	0	1.01081	156	0	1.48388	1.24734	NO		49	15	32	33	0	0.0230836	56	0	0.472068	0.247576	NO		7	16	11.5	83	0	1.44514	59	0	1.10069	1.27292	NO		38	42	40	45	0	0.0995357	47
chr11_11_tRNALys_TTT+	TRK-TTT2-1	chr11:122430655-122430727	chr11	122430655	122430727	II	40	35	37.5	1469	0	4.47297	1656	0	4.64257	4.55777	O		39	18	28.5	432	0	2.98138	351	0	2.70328	2.84233	O		6	4	5	515	0	3.96083	459	0	3.80441	3.88262	O		33	23	28	347	0	2.70044	411
chr12_1_tRNALys_TTT+	TRK-TTT11-1	chr12:27843306-27843378	chr12	27843306	27843378	II	8	17	12.5	46	0	0.838537	50	0	0.912537	0.875537	NO		39	24	31.5	46	0	0.305413	51	0	0.397335	0.351374	NO		58	47	52.5	47	0	-0.0995357	71	0	0.291889	0.0961768	NO		56	28	42	45	0	0.0588937	54
AluY_SINE_Alu_39162319	N/A	chr12:39162319-39162611	chr12	39162319	39162611	II	6	8	7	17	0	0.345135	10	0	0.112475	0.228805	NO		14	9	11.5	16	0	0.148523	16	0	0.148523	0.148523	NO		12	17	14.5	11	0	-0.118181	20	0	0.168123	0.0249707	NO		1	9	5	13	0	0.296982	14
chr12_16_Pseudo_TTG-	NMTRQ-TTG6-1	chr12:50211190-50211264	chr12	50211190	50211264	II	14	0	7	12	0	0.182864	13	0	0.216811	0.199838	NO		46	7	26.5	13	0	-0.393914	11	0	-0.462627	-0.428271	NO		2	8	5	12	0	0.263034	16	0	0.394279	0.328657	NO		1	1	1	11	0	0.403356	15
chr12_2_tRNASer_CGA+	TRS-CGA4-1	chr12:56584148-56584229	chr12	56584148	56584229	II	115	66	90.5	8270	0	6.10601	8778	0	6.19171	6.14886	O		28	94	61	4822	0	5.73657	4066	0	5.49221	5.61439	O		99	83	91	7318	0	5.92427	5936	0	5.62369	5.77398	O		76	87	81.5	3439	0	4.9594	3293
chr12_3_tRNAGln_CTG+	TRQ-CTG12-1	chr12:74851182-74851254	chr12	74851182	74851254	II	10	14	12	67	0	1.2076	69	0	1.23704	1.22232	NO		4	23	13.5	21	0	0.229482	36	0	0.601451	0.415466	NO		28	17	22.5	37	0	0.351844	38	0	0.373217	0.36253	NO		2	13	7.5	19	0	0.385891	25
AluSp_SINE_Alu_87551831	N/A	chr12:87551831-87552137	chr12	87551831	87552137	II	37	46	41.5	1042	0	3.90622	1262	0	4.17552	4.04087	O		50	61	55.5	362	0	2.19686	338	0	2.10571	2.15128	O		35	54	44.5	664	0	3.21962	751	0	3.39001	3.30482	O		127	47	87	226	0	1.12964	278
chr12_4_tRNAAsp_GTC+	TRD-GTC2-8	chr12:96429799-96429870	chr12	96429799	96429870	II	47	46	46.5	10435	0	7.0959	12633	0	7.37094	7.23342	O		25	32	28.5	7331	0	6.97532	7187	0	6.94682	6.96107	O		24	52	38	9484	0	7.12837	10602	0	7.28866	7.20852	O		24	42	33	6844	0	6.76965	7798
chr12_15_Pseudo_TTG-	TRQ-TTG9-1	chr12:97490691-97490764	chr12	97490691	97490764	II	9	11	10	24	0	0.432959	21	0	0.350497	0.391728	NO		15	12	13.5	19	0	0.171766	9	0	-0.157541	0.00711254	NO		10	13	11.5	13	0	0.0512253	10	0	-0.0531113	-0.000943007	NO		3	19	11	19	0	0.257158	16
chr12_5_tRNAAsp_GTC+	TRD-GTC1-1	chr12:98897281-98897352	chr12	98897281	98897352	II	23	35	29	7062	0	6.90933	7325	0	6.96187	6.9356	O		32	29	30.5	3958	0	6.04259	3477	0	5.85716	5.94987	O		26	14	20	5993	0	6.91241	5789	0	6.8627	6.88755	O		30	51	40.5	3221	0	5.52712	3365
chr12_6_tRNATrp_CCA+	TRW-CCA4-1	chr12:98898030-98898101	chr12	98898030	98898101	II	27	29	28	8480	0	7.19696	9426	0	7.34903	7.273	O		59	52	55.5	5598	0	6.04055	4866	0	5.83954	5.94004	O		48	13	30.5	8100	0	7.07018	7642	0	6.98652	7.02835	O		66	25	45.5	4038	0	5.7517	4340
5S_rRNA-related_10	RN5S@	chr12:104519013-104519103	chr12	104519013	104519103	I	40	65	52.5	33	0	-0.389042	38	0	-0.278859	-0.333951	NO		39	64	51.5	50	0	-0.0268001	36	0	-0.304334	-0.165567	NO		58	31	44.5	40	0	-0.0898855	45	0	0.00965017	-0.0401177	NO		35	76	55.5	31	0	-0.487115	48
chr12_14_Pseudo_CTC-	TRE-CTC16-1	chr12:114386545-114386617	chr12	114386545	114386617	II	71	60	65.5	41	0	-0.427682	52	0	-0.219877	-0.323779	NO		84	78	81	56	0	-0.368151	53	0	-0.419376	-0.393764	NO		56	88	72	70	0	-0.0285692	47	0	-0.405639	-0.217104	NO		57	73	65	43	0	-0.380031	54
chr12_7_tRNAAsp_GTC+	TRD-GTC8-1	chr12:122860924-122860994	chr12	122860924	122860994	II	21	57	39	30	0	-0.201634	35	0	-0.0861566	-0.143895	NO		63	83	73	29	0	-0.803857	40	0	-0.557218	-0.680537	NO		38	35	36.5	37	0	0.0108068	19	0	-0.440573	-0.214883	NO		41	40	40.5	28	0	-0.28157	33
chr12_13_tRNAAla_TGC-	TRA-TGC3-2	chr12:125406301-125406372	chr12	125406301	125406372	II	16	3	9.5	9986	0	7.98624	11261	0	8.1591	8.07267	O		29	15	22	4819	0	6.54303	4243	0	6.36059	6.45181	O		36	13	24.5	7560	0	7.1217	7959	0	7.19561	7.15866	O		8	25	16.5	3511	0	6.25078	3802
chr12_12_tRNAAsp_GTC-	TRD-GTC2-9	chr12:125411891-125411962	chr12	125411891	125411962	II	31	19	25	9457	0	7.43038	11678	0	7.73385	7.58211	O		25	75	50	5301	0	6.05826	4794	0	5.91409	5.98617	O		32	33	32.5	8820	0	7.14568	9219	0	7.2093	7.17749	O		44	54	49	4404	0	5.81061	4710
chr12_11_tRNAPhe_GAA-	TRF-GAA1-4	chr12:125412389-125412461	chr12	125412389	125412461	II	54	35	44.5	10044	0	7.07918	10531	0	7.14729	7.11324	O		54	98	76	5960	0	5.82042	5056	0	5.5844	5.70241	O		61	59	60	8658	0	6.59296	7833	0	6.44901	6.52098	O		81	85	83	5029	0	5.48446	5176
chr12_10_tRNAAsp_GTC-	TRD-GTC2-10	chr12:125424193-125424264	chr12	125424193	125424264	II	60	64	62	18352	0	7.64244	21373	0	7.86196	7.7522	O		30	91	60.5	10167	0	6.81601	8241	0	6.514	6.66501	O		121	37	79	15611	0	7.16486	16195	0	7.21775	7.1913	O		100	60	80	7124	0	6.02317	7959
chr12_8_tRNAAla_TGC+	TRA-TGC4-1	chr12:125424512-125424583	chr12	125424512	125424583	II	74	86	80	15429	0	7.1348	17414	0	7.30908	7.22194	O		48	89	68.5	8183	0	6.38164	6815	0	6.11878	6.25021	O		66	56	61	12474	0	7.10231	12544	0	7.11036	7.10633	O		108	73	90.5	6263	0	5.70664	6535
chr12_9_Pseudo_AAT+	TRI-AAT11-1	chr12:129716198-129716272	chr12	129716198	129716272	II	9	22	15.5	25	0	0.273565	21	0	0.164631	0.219098	NO		20	60	40	29	0	-0.24664	23	0	-0.401363	-0.324001	NO		21	18	19.5	19	0	-0.0146468	20	0	0.0144996	-7.36031e-05	NO		10	6	8	30	0	0.658963	31
chr13_7_tRNAAsn_GTT-	TRN-GTT2-4	chr13:31248101-31248174	chr13	31248101	31248174	II	19	87	53	10074	0	6.9276	12138	0	7.19577	7.06168	O		20	24	22	5143	0	6.63635	3845	0	6.21954	6.42794	O		17	43	30	7397	0	6.95167	7668	0	7.00338	6.97753	O		57	36	46.5	3499	0	5.52766	3862
PDS5B_Intronic_AluSx	N/A	chr13:33230740-33231112	chr13	33230740	33231112	II	102	50	76	901	0	3.13472	1131	0	3.45323	3.29397	O		27	23	25	215	0	2.15528	213	0	2.14345	2.14937	O		63	48	55.5	421	0	2.39913	431	0	2.43077	2.41495	O		97	49	73	182	0	1.04142	150
chr13_6_Pseudo_TTG-	NMTRQ-TTG10-1	chr13:36639747-36639818	chr13	36639747	36639818	II	0	11	5.5	11	0	0.207805	7	0	0.0597062	0.133756	NO		19	29	24	6	0	-0.584963	7	0	-0.545434	-0.565198	NO		8	10	9	12	0	0.106915	8	0	-0.0374747	0.0347202	NO		2	20	11	13	0	0.0687128	11
chr13_5_tRNAGlu_TTC-	TRE-TTC1-2	chr13:41634874-41634945	chr13	41634874	41634945	II	31	60	45.5	6350	0	6.40094	7590	0	6.65717	6.52905	O		30	55	42.5	3276	0	5.51096	2624	0	5.19404	5.3525	O		39	85	62	5035	0	5.78278	4881	0	5.73824	5.76051	O		45	84	64.5	2550	0	4.77091	2646
chr13_4_tRNAGlu_CTC-	TRE-CTC3-1	chr13:42030061-42030132	chr13	42030061	42030132	II	27	64	45.5	473	0	2.73601	499	0	2.80872	2.77236	O		63	58	60.5	135	0	0.866476	104	0	0.566243	0.71636	NO		74	63	68.5	213	0	1.30276	181	0	1.09905	1.2009	NO		55	35	45	87	0	0.641546	93
chr13_3_tRNAGlu_TTC-	TRE-TTC2-1	chr13:45492062-45492133	chr13	45492062	45492133	II	53	59	56	16080	0	7.5494	18794	0	7.77402	7.66171	O		37	144	90.5	11052	0	6.52304	9349	0	6.28233	6.40269	O		54	82	68	13584	0	7.11809	15083	0	7.26879	7.19344	O		103	66	84.5	8365	0	6.19611	9941
chr13_2_Pseudo_CTC-	TRE-CTC4-1	chr13:58458550-58458621	chr13	58458550	58458621	II	4	0	2	11	1.03	0.357552	9	1.36	0.285402	0.321477	NO		5	1	3	8	1.53	0.203533	12	0.95	0.347923	0.275728	NO		18	8	13	12	0	-0.0339473	13	0	0	-0.0169737	NO		3	0	1.5	9	0	0.308122	7
chr13_1_tRNAPhe_GAA-	TRF-GAA1-5	chr13:95201904-95201976	chr13	95201904	95201976	II	51	37	44	9904	0	7.06871	10440	0	7.14452	7.10661	O		38	44	41	5624	0	6.31531	5437	0	6.26679	6.29105	O		76	59	67.5	7802	0	6.32783	8320	0	6.42023	6.37403	O		42	106	74	4654	0	5.49309	5160
RNaseP_RNA	RPPH1	chr14:20811230-20811570	chr14	20811230	20811570	III	29	71	50	3736	0	5.55689	3791	0	5.57781	5.56735	O		86	69	77.5	2002	0	4.24049	1645	0	3.96175	4.10112	O		59	62	60.5	3546	0	5.30429	2801	0	4.96725	5.13577	O		84	132	108	1446	0	3.41895	1461
chr14_23_tRNAPro_AGG-	TRP-AGG2-5	chr14:21077495-21077566	chr14	21077495	21077566	II	22	19	20.5	6385	0	6.98902	7136	0	7.14874	7.06888	O		27	18	22.5	2315	0	5.48113	2186	0	5.3995	5.44031	O		29	13	21	4837	0	6.57639	4208	0	6.37674	6.47657	O		23	50	36.5	2183	0	5.05651	2200
chr14_1_tRNALeu_AAG+	TRL-AAG2-3	chr14:21078291-21078372	chr14	21078291	21078372	II	42	60	51	12919	0	7.3207	15734	0	7.6045	7.4626	O		41	27	34	6284	0	6.62434	5633	0	6.46735	6.54584	O		37	36	36.5	10675	0	7.33071	10630	0	7.32464	7.32768	O		51	69	60	4395	0	5.61961	4884
chr14_22_tRNAPro_AGG-	TRP-AGG2-6	chr14:21081560-21081631	chr14	21081560	21081631	II	25	24	24.5	11350	0	7.70603	13705	0	7.97738	7.84171	O		99	94	96.5	5066	0	5.33216	4372	0	5.12095	5.22655	O		55	43	49	9702	0	6.94474	10392	0	7.04356	6.99415	O		63	73	68	4249	0	5.44835	4380
chr14_21_tRNAThr_TGT-	TRT-TGT3-1	chr14:21081949-21082021	chr14	21081949	21082021	II	54	40	47	9237	0	6.9111	11081	0	7.17291	7.04201	O		88	57	72.5	4265	0	5.38896	3523	0	5.11534	5.25215	O		49	40	44.5	7162	0	6.59301	8133	0	6.77572	6.68436	O		77	66	71.5	3120	0	4.9558	3384
chr14_2_tRNALeu_TAG+	TRL-TAG2-1	chr14:21093529-21093610	chr14	21093529	21093610	II	48	46	47	10314	0	7.06972	12646	0	7.36303	7.21637	O		16	29	22.5	3803	0	6.19001	3419	0	6.03772	6.11386	O		66	66	66	8461	0	6.46676	8565	0	6.48432	6.47554	O		82	23	52.5	2649	0	5.02116	3147
tRNA-Tyr-TAC_tRNA_tRNA	N/A	chr14:21098590-21098668	chr14	21098590	21098668	II	26	40	33	708	0	3.5502	721	0	3.57539	3.56279	O		15	26	20.5	123	0	1.59918	108	0	1.45031	1.52474	NO		21	32	26.5	454	0	3.09868	387	0	2.88372	2.9912	O		59	20	39.5	79	0	0.649243	67
chr14_20_tRNAThr_TGT-	TRT-TGT4-1	chr14:21099319-21099391	chr14	21099319	21099391	II	32	3	17.5	3021	0	6.00521	2692	0	5.8406	5.9229	O		7	44	25.5	820	0	3.9369	881	0	4.03689	3.9869	O		2	12	7	2260	0	5.95168	1811	0	5.63682	5.79425	O		3	27	15	860	0	4.30581	820
chr14_3_tRNAPro_TGG+	TRP-TGG1-1	chr14:21101165-21101236	chr14	21101165	21101236	II	10	23	16.5	2854	0	5.9547	3245	0	6.13812	6.04641	O		13	29	21	851	0	4.11057	876	0	4.15094	4.13076	O		26	8	17	2095	0	5.49866	1990	0	5.42555	5.4621	O		42	20	31	678	0	3.53687	724
chr14_19_tRNATyr_GTA_I-	TRY-GTA5-3	chr14:21121258-21121351	chr14	21121258	21121351	II	87	67	77	2446	0	4.53233	2632	0	4.63683	4.58458	O		74	53	63.5	541	0	2.61045	452	0	2.36599	2.48822	O		77	59	68	1203	0	3.65325	1063	0	3.47937	3.56631	O		51	90	70.5	293	0	1.68434	337
chr14_18_tRNATyr_GTA_I-	TRY-GTA4-1	chr14:21125623-21125716	chr14	21125623	21125716	II	41	38	39.5	1143	0	4.07705	1479	0	4.44044	4.25874	O		72	72	72	245	0	1.43086	193	0	1.12847	1.27967	NO		78	77	77.5	680	0	2.72348	615	0	2.58496	2.65422	O		81	85	83	149	0	0.663637	200
chr14_17_tRNATyr_GTA_I-	TRY-GTA7-1	chr14:21128117-21128210	chr14	21128117	21128210	II	83	56	69.5	251	0	1.4978	252	0	1.50293	1.50036	NO		41	84	62.5	62	0	-0.0078195	77	0	0.210086	0.101133	NO		26	36	31	138	0	1.46158	115	0	1.24917	1.35538	NO		114	77	95.5	59	0	-0.49581	74
chr14_16_tRNATyr_GTA_I-	TRY-GTA5-4	chr14:21131351-21131444	chr14	21131351	21131444	II	70	48	59	1608	0	4.20199	1659	0	4.24622	4.2241	O		87	60	73.5	317	0	1.7453	251	0	1.44094	1.59312	NO		79	58	68.5	930	0	3.28484	925	0	3.27731	3.28107	O		49	81	65	200	0	1.27563	208
chr14_15_Pseudo_TAG-	TRL-TAG4-1	chr14:21145178-21145259	chr14	21145178	21145259	II	27	18	22.5	39	0	0.394279	41	0	0.435502	0.41489	NO		32	20	26	39	0	0.30117	37	0	0.258734	0.279952	NO		30	43	36.5	34	0	-0.0552824	33	0	-0.0780025	-0.0666425	NO		31	10	20.5	34	0	0.341789	36
chr14_4_tRNAThr_TGT+	TRT-TGT5-1	chr14:21149849-21149921	chr14	21149849	21149921	II	49	51	50	5648	0	6.14924	5964	0	6.22738	6.18831	O		18	69	43.5	2268	0	4.96649	2012	0	4.79609	4.88129	O		18	24	21	4534	0	6.48366	3830	0	6.24196	6.36281	O		30	30	30	1641	0	4.79961	1625
chr14_5_tRNATyr_GTA_I+	TRY-GTA5-5	chr14:21151432-21151520	chr14	21151432	21151520	II	76	55	65.5	12806	0	7.07048	14237	0	7.22297	7.14672	O		46	50	48	4697	0	5.92131	4141	0	5.74078	5.83104	O		72	75	73.5	10314	0	6.64302	10698	0	6.69561	6.66931	O		78	27	52.5	3730	0	5.51019	3895
chr14_6_tRNAPro_TGG+	TRP-TGG3-2	chr14:21152175-21152246	chr14	21152175	21152246	II	67	77	72	7233	0	6.15392	8663	0	6.41321	6.28357	O		49	49	49	4060	0	5.6941	3666	0	5.54797	5.62104	O		79	41	60	6472	0	6.17481	6383	0	6.15493	6.16487	O		26	98	62	3543	0	5.27936	3807
chr14_7_tRNAArg_ACG+	TRR-ACG1-3	chr14:23398910-23398982	chr14	23398910	23398982	II	48	46	47	9372	0	6.93197	10426	0	7.08526	7.00861	O		30	23	26.5	6266	0	6.80004	5754	0	6.67767	6.73886	O		36	102	69	7871	0	6.31846	8823	0	6.48259	6.40053	O		38	55	46.5	5229	0	6.10318	5608
chr14_14_tRNAGlu_TTC-	TRE-TTC11-1	chr14:32236816-32236886	chr14	32236816	32236886	II	49	66	57.5	39	0	-0.342687	29	0	-0.568568	-0.455627	NO		19	50	34.5	33	0	-0.0339473	48	0	0.274175	0.120114	NO		24	36	30	29	0	-0.0242475	47	0	0.359896	0.167824	NO		13	100	56.5	26	0	-0.627273	40
U6-7	RNU6-7	chr14:32671250-32671356	chr14	32671250	32671356	III	120	33	76.5	1028	22.61	3.31241	1262	22.71	3.60068	3.45655	O		90	80	85	912	17.4	3.03409	861	21.48	2.95379	2.99394	O		52	48	50	1130	21.61	3.85798	1270	19.97	4.02237	3.94017	O		140	71	105.5	700	20.14	2.4296	792
U6-8	RNU6-8	chr14:32672369-32672475	chr14	32672369	32672475	III	58	42	50	6895	3.41	6.43567	8704	3.48	6.7705	6.60308	O		24	84	54	4986	3.19	5.9	4298	4.33	5.68717	5.79359	O		77	64	70.5	6208	3.99	5.95582	7451	3.53	6.21796	6.08689	O		48	60	54	3589	3.93	5.42906	4188
RN7SL1	RN7SL1	chr14:50053297-50053596	chr14	50053297	50053596	mixed	93	96	94.5	19506	31.42	7.29385	24661	35.21	7.6317	7.46277	O		84	129	106.5	10181	33.69	6.22508	8133	31.88	5.90213	6.0636	O		88	76	82	19049	35.65	7.41234	18806	34.81	7.39385	7.4031	O		142	108	125	6172	32.24	5.32239	7016
RN7SL3	RN7SL3	chr14:50320327-50320727	chr14	50320327	50320727	mixed	85	85	85	772	90.12	2.80197	1126	91.38	3.32944	3.0657	O		100	114	107	506	83.52	1.96806	390	81.07	1.61621	1.79214	O		110	84	97	914	91.4	2.89396	930	89.81	2.91821	2.90608	O		167	91	129	282	80.62	0.972519	333
RN7SL2	RN7SL2	chr14:50329268-50329567	chr14	50329268	50329567	mixed	159	109	134	21614	29.72	7.04413	26460	33.49	7.33561	7.18987	O		139	70	104.5	9929	35.4	6.21032	7577	34.36	5.82165	6.01599	O		123	157	140	19980	35.13	6.87904	20511	32.74	6.91683	6.89794	O		213	120	166.5	6443	33.4	5.04183	7315
chr14_13_tRNALys_CTT-	TRK-CTT1-1	chr14:58706613-58706685	chr14	58706613	58706685	II	1	12	6.5	6486	0	7.47995	6629	0	7.51127	7.49561	O		12	6	9	4462	0	6.84774	4121	0	6.73384	6.79079	O		2	25	13.5	6440	0	7.21661	5340	0	6.94776	7.08218	O		12	30	21	4525	0	6.48081	4450
chr14_8_tRNACys_GCA+	TRC-GCA8-1	chr14:73429679-73429750	chr14	73429679	73429750	II	60	27	43.5	3234	0	5.47275	3928	0	5.75088	5.61182	O		5	37	21	1052	0	4.40706	979	0	4.30629	4.35667	O		27	14	20.5	2098	0	5.39707	2043	0	5.35929	5.37818	O		71	35	53	976	0	3.59938	1031
chr14_12_Pseudo_TTT-	TRK-TTT14-1	chr14:74055529-74055601	chr14	74055529	74055601	II	21	44	32.5	95	0	1	99	0	1.04544	1.02272	NO		29	1	15	64	0	1.06274	54	0	0.900464	0.9816	NO		35	33	34	87	0	0.870365	69	0	0.629357	0.749861	NO		61	5	33	69	0	0.652077	46
chr14_11_Pseudo_CTA-	TR*-CTA3-1	chr14:78700838-78700910	chr14	78700838	78700910	II	17	25	21	40	0	0.456858	45	0	0.556393	0.506626	NO		37	15	26	51	0	0.532495	36	0	0.237039	0.384767	NO		43	35	39	43	0	0.0813001	33	0	-0.131245	-0.0249722	NO		22	20	21	46	0	0.575502	42
chr14_9_tRNAAla_AGC+	TRA-AGC15-1	chr14:89445442-89445514	chr14	89445442	89445514	II	15	12	13.5	366	0	3.18641	461	0	3.49664	3.34152	O		44	30	37	90	0	0.840801	76	0	0.661831	0.751316	NO		30	13	21.5	136	0	1.68854	129	0	1.62638	1.65746	O		20	30	25	85	0	1.06413	69
chr14_10_tRNAIle_AAT+	TRI-AAT5-4	chr14:102783429-102783502	chr14	102783429	102783502	II	31	71	51	5322	0	6.04601	5267	0	6.03111	6.03856	O		77	61	69	3344	0	5.09089	2753	0	4.81307	4.95198	O		58	55	56.5	4797	0	5.80228	3657	0	5.4136	5.60794	O		64	76	70	2933	0	4.88899	2727
chr15_11_tRNAGlu_TTC-	TRE-TTC2-2	chr15:26327381-26327452	chr15	26327381	26327452	II	16	12	14	2179	0	5.64975	2009	0	5.53421	5.59198	O		26	27	26.5	953	0	4.12087	765	0	3.81463	3.96775	O		58	20	39	1354	0	4.3261	1325	0	4.29555	4.31083	O		12	49	30.5	877	0	3.9061	922
chr15_10_tRNASer_GCT-	TRS-GCT4-2	chr15:40886023-40886104	chr15	40886023	40886104	II	43	27	35	12457	0	7.58577	16201	0	7.9641	7.77493	O		23	12	17.5	10762	0	7.82782	9323	0	7.62136	7.72459	O		72	25	48.5	10702	0	7.09501	14042	0	7.48592	7.29046	O		48	23	35.5	7113	0	6.76889	9086
chr15_9_tRNAHis_GTG-	TRH-GTG1-7	chr15:45490804-45490875	chr15	45490804	45490875	II	35	33	34	12579	0	7.62217	15099	0	7.88503	7.7536	O		70	38	54	7871	0	6.5555	6591	0	6.30052	6.42801	O		75	59	67	10443	0	6.75447	11946	0	6.94795	6.85121	O		39	40	39.5	5511	0	6.31699	6609
chr15_8_tRNAHis_GTG-	TRH-GTG1-8	chr15:45492611-45492682	chr15	45492611	45492682	II	84	62	73	18823	0	7.51601	23524	0	7.83718	7.67659	O		98	109	103.5	12302	0	6.52942	10569	0	6.31094	6.42018	O		81	73	77	15215	0	7.15458	19032	0	7.47694	7.31576	O		202	55	128.5	7354	0	5.54185	9230
chr15_1_tRNAHis_GTG+	TRH-GTG1-9	chr15:45493349-45493420	chr15	45493349	45493420	II	39	8	23.5	13467	0	7.97888	16822	0	8.29917	8.13902	O		77	44	60.5	5396	0	5.90583	4466	0	5.63458	5.7702	O		108	74	91	10005	0	6.37389	11186	0	6.53441	6.45415	O		54	55	54.5	3034	0	5.18032	3434
chr15_7_tRNAGln_CTG-	TRQ-CTG1-4	chr15:66161400-66161471	chr15	66161400	66161471	II	49	55	52	8567	0	6.71207	8296	0	6.66586	6.68896	O		87	38	62.5	5706	0	5.95445	4904	0	5.73716	5.8458	O		84	77	80.5	8203	0	6.2193	6908	0	5.9724	6.09585	O		71	77	74	5154	0	5.63941	5160
U6-1	RNU6-1	chr15:68132276-68132383	chr15	68132276	68132383	III	12	20	16	5495	3.58	6.9082	5939	4.01	7.01971	6.96395	O		56	7	31.5	3517	3.89	5.84987	3305	4.24	5.76096	5.80541	O		13	50	31.5	4906	3.88	6.32661	4731	4.25	6.27453	6.30057	O		13	37	25	3014	4	5.79039	3284
chr15_6_Pseudo_CTT-	TRK-CTT16-1	chr15:76674765-76674838	chr15	76674765	76674838	II	10	20	15	11	0	-0.134301	19	0	0.122857	-0.00572217	NO		1	1	1	9	0	0.331206	9	0	0.331206	0.331206	NO		10	4	7	15	0	0.2824	14	0	0.249978	0.266189	NO		0	6	3	11	0	0.313158	15
chr15_2_tRNALys_CTT+	TRK-CTT1-2	chr15:79152904-79152976	chr15	79152904	79152976	II	21	14	17.5	6496	0	7.10213	7147	0	7.23931	7.17072	O		12	38	25	4238	0	6.27798	4029	0	6.20555	6.24177	O		6	14	10	5597	0	7.13622	5723	0	7.16817	7.1522	O		38	0	19	3598	0	6.21025	3925
chr15_3_tRNACys_GCA+	TRC-GCA5-1	chr15:80036997-80037069	chr15	80036997	80037069	II	16	29	22.5	1059	0.21	4.37454	1220	0.14	4.57347	4.474	O		26	18	22	453	0.07	3.21544	455	0.24	3.2214	3.21842	O		19	27	23	622	0.14	3.62081	558	0	3.47175	3.54628	O		6	23	14.5	402	0.21	3.27915	408
chr15_4_tRNAArg_TCG+	TRR-TCG1-1	chr15:89878304-89878376	chr15	89878304	89878376	II	86	56	71	11941	0	6.88904	14048	0	7.12294	7.00599	O		59	86	72.5	8498	0	6.37851	7075	0	6.11514	6.24683	O		56	66	61	9360	0	6.68911	11572	0	6.99429	6.8417	O		54	65	59.5	5903	0	6.05073	6477
chr15_5_Pseudo_GTA-	TRY-GTA12-1	chr15:92254302-92254374	chr15	92254302	92254374	II	18	27	22.5	17	0	-0.159657	19	0	-0.0995357	-0.129596	NO		33	23	28	32	0	0.0962153	31	0	0.0727563	0.0844858	NO		10	24	17	17	0	0	34	0	0.445411	0.222706	NO		12	54	33	24	0	-0.222392	23
chr16_34_tRNAGly_CCC-	TRG-CCC2-2	chr16:686736-686806	chr16	686736	686806	II	31	57	44	10146	0	7.10343	10049	0	7.08961	7.09652	O		16	131	73.5	5747	0	5.80262	3925	0	5.25598	5.5293	O		42	55	48.5	8845	0	6.82091	6472	0	6.37205	6.59648	O		30	140	85	5903	0	5.68906	5166
chr16_1_tRNAArg_CCG+	TRR-CCG1-3	chr16:3200675-3200747	chr16	3200675	3200747	II	75	96	85.5	14888	0	7.01302	16300	0	7.14349	7.07825	O		65	155	110	8360	0	5.90517	6896	0	5.62852	5.76685	O		79	66	72.5	12606	0	6.94577	12730	0	6.95986	6.95282	O		141	91	116	6751	0	5.53746	7193
chr16_33_Pseudo_AGG-	TRP-AGG6-1	chr16:3202609-3202680	chr16	3202609	3202680	II	82	102	92	6429	0	5.72636	7831	0	6.00976	5.86806	O		111	124	117.5	3458	0	4.56361	2633	0	4.17427	4.36894	O		89	129	109	5258	0	5.24957	5192	0	5.23145	5.24051	O		154	80	117	2378	0	4.03395	2479
chr16_2_tRNAArg_CCT+	TRR-CCT3-1	chr16:3202901-3202973	chr16	3202901	3202973	II	10	62	36	7468	0	6.8279	8867	0	7.07471	6.9513	O		85	52	68.5	4045	0	5.37053	3138	0	5.0073	5.18892	O		39	71	55	6135	0	6.18049	5681	0	6.07014	6.12532	O		106	49	77.5	2838	0	4.73764	2817
chr16_32_tRNALys_CTT-	TRK-CTT3-1	chr16:3207406-3207478	chr16	3207406	3207478	II	65	76	70.5	6996	0	6.12744	7677	0	6.2609	6.19417	O		86	24	55	2434	0	4.8574	2288	0	4.76927	4.81333	O		65	54	59.5	5745	0	6.01179	5826	0	6.03188	6.02184	O		120	30	75	2178	0	4.39428	2112
chr16_3_tRNAPro_TGG+	TRP-TGG3-3	chr16:3208923-3208994	chr16	3208923	3208994	II	25	57	41	3152	0	5.48597	2952	0	5.39232	5.43914	O		25	80	52.5	1203	0	3.90163	945	0	3.56294	3.73229	O		29	37	33	2701	0	5.43793	1957	0	4.9791	5.20851	O		45	84	64.5	924	0	3.3356	834
chr16_4_tRNAPro_AGG_I+	TRP-AGG3-1	chr16:3210386-3210480	chr16	3210386	3210480	II	130	107	118.5	72	0	-0.541894	71	0	-0.556108	-0.549001	NO		117	89	103	76	0	-0.327362	55	0	-0.645891	-0.486627	NO		62	109	85.5	67	0	-0.251836	37	0	-0.78566	-0.518748	NO		122	83	102.5	62	0	-0.526287	52
chr16_5_tRNALys_CTT+	TRK-CTT8-1	chr16:3214939-3215011	chr16	3214939	3215011	II	45	71	58	65	0	0.110424	59	0	0.0163018	0.0633629	NO		43	63	53	59	0	0.100694	50	0	-0.0531113	0.0237913	NO		63	62	62.5	61	0	-0.0235868	66	0	0.053581	0.0149971	NO		78	76	77	33	0	-0.764187	41
chr16_31_Pseudo_TGG-	TRP-TGG4-1	chr16:3220961-3221031	chr16	3220961	3221031	II	88	38	63	68	0	0.075551	69	0	0.0901978	0.0828744	NO		75	172	123.5	54	0	-0.869777	45	0	-1.03328	-0.951527	NO		123	138	130.5	41	0	-1.17668	48	0	-1.04103	-1.10885	NO		88	129	108.5	29	0	-1.2311	37
chr16_6_tRNAPro_CGG+	TRP-CGG1-2	chr16:3222049-3222120	chr16	3222049	3222120	II	112	92	102	2921	0	4.48259	3137	0	4.58451	4.53355	O		88	87	87.5	540	0	2.2783	410	0	1.90484	2.09157	O		46	120	83	1565	0	3.81916	1363	0	3.6238	3.72148	O		41	125	83	290	0	1.50175	320
chr16_7_tRNALys_CTT+	TRK-CTT2-5	chr16:3225692-3225764	chr16	3225692	3225764	II	106	50	78	6613	0	5.94273	7881	0	6.19476	6.06874	O		61	52	56.5	1349	0	3.99478	1131	0	3.74652	3.87065	O		98	47	72.5	2985	0	4.87846	2853	0	4.81388	4.84617	O		60	90	75	720	0	2.8365	741
chr16_30_tRNALys_CTT-	TRK-CTT5-1	chr16:3230555-3230627	chr16	3230555	3230627	II	68	72	70	3052	0	4.94579	3536	0	5.15623	5.05101	O		58	46	52	475	0	2.62259	475	0	2.62259	2.62259	O		65	77	71	1176	0	3.5778	1122	0	3.51171	3.54476	O		39	42	40.5	318	0	2.30339	331
chr16_29_tRNAPro_AGG-	TRP-AGG2-7	chr16:3232635-3232706	chr16	3232635	3232706	II	93	102	97.5	9789	0	6.26701	9901	0	6.28337	6.27519	O		63	106	84.5	2834	0	4.64461	2435	0	4.42817	4.53639	O		37	104	70.5	5879	0	5.87765	5460	0	5.77154	5.82459	O		64	106	85	1719	0	3.92682	1896
chr16_28_tRNAPro_TGG-	TRP-TGG3-4	chr16:3234133-3234204	chr16	3234133	3234204	II	38	75	56.5	4734	9.08	5.78333	5110	7.83	5.89292	5.83813	O		59	92	75.5	1257	4.93	3.6087	1011	7.07	3.30266	3.45568	O		68	105	86.5	2630	7.88	4.51302	2434	5.58	4.4026	4.45781	O		70	101	85.5	666	8.6	2.59119	574
chr16_8_tRNAPro_TGG+	TRP-TGG3-5	chr16:3238094-3238165	chr16	3238094	3238165	II	64	86	75	2224	19.32	4.42403	2413	16.54	4.54019	4.48211	O		99	101	100	590	10.52	2.25376	544	13.14	2.14254	2.19815	O		47	94	70.5	1505	13.77	3.93297	1359	9.99	3.78878	3.86088	O		110	90	100	416	13.77	1.77853	446
chr16_9_tRNAPro_AGG+	TRP-AGG2-8	chr16:3239634-3239705	chr16	3239634	3239705	II	48	77	62.5	10525	0	6.83426	10500	0	6.83084	6.83255	O		67	61	64	3504	0	5.2325	3090	0	5.05274	5.14262	O		28	74	51	7471	0	6.53302	6099	0	6.24159	6.3873	O		61	91	76	2643	0	4.65632	2525
chr16_10_tRNALys_CTT+	TRK-CTT4-1	chr16:3241501-3241573	chr16	3241501	3241573	II	69	87	78	6959	0	6.01598	7514	0	6.12623	6.0711	O		47	106	76.5	1096	0	3.40228	920	0	3.15707	3.27968	O		69	125	97	2473	0	4.30076	2449	0	4.28686	4.29381	O		97	137	117	644	0	2.19693	716
chr16_11_tRNAPro_AGG+	TRP-AGG1-1	chr16:3241989-3242060	chr16	3241989	3242060	II	76	101	88.5	4010	0	5.0914	4504	0	5.25783	5.17461	O		31	104	67.5	691	0	2.88653	587	0	2.6618	2.77416	O		62	111	86.5	1832	0	3.99845	1549	0	3.76061	3.87953	O		112	114	113	507	0	1.90891	461
chr16_12_tRNAArg_CCT+	TRR-CCT5-1	chr16:3243918-3243990	chr16	3243918	3243990	II	25	39	32	443	0	2.9315	469	0	3.0087	2.9701	O		65	53	59	82	0	0.331621	80	0	0.305626	0.318624	NO		53	47	50	257	0	1.84298	291	0	2.0045	1.92374	O		37	46	41.5	79	0	0.608313	71
chr16_13_Pseudo_CTT+	TRK-CTT14-1	chr16:3246153-3246225	chr16	3246153	3246225	II	107	128	117.5	1273	0	3.14305	1458	0	3.33459	3.23882	O		60	74	67	251	0	1.53451	238	0	1.46618	1.50034	NO		85	41	63	623	0	2.81178	615	0	2.794	2.80289	O		56	77	66.5	234	0	1.45194	202
chr16_14_tRNAGln_TTG+	NMTRQ-TTG5-1	chr16:3419813-3419884	chr16	3419813	3419884	II	8	2	5	18	0	0.455679	20	0	0.514573	0.485126	NO		14	10	12	25	0	0.389042	18	0	0.192645	0.290844	NO		2	23	12.5	16	0	0.114171	10	0	-0.0874628	0.0133541	NO		1	27	14	19	0	0.155278	20
MIRb_SINE_MIR_9136662	N/A	chr16:9136662-9137062	chr16	9136662	9137062	II	168	111	139.5	1434	0	3.11056	1693	0	3.34557	3.22806	O		96	75	85.5	313	0	1.57032	371	0	1.79571	1.68301	O		78	134	106	571	0	2.14376	560	0	2.11711	2.13043	O		54	96	75	248	0	1.4047	304
chr16_15_tRNAThr_CGT+	TRT-CGT2-1	chr16:14379750-14379821	chr16	14379750	14379821	II	27	80	53.5	14406	0	7.43368	17729	0	7.73256	7.58312	O		72	47	59.5	9271	0	6.69935	6854	0	6.26522	6.48228	O		50	48	49	13134	0	7.38053	13022	0	7.3682	7.37437	O		53	68	60.5	6505	0	6.17413	6598
chr16_27_tRNALeu_TAG-	TRL-TAG3-1	chr16:22207032-22207113	chr16	22207032	22207113	II	53	59	56	14185	0	7.36886	16803	0	7.61274	7.4908	O		9	29	19	10758	0	7.78243	9301	0	7.57311	7.67777	O		67	43	55	13055	0	7.26624	14183	0	7.38553	7.32588	O		75	58	66.5	8025	0	6.38321	9467
chr16_16_tRNALeu_AAG+	TRL-AAG2-4	chr16:22308461-22308542	chr16	22308461	22308542	II	22	40	31	12972	0	7.73571	14964	0	7.94136	7.83853	O		24	37	30.5	10210	0	7.40306	7425	0	6.94513	7.1741	O		28	40	34	11379	0	7.47788	11148	0	7.44837	7.46313	O		2	43	22.5	7716	0	7.20499	7994
POLR3E_Intronic_MIR_repeat	N/A	chr16:22309683-22310083	chr16	22309683	22310083	II	87	56	71.5	7303	0	6.17485	8716	0	6.42907	6.30196	O		29	81	55	4441	0	5.71699	4174	0	5.62816	5.67257	O		74	63	68.5	7935	0	6.33741	7861	0	6.32394	6.33067	O		47	111	79	3825	0	5.14433	4160
RUNDC2C_Intronic_AluSg	N/A	chr16:29351318-29351759	chr16	29351318	29351759	II	83	41	62	2429	22.3	4.74029	3367	26.69	5.20648	4.97339	O		46	20	33	1285	26.4	4.38357	1150	21.28	4.22729	4.30543	O		81	67	74	3141	25.94	4.93028	3372	25.78	5.03173	4.98101	O		16	36	26	1018	22.16	4.22607	1047
chr16_17_tRNALeu_CAG+	TRL-CAG2-1	chr16:57333863-57333945	chr16	57333863	57333945	II	46	55	50.5	14751	0	7.52054	18083	0	7.81382	7.66718	O		30	33	31.5	7807	0	6.99357	6744	0	6.78328	6.88842	O		37	92	64.5	13293	0	7.13939	14719	0	7.28609	7.21274	O		73	84	78.5	6227	0	5.8497	6387
chr16_26_tRNALeu_CAG-	TRL-CAG2-2	chr16:57334392-57334474	chr16	57334392	57334474	II	32	40	36	16658	0	7.98213	17998	0	8.09356	8.03784	O		61	50	55.5	12349	0	7.17775	10625	0	6.96139	7.06957	O		79	64	71.5	13141	0	7.01974	16187	0	7.31988	7.16981	O		90	100	95	8759	0	6.1357	10133
chr16_25_tRNAGly_GCC-	TRG-GCC3-1	chr16:70812114-70812184	chr16	70812114	70812184	II	30	71	50.5	1763	0	4.47724	2048	0	4.69006	4.58365	O		38	10	24	1007	0	4.26331	910	0	4.12163	4.19247	O		76	50	63	1619	0	4.14822	1495	0	4.03543	4.09183	O		34	47	40.5	607	0	3.1756	635
chr16_24_tRNAGly_GCC-	TRG-GCC2-4	chr16:70812942-70813012	chr16	70812942	70813012	II	52	44	48	8605	0	6.79058	9295	0	6.90149	6.84603	O		30	61	45.5	6187	0	6.3636	5575	0	6.21409	6.28885	O		53	60	56.5	8063	0	6.54783	7874	0	6.51374	6.53078	O		49	30	39.5	4556	0	6.04408	4901
chr16_18_tRNAGly_GCC+	TRG-GCC5-1	chr16:70822597-70822667	chr16	70822597	70822667	II	37	69	53	182	0	1.35288	207	0	1.5137	1.43329	NO		58	44	51	89	0	0.554968	108	0	0.768674	0.661821	NO		64	88	76	158	0	0.826668	151	0	0.771925	0.799297	NO		126	55	90.5	80	0	-0.13153	89
chr16_19_tRNAGly_GCC+	TRG-GCC2-5	chr16:70823410-70823480	chr16	70823410	70823480	II	64	9	36.5	802	0	3.64516	893	0	3.7949	3.72003	O		83	38	60.5	377	0	2.16904	338	0	2.02372	2.09638	O		49	47	48	596	0	3.00462	582	0	2.97199	2.9883	O		69	66	67.5	212	0	1.31153	226
chr16_20_tRNAMet_CAT+	TRM-CAT2-1	chr16:71460396-71460468	chr16	71460396	71460468	II	83	51	67	1446	0	3.92756	1664	0	4.12631	4.02693	O		58	49	53.5	389	0	2.3271	332	0	2.11614	2.22162	O		109	74	91.5	708	0	2.60266	696	0	2.57901	2.59084	O		92	87	89.5	380	0	1.77861	408
chr16_21_tRNAGln_CTG+	TRQ-CTG18-1	chr16:71724890-71724963	chr16	71724890	71724963	II	25	28	26.5	22	0	-0.119739	25	0	-0.0388192	-0.0792792	NO		12	30	21	22	0	0.0280144	37	0	0.393664	0.210839	NO		31	25	28	25	0	-0.0766213	20	0	-0.214125	-0.145373	NO		19	31	25	23	0	-0.0534393	30
chr16_23_tRNALys_TTT-	TRK-TTT1-1	chr16:73512216-73512288	chr16	73512216	73512288	II	20	19	19.5	456	0	3.29546	451	0	3.28054	3.288	O		33	40	36.5	238	0	2.01081	199	0	1.78392	1.89736	O		55	21	38	319	0	2.35962	296	0	2.26127	2.31044	O		17	23	20	267	0	2.57046	262
chr16_22_tRNAMet_CAT-	TRM-CAT6-1	chr16:87417628-87417700	chr16	87417628	87417700	II	8	12	10	7062	0	7.47005	6337	0	7.31447	7.39226	O		20	27	23.5	3134	0	5.88607	2085	0	5.30497	5.59552	O		8	52	30	6117	0	6.67878	3789	0	5.99209	6.33543	O		41	42	41.5	2929	0	5.37102	2545
chr17_1_Pseudo_???+	TRU-NNN6-1	chr17:7524457-7524525	chr17	7524457	7524525	II	88	71	79.5	45	0	-0.545968	41	0	-0.62504	-0.585504	NO		33	46	39.5	33	0	-0.141661	32	0	-0.164745	-0.153203	NO		55	43	49	30	0	-0.39689	32	0	-0.349584	-0.373237	NO		38	57	47.5	32	0	-0.321928	38
chr17_2_tRNALys_TTT+	TRK-TTT3-5	chr17:8022473-8022545	chr17	8022473	8022545	II	29	87	58	5311	0	5.92346	5753	0	6.03817	5.98082	O		14	37	25.5	3248	0	5.88418	3314	0	5.91294	5.89856	O		25	25	25	5108	0	6.54563	4768	0	6.44686	6.49624	O		10	34	22	3113	0	5.91749	3129
chr17_3_tRNAGln_CTG+	TRQ-CTG1-5	chr17:8023070-8023141	chr17	8023070	8023141	II	12	22	17	3851	0	6.36762	3799	0	6.34816	6.35789	O		3	0	1.5	1685	0	5.76671	1628	0	5.71795	5.74233	O		8	24	16	3406	0	6.22295	3011	0	6.04677	6.13486	O		0	4	2	1747	0	5.79523	1713
chr17_42_tRNALeu_TAG-	TRL-TAG1-1	chr17:8023632-8023713	chr17	8023632	8023713	II	47	64	55.5	8468	0	6.63506	9301	0	6.76996	6.70251	O		25	41	33	3268	0	5.7101	2765	0	5.47135	5.59072	O		55	17	36	7064	0	6.74799	7231	0	6.78156	6.76477	O		49	53	51	2599	0	5.02045	2858
chr17_4_tRNAArg_TCT_I+	TRR-TCT2-1	chr17:8024243-8024330	chr17	8024243	8024330	II	74	55	64.5	6477	0	6.10553	6792	0	6.17374	6.13964	O		81	60	70.5	1872	0	4.24225	1583	0	4.00448	4.12336	O		88	73	80.5	4115	0	5.22925	3995	0	5.18687	5.20806	O		69	77	73	1011	0	3.33725	1038
chr17_5_tRNAGly_GCC+	TRG-GCC2-6	chr17:8029064-8029134	chr17	8029064	8029134	II	86	64	75	9779	0	6.54564	10878	0	6.69885	6.62225	O		58	126	92	4998	0	5.36503	4490	0	5.21137	5.2882	O		43	54	48.5	8940	0	6.83627	7989	0	6.67459	6.75543	O		66	109	87.5	3909	0	5.0671	4175
chr17_41_tRNASer_CGA-	TRS-CGA1-1	chr17:8042199-8042280	chr17	8042199	8042280	II	21	37	29	9193	0	7.28838	10369	0	7.46151	7.37495	O		46	60	53	3986	0	5.5965	3195	0	5.28004	5.43827	O		29	50	39.5	8165	0	6.88159	6918	0	6.64344	6.76251	O		44	76	60	2824	0	4.98692	2798
chr17_40_tRNAThr_AGT-	TRT-AGT5-1	chr17:8042770-8042843	chr17	8042770	8042843	II	30	72	51	8130	0	6.6545	9545	0	6.88521	6.76986	O		126	75	100.5	2726	0	4.40045	2443	0	4.24414	4.3223	O		48	55	51.5	5699	0	6.13534	5597	0	6.10942	6.12238	O		56	83	69.5	1656	0	4.08276	1931
chr17_6_tRNATrp_CCA+	TRW-CCA3-3	chr17:8089676-8089747	chr17	8089676	8089747	II	69	123	96	10498	0	6.38466	10942	0	6.44426	6.41446	O		119	57	88	5055	0	5.42939	3908	0	5.0606	5.245	O		72	67	69.5	8722	0	6.45877	8247	0	6.37827	6.41852	O		106	60	83	2732	0	4.61132	2792
chr17_7_tRNASer_GCT+	TRS-GCT4-3	chr17:8090184-8090265	chr17	8090184	8090265	II	98	43	70.5	25417	0	7.98416	32152	0	8.32291	8.15354	O		79	72	75.5	14012	0	7.05636	11862	0	6.8166	6.93648	O		85	100	92.5	20881	0	7.41534	26945	0	7.7827	7.59902	O		118	92	105	8739	0	6.02138	10646
chr17_8_tRNAThr_AGT+	TRT-AGT1-1	chr17:8090478-8090551	chr17	8090478	8090551	II	90	45	67.5	21312	0	7.77408	27012	0	8.11558	7.94483	O		52	46	49	8618	0	6.77437	7731	0	6.61825	6.69631	O		102	102	102	16244	0	6.94589	21077	0	7.32104	7.13346	O		62	51	56.5	5518	0	6.00312	7264
chr17_9_tRNAIle_AAT+	TRI-AAT5-5	chr17:8090911-8090984	chr17	8090911	8090984	II	102	37	69.5	13606	0	7.09851	15387	0	7.27561	7.18706	O		33	41	37	6680	0	6.64601	6065	0	6.50732	6.57666	O		73	60	66.5	11150	0	6.85618	12184	0	6.98379	6.91998	O		28	42	35	5751	0	6.47474	6274
chr17_39_tRNATrp_CCA-	TRW-CCA1-1	chr17:8124187-8124258	chr17	8124187	8124258	II	28	30	29	12460	0	7.72584	14018	0	7.89543	7.81064	O		35	29	32	5473	0	6.47181	5016	0	6.34673	6.40927	O		60	35	47.5	9982	0	7.01332	11336	0	7.19631	7.10482	O		46	43	44.5	3909	0	5.72445	4439
chr17_10_tRNAGly_TCC+	TRG-TCC3-1	chr17:8124866-8124937	chr17	8124866	8124937	II	77	70	73.5	11744	0	6.82983	13140	0	6.99148	6.91066	O		33	124	78.5	6784	0	5.97273	5443	0	5.65656	5.81465	O		110	89	99.5	10496	0	6.34486	10317	0	6.32012	6.33249	O		115	135	125	4939	0	5.00262	5362
chr17_38_tRNAAsp_GTC-	TRD-GTC2-11	chr17:8125556-8125627	chr17	8125556	8125627	II	53	99	76	10812	0	6.67642	11697	0	6.78963	6.73302	O		82	23	52.5	5321	0	6.01927	4530	0	5.7885	5.90388	O		53	37	45	10082	0	7.07496	9204	0	6.94392	7.00944	O		52	60	56	4691	0	5.77861	4909
chr17_37_tRNAPro_CGG-	TRP-CGG1-3	chr17:8126151-8126222	chr17	8126151	8126222	II	130	51	90.5	14116	0	6.87522	14542	0	6.91802	6.89662	O		169	121	145	5779	0	5.05286	4749	0	4.77128	4.91207	O		112	75	93.5	10756	0	6.44851	11312	0	6.52102	6.48476	O		122	124	123	3900	0	4.68293	4119
chr17_36_tRNAThr_AGT-	TRT-AGT1-2	chr17:8129553-8129626	chr17	8129553	8129626	II	34	46	40	12290	0	7.45943	14036	0	7.65064	7.55504	O		55	15	35	5483	0	6.40625	5374	0	6.37744	6.39185	O		31	33	32	11346	0	7.51951	10613	0	7.42342	7.47147	O		2	54	28	4847	0	6.3938	4853
chr17_35_tRNASer_AGA-	TRS-AGA2-6	chr17:8129928-8130009	chr17	8129928	8130009	II	41	59	50	14238	0	7.47857	15938	0	7.64097	7.55977	O		44	55	49.5	5959	0	6.23522	5569	0	6.13807	6.18664	O		48	52	50	13254	0	7.37547	12140	0	7.24911	7.31229	O		25	69	47	4893	0	5.99854	5147
chr17_34_tRNAIle_AAT-	TRI-AAT4-1	chr17:8130309-8130382	chr17	8130309	8130382	II	47	41	44	10129	0	7.10102	11530	0	7.2874	7.19421	O		55	29	42	4590	0	6.00375	4049	0	5.82407	5.91391	O		26	40	33	9091	0	7.1777	8791	0	7.12945	7.15357	O		61	53	57	3633	0	5.39587	3826
chr17_11_tRNASup_CTA+	TR*-CTA1-1	chr17:15408685-15408758	chr17	15408685	15408758	II	23	82	52.5	47	3.2	-0.0995357	54	6.35	0.0259952	-0.0367702	NO		61	77	69	42	6.37	-0.459432	46	5.05	-0.381429	-0.42043	NO		63	67	65	51	7.05	-0.230006	45	4.27	-0.341037	-0.285521	NO		61	88	74.5	56	3.99	-0.281094	51
TOM1L2_Intronic	N/A	chr17:17863453-17863740	chr17	17863453	17863740	other	90	39	64.5	1801	0	4.27617	1950	0	4.38904	4.33261	O		17	13	15	904	0	4.37543	728	0	4.0742	4.22481	O		49	115	82	1600	0	3.8633	1684	0	3.9358	3.89955	O		51	40	45.5	690	0	3.25345	736
AluJb_SINE_Alu_17863453	N/A	chr17:17863509-17863951	chr17	17863509	17863951	II	100	66	83	1838	0	4.0471	1985	0	4.15639	4.10174	O		61	16	38.5	920	0	3.79375	747	0	3.50374	3.64875	O		66	125	95.5	1628	0	3.72368	1707	0	3.79084	3.75726	O		79	91	85	721	0	2.70718	759
chr17_12_tRNATrp_CCA+	TRW-CCA2-1	chr17:19411494-19411565	chr17	19411494	19411565	II	44	57	50.5	12686	0	7.30344	13527	0	7.39583	7.34964	O		82	20	51	9400	0	6.86319	8262	0	6.67765	6.77042	O		28	43	35.5	10609	0	7.34365	11764	0	7.49234	7.418	O		56	69	62.5	6669	0	6.17835	7909
chr17_33_Pseudo_TTG-	NMTRQ-TTG12-1	chr17:19506587-19506658	chr17	19506587	19506658	II	17	22	19.5	16	1.47	-0.105795	11	5.09	-0.271805	-0.1888	NO		66	36	51	19	0	-0.72514	28	0.42	-0.481869	-0.603505	NO		24	26	25	31	2.45	0.149378	23	2.86	-0.0534393	0.0479692	NO		22	12	17	24	0.32	0.200299	30
chr17_13_tRNAGly_CCC+	TRG-CCC3-1	chr17:19764175-19764245	chr17	19764175	19764245	II	39	37	38	294	0	2.25239	373	0	2.56717	2.40978	O		58	46	52	107	0	0.74048	111	0	0.781999	0.76124	NO		21	64	42.5	341	0	2.35537	297	0	2.17324	2.2643	O		45	38	41.5	98	0	0.840129	91
AluY_SINE_Alu_19904648	N/A	chr17:19904648-19904827	chr17	19904648	19904827	II	51	77	64	38	0	-0.467126	46	0	-0.306661	-0.386894	NO		33	64	48.5	47	0	-0.0278342	34	0	-0.294621	-0.161227	NO		74	58	66	43	0	-0.395138	44	0	-0.375509	-0.385324	NO		60	51	55.5	37	0	-0.351763	42
chr17_32_Pseudo_TGA-	NMTRS-TGA3-1	chr17:22028179-22028247	chr17	22028179	22028247	II	16	17	16.5	27	0	0.293731	28	0	0.318822	0.306277	NO		9	35	22	30	0	0.206451	38	0	0.387023	0.296737	NO		37	37	37	25	0	-0.284729	29	0	-0.183446	-0.234088	NO		19	20	19.5	29	0	0.253286	33
chr17_14_tRNAThr_CGT+	TRT-CGT4-1	chr17:29877093-29877164	chr17	29877093	29877164	II	24	72	48	13663	0	7.45575	18417	0	7.8857	7.67072	O		46	18	32	10245	0	7.37265	8187	0	7.0502	7.21143	O		25	69	47	13349	0	7.4409	13826	0	7.49144	7.46617	O		55	62	58.5	6616	0	6.23067	7582
chr17_31_tRNAAsn_GTT-	TRN-GTT2-5	chr17:36908034-36908107	chr17	36908034	36908107	II	84	60	72	7919	0	6.28413	8271	0	6.34664	6.31539	O		14	46	30	5035	0	6.39946	4219	0	6.14602	6.27274	O		71	79	75	6571	0	5.97422	6513	0	5.96149	5.96786	O		61	55	58	3990	0	5.51355	4069
chr17_30_tRNACys_GCA-	TRC-GCA24-1	chr17:36989975-36990046	chr17	36989975	36990046	II	64	55	59.5	63	0	0.055343	65	0	0.0860398	0.0706914	NO		56	64	60	35	0	-0.469485	34	0	-0.491853	-0.480669	NO		39	39	39	87	0	0.76184	74	0	0.591915	0.676878	NO		39	43	41	48	0	0.135655	39
chr17_29_tRNACys_GCA-	TRC-GCA14-1	chr17:37017937-37018008	chr17	37017937	37018008	II	32	20	26	744	0	3.78883	898	0	4.05063	3.91973	O		8	40	24	182	0	1.97303	174	0	1.91754	1.94529	O		12	17	14.5	576	0	3.76744	526	0	3.64321	3.70532	O		11	30	20.5	168	0	1.97115	149
chr17_15_tRNACys_GCA+	TRC-GCA2-2	chr17:37023898-37023969	chr17	37023898	37023969	II	29	53	41	5946	0	6.39522	6562	0	6.53675	6.46599	O		48	12	30	3060	0	5.6865	2861	0	5.59046	5.63848	O		49	25	37	5652	0	6.40609	4589	0	6.10728	6.25668	O		69	42	55.5	2585	0	4.93474	2342
chr17_28_tRNACys_GCA-	TRC-GCA4-1	chr17:37025545-37025616	chr17	37025545	37025616	II	67	67	67	7167	0	6.21327	7654	0	6.30773	6.2605	O		46	126	86	3461	0	4.91144	3043	0	4.72745	4.81945	O		84	64	74	5923	0	5.83896	5150	0	5.6383	5.73863	O		70	137	103.5	2946	0	4.47846	2846
chr17_27_tRNACys_GCA-	TRC-GCA2-3	chr17:37309987-37310058	chr17	37309987	37310058	II	39	44	41.5	9125	0	7.00047	10155	0	7.15429	7.07738	O		28	33	30.5	5370	0	6.47988	5051	0	6.39203	6.43596	O		30	70	50	8567	0	6.74769	7502	0	6.55689	6.65229	O		34	47	40.5	4800	0	6.09826	5231
chr17_26_tRNACys_GCA-	TRC-GCA2-4	chr17:37310744-37310815	chr17	37310744	37310815	II	52	48	50	11497	0	7.1708	12815	0	7.32699	7.2489	O		21	70	45.5	7631	0	6.66491	6867	0	6.51335	6.58913	O		58	82	70	9537	0	6.57999	10291	0	6.68944	6.63472	O		86	90	88	6108	0	5.70091	7018
chr17_25_tRNASeC_TCA-	TRZ-TCA3-1	chr17:38273553-38273626	chr17	38273553	38273626	III	29	43	36	67	0	0.555519	37	0	0.0216951	0.288607	NO		86	27	56.5	44	0	-0.225175	34	0	-0.434628	-0.329902	NO		63	43	53	34	0	-0.375039	41	0	-0.225292	-0.300166	NO		17	47	32	44	0	0.255257	36
chr17_16_tRNAGln_TTG+	TRQ-TTG1-1	chr17:47269890-47269961	chr17	47269890	47269961	II	86	118	102	15583	0	6.88607	16904	0	7.00324	6.94465	O		38	109	73.5	9767	0	6.56464	7287	0	6.14355	6.35409	O		106	86	96	13251	0	6.7198	12457	0	6.63086	6.67533	O		90	81	85.5	8038	0	6.12625	8783
chr17_17_tRNASup_TTA+	TR*-TTA1-1	chr17:58863593-58863663	chr17	58863593	58863663	II	54	18	36	34	0	-0.0443941	33	0	-0.0671142	-0.0557542	NO		14	18	16	30	0	0.383329	61	0	0.984233	0.683781	NO		5	10	7.5	35	0	0.793549	27	0	0.604071	0.69881	NO		66	39	52.5	39	0	-0.257798	37
chr17_24_tRNAThr_AGT-	TRT-AGT7-1	chr17:62526918-62526991	chr17	62526918	62526991	II	57	87	72	49	0	-0.368645	59	0	-0.196692	-0.282668	NO		55	49	52	43	0	-0.167727	39	0	-0.249028	-0.208377	NO		63	56	59.5	41	0	-0.334069	60	0	0.00803732	-0.163016	NO		44	50	47	41	0	-0.117039	37
chr17_23_tRNAArg_CCG-	TRR-CCG2-1	chr17:66016013-66016085	chr17	66016013	66016085	II	20	22	21	8400	0	7.36889	10206	0	7.64894	7.50892	O		9	29	19	5584	0	6.8401	4581	0	6.55615	6.69813	O		15	20	17.5	7722	0	7.3505	7960	0	7.39412	7.37231	O		8	25	16.5	4157	0	6.49254	4630
chr17_22_tRNAUndet_???-	TRU-NNN5-1	chr17:66390957-66391031	chr17	66390957	66391031	II	60	61	60.5	55	0	-0.090455	58	0	-0.0404143	-0.0654346	NO		42	55	48.5	41	0	-0.144874	42	0	-0.124696	-0.134785	NO		39	106	72.5	47	0	-0.412694	46	0	-0.431553	-0.422123	NO		47	57	52	33	0	-0.380272	46
chr17_18_tRNAArg_CCT+	TRR-CCT1-1	chr17:73030001-73030073	chr17	73030001	73030073	II	101	19	60	16166	0	7.4915	17287	0	7.58805	7.53977	O		108	160	134	9194	0	5.81362	7251	0	5.47237	5.643	O		79	71	75	13385	0	6.99731	13460	0	7.00536	7.00134	O		99	107	103	5635	0	5.41258	6338
chr17_21_tRNAArg_CCT-	TRR-CCT2-1	chr17:73030526-73030598	chr17	73030526	73030598	II	33	76	54.5	17143	0	7.66698	20548	0	7.92794	7.79746	O		144	87	115.5	9738	0	6.06897	7343	0	5.66316	5.86607	O		187	117	152	13994	0	6.26782	16086	0	6.46841	6.36811	O		147	156	151.5	5983	0	5.05004	6330
chr17_19_tRNAArg_TCG+	TRR-TCG3-1	chr17:73031208-73031280	chr17	73031208	73031280	II	82	95	88.5	14214	0	6.90932	15964	0	7.0765	6.99291	O		29	109	69	9239	0	6.54884	7525	0	6.25386	6.40135	O		95	109	102	11501	0	6.44884	11956	0	6.50467	6.47675	O		75	115	95	6981	0	5.80962	7393
chr17_20_tRNAMet_CAT-	TRX-CAT1-8	chr17:80452597-80452668	chr17	80452597	80452668	II	72	120	96	19532	0	7.27849	22417	0	7.47696	7.37772	O		107	72	89.5	13033	0	6.77233	11046	0	6.53428	6.65331	O		72	66	69	14755	0	7.22249	18962	0	7.58375	7.40312	O		73	115	94	9606	0	6.28002	11919
PTPRM	N/A	chr18:8026571-8026971	chr18	8026571	8026971	other	37	33	35	33	0	-0.0450879	20	0	-0.378512	-0.2118	NO		50	29	39.5	33	0	-0.141661	29	0	-0.236298	-0.18898	NO		19	13	16	19	0	0.0911479	16	0	0	0.0455739	NO		18	30	24	32	0	0.199309	35
AluY_SINE_Alu_37641843	N/A	chr18:37641843-37642141	chr18	37641843	37642141	II	60	37	48.5	35	0	-0.272253	41	0	-0.144874	-0.208563	NO		62	135	98.5	42	0	-0.8357	22	0	-1.30518	-1.07044	NO		78	39	58.5	48	0	-0.182203	38	0	-0.380143	-0.281173	NO		48	57	52.5	40	0	-0.237039	27
chr18_1_tRNAGlu_CTC+	TRE-CTC6-1	chr18:43299751-43299822	chr18	43299751	43299822	II	34	43	38.5	48	0	0.18737	16	0	-0.57447	-0.19355	NO		18	78	48	45	0	-0.0565835	24	0	-0.530515	-0.293549	NO		73	50	61.5	35	0	-0.493332	30	0	-0.608809	-0.551071	NO		45	90	67.5	33	0	-0.63005	31
chr18_4_tRNALys_CTT-	TRK-CTT6-1	chr18:43669271-43669343	chr18	43669271	43669343	II	21	14	17.5	35	0	0.452512	41	0	0.579892	0.516202	NO		42	89	65.5	43	0	-0.387604	35	0	-0.555061	-0.471333	NO		74	33	53.5	35	0	-0.361336	31	0	-0.452967	-0.407152	NO		22	49	35.5	30	0	-0.126532	44
chr18_2_Pseudo_TCC+	TRG-TCC5-1	chr18:55345854-55345925	chr18	55345854	55345925	II	17	19	18	8	11.11	-0.337035	10	60	-0.263034	-0.300035	NO		16	4	10	14	35.71	0.137504	13	35.71	0.104337	0.12092	NO		23	13	18	10	18.18	-0.263034	5	16.66	-0.455679	-0.359357	NO		11	9	10	8	10	-0.0740006	9
chr18_3_Pseudo_TCC+	TRG-TCC6-1	chr18:55346177-55346248	chr18	55346177	55346248	II	16	20	18	18	2.56	0	10	30	-0.263034	-0.131517	NO		17	20	18.5	8	29.41	-0.351985	21	11.11	0.0725125	-0.139736	NO		14	23	18.5	10	9.09	-0.277985	9	5.26	-0.314511	-0.296248	NO		13	12	12.5	7	5.88	-0.199938	9
AluSg_SINE_Alu	N/A	chr19:357075-357378	chr19	357075	357378	II	133	118	125.5	131	0	0.0501461	156	0	0.258388	0.154267	NO		166	53	109.5	160	0	0.445734	145	0	0.32709	0.386412	NO		210	93	151.5	148	0	-0.0280923	129	0	-0.190943	-0.109518	NO		188	106	147	105	0	-0.39079	149
U6-9	RNU6-9	chr19:893483-893590	chr19	893483	893590	III	40	87	63.5	7121	3.8	6.25703	7485	4.4	6.32866	6.29285	O		56	22	39	4166	4.71	5.92627	3717	5.06	5.763	5.84464	O		41	43	42	6140	4.34	6.42113	5724	4.69	6.32042	6.37078	O		51	45	48	3481	5.07	5.49226	3692
U6-2	RNU6-2	chr19:1021520-1021627	chr19	1021520	1021627	III	48	38	43	13276	2.06	7.50996	16347	2.08	7.80956	7.65976	O		37	25	31	9193	2.04	7.24028	8300	2.17	7.09336	7.16682	O		107	39	73	11083	2.34	6.75346	13818	2.04	7.07089	6.91217	O		162	30	96	6653	2.45	5.729	8354
chr19_14_tRNAPhe_GAA-	TRF-GAA1-6	chr19:1383361-1383433	chr19	1383361	1383433	II	70	114	92	20634	0	7.40409	24326	0	7.64125	7.52267	O		75	111	93	10707	0	6.44779	6285	0	5.68205	6.06492	O		104	115	109.5	15691	0	6.81628	16406	0	6.88045	6.84837	O		77	77	77	7857	0	6.20379	8019
chr19_1_tRNAAsn_GTT+	TRN-GTT2-6	chr19:1383562-1383635	chr19	1383562	1383635	II	35	115	75	16426	0	7.29208	19331	0	7.52662	7.40935	O		73	101	87	9909	0	6.40852	5653	0	5.60207	6.0053	O		40	127	83.5	13372	0	6.88361	13762	0	6.925	6.9043	O		60	77	68.5	6790	0	6.1135	7217
chr19_2_tRNAGly_TCC+	TRG-TCC1-1	chr19:4724082-4724153	chr19	4724082	4724153	II	27	50	38.5	10091	0	7.20703	11260	0	7.36473	7.28588	O		28	95	61.5	7973	0	6.45063	6846	0	6.23165	6.34114	O		25	18	21.5	9106	0	7.47085	10167	0	7.62936	7.5501	O		52	62	57	6056	0	6.12834	7338
chr19_13_tRNAVal_CAC-	TRV-CAC3-1	chr19:4724647-4724719	chr19	4724647	4724719	II	24	28	26	7892	0	7.14429	8700	0	7.28441	7.21435	O		12	7	9.5	4523	0	6.84882	4296	0	6.77504	6.81193	O		29	40	34.5	7192	0	6.80696	7694	0	6.90391	6.85543	O		24	19	21.5	3815	0	6.22227	4537
chr19_12_Pseudo_TTG-	TRQ-TTG8-1	chr19:9150356-9150428	chr19	9150356	9150428	II	63	28	45.5	49	0	0.065376	39	0	-0.12988	-0.0322521	NO		39	12	25.5	61	0	0.713379	42	0	0.375509	0.544444	NO		28	56	42	37	0	-0.103836	57	0	0.273018	0.0845913	NO		22	43	32.5	50	0	0.356144	60
chr19_3_tRNALys_TTT+	TRK-TTT16-1	chr19:19852207-19852277	chr19	19852207	19852277	II	32	55	43.5	63	0	0.339486	50	0	0.122256	0.230871	NO		25	12	18.5	34	0	0.400087	31	0	0.330824	0.365456	NO		16	35	25.5	37	0	0.271673	54	0	0.597902	0.434787	NO		19	27	23	37	0	0.338169	30
chr19_4_tRNAThr_AGT+	TRT-AGT1-3	chr19:33667963-33668036	chr19	33667963	33668036	II	56	59	57.5	10553	0	6.91825	10853	0	6.95858	6.93841	O		50	72	61	6708	0	6.21031	4617	0	5.67429	5.9423	O		60	41	50.5	9353	0	6.86492	7303	0	6.50927	6.68709	O		18	46	32	5190	0	6.39564	5086
chr19_5_tRNALys_CTT+	TRK-CTT10-1	chr19:36066750-36066822	chr19	36066750	36066822	II	12	17	14.5	39	0	0.632791	75	0	1.23851	0.935652	NO		65	55	60	66	0	0.0931094	54	0	-0.0995357	-0.00321313	NO		40	35	37.5	46	0	0.171112	55	0	0.332575	0.251844	NO		44	36	40	40	0	0	51
chr19_11_Pseudo_???-	TRU-NNN10-1	chr19:36111460-36111530	chr19	36111460	36111530	II	112	25	68.5	80	0	0.159308	75	0	0.0921937	0.125751	NO		59	44	51.5	63	0	0.190431	81	0	0.445688	0.318059	NO		118	47	82.5	77	0	-0.0723142	52	0	-0.456229	-0.264272	NO		98	79	88.5	65	0	-0.318888	87
chr19_10_tRNAIle_TAT_I-	TRI-TAT1-1	chr19:39902808-39902900	chr19	39902808	39902900	II	22	44	33	7804	0	6.95825	7844	0	6.9656	6.96193	O		40	47	43.5	3044	0	5.38623	2679	0	5.20387	5.29505	O		61	32	46.5	5563	0	6.19202	4894	0	6.00823	6.10012	O		35	40	37.5	1684	0	4.66634	1845
chr19_9_Pseudo_TTT-	TRK-TTT10-1	chr19:41748142-41748214	chr19	41748142	41748214	II	33	45	39	37	0	-0.0424353	35	0	-0.0861566	-0.064296	NO		44	81	62.5	51	0	-0.191531	42	0	-0.361456	-0.276494	NO		58	5	31.5	39	0	0.16601	40	0	0.186769	0.176389	NO		24	16	20	39	0	0.464668	39
chr19_8_tRNASeC(e)_TCA-	TRZ-TCA1-1	chr19:45981860-45981945	chr19	45981860	45981945	III	25	18	21.5	7132	0	7.11965	8307	0	7.33881	7.22923	O		67	37	52	5382	0	6.04439	4794	0	5.87846	5.96143	O		39	37	38	7634	0	6.81642	7503	0	6.79155	6.80398	O		82	47	64.5	3757	0	5.3246	4196
SNAR-A12_SNAR-A13_1	SNAR-A12	chr19:48410814-48411214	chr19	48410814	48411214	II	151	122	136.5	501	100	1.67319	521	100	1.72653	1.69986	O		148	157	152.5	248	100	0.607188	210	100	0.395138	0.501163	NO		152	151	151.5	306	100	0.888492	272	100	0.734579	0.811535	NO		158	138	148	162	100	0.109229	182
SNAR-A1_SNAR-A2_1	SNAR-A1	chr19:48421560-48421960	chr19	48421560	48421960	II	180	152	166	893	100	2.23548	953	100	2.32634	2.28091	O		182	204	193	414	100	0.993516	318	100	0.642044	0.81778	NO		199	175	187	536	100	1.38311	454	100	1.15731	1.27021	NO		209	178	193.5	257	100	0.360776	282
SNAR-A3-A11_SNAR-A14_1	SNAR-A3	chr19:48426872-48427272	chr19	48426872	48427272	II	220	219	219.5	1041	96.53	2.10185	1110	96.69	2.19192	2.14688	O		232	282	257	506	90.93	0.901182	370	93.35	0.478949	0.690066	NO		233	217	225	614	94.26	1.33656	524	95.81	1.11939	1.22798	NO		269	239	254	312	93.89	0.268105	313
SNAR-A1_SNAR-A2_2	SNAR-A2	chr19:48437317-48437717	chr19	48437317	48437717	II	193	159	176	898	100	2.17148	957	100	2.26041	2.21594	O		191	212	201.5	421	100	0.962115	322	100	0.604563	0.783339	NO		212	191	201.5	541	100	1.30248	461	100	1.08471	1.19359	NO		213	193	203	265	100	0.340385	288
SNAR-A12_SNAR-A13_2	SNAR-A13	chr19:48448058-48448458	chr19	48448058	48448458	II	183	142	162.5	521	100	1.51719	540	100	1.5661	1.54165	NO		189	187	188	264	100	0.431488	229	100	0.248624	0.340056	NO		198	174	186	328	100	0.728928	296	100	0.593841	0.661384	NO		195	167	181	180	100	-0.00685367	209
chr19_7_tRNALys_TTT-	TRK-TTT12-1	chr19:50037933-50038005	chr19	50037933	50038005	II	32	48	40	49	0	0.174498	84	0	0.703607	0.439052	NO		66	38	52	61	0	0.150243	41	0	-0.207805	-0.0287811	NO		60	52	56	52	0	-0.0687128	48	0	-0.140863	-0.104788	NO		63	45	54	47	0	-0.125531	50
SNAR-A3-A11_SNAR-A14_2	SNAR-A4	chr19:50595614-50596014	chr19	50595614	50596014	II	240	224	232	1397	100	2.44535	1535	100	2.57852	2.51194	O		258	280	269	646	100	1.17688	503	100	0.83399	1.00543	NO		264	245	254.5	828	100	1.59255	711	100	1.38104	1.4868	NO		284	260	272	403	100	0.519818	421
SNAR-A3-A11_SNAR-A14_3	SNAR-A14	chr19:50600952-50601352	chr19	50600952	50601352	II	330	276	303	1646	100	2.33143	1717	100	2.39129	2.36136	O		346	356	351	740	100	1.01507	577	100	0.671906	0.843486	NO		366	304	335	936	100	1.40413	808	100	1.19905	1.30159	NO		371	294	332.5	484	100	0.503787	488
AluSx_SINE_55294966	N/A	chr19:50602858-50603138	chr19	50602858	50603138	II	322	348	335	247	41.25	-0.39801	295	36.3	-0.167457	-0.282734	NO		381	373	377	259	36.06	-0.493959	255	36.64	-0.514067	-0.504013	NO		324	292	308	238	43.27	-0.33479	287	37.97	-0.0925404	-0.213665	NO		288	373	330.5	221	39.99	-0.522312	260
SNAR-A3-A11_SNAR-A14_4	SNAR-A5	chr19:50604016-50604416	chr19	50604016	50604416	II	330	276	303	1646	100	2.33143	1717	100	2.39129	2.36136	O		346	356	351	741	100	1.01694	577	100	0.671906	0.844423	NO		366	304	335	936	100	1.40413	808	100	1.19905	1.30159	NO		370	294	332	484	100	0.505779	488
SNAR-A3-A11_SNAR-A14_5	SNAR-A6	chr19:50607112-50607512	chr19	50607112	50607512	II	329	277	303	1637	100	2.32366	1711	100	2.38632	2.35499	O		347	354	350.5	739	100	1.01509	576	100	0.671421	0.843254	NO		364	303	333.5	932	100	1.40408	802	100	1.19463	1.29935	NO		375	288	331.5	482	100	0.502148	486
SNAR-A3-A11_SNAR-A14_6	SNAR-A7	chr19:50610172-50610572	chr19	50610172	50610572	II	240	231	235.5	1394	100	2.42317	1531	100	2.55569	2.48943	O		258	275	266.5	643	100	1.18257	503	100	0.846103	1.01434	NO		264	247	255.5	831	100	1.59252	707	100	1.36817	1.48035	NO		284	256	270	400	100	0.519374	419
SNAR-A3-A11_SNAR-A14_7	SNAR-A8	chr19:50615532-50615932	chr19	50615532	50615932	II	240	231	235.5	1394	100	2.42317	1530	100	2.55476	2.48896	O		256	277	266.5	643	100	1.18257	503	100	0.846103	1.01434	NO		264	247	255.5	831	100	1.59252	707	100	1.36817	1.48035	NO		290	255	272.5	399	100	0.504043	419
SNAR-A3-A11_SNAR-A14_8	SNAR-A9	chr19:50620873-50621273	chr19	50620873	50621273	II	241	227	234	1396	99.4	2.43336	1534	99.59	2.56663	2.5	O		258	274	266	644	99.67	1.18715	505	99.24	0.853942	1.02055	NO		264	247	255.5	830	99.55	1.59085	709	99.43	1.37208	1.48146	NO		287	257	272	402	99.56	0.516483	421
SNAR-A3-A11_SNAR-A14_9	SNAR-A10	chr19:50626232-50626632	chr19	50626232	50626632	II	236	227	231.5	1369	100	2.41951	1518	100	2.56552	2.49252	O		256	268	262	636	100	1.18955	496	100	0.849094	1.01932	NO		260	249	254.5	820	100	1.57903	696	100	1.35154	1.46529	NO		279	253	266	398	100	0.532014	413
SNAR-A3-A11_SNAR-A14_10	SNAR-A11	chr19:50631552-50631952	chr19	50631552	50631952	II	237	223	230	1370	100	2.42884	1519	100	2.57475	2.5018	O		256	267	261.5	638	100	1.19635	498	100	0.857042	1.0267	NO		261	249	255	820	100	1.5765	698	100	1.35298	1.46474	NO		279	253	266	400	100	0.538739	414
chr19_6_tRNALys_CTT-	TRK-CTT11-1	chr19:52425396-52425468	chr19	52425396	52425468	II	58	34	46	76	0	0.479993	80	0	0.533432	0.506713	NO		96	74	85	64	0	-0.290901	49	0	-0.541709	-0.416305	NO		72	62	67	58	0	-0.140481	64	0	-0.045324	-0.0929026	NO		136	38	87	34	0	-0.870365	72
chr20_7_Pseudo_CTC-	TRE-CTC10-1	chr20:13970470-13970541	chr20	13970470	13970541	II	6	16	11	8	0	-0.109624	5	0	-0.228269	-0.168947	NO		2	3	2.5	11	0	0.335184	18	0	0.562595	0.448889	NO		0	10	5	17	0	0.425306	7	0	0.0801703	0.252738	NO		2	15	8.5	12	0	0.125531	7
chr20_1_tRNAGln_CTG+	TRQ-CTG17-1	chr20:17855142-17855219	chr20	17855142	17855219	II	34	56	45	489	0	2.79077	572	0	3.0048	2.89779	O		69	58	63.5	217	0	1.40147	246	0	1.56163	1.48155	NO		26	52	39	384	0	2.58496	356	0	2.48393	2.53445	O		66	62	64	135	0	0.811733	163
chr20_2_Pseudo_AGA+	TRS-AGA7-1	chr20:30088703-30088774	chr20	30088703	30088774	II	64	38	51	93	0	0.602665	84	0.62	0.49304	0.547852	NO		36	107	71.5	61	0	-0.157541	57	0	-0.222392	-0.189967	NO		48	50	49	73	0	0.38272	60	1.63	0.188072	0.285396	NO		90	99	94.5	78	0	-0.205114	70
chr20_3_Pseudo_CAC+	TRV-CAC14-1	chr20:43951001-43951073	chr20	43951001	43951073	II	86	38	62	42	0	-0.353637	68	0	0.0911479	-0.131245	NO		40	38	39	40	0	0.0207586	50	0	0.213404	0.117081	NO		43	36	39.5	59	0	0.356792	50	0	0.202987	0.27989	NO		92	31	61.5	40	0	-0.386417	51
chr20_6_tRNALeu_AAG-	TRL-AAG6-1	chr20:48952342-48952423	chr20	48952342	48952423	II	62	44	53	50	0	-0.0531113	43	0	-0.185215	-0.119163	NO		76	70	73	49	0	-0.38272	46	0	-0.438573	-0.410646	NO		37	24	30.5	44	0	0.29059	50	0	0.403065	0.346827	NO		57	47	52	45	0	-0.128733	43
chr20_5_Pseudo_AAT-	TRI-AAT12-1	chr20:51218338-51218415	chr20	51218338	51218415	II	24	74	49	28	0	-0.4458	16	0	-0.780219	-0.613009	NO		49	24	36.5	22	0	-0.354843	33	0	-0.0780025	-0.216423	NO		20	10	15	34	0	0.508147	25	0	0.289507	0.398827	NO		11	10	10.5	28	0	0.518131	21
chr20_4_Pseudo_TAA-	NMTRL-TAA5-1	chr20:55933428-55933502	chr20	55933428	55933502	II	18	35	26.5	38	0	0.267284	46	0	0.427749	0.347516	NO		25	16	20.5	28	0	0.19977	42	0	0.511714	0.355742	NO		7	32	19.5	43	0	0.560468	33	0	0.347923	0.454196	NO		20	30	25	44	0	0.428094	25
chr21_1_tRNASup_TTA+	TR*-TTA2-1	chr21:15926516-15926586	chr21	15926516	15926586	II	20	12	16	11	0	-0.16601	14	0	-0.0641303	-0.11507	NO		59	16	37.5	17	0	-0.522227	12	0	-0.684498	-0.603362	NO		2	9	5.5	16	0	0.373815	19	0	0.464963	0.419389	NO		9	21	15	15	0	0	18
chr21_2_tRNAGly_GCC-	TRG-GCC1-5	chr21:18827107-18827177	chr21	18827107	18827177	II	26	60	43	10172	0	7.12674	11416	0	7.29273	7.20974	O		53	50	51.5	4942	0	5.93088	4258	0	5.71736	5.82412	O		44	75	59.5	8036	0	6.49382	7822	0	6.45503	6.47443	O		53	66	59.5	4201	0	5.56297	4187
MER41B-int_LTR_ERV1	N/A	chr22:37585520-37591507	chr22	37585520	37591507	other	283	319	301	1721	0.02	2.40328	1805	0	2.47088	2.43708	O		252	283	267.5	706	0.07	1.30682	674	0	1.24269	1.27475	NO		207	284	245.5	1142	0	2.08885	1129	0.04	2.07276	2.0808	O		185	256	220.5	711	0.18	1.56466	742
AluSg/x_SINE_Alu_42443389	N/A	chr22:42443389-42443595	chr22	42443389	42443595	II	53	44	48.5	34	0	-0.294621	33	0	-0.317341	-0.305981	NO		30	77	53.5	40	0	-0.254421	23	0	-0.655784	-0.455103	NO		75	58	66.5	29	0	-0.709814	15	0	-1.1006	-0.905209	NO		30	43	36.5	16	0	-0.53172	16
chr22_1_tRNASeC(e)_TCA+	TRZ-TCA2-1	chr22:44546537-44546622	chr22	44546537	44546622	III	30	63	46.5	46	4.31	-0.00946033	61	5.98	0.250407	0.120473	NO		65	105	85	30	0	-0.938599	32	1.92	-0.891294	-0.914947	NO		56	88	72	33	1.81	-0.695145	36	5.4	-0.628031	-0.661588	NO		122	62	92	43	3.67	-0.740913	48
chrX_7_tRNAIle_GAT-	TRI-GAT1-1	chrX:3756418-3756491	chrX	3756418	3756491	II	4	18	11	7	100	-0.148099	12	100	0.0347654	-0.0566666	NO		5	31	18	7	100	-0.375509	7	100	-0.375509	-0.375509	NO		13	22	17.5	12	100	-0.177538	8	100	-0.321928	-0.249733	NO		25	19	22	11	100	-0.342888	6
chrX_6_tRNAIle_GAT-	TRI-GAT1-2	chrX:3794842-3794915	chrX	3794842	3794915	II	8	24	16	26	100	0.283793	30	100	0.383329	0.333561	NO		5	52	28.5	16	100	-0.346803	13	100	-0.4441	-0.395451	NO		28	32	30	30	100	0	23	100	-0.17897	-0.0894851	NO		58	35	46.5	18	100	-0.672425	13
chrX_5_tRNAIle_GAT-	TRI-GAT1-3	chrX:3833271-3833344	chrX	3833271	3833344	II	8	24	16	26	100	0.283793	30	100	0.383329	0.333561	NO		5	52	28.5	16	100	-0.346803	13	100	-0.4441	-0.395451	NO		28	32	30	30	100	0	23	100	-0.17897	-0.0894851	NO		58	35	46.5	18	100	-0.672425	13
chrX_4_tRNAVal_TAC-	TRV-TAC1-2	chrX:18693029-18693101	chrX	18693029	18693101	II	11	46	28.5	2951	0	5.67122	3334	0	5.8456	5.75841	O		15	23	19	2043	0	5.40279	1752	0	5.18457	5.29368	O		26	31	28.5	3133	0	5.75671	2319	0	5.32747	5.54209	O		6	35	20.5	1886	0	5.24567	1822
chrX_3_Pseudo_CTC-	TRE-CTC18-1	chrX:51306112-51306183	chrX	51306112	51306183	II	118	54	86	74	0	-0.157541	69	0	-0.228624	-0.193083	NO		97	23	60	41	0	-0.342106	45	0	-0.263034	-0.30257	NO		106	25	65.5	50	0	-0.255501	72	0	0.0949965	-0.0802521	NO		71	45	58	63	0	0.0797272	65
chrX_1_Pseudo_TTG+	NMTRQ-TTG1-1	chrX:55206666-55206737	chrX	55206666	55206737	II	16	7	11.5	22	0	0.3254	20	0	0.268817	0.297109	NO		10	0	5	28	0	0.728698	11	0	0.228269	0.478483	NO		6	36	21	13	0	-0.246161	11	0	-0.314873	-0.280517	NO		4	16	10	24	0	0.432959	26
chrX_2_tRNALeu_TAA-	NMTRL-TAA4-1	chrX:55207755-55207829	chrX	55207755	55207829	II	3	22	12.5	32	0	0.544805	31	0	0.521346	0.533076	NO		19	6	12.5	30	0	0.4975	46	0	0.838537	0.668018	NO		10	31	20.5	18	0	-0.073249	41	0	0.491536	0.209143	NO		11	9	10	30	0	0.584963	29
AluY_SINE_Alu_118157931	N/A	chrX:118157931-118158236	chrX	118157931	118158236	II	54	66	60	36	0	-0.447459	28	0	-0.633872	-0.540666	NO		27	91	59	38	0	-0.388271	37	0	-0.409644	-0.398957	NO		30	39	34.5	29	0	-0.128584	30	0	-0.104337	-0.11646	NO		31	53	42	32	0	-0.215729	31
chrY_1_Pseudo_TTG-	NMTRQ-TTG8-1	chrY:8240140-8240214	chrY	8240140	8240214	II	0	0	0	0	0	0	0	0	0	0	NO		0	0	0	0	0	0	0	0	0	0	NO		0	0	0	0	0	0	0	0	0	0	NO		0	0	0	0	0	0	0
[truncated: 16 more columns]

## Sheet: Pol III genes stability
Pol III genes that do not change significantly (p>0.005) in the FBS vs SS pairwise comparison are classified as STABLE
Pol III genes that change significantly (p<0.005) in the FBS vs SS pairwise comparison are classified as UNSTABLE
Pol III genes whose POLR3D occupancy score falls below cutoff (in FBS and SS) are classified as UNBOUND
Locus annotation	Stability
chr1_92_Pseudo_GAA-	UNBOUND
chr1_46_tRNAAsp_GTC+	UNBOUND
chr14_17_tRNATyr_GTA_I-	UNBOUND
chr7_8_tRNACys_GCA+	UNBOUND
chr2_24_Pseudo_CTC-	UNBOUND
SNAR-A12_SNAR-A13_2	UNBOUND
chr1_115_tRNAAsn_GTT-	UNBOUND
chr1_113_tRNAAsn_GTT-	UNBOUND
chr6_28_tRNAIle_AAT+	UNBOUND
chr6_165_tRNAIle_AAT-	UNBOUND
chr6_26_tRNAUndet_???+	UNBOUND
chr16_31_Pseudo_TGG-	UNBOUND
chr2_18_Pseudo_CTC-	UNBOUND
chr22_1_tRNASeC(e)_TCA+	UNBOUND
chr18_4_tRNALys_CTT-	UNBOUND
chr1_20_tRNAAsn_ATT+	UNBOUND
chr6_18_tRNAAla_AGC+	UNBOUND
chr1_100_Pseudo_GAA-	UNBOUND
chr1_55_tRNALys_TTT+	UNBOUND
chr19_6_tRNALys_CTT-	UNBOUND
chr1_102_Pseudo_TTC-	UNBOUND
chr4_5_Pseudo_TTA-	UNBOUND
chr2_25_Pseudo_CTC-	UNBOUND
chr6_136_tRNAVal_AAC-	UNBOUND
chr2_15_Pseudo_CTG+	UNBOUND
chr7_1_tRNATrp_CCA+	UNBOUND
chr4_4_tRNAGln_TTG-	UNBOUND
chr1_101_tRNAAsn_GTT-	UNBOUND
chr20_2_Pseudo_AGA+	UNBOUND
chrX_6_tRNAIle_GAT-	UNBOUND
chrX_5_tRNAIle_GAT-	UNBOUND
chr16_18_tRNAGly_GCC+	UNBOUND
chr11_6_Pseudo_TGC+	UNBOUND
chr13_6_Pseudo_TTG-	UNBOUND
chr1_105_Pseudo_TTC-	UNBOUND
chr6_56_tRNAPhe_GAA+	UNBOUND
chr12_3_tRNAGln_CTG+	UNBOUND
chr7_11_tRNACys_GCA+	UNBOUND
chr1_94_tRNAGlu_TTC-	UNBOUND
hsa-mir-1978	UNBOUND
AluY_SINE_Alu_37641843	UNBOUND
chr11_10_tRNASer_AGA+	UNBOUND
chr12_16_Pseudo_TTG-	UNBOUND
chr5_24_tRNALys_CTT-	UNBOUND
chr7_7_tRNACys_GCA+	UNBOUND
chr19_5_tRNALys_CTT+	UNBOUND
chr6_122_Pseudo_TGC-	UNBOUND
chr6_116_Pseudo_GAA-	UNBOUND
chr1_127_tRNALys_CTT-	UNBOUND
chr8_1_Pseudo_CTC+	UNBOUND
chr20_7_Pseudo_CTC-	UNBOUND
chr17_30_tRNACys_GCA-	UNBOUND
chr1_61_Pseudo_TGG-	UNBOUND
chr1_22_tRNAGln_CTG+	UNBOUND
chr1_121_tRNAGln_CTG-	UNBOUND
chr12_9_Pseudo_AAT+	UNBOUND
chr12_1_tRNALys_TTT+	UNBOUND
chr7_12_tRNASer_AGA+	UNBOUND
chr1_114_tRNAGln_CTG-	UNBOUND
chr17_17_tRNASup_TTA+	UNBOUND
chr7_21_tRNACys_GCA-	UNBOUND
chr11_19_tRNATrp_CCA-	UNBOUND
chr9_1_tRNAMet_CAT+	UNBOUND
chr12_7_tRNAAsp_GTC+	UNBOUND
chr6_92_tRNAMet_CAT-	UNBOUND
chr3_5_tRNALeu_AAG-	UNBOUND
chr14_14_tRNAGlu_TTC-	UNBOUND
chr19_12_Pseudo_TTG-	UNBOUND
chr6_32_tRNAVal_CAC+	UNBOUND
chr21_1_tRNASup_TTA+	UNBOUND
chr1_50_tRNAAsn_GTT+	UNBOUND
chr10_5_Pseudo_CTG-	UNBOUND
chr2_26_Pseudo_???-	UNBOUND
chr3_9_Pseudo_TTG-	UNBOUND
chr1_57_Pseudo_TGG+	UNBOUND
chr6_84_tRNAGln_TTG+	UNBOUND
chr1_125_Pseudo_???-	UNBOUND
chr1_8_Pseudo_CTT+	UNBOUND
chr11_7_Pseudo_CCT+	UNBOUND
chr2_10_Pseudo_TGA+	UNBOUND
chr17_1_Pseudo_???+	UNBOUND
chr17_25_tRNASeC_TCA-	UNBOUND
chr3_4_tRNAHis_GTG-	UNBOUND
chr18_2_Pseudo_TCC+	UNBOUND
chr1_136_Pseudo_???-	UNBOUND
chr6_81_tRNALeu_TAA+	UNBOUND
chr6_38_tRNAIle_AAT+	UNBOUND
chr1_104_Pseudo_GTT-	UNBOUND
AluY_SINE_Alu_62819118	UNBOUND
AluY_SINE_74760232	UNBOUND
chr3_8_tRNAGlu_CTC-	UNBOUND
chr17_11_tRNASup_CTA+	UNBOUND
chr3_12_Pseudo_GCA-	UNBOUND
chr1_88_Pseudo_CCT-	UNBOUND
chr17_33_Pseudo_TTG-	UNBOUND
chr3_1_Pseudo_CTA+	UNBOUND
chr9_8_tRNAGln_TTG-	UNBOUND
chr6_58_tRNAVal_CAC+	UNBOUND
chr1_14_Pseudo_CCT+	UNBOUND
chr1_18_Pseudo_CCT+	UNBOUND
chr2_16_Pseudo_TTT-	UNBOUND
chr1_11_tRNAAsn_GTT+	UNBOUND
chr2_17_Pseudo_TTC-	UNBOUND
chr1_95_tRNAAsn_GTT-	UNBOUND
chr5_21_Pseudo_CTG-	UNBOUND
chr1_29_tRNAGlu_CTC+	UNBOUND
chr12_15_Pseudo_TTG-	UNBOUND
chr3_10_Pseudo_CTC-	UNBOUND
chr8_3_tRNAGlu_CTC+	UNBOUND
chr1_64_tRNAGlu_TTC-	UNBOUND
chr20_5_Pseudo_AAT-	UNBOUND
chr15_6_Pseudo_CTT-	UNBOUND
chr19_7_tRNALys_TTT-	UNBOUND
chrX_7_tRNAIle_GAT-	UNBOUND
RN5S_12	UNBOUND
chr7_18_tRNACys_GCA-	UNBOUND
chr8_12_tRNATyr_GTA_I-	UNBOUND
chr7_24_Pseudo_GTA-	UNBOUND
chr7_4_Pseudo_TTG+	UNBOUND
chr8_2_Pseudo_TTT+	UNBOUND
chr10_3_Pseudo_CAA-	UNBOUND
chr1_51_Pseudo_CTT+	UNBOUND
chr1_106_tRNAHis_GTG-	UNBOUND
chr20_6_tRNALeu_AAG-	UNBOUND
5S_rRNA-related_8	UNBOUND
chr4_1_Pseudo_TTG+	UNBOUND
chr1_6_tRNAAsn_GTT+	UNBOUND
chr1_30_tRNAAsn_GTT+	UNBOUND
chr7_20_tRNACys_GCA-	UNBOUND
chr1_12_tRNAAsn_GTT+	UNBOUND
chr1_123_tRNAAsn_GTT-	UNBOUND
chr10_1_Pseudo_GGG+	UNBOUND
chr7_19_tRNACys_GCA-	UNBOUND
chr6_112_tRNAPhe_GAA-	UNBOUND
chr1_93_tRNAAsn_GTT-	UNBOUND
chr11_1_tRNALeu_CAA+	UNBOUND
chr1_124_Pseudo_GTT-	UNBOUND
chr16_21_tRNAGln_CTG+	UNBOUND
chr3_3_tRNAAsp_GTC-	UNBOUND
chr6_133_tRNAVal_CAC-	UNBOUND
chr1_122_tRNAAsn_GTT-	UNBOUND
chr6_86_Pseudo_TAC-	UNBOUND
chr1_53_Pseudo_???+	UNBOUND
chr8_8_tRNAUndet_???+	UNBOUND
chr15_5_Pseudo_GTA-	UNBOUND
AluSg_SINE_Alu	UNBOUND
chr1_10_tRNAAsn_GTT+	UNBOUND
chr1_24_tRNAAsn_GTT+	UNBOUND
AluSx_SINE_55294966	UNBOUND
chr19_9_Pseudo_TTT-	UNBOUND
chr8_7_Pseudo_CTC+	UNBOUND
chr9_3_tRNATrp_CCA_I+	UNBOUND
chr7_10_tRNACys_GCA+	UNBOUND
AluY_SINE_Alu_19904648	UNBOUND
chr1_1_Pseudo_CAC+	UNBOUND
chr2_12_Pseudo_CTC+	UNBOUND
chr6_82_tRNAGly_GCC+	UNBOUND
chr20_3_Pseudo_CAC+	UNBOUND
chr16_14_tRNAGln_TTG+	UNBOUND
chr5_20_tRNALeu_CAG-	UNBOUND
chr19_11_Pseudo_???-	UNBOUND
chr1_87_tRNAAla_AGC-	UNBOUND
chr6_111_Pseudo_AGC-	UNBOUND
chr2_14_tRNATyr_ATA_I+	UNBOUND
chr11_18_tRNAAla_TGC-	UNBOUND
chr6_85_Pseudo_TTC-	UNBOUND
5S_rRNA-related_10	UNBOUND
chr2_9_Pseudo_TAA+	UNBOUND
chr4_2_tRNALeu_TAA-	UNBOUND
chr1_96_Pseudo_CCT-	UNBOUND
chr14_15_Pseudo_TAG-	UNBOUND
AluY_SINE_Alu_118157931	UNBOUND
chrX_1_Pseudo_TTG+	UNBOUND
chr1_109_Pseudo_GTT-	UNBOUND
chr19_3_tRNALys_TTT+	UNBOUND
chr2_4_tRNALeu_AAG+	UNBOUND
AluSg/x_SINE_Alu_42443389	UNBOUND
chr1_31_tRNAGlu_TTC+	UNBOUND
chr1_63_tRNAVal_AAC-	UNBOUND
chrX_2_tRNALeu_TAA-	UNBOUND
chr1_48_tRNAAsp_GTC+	UNBOUND
chrX_3_Pseudo_CTC-	UNBOUND
chr2_11_Pseudo_TTG+	UNBOUND
chr14_11_Pseudo_CTA-	UNBOUND
chr8_14_Pseudo_TTG-	UNBOUND
chr7_26_Pseudo_TTG-	UNBOUND
chr9_5_tRNAGln_CTG-	UNBOUND
chr8_13_Pseudo_TAA-	UNBOUND
chr1_49_tRNAGlu_TTC+	UNBOUND
chr6_88_Pseudo_GAA-	UNBOUND
chr1_128_Pseudo_CTG-	UNBOUND
chr7_9_tRNATyr_GTA+	UNBOUND
AluY_SINE_Alu_39162319	UNBOUND
chr17_24_tRNAThr_AGT-	UNBOUND
chr17_22_tRNAUndet_???-	UNBOUND
chr9_6_tRNAAsp_GTC-	UNBOUND
chr12_14_Pseudo_CTC-	UNBOUND
chr1_13_tRNAAsn_GTT+	UNBOUND
chr16_4_tRNAPro_AGG_I+	UNBOUND
chr6_39_Pseudo_AAT+	UNBOUND
chr18_1_tRNAGlu_CTC+	UNBOUND
chr2_28_Pseudo_TTG-	UNBOUND
chr2_7_Pseudo_AGG+	UNBOUND
chr1_134_tRNAAsn_GTT-	UNBOUND
chr13_2_Pseudo_CTC-	UNBOUND
chr1_17_Pseudo_TTC+	UNBOUND
chr2_6_tRNAGlu_TTC+	UNBOUND
chr5_22_tRNAAsp_GTC-	UNBOUND
chr14_12_Pseudo_TTT-	UNBOUND
chr16_5_tRNALys_CTT+	UNBOUND
chr1_60_Pseudo_TAA-	UNBOUND
chr2_8_Pseudo_AGG+	UNBOUND
chr6_79_tRNAGln_TTG+	UNBOUND
chr5_1_Pseudo_ACA_I+	UNBOUND
chr2_22_Pseudo_TTG-	UNBOUND
chr2_23_tRNAGln_TTG-	UNBOUND
PTPRM	UNBOUND
chr2_21_tRNASer_TGA-	UNBOUND
chr5_23_Pseudo_TTG-	UNBOUND
chr8_9_Pseudo_GAA-	UNBOUND
5S_rRNA-related_7	UNBOUND
chr17_32_Pseudo_TGA-	UNBOUND
chr20_4_Pseudo_TAA-	UNBOUND
chr18_3_Pseudo_TCC+	UNBOUND
chr11_2_tRNALys_CTT+	UNBOUND
chrY_1_Pseudo_TTG-	UNBOUND
OTHER5	UNSTABLE
chr6_3_tRNAArg_TCG+	UNSTABLE
chr6_15_tRNATyr_GTA_I+	UNSTABLE
chr6_163_tRNAIle_AAT-	UNSTABLE
chr6_33_tRNAHis_GTG+	UNSTABLE
chr6_34_tRNAThr_AGT+	UNSTABLE
chr6_153_tRNAIle_AAT-	UNSTABLE
chr6_150_tRNAMet_CAT-	UNSTABLE
chr6_149_tRNALys_TTT-	UNSTABLE
chr6_47_tRNASer_AGA+	UNSTABLE
chr6_143_tRNALys_TTT-	UNSTABLE
chr6_55_tRNAIle_TAT_I+	UNSTABLE
chr6_139_tRNAVal_AAC-	UNSTABLE
chr6_135_tRNAThr_AGT-	UNSTABLE
chr6_60_tRNAThr_AGT+	UNSTABLE
chr6_127_tRNAThr_TGT-	UNSTABLE
chr6_65_tRNAAla_AGC+	UNSTABLE
chr6_68_tRNAAla_AGC+	UNSTABLE
chr6_115_tRNAVal_AAC-	UNSTABLE
chr6_105_tRNAAla_AGC-	UNSTABLE
chr6_104_tRNAAla_TGC-	UNSTABLE
chr6_103_tRNAPhe_GAA-	UNSTABLE
chr6_98_tRNALeu_AAG-	UNSTABLE
AluY_SINE_Alu_80572362	UNSTABLE
chr16_10_tRNALys_CTT+	UNSTABLE
chr16_12_tRNAArg_CCT+	UNSTABLE
chr1_133_tRNAGlu_TTC-	UNSTABLE
chr1_110_Pseudo_TTC-	UNSTABLE
chr1_84_tRNAGlu_TTC-	UNSTABLE
chr5_19_tRNALeu_AAG-	UNSTABLE
chr5_3_tRNALeu_AAG+	UNSTABLE
chr5_18_tRNAVal_CAC-	UNSTABLE
chr6_156_tRNAArg_ACG-	UNSTABLE
chr6_117_tRNAAla_CGC-	UNSTABLE
chr6_54_tRNAThr_CGT+	UNSTABLE
chr6_109_tRNAPhe_GAA-	UNSTABLE
chr1_2_tRNAGly_CCC+	UNSTABLE
chr5_2_tRNAVal_CAC+	UNSTABLE
chr6_162_tRNAMet_CAT-	UNSTABLE
chr6_110_tRNAAla_TGC-	UNSTABLE
chr14_16_tRNATyr_GTA_I-	UNSTABLE
chr1_28_tRNAGln_CTG+	UNSTABLE
chr6_170_tRNATrp_CCA-	UNSTABLE
chr6_12_tRNAPro_AGG+	UNSTABLE
chr6_24_tRNAAla_AGC+	UNSTABLE
chr6_35_tRNASer_CGA+	UNSTABLE
chr6_36_tRNAArg_ACG+	UNSTABLE
chr6_148_tRNASer_TGA-	UNSTABLE
chr6_51_tRNASer_TGA+	UNSTABLE
chr6_146_tRNAGln_CTG-	UNSTABLE
chr14_22_tRNAPro_AGG-	UNSTABLE
chr14_18_tRNATyr_GTA_I-	UNSTABLE
chr16_30_tRNALys_CTT-	UNSTABLE
chr6_134_tRNALeu_TAA-	UNSTABLE
chr16_8_tRNAPro_TGG+	UNSTABLE
chr6_172_tRNASer_TGA-	UNSTABLE
chr17_40_tRNAThr_AGT-	UNSTABLE
chr5_6_tRNAVal_CAC+	UNSTABLE
chr6_17_tRNATyr_GTA_I+	UNSTABLE
chr14_9_tRNAAla_AGC+	UNSTABLE
OTHER2_RP3TR2	UNSTABLE
chr6_27_tRNAMet_CAT+	UNSTABLE
chr16_11_tRNAPro_AGG+	UNSTABLE
chr6_71_tRNALys_TTT+	UNSTABLE
chr6_113_tRNAAla_TGC-	UNSTABLE
chr6_107_tRNAAla_TGC-	UNSTABLE
chr6_151_tRNAThr_CGT-	UNSTABLE
chr6_22_tRNAAla_AGC+	UNSTABLE
chr16_28_tRNAPro_TGG-	UNSTABLE
FLAM_C_SINE_Alu	UNSTABLE
chr6_161_tRNAAla_AGC-	UNSTABLE
chr6_69_tRNAThr_AGT+	UNSTABLE
chr11_3_tRNAArg_TCT_I+	UNSTABLE
chr5_5_tRNAVal_AAC+	UNSTABLE
chr6_121_tRNAThr_CGT-	UNSTABLE
chr11_16_tRNAVal_TAC-	UNSTABLE
chr1_27_Pseudo_CTG+	UNSTABLE
chr6_145_tRNASer_AGA-	UNSTABLE
chr16_6_tRNAPro_CGG+	UNSTABLE
chr6_13_tRNALys_CTT+	UNSTABLE
chr1_107_tRNAAsn_GTT-	UNSTABLE
tRNA-Tyr-TAC_tRNA_tRNA	UNSTABLE
chr6_123_tRNASer_GCT-	UNSTABLE
chr6_114_tRNAArg_CCG-	UNSTABLE
chr1_108_tRNAAsn_GTT-	UNSTABLE
chr1_15_tRNAGln_CTG+	UNSTABLE
chr1_19_tRNAGln_CTG+	UNSTABLE
AluSq_SINE_Alu_150849456	UNSTABLE
chr6_174_tRNAGln_TTG-	UNSTABLE
chr6_21_tRNAMet_CAT+	UNSTABLE
chr6_141_tRNALeu_CAA_I-	UNSTABLE
chr6_61_tRNAMet_CAT+	UNSTABLE
chr6_66_tRNAAla_TGC+	UNSTABLE
AluSx_SINE_Alu_50595434	UNSTABLE
chr14_19_tRNATyr_GTA_I-	UNSTABLE
chr6_31_tRNASer_GCT+	UNSTABLE
chr15_1_tRNAHis_GTG+	UNSTABLE
chr6_164_tRNAMet_CAT-	UNSTABLE
chr6_46_tRNASer_AGA+	UNSTABLE
chr6_108_tRNAAla_AGC-	UNSTABLE
chr6_168_tRNATrp_CCA-	UNSTABLE
chr6_63_tRNAIle_TAT_I+	UNSTABLE
chr6_75_tRNAMet_CAT+	UNSTABLE
chr16_7_tRNALys_CTT+	UNSTABLE
chr6_155_tRNALeu_TAA-	UNSTABLE
chr17_4_tRNAArg_TCT_I+	UNSTABLE
chr1_83_tRNAAsn_GTT-	UNSTABLE
chr6_57_tRNAIle_AAT+	UNSTABLE
chr14_20_tRNAThr_TGT-	UNSTABLE
chr1_4_tRNAGly_CCC+	UNSTABLE
chr1_89_tRNAAsn_GTT-	UNSTABLE
chr14_3_tRNAPro_TGG+	UNSTABLE
chr6_16_tRNATyr_GTA_I+	UNSTABLE
chr6_40_tRNAVal_TAC+	UNSTABLE
chr13_4_tRNAGlu_CTC-	UNSTABLE
chr6_144_tRNAAsp_GTC-	UNSTABLE
chr5_16_tRNALeu_AAG-	UNSTABLE
chr5_9_tRNALys_CTT+	UNSTABLE
chr6_1_tRNAGln_CTG+	UNSTABLE
chr6_160_tRNAAla_AGC-	UNSTABLE
chr6_44_tRNASer_AGA+	UNSTABLE
chr6_147_tRNASer_AGA-	UNSTABLE
chr6_94_tRNAAla_AGC-	UNSTABLE
chr7_25_tRNACys_GCA-	UNSTABLE
chr11_17_tRNAVal_TAC-	UNSTABLE
chr17_37_tRNAPro_CGG-	UNSTABLE
chr17_29_tRNACys_GCA-	UNSTABLE
chr1_5_tRNAGlu_TTC+	UNSTABLE
chr11_13_tRNAPhe_GAA-	UNSTABLE
chr6_175_tRNASer_GCT-	UNSTABLE
chr6_42_tRNAGln_CTG+	UNSTABLE
chr6_19_tRNAAla_AGC+	UNSTABLE
chr1_135_tRNAAsn_GTT-	UNSTABLE
chr6_91_tRNAAla_AGC-	UNSTABLE
chr6_154_tRNAIle_AAT-	UNSTABLE
chr1_112_tRNAGln_CTG-	UNSTABLE
chr5_17_Pseudo_AAG-	UNSTABLE
chr1_37_tRNAGly_GCC+	UNSTABLE
chr1_41_tRNAGly_GCC+	UNSTABLE
chr6_23_tRNAAla_AGC+	UNSTABLE
AluSp_SINE_Alu_87551831	UNSTABLE
chr6_25_tRNAAla_AGC+	UNSTABLE
chr1_23_Pseudo_CTG+	UNSTABLE
chr1_77_tRNAGlu_CTC-	UNSTABLE
chr1_71_tRNAGlu_CTC-	UNSTABLE
chr6_43_tRNASer_GCT+	UNSTABLE
chr5_7_tRNALeu_AAG+	UNSTABLE
chr6_131_tRNAGln_CTG-	UNSTABLE
chr6_140_tRNALeu_CAA_I-	UNSTABLE
chr6_67_tRNAAla_AGC+	UNSTABLE
chr16_13_Pseudo_CTT+	UNSTABLE
chr1_25_tRNAAsn_GTT+	UNSTABLE
chr4_3_tRNACys_GCA-	UNSTABLE
chr6_64_tRNAGln_TTG+	UNSTABLE
chr16_29_tRNAPro_AGG-	UNSTABLE
chr17_41_tRNASer_CGA-	UNSTABLE
chr1_33_Pseudo_???+	UNSTABLE
chr16_9_tRNAPro_AGG+	UNSTABLE
chr7_17_tRNACys_GCA-	UNSTABLE
chr6_52_tRNAArg_TCT_I+	UNSTABLE
chr1_26_tRNAAsn_GTT+	UNSTABLE
chr16_20_tRNAMet_CAT+	UNSTABLE
OTHER1_RP3TR1	UNSTABLE
chr17_18_tRNAArg_CCT+	UNSTABLE
chr6_118_Pseudo_TTT-	UNSTABLE
chr1_126_tRNACys_GCA-	UNSTABLE
chr19_10_tRNAIle_TAT_I-	UNSTABLE
chr3_6_tRNACys_GCA-	UNSTABLE
chr1_35_tRNAGly_GCC+	UNSTABLE
chr1_39_tRNAGly_GCC+	UNSTABLE
RN5S_9	UNSTABLE
RN5S_10	UNSTABLE
chr1_59_tRNAGlu_CTC+	UNSTABLE
chr6_72_tRNAPhe_GAA+	UNSTABLE
chr6_93_tRNAAla_AGC-	UNSTABLE
chr14_23_tRNAPro_AGG-	UNSTABLE
chr9_2_tRNAArg_TCG+	UNSTABLE
chr6_29_tRNAIle_TAT_I+	UNSTABLE
chr1_130_tRNAGly_CCC-	UNSTABLE
chr11_15_tRNAPhe_GAA-	UNSTABLE
chr6_53_tRNALys_TTT+	UNSTABLE
chr16_19_tRNAGly_GCC+	UNSTABLE
chr6_142_tRNAMet_CAT-	UNSTABLE
chr1_111_tRNAHis_GTG-	UNSTABLE
chr1_131_Pseudo_CAC-	UNSTABLE
chr6_102_tRNAAla_AGC-	UNSTABLE
chr1_80_tRNAGlu_CTC-	UNSTABLE
chr1_74_tRNAGlu_CTC-	UNSTABLE
chr1_34_tRNALeu_CAG+	UNSTABLE
chr1_38_tRNALeu_CAG+	UNSTABLE
5S_rRNA-related_1	UNSTABLE
5S_rRNA-related_2	UNSTABLE
5S_rRNA-related_3	UNSTABLE
5S_rRNA-related_4	UNSTABLE
5S_rRNA-related_5	UNSTABLE
5S_rRNA-related_6	UNSTABLE
RN5S_1	UNSTABLE
RN5S_2	UNSTABLE
RN5S_4	UNSTABLE
RN5S_5	UNSTABLE
RN5S_6	UNSTABLE
RN5S_7	UNSTABLE
RN5S_11	UNSTABLE
chr6_6_tRNAArg_ACG+	UNSTABLE
chr6_50_tRNASer_AGA+	UNSTABLE
chr6_126_tRNALeu_AAG-	UNSTABLE
chr7_22_tRNACys_GCA-	UNSTABLE
chr11_11_tRNALys_TTT+	UNSTABLE
chr12_13_tRNAAla_TGC-	UNSTABLE
chr1_36_tRNALeu_CAG+	UNSTABLE
chr1_40_tRNALeu_CAG+	UNSTABLE
chr1_42_tRNALeu_CAG+	UNSTABLE
RN5S_8	UNSTABLE
chr2_1_Pseudo_CCC+	UNSTABLE
chr14_21_tRNAThr_TGT-	UNSTABLE
chr1_132_tRNAGly_CCC-	UNSTABLE
chr6_138_tRNAArg_ACG-	UNSTABLE
chr17_21_tRNAArg_CCT-	UNSTABLE
chr6_152_tRNAVal_CAC-	UNSTABLE
chr6_106_tRNAPhe_GAA-	UNSTABLE
chr16_3_tRNAPro_TGG+	UNSTABLE
chr1_43_tRNAGly_GCC+	UNSTABLE
chr6_37_tRNAVal_AAC+	UNSTABLE
chr17_13_tRNAGly_CCC+	UNSTABLE
chr6_169_tRNAMet_CAT-	UNSTABLE
chr6_30_tRNAPro_CGG+	UNSTABLE
chr6_59_tRNAIle_AAT+	UNSTABLE
chr1_21_tRNAHis_GTG+	UNSTABLE
chr15_11_tRNAGlu_TTC-	UNSTABLE
chr16_2_tRNAArg_CCT+	UNSTABLE
chr1_103_tRNAAsn_GTT-	UNSTABLE
chr6_119_tRNAAla_CGC-	UNSTABLE
chr5_4_tRNAVal_AAC+	UNSTABLE
chr6_5_tRNASer_AGA+	UNSTABLE
chr7_13_tRNACys_GCA+	UNSTABLE
chr12_12_tRNAAsp_GTC-	UNSTABLE
chr6_171_tRNAMet_CAT-	UNSTABLE
chr6_89_tRNAAla_AGC-	UNSTABLE
VTRNA1-3	UNSTABLE
chr17_28_tRNACys_GCA-	UNSTABLE
chr6_62_tRNASer_GCT+	UNSTABLE
MIRb_SINE_MIR_75003721	UNSTABLE
chr9_4_tRNAArg_TCT_I-	UNSTABLE
MIR_SINE_MIR_25183668	UNSTABLE
chr1_82_tRNAGly_TCC-	UNSTABLE
chr1_120_tRNAGln_CTG-	UNSTABLE
chr6_124_tRNAArg_TCG-	UNSTABLE
AluJo_SINE_Alu	UNSTABLE
chr6_132_tRNAVal_AAC-	UNSTABLE
MIRb_SINE_MIR_9136662	UNSTABLE
chr16_32_tRNALys_CTT-	UNSTABLE
chr17_39_tRNATrp_CCA-	UNSTABLE
RNaseP_RNA	UNSTABLE
chr1_16_tRNAHis_GTG+	UNSTABLE
chr7_5_tRNACys_GCA+	UNSTABLE
chr1_86_tRNAArg_TCT-	UNSTABLE
chr17_35_tRNASer_AGA-	UNSTABLE
chr6_41_Pseudo_ACT+	UNSTABLE
RN5S_3	UNSTABLE
chr12_11_tRNAPhe_GAA-	UNSTABLE
chr1_7_tRNAAsn_GTT+	UNSTABLE
chr16_23_tRNALys_TTT-	UNSTABLE
chr1_76_tRNAGly_TCC-	UNSTABLE
chr1_70_tRNAGly_TCC-	UNSTABLE
chr7_16_tRNACys_GCA-	UNSTABLE
chr1_78_tRNAAsp_GTC-	UNSTABLE
chr1_75_tRNAAsp_GTC-	UNSTABLE
chr1_72_tRNAAsp_GTC-	UNSTABLE
SNAR-A3-A11_SNAR-A14_3	UNSTABLE
SNAR-A3-A11_SNAR-A14_4	UNSTABLE
chr1_98_tRNAVal_CAC-	UNSTABLE
SNAR-A3-A11_SNAR-A14_5	UNSTABLE
chr20_1_tRNAGln_CTG+	UNSTABLE
chr6_96_tRNAPhe_GAA-	UNSTABLE
chr1_69_tRNAAsp_GTC-	UNSTABLE
HUERS-P1_LTR_ERV1	UNSTABLE
SNAR-A3-A11_SNAR-A14_2	UNSTABLE
chr5_11_tRNALys_CTT-	UNSTABLE
MIRb_SINE_MIR_146808377	UNSTABLE
chr21_2_tRNAGly_GCC-	UNSTABLE
chr17_5_tRNAGly_GCC+	UNSTABLE
chr14_4_tRNAThr_TGT+	UNSTABLE
SNAR-A3-A11_SNAR-A14_8	UNSTABLE
chr6_159_tRNAAla_AGC-	UNSTABLE
SNAR-A3-A11_SNAR-A14_6	UNSTABLE
SNAR-A3-A11_SNAR-A14_7	UNSTABLE
chr6_20_tRNAAla_AGC+	UNSTABLE
chr1_56_tRNAThr_TGT+	UNSTABLE
SNAR-A3-A11_SNAR-A14_10	UNSTABLE
chr6_101_tRNAAla_AGC-	UNSTABLE
SNAR-A1_SNAR-A2_1	UNSTABLE
SNAR-A3-A11_SNAR-A14_9	UNSTABLE
chr6_157_tRNAVal_CAC-	UNSTABLE
chr8_5_tRNATyr_GTA_I+	UNSTABLE
chr12_6_tRNATrp_CCA+	UNSTABLE
chr14_5_tRNATyr_GTA_I+	UNSTABLE
chr16_22_tRNAMet_CAT-	UNSTABLE
chr1_3_Pseudo_CAC+	UNSTABLE
SNAR-A1_SNAR-A2_2	UNSTABLE
chr1_47_tRNAAsn_GTT+	UNSTABLE
chr5_10_tRNAVal_CAC-	UNSTABLE
chr1_79_tRNAGly_TCC-	UNSTABLE
chr1_73_tRNAGly_TCC-	UNSTABLE
chr15_3_tRNACys_GCA+	UNSTABLE
chr6_48_tRNAAsp_GTC+	UNSTABLE
chr7_15_tRNACys_GCA+	UNSTABLE
chr6_173_tRNAGln_TTG-	UNSTABLE
chr6_77_tRNAGlu_CTC+	UNSTABLE
chr17_34_tRNAIle_AAT-	UNSTABLE
MER41B-int_LTR_ERV1	UNSTABLE
chr16_1_tRNAArg_CCG+	UNSTABLE
chr6_80_tRNAIle_AAT+	UNSTABLE
SNAR-A3-A11_SNAR-A14_1	UNSTABLE
chr19_8_tRNASeC(e)_TCA-	UNSTABLE
chr11_4_tRNALeu_TAA+	UNSTABLE
chr7_23_tRNACys_GCA-	UNSTABLE
chr16_33_Pseudo_AGG-	UNSTABLE
U6-1	UNSTABLE
chr6_76_tRNALys_TTT+	UNSTABLE
SNAR-A12_SNAR-A13_1	UNSTABLE
chr16_34_tRNAGly_CCC-	UNSTABLE
chr14_8_tRNACys_GCA+	UNSTABLE
chr1_44_Pseudo_GTC+	UNSTABLE
chr6_49_tRNAGln_CTG+	UNSTABLE
chr15_9_tRNAHis_GTG-	UNSTABLE
chr17_36_tRNAThr_AGT-	UNSTABLE
chr6_4_tRNAArg_TCG+	UNSTABLE
chr6_125_tRNAThr_CGT-	UNSTABLE
chr13_3_tRNAGlu_TTC-	UNSTABLE
chr6_70_tRNAAla_CGC+	UNSTABLE
chr1_85_tRNAVal_CAC-	UNSTABLE
RN7SL1	UNSTABLE
chr6_45_tRNAAsp_GTC+	UNSTABLE
chr1_81_tRNAAsp_GTC-	UNSTABLE
chr6_158_tRNAIle_AAT-	UNSTABLE
chr11_5_tRNALys_TTT+	UNSTABLE
chr17_8_tRNAThr_AGT+	UNSTABLE
chr6_10_tRNAAla_CGC+	UNSTABLE
chr15_8_tRNAHis_GTG-	UNSTABLE
chr6_167_tRNAThr_AGT-	UNSTABLE
chr6_8_tRNAArg_ACG+	UNSTABLE
chr5_12_tRNAVal_AAC-	UNSTABLE
chr7_14_tRNACys_GCA+	UNSTABLE
tRNA-derived	UNSTABLE
VTRNA1-1	UNSTABLE
chr6_90_tRNAAla_AGC-	UNSTABLE
chr6_95_tRNAAla_AGC-	UNSTABLE
chr1_66_tRNALeu_CAA-	UNSTABLE
chr17_42_tRNALeu_TAG-	UNSTABLE
PDS5B_Intronic_AluSx	UNSTABLE
MIR_SINE_MIR_103806446	UNSTABLE
chr6_9_tRNAVal_CAC+	UNSTABLE
chr7_6_tRNACys_GCA+	UNSTABLE
chr14_10_tRNAIle_AAT+	UNSTABLE
chr17_7_tRNASer_GCT+	UNSTABLE
chr1_119_tRNALys_CTT-	UNSTABLE
chr17_6_tRNATrp_CCA+	UNSTABLE
chr14_2_tRNALeu_TAG+	UNSTABLE
chr13_5_tRNAGlu_TTC-	UNSTABLE
chr1_90_tRNAVal_CAC-	UNSTABLE
GABRB1_Intronic(AluSp)	UNSTABLE
chr5_14_tRNAPro_TGG-	UNSTABLE
chr12_5_tRNAAsp_GTC+	UNSTABLE
chr6_11_tRNAIle_AAT+	UNSTABLE
chr1_118_tRNAHis_GTG-	UNSTABLE
chr11_14_tRNALys_TTT-	UNSTABLE
chr17_10_tRNAGly_TCC+	UNSTABLE
5S_rRNA-related_9	UNSTABLE
HVG2_hsa-mir-886	UNSTABLE
chr1_116_tRNAGlu_CTC-	UNSTABLE
chr8_4_tRNATyr_GTA_I+	UNSTABLE
chr5_13_tRNAThr_TGT-	UNSTABLE
chr12_10_tRNAAsp_GTC-	UNSTABLE
chr15_2_tRNALys_CTT+	UNSTABLE
chr16_26_tRNALeu_CAG-	UNSTABLE
RN7SL2	UNSTABLE
chr6_78_tRNALeu_AAG+	UNSTABLE
chr1_129_tRNAVal_CAC-	UNSTABLE
chr1_9_tRNAArg_TCT_I+	UNSTABLE
chr19_2_tRNAGly_TCC+	UNSTABLE
chr8_10_tRNAMet_CAT-	UNSTABLE
chr1_99_tRNAVal_CAC-	UNSTABLE
chr12_8_tRNAAla_TGC+	UNSTABLE
RN7SL3	UNSTABLE
chr19_14_tRNAPhe_GAA-	UNSTABLE
LNX1_Intronic(Alu_FLAM_C)	UNSTABLE
chr6_100_tRNALeu_CAA_I-	UNSTABLE
chr13_1_tRNAPhe_GAA-	UNSTABLE
chr9_7_tRNAHis_GTG-	UNSTABLE
chr10_4_tRNAAsn_GTT-	UNSTABLE
chr16_15_tRNAThr_CGT+	UNSTABLE
hY5_RNA	UNSTABLE
chr17_15_tRNACys_GCA+	UNSTABLE
chr14_1_tRNALeu_AAG+	UNSTABLE
chr11_9_tRNAPro_AGG+	UNSTABLE
chr15_7_tRNAGln_CTG-	UNSTABLE
chr6_137_tRNASer_CGA-	UNSTABLE
chr2_27_tRNAGly_CCC-	UNSTABLE
chr6_120_tRNAAla_AGC-	UNSTABLE
chr19_1_tRNAAsn_GTT+	UNSTABLE
chr6_83_tRNALeu_TAA+	UNSTABLE
chr17_38_tRNAAsp_GTC-	UNSTABLE
MER50_LTR_ERV1	UNSTABLE
chr7_2_tRNAPro_AGG+	UNSTABLE
chr6_14_tRNATyr_GTA_I+	UNSTABLE
chr1_91_Pseudo_CCC-	UNSTABLE
chr6_166_tRNAAla_AGC-	UNSTABLE
chr1_97_tRNAAsn_GTT-	UNSTABLE
chr19_4_tRNAThr_AGT+	UNSTABLE
chr11_8_tRNASer_GCT+	UNSTABLE
chr3_2_tRNAVal_AAC+	UNSTABLE
chr14_13_tRNALys_CTT-	UNSTABLE
chr1_32_tRNAMet_CAT+	UNSTABLE
chr1_45_tRNAGly_TCC+	UNSTABLE
chr6_73_tRNAArg_CCG+	UNSTABLE
U6-8	UNSTABLE
chr17_23_tRNAArg_CCG-	UNSTABLE
chr16_17_tRNALeu_CAG+	UNSTABLE
chr6_74_tRNALeu_CAA_I+	UNSTABLE
chr15_4_tRNAArg_TCG+	UNSTABLE
chr1_58_tRNALeu_CAA_I+	UNSTABLE
chr17_20_tRNAMet_CAT-	UNSTABLE
chr6_99_tRNAGln_CTG-	UNSTABLE
chr2_5_tRNAIle_TAT_I+	UNSTABLE
chr6_97_tRNAMet_CAT-	UNSTABLE
chr17_3_tRNAGln_CTG+	UNSTABLE
chr17_26_tRNACys_GCA-	UNSTABLE
chr17_27_tRNACys_GCA-	UNSTABLE
chr10_6_tRNAVal_TAC-	UNSTABLE
hY3_RNA	UNSTABLE
chr14_6_tRNAPro_TGG+	UNSTABLE
chr1_67_tRNALeu_CAG-	UNSTABLE
chr5_15_tRNAVal_AAC-	UNSTABLE
RNU6ATAC	UNSTABLE
POLR3E_Intronic_MIR_repeat	UNSTABLE
chr17_9_tRNAIle_AAT+	UNSTABLE
chr6_130_tRNAGln_TTG-	UNSTABLE
chr2_3_tRNAAla_AGC+	UNSTABLE
hY1_RNA	UNSTABLE
chr17_12_tRNATrp_CCA+	UNSTABLE
chr16_24_tRNAGly_GCC-	STABLE
chr2_2_tRNATyr_GTA_I+	STABLE
RNaseMRP_RNA	STABLE
chr17_19_tRNAArg_TCG+	STABLE
chr1_52_tRNAPro_CGG+	STABLE
RUNDC2C_Intronic_AluSg	STABLE
chr16_16_tRNALeu_AAG+	STABLE
chr3_7_tRNACys_GCA-	STABLE
chr5_8_tRNAAla_TGC+	STABLE
chr12_2_tRNASer_CGA+	STABLE
chr13_7_tRNAAsn_GTT-	STABLE
chr1_117_tRNAGly_TCC-	STABLE
chr17_16_tRNAGln_TTG+	STABLE
chr6_2_tRNAMet_CAT+	STABLE
7SK_RNA	STABLE
U6-9	STABLE
U6-2	STABLE
chrX_4_tRNAVal_TAC-	STABLE
chr11_12_tRNAPro_TGG-	STABLE
U6-7	STABLE
AluJb_SINE_Alu_17863453	STABLE
chr2_20_tRNAGlu_TTC-	STABLE
chr19_13_tRNAVal_CAC-	STABLE
chr10_2_tRNASer_TGA+	STABLE
chr1_65_tRNAPro_AGG-	STABLE
chr16_25_tRNAGly_GCC-	STABLE
chr8_11_tRNASer_AGA-	STABLE
chr6_7_tRNALeu_CAG+	STABLE
chr17_14_tRNAThr_CGT+	STABLE
chr8_6_tRNAAla_AGC+	STABLE
chr7_3_tRNAArg_CCT+	STABLE
VTRNA1-2	STABLE
chr3_11_tRNAArg_ACG-	STABLE
chr14_7_tRNAArg_ACG+	STABLE
chr1_54_tRNALys_TTT+	STABLE
chr2_13_tRNAAla_CGC+	STABLE
chr6_129_tRNAMet_CAT-	STABLE
chr12_4_tRNAAsp_GTC+	STABLE
hY4_RNA	STABLE
chr16_27_tRNALeu_TAG-	STABLE
chr1_68_tRNAGly_GCC-	STABLE
chr6_87_tRNAGlu_CTC-	STABLE
chr1_62_tRNALys_TTT-	STABLE
TOM1L2_Intronic	STABLE
chr2_19_tRNAGly_GCC-	STABLE
chr17_2_tRNALys_TTT+	STABLE
chr15_10_tRNASer_GCT-	STABLE
chr17_31_tRNAAsn_GTT-	STABLE
chr6_128_tRNAGly_GCC-	STABLE

## Sheet: MAF1 siRNA POLR3D ChIP-seq
Locus annotation	HUGO nomenclature	Locus position with link in GRCh37/hg19	Chromosome	Gene start	Gene end	Promoter Type	Input #siNEG tag count	POLR3D #siNEG tag count	Input #1siMAF1 tag count	POLR3D #1siMAF1 tag count	Input #2siMAF1 tag count	POLR3D #2siMAF1 tag count	POLR3D #siNEG score log2 IP/Input#siNEG	O (Occupied, > cut off) NO (Not occupied, < cut off) cut off = 1.1118	POLR3D #si1MAF1 score log2 IP/Input#1siMAF1	O (Occupied, > cut off) NO (Not occupied, < cut off) cut off = 1.1955	POLR3D #2siMAF1 score log2 IP/Input#2siMAF1	O (Occupied, > cut off) NO (Not occupied, < cut off) cut off = 1.0238
chr1_136_Pseudo_???-	TRU-NNN4-1	chr1:7990339-7990408	chr1	7990339	7990408	II	49	36	53	30	40	31	-0.259387	NO	-0.468149	NO	-0.198546	NO
chr1_135_tRNAAsn_GTT-	TRN-GTT5-1	chr1:16847080-16847153	chr1	16847080	16847153	II	71	167	77	549	56	407	0.96384	NO	2.43595	O	2.34522	O
chr1_134_tRNAAsn_GTT-	TRN-GTT18-1	chr1:16858893-16858966	chr1	16858893	16858966	II	57	45	49	54	60	51	-0.214125	NO	0.0885367	NO	-0.152003	NO
chr1_133_tRNAGlu_TTC-	TRE-TTC4-1	chr1:16861774-16861845	chr1	16861774	16861845	II	106	1879	105	4705	73	3868	3.81114	O	5.13233	O	5.24202	O
chr1_132_tRNAGly_CCC-	TRG-CCC1-1	chr1:16872434-16872504	chr1	16872434	16872504	II	53	4166	38	7493	47	7532	5.65976	O	6.78963	O	6.61777	O
chr1_131_Pseudo_CAC-	TRV-CAC11-1	chr1:16874160-16874232	chr1	16874160	16874232	II	38	1536	27	3180	38	2716	4.52541	O	5.81547	O	5.33565	O
chr1_130_tRNAGly_CCC-	TRG-CCC4-1	chr1:17004766-17004836	chr1	17004766	17004836	II	27	2973	28	5462	30	5572	5.7193	O	6.56513	O	6.54484	O
chr1_129_tRNAVal_CAC-	TRV-CAC10-1	chr1:17006501-17006573	chr1	17006501	17006573	II	29	96	42	209	41	171	1.09464	NO	1.73094	O	1.5013	O
chr1_1_Pseudo_CAC+	TRV-CAC13-1	chr1:17052061-17052133	chr1	17052061	17052133	II	85	102	99	126	94	115	0.198904	NO	0.274175	NO	0.225713	NO
chr1_2_tRNAGly_CCC+	TRG-CCC5-1	chr1:17053780-17053850	chr1	17053780	17053850	II	74	1846	92	4127	80	3958	4.173	O	5.09059	O	5.18009	O
chr1_128_Pseudo_CTG-	TRQ-CTG14-1	chr1:17180900-17180971	chr1	17180900	17180971	II	39	33	42	52	49	44	-0.131245	NO	0.187627	NO	-0.0943274	NO
chr1_3_Pseudo_CAC+	TRV-CAC11-2	chr1:17186693-17186765	chr1	17186693	17186765	II	44	2025	54	4853	57	4306	4.79547	O	5.86123	O	5.63921	O
chr1_4_tRNAGly_CCC+	TRG-CCC1-2	chr1:17188416-17188486	chr1	17188416	17188486	II	69	2636	74	5414	65	5523	4.7511	O	5.71001	O	5.8692	O
chr1_5_tRNAGlu_TTC+	TRE-TTC3-1	chr1:17199078-17199149	chr1	17199078	17199149	II	112	2899	115	7299	60	5838	4.36645	O	5.65949	O	6.0268	O
chr1_6_tRNAAsn_GTT+	TRN-GTT13-1	chr1:17201958-17202031	chr1	17201958	17202031	II	94	61	108	79	107	69	-0.446402	NO	-0.34034	NO	-0.468675	NO
chr1_7_tRNAAsn_GTT+	TRN-GTT4-1	chr1:17216172-17216245	chr1	17216172	17216245	II	43	159	41	277	49	264	1.37242	O	2.11235	O	1.89589	O
chr1_8_Pseudo_CTT+	TRK-CTT12-1	chr1:39970195-39970267	chr1	39970195	39970267	II	67	54	79	80	80	62	-0.207595	NO	0.0131754	NO	-0.257798	NO
chr1_127_tRNALys_CTT-	TRK-CTT7-1	chr1:55423542-55423614	chr1	55423542	55423614	II	23	25	33	38	12	36	0.0534393	NO	0.110183	NO	0.652077	NO
chr1_126_tRNACys_GCA-	TRC-GCA7-1	chr1:93981834-93981906	chr1	93981834	93981906	II	32	302	32	560	41	788	2.42084	O	3.25037	O	3.52621	O
chr1_9_tRNAArg_TCT_I+	TRR-TCT1-1	chr1:94313129-94313213	chr1	94313129	94313213	II	89	8398	92	12363	64	8843	6.14616	O	6.6665	O	6.56062	O
chr1_125_Pseudo_???-	TRU-NNN8-1	chr1:108496275-108496345	chr1	108496275	108496345	II	31	28	41	44	28	42	-0.0727563	NO	0.0597062	NO	0.311944	NO
chr1_124_Pseudo_GTT-	TRN-GTT21-1	chr1:143663558-143663631	chr1	143663558	143663631	II	17	12	23	15	11	16	-0.162271	NO	-0.236067	NO	0.16601	NO
chr1_10_tRNAAsn_GTT+	TRN-GTT16-1	chr1:143690028-143690101	chr1	143690028	143690101	II	20	10	28	12	20	14	-0.321928	NO	-0.465664	NO	-0.184425	NO
chr1_11_tRNAAsn_GTT+	TRN-GTT11-1	chr1:144301611-144301684	chr1	144301611	144301684	II	10	16	14	15	17	14	0.201634	NO	0.0324215	NO	-0.0951572	NO
chr1_123_tRNAAsn_GTT-	TRN-GTT16-2	chr1:144308614-144308687	chr1	144308614	144308687	II	18	18	23	17	23	19	0	NO	-0.173332	NO	-0.113211	NO
chr1_12_tRNAAsn_GTT+	TRN-GTT14-1	chr1:144481840-144481913	chr1	144481840	144481913	II	21	19	19	22	24	26	-0.0577155	NO	0.0857299	NO	0.0524674	NO
chr1_122_tRNAAsn_GTT-	TRN-GTT16-3	chr1:144488843-144488916	chr1	144488843	144488916	II	21	18	30	20	29	19	-0.0874628	NO	-0.263034	NO	-0.267933	NO
chr1_121_tRNAGln_CTG-	TRQ-CTG8-1	chr1:144839436-144839507	chr1	144839436	144839507	II	68	199	59	427	66	328	1.22449	O	2.36032	O	1.89885	O
chr1_120_tRNAGln_CTG-	TRQ-CTG8-2	chr1:145379320-145379391	chr1	145379320	145379391	II	74	391	70	763	73	646	2.01724	O	2.98732	O	2.71438	O
chr1_13_tRNAAsn_GTT+	TRN-GTT20-1	chr1:145385729-145385804	chr1	145385729	145385804	II	44	34	47	80	30	56	-0.209453	NO	0.514573	NO	0.519374	NO
chr1_119_tRNALys_CTT-	TRK-CTT2-1	chr1:145395522-145395594	chr1	145395522	145395594	II	55	8195	67	11285	52	9307	6.59641	O	6.86604	O	6.83119	O
chr1_118_tRNAHis_GTG-	TRH-GTG1-1	chr1:145396881-145396952	chr1	145396881	145396952	II	85	8333	81	12041	53	9994	6.18431	O	6.76484	O	6.91613	O
chr1_117_tRNAGly_TCC-	TRG-TCC2-1	chr1:145397864-145397935	chr1	145397864	145397935	II	52	5992	33	8534	28	7776	6.19847	O	7.08679	O	7.07239	O
chr1_116_tRNAGlu_CTC-	TRE-CTC1-1	chr1:145399233-145399304	chr1	145399233	145399304	II	48	11656	72	15106	39	11980	7.22709	O	7.21327	O	7.44342	O
chr1_14_Pseudo_CCT+	TRR-CCT6-1	chr1:145941579-145941649	chr1	145941579	145941649	II	12	19	18	17	18	16	0.222392	NO	-0.0303736	NO	-0.0614005	NO
chr1_15_tRNAGln_CTG+	TRQ-CTG3-1	chr1:145963304-145963375	chr1	145963304	145963375	II	62	1979	80	5822	57	5304	4.4487	O	5.73335	O	5.93806	O
chr1_115_tRNAAsn_GTT-	TRN-GTT9-1	chr1:145979034-145979107	chr1	145979034	145979107	II	36	72	47	196	44	123	0.628031	NO	1.55339	O	1.04793	O
chr1_114_tRNAGln_CTG-	TRQ-CTG10-1	chr1:146476760-146476831	chr1	146476760	146476831	II	46	113	51	155	51	170	0.911944	NO	1.19153	NO	1.30401	O
chr1_16_tRNAHis_GTG+	TRH-GTG1-2	chr1:146544773-146544844	chr1	146544773	146544844	II	58	812	66	1964	52	1753	3.25824	O	4.37649	O	4.44254	O
chr1_17_Pseudo_TTC+	TRE-TTC14-1	chr1:146550178-146550249	chr1	146550178	146550249	II	84	44	82	39	58	44	-0.623437	NO	-0.69883	NO	-0.249978	NO
chr1_18_Pseudo_CCT+	TRR-CCT6-2	chr1:147483291-147483361	chr1	147483291	147483361	II	12	19	18	17	18	16	0.222392	NO	-0.0303736	NO	-0.0614005	NO
chr1_19_tRNAGln_CTG+	TRQ-CTG3-2	chr1:147505038-147505109	chr1	147505038	147505109	II	62	1979	80	5822	57	5304	4.4487	O	5.73335	O	5.93806	O
chr1_113_tRNAAsn_GTT-	TRN-GTT9-2	chr1:147520767-147520840	chr1	147520767	147520840	II	36	72	47	196	44	123	0.628031	NO	1.55339	O	1.04793	O
chr1_20_tRNAAsn_ATT+	TRN-ATT1-1	chr1:147719029-147719102	chr1	147719029	147719102	II	93	68	92	55	94	81	-0.327805	NO	-0.521346	NO	-0.15978	NO
chr1_112_tRNAGln_CTG-	TRQ-CTG4-1	chr1:147737382-147737453	chr1	147737382	147737453	II	54	1114	72	2041	51	2068	3.76755	O	4.34369	O	4.69495	O
OTHER5	N/A	chr1:147752681-147752773	chr1	147752681	147752773	other	35	312	30	757	38	626	2.39548	O	3.71333	O	3.27009	O
chr1_21_tRNAHis_GTG+	TRH-GTG1-3	chr1:147753471-147753542	chr1	147753471	147753542	II	82	5190	67	9265	53	9101	5.54248	O	6.58233	O	6.78152	O
chr1_111_tRNAHis_GTG-	TRH-GTG1-4	chr1:147774845-147774916	chr1	147774845	147774916	II	95	5219	75	9299	61	9130	5.39204	O	6.47326	O	6.65334	O
OTHER2_RP3TR2	N/A	chr1:147775601-147775693	chr1	147775601	147775693	other	68	1433	56	3716	53	3200	3.9	O	5.44487	O	5.28228	O
chr1_110_Pseudo_TTC-	TRE-TTC6-1	chr1:147781030-147781101	chr1	147781030	147781101	II	47	313	51	907	48	838	2.15528	O	3.53206	O	3.47615	O
chr1_22_tRNAGln_CTG+	TRQ-CTG7-1	chr1:147800937-147801008	chr1	147800937	147801008	II	71	53	71	117	77	80	-0.283172	NO	0.541461	NO	0.0398927	NO
chr1_23_Pseudo_CTG+	TRQ-CTG9-1	chr1:147825689-147825760	chr1	147825689	147825760	II	37	952	49	2378	41	1996	3.87349	O	4.92984	O	4.83467	O
chr1_109_Pseudo_GTT-	TRN-GTT23-1	chr1:147851060-147851133	chr1	147851060	147851133	II	23	22	32	24	27	17	-0.0274807	NO	-0.199309	NO	-0.278301	NO
chr1_24_tRNAAsn_GTT+	TRN-GTT16-4	chr1:147877537-147877610	chr1	147877537	147877610	II	20	10	28	12	20	14	-0.321928	NO	-0.465664	NO	-0.184425	NO
chr1_25_tRNAAsn_GTT+	TRN-GTT7-1	chr1:148000805-148000878	chr1	148000805	148000878	II	37	3962	62	7472	56	6965	5.89681	O	6.3495	O	6.34584	O
chr1_26_tRNAAsn_GTT+	TRN-GTT2-1	chr1:148248115-148248188	chr1	148248115	148248188	II	70	5412	98	11510	80	9764	5.76607	O	6.49436	O	6.47632	O
chr1_108_tRNAAsn_GTT-	TRN-GTT3-1	chr1:148598314-148598387	chr1	148598314	148598387	II	61	2577	78	5126	74	4919	4.84038	O	5.57715	O	5.57248	O
chr1_107_tRNAAsn_GTT-	TRN-GTT3-2	chr1:148760356-148760429	chr1	148760356	148760429	II	27	1177	34	2538	33	2583	4.40432	O	5.32643	O	5.37421	O
chr1_27_Pseudo_CTG+	TRQ-CTG11-1	chr1:149079364-149079435	chr1	149079364	149079435	II	35	152	67	428	36	421	1.48543	O	2.23929	O	2.77259	O
chr1_106_tRNAHis_GTG-	TRH-GTG2-1	chr1:149155828-149155899	chr1	149155828	149155899	II	34	38	47	39	51	44	0.0874628	NO	-0.158262	NO	-0.130397	NO
chr1_105_Pseudo_TTC-	TRE-TTC7-1	chr1:149161628-149161699	chr1	149161628	149161699	II	48	77	58	84	60	77	0.456065	NO	0.373458	NO	0.249614	NO
chr1_28_tRNAGln_CTG+	TRQ-CTG4-2	chr1:149186125-149186196	chr1	149186125	149186196	II	53	650	42	1572	47	1413	3.03435	O	4.47573	O	4.22807	O
chr1_104_Pseudo_GTT-	TRN-GTT22-1	chr1:149211948-149212021	chr1	149211948	149212021	II	42	48	66	47	42	49	0.115477	NO	-0.318176	NO	0.133856	NO
chr1_103_tRNAAsn_GTT-	TRN-GTT6-1	chr1:149230570-149230643	chr1	149230570	149230643	II	47	362	59	804	36	758	2.34792	O	3.22817	O	3.57766	O
chr1_102_Pseudo_TTC-	TRE-TTC10-1	chr1:149278785-149278857	chr1	149278785	149278857	II	104	155	120	347	68	266	0.465292	NO	1.3296	O	1.59474	O
chr1_101_tRNAAsn_GTT-	TRN-GTT15-1	chr1:149284503-149284576	chr1	149284503	149284576	II	166	119	177	156	156	160	-0.395541	NO	-0.154328	NO	0.0306968	NO
chr1_100_Pseudo_GAA-	TRF-GAA9-1	chr1:149287359-149287430	chr1	149287359	149287430	II	137	200	138	442	114	314	0.461786	NO	1.49033	O	1.25634	O
chr1_99_tRNAVal_CAC-	TRV-CAC8-1	chr1:149294666-149294736	chr1	149294666	149294736	II	43	3766	33	6598	49	6273	5.70044	O	6.71708	O	6.31804	O
chr1_98_tRNAVal_CAC-	TRV-CAC4-1	chr1:149298555-149298627	chr1	149298555	149298627	II	51	4309	43	7593	55	7868	5.7433	O	6.70632	O	6.53788	O
chr1_97_tRNAAsn_GTT-	TRN-GTT12-1	chr1:149326272-149326345	chr1	149326272	149326345	II	40	144	76	338	41	278	1.31366	O	1.79564	O	2.11704	O
chr1_29_tRNAGlu_CTC+	TRE-CTC17-1	chr1:149334272-149334340	chr1	149334272	149334340	II	49	37	47	27	43	39	-0.237692	NO	-0.433897	NO	-0.0813001	NO
chr1_96_Pseudo_CCT-	TRR-CCT7-1	chr1:149343081-149343151	chr1	149343081	149343151	II	26	31	29	26	35	38	0.123382	NO	-0.0752881	NO	0.065095	NO
chr1_30_tRNAAsn_GTT+	TRN-GTT16-5	chr1:149608609-149608682	chr1	149608609	149608682	II	24	19	21	18	23	24	-0.140178	NO	-0.0874628	NO	0.026967	NO
chr1_95_tRNAAsn_GTT-	TRN-GTT11-2	chr1:149615617-149615690	chr1	149615617	149615690	II	16	17	19	18	18	14	0.0310269	NO	-0.0297473	NO	-0.125531	NO
chr1_94_tRNAGlu_TTC-	TRE-TTC8-1	chr1:149664355-149664427	chr1	149664355	149664427	II	97	200	99	389	63	344	0.856805	NO	1.69958	O	2.00774	O
chr1_93_tRNAAsn_GTT-	TRN-GTT19-1	chr1:149670057-149670130	chr1	149670057	149670130	II	58	33	45	61	55	57	-0.482152	NO	0.278976	NO	0.0335526	NO
chr1_92_Pseudo_GAA-	TRF-GAA10-1	chr1:149672905-149672976	chr1	149672905	149672976	II	96	112	97	219	81	161	0.172467	NO	0.971317	NO	0.783013	NO
chr1_91_Pseudo_CCC-	TRG-CCC6-1	chr1:149680210-149680280	chr1	149680210	149680280	II	30	3280	19	5510	33	5279	5.78572	O	6.82096	O	6.39694	O
chr1_90_tRNAVal_CAC-	TRV-CAC5-1	chr1:149684088-149684161	chr1	149684088	149684161	II	76	2445	79	4487	64	4007	4.54529	O	5.37296	O	5.42448	O
chr1_89_tRNAAsn_GTT-	TRN-GTT8-1	chr1:149711798-149711871	chr1	149711798	149711871	II	66	306	81	718	72	615	1.80735	O	2.75248	O	2.66073	O
chr1_31_tRNAGlu_TTC+	TRE-TTC16-1	chr1:149719802-149719870	chr1	149719802	149719870	II	49	43	41	35	49	44	-0.113956	NO	-0.127379	NO	-0.0943274	NO
chr1_88_Pseudo_CCT-	TRR-CCT8-1	chr1:149728271-149728341	chr1	149728271	149728341	II	37	46	39	35	40	49	0.181838	NO	-0.0861566	NO	0.174498	NO
chr1_87_tRNAAla_AGC-	TRA-AGC20-1	chr1:150017382-150017452	chr1	150017382	150017452	II	34	16	29	28	31	20	-0.476438	NO	-0.0246621	NO	-0.286881	NO
AluSq_SINE_Alu_150849456	N/A	chr1:150849456-150849752	chr1	150849456	150849752	II	56	370	72	1282	70	894	2.21759	O	3.68513	O	3.20789	O
chr1_32_tRNAMet_CAT+	TRX-CAT1-1	chr1:153643726-153643797	chr1	153643726	153643797	II	46	9305	39	12044	51	10953	6.94051	O	7.45109	O	7.08313	O
chr1_86_tRNAArg_TCT-	TRR-TCT4-1	chr1:159111401-159111474	chr1	159111401	159111474	II	44	1516	53	4906	44	3785	4.38487	O	5.89409	O	5.68801	O
MER50_LTR_ERV1	N/A	chr1:160895487-160895761	chr1	160895487	160895761	other	45	558	58	1147	36	1293	2.97085	O	3.74147	O	4.3252	O
chr1_85_tRNAVal_CAC-	TRV-CAC1-1	chr1:161369490-161369562	chr1	161369490	161369562	II	64	7178	48	9805	67	9492	6.26079	O	6.97831	O	6.61714	O
chr1_33_Pseudo_???+	TRU-NNN3-1	chr1:161390661-161390733	chr1	161390661	161390733	II	67	130	64	344	54	309	0.722015	NO	1.99231	O	2.01282	O
chr1_84_tRNAGlu_TTC-	TRE-TTC4-2	chr1:161391883-161391954	chr1	161391883	161391954	II	73	5757	83	10471	93	8566	5.8121	O	6.53806	O	6.12694	O
chr1_83_tRNAAsn_GTT-	TRN-GTT2-2	chr1:161397867-161397940	chr1	161397867	161397940	II	39	6426	31	10202	39	10030	6.5479	O	7.39006	O	7.18782	O
chr1_82_tRNAGly_TCC-	TRG-TCC4-1	chr1:161409961-161410032	chr1	161409961	161410032	II	67	2622	62	6244	34	6492	4.77295	O	6.09161	O	6.6711	O
chr1_81_tRNAAsp_GTC-	TRD-GTC2-1	chr1:161410615-161410686	chr1	161410615	161410686	II	75	2658	84	5636	59	5041	4.67807	O	5.63522	O	5.83232	O
chr1_34_tRNALeu_CAG+	TRL-CAG1-1	chr1:161411323-161411405	chr1	161411323	161411405	II	159	789	177	2142	135	2233	2.11548	O	3.39132	O	3.7777	O
chr1_35_tRNAGly_GCC+	TRG-GCC1-1	chr1:161413094-161413164	chr1	161413094	161413164	II	269	1558	307	4233	221	3995	2.40899	O	3.66105	O	4.00323	O
chr1_80_tRNAGlu_CTC-	TRE-CTC1-2	chr1:161417018-161417089	chr1	161417018	161417089	II	184	7289	260	14737	165	15079	5.09596	O	5.67018	O	6.27579	O
chr1_79_tRNAGly_TCC-	TRG-TCC2-2	chr1:161417375-161417446	chr1	161417375	161417446	II	63	898	91	2226	52	2526	3.31882	O	4.22069	O	4.96212	O
chr1_78_tRNAAsp_GTC-	TRD-GTC2-2	chr1:161418033-161418104	chr1	161418033	161418104	II	127	1456	121	3720	78	3611	3.2426	O	4.63427	O	5.07523	O
chr1_36_tRNALeu_CAG+	TRL-CAG1-2	chr1:161418741-161418823	chr1	161418741	161418823	II	169	872	187	2359	145	2498	2.18036	O	3.46064	O	3.85257	O
chr1_37_tRNAGly_GCC+	TRG-GCC1-2	chr1:161420467-161420537	chr1	161420467	161420537	II	351	1828	417	4913	295	4621	2.28589	O	3.46704	O	3.83903	O
chr1_77_tRNAGlu_CTC-	TRE-CTC1-3	chr1:161424398-161424469	chr1	161424398	161424469	II	203	5722	247	11924	180	12127	4.62566	O	5.43146	O	5.85525	O
chr1_76_tRNAGly_TCC-	TRG-TCC2-3	chr1:161424756-161424827	chr1	161424756	161424827	II	95	830	117	2110	84	2388	2.78241	O	3.86372	O	4.40671	O
chr1_75_tRNAAsp_GTC-	TRD-GTC2-3	chr1:161425414-161425485	chr1	161425414	161425485	II	127	1456	121	3720	78	3611	3.2426	O	4.63427	O	5.07523	O
chr1_38_tRNALeu_CAG+	TRL-CAG1-3	chr1:161426122-161426204	chr1	161426122	161426204	II	132	622	148	1667	116	1785	2.00888	O	3.25304	O	3.63593	O
chr1_39_tRNAGly_GCC+	TRG-GCC1-3	chr1:161427898-161427968	chr1	161427898	161427968	II	269	1558	307	4233	221	3995	2.40899	O	3.66105	O	4.00323	O
chr1_74_tRNAGlu_CTC-	TRE-CTC1-4	chr1:161431809-161431880	chr1	161431809	161431880	II	184	7289	260	14737	165	15079	5.09596	O	5.67018	O	6.27579	O
chr1_73_tRNAGly_TCC-	TRG-TCC2-4	chr1:161432166-161432237	chr1	161432166	161432237	II	63	898	91	2226	52	2526	3.31882	O	4.22069	O	4.96212	O
chr1_72_tRNAAsp_GTC-	TRD-GTC2-4	chr1:161432824-161432895	chr1	161432824	161432895	II	127	1456	121	3720	78	3611	3.2426	O	4.63427	O	5.07523	O
chr1_40_tRNALeu_CAG+	TRL-CAG1-4	chr1:161433532-161433614	chr1	161433532	161433614	II	169	872	187	2359	145	2498	2.18036	O	3.46064	O	3.85257	O
chr1_41_tRNAGly_GCC+	TRG-GCC1-4	chr1:161435258-161435328	chr1	161435258	161435328	II	351	1828	417	4913	295	4621	2.28589	O	3.46704	O	3.83903	O
chr1_71_tRNAGlu_CTC-	TRE-CTC1-5	chr1:161439189-161439260	chr1	161439189	161439260	II	203	5722	247	11924	180	12127	4.62566	O	5.43146	O	5.85525	O
chr1_70_tRNAGly_TCC-	TRG-TCC2-5	chr1:161439547-161439618	chr1	161439547	161439618	II	95	830	117	2110	84	2388	2.78241	O	3.86372	O	4.40671	O
chr1_69_tRNAAsp_GTC-	TRD-GTC2-5	chr1:161440205-161440276	chr1	161440205	161440276	II	123	1384	116	3416	76	3389	3.20818	O	4.56088	O	5.01144	O
chr1_42_tRNALeu_CAG+	TRL-CAG1-5	chr1:161440913-161440995	chr1	161440913	161440995	II	169	872	187	2359	145	2498	2.18036	O	3.46064	O	3.85257	O
chr1_43_tRNAGly_GCC+	TRG-GCC4-1	chr1:161450356-161450426	chr1	161450356	161450426	II	111	474	122	833	84	1067	1.83773	O	2.50529	O	3.26646	O
chr1_44_Pseudo_GTC+	TRD-GTC10-1	chr1:161492935-161493006	chr1	161492935	161493006	II	42	186	54	296	46	250	1.58496	O	1.95641	O	1.88136	O
chr1_68_tRNAGly_GCC-	TRG-GCC2-1	chr1:161493637-161493707	chr1	161493637	161493707	II	32	7598	36	9631	47	9939	6.94289	O	7.19356	O	7.01645	O
chr1_67_tRNALeu_CAG-	TRL-CAG1-6	chr1:161500132-161500214	chr1	161500132	161500214	II	36	8983	23	12160	31	10774	7.0934	O	7.84549	O	7.46854	O
chr1_45_tRNAGly_TCC+	TRG-TCC2-6	chr1:161500903-161500974	chr1	161500903	161500974	II	52	10127	55	13067	37	11204	6.95263	O	7.26756	O	7.38949	O
chr1_46_tRNAAsp_GTC+	TRD-GTC7-1	chr1:161501915-161501986	chr1	161501915	161501986	II	25	50	13	113	16	101	0.540568	NO	1.73361	O	1.50986	O
chr1_47_tRNAAsn_GTT+	TRN-GTT1-1	chr1:161510031-161510104	chr1	161510031	161510104	II	86	8715	108	13741	82	11733	6.23626	O	6.64082	O	6.71461	O
chr1_48_tRNAAsp_GTC+	TRD-GTC9-1	chr1:161574588-161574659	chr1	161574588	161574659	II	0	2	0	4	0	2	0.0931094	NO	0.180572	NO	0.0931094	NO
chr1_66_tRNALeu_CAA-	TRL-CAA6-1	chr1:161581736-161581819	chr1	161581736	161581819	II	4	496	1	766	4	705	3.95146	O	4.68243	O	4.43414	O
chr1_49_tRNAGlu_TTC+	TRE-TTC5-1	chr1:161582508-161582579	chr1	161582508	161582579	II	3	27	0	45	0	57	0.788496	NO	1.32193	O	1.53605	O
chr1_50_tRNAAsn_GTT+	TRN-GTT17-1	chr1:161591465-161591538	chr1	161591465	161591538	II	0	17	0	22	0	21	0.647698	NO	0.793549	NO	0.765535	NO
chr1_51_Pseudo_CTT+	TRK-CTT13-1	chr1:165566150-165566222	chr1	165566150	165566222	II	35	41	33	37	35	33	0.127379	NO	0.0888093	NO	-0.0450879	NO
chr1_52_tRNAPro_CGG+	TRP-CGG1-1	chr1:167683962-167684033	chr1	167683962	167684033	II	81	9594	97	12797	73	12317	6.43801	O	6.65821	O	6.90537	O
chr1_65_tRNAPro_AGG-	TRP-AGG2-1	chr1:167684725-167684796	chr1	167684725	167684796	II	28	6409	28	8846	32	7597	6.79464	O	7.25771	O	6.9427	O
chr1_64_tRNAGlu_TTC-	TRE-TTC12-1	chr1:172157539-172157607	chr1	172157539	172157607	II	11	22	17	26	33	36	0.342888	NO	0.252766	NO	0.0671142	NO
chr1_53_Pseudo_???+	TRU-NNN7-1	chr1:178678038-178678110	chr1	178678038	178678110	II	16	27	16	42	39	35	0.309328	NO	0.646363	NO	-0.0861566	NO
chr1_63_tRNAVal_AAC-	TRV-AAC7-1	chr1:180184276-180184348	chr1	180184276	180184348	II	30	20	36	25	32	29	-0.263034	NO	-0.263034	NO	-0.0715533	NO
chr1_54_tRNALys_TTT+	TRK-TTT3-1	chr1:204475655-204475727	chr1	204475655	204475727	II	25	6763	36	8917	32	8834	6.94847	O	7.08279	O	7.15955	O
chr1_62_tRNALys_TTT-	TRK-TTT3-2	chr1:204476158-204476230	chr1	204476158	204476230	II	39	9100	49	13265	43	11482	7.04787	O	7.39482	O	7.30103	O
chr1_55_tRNALys_TTT+	TRK-TTT8-1	chr1:205443271-205443343	chr1	205443271	205443343	II	55	63	54	75	36	72	0.129768	NO	0.321928	NO	0.628031	NO
chr1_61_Pseudo_TGG-	TRP-TGG5-1	chr1:207178154-207178230	chr1	207178154	207178230	II	47	25	58	46	45	41	-0.485427	NO	-0.211504	NO	-0.0790716	NO
chr1_56_tRNAThr_TGT+	TRT-TGT2-1	chr1:222638347-222638419	chr1	222638347	222638419	II	34	5185	37	10489	47	9332	6.34845	O	7.29462	O	6.92581	O
5S_rRNA-related_1	RN5S1@	chr1:228746011-228746133	chr1	228746011	228746133	I	176	6377	182	8746	139	10598	4.95893	O	5.37143	O	5.9747	O
5S_rRNA-related_2	RN5S1@	chr1:228748252-228748374	chr1	228748252	228748374	I	176	6377	182	8746	139	10598	4.95893	O	5.37143	O	5.9747	O
5S_rRNA-related_3	RN5S1@	chr1:228750493-228750615	chr1	228750493	228750615	I	176	6377	182	8746	139	10598	4.95893	O	5.37143	O	5.9747	O
5S_rRNA-related_4	RN5S1@	chr1:228752734-228752856	chr1	228752734	228752856	I	167	6368	171	8731	134	10577	5.02135	O	5.44583	O	6.01518	O
5S_rRNA-related_5	RN5S1@	chr1:228754975-228755097	chr1	228754975	228755097	I	176	6377	182	8746	139	10598	4.95893	O	5.37143	O	5.9747	O
5S_rRNA-related_6	RN5S1@	chr1:228757190-228757312	chr1	228757190	228757312	I	167	6368	171	8731	134	10577	5.02135	O	5.44583	O	6.01518	O
RN5S_1	RN5S1@	chr1:228759411-228759532	chr1	228759411	228759532	I	166	6367	170	8729	134	10575	5.02847	O	5.45269	O	6.0149	O
RN5S_2	RN5S1@	chr1:228761653-228761774	chr1	228761653	228761774	I	175	6376	181	8744	139	10597	4.96573	O	5.37792	O	5.97457	O
RN5S_3	RN5S1@	chr1:228763892-228764013	chr1	228763892	228764013	I	177	3268	172	4556	135	5470	3.99389	O	4.50481	O	5.05889	O
RN5S_4	RN5S1@	chr1:228766134-228766255	chr1	228766134	228766255	I	175	6376	181	8744	139	10597	4.96573	O	5.37792	O	5.97457	O
RN5S_5	RN5S1@	chr1:228768375-228768496	chr1	228768375	228768496	I	176	6387	200	8760	142	10606	4.96118	O	5.25616	O	5.9504	O
RN5S_6	RN5S1@	chr1:228770615-228770736	chr1	228770615	228770736	I	175	6376	181	8744	139	10597	4.96573	O	5.37792	O	5.97457	O
RN5S_7	RN5S1@	chr1:228772840-228772961	chr1	228772840	228772961	I	175	6376	181	8744	139	10597	4.96573	O	5.37792	O	5.97457	O
RN5S_8	RN5S1@	chr1:228775081-228775202	chr1	228775081	228775202	I	169	6369	173	8733	133	10589	5.00701	O	5.43187	O	6.02563	O
RN5S_9	RN5S1@	chr1:228777312-228777433	chr1	228777312	228777433	I	110	4922	117	6735	88	8157	5.14451	O	5.5242	O	6.11648	O
RN5S_10	RN5S1@	chr1:228779553-228779674	chr1	228779553	228779674	I	110	4922	117	6735	88	8157	5.14451	O	5.5242	O	6.11648	O
RN5S_11	RN5S1@	chr1:228781784-228781905	chr1	228781784	228781905	I	175	6376	181	8744	139	10597	4.96573	O	5.37792	O	5.97457	O
chr1_57_Pseudo_TGG+	NMTRP-TGG1-1	chr1:238105862-238105933	chr1	238105862	238105933	II	17	21	3	20	16	29	0.117836	NO	0.599462	NO	0.359081	NO
chr1_60_Pseudo_TAA-	NMTRL-TAA3-1	chr1:238106956-238107030	chr1	238106956	238107030	II	17	9	2	11	9	9	-0.269187	NO	0.357552	NO	0	NO
chr1_58_tRNALeu_CAA_I+	TRL-CAA4-1	chr1:249168054-249168159	chr1	249168054	249168159	II	71	11642	82	17163	78	16054	6.85255	O	7.26218	O	7.21845	O
chr1_59_tRNAGlu_CTC+	TRE-CTC2-1	chr1:249168447-249168518	chr1	249168447	249168518	II	19	6228	41	9120	34	9040	6.99678	O	7.00981	O	7.14689	O
chr2_1_Pseudo_CCC+	TRG-CCC7-1	chr2:11691827-11691898	chr2	11691827	11691898	II	46	245	22	431	39	455	1.85536	O	3.14818	O	2.81332	O
chr2_2_tRNATyr_GTA_I+	TRY-GTA2-1	chr2:27273650-27273738	chr2	27273650	27273738	II	72	15633	59	21722	46	16627	7.26265	O	7.93313	O	7.77591	O
chr2_3_tRNAAla_AGC+	TRA-AGC8-1	chr2:27274082-27274154	chr2	27274082	27274154	II	95	14891	86	19899	96	15349	6.89927	O	7.4246	O	6.93139	O
chr2_4_tRNALeu_AAG+	TRL-AAG5-1	chr2:30277568-30277640	chr2	30277568	30277640	II	46	32	53	36	46	44	-0.293731	NO	-0.330645	NO	-0.0384741	NO
chr2_5_tRNAIle_TAT_I+	TRI-TAT2-1	chr2:43037676-43037768	chr2	43037676	43037768	II	61	11686	94	17057	56	12399	7.0084	O	7.10642	O	7.17516	O
chr2_28_Pseudo_TTG-	TRQ-TTG5-1	chr2:45937441-45937513	chr2	45937441	45937513	II	31	23	32	38	27	32	-0.202817	NO	0.133267	NO	0.121306	NO
AluY_SINE_Alu_62819118	N/A	chr2:62819118-62819430	chr2	62819118	62819430	II	36	33	43	37	42	22	-0.0671142	NO	-0.123735	NO	-0.469485	NO
chr2_27_tRNAGly_CCC-	TRG-CCC2-1	chr2:70476123-70476193	chr2	70476123	70476193	II	21	8259	17	11444	22	9748	7.34456	O	7.93149	O	7.55488	O
chr2_26_Pseudo_???-	TRU-NNN9-1	chr2:70663957-70664027	chr2	70663957	70664027	II	31	26	22	23	27	26	-0.123382	NO	0.0274807	NO	-0.0255351	NO
chr2_25_Pseudo_CTC-	TRE-CTC15-1	chr2:71273488-71273560	chr2	71273488	71273560	II	75	74	46	69	55	68	-0.0138058	NO	0.381429	NO	0.205319	NO
chr2_6_tRNAGlu_TTC+	TRE-TTC13-1	chr2:75124046-75124114	chr2	75124046	75124114	II	15	24	23	51	15	37	0.263034	NO	0.61193	NO	0.574236	NO
chr2_7_Pseudo_AGG+	TRP-AGG5-1	chr2:77895593-77895663	chr2	77895593	77895663	II	13	12	11	23	18	22	-0.0339473	NO	0.370368	NO	0.115477	NO
chr2_8_Pseudo_AGG+	TRP-AGG4-1	chr2:87339573-87339644	chr2	87339573	87339644	II	38	22	30	19	24	23	-0.387023	NO	-0.292181	NO	-0.026967	NO
chr2_24_Pseudo_CTC-	TRE-CTC13-1	chr2:96217194-96217265	chr2	96217194	96217265	II	67	93	65	138	64	146	0.342602	NO	0.822462	NO	0.904843	NO
chr2_9_Pseudo_TAA+	NMTRL-TAA2-1	chr2:117781417-117781491	chr2	117781417	117781491	II	14	18	32	21	21	30	0.125531	NO	-0.281771	NO	0.234465	NO
chr2_23_tRNAGln_TTG-	NMTRQ-TTG3-1	chr2:117782509-117782580	chr2	117782509	117782580	II	14	18	11	15	15	15	0.125531	NO	0.134301	NO	0	NO
chr2_22_Pseudo_TTG-	NMTRQ-TTG7-1	chr2:131029911-131029982	chr2	131029911	131029982	II	9	24	13	26	13	30	0.469485	NO	0.38109	NO	0.480626	NO
chr2_21_tRNASer_TGA-	NMTRS-TGA1-1	chr2:131033024-131033093	chr2	131033024	131033093	II	11	15	5	17	11	15	0.134301	NO	0.425306	NO	0.134301	NO
chr2_20_tRNAGlu_TTC-	TRE-TTC1-1	chr2:131094701-131094772	chr2	131094701	131094772	II	62	7811	81	11240	55	8979	6.41326	O	6.66578	O	6.72776	O
chr2_10_Pseudo_TGA+	NMTRS-TGA2-1	chr2:132140142-132140211	chr2	132140142	132140211	II	9	21	6	15	19	15	0.387023	NO	0.321928	NO	-0.122857	NO
chr2_11_Pseudo_TTG+	NMTRQ-TTG9-1	chr2:132143133-132143204	chr2	132143133	132143204	II	14	20	9	23	13	28	0.184425	NO	0.442518	NO	0.431716	NO
hsa-mir-1978	N/A	chr2:149639365-149639417	chr2	149639365	149639417	other	638	291	679	213	629	218	-1.05727	NO	-1.54483	NO	-1.40994	NO
chr2_12_Pseudo_CTC+	TRE-CTC9-1	chr2:151219277-151219349	chr2	151219277	151219349	II	27	26	26	42	18	29	-0.0255351	NO	0.36257	NO	0.297681	NO
chr2_13_tRNAAla_CGC+	TRA-CGC3-1	chr2:157257281-157257352	chr2	157257281	157257352	II	32	8079	29	11507	35	10694	7.03111	O	7.61134	O	7.36619	O
chr2_19_tRNAGly_GCC-	TRG-GCC2-2	chr2:157257659-157257729	chr2	157257659	157257729	II	29	8120	19	10790	28	10579	7.10994	O	7.7867	O	7.51502	O
chr2_18_Pseudo_CTC-	TRE-CTC7-1	chr2:159738171-159738242	chr2	159738171	159738242	II	55	39	61	51	35	55	-0.300866	NO	-0.167945	NO	0.387023	NO
chr2_17_Pseudo_TTC-	TRE-TTC9-1	chr2:204229131-204229201	chr2	204229131	204229201	II	26	52	36	56	31	81	0.550197	NO	0.381871	NO	0.863679	NO
chr2_14_tRNATyr_ATA_I+	TRY-ATA1-1	chr2:219110549-219110641	chr2	219110549	219110641	II	35	34	67	41	55	35	-0.0223678	NO	-0.450166	NO	-0.387023	NO
chr2_15_Pseudo_CTG+	TRQ-CTG16-1	chr2:219491132-219491207	chr2	219491132	219491207	II	29	48	51	72	31	78	0.402759	NO	0.332575	NO	0.82415	NO
chr2_16_Pseudo_TTT-	TRK-TTT15-1	chr2:224186315-224186387	chr2	224186315	224186387	II	38	15	48	31	47	32	-0.59561	NO	-0.354665	NO	-0.31259	NO
chr3_1_Pseudo_CTA+	TR*-CTA2-1	chr3:13833886-13833953	chr3	13833886	13833953	II	83	33	84	44	51	48	-0.842899	NO	-0.623437	NO	-0.0544478	NO
chr3_12_Pseudo_GCA-	TRC-GCA25-1	chr3:17741392-17741464	chr3	17741392	17741464	II	31	17	17	19	17	14	-0.376148	NO	0.060121	NO	-0.0951572	NO
chr3_11_tRNAArg_ACG-	TRR-ACG2-1	chr3:45730491-45730563	chr3	45730491	45730563	II	91	12394	79	17103	69	13199	6.68198	O	7.29631	O	7.06206	O
chr3_10_Pseudo_CTC-	TRE-CTC12-1	chr3:103879524-103879595	chr3	103879524	103879595	II	8	15	7	15	8	13	0.243926	NO	0.2824	NO	0.178337	NO
chr3_9_Pseudo_TTG-	NMTRQ-TTG4-1	chr3:106620878-106620949	chr3	106620878	106620949	II	17	24	9	23	8	31	0.200299	NO	0.442518	NO	0.68281	NO
chr3_8_tRNAGlu_CTC-	TRE-CTC8-1	chr3:125413177-125413248	chr3	125413177	125413248	II	53	53	111	61	57	40	0	NO	-0.631757	NO	-0.31366	NO
chr3_7_tRNACys_GCA-	TRC-GCA6-1	chr3:131947944-131948015	chr3	131947944	131948015	II	29	187	22	443	20	442	1.87891	O	3.18526	O	3.23879	O
chr3_6_tRNACys_GCA-	TRC-GCA9-1	chr3:131950642-131950713	chr3	131950642	131950713	II	27	871	34	1829	29	1635	3.98249	O	4.86031	O	4.81866	O
chr3_5_tRNALeu_AAG-	TRL-AAG8-1	chr3:148221228-148221309	chr3	148221228	148221309	II	43	29	31	20	34	23	-0.307182	NO	-0.286881	NO	-0.27208	NO
chr3_4_tRNAHis_GTG-	TRH-GTG3-1	chr3:148316563-148316634	chr3	148316563	148316634	II	22	19	6	19	11	18	-0.0857299	NO	0.444785	NO	0.22741	NO
chr3_2_tRNAVal_AAC+	TRV-AAC1-1	chr3:169490018-169490090	chr3	169490018	169490090	II	16	2846	23	4083	15	4406	5.96629	O	6.27805	O	6.62319	O
5S_rRNA-related_7	RN5S@	chr3:179879672-179879765	chr3	179879672	179879765	I	36	25	28	40	37	45	-0.263034	NO	0.271302	NO	0.16273	NO
RN5S_12	RN5S@	chr3:181540492-181540892	chr3	181540492	181540892	I	82	52	68	47	56	39	-0.449803	NO	-0.347923	NO	-0.31774	NO
chr3_3_tRNAAsp_GTC-	TRD-GTC6-1	chr3:184366095-184366165	chr3	184366095	184366165	II	47	47	38	30	58	35	0	NO	-0.180572	NO	-0.437064	NO
FLAM_C_SINE_Alu	N/A	chr3:195871503-195871903	chr3	195871503	195871903	II	97	532	88	1468	90	1047	2.14574	O	3.66618	O	3.16591	O
chr4_5_Pseudo_TTA-	TR*-TTA3-1	chr4:7325838-7325909	chr4	7325838	7325909	II	71	95	88	155	47	147	0.307573	NO	0.648738	NO	1.20082	O
chr4_4_tRNAGln_TTG-	TRQ-TTG6-1	chr4:40908743-40908815	chr4	40908743	40908815	II	33	26	13	52	18	35	-0.169925	NO	0.931287	NO	0.437405	NO
GABRB1_Intronic(AluSp)	N/A	chr4:47121394-47121819	chr4	47121394	47121819	II	41	595	56	1622	28	715	3.13797	O	4.26373	O	3.68312	O
LNX1_Intronic(Alu_FLAM_C)	N/A	chr4:54345254-54345404	chr4	54345254	54345404	II	35	617	31	2107	36	1059	3.31525	O	5.13063	O	4.04439	O
chr4_3_tRNACys_GCA-	TRC-GCA2-1	chr4:124430005-124430076	chr4	124430005	124430076	II	65	203	44	569	51	487	1.29433	O	3.01696	O	2.67417	O
MIRb_SINE_MIR_146808377	N/A	chr4:146808377-146808458	chr4	146808377	146808458	II	39	697	51	1749	50	1443	3.39729	O	4.457	O	4.20261	O
chr4_1_Pseudo_TTG+	NMTRQ-TTG15-1	chr4:156383888-156383959	chr4	156383888	156383959	II	15	25	22	29	14	31	0.289507	NO	0.182203	NO	0.471306	NO
chr4_2_tRNALeu_TAA-	NMTRL-TAA1-1	chr4:156384978-156385052	chr4	156384978	156385052	II	18	42	8	34	33	32	0.584963	NO	0.752072	NO	-0.0230836	NO
chr5_24_tRNALys_CTT-	TRK-CTT9-1	chr5:26198539-26198611	chr5	26198539	26198611	II	7	16	19	13	12	8	0.314109	NO	-0.188445	NO	-0.14439	NO
chr5_23_Pseudo_TTG-	TRQ-TTG7-1	chr5:77318776-77318848	chr5	77318776	77318848	II	23	20	11	29	27	24	-0.0840643	NO	0.525091	NO	-0.0780025	NO
HVG2_hsa-mir-886	N/A	chr5:135416177-135416297	chr5	135416177	135416297	II	98	10811	91	16371	84	12398	6.40421	O	7.08263	O	6.76842	O
VTRNA1-1	VTRNA1-1	chr5:140090860-140090958	chr5	140090860	140090958	II	57	7711	38	10879	51	10660	6.47536	O	7.32577	O	7.04412	O
VTRNA1-2	VTRNA1-2	chr5:140098510-140098598	chr5	140098510	140098598	II	81	11777	82	15490	56	12373	6.73294	O	7.11449	O	7.17214	O
VTRNA1-3	VTRNA1-3	chr5:140105743-140105831	chr5	140105743	140105831	II	58	9472	51	15015	62	13225	6.75458	O	7.53715	O	7.17069	O
chr5_22_tRNAAsp_GTC-	TRD-GTC5-1	chr5:141773988-141774059	chr5	141773988	141774059	II	15	23	18	19	23	21	0.236067	NO	0.0297473	NO	-0.0554951	NO
chr5_21_Pseudo_CTG-	TRQ-CTG13-1	chr5:151248074-151248145	chr5	151248074	151248145	II	63	49	33	51	37	53	-0.235378	NO	0.36257	NO	0.30895	NO
chr5_1_Pseudo_ACA_I+	TRC-ACA1-1	chr5:151988596-151988771	chr5	151988596	151988771	II	18	17	19	18	10	25	-0.0303736	NO	-0.0297473	NO	0.459432	NO
chr5_20_tRNALeu_CAG-	TRL-CAG3-1	chr5:159392041-159392118	chr5	159392041	159392118	II	55	61	87	51	58	40	0.0984037	NO	-0.530515	NO	-0.330149	NO
chr5_2_tRNAVal_CAC+	TRV-CAC1-2	chr5:180524070-180524142	chr5	180524070	180524142	II	54	2274	51	5957	52	6229	4.77761	O	6.20777	O	6.25416	O
chr5_19_tRNALeu_AAG-	TRL-AAG1-1	chr5:180524474-180524555	chr5	180524474	180524555	II	69	1046	46	3103	45	2833	3.44211	O	5.3654	O	5.25449	O
chr5_3_tRNALeu_AAG+	TRL-AAG1-2	chr5:180528840-180528921	chr5	180528840	180528921	II	70	1704	46	4774	48	4573	4.11603	O	5.98209	O	5.88296	O
chr5_18_tRNAVal_CAC-	TRV-CAC1-3	chr5:180529253-180529325	chr5	180529253	180529325	II	47	1969	53	5096	50	5423	4.69828	O	5.94858	O	6.09091	O
chr5_4_tRNAVal_AAC+	TRV-AAC1-2	chr5:180591154-180591226	chr5	180591154	180591226	II	35	1920	46	3622	47	3796	4.90689	O	5.58654	O	5.63483	O
chr5_17_Pseudo_AAG-	TRL-AAG7-1	chr5:180591564-180591645	chr5	180591564	180591645	II	63	751	46	1529	62	1435	3.07002	O	4.35848	O	3.99312	O
chr5_5_tRNAVal_AAC+	TRV-AAC1-3	chr5:180596610-180596682	chr5	180596610	180596682	II	65	4135	88	8096	55	7512	5.45425	O	6.10569	O	6.47134	O
chr5_6_tRNAVal_CAC+	TRV-CAC1-4	chr5:180600650-180600722	chr5	180600650	180600722	II	69	1641	51	3292	50	3746	4.07714	O	5.35799	O	5.56071	O
chr5_16_tRNALeu_AAG-	TRL-AAG1-3	chr5:180601044-180601125	chr5	180601044	180601125	II	79	613	71	1327	60	1218	2.56049	O	3.74799	O	3.79355	O
chr5_7_tRNALeu_AAG+	TRL-AAG2-1	chr5:180614701-180614782	chr5	180614701	180614782	II	67	8119	88	14109	60	12338	6.39249	O	6.90475	O	7.10247	O
chr5_15_tRNAVal_AAC-	TRV-AAC2-1	chr5:180615416-180615488	chr5	180615416	180615488	II	62	6484	46	9277	42	8943	6.14577	O	6.93617	O	6.96145	O
chr5_14_tRNAPro_TGG-	TRP-TGG3-1	chr5:180615854-180615925	chr5	180615854	180615925	II	87	5277	79	7488	64	7296	5.50332	O	6.10795	O	6.28422	O
chr5_13_tRNAThr_TGT-	TRT-TGT6-1	chr5:180618687-180618758	chr5	180618687	180618758	II	54	7108	64	9321	45	8946	6.40899	O	6.63632	O	6.90304	O
chr5_8_tRNAAla_TGC+	TRA-TGC3-1	chr5:180633868-180633939	chr5	180633868	180633939	II	71	10508	83	13542	64	10155	6.7051	O	6.90817	O	6.75957	O
chr5_9_tRNALys_CTT+	TRK-CTT2-2	chr5:180634755-180634827	chr5	180634755	180634827	II	52	7316	32	11299	46	10617	6.48519	O	7.51354	O	7.13023	O
chr5_12_tRNAVal_AAC-	TRV-AAC1-4	chr5:180645270-180645342	chr5	180645270	180645342	II	36	4034	29	6785	25	6336	5.94429	O	6.85185	O	6.85481	O
chr5_11_tRNALys_CTT-	TRK-CTT2-3	chr5:180648979-180649051	chr5	180648979	180649051	II	67	9290	81	15026	70	11562	6.5862	O	7.08364	O	6.85699	O
chr5_10_tRNAVal_CAC-	TRV-CAC1-5	chr5:180649395-180649467	chr5	180649395	180649467	II	101	10869	112	15294	92	12116	6.37849	O	6.75376	O	6.63746	O
chr6_1_tRNAGln_CTG+	TRQ-CTG1-1	chr6:18836402-18836473	chr6	18836402	18836473	II	31	42	38	77	27	64	0.239188	NO	0.654004	NO	0.721699	NO
chr6_2_tRNAMet_CAT+	TRX-CAT1-2	chr6:26286754-26286825	chr6	26286754	26286825	II	17	3280	18	4717	14	4563	6.13803	O	6.62784	O	6.70579	O
chr6_3_tRNAArg_TCG+	TRR-TCG4-1	chr6:26299905-26299977	chr6	26299905	26299977	II	19	332	19	947	22	872	2.88514	O	4.3175	O	4.11654	O
chr6_175_tRNASer_GCT-	TRS-GCT6-1	chr6:26305718-26305801	chr6	26305718	26305801	II	17	5147	28	11198	27	9850	6.78331	O	7.59683	O	7.43741	O
chr6_174_tRNAGln_TTG-	TRQ-TTG3-1	chr6:26311424-26311495	chr6	26311424	26311495	II	23	2837	27	6419	18	5550	5.75741	O	6.82197	O	6.86109	O
chr6_173_tRNAGln_TTG-	TRQ-TTG3-2	chr6:26311975-26312046	chr6	26311975	26312046	II	44	3789	46	7306	44	6712	5.68953	O	6.59285	O	6.50951	O
chr6_172_tRNASer_TGA-	TRS-TGA3-1	chr6:26312824-26312905	chr6	26312824	26312905	II	23	3390	29	7008	26	6855	6.01186	O	6.89831	O	6.94189	O
chr6_171_tRNAMet_CAT-	TRX-CAT1-3	chr6:26313352-26313423	chr6	26313352	26313423	II	28	5549	44	9316	38	8685	6.58781	O	6.98068	O	7.00182	O
chr6_170_tRNATrp_CCA-	TRW-CCA3-1	chr6:26319330-26319401	chr6	26319330	26319401	II	32	476	37	1237	31	1223	3.0288	O	4.24111	O	4.36043	O
chr6_4_tRNAArg_TCG+	TRR-TCG2-1	chr6:26323046-26323118	chr6	26323046	26323118	II	26	5839	58	10411	38	9738	6.71154	O	6.89054	O	7.16638	O
chr6_5_tRNASer_AGA+	TRS-AGA2-1	chr6:26327817-26327898	chr6	26327817	26327898	II	14	4718	17	7129	17	7328	6.75367	O	7.25095	O	7.29051	O
chr6_6_tRNAArg_ACG+	TRR-ACG1-1	chr6:26328368-26328440	chr6	26328368	26328440	II	11	3472	11	5877	11	6179	6.41641	O	7.17066	O	7.24259	O
chr6_169_tRNAMet_CAT-	TRX-CAT1-4	chr6:26330529-26330600	chr6	26330529	26330600	II	29	6703	22	10443	11	9261	6.83439	O	7.65395	O	7.82407	O
chr6_168_tRNATrp_CCA-	TRW-CCA3-2	chr6:26331672-26331743	chr6	26331672	26331743	II	23	4228	46	8631	38	8015	6.32804	O	6.83239	O	6.88641	O
chr6_7_tRNALeu_CAG+	TRL-CAG1-7	chr6:26521436-26521518	chr6	26521436	26521518	II	11	4070	18	5552	14	5350	6.64386	O	6.8616	O	6.93396	O
chr6_167_tRNAThr_AGT-	TRT-AGT2-1	chr6:26533145-26533218	chr6	26533145	26533218	II	48	10620	48	15521	31	12865	7.09316	O	7.63932	O	7.72379	O
chr6_8_tRNAArg_ACG+	TRR-ACG1-2	chr6:26537726-26537798	chr6	26537726	26537798	II	53	6480	39	11836	45	10709	6.2934	O	7.42602	O	7.16175	O
chr6_9_tRNAVal_CAC+	TRV-CAC1-6	chr6:26538282-26538354	chr6	26538282	26538354	II	49	4230	69	6545	64	6313	5.75286	O	6.05342	O	6.07636	O
chr6_10_tRNAAla_CGC+	TRA-CGC1-1	chr6:26553731-26553802	chr6	26553731	26553802	II	32	5107	32	7905	40	8012	6.37251	O	6.99982	O	6.84406	O
chr6_11_tRNAIle_AAT+	TRI-AAT5-1	chr6:26554350-26554423	chr6	26554350	26554423	II	52	8356	32	11892	52	10593	6.67622	O	7.58714	O	7.01735	O
chr6_12_tRNAPro_AGG+	TRP-AGG2-2	chr6:26555498-26555569	chr6	26555498	26555569	II	27	2791	12	5133	13	4598	5.6291	O	6.94168	O	6.74991	O
chr6_13_tRNALys_CTT+	TRK-CTT2-4	chr6:26556774-26556846	chr6	26556774	26556846	II	22	3976	42	7374	32	7467	6.26751	O	6.68416	O	6.9179	O
chr6_14_tRNATyr_GTA_I+	TRY-GTA1-1	chr6:26569086-26569176	chr6	26569086	26569176	II	56	7162	36	10486	35	8477	6.38591	O	7.3159	O	7.03207	O
chr6_166_tRNAAla_AGC-	TRA-AGC11-1	chr6:26572092-26572164	chr6	26572092	26572164	II	42	7585	69	11487	30	10626	6.7247	O	6.86212	O	7.47249	O
chr6_15_tRNATyr_GTA_I+	TRY-GTA8-1	chr6:26575798-26575887	chr6	26575798	26575887	II	24	823	41	2386	29	1911	3.98151	O	5.08866	O	5.03994	O
chr6_16_tRNATyr_GTA_I+	TRY-GTA3-1	chr6:26577332-26577420	chr6	26577332	26577420	II	36	5069	33	10156	52	9997	6.2716	O	7.33702	O	6.93405	O
chr6_17_tRNATyr_GTA_I+	TRY-GTA6-1	chr6:26595102-26595190	chr6	26595102	26595190	II	11	1119	14	2901	12	2452	4.80861	O	6.05775	O	5.88497	O
chr6_18_tRNAAla_AGC+	TRA-AGC14-1	chr6:26673590-26673662	chr6	26673590	26673662	II	101	169	87	327	71	376	0.603202	NO	1.60942	O	2.00712	O
chr6_19_tRNAAla_AGC+	TRA-AGC12-1	chr6:26682715-26682787	chr6	26682715	26682787	II	70	223	67	660	39	531	1.33914	O	2.83054	O	3.02333	O
chr6_20_tRNAAla_AGC+	TRA-AGC10-1	chr6:26687485-26687557	chr6	26687485	26687557	II	106	334	111	605	83	717	1.42033	O	2.17106	O	2.72479	O
chr6_21_tRNAMet_CAT+	TRM-CAT5-1	chr6:26701712-26701784	chr6	26701712	26701784	II	72	2007	66	4929	64	4496	4.3198	O	5.69087	O	5.58943	O
chr6_22_tRNAAla_AGC+	TRA-AGC13-1	chr6:26705606-26705678	chr6	26705606	26705678	II	101	955	145	2066	91	2144	2.91056	O	3.58221	O	4.16727	O
chr6_165_tRNAIle_AAT-	TRI-AAT7-1	chr6:26721221-26721294	chr6	26721221	26721294	II	51	102	43	274	42	198	0.704544	NO	2.0581	O	1.66297	O
chr6_23_tRNAAla_AGC+	TRA-AGC18-1	chr6:26728256-26728328	chr6	26728256	26728328	II	49	1003	40	2128	40	2370	3.70884	O	4.9462	O	5.09954	O
chr6_24_tRNAAla_AGC+	TRA-AGC9-1	chr6:26730737-26730809	chr6	26730737	26730809	II	54	471	70	973	57	907	2.57635	O	3.32625	O	3.42896	O
chr6_164_tRNAMet_CAT-	TRM-CAT4-1	chr6:26735574-26735646	chr6	26735574	26735646	II	55	1756	43	3514	41	3789	4.39313	O	5.60134	O	5.74923	O
chr6_163_tRNAIle_AAT-	TRI-AAT6-1	chr6:26745255-26745328	chr6	26745255	26745328	II	31	1590	40	3818	29	2950	4.73104	O	5.78061	O	5.65845	O
chr6_25_tRNAAla_AGC+	TRA-AGC21-1	chr6:26751918-26751990	chr6	26751918	26751990	II	56	403	70	897	57	844	2.33196	O	3.21257	O	3.32855	O
chr6_26_tRNAUndet_???+	TRU-NNN1-1	chr6:26752630-26752703	chr6	26752630	26752703	II	77	59	32	126	46	100	-0.265734	NO	1.33121	O	0.77444	NO
chr6_162_tRNAMet_CAT-	TRM-CAT4-2	chr6:26758550-26758622	chr6	26758550	26758622	II	51	1702	55	2991	50	3011	4.41837	O	5.15142	O	5.2484	O
chr6_27_tRNAMet_CAT+	TRM-CAT4-3	chr6:26766444-26766516	chr6	26766444	26766516	II	71	1868	51	3697	48	4007	4.23205	O	5.52395	O	5.69367	O
chr6_161_tRNAAla_AGC-	TRA-AGC9-2	chr6:26771290-26771362	chr6	26771290	26771362	II	56	421	67	869	49	809	2.39072	O	3.21226	O	3.40875	O
chr6_160_tRNAAla_AGC-	TRA-AGC18-2	chr6:26773771-26773843	chr6	26773771	26773843	II	47	991	40	2116	41	2360	3.72898	O	4.93815	O	5.07305	O
chr6_28_tRNAIle_AAT+	TRI-AAT7-2	chr6:26780832-26780905	chr6	26780832	26780905	II	48	107	41	316	41	238	0.81263	NO	2.28488	O	1.91634	O
chr6_159_tRNAAla_AGC-	TRA-AGC12-2	chr6:26796006-26796078	chr6	26796006	26796078	II	48	129	38	343	33	305	1.02748	NO	2.45557	O	2.41074	O
chr6_29_tRNAIle_TAT_I+	TRI-TAT2-2	chr6:26988125-26988218	chr6	26988125	26988218	II	93	2709	93	6969	55	6314	4.47692	O	5.83042	O	6.22179	O
chr6_30_tRNAPro_CGG+	TRP-CGG2-1	chr6:27059521-27059592	chr6	27059521	27059592	II	31	1964	32	3696	24	4028	5.03071	O	5.90922	O	6.23167	O
chr6_31_tRNASer_GCT+	TRS-GCT1-1	chr6:27065085-27065166	chr6	27065085	27065166	II	45	2258	56	6472	41	5411	4.93105	O	6.2404	O	6.25991	O
chr6_32_tRNAVal_CAC+	TRV-CAC9-1	chr6:27118022-27118094	chr6	27118022	27118094	II	39	51	33	140	41	107	0.231326	NO	1.43211	O	0.948285	NO
chr6_33_tRNAHis_GTG+	TRH-GTG1-5	chr6:27125906-27125977	chr6	27125906	27125977	II	56	2883	48	8356	44	6403	5.08203	O	6.74836	O	6.44182	O
chr6_34_tRNAThr_AGT+	TRT-AGT6-1	chr6:27130050-27130123	chr6	27130050	27130123	II	21	2282	14	6033	16	5309	5.5025	O	7.10638	O	6.85879	O
chr6_158_tRNAIle_AAT-	TRI-AAT5-2	chr6:27144994-27145067	chr6	27144994	27145067	II	5	2925	17	4336	17	4390	6.39966	O	6.53751	O	6.55524	O
chr6_157_tRNAVal_CAC-	TRV-CAC6-1	chr6:27173867-27173939	chr6	27173867	27173939	II	22	103	32	252	23	299	1.35484	O	2.18536	O	2.63402	O
chr6_35_tRNASer_CGA+	TRS-CGA2-1	chr6:27177628-27177709	chr6	27177628	27177709	II	61	796	47	2275	38	1862	3.1822	O	4.90376	O	4.79823	O
chr6_156_tRNAArg_ACG-	TRR-ACG2-2	chr6:27181623-27181695	chr6	27181623	27181695	II	19	942	31	2367	20	1787	4.3101	O	5.29628	O	5.18349	O
chr6_36_tRNAArg_ACG+	TRR-ACG2-3	chr6:27182952-27183024	chr6	27182952	27183024	II	35	2792	66	5973	52	5969	5.44013	O	5.96651	O	6.19295	O
chr6_155_tRNALeu_TAA-	TRL-TAA4-1	chr6:27198334-27198416	chr6	27198334	27198416	II	25	1534	31	3403	44	3693	4.82967	O	5.81452	O	5.6528	O
chr6_37_tRNAVal_AAC+	TRV-AAC5-1	chr6:27203288-27203360	chr6	27203288	27203360	II	24	2039	28	3943	36	4114	5.25983	O	6.09803	O	5.97241	O
chr6_154_tRNAIle_AAT-	TRI-AAT5-3	chr6:27205350-27205423	chr6	27205350	27205423	II	43	3118	31	7093	47	6669	5.4304	O	6.86753	O	6.44294	O
chr6_38_tRNAIle_AAT+	TRI-AAT9-1	chr6:27241739-27241812	chr6	27241739	27241812	II	21	20	14	57	33	47	-0.0285692	NO	0.983512	NO	0.289507	NO
chr6_153_tRNAIle_AAT-	TRI-AAT3-1	chr6:27242990-27243063	chr6	27242990	27243063	II	32	276	33	662	24	612	2.30319	O	3.45735	O	3.57154	O
chr6_152_tRNAVal_CAC-	TRV-CAC2-1	chr6:27248049-27248121	chr6	27248049	27248121	II	28	4258	46	7436	32	7266	6.20811	O	6.61819	O	6.87869	O
chr6_39_Pseudo_AAT+	TRI-AAT10-1	chr6:27251864-27251937	chr6	27251864	27251937	II	38	29	38	25	32	30	-0.20482	NO	-0.306103	NO	-0.0473057	NO
chr6_40_tRNAVal_TAC+	TRV-TAC4-1	chr6:27258405-27258477	chr6	27258405	27258477	II	49	1793	61	3379	53	3853	4.52832	O	5.22734	O	5.54792	O
chr6_41_Pseudo_ACT+	TRS-ACT1-1	chr6:27261671-27261744	chr6	27261671	27261744	II	22	2964	19	5929	26	5720	5.84742	O	6.92614	O	6.68199	O
chr6_42_tRNAGln_CTG+	TRQ-CTG5-1	chr6:27263212-27263283	chr6	27263212	27263283	II	67	2619	54	4775	51	4930	4.77132	O	5.838	O	5.93627	O
chr6_43_tRNASer_GCT+	TRS-GCT2-1	chr6:27265775-27265856	chr6	27265775	27265856	II	28	3843	29	7472	50	6811	6.06125	O	6.99042	O	6.41806	O
chr6_151_tRNAThr_CGT-	TRT-CGT6-1	chr6:27271568-27271639	chr6	27271568	27271639	II	24	1197	12	2882	18	2863	4.50603	O	6.11548	O	5.91339	O
chr6_150_tRNAMet_CAT-	TRX-CAT1-5	chr6:27300764-27300835	chr6	27300764	27300835	II	52	3469	73	7091	50	6786	5.41517	O	6.11136	O	6.41278	O
chr6_149_tRNALys_TTT-	TRK-TTT6-1	chr6:27302769-27302841	chr6	27302769	27302841	II	35	1730	41	4509	48	3756	4.75899	O	5.99841	O	5.60106	O
chr6_44_tRNASer_AGA+	TRS-AGA2-2	chr6:27446591-27446672	chr6	27446591	27446672	II	52	6355	51	11063	44	10675	6.28292	O	7.09751	O	7.17654	O
chr6_45_tRNAAsp_GTC+	TRD-GTC2-6	chr6:27447453-27447524	chr6	27447453	27447524	II	29	5747	39	8816	41	9372	6.61346	O	7.00229	O	7.049	O
chr6_46_tRNASer_AGA+	TRS-AGA2-3	chr6:27463593-27463674	chr6	27463593	27463674	II	72	4294	58	8342	44	8332	5.40573	O	6.57192	O	6.82018	O
chr6_47_tRNASer_AGA+	TRS-AGA2-4	chr6:27470818-27470899	chr6	27470818	27470899	II	21	2059	28	4096	24	4979	5.35617	O	6.15255	O	6.53542	O
chr6_48_tRNAAsp_GTC+	TRD-GTC2-7	chr6:27471523-27471594	chr6	27471523	27471594	II	28	3858	39	6560	45	7040	6.06683	O	6.57754	O	6.55868	O
chr6_148_tRNASer_TGA-	TRS-TGA4-1	chr6:27473607-27473688	chr6	27473607	27473688	II	35	2522	31	5582	43	5681	5.29504	O	6.52356	O	6.2897	O
chr6_49_tRNAGln_CTG+	TRQ-CTG1-2	chr6:27487308-27487379	chr6	27487308	27487379	II	24	5385	44	9056	33	8492	6.64786	O	6.93998	O	7.0797	O
chr6_50_tRNASer_AGA+	TRS-AGA3-1	chr6:27499987-27500068	chr6	27499987	27500068	II	39	447	32	674	39	752	2.78932	O	3.50524	O	3.5025	O
chr6_147_tRNASer_AGA-	TRS-AGA1-1	chr6:27509554-27509635	chr6	27509554	27509635	II	29	1024	21	2114	35	1798	4.15902	O	5.39366	O	4.81368	O
chr6_51_tRNASer_TGA+	TRS-TGA2-1	chr6:27513468-27513549	chr6	27513468	27513549	II	35	1733	53	3587	42	3797	4.76145	O	5.44554	O	5.73207	O
chr6_146_tRNAGln_CTG-	TRQ-CTG2-1	chr6:27515531-27515602	chr6	27515531	27515602	II	23	1721	19	3136	19	3051	5.04604	O	6.01374	O	5.97447	O
chr6_145_tRNASer_AGA-	TRS-AGA4-1	chr6:27521192-27521273	chr6	27521192	27521273	II	43	1812	53	4214	53	3973	4.65723	O	5.67617	O	5.59183	O
chr6_52_tRNAArg_TCT_I+	TRR-TCT5-1	chr6:27529963-27530049	chr6	27529963	27530049	II	21	181	8	472	34	405	2.04867	O	3.72362	O	2.76487	O
chr6_53_tRNALys_TTT+	TRK-TTT9-1	chr6:27543846-27543918	chr6	27543846	27543918	II	35	798	48	1583	35	1406	3.67112	O	4.37013	O	4.46547	O
chr6_144_tRNAAsp_GTC-	TRD-GTC3-1	chr6:27551236-27551307	chr6	27551236	27551307	II	12	2317	14	4643	13	4811	5.80428	O	6.7307	O	6.81482	O
chr6_143_tRNALys_TTT-	TRK-TTT4-1	chr6:27559593-27559665	chr6	27559593	27559665	II	41	1919	33	3913	27	3523	4.77877	O	5.9678	O	5.96193	O
chr6_142_tRNAMet_CAT-	TRX-CAT1-6	chr6:27560600-27560671	chr6	27560600	27560671	II	33	4089	54	7580	58	7498	6.0308	O	6.50136	O	6.41862	O
chr6_141_tRNALeu_CAA_I-	TRL-CAA3-1	chr6:27570348-27570454	chr6	27570348	27570454	II	43	358	48	925	55	717	2.41009	O	3.61395	O	3.13557	O
chr6_140_tRNALeu_CAA_I-	TRL-CAA2-1	chr6:27573417-27573524	chr6	27573417	27573524	II	38	2174	44	4815	52	3899	5.01845	O	6.03283	O	5.58239	O
chr6_54_tRNAThr_CGT+	TRT-CGT5-1	chr6:27586135-27586208	chr6	27586135	27586208	II	56	850	43	1967	50	1824	3.35509	O	4.77379	O	4.5345	O
chr6_55_tRNAIle_TAT_I+	TRI-TAT2-3	chr6:27599200-27599293	chr6	27599200	27599293	II	38	318	74	904	48	678	2.35548	O	3.16684	O	3.1822	O
chr6_139_tRNAVal_AAC-	TRV-AAC3-1	chr6:27618707-27618779	chr6	27618707	27618779	II	27	2311	22	3960	27	5484	5.36002	O	6.26173	O	6.59599	O
chr6_56_tRNAPhe_GAA+	TRF-GAA7-1	chr6:27632545-27632620	chr6	27632545	27632620	II	22	30	31	59	29	38	0.206451	NO	0.544996	NO	0.20482	NO
chr6_57_tRNAIle_AAT+	TRI-AAT8-1	chr6:27636362-27636435	chr6	27636362	27636435	II	43	2953	32	6166	34	6453	5.35272	O	6.64293	O	6.66245	O
chr6_138_tRNAArg_ACG-	TRR-ACG2-4	chr6:27638344-27638416	chr6	27638344	27638416	II	18	1790	26	3801	30	3617	5.24476	O	6.09615	O	5.9256	O
chr6_137_tRNASer_CGA-	TRS-CGA3-1	chr6:27640229-27640310	chr6	27640229	27640310	II	28	700	32	1006	30	1162	3.65377	O	4.06261	O	4.31228	O
chr6_136_tRNAVal_AAC-	TRV-AAC4-1	chr6:27648885-27648957	chr6	27648885	27648957	II	42	81	53	158	45	108	0.624491	NO	1.17955	NO	0.879706	NO
chr6_58_tRNAVal_CAC+	TRV-CAC12-1	chr6:27650488-27650561	chr6	27650488	27650561	II	35	31	32	39	35	25	-0.0916305	NO	0.154328	NO	-0.241008	NO
chr6_135_tRNAThr_AGT-	TRT-AGT2-2	chr6:27652474-27652547	chr6	27652474	27652547	II	19	1344	43	2778	41	2673	4.80946	O	5.2655	O	5.2506	O
chr6_59_tRNAIle_AAT+	TRI-AAT2-1	chr6:27655967-27656040	chr6	27655967	27656040	II	65	7291	62	13190	46	12289	6.26797	O	7.16687	O	7.34067	O
chr6_134_tRNALeu_TAA-	TRL-TAA2-1	chr6:27688898-27688980	chr6	27688898	27688980	II	28	1758	36	4491	33	4256	4.94615	O	6.09803	O	6.08814	O
chr6_60_tRNAThr_AGT+	TRT-AGT4-1	chr6:27694473-27694546	chr6	27694473	27694546	II	24	797	24	1960	35	1939	3.93686	O	5.20367	O	4.92088	O
chr6_133_tRNAVal_CAC-	TRV-CAC7-1	chr6:27696327-27696399	chr6	27696327	27696399	II	14	31	29	39	32	31	0.471306	NO	0.225881	NO	-0.023459	NO
chr6_132_tRNAVal_AAC-	TRV-AAC1-5	chr6:27721179-27721251	chr6	27721179	27721251	II	26	6164	28	8171	30	8468	6.7893	O	7.1436	O	7.14602	O
chr6_61_tRNAMet_CAT+	TRX-CAT2-1	chr6:27745664-27745735	chr6	27745664	27745735	II	14	1268	26	2882	14	3223	4.88264	O	5.70044	O	6.20812	O
chr6_131_tRNAGln_CTG-	TRQ-CTG6-1	chr6:27759135-27759206	chr6	27759135	27759206	II	37	5015	24	9254	28	9014	6.23455	O	7.42564	O	7.28476	O
chr6_130_tRNAGln_TTG-	TRQ-TTG3-3	chr6:27763640-27763711	chr6	27763640	27763711	II	37	4972	23	6878	16	6367	6.2222	O	7.02613	O	7.11962	O
chr6_129_tRNAMet_CAT-	TRX-CAT1-7	chr6:27870271-27870342	chr6	27870271	27870342	II	37	8196	39	11858	35	10320	6.93989	O	7.42869	O	7.31498	O
chr6_128_tRNAGly_GCC-	TRG-GCC2-3	chr6:27870686-27870756	chr6	27870686	27870756	II	36	10118	42	13964	30	12848	7.26451	O	7.6026	O	7.74573	O
chr6_62_tRNASer_GCT+	TRS-GCT5-1	chr6:28180815-28180896	chr6	28180815	28180896	II	25	6692	31	11526	35	10009	6.93332	O	7.56562	O	7.27096	O
chr6_127_tRNAThr_TGT-	TRT-TGT1-1	chr6:28442329-28442402	chr6	28442329	28442402	II	32	4051	27	8113	34	6798	6.04051	O	7.15845	O	6.73725	O
chr6_126_tRNALeu_AAG-	TRL-AAG4-1	chr6:28446400-28446481	chr6	28446400	28446481	II	35	114	32	390	45	321	1.14756	O	2.76005	O	2.22651	O
chr6_125_tRNAThr_CGT-	TRT-CGT1-1	chr6:28456770-28456843	chr6	28456770	28456843	II	19	2727	19	5849	25	6010	5.81417	O	6.90665	O	6.77897	O
chr6_63_tRNAIle_TAT_I+	TRI-TAT3-1	chr6:28505367-28505460	chr6	28505367	28505460	II	38	258	52	628	44	588	2.08246	O	3.00439	O	3.06201	O
chr6_124_tRNAArg_TCG-	TRR-TCG5-1	chr6:28510891-28510963	chr6	28510891	28510963	II	39	2986	33	6193	45	5724	5.4499	O	6.62611	O	6.26153	O
chr6_64_tRNAGln_TTG+	TRQ-TTG2-1	chr6:28557156-28557227	chr6	28557156	28557227	II	58	2903	39	6506	53	6632	5.05873	O	6.56567	O	6.3267	O
chr6_123_tRNASer_GCT-	TRS-GCT4-1	chr6:28565117-28565198	chr6	28565117	28565198	II	34	1317	49	3831	29	3602	4.39553	O	5.61098	O	5.94391	O
chr6_65_tRNAAla_AGC+	TRA-AGC3-1	chr6:28574933-28575004	chr6	28574933	28575004	II	26	3448	36	7130	36	7321	5.95669	O	6.76135	O	6.79933	O
chr6_122_Pseudo_TGC-	TRA-TGC9-1	chr6:28601859-28601930	chr6	28601859	28601930	II	12	67	16	225	28	209	1.2076	O	2.47079	O	2.04289	O
chr6_66_tRNAAla_TGC+	TRA-TGC2-1	chr6:28611222-28611293	chr6	28611222	28611293	II	13	1073	11	2460	13	2289	4.68095	O	5.92438	O	5.75302	O
chr6_121_tRNAThr_CGT-	TRT-CGT3-1	chr6:28615984-28616057	chr6	28615984	28616057	II	18	3582	17	6098	21	6106	6.23362	O	7.02661	O	6.91066	O
chr6_120_tRNAAla_AGC-	TRA-AGC4-1	chr6:28626014-28626085	chr6	28626014	28626085	II	19	4346	19	6229	27	5243	6.48069	O	6.99701	O	6.53152	O
chr6_119_tRNAAla_CGC-	TRA-CGC2-1	chr6:28641613-28641684	chr6	28641613	28641684	II	31	4824	38	9003	53	8458	6.31422	O	7.05353	O	6.67617	O
chr6_118_Pseudo_TTT-	TRK-TTT13-1	chr6:28660987-28661060	chr6	28660987	28661060	II	21	910	64	2062	49	1918	4.20409	O	4.47608	O	4.624	O
chr6_117_tRNAAla_CGC-	TRA-CGC5-1	chr6:28663709-28663780	chr6	28663709	28663780	II	25	631	17	1133	22	1047	3.58715	O	4.62905	O	4.37236	O
chr6_67_tRNAAla_AGC+	TRA-AGC5-1	chr6:28678366-28678437	chr6	28678366	28678437	II	25	1552	41	3415	45	3319	4.84617	O	5.60054	O	5.4807	O
chr6_68_tRNAAla_AGC+	TRA-AGC7-1	chr6:28687481-28687552	chr6	28687481	28687552	II	4	708	2	1838	10	1758	4.44001	O	5.86728	O	5.4822	O
chr6_69_tRNAThr_AGT+	TRT-AGT3-1	chr6:28693795-28693868	chr6	28693795	28693868	II	27	1041	34	2096	36	2392	4.23185	O	5.05393	O	5.19759	O
chr6_116_Pseudo_GAA-	TRF-GAA11-1	chr6:28694855-28694927	chr6	28694855	28694927	II	35	99	17	253	22	214	0.988859	NO	2.59007	O	2.2303	O
chr6_70_tRNAAla_CGC+	TRA-CGC4-1	chr6:28697092-28697163	chr6	28697092	28697163	II	24	3780	24	6548	28	6472	6.14069	O	6.92855	O	6.80869	O
chr6_115_tRNAVal_AAC-	TRV-AAC6-1	chr6:28703206-28703277	chr6	28703206	28703277	II	31	1181	41	3330	37	2606	4.31125	O	5.5645	O	5.29805	O
chr6_114_tRNAArg_CCG-	TRR-CCG1-1	chr6:28710729-28710801	chr6	28710729	28710801	II	14	947	26	1883	13	2341	4.47278	O	5.09427	O	5.78502	O
chr6_71_tRNALys_TTT+	TRK-TTT7-1	chr6:28715521-28715593	chr6	28715521	28715593	II	29	2021	28	4254	16	4205	5.11947	O	6.20676	O	6.52458	O
chr6_113_tRNAAla_TGC-	TRA-TGC6-1	chr6:28726141-28726212	chr6	28726141	28726212	II	33	1108	28	3469	31	2901	4.175	O	5.91475	O	5.58644	O
chr6_112_tRNAPhe_GAA-	TRF-GAA6-1	chr6:28731374-28731447	chr6	28731374	28731447	II	27	26	26	38	23	37	-0.0255351	NO	0.280108	NO	0.338169	NO
chr6_72_tRNAPhe_GAA+	TRF-GAA5-1	chr6:28732164-28732236	chr6	28732164	28732236	II	38	72	39	258	22	173	0.584963	NO	2.0614	O	1.9649	O
chr6_111_Pseudo_AGC-	TRA-AGC23-1	chr6:28746544-28746615	chr6	28746544	28746615	II	28	103	24	142	43	175	1.1973	O	1.67138	O	1.48966	O
chr6_110_tRNAAla_TGC-	TRA-TGC1-1	chr6:28757547-28757618	chr6	28757547	28757618	II	46	1982	31	4727	24	4259	4.72649	O	6.2851	O	6.31154	O
chr6_109_tRNAPhe_GAA-	TRF-GAA1-1	chr6:28758499-28758571	chr6	28758499	28758571	II	33	855	26	2215	38	1671	3.81225	O	5.32514	O	4.6447	O
chr6_108_tRNAAla_AGC-	TRA-AGC1-1	chr6:28763741-28763812	chr6	28763741	28763812	II	63	5879	62	10978	52	9730	5.98954	O	6.9027	O	6.89511	O
chr6_107_tRNAAla_TGC-	TRA-TGC7-1	chr6:28770577-28770647	chr6	28770577	28770647	II	50	1413	29	3653	37	3532	4.17293	O	5.96402	O	5.73238	O
chr6_106_tRNAPhe_GAA-	TRF-GAA3-1	chr6:28775610-28775682	chr6	28775610	28775682	II	44	3615	33	6948	43	6515	5.62225	O	6.79132	O	6.48635	O
chr6_105_tRNAAla_AGC-	TRA-AGC6-1	chr6:28779849-28779920	chr6	28779849	28779920	II	37	1941	34	4637	41	4028	4.87862	O	6.18828	O	5.83681	O
chr6_104_tRNAAla_TGC-	TRA-TGC5-1	chr6:28785012-28785083	chr6	28785012	28785083	II	32	1814	42	4111	30	4055	4.89443	O	5.84584	O	6.08923	O
chr6_103_tRNAPhe_GAA-	TRF-GAA4-1	chr6:28791093-28791166	chr6	28791093	28791166	II	18	91	17	366	22	226	1.3339	O	3.07477	O	2.29956	O
chr6_102_tRNAAla_AGC-	TRA-AGC2-1	chr6:28806221-28806292	chr6	28806221	28806292	II	26	4685	34	6622	26	6538	6.39569	O	6.69957	O	6.87388	O
chr6_101_tRNAAla_AGC-	TRA-AGC2-2	chr6:28831462-28831533	chr6	28831462	28831533	II	52	7038	68	10539	46	9832	6.42953	O	6.75284	O	7.01974	O
chr6_73_tRNAArg_CCG+	TRR-CCG1-2	chr6:28849165-28849237	chr6	28849165	28849237	II	28	5918	22	8783	34	8518	6.68021	O	7.40498	O	7.06137	O
chr6_100_tRNALeu_CAA_I-	TRL-CAA1-1	chr6:28864000-28864105	chr6	28864000	28864105	II	36	10090	59	15321	30	12532	7.26053	O	7.43031	O	7.70989	O
chr6_74_tRNALeu_CAA_I+	TRL-CAA1-2	chr6:28908830-28908934	chr6	28908830	28908934	II	38	8171	61	13585	41	12237	6.91412	O	7.22511	O	7.43275	O
chr6_99_tRNAGln_CTG-	TRQ-CTG1-3	chr6:28909378-28909449	chr6	28909378	28909449	II	33	4230	46	6553	38	6804	6.07936	O	6.4366	O	6.65105	O
chr6_98_tRNALeu_AAG-	TRL-AAG2-2	chr6:28911399-28911480	chr6	28911399	28911480	II	63	4117	68	8090	59	7601	5.47869	O	6.37255	O	6.42192	O
chr6_75_tRNAMet_CAT+	TRM-CAT3-1	chr6:28912352-28912424	chr6	28912352	28912424	II	22	7535	44	11648	44	10328	7.18468	O	7.30205	O	7.129	O
chr6_76_tRNALys_TTT+	TRK-TTT3-3	chr6:28918806-28918878	chr6	28918806	28918878	II	31	4412	22	7543	30	7664	6.18626	O	7.18621	O	7.00263	O
chr6_97_tRNAMet_CAT-	TRM-CAT3-2	chr6:28921042-28921114	chr6	28921042	28921114	II	24	5437	27	8214	34	8029	6.66165	O	7.17624	O	6.97639	O
chr6_96_tRNAPhe_GAA-	TRF-GAA1-2	chr6:28949449-28949521	chr6	28949449	28949521	II	25	3464	19	6622	32	6896	5.9893	O	7.08486	O	6.80361	O
chr6_77_tRNAGlu_CTC+	TRE-CTC1-6	chr6:28949976-28950047	chr6	28949976	28950047	II	39	8039	29	10824	39	10313	6.86965	O	7.5233	O	7.22784	O
chr6_78_tRNALeu_AAG+	TRL-AAG3-1	chr6:28956779-28956860	chr6	28956779	28956860	II	29	80	33	253	41	225	0.898717	NO	2.16738	O	1.84461	O
chr6_79_tRNAGln_TTG+	TRQ-TTG10-1	chr6:37287995-37288067	chr6	37287995	37288067	II	24	36	21	28	21	28	0.289507	NO	0.185556	NO	0.185556	NO
7SK_RNA	RN7SK	chr6:52860417-52860749	chr6	52860417	52860749	III	106	14833	97	19989	89	20345	6.77197	O	7.3004	O	7.41969	O
chr6_95_tRNAAla_AGC-	TRA-AGC22-1	chr6:58141877-58141949	chr6	58141877	58141949	II	42	104	69	313	59	228	0.896164	NO	1.79271	O	1.53549	O
chr6_94_tRNAAla_AGC-	TRA-AGC19-1	chr6:58142589-58142661	chr6	58142589	58142661	II	50	802	46	3050	43	1951	3.37851	O	5.34079	O	4.76219	O
chr6_80_tRNAIle_AAT+	TRI-AAT1-1	chr6:58149254-58149327	chr6	58149254	58149327	II	35	108	33	330	45	262	1.08616	NO	2.51457	O	1.96101	O
chr6_93_tRNAAla_AGC-	TRA-AGC13-2	chr6:58164628-58164700	chr6	58164628	58164700	II	63	283	82	795	52	701	1.75086	O	2.8809	O	3.15618	O
chr6_92_tRNAMet_CAT-	TRM-CAT7-1	chr6:58168492-58168564	chr6	58168492	58168564	II	29	54	28	105	28	86	0.509674	NO	1.21883	O	1	NO
chr6_91_tRNAAla_AGC-	TRA-AGC12-3	chr6:58182679-58182751	chr6	58182679	58182751	II	53	182	67	390	39	413	1.35288	O	2.11433	O	2.68264	O
chr6_90_tRNAAla_AGC-	TRA-AGC17-1	chr6:58187444-58187516	chr6	58187444	58187516	II	46	84	61	255	47	224	0.584963	NO	1.64702	O	1.7219	O
chr6_89_tRNAAla_AGC-	TRA-AGC16-1	chr6:58196623-58196695	chr6	58196623	58196695	II	33	205	52	483	53	553	1.89924	O	2.64526	O	2.81231	O
chr6_81_tRNALeu_TAA+	TRL-TAA5-1	chr6:69914378-69914460	chr6	69914378	69914460	II	14	26	31	19	9	13	0.347923	NO	-0.316027	NO	0.140863	NO
chr6_88_Pseudo_GAA-	TRF-GAA8-1	chr6:79668010-79668082	chr6	79668010	79668082	II	1	14	6	20	10	19	0.505235	NO	0.473931	NO	0.292782	NO
AluJo_SINE_Alu	N/A	chr6:111563459-111563761	chr6	111563459	111563761	II	47	480	36	1214	47	733	2.72757	O	4.23638	O	3.30875	O
chr6_87_tRNAGlu_CTC-	TRE-CTC1-7	chr6:126101393-126101464	chr6	126101393	126101464	II	44	6887	14	9497	15	9260	6.54648	O	7.75837	O	7.68961	O
chr6_82_tRNAGly_GCC+	TRG-GCC6-1	chr6:142578776-142578846	chr6	142578776	142578846	II	69	72	63	65	80	48	0.0430687	NO	0.0306968	NO	-0.495957	NO
chr6_83_tRNALeu_TAA+	TRL-TAA1-1	chr6:144537684-144537766	chr6	144537684	144537766	II	53	8399	64	10773	40	9327	6.66611	O	6.84456	O	7.06255	O
chr6_84_tRNAGln_TTG+	TRQ-TTG4-1	chr6:145503859-145503930	chr6	145503859	145503930	II	37	73	28	130	35	107	0.620411	NO	1.46395	O	1.07566	O
chr6_86_Pseudo_TAC-	NMTRV-TAC1-1	chr6:156869046-156869120	chr6	156869046	156869120	II	35	34	33	37	28	24	-0.0223678	NO	0.0888093	NO	-0.103093	NO
chr6_85_Pseudo_TTC-	TRE-TTC15-1	chr6:163210014-163210082	chr6	163210014	163210082	II	4	14	3	13	12	13	0.371969	NO	0.381871	NO	0.0339473	NO
chr7_26_Pseudo_TTG-	NMTRQ-TTG13-1	chr7:57253980-57254051	chr7	57253980	57254051	II	9	19	2	22	15	21	0.329308	NO	0.70044	NO	0.180572	NO
AluY_SINE_Alu_80572362	N/A	chr7:80572362-80572508	chr7	80572362	80572508	II	18	366	36	1023	35	617	3.04439	O	3.9959	O	3.31525	O
chr7_1_tRNATrp_CCA+	TRW-CCA5-1	chr7:99067307-99067378	chr7	99067307	99067378	II	58	45	48	110	56	101	-0.230613	NO	0.843881	NO	0.607158	NO
chr7_2_tRNAPro_AGG+	TRP-AGG2-3	chr7:128423504-128423575	chr7	128423504	128423575	II	95	8067	115	13053	84	11193	6.01739	O	6.4955	O	6.62128	O
chr7_3_tRNAArg_CCT+	TRR-CCT4-1	chr7:139025446-139025518	chr7	139025446	139025518	II	96	9221	84	12745	64	10681	6.19811	O	6.80815	O	6.83222	O
chr7_4_Pseudo_TTG+	NMTRQ-TTG2-1	chr7:141503357-141503428	chr7	141503357	141503428	II	7	20	16	24	21	28	0.434403	NO	0.231326	NO	0.185556	NO
hY5_RNA	RNY5	chr7:148638579-148638663	chr7	148638579	148638663	III	4	3456	4	5397	14	5366	6.67989	O	7.31848	O	6.93824	O
hY4_RNA	RNY4	chr7:148660406-148660499	chr7	148660406	148660499	III	16	3461	17	5205	26	5032	6.24586	O	6.79938	O	6.49814	O
hY3_RNA	RNY3	chr7:148680846-148680947	chr7	148680846	148680947	III	74	6081	44	9141	45	9498	5.87675	O	6.95341	O	6.98914	O
hY1_RNA	RNY1	chr7:148684228-148684340	chr7	148684228	148684340	III	18	5830	11	7858	28	8523	6.93172	O	7.58789	O	7.20423	O
chr7_5_tRNACys_GCA+	TRC-GCA1-1	chr7:149007281-149007352	chr7	149007281	149007352	II	25	1009	17	2340	28	2110	4.23962	O	5.65608	O	5.20541	O
chr7_6_tRNACys_GCA+	TRC-GCA9-2	chr7:149028220-149028291	chr7	149028220	149028291	II	42	607	52	1072	36	1381	3.14522	O	3.74836	O	4.41811	O
chr7_25_tRNACys_GCA-	TRC-GCA13-1	chr7:149052766-149052837	chr7	149052766	149052837	II	75	329	73	576	55	641	1.77359	O	2.55667	O	2.98078	O
chr7_24_Pseudo_GTA-	TRY-GTA11-1	chr7:149053745-149053820	chr7	149053745	149053820	II	27	18	26	32	23	29	-0.247928	NO	0.146841	NO	0.154723	NO
chr7_23_tRNACys_GCA-	TRC-GCA18-1	chr7:149072850-149072921	chr7	149072850	149072921	II	37	104	48	302	39	253	1	NO	2.08964	O	2.03613	O
chr7_22_tRNACys_GCA-	TRC-GCA10-1	chr7:149074601-149074672	chr7	149074601	149074672	II	41	154	28	388	41	390	1.37381	O	2.84938	O	2.5645	O
chr7_21_tRNACys_GCA-	TRC-GCA11-1	chr7:149112229-149112300	chr7	149112229	149112300	II	44	24	24	67	27	59	-0.454566	NO	0.845025	NO	0.642843	NO
chr7_7_tRNACys_GCA+	TRC-GCA16-1	chr7:149243631-149243702	chr7	149243631	149243702	II	52	65	43	160	36	186	0.212304	NO	1.38003	O	1.71049	O
chr7_8_tRNACys_GCA+	TRC-GCA22-1	chr7:149253802-149253873	chr7	149253802	149253873	II	43	85	49	114	45	141	0.655665	NO	0.866144	NO	1.18903	O
chr7_9_tRNATyr_GTA+	TRY-GTA10-1	chr7:149255133-149255205	chr7	149255133	149255205	II	37	42	49	41	55	50	0.103836	NO	-0.154034	NO	-0.0874628	NO
chr7_10_tRNACys_GCA+	TRC-GCA15-1	chr7:149281816-149281887	chr7	149281816	149281887	II	39	55	58	126	43	111	0.300866	NO	0.825971	NO	0.949727	NO
chr7_20_tRNACys_GCA-	TRC-GCA3-1	chr7:149286164-149286235	chr7	149286164	149286235	II	49	49	61	99	40	129	0	NO	0.503433	NO	1.1836	O
chr7_19_tRNACys_GCA-	TRC-GCA23-1	chr7:149292305-149292376	chr7	149292305	149292376	II	46	60	38	84	44	128	0.243926	NO	0.745427	NO	1.09433	O
chr7_11_tRNACys_GCA+	TRC-GCA20-1	chr7:149295046-149295117	chr7	149295046	149295117	II	54	41	50	101	46	93	-0.24257	NO	0.711495	NO	0.694587	NO
chr7_12_tRNASer_AGA+	TRS-AGA5-1	chr7:149305467-149305538	chr7	149305467	149305538	II	37	103	52	161	47	233	0.989193	NO	1.21988	O	1.77213	O
chr7_18_tRNACys_GCA-	TRC-GCA19-1	chr7:149310156-149310227	chr7	149310156	149310227	II	42	34	68	40	51	42	-0.169925	NO	-0.485427	NO	-0.169925	NO
chr7_13_tRNACys_GCA+	TRC-GCA9-3	chr7:149332778-149332849	chr7	149332778	149332849	II	48	308	34	521	40	727	2.11548	O	3.10591	O	3.43487	O
chr7_17_tRNACys_GCA-	TRC-GCA12-1	chr7:149344046-149344117	chr7	149344046	149344117	II	29	288	34	599	19	657	2.43024	O	3.29692	O	3.80946	O
chr7_14_tRNACys_GCA+	TRC-GCA21-1	chr7:149361915-149361986	chr7	149361915	149361986	II	42	181	37	450	40	441	1.55117	O	2.8408	O	2.7503	O
chr7_16_tRNACys_GCA-	TRC-GCA17-1	chr7:149388272-149388343	chr7	149388272	149388343	II	42	1428	54	3105	37	2983	4.33985	O	5.22193	O	5.4909	O
chr7_15_tRNACys_GCA+	TRC-GCA9-4	chr7:149404760-149404831	chr7	149404760	149404831	II	39	1160	57	2445	46	2657	4.10822	O	4.83027	O	5.14385	O
chr8_1_Pseudo_CTC+	TRE-CTC11-1	chr8:11793380-11793451	chr8	11793380	11793451	II	7	8	14	6	7	11	0.0384741	NO	-0.289507	NO	0.148099	NO
chr8_2_Pseudo_TTT+	TRK-TTT17-1	chr8:18120203-18120272	chr8	18120203	18120272	II	24	29	23	50	33	48	0.127756	NO	0.594008	NO	0.308122	NO
chr8_14_Pseudo_TTG-	NMTRQ-TTG11-1	chr8:32872646-32872717	chr8	32872646	32872717	II	13	17	17	26	12	13	0.128324	NO	0.252766	NO	0.0339473	NO
chr8_13_Pseudo_TAA-	NMTRL-TAA6-1	chr8:47740038-47740112	chr8	47740038	47740112	II	12	27	7	34	20	22	0.440573	NO	0.790547	NO	0.0565835	NO
chr8_3_tRNAGlu_CTC+	TRE-CTC5-1	chr8:59504798-59504868	chr8	59504798	59504868	II	18	22	16	22	30	14	0.115477	NO	0.176878	NO	-0.447459	NO
chr8_12_tRNATyr_GTA_I-	TRY-GTA9-1	chr8:66609532-66609619	chr8	66609532	66609619	II	29	30	52	46	44	33	0.0242475	NO	-0.109624	NO	-0.232173	NO
chr8_4_tRNATyr_GTA_I+	TRY-GTA5-1	chr8:67025602-67025694	chr8	67025602	67025694	II	97	9998	88	15579	94	12706	6.30306	O	7.04745	O	6.68243	O
chr8_5_tRNATyr_GTA_I+	TRY-GTA5-2	chr8:67026223-67026311	chr8	67026223	67026311	II	46	6909	64	13735	51	11800	6.51258	O	7.19413	O	7.19031	O
chr8_6_tRNAAla_AGC+	TRA-AGC8-2	chr8:67026424-67026496	chr8	67026424	67026496	II	64	7108	66	11824	47	10016	6.24672	O	6.94812	O	7.02755	O
chr8_7_Pseudo_CTC+	TRE-CTC14-1	chr8:70072340-70072414	chr8	70072340	70072414	II	21	20	22	16	14	7	-0.0285692	NO	-0.176878	NO	-0.249978	NO
HUERS-P1_LTR_ERV1	N/A	chr8:90416283-90416678	chr8	90416283	90416678	other	42	876	36	2107	40	1455	3.65344	O	5.01698	O	4.40696	O
5S_rRNA-related_8	RN5S@	chr8:93179688-93179778	chr8	93179688	93179778	I	7	15	7	16	25	24	0.2824	NO	0.314109	NO	-0.0264722	NO
chr8_11_tRNASer_AGA-	TRS-AGA2-5	chr8:96281885-96281966	chr8	96281885	96281966	II	75	11345	83	16731	56	12867	6.75933	O	7.21264	O	7.22848	O
chr8_8_tRNAUndet_???+	TRU-NNN2-1	chr8:99153462-99153530	chr8	99153462	99153530	II	31	28	16	33	29	19	-0.0727563	NO	0.453718	NO	-0.267933	NO
chr8_10_tRNAMet_CAT-	TRM-CAT1-1	chr8:124169470-124169542	chr8	124169470	124169542	II	72	10130	129	13296	73	8391	6.63819	O	6.38907	O	6.35328	O
chr8_9_Pseudo_GAA-	TRF-GAA12-1	chr8:124270725-124270797	chr8	124270725	124270797	II	31	25	31	22	14	24	-0.149378	NO	-0.230298	NO	0.295456	NO
chr9_8_tRNAGln_TTG-	NMTRQ-TTG14-1	chr9:5095085-5095156	chr9	5095085	5095156	II	23	24	7	15	14	17	0.026967	NO	0.2824	NO	0.0951572	NO
chr9_7_tRNAHis_GTG-	TRH-GTG1-6	chr9:14433938-14434009	chr9	14433938	14434009	II	22	723	16	1971	22	1555	3.85607	O	5.44294	O	4.92983	O
chr9_1_tRNAMet_CAT+	TRX-CAT3-1	chr9:19403996-19404070	chr9	19403996	19404070	II	47	50	54	43	33	26	0.0551416	NO	-0.202493	NO	-0.169925	NO
RNaseMRP_RNA	RMRP	chr9:35657749-35658014	chr9	35657749	35658014	III	127	22386	138	29893	105	18598	7.15762	O	7.47665	O	7.10837	O
5S_rRNA-related_9	RN5S@	chr9:66458015-66458415	chr9	66458015	66458415	I	232	809	249	1289	166	1423	1.6791	O	2.24111	O	2.89011	O
MIRb_SINE_MIR_75003721	N/A	chr9:75003721-75003918	chr9	75003721	75003918	II	22	217	14	771	15	414	2.24793	O	4.18623	O	3.30256	O
chr9_6_tRNAAsp_GTC-	TRD-GTC4-1	chr9:77517990-77518061	chr9	77517990	77518061	II	34	23	50	26	43	25	-0.27208	NO	-0.514573	NO	-0.408465	NO
chr9_2_tRNAArg_TCG+	TRR-TCG6-1	chr9:112960803-112960875	chr9	112960803	112960875	II	28	99	26	192	32	167	1.15325	O	1.98706	O	1.66786	O
chr9_3_tRNATrp_CCA_I+	TRW-CCA6-1	chr9:115616989-115617087	chr9	115616989	115617087	II	35	47	51	50	55	29	0.244419	NO	-0.0179219	NO	-0.526748	NO
chr9_5_tRNAGln_CTG-	TRQ-CTG15-1	chr9:126655522-126655594	chr9	126655522	126655594	II	26	57	29	134	35	155	0.635589	NO	1.47491	O	1.50901	O
chr9_4_tRNAArg_TCT_I-	TRR-TCT3-1	chr9:131102355-131102445	chr9	131102355	131102445	II	79	354	73	558	51	792	1.81678	O	2.51317	O	3.34314	O
RNU6ATAC	RNU6ATAC	chr9:137029561-137029686	chr9	137029561	137029686	III	37	5258	56	8524	45	7614	6.30242	O	6.63612	O	6.67129	O
chr10_6_tRNAVal_TAC-	TRV-TAC3-1	chr10:5895674-5895746	chr10	5895674	5895746	II	15	443	18	697	12	808	3.39384	O	3.92085	O	4.31849	O
chr10_5_Pseudo_CTG-	NMTRQ-CTG1-1	chr10:20036608-20036682	chr10	20036608	20036682	II	12	19	16	21	16	17	0.222392	NO	0.148863	NO	0.0310269	NO
chr10_4_tRNAAsn_GTT-	TRN-GTT2-3	chr10:22518438-22518511	chr10	22518438	22518511	II	52	7157	51	11381	51	10813	6.45362	O	7.13829	O	7.06463	O
chr10_1_Pseudo_GGG+	TRP-GGG1-1	chr10:22852579-22852651	chr10	22852579	22852651	II	13	24	28	26	19	30	0.328623	NO	-0.0506261	NO	0.292181	NO
MIR_SINE_MIR_25183668	N/A	chr10:25183668-25183785	chr10	25183668	25183785	II	63	657	62	995	81	1100	2.88501	O	3.47785	O	3.34769	O
chr10_3_Pseudo_CAA-	TRL-CAA7-1	chr10:34591416-34591483	chr10	34591416	34591483	II	37	34	34	48	37	43	-0.0660892	NO	0.285402	NO	0.123735	NO
AluSx_SINE_Alu_50595434	N/A	chr10:50595434-50595544	chr10	50595434	50595544	II	62	566	62	1303	53	1225	2.69561	O	3.8569	O	3.91843	O
chr10_2_tRNASer_TGA+	TRS-TGA1-1	chr10:69524261-69524342	chr10	69524261	69524342	II	55	7579	76	11213	56	9297	6.4841	O	6.72882	O	6.76093	O
MIR_SINE_MIR_103806446	N/A	chr10:103806446-103806520	chr10	103806446	103806520	II	61	355	48	805	38	534	2.08092	O	3.42023	O	3.05209	O
chr11_1_tRNALeu_CAA+	TRL-CAA5-1	chr11:9296790-9296863	chr11	9296790	9296863	II	26	28	21	26	16	27	0.0506261	NO	0.13493	NO	0.309328	NO
OTHER1_RP3TR1	N/A	chr11:35548169-35548261	chr11	35548169	35548261	other	46	5193	31	11866	35	8819	6.10274	O	7.60745	O	7.08893	O
chr11_19_tRNATrp_CCA-	TRW-CCA7-1	chr11:45290200-45290273	chr11	45290200	45290273	II	54	50	52	40	43	53	-0.0703893	NO	-0.228269	NO	0.185215	NO
chr11_18_tRNAAla_TGC-	TRA-TGC8-1	chr11:50233879-50233950	chr11	50233879	50233950	II	19	19	33	21	21	22	0	NO	-0.304855	NO	0.0280144	NO
chr11_2_tRNALys_CTT+	TRK-CTT15-1	chr11:51359900-51359972	chr11	51359900	51359972	II	0	0	0	0	0	0	0	NO	0	NO	0	NO
chr11_17_tRNAVal_TAC-	TRV-TAC1-1	chr11:59318102-59318174	chr11	59318102	59318174	II	82	11415	74	19523	70	15340	6.67507	O	7.55466	O	7.26397	O
chr11_16_tRNAVal_TAC-	TRV-TAC2-1	chr11:59318460-59318532	chr11	59318460	59318532	II	77	9248	79	16742	78	14013	6.43813	O	7.26558	O	7.02268	O
chr11_3_tRNAArg_TCT_I+	TRR-TCT3-2	chr11:59318767-59318852	chr11	59318767	59318852	II	62	5577	59	11187	63	10503	5.92945	O	6.97767	O	6.82347	O
chr11_4_tRNALeu_TAA+	TRL-TAA3-1	chr11:59319228-59319310	chr11	59319228	59319310	II	33	5245	27	8314	27	8298	6.38768	O	7.19363	O	7.19086	O
chr11_5_tRNALys_TTT+	TRK-TTT5-1	chr11:59323902-59323974	chr11	59323902	59323974	II	44	4657	39	7293	36	7722	5.985	O	6.72969	O	6.87596	O
chr11_15_tRNAPhe_GAA-	TRF-GAA1-3	chr11:59324970-59325042	chr11	59324970	59325042	II	48	4236	51	8171	48	8125	5.77327	O	6.66173	O	6.70807	O
chr11_14_tRNALys_TTT-	TRK-TTT3-4	chr11:59327808-59327880	chr11	59327808	59327880	II	55	5842	54	8440	49	8145	6.11025	O	6.65583	O	6.69322	O
chr11_13_tRNAPhe_GAA-	TRF-GAA2-1	chr11:59333853-59333925	chr11	59333853	59333925	II	43	7475	51	12982	47	9744	6.68381	O	7.32771	O	6.98795	O
chr11_6_Pseudo_TGC+	TRA-TGC10-1	chr11:60763508-60763577	chr11	60763508	60763577	II	82	48	84	44	63	47	-0.521953	NO	-0.623437	NO	-0.272372	NO
chr11_7_Pseudo_CCT+	TRR-CCT9-1	chr11:63661767-63661835	chr11	63661767	63661835	II	32	29	46	46	44	35	-0.0715533	NO	0	NO	-0.187086	NO
chr11_8_tRNASer_GCT+	TRS-GCT3-1	chr11:66115591-66115672	chr11	66115591	66115672	II	64	9009	86	13990	56	12721	6.58736	O	6.91722	O	7.21206	O
tRNA-derived	N/A	chr11:68227589-68227681	chr11	68227589	68227681	II	62	5549	69	9756	53	9787	5.92223	O	6.62715	O	6.88603	O
AluY_SINE_74760232	N/A	chr11:75082304-75082584	chr11	75082304	75082584	II	57	33	72	40	48	57	-0.465664	NO	-0.543142	NO	0.157541	NO
chr11_9_tRNAPro_AGG+	TRP-AGG2-4	chr11:75946557-75946628	chr11	75946557	75946628	II	76	9980	76	13565	58	12611	6.56123	O	7.00287	O	7.16639	O
chr11_12_tRNAPro_TGG-	TRP-TGG2-1	chr11:75946869-75946940	chr11	75946869	75946940	II	61	7727	73	10517	81	9714	6.41349	O	6.67804	O	6.45588	O
chr11_10_tRNASer_AGA+	TRS-AGA6-1	chr11:109036039-109036120	chr11	109036039	109036120	II	38	96	43	145	53	126	0.889817	NO	1.26139	O	0.910363	NO
chr11_11_tRNALys_TTT+	TRK-TTT2-1	chr11:122430655-122430727	chr11	122430655	122430727	II	36	752	32	1157	40	1551	3.56663	O	4.25891	O	4.49734	O
chr12_1_tRNALys_TTT+	TRK-TTT11-1	chr12:27843306-27843378	chr12	27843306	27843378	II	42	51	29	44	36	50	0.169925	NO	0.32681	NO	0.277534	NO
AluY_SINE_Alu_39162319	N/A	chr12:39162319-39162611	chr12	39162319	39162611	II	12	21	12	14	11	17	0.280108	NO	0.0671142	NO	0.197037	NO
chr12_16_Pseudo_TTG-	NMTRQ-TTG6-1	chr12:50211190-50211264	chr12	50211190	50211264	II	9	25	7	15	10	16	0.495957	NO	0.2824	NO	0.201634	NO
chr12_2_tRNASer_CGA+	TRS-CGA4-1	chr12:56584148-56584229	chr12	56584148	56584229	II	96	6888	88	10065	67	9114	5.77886	O	6.41871	O	6.5587	O
chr12_3_tRNAGln_CTG+	TRQ-CTG12-1	chr12:74851182-74851254	chr12	74851182	74851254	II	22	54	12	111	17	123	0.691878	NO	1.74723	O	1.7028	O
AluSp_SINE_Alu_87551831	N/A	chr12:87551831-87552137	chr12	87551831	87552137	II	54	666	44	1571	59	1268	3.05063	O	4.4353	O	3.86634	O
chr12_4_tRNAAsp_GTC+	TRD-GTC2-8	chr12:96429799-96429870	chr12	96429799	96429870	II	48	10235	59	13492	52	12689	7.04004	O	7.24729	O	7.27715	O
chr12_15_Pseudo_TTG-	TRQ-TTG9-1	chr12:97490691-97490764	chr12	97490691	97490764	II	15	18	14	24	17	28	0.0931094	NO	0.295456	NO	0.303392	NO
chr12_5_tRNAAsp_GTC+	TRD-GTC1-1	chr12:98897281-98897352	chr12	98897281	98897352	II	46	4481	51	6473	44	7058	5.8913	O	6.32704	O	6.58171	O
chr12_6_tRNATrp_CCA+	TRW-CCA4-1	chr12:98898030-98898101	chr12	98898030	98898101	II	33	5916	38	8977	50	8121	6.56042	O	7.04937	O	6.67083	O
5S_rRNA-related_10	RN5S@	chr12:104519013-104519103	chr12	104519013	104519103	I	52	29	42	38	33	40	-0.474909	NO	-0.0824622	NO	0.152003	NO
chr12_14_Pseudo_CTC-	TRE-CTC16-1	chr12:114386545-114386617	chr12	114386545	114386617	II	67	47	73	43	48	45	-0.333126	NO	-0.496676	NO	-0.0565835	NO
chr12_7_tRNAAsp_GTC+	TRD-GTC8-1	chr12:122860924-122860994	chr12	122860924	122860994	II	37	34	49	31	49	25	-0.0660892	NO	-0.373043	NO	-0.522421	NO
chr12_13_tRNAAla_TGC-	TRA-TGC3-2	chr12:125406301-125406372	chr12	125406301	125406372	II	29	7515	42	12020	69	10334	6.99866	O	7.38682	O	6.70994	O
chr12_12_tRNAAsp_GTC-	TRD-GTC2-9	chr12:125411891-125411962	chr12	125411891	125411962	II	58	6816	42	9651	66	9228	6.28161	O	7.07102	O	6.59152	O
chr12_11_tRNAPhe_GAA-	TRF-GAA1-4	chr12:125412389-125412461	chr12	125412389	125412461	II	74	7505	61	10119	91	9708	6.17895	O	6.80126	O	6.33055	O
chr12_10_tRNAAsp_GTC-	TRD-GTC2-10	chr12:125424193-125424264	chr12	125424193	125424264	II	85	12089	102	18578	69	16718	6.71949	O	7.13924	O	7.40234	O
chr12_8_tRNAAla_TGC+	TRA-TGC4-1	chr12:125424512-125424583	chr12	125424512	125424583	II	84	10068	124	15419	70	12329	6.46889	O	6.64844	O	6.94942	O
chr12_9_Pseudo_AAT+	TRI-AAT11-1	chr12:129716198-129716272	chr12	129716198	129716272	II	24	28	34	22	22	22	0.103093	NO	-0.29956	NO	0	NO
chr13_7_tRNAAsn_GTT-	TRN-GTT2-4	chr13:31248101-31248174	chr13	31248101	31248174	II	34	7519	44	13460	39	10884	6.88207	O	7.51015	O	7.30537	O
PDS5B_Intronic_AluSx	N/A	chr13:33230740-33231112	chr13	33230740	33231112	II	51	326	51	582	51	442	2.13588	O	2.91754	O	2.54279	O
chr13_6_Pseudo_TTG-	NMTRQ-TTG10-1	chr13:36639747-36639818	chr13	36639747	36639818	II	8	9	11	16	13	18	0.0374747	NO	0.16601	NO	0.158698	NO
chr13_5_tRNAGlu_TTC-	TRE-TTC1-2	chr13:41634874-41634945	chr13	41634874	41634945	II	77	3535	66	6579	36	6097	5.05822	O	6.10525	O	6.53657	O
chr13_4_tRNAGlu_CTC-	TRE-CTC3-1	chr13:42030061-42030132	chr13	42030061	42030132	II	64	190	69	468	53	418	1.22677	O	2.33065	O	2.43232	O
chr13_3_tRNAGlu_TTC-	TRE-TTC2-1	chr13:45492062-45492133	chr13	45492062	45492133	II	75	13168	113	17829	87	13448	6.97379	O	6.96449	O	6.84795	O
chr13_2_Pseudo_CTC-	TRE-CTC4-1	chr13:58458550-58458621	chr13	58458550	58458621	II	6	14	8	13	11	14	0.289507	NO	0.178337	NO	0.10188	NO
chr13_1_tRNAPhe_GAA-	TRF-GAA1-5	chr13:95201904-95201976	chr13	95201904	95201976	II	68	7004	87	10452	51	8891	6.16542	O	6.48526	O	6.78314	O
RNaseP_RNA	RPPH1	chr14:20811230-20811570	chr14	20811230	20811570	III	95	3777	82	5849	58	5848	4.92865	O	5.714	O	6.06168	O
chr14_23_tRNAPro_AGG-	TRP-AGG2-5	chr14:21077495-21077566	chr14	21077495	21077566	II	28	4762	36	7339	51	7406	6.36843	O	6.80286	O	6.52046	O
chr14_1_tRNALeu_AAG+	TRL-AAG2-3	chr14:21078291-21078372	chr14	21078291	21078372	II	56	9753	43	14161	55	10930	6.8298	O	7.60286	O	7.01057	O
chr14_22_tRNAPro_AGG-	TRP-AGG2-6	chr14:21081560-21081631	chr14	21081560	21081631	II	79	8990	77	14050	67	12822	6.37073	O	7.03989	O	7.04979	O
chr14_21_tRNAThr_TGT-	TRT-TGT3-1	chr14:21081949-21082021	chr14	21081949	21082021	II	72	6547	63	10021	50	8034	6.01079	O	6.75589	O	6.65535	O
chr14_2_tRNALeu_TAG+	TRL-TAG2-1	chr14:21093529-21093610	chr14	21093529	21093610	II	53	7300	42	12719	39	11333	6.46456	O	7.46817	O	7.36353	O
tRNA-Tyr-TAC_tRNA_tRNA	N/A	chr14:21098590-21098668	chr14	21098590	21098668	II	44	442	38	1104	51	826	2.67319	O	4.05974	O	3.40162	O
chr14_20_tRNAThr_TGT-	TRT-TGT4-1	chr14:21099319-21099391	chr14	21099319	21099391	II	16	2034	26	3629	18	3469	5.48767	O	6.02988	O	6.18776	O
chr14_3_tRNAPro_TGG+	TRP-TGG1-1	chr14:21101165-21101236	chr14	21101165	21101236	II	28	1718	46	3160	23	3184	4.91351	O	5.39141	O	5.92223	O
chr14_19_tRNATyr_GTA_I-	TRY-GTA5-3	chr14:21121258-21121351	chr14	21121258	21121351	II	66	1119	97	3213	79	2125	3.5812	O	4.67443	O	4.30529	O
chr14_18_tRNATyr_GTA_I-	TRY-GTA4-1	chr14:21125623-21125716	chr14	21125623	21125716	II	73	481	91	1205	80	892	2.31068	O	3.35143	O	3.06726	O
chr14_17_tRNATyr_GTA_I-	TRY-GTA7-1	chr14:21128117-21128210	chr14	21128117	21128210	II	48	126	61	296	41	258	1	NO	1.84093	O	2.02018	O
chr14_16_tRNATyr_GTA_I-	TRY-GTA5-4	chr14:21131351-21131444	chr14	21131351	21131444	II	81	502	82	1422	54	1048	2.26087	O	3.69647	O	3.68182	O
chr14_15_Pseudo_TAG-	TRL-TAG4-1	chr14:21145178-21145259	chr14	21145178	21145259	II	38	50	44	35	32	38	0.234465	NO	-0.187086	NO	0.133267	NO
chr14_4_tRNAThr_TGT+	TRT-TGT5-1	chr14:21149849-21149921	chr14	21149849	21149921	II	36	4595	49	7246	37	7124	6.13084	O	6.52515	O	6.73845	O
chr14_5_tRNATyr_GTA_I+	TRY-GTA5-5	chr14:21151432-21151520	chr14	21151432	21151520	II	77	7020	67	13570	89	11450	6.04194	O	7.13141	O	6.59202	O
chr14_6_tRNAPro_TGG+	TRP-TGG3-2	chr14:21152175-21152246	chr14	21152175	21152246	II	51	5184	66	7271	44	6907	6.00832	O	6.24892	O	6.55064	O
chr14_7_tRNAArg_ACG+	TRR-ACG1-3	chr14:23398910-23398982	chr14	23398910	23398982	II	63	8035	57	11245	50	10340	6.4383	O	7.0179	O	7.0182	O
chr14_14_tRNAGlu_TTC-	TRE-TTC11-1	chr14:32236816-32236886	chr14	32236816	32236886	II	34	19	39	26	60	33	-0.38529	NO	-0.30117	NO	-0.514573	NO
U6-7	RNU6-7	chr14:32671250-32671356	chr14	32671250	32671356	III	60	888	78	1073	62	1429	3.3505	O	3.35233	O	3.9872	O
U6-8	RNU6-8	chr14:32672369-32672475	chr14	32672369	32672475	III	65	6008	82	7446	54	8960	5.99	O	6.0607	O	6.74179	O
RN7SL1	RN7SL1	chr14:50053297-50053596	chr14	50053297	50053596	mixed	121	16641	97	24870	108	24746	6.78665	O	7.61517	O	7.48813	O
RN7SL3	RN7SL3	chr14:50320327-50320727	chr14	50320327	50320727	mixed	74	783	83	1272	59	1367	2.96667	O	3.52633	O	3.97238	O
RN7SL2	RN7SL2	chr14:50329268-50329567	chr14	50329268	50329567	mixed	117	16446	119	28067	100	25989	6.80841	O	7.55896	O	7.64491	O
chr14_13_tRNALys_CTT-	TRK-CTT1-1	chr14:58706613-58706685	chr14	58706613	58706685	II	8	6914	22	9299	19	9164	7.51362	O	7.48707	O	7.55177	O
chr14_8_tRNACys_GCA+	TRC-GCA8-1	chr14:73429679-73429750	chr14	73429679	73429750	II	18	2194	52	4618	39	4016	5.53398	O	5.82484	O	5.87376	O
chr14_12_Pseudo_TTT-	TRK-TTT14-1	chr14:74055529-74055601	chr14	74055529	74055601	II	22	85	32	178	34	121	1.14505	O	1.74624	O	1.2384	O
chr14_11_Pseudo_CTA-	TR*-CTA3-1	chr14:78700838-78700910	chr14	78700838	78700910	II	28	33	28	33	24	31	0.119299	NO	0.119299	NO	0.17585	NO
chr14_9_tRNAAla_AGC+	TRA-AGC15-1	chr14:89445442-89445514	chr14	89445442	89445514	II	18	194	7	517	24	444	2.22239	O	3.88594	O	3.13386	O
chr14_10_tRNAIle_AAT+	TRI-AAT5-4	chr14:102783429-102783502	chr14	102783429	102783502	II	66	6134	78	10210	41	9899	6.00469	O	6.56704	O	7.12769	O
chr15_11_tRNAGlu_TTC-	TRE-TTC2-2	chr15:26327381-26327452	chr15	26327381	26327452	II	33	1092	31	1551	43	1472	4.15458	O	4.69588	O	4.36284	O
chr15_10_tRNASer_GCT-	TRS-GCT4-2	chr15:40886023-40886104	chr15	40886023	40886104	II	42	10061	57	13522	51	11564	7.13086	O	7.28327	O	7.16124	O
chr15_9_tRNAHis_GTG-	TRH-GTG1-7	chr15:45490804-45490875	chr15	45490804	45490875	II	74	8586	59	12679	54	11115	6.37236	O	7.15783	O	7.05179	O
chr15_8_tRNAHis_GTG-	TRH-GTG1-8	chr15:45492611-45492682	chr15	45492611	45492682	II	72	13490	86	19502	73	13987	7.05038	O	7.39557	O	7.08839	O
chr15_1_tRNAHis_GTG+	TRH-GTG1-9	chr15:45493349-45493420	chr15	45493349	45493420	II	76	6832	53	12240	42	9917	6.01649	O	7.20781	O	7.11012	O
chr15_7_tRNAGln_CTG-	TRQ-CTG1-4	chr15:66161400-66161471	chr15	66161400	66161471	II	63	9278	78	11628	67	10288	6.6451	O	6.75415	O	6.73296	O
U6-1	RNU6-1	chr15:68132276-68132383	chr15	68132276	68132383	III	21	5499	27	8541	35	8689	6.76038	O	7.23236	O	7.06758	O
chr15_6_Pseudo_CTT-	TRK-CTT16-1	chr15:76674765-76674838	chr15	76674765	76674838	II	14	16	28	20	12	30	0.0641303	NO	-0.214125	NO	0.514573	NO
chr15_2_tRNALys_CTT+	TRK-CTT1-2	chr15:79152904-79152976	chr15	79152904	79152976	II	23	6000	16	7852	17	7300	6.83002	O	7.42078	O	7.28501	O
chr15_3_tRNACys_GCA+	TRC-GCA5-1	chr15:80036997-80037069	chr15	80036997	80037069	II	11	762	33	1428	20	1405	4.2718	O	4.5325	O	4.84298	O
chr15_4_tRNAArg_TCG+	TRR-TCG1-1	chr15:89878304-89878376	chr15	89878304	89878376	II	78	7792	81	10352	59	9480	6.17843	O	6.54738	O	6.7395	O
chr15_5_Pseudo_GTA-	TRY-GTA12-1	chr15:92254302-92254374	chr15	92254302	92254374	II	21	36	36	28	33	36	0.371969	NO	-0.186413	NO	0.0671142	NO
chr16_34_tRNAGly_CCC-	TRG-CCC2-2	chr16:686736-686806	chr16	686736	686806	II	104	9980	125	13743	90	11924	6.22307	O	6.47343	O	6.63832	O
chr16_1_tRNAArg_CCG+	TRR-CCG1-3	chr16:3200675-3200747	chr16	3200675	3200747	II	81	11509	73	15872	64	12618	6.69981	O	7.27042	O	7.07203	O
chr16_33_Pseudo_AGG-	TRP-AGG6-1	chr16:3202609-3202680	chr16	3202609	3202680	II	97	4919	92	7431	83	5844	5.28424	O	5.93442	O	5.69995	O
chr16_2_tRNAArg_CCT+	TRR-CCT3-1	chr16:3202901-3202973	chr16	3202901	3202973	II	38	6485	38	9611	52	8459	6.58209	O	7.1475	O	6.69383	O
chr16_32_tRNALys_CTT-	TRK-CTT3-1	chr16:3207406-3207478	chr16	3207406	3207478	II	82	4592	79	7621	91	7218	5.36695	O	6.13325	O	5.9045	O
chr16_3_tRNAPro_TGG+	TRP-TGG3-3	chr16:3208923-3208994	chr16	3208923	3208994	II	55	2181	43	3575	57	3261	4.70109	O	5.62596	O	5.24137	O
chr16_4_tRNAPro_AGG_I+	TRP-AGG3-1	chr16:3210386-3210480	chr16	3210386	3210480	II	79	52	76	75	71	76	-0.410632	NO	-0.0136749	NO	0.069709	NO
chr16_5_tRNALys_CTT+	TRK-CTT8-1	chr16:3214939-3215011	chr16	3214939	3215011	II	74	58	62	79	54	68	-0.241008	NO	0.244622	NO	0.222392	NO
chr16_31_Pseudo_TGG-	TRP-TGG4-1	chr16:3220961-3221031	chr16	3220961	3221031	II	78	46	59	71	53	62	-0.50696	NO	0.182478	NO	0.148523	NO
chr16_6_tRNAPro_CGG+	TRP-CGG1-2	chr16:3222049-3222120	chr16	3222049	3222120	II	101	1112	88	2962	82	2413	3.12392	O	4.66425	O	4.44708	O
chr16_7_tRNALys_CTT+	TRK-CTT2-5	chr16:3225692-3225764	chr16	3225692	3225764	II	94	3200	81	7626	61	6811	4.70312	O	6.10796	O	6.2322	O
chr16_30_tRNALys_CTT-	TRK-CTT5-1	chr16:3230555-3230627	chr16	3230555	3230627	II	64	1582	56	3654	51	3188	4.10005	O	5.42079	O	5.3121	O
chr16_29_tRNAPro_AGG-	TRP-AGG2-7	chr16:3232635-3232706	chr16	3232635	3232706	II	74	6675	82	11438	56	10011	6.01058	O	6.67797	O	6.86735	O
chr16_28_tRNAPro_TGG-	TRP-TGG3-4	chr16:3234133-3234204	chr16	3234133	3234204	II	60	2358	56	5279	69	5053	4.72973	O	5.94796	O	5.68211	O
chr16_8_tRNAPro_TGG+	TRP-TGG3-5	chr16:3238094-3238165	chr16	3238094	3238165	II	53	1262	54	2679	46	2468	3.96035	O	5.01123	O	5.03863	O
chr16_9_tRNAPro_AGG+	TRP-AGG2-8	chr16:3239634-3239705	chr16	3239634	3239705	II	82	6724	81	10894	65	10116	5.91417	O	6.6208	O	6.73877	O
chr16_10_tRNALys_CTT+	TRK-CTT4-1	chr16:3241501-3241573	chr16	3241501	3241573	II	77	2407	99	6283	77	5194	4.50942	O	5.61288	O	5.60947	O
chr16_11_tRNAPro_AGG+	TRP-AGG1-1	chr16:3241989-3242060	chr16	3241989	3242060	II	79	1881	82	3701	44	3533	4.13193	O	5.05799	O	5.58942	O
chr16_12_tRNAArg_CCT+	TRR-CCT5-1	chr16:3243918-3243990	chr16	3243918	3243990	II	62	297	59	721	40	673	1.82958	O	3.07694	O	3.3281	O
chr16_13_Pseudo_CTT+	TRK-CTT14-1	chr16:3246153-3246225	chr16	3246153	3246225	II	63	686	52	1692	67	1518	2.94466	O	4.39232	O	3.99628	O
chr16_14_tRNAGln_TTG+	NMTRQ-TTG5-1	chr16:3419813-3419884	chr16	3419813	3419884	II	15	16	9	21	14	29	0.0317089	NO	0.387023	NO	0.423211	NO
MIRb_SINE_MIR_9136662	N/A	chr16:9136662-9137062	chr16	9136662	9137062	II	107	561	88	1918	92	1244	2.10898	O	4.04513	O	3.38441	O
chr16_15_tRNAThr_CGT+	TRT-CGT2-1	chr16:14379750-14379821	chr16	14379750	14379821	II	91	13213	67	18725	49	15199	6.77408	O	7.59507	O	7.59075	O
chr16_27_tRNALeu_TAG-	TRL-TAG3-1	chr16:22207032-22207113	chr16	22207032	22207113	II	51	11435	46	13779	52	13085	7.1451	O	7.50539	O	7.32138	O
chr16_16_tRNALeu_AAG+	TRL-AAG2-4	chr16:22308461-22308542	chr16	22308461	22308542	II	45	13310	63	18371	62	12090	7.47465	O	7.62834	O	7.04154	O
POLR3E_Intronic_MIR_repeat	N/A	chr16:22309683-22310083	chr16	22309683	22310083	II	55	6512	56	11589	52	10271	6.26613	O	7.07793	O	6.97294	O
RUNDC2C_Intronic_AluSg	N/A	chr16:29351318-29351759	chr16	29351318	29351759	II	67	2175	72	4371	50	3951	4.50665	O	5.43119	O	5.63699	O
chr16_17_tRNALeu_CAG+	TRL-CAG2-1	chr16:57333863-57333945	chr16	57333863	57333945	II	72	11561	78	17757	69	14569	6.82829	O	7.36365	O	7.20423	O
chr16_26_tRNALeu_CAG-	TRL-CAG2-2	chr16:57334392-57334474	chr16	57334392	57334474	II	81	11470	66	15362	55	12290	6.69493	O	7.32493	O	7.17932	O
chr16_25_tRNAGly_GCC-	TRG-GCC3-1	chr16:70812114-70812184	chr16	70812114	70812184	II	46	1401	49	3157	36	2351	4.23488	O	5.3342	O	5.17296	O
chr16_24_tRNAGly_GCC-	TRG-GCC2-4	chr16:70812942-70813012	chr16	70812942	70813012	II	42	7964	67	12508	58	9364	6.79478	O	7.01411	O	6.73809	O
chr16_18_tRNAGly_GCC+	TRG-GCC5-1	chr16:70822597-70822667	chr16	70822597	70822667	II	68	108	71	193	51	143	0.493815	NO	1.14269	NO	1.09478	O
chr16_19_tRNAGly_GCC+	TRG-GCC2-5	chr16:70823410-70823480	chr16	70823410	70823480	II	43	498	38	1080	27	618	2.85457	O	4.02888	O	3.50696	O
chr16_20_tRNAMet_CAT+	TRM-CAT2-1	chr16:71460396-71460468	chr16	71460396	71460468	II	46	580	62	1251	55	1203	3.00474	O	3.79949	O	3.85857	O
chr16_21_tRNAGln_CTG+	TRQ-CTG18-1	chr16:71724890-71724963	chr16	71724890	71724963	II	25	21	23	20	28	25	-0.108934	NO	-0.0840643	NO	-0.0766213	NO
chr16_23_tRNALys_TTT-	TRK-TTT1-1	chr16:73512216-73512288	chr16	73512216	73512288	II	12	410	12	753	24	758	3.38904	O	4.22055	O	3.86716	O
chr16_22_tRNAMet_CAT-	TRM-CAT6-1	chr16:87417628-87417700	chr16	87417628	87417700	II	54	5673	69	10062	49	8682	6.08519	O	6.67157	O	6.78501	O
chr17_1_Pseudo_???+	TRU-NNN6-1	chr17:7524457-7524525	chr17	7524457	7524525	II	38	27	59	30	41	34	-0.254573	NO	-0.568843	NO	-0.149747	NO
chr17_2_tRNALys_TTT+	TRK-TTT3-5	chr17:8022473-8022545	chr17	8022473	8022545	II	39	5958	38	7906	26	8949	6.43933	O	6.86673	O	7.32498	O
chr17_3_tRNAGln_CTG+	TRQ-CTG1-5	chr17:8023070-8023141	chr17	8023070	8023141	II	15	2903	7	4049	12	4084	6.02631	O	6.78455	O	6.61401	O
chr17_42_tRNALeu_TAG-	TRL-TAG1-1	chr17:8023632-8023713	chr17	8023632	8023713	II	34	5472	51	8268	34	7512	6.42574	O	6.6787	O	6.88073	O
chr17_4_tRNAArg_TCT_I+	TRR-TCT2-1	chr17:8024243-8024330	chr17	8024243	8024330	II	57	3294	64	5847	40	5334	5.25576	O	5.96628	O	6.25981	O
chr17_5_tRNAGly_GCC+	TRG-GCC2-6	chr17:8029064-8029134	chr17	8029064	8029134	II	71	7681	51	11248	65	10399	6.25449	O	7.12137	O	6.77846	O
chr17_41_tRNASer_CGA-	TRS-CGA1-1	chr17:8042199-8042280	chr17	8042199	8042280	II	75	8196	67	13290	75	12581	6.29173	O	7.10139	O	6.90815	O
chr17_40_tRNAThr_AGT-	TRT-AGT5-1	chr17:8042770-8042843	chr17	8042770	8042843	II	59	5127	62	10026	46	9424	5.85658	O	6.77221	O	6.95878	O
chr17_6_tRNATrp_CCA+	TRW-CCA3-3	chr17:8089676-8089747	chr17	8089676	8089747	II	78	6917	84	11822	87	9573	6.00729	O	6.69995	O	6.3589	O
chr17_7_tRNASer_GCT+	TRS-GCT4-3	chr17:8090184-8090265	chr17	8090184	8090265	II	101	19600	114	29430	91	18939	7.22735	O	7.67654	O	7.29249	O
chr17_8_tRNAThr_AGT+	TRT-AGT1-1	chr17:8090478-8090551	chr17	8090478	8090551	II	77	13550	84	24279	85	17578	6.98773	O	7.73631	O	7.25845	O
chr17_9_tRNAIle_AAT+	TRI-AAT5-5	chr17:8090911-8090984	chr17	8090911	8090984	II	56	9524	88	13616	70	12632	6.79562	O	6.85355	O	6.98436	O
chr17_39_tRNATrp_CCA-	TRW-CCA1-1	chr17:8124187-8124258	chr17	8124187	8124258	II	69	9246	68	14168	67	12677	6.54993	O	7.17869	O	7.03342	O
chr17_10_tRNAGly_TCC+	TRG-TCC3-1	chr17:8124866-8124937	chr17	8124866	8124937	II	105	9536	79	13018	39	11211	6.14688	O	6.90336	O	7.34796	O
chr17_38_tRNAAsp_GTC-	TRD-GTC2-11	chr17:8125556-8125627	chr17	8125556	8125627	II	62	8449	72	12113	65	11363	6.52612	O	6.89541	O	6.906	O
chr17_37_tRNAPro_CGG-	TRP-CGG1-3	chr17:8126151-8126222	chr17	8126151	8126222	II	99	8339	95	13096	81	10790	6.01961	O	6.71436	O	6.607	O
chr17_36_tRNAThr_AGT-	TRT-AGT1-2	chr17:8129553-8129626	chr17	8129553	8129626	II	57	10881	56	16646	50	15522	6.97055	O	7.59922	O	7.60288	O
chr17_35_tRNASer_AGA-	TRS-AGA2-6	chr17:8129928-8130009	chr17	8129928	8130009	II	64	11102	62	18178	63	16171	6.88784	O	7.62872	O	7.44464	O
chr17_34_tRNAIle_AAT-	TRI-AAT4-1	chr17:8130309-8130382	chr17	8130309	8130382	II	58	7591	73	12225	66	10960	6.43633	O	6.89458	O	6.83894	O
chr17_11_tRNASup_CTA+	TR*-CTA1-1	chr17:15408685-15408758	chr17	15408685	15408758	II	61	44	68	44	59	44	-0.298341	NO	-0.405256	NO	-0.26628	NO
TOM1L2_Intronic	N/A	chr17:17863453-17863740	chr17	17863453	17863740	other	65	999	73	2379	64	1879	3.43717	O	4.54772	O	4.34401	O
AluJb_SINE_Alu_17863453	N/A	chr17:17863509-17863951	chr17	17863509	17863951	II	83	1044	84	2420	84	1907	3.2486	O	4.42568	O	4.08672	O
chr17_12_tRNATrp_CCA+	TRW-CCA2-1	chr17:19411494-19411565	chr17	19411494	19411565	II	75	9758	93	14332	71	10259	6.54255	O	6.86745	O	6.6706	O
chr17_33_Pseudo_TTG-	NMTRQ-TTG12-1	chr17:19506587-19506658	chr17	19506587	19506658	II	12	20	28	26	27	30	0.251539	NO	-0.0506261	NO	0.0740006	NO
chr17_13_tRNAGly_CCC+	TRG-CCC3-1	chr17:19764175-19764245	chr17	19764175	19764245	II	55	159	48	377	49	438	1.15285	O	2.38348	O	2.56658	O
AluY_SINE_Alu_19904648	N/A	chr17:19904648-19904827	chr17	19904648	19904827	II	58	38	68	30	53	30	-0.371969	NO	-0.707819	NO	-0.468149	NO
chr17_32_Pseudo_TGA-	NMTRS-TGA3-1	chr17:22028179-22028247	chr17	22028179	22028247	II	27	23	22	21	23	17	-0.10497	NO	-0.0280144	NO	-0.173332	NO
chr17_14_tRNAThr_CGT+	TRT-CGT4-1	chr17:29877093-29877164	chr17	29877093	29877164	II	49	13768	43	17792	30	11828	7.44839	O	7.93155	O	7.62668	O
chr17_31_tRNAAsn_GTT-	TRN-GTT2-5	chr17:36908034-36908107	chr17	36908034	36908107	II	71	6091	128	8618	60	8051	5.92134	O	5.77437	O	6.48847	O
chr17_30_tRNACys_GCA-	TRC-GCA24-1	chr17:36989975-36990046	chr17	36989975	36990046	II	37	55	62	109	38	110	0.343302	NO	0.595379	NO	1.04182	O
chr17_29_tRNACys_GCA-	TRC-GCA14-1	chr17:37017937-37018008	chr17	37017937	37018008	II	17	396	12	1290	21	913	3.18012	O	4.974	O	4.20869	O
chr17_15_tRNACys_GCA+	TRC-GCA2-2	chr17:37023898-37023969	chr17	37023898	37023969	II	34	5795	58	9206	56	8841	6.50804	O	6.71362	O	6.68862	O
chr17_28_tRNACys_GCA-	TRC-GCA4-1	chr17:37025545-37025616	chr17	37025545	37025616	II	77	5764	61	9216	74	8170	5.75888	O	6.66682	O	6.30097	O
chr17_27_tRNACys_GCA-	TRC-GCA2-3	chr17:37309987-37310058	chr17	37309987	37310058	II	48	7856	46	10386	34	10057	6.65968	O	7.09859	O	7.30021	O
chr17_26_tRNACys_GCA-	TRC-GCA2-4	chr17:37310744-37310815	chr17	37310744	37310815	II	68	10097	82	13124	66	11732	6.69121	O	6.87586	O	6.93688	O
chr17_25_tRNASeC_TCA-	TRZ-TCA3-1	chr17:38273553-38273626	chr17	38273553	38273626	II	58	60	73	34	46	39	0.0324215	NO	-0.686501	NO	-0.139403	NO
chr17_16_tRNAGln_TTG+	TRQ-TTG1-1	chr17:47269890-47269961	chr17	47269890	47269961	II	135	12465	157	17022	92	13293	6.24274	O	6.51076	O	6.77089	O
chr17_17_tRNASup_TTA+	TR*-TTA1-1	chr17:58863593-58863663	chr17	58863593	58863663	II	24	30	27	34	34	30	0.152003	NO	0.16711	NO	-0.0931094	NO
chr17_24_tRNAThr_AGT-	TRT-AGT7-1	chr17:62526918-62526991	chr17	62526918	62526991	II	41	55	47	49	46	35	0.259644	NO	0.0369942	NO	-0.22556	NO
chr17_23_tRNAArg_CCG-	TRR-CCG2-1	chr17:66016013-66016085	chr17	66016013	66016085	II	29	7443	37	10486	23	9874	6.98483	O	7.29421	O	7.54588	O
chr17_22_tRNAUndet_???-	TRU-NNN5-1	chr17:66390957-66391031	chr17	66390957	66391031	II	81	45	64	50	53	35	-0.565597	NO	-0.232661	NO	-0.352672	NO
chr17_18_tRNAArg_CCT+	TRR-CCT1-1	chr17:73030001-73030073	chr17	73030001	73030073	II	116	11356	112	16610	74	12646	6.28515	O	6.87262	O	6.92937	O
chr17_21_tRNAArg_CCT-	TRR-CCT2-1	chr17:73030526-73030598	chr17	73030526	73030598	II	144	11316	104	16363	73	12879	6.02695	O	6.9347	O	6.96959	O
chr17_19_tRNAArg_TCG+	TRR-TCG3-1	chr17:73031208-73031280	chr17	73031208	73031280	II	86	11481	100	15922	81	11788	6.63274	O	6.93908	O	6.73428	O
chr17_20_tRNAMet_CAT-	TRX-CAT1-8	chr17:80452597-80452668	chr17	80452597	80452668	II	86	13998	105	19853	90	12615	6.91804	O	7.20243	O	6.71939	O
PTPRM	N/A	chr18:8026571-8026971	chr18	8026571	8026971	other	22	25	28	33	21	26	0.08092	NO	0.119299	NO	0.13493	NO
AluY_SINE_Alu_37641843	N/A	chr18:37641843-37642141	chr18	37641843	37642141	II	59	31	49	40	46	44	-0.544996	NO	-0.174498	NO	-0.0384741	NO
chr18_1_tRNAGlu_CTC+	TRE-CTC6-1	chr18:43299751-43299822	chr18	43299751	43299822	II	55	44	47	37	37	27	-0.199938	NO	-0.200697	NO	-0.233199	NO
chr18_4_tRNALys_CTT-	TRK-CTT6-1	chr18:43669271-43669343	chr18	43669271	43669343	II	48	32	26	24	36	29	-0.331206	NO	-0.0524674	NO	-0.161751	NO
chr18_2_Pseudo_TCC+	TRG-TCC5-1	chr18:55345854-55345925	chr18	55345854	55345925	II	7	9	11	6	10	12	0.0759489	NO	-0.187627	NO	0.0703893	NO
chr18_3_Pseudo_TCC+	TRG-TCC6-1	chr18:55346177-55346248	chr18	55346177	55346248	II	13	14	13	13	14	9	0.0331669	NO	0	NO	-0.174029	NO
AluSg_SINE_Alu	N/A	chr19:357075-357378	chr19	357075	357378	II	96	72	98	83	106	78	-0.304855	NO	-0.179821	NO	-0.332575	NO
U6-9	RNU6-9	chr19:893483-893590	chr19	893483	893590	III	35	5734	47	8963	46	8805	6.47049	O	6.8678	O	6.86109	O
U6-2	RNU6-2	chr19:1021520-1021627	chr19	1021520	1021627	III	65	8682	54	12913	45	11721	6.51893	O	7.26757	O	7.29168	O
chr19_14_tRNAPhe_GAA-	TRF-GAA1-6	chr19:1383361-1383433	chr19	1383361	1383433	II	116	16314	94	24266	106	16795	6.80665	O	7.61423	O	6.95086	O
chr19_1_tRNAAsn_GTT+	TRN-GTT2-6	chr19:1383562-1383635	chr19	1383562	1383635	II	107	14160	134	19562	88	12599	6.69455	O	6.90043	O	6.74181	O
chr19_2_tRNAGly_TCC+	TRG-TCC1-1	chr19:4724082-4724153	chr19	4724082	4724153	II	49	6723	51	9082	41	9356	6.41753	O	6.8137	O	7.04655	O
chr19_13_tRNAVal_CAC-	TRV-CAC3-1	chr19:4724647-4724719	chr19	4724647	4724719	II	23	6952	33	9706	26	8433	7.0415	O	7.27183	O	7.2396	O
chr19_12_Pseudo_TTG-	TRQ-TTG8-1	chr19:9150356-9150428	chr19	9150356	9150428	II	54	54	58	43	37	33	0	NO	-0.269607	NO	-0.0888093	NO
chr19_3_tRNALys_TTT+	TRK-TTT16-1	chr19:19852207-19852277	chr19	19852207	19852277	II	31	53	36	96	42	84	0.444302	NO	0.932886	NO	0.662965	NO
chr19_4_tRNAThr_AGT+	TRT-AGT1-3	chr19:33667963-33668036	chr19	33667963	33668036	II	72	7987	77	10600	57	9122	6.29642	O	6.63439	O	6.71693	O
chr19_5_tRNALys_CTT+	TRK-CTT10-1	chr19:36066750-36066822	chr19	36066750	36066822	II	45	59	36	61	38	50	0.246915	NO	0.463401	NO	0.234465	NO
chr19_11_Pseudo_???-	TRU-NNN10-1	chr19:36111460-36111530	chr19	36111460	36111530	II	77	51	84	51	54	47	-0.401617	NO	-0.49304	NO	-0.125531	NO
chr19_10_tRNAIle_TAT_I-	TRI-TAT1-1	chr19:39902808-39902900	chr19	39902808	39902900	II	52	4753	58	8787	54	7985	5.86615	O	6.64664	O	6.57617	O
chr19_9_Pseudo_TTT-	TRK-TTT10-1	chr19:41748142-41748214	chr19	41748142	41748214	II	47	31	56	31	52	34	-0.336049	NO	-0.495527	NO	-0.357552	NO
chr19_8_tRNASeC(e)_TCA-	TRZ-TCA1-1	chr19:45981860-45981945	chr19	45981860	45981945	III	45	6460	66	10226	56	10260	6.43518	O	6.73922	O	6.90269	O
SNAR-A12_SNAR-A13_1	SNAR-A12	chr19:48410814-48411214	chr19	48410814	48411214	II	107	287	121	610	94	506	1.21031	O	2.08352	O	2.11189	O
SNAR-A1_SNAR-A2_1	SNAR-A1	chr19:48421560-48421960	chr19	48421560	48421960	II	128	579	139	1377	108	1157	1.94652	O	3.05753	O	3.10458	O
SNAR-A3-A11_SNAR-A14_1	SNAR-A3	chr19:48426872-48427272	chr19	48426872	48427272	II	170	659	192	1592	154	1367	1.7845	O	2.86914	O	2.92455	O
SNAR-A1_SNAR-A2_2	SNAR-A2	chr19:48437317-48437717	chr19	48437317	48437717	II	137	584	150	1383	115	1159	1.87839	O	2.97269	O	3.03562	O
SNAR-A12_SNAR-A13_2	SNAR-A13	chr19:48448058-48448458	chr19	48448058	48448458	II	129	302	145	626	111	520	1.06216	NO	1.90634	O	1.96374	O
chr19_7_tRNALys_TTT-	TRK-TTT12-1	chr19:50037933-50038005	chr19	50037933	50038005	II	51	45	56	54	56	49	-0.111031	NO	-0.0339473	NO	-0.122484	NO
SNAR-A3-A11_SNAR-A14_2	SNAR-A4	chr19:50595614-50596014	chr19	50595614	50596014	II	179	899	184	2248	149	1926	2.15218	O	3.41209	O	3.44987	O
SNAR-A3-A11_SNAR-A14_3	SNAR-A14	chr19:50600952-50601352	chr19	50600952	50601352	II	230	984	245	2396	202	2020	1.96347	O	3.14108	O	3.14343	O
AluSx_SINE_55294966	N/A	chr19:50602858-50603138	chr19	50602858	50603138	II	282	274	277	351	255	305	-0.0374747	NO	0.311552	NO	0.233199	NO
SNAR-A3-A11_SNAR-A14_4	SNAR-A5	chr19:50604016-50604416	chr19	50604016	50604416	II	230	984	245	2396	201	2020	1.96347	O	3.14108	O	3.14966	O
SNAR-A3-A11_SNAR-A14_5	SNAR-A6	chr19:50607112-50607512	chr19	50607112	50607512	II	229	985	240	2387	198	2019	1.97046	O	3.16219	O	3.16781	O
SNAR-A3-A11_SNAR-A14_6	SNAR-A7	chr19:50610172-50610572	chr19	50610172	50610572	II	175	899	181	2243	144	1929	2.18005	O	3.42928	O	3.49296	O
SNAR-A3-A11_SNAR-A14_7	SNAR-A8	chr19:50615532-50615932	chr19	50615532	50615932	II	175	898	181	2243	145	1928	2.1785	O	3.42928	O	3.48395	O
SNAR-A3-A11_SNAR-A14_8	SNAR-A9	chr19:50620873-50621273	chr19	50620873	50621273	II	175	902	183	2249	143	1935	2.18471	O	3.41948	O	3.50569	O
SNAR-A3-A11_SNAR-A14_9	SNAR-A10	chr19:50626232-50626632	chr19	50626232	50626632	II	170	893	180	2231	140	1914	2.20633	O	3.4285	O	3.51542	O
SNAR-A3-A11_SNAR-A14_10	SNAR-A11	chr19:50631552-50631952	chr19	50631552	50631952	II	170	894	181	2231	140	1915	2.20789	O	3.42165	O	3.51616	O
chr19_6_tRNALys_CTT-	TRK-CTT11-1	chr19:52425396-52425468	chr19	52425396	52425468	II	68	48	76	42	42	41	-0.329308	NO	-0.557995	NO	-0.0201779	NO
chr20_7_Pseudo_CTC-	TRE-CTC10-1	chr20:13970470-13970541	chr20	13970470	13970541	II	9	12	4	14	9	13	0.106915	NO	0.371969	NO	0.140863	NO
chr20_1_tRNAGln_CTG+	TRQ-CTG17-1	chr20:17855142-17855219	chr20	17855142	17855219	II	49	477	39	1270	39	863	2.68206	O	4.23577	O	3.69399	O
chr20_2_Pseudo_AGA+	TRS-AGA7-1	chr20:30088703-30088774	chr20	30088703	30088774	II	76	76	67	109	58	118	0	NO	0.519028	NO	0.750022	NO
chr20_3_Pseudo_CAC+	TRV-CAC14-1	chr20:43951001-43951073	chr20	43951001	43951073	II	57	63	76	77	45	55	0.0962153	NO	0.0135465	NO	0.180572	NO
chr20_6_tRNALeu_AAG-	TRL-AAG6-1	chr20:48952342-48952423	chr20	48952342	48952423	II	72	47	71	59	60	45	-0.405639	NO	-0.182478	NO	-0.263034	NO
chr20_5_Pseudo_AAT-	TRI-AAT12-1	chr20:51218338-51218415	chr20	51218338	51218415	II	28	31	36	34	33	30	0.0727563	NO	-0.0443941	NO	-0.0703893	NO
chr20_4_Pseudo_TAA-	NMTRL-TAA5-1	chr20:55933428-55933502	chr20	55933428	55933502	II	23	40	47	42	52	35	0.401363	NO	-0.0968615	NO	-0.335184	NO
chr21_1_tRNASup_TTA+	TR*-TTA2-1	chr21:15926516-15926586	chr21	15926516	15926586	II	18	20	2	15	9	18	0.0588937	NO	0.491853	NO	0.29956	NO
chr21_2_tRNAGly_GCC-	TRG-GCC1-5	chr21:18827107-18827177	chr21	18827107	18827177	II	69	7434	39	12818	45	11260	6.23638	O	7.54073	O	7.23394	O
MER41B-int_LTR_ERV1	N/A	chr22:37585520-37591507	chr22	37585520	37591507	other	293	1324	266	2617	322	2609	2.06762	O	3.16069	O	2.90634	O
AluSg/x_SINE_Alu_42443389	N/A	chr22:42443389-42443595	chr22	42443389	42443595	II	61	28	49	39	36	33	-0.649814	NO	-0.195256	NO	-0.0671142	NO
chr22_1_tRNASeC(e)_TCA+	TRZ-TCA2-1	chr22:44546537-44546622	chr22	44546537	44546622	III	83	47	62	45	47	46	-0.553392	NO	-0.294743	NO	-0.018859	NO
chrX_7_tRNAIle_GAT-	TRI-GAT1-1	chrX:3756418-3756491	chrX	3756418	3756491	II	15	18	18	26	12	20	0.0931094	NO	0.222392	NO	0.251539	NO
chrX_6_tRNAIle_GAT-	TRI-GAT1-2	chrX:3794842-3794915	chrX	3794842	3794915	II	24	31	40	47	22	35	0.17585	NO	0.137504	NO	0.321928	NO
chrX_5_tRNAIle_GAT-	TRI-GAT1-3	chrX:3833271-3833344	chrX	3833271	3833344	II	24	31	40	47	22	35	0.17585	NO	0.137504	NO	0.321928	NO
chrX_4_tRNAVal_TAC-	TRV-TAC1-2	chrX:18693029-18693101	chrX	18693029	18693101	II	35	3806	42	5021	39	5262	5.88302	O	6.13243	O	6.26107	O
chrX_3_Pseudo_CTC-	TRE-CTC18-1	chrX:51306112-51306183	chrX	51306112	51306183	II	44	35	63	37	53	39	-0.187086	NO	-0.47307	NO	-0.266515	NO
chrX_1_Pseudo_TTG+	NMTRQ-TTG1-1	chrX:55206666-55206737	chrX	55206666	55206737	II	9	19	14	11	15	20	0.329308	NO	-0.10188	NO	0.152003	NO
chrX_2_tRNALeu_TAA-	NMTRL-TAA4-1	chrX:55207755-55207829	chrX	55207755	55207829	II	18	28	13	19	36	34	0.273018	NO	0.188445	NO	-0.0443941	NO
AluY_SINE_Alu_118157931	N/A	chrX:118157931-118158236	chrX	118157931	118158236	II	46	21	48	35	46	35	-0.575502	NO	-0.263034	NO	-0.22556	NO
chrY_1_Pseudo_TTG-	NMTRQ-TTG8-1	chrY:8240140-8240214	chrY	8240140	8240214	II	0	0	0	0	0	0	0	NO	0	NO	0	NO

## Sheet: neusRNA-seq
							FBS													SS
Locus annotation	HUGO nomenclature	Locus position with link in GRCh37/hg19	Chromosome	Gene start	Gene end	Promoter Type	FBS NC mean tag count *	FBS NC mean tag count * (scaled to gene length)	FBS EU4 tag count *	FBS EU4 % of unique tags	FBS EU4 normalized score log2 (EU4 tag count-NC mean tag count)	FBS EU5 tag count *	FBS EU5 % of unique tags	FBS EU5 normalized score log2 (EU5 tag count-NC mean tag count)	FBS EU6 tag count *	FBS EU6 % of unique tags	FBS EU6 normalized score log2 (EU6 tag count-NC mean tag count)	FBS neusRNA-seq score (EU mean normalized scores)		SS NC mean tag count *	SS EU1 tag count *	SS EU1 % of unique tags	SS EU1 normalized score log2 (EU1 tag count-NC mean tag count)	SS EU2 tag count *	SS EU2 % of unique tags	SS EU2 normalized score log2 (EU2 tag count-NC mean tag count)	SS EU3 tag count *	SS EU3 % of unique tags	SS EU3 normalized score log2 (EU3 tag count-NC mean tag count)	SS neusRNA-seq score (EU mean normalized scores)		FBS vs SS Fold Change	Fold Change pvalue	Adjusted pvalue
chr1_136_Pseudo_???-	TRU-NNN4-1	chr1:7990339-7990408	chr1	7990339	7990408	II	0.333333	4.83092	5.5	72.72	2.62449	8.75	80	3.23522	7	100	2.9386	2.93277		0	9.04444	88.45	3.32769	8	100	3.16993	6	100	2.80735	3.10166		-0.168887	0.472775	0.511398
chr1_135_tRNAAsn_GTT-	TRN-GTT5-1	chr1:16847080-16847153	chr1	16847080	16847153	II	10.2378	140.244	2320.04	77.49	11.1742	2439.69	78.45	11.247	1983.14	75.18	10.9468	11.1227		10.1846	504.155	77.35	8.9512	628.409	79.56	9.27431	371.432	74.3	8.50084	8.90878		2.21389	0.000195001	0.00101156
chr1_134_tRNAAsn_GTT-	TRN-GTT18-1	chr1:16858893-16858966	chr1	16858893	16858966	II	0.308081	4.22029	43.0114	0	5.44967	53.7059	0	5.76536	32.5495	0	5.05456	5.4232		0	27.7637	0	4.84599	21.2378	0	4.47444	11.1017	0	3.59694	4.30579		1.11741	0.034232	0.0440214
chr1_133_tRNAGlu_TTC-	TRE-TTC4-1	chr1:16861774-16861845	chr1	16861774	16861845	II	30.507	429.676	1128.47	3.36	10.1019	1066.82	3.93	10.0186	1116.16	3.13	10.0857	10.0687		11.2062	652.508	2.45	9.3271	535.589	3.54	9.03722	456.322	4.6	8.80129	9.0552		1.01354	0.00108858	0.00292583
chr1_132_tRNAGly_CCC-	TRG-CCC1-1	chr1:16872434-16872504	chr1	16872434	16872504	II	28.8398	411.997	6208.2	26.46	12.5935	6407.21	23.66	12.6392	4068.87	46.05	11.9805	12.4044		8.71049	1832.07	43.77	10.8332	1822.75	46.85	10.8258	1415.14	47.69	10.4589	10.7059		1.69846	0.000720337	0.00227894
chr1_131_Pseudo_CAC-	TRV-CAC11-1	chr1:16874160-16874232	chr1	16874160	16874232	II	1.16667	16.2037	481.667	6.02	8.91137	382.5	4.96	8.57869	491.667	5.69	8.94103	8.81036		0.833333	181.5	0	7.50515	198.5	0.5	7.63421	174	0	7.44432	7.52789		1.28247	0.000180053	0.000990284
chr1_130_tRNAGly_CCC-	TRG-CCC4-1	chr1:17004766-17004836	chr1	17004766	17004836	II	8.8	125.714	5285.8	99.26	12.3658	5290.76	99.53	12.3671	3099.73	98.68	11.5943	12.1091		2.33333	1238.17	97.64	10.2724	1230.2	98.43	10.2631	964.712	97.95	9.91196	10.1492		1.9599	0.000697132	0.00223153
chr1_129_tRNAVal_CAC-	TRV-CAC10-1	chr1:17006501-17006573	chr1	17006501	17006573	II	0	0	136.333	99.75	7.1015	83	100	6.39232	225.667	99.26	7.82439	7.10607		0	160.5	99.68	7.33539	142.5	99.64	7.16491	102.5	99.51	6.69349	7.06459		0.0414741	0.924107	0.960373
chr1_1_Pseudo_CAC+	TRV-CAC13-1	chr1:17052061-17052133	chr1	17052061	17052133	II	0	0	7	100	3	2	100	1.58496	3	100	2	2.19499		0	1	100	1	3	100	2	3	100	2	1.66667		0.528321	0.326901	0.364072
chr1_2_tRNAGly_CCC+	TRG-CCC5-1	chr1:17053780-17053850	chr1	17053780	17053850	II	19.8333	283.333	1917.3	82.09	10.8906	2069.38	85.91	11.0018	1717.04	82.4	10.7298	10.8741		2.37037	890.01	86.29	9.79546	867.858	86.99	9.75902	700.757	88.19	9.44993	9.66814		1.20593	0.00028904	0.00129114
chr1_128_Pseudo_CTG-	TRQ-CTG14-1	chr1:17180900-17180971	chr1	17180900	17180971	II	0	0	0	NA	0	1	100	1	0.333333	0	0.411426	0.470475		0	0	NA	0	0	NA	0	0	NA	0	0		0.470475	0.138651	0.161459
chr1_3_Pseudo_CAC+	TRV-CAC11-2	chr1:17186693-17186765	chr1	17186693	17186765	II	1.16667	16.2037	475.167	4.62	8.89176	378	3.96	8.56161	480	3.75	8.90639	8.78659		0.166667	190.5	4.72	7.57994	204	3.92	7.67831	192.5	9.87	7.59495	7.61773		1.16885	0.000190063	0.00101156
chr1_4_tRNAGly_CCC+	TRG-CCC1-2	chr1:17188416-17188486	chr1	17188416	17188486	II	21.6176	308.823	5137.85	11.13	12.3211	5515.26	11.16	12.4238	2786.75	20.66	11.4337	12.0595		5.21049	1368.16	24.63	10.4136	1334.85	26.89	10.3779	983.891	24.39	9.93617	10.2425		1.81699	0.00244233	0.00498933
chr1_5_tRNAGlu_TTC+	TRE-TTC3-1	chr1:17199078-17199149	chr1	17199078	17199149	II	28.0085	394.485	1178.88	27.73	10.1698	1171.13	35.6	10.16	1059.57	25.48	10.012	10.1139		7.75219	665.287	46.89	9.36311	588.39	45.37	9.18396	463.359	41.86	8.83479	9.12728		0.986648	0.00154204	0.00348911
chr1_6_tRNAAsn_GTT+	TRN-GTT13-1	chr1:17201958-17202031	chr1	17201958	17202031	II	0.641414	8.7865	47.3364	8.45	5.57561	60.2059	9.96	5.92029	33.5495	2.98	5.08321	5.52637		0.333333	27.7637	0	4.82917	21.2378	0	4.45264	11.1017	0	3.55663	4.27948		1.24689	0.0286066	0.0375297
chr1_7_tRNAAsn_GTT+	TRN-GTT4-1	chr1:17216172-17216245	chr1	17216172	17216245	II	1.10936	15.1968	1527.61	90.14	10.577	1856.14	91.42	10.858	1179.73	90.1	10.2041	10.5464		2.18462	174.588	84.77	7.43793	193.213	84.88	7.58516	170.239	88.11	7.40128	7.47479		3.07157	1.63439e-05	0.000368153
chr1_8_Pseudo_CTT+	TRK-CTT12-1	chr1:39970195-39970267	chr1	39970195	39970267	II	4.00689	55.6513	1124.69	3.73	10.1315	1368.58	6.21	10.4153	669.243	5.22	9.37989	9.97554		2.01704	122.767	7.33	6.92778	129.298	3.86	7.00315	99.5248	17.08	6.6222	6.85104		3.1245	0.000156493	0.000917151
chr1_127_tRNALys_CTT-	TRK-CTT7-1	chr1:55423542-55423614	chr1	55423542	55423614	II	10.2451	142.293	3957.23	5.53	11.9469	3727.36	6.27	11.8604	3373.88	8.5	11.7162	11.8412		5.10538	722.288	5.39	9.4882	869.218	5.4	9.75674	630.967	5.7	9.292	9.51231		2.32885	1.92697e-05	0.000368153
chr1_126_tRNACys_GCA-	TRC-GCA7-1	chr1:93981834-93981906	chr1	93981834	93981906	II	0	0	199.053	81.88	7.64422	183.732	83.27	7.52927	136.567	84.93	7.10392	7.4258		0	34.4873	75.39	5.14893	37.0571	72.86	5.24982	22.7237	79.21	4.56803	4.98893		2.43687	0.000198444	0.00101156
chr1_9_tRNAArg_TCT_I+	TRR-TCT1-1	chr1:94313129-94313213	chr1	94313129	94313213	II	6.06667	72.2222	4435.76	88.32	12.1133	4561.21	89.62	12.1536	3170.28	85.89	11.6281	11.965		2.10833	1710.59	96.92	10.7393	1539.81	96.5	10.5875	1144.87	96.51	10.1596	10.4955		1.46953	0.00130727	0.00330282
chr1_125_Pseudo_???-	TRU-NNN8-1	chr1:108496275-108496345	chr1	108496275	108496345	II	0	0	2	100	1.58496	0	NA	0	0	NA	0	0.528321		0.333333	0	NA	0	0	NA	0	0	NA	0	0		0.528321	0.320555	0.360455
chr1_124_Pseudo_GTT-	TRN-GTT21-1	chr1:143663558-143663631	chr1	143663558	143663631	II	0	0	6.70311	14.91	2.94486	14.6548	40.94	3.96809	8.76905	57.01	3.28688	3.39994		0	4.60519	43.42	2.48543	4.93571	60.78	2.56803	1.98095	50.48	1.57531	2.20959		1.19035	0.0308282	0.0401497
chr1_10_tRNAAsn_GTT+	TRN-GTT16-1	chr1:143690028-143690101	chr1	143690028	143690101	II	0	0	6.2112	0	2.85	6.94932	0	2.98914	7.85217	0	3.14568	2.99494		0	2.45417	0	1.7866	1.05	0	1.03562	1.13194	0	1.09085	1.30436		1.69058	0.00088385	0.0025482
chr1_11_tRNAAsn_GTT+	TRN-GTT11-1	chr1:144301611-144301684	chr1	144301611	144301684	II	0.0790598	1.08301	100.522	0	6.66453	119.012	0	6.90609	77.02	0	6.28435	6.61832		0.0512821	10.6111	0	3.53107	10.6254	0	3.53232	9.49545	0	3.38405	3.48248		3.13585	1.17265e-05	0.00036454
chr1_123_tRNAAsn_GTT-	TRN-GTT16-2	chr1:144308614-144308687	chr1	144308614	144308687	II	0	0	6.2112	0	2.85	6.94932	0	2.98914	7.60217	0	3.10434	2.98116		0	2.45417	0	1.7866	1.05	0	1.03562	1.13194	0	1.09085	1.30436		1.6768	0.000861358	0.00251376
chr1_12_tRNAAsn_GTT+	TRN-GTT14-1	chr1:144481840-144481913	chr1	144481840	144481913	II	0	0	11.0667	27.1	3.59216	11.7333	25.56	3.67016	8.53333	11.71	3.25248	3.50493		0	2.4	41.66	1.76553	0.666667	0	0.731183	0.333333	0	0.411426	0.969381		2.53555	0.00133894	0.00334735
chr1_122_tRNAAsn_GTT-	TRN-GTT16-3	chr1:144488843-144488916	chr1	144488843	144488916	II	0	0	6.2112	0	2.85	6.94932	0	2.98914	7.60217	0	3.10434	2.98116		0	2.45417	0	1.7866	1.05	0	1.03562	1.13194	0	1.09085	1.30436		1.6768	0.000861358	0.00251376
chr1_121_tRNAGln_CTG-	TRQ-CTG8-1	chr1:144839436-144839507	chr1	144839436	144839507	II	0.166667	2.34742	26.1682	0	4.75453	21.0769	0	4.45308	25.7092	0	4.72973	4.64578		0	8.40952	0	3.23266	3.32143	0	2.11103	2.66667	0	1.87184	2.40518		2.2406	0.00236958	0.00485666
chr1_120_tRNAGln_CTG-	TRQ-CTG8-2	chr1:145379320-145379391	chr1	145379320	145379391	II	0.166667	2.34742	26.1682	0	4.75453	22.0769	4.52	4.51749	27.7092	7.21	4.83458	4.7022		0	9.40952	10.62	3.37851	3.32143	0	2.11103	3.66667	27.27	2.22033	2.56996		2.13224	0.00255615	0.00513385
chr1_13_tRNAAsn_GTT+	TRN-GTT20-1	chr1:145385729-145385804	chr1	145385729	145385804	II	0	0	12	100	3.70044	9	100	3.32193	7	100	3	3.34079		0.333333	2	100	1.41504	2	100	1.41504	0	NA	0	0.943358		2.39743	0.0037418	0.00659684
chr1_119_tRNALys_CTT-	TRK-CTT2-1	chr1:145395522-145395594	chr1	145395522	145395594	II	16.3593	227.212	5696.43	7.91	12.4719	5761.97	9.14	12.4885	4806.74	8.75	12.2262	12.3956		8.22805	1674.52	17.07	10.7033	1769.4	17.74	10.7831	1472.3	14.39	10.5168	10.6677		1.72783	2.84261e-05	0.000381062
chr1_118_tRNAHis_GTG-	TRH-GTG1-1	chr1:145396881-145396952	chr1	145396881	145396952	II	8.87182	124.955	12542.5	93.2	13.6136	11140.3	93.36	13.4425	12408.4	95.18	13.5981	13.5514		4.33333	9252.24	96.56	13.1751	11483.1	97.53	13.4868	8446.9	97.36	13.0436	13.2352		0.316237	0.0722245	0.0875263
chr1_117_tRNAGly_TCC-	TRG-TCC2-1	chr1:145397864-145397935	chr1	145397864	145397935	II	9.65688	136.012	1415.6	27.83	10.4584	1336.53	32.02	10.3749	1406.94	23.24	10.4494	10.4276		2.63889	944.139	33.78	9.88034	768.327	43.99	9.58249	677.659	32.9	9.40091	9.62124		0.806326	0.00221478	0.00457679
chr1_116_tRNAGlu_CTC-	TRE-CTC1-1	chr1:145399233-145399304	chr1	145399233	145399304	II	72.8331	1025.82	2493.8	27.38	11.242	1861.17	23.53	10.8052	2899.06	33.14	11.4652	11.1708		29.2398	2271.89	37.94	11.1316	2047.16	46.01	10.9794	1466.23	40.98	10.4898	10.8669		0.303837	0.283028	0.320197
chr1_14_Pseudo_CCT+	TRR-CCT6-1	chr1:145941579-145941649	chr1	145941579	145941649	II	0	0	0	NA	0	0	NA	0	0.5	0	0.584963	0.194988		0	0	NA	0	0	NA	0	0	NA	0	0		0.194988	0.336934	0.371198
chr1_15_tRNAGln_CTG+	TRQ-CTG3-1	chr1:145963304-145963375	chr1	145963304	145963375	II	13.8923	195.666	6966.09	0	12.7635	6976.66	0	12.7657	1685.76	0	10.7081	12.0791		3.45408	641.143	0	9.31898	878.086	0	9.77418	732.254	0	9.51136	9.53484		2.54423	0.0102565	0.0154713
chr1_115_tRNAAsn_GTT-	TRN-GTT9-1	chr1:145979034-145979107	chr1	145979034	145979107	II	0.944444	12.9376	508.169	0	8.9893	490.176	0	8.93731	468.261	0	8.87134	8.93265		1.55556	86.763	0	6.42973	94.1295	0	6.54792	78.3281	0	6.28108	6.41958		2.51307	1.46424e-06	0.000284258
chr1_114_tRNAGln_CTG-	TRQ-CTG10-1	chr1:146476760-146476831	chr1	146476760	146476831	II	0	0	14.4574	55.33	3.94953	8.25	72.72	3.20945	18.2662	60.22	4.26754	3.80884		0	6.80952	58.74	2.96347	7.25	82.75	3.04439	4.66667	85.71	2.5008	2.83622		0.972618	0.0308925	0.0401603
chr1_16_tRNAHis_GTG+	TRH-GTG1-2	chr1:146544773-146544844	chr1	146544773	146544844	II	5.69073	80.1512	1002.72	34.6	9.96293	900.56	36.53	9.80715	681.185	36.11	9.40193	9.724		2.71296	419.972	43.09	8.70826	405.989	47.29	8.65918	300.666	41.57	8.22376	8.5304		1.19361	0.00252399	0.00508791
chr1_17_Pseudo_TTC+	TRE-TTC14-1	chr1:146550178-146550249	chr1	146550178	146550249	II	0	0	4	100	2.32193	1	100	1	6	100	2.80735	2.04309		0	2	100	1.58496	0	NA	0	0	NA	0	0.528321		1.51477	0.0778199	0.0939886
chr1_18_Pseudo_CCT+	TRR-CCT6-2	chr1:147483291-147483361	chr1	147483291	147483361	II	0	0	0	NA	0	0	NA	0	0.5	0	0.584963	0.194988		0	0	NA	0	0	NA	0	0	NA	0	0		0.194988	0.336934	0.371198
chr1_19_tRNAGln_CTG+	TRQ-CTG3-2	chr1:147505038-147505109	chr1	147505038	147505109	II	13.8923	195.666	6966.09	0	12.7635	6976.66	0	12.7657	1685.76	0	10.7081	12.0791		3.45408	641.143	0	9.31898	878.086	0	9.77418	732.254	0	9.51136	9.53484		2.54423	0.0102565	0.0154713
chr1_113_tRNAAsn_GTT-	TRN-GTT9-2	chr1:147520767-147520840	chr1	147520767	147520840	II	0.944444	12.9376	508.169	0	8.9893	490.176	0	8.93731	468.261	0	8.87134	8.93265		1.55556	86.763	0	6.42973	94.1295	0	6.54792	78.3281	0	6.28108	6.41958		2.51307	1.46424e-06	0.000284258
chr1_20_tRNAAsn_ATT+	TRN-ATT1-1	chr1:147719029-147719102	chr1	147719029	147719102	II	0	0	8.07576	49.53	3.1811	9.92045	70.56	3.4489	7.92803	50.45	3.15704	3.26235		0	4.14286	48.27	2.36177	3.95833	25.26	2.30743	4.25	70.58	2.39232	2.35384		0.908511	0.000317911	0.00134179
chr1_112_tRNAGln_CTG-	TRQ-CTG4-1	chr1:147737382-147737453	chr1	147737382	147737453	II	13.956	196.564	6922.25	0.3	12.7543	6916.67	0.21	12.7532	1685.82	2.78	10.7081	12.0719		3.19347	624.639	2.08	9.2818	862.209	1.73	9.74822	717.375	1.81	9.48217	9.50406		2.5678	0.00972746	0.0147667
OTHER5	N/A	chr1:147752681-147752773	chr1	147752681	147752773	other	0.333333	3.62319	121.5	99.58	6.93271	120.5	99.58	6.92085	70	97.14	6.14296	6.6655		0	24.5	97.95	4.67243	19	100	4.32193	22.5	97.77	4.55459	4.51631		2.14919	0.000437203	0.00163665
chr1_21_tRNAHis_GTG+	TRH-GTG1-3	chr1:147753471-147753542	chr1	147753471	147753542	II	4.33028	60.9899	997.027	0	9.95666	902.917	0	9.81311	671.036	0	9.38306	9.71761		1.71296	377.597	0	8.55796	333.998	0	8.38059	268.004	0	8.06226	8.3336		1.38401	0.00125995	0.00320592
chr1_111_tRNAHis_GTG-	TRH-GTG1-4	chr1:147774845-147774916	chr1	147774845	147774916	II	4.33028	60.9899	992.527	0	9.95011	902.917	0.22	9.81311	668.536	0	9.37765	9.71362		1.71296	377.597	0.26	8.55796	332.998	0	8.37626	264.504	0	8.04325	8.32582		1.3878	0.00133785	0.00334735
OTHER2_RP3TR2	N/A	chr1:147775601-147775693	chr1	147775601	147775693	other	0.666667	7.24638	306.1	98.33	8.25943	221.6	98.37	7.79398	270.9	98.92	8.08339	8.0456		1.33333	153.6	99.6	7.2599	160.25	99.84	7.32118	92.9	99.03	6.53242	7.03783		1.00777	0.0127407	0.0188215
chr1_110_Pseudo_TTC-	TRE-TTC6-1	chr1:147781030-147781101	chr1	147781030	147781101	II	0.666667	9.38967	150.439	91.06	7.23614	232.991	90.99	7.86619	111.348	93.4	6.80314	7.30182		0.037037	43.0403	95.25	5.45954	44.5205	96.58	5.50727	31.1429	99.54	5.00465	5.32382		1.978	0.00163553	0.00365438
chr1_22_tRNAGln_CTG+	TRQ-CTG7-1	chr1:147800937-147801008	chr1	147800937	147801008	II	2.36667	33.3333	281.527	69.62	8.13007	541.309	91.99	9.07664	175.377	65.57	7.44297	8.21656		0.0238095	71.9156	84.82	6.18758	88.1727	83.92	6.47811	70.6087	76.47	6.16142	6.2757		1.94086	0.00711876	0.0112609
chr1_23_Pseudo_CTG+	TRQ-CTG9-1	chr1:147825689-147825760	chr1	147825689	147825760	II	1.33333	18.7793	2031.77	99.76	10.9883	3146.42	99.85	11.6193	1210.42	99.96	10.2409	10.9495		0	324.091	99.97	8.3447	337.273	99.91	8.40203	270.25	99.9	8.08348	8.27674		2.67276	0.00087154	0.00253313
chr1_109_Pseudo_GTT-	TRN-GTT23-1	chr1:147851060-147851133	chr1	147851060	147851133	II	0	0	0	NA	0	0	NA	0	0	NA	0	0		0	0	NA	0	0	NA	0	0	NA	0	0		0	1	1
chr1_24_tRNAAsn_GTT+	TRN-GTT16-4	chr1:147877537-147877610	chr1	147877537	147877610	II	0	0	6.2112	0	2.85	6.94932	0	2.98914	7.85217	0	3.14568	2.99494		0	2.45417	0	1.7866	1.05	0	1.03562	1.13194	0	1.09085	1.30436		1.69058	0.00088385	0.0025482
chr1_25_tRNAAsn_GTT+	TRN-GTT7-1	chr1:148000805-148000878	chr1	148000805	148000878	II	6.1927	84.8315	1048.53	91.46	10.027	1189.96	92.52	10.2104	923.688	91.91	9.84312	10.0268		2.71795	470.369	92.48	8.87235	452.588	95.23	8.81655	270.067	93.68	8.06794	8.58561		1.44123	0.00263377	0.00524554
chr1_26_tRNAAsn_GTT+	TRN-GTT2-1	chr1:148248115-148248188	chr1	148248115	148248188	II	6.3923	87.5657	2477.1	19.37	11.2713	2742.96	17.64	11.4187	1928.16	20.74	10.909	11.1996		6.56835	562.286	54.24	9.1208	565.43	54.11	9.12891	391.766	58.45	8.59319	8.94764		2.25201	0.000152717	0.000902419
chr1_108_tRNAAsn_GTT-	TRN-GTT3-1	chr1:148598314-148598387	chr1	148598314	148598387	II	4.05446	55.5405	2069.34	0.04	11.0128	2291.01	0.43	11.1598	1774.4	0	10.7906	10.9878		5.57906	264.66	0	8.02283	280.79	0	8.10959	200.539	0.99	7.61437	7.91559		3.07217	1.26825e-05	0.000368153
chr1_107_tRNAAsn_GTT-	TRN-GTT3-2	chr1:148760356-148760429	chr1	148760356	148760429	II	4.05446	55.5405	2067.44	0	11.0115	2286.88	0.3	11.1572	1774.2	0	10.7905	10.9864		5.57906	264.16	0	8.02005	280.69	0	8.10906	198.539	0	7.59957	7.90956		3.07684	1.359e-05	0.000368153
chr1_27_Pseudo_CTG+	TRQ-CTG11-1	chr1:149079364-149079435	chr1	149079364	149079435	II	0	0	19.7669	96.12	4.37573	18.9056	95.21	4.3147	14.7543	88.1	3.97728	4.22257		0	4.47619	67.02	2.45154	4.25	94.11	2.39232	1	100	1	1.94795		2.27462	0.00385869	0.00676217
chr1_106_tRNAHis_GTG-	TRH-GTG2-1	chr1:149155828-149155899	chr1	149155828	149155899	II	10.8655	153.035	949.529	61.92	9.876	1087.71	73.64	10.0739	582.981	60.55	9.16269	9.70421		3.06923	345.818	66.5	8.42519	329.394	66.48	8.35457	243.838	65.2	7.91745	8.2324		1.47181	0.00412051	0.00708213
chr1_105_Pseudo_TTC-	TRE-TTC7-1	chr1:149161628-149161699	chr1	149161628	149161699	II	1	14.0845	31.7077	91.46	4.98641	32.7769	97.62	5.0343	11.2077	89.22	3.48543	4.50205		0	11.2504	71.1	3.61471	11.7532	85.08	3.67243	8.51422	70.47	3.24945	3.51219		0.989854	0.0928875	0.110323
chr1_28_tRNAGln_CTG+	TRQ-CTG4-2	chr1:149186125-149186196	chr1	149186125	149186196	II	14.3	201.408	7013.82	0.91	12.7732	6977.71	0.5	12.7658	1739.45	4.77	10.7533	12.0975		3.25408	649.757	4.3	9.33874	895.744	4.57	9.80331	753.282	5.17	9.55273	9.56493		2.53253	0.00971753	0.0147667
chr1_104_Pseudo_GTT-	TRN-GTT22-1	chr1:149211948-149212021	chr1	149211948	149212021	II	0	0	1	100	1	1	100	1	1	100	1	1		0	0	NA	0	0	NA	0	0	NA	0	0		1	8.68506e-06	0.000337325
chr1_103_tRNAAsn_GTT-	TRN-GTT6-1	chr1:149230570-149230643	chr1	149230570	149230643	II	5.14669	70.5026	2435.55	17.4	11.2476	2993.41	33.67	11.5456	1997.57	14.96	10.961	11.2514		7.21667	367.364	49.26	8.49644	384.578	48.1	8.5636	224.545	48.09	7.77034	8.2768		2.97459	0.000137263	0.000872015
chr1_102_Pseudo_TTC-	TRE-TTC10-1	chr1:149278785-149278857	chr1	149278785	149278857	II	5.7	79.1667	251.363	15.11	7.94638	298.999	11.37	8.20109	236.125	15.24	7.85437	8.00061		0.503704	133.461	12.73	7.06562	126.822	18.13	6.99228	95.569	12.55	6.58581	6.88124		1.11938	0.00134458	0.00334975
chr1_101_tRNAAsn_GTT-	TRN-GTT15-1	chr1:149284503-149284576	chr1	149284503	149284576	II	0	0	24.1875	78.55	4.65421	18.9286	52.83	4.31615	16.8564	71.18	4.15785	4.37607		0	9.13115	54.75	3.34056	6.679	74.86	2.93923	4.54444	66.01	2.46989	2.91656		1.45951	0.00292366	0.00555962
chr1_100_Pseudo_GAA-	TRF-GAA9-1	chr1:149287359-149287430	chr1	149287359	149287430	II	5.93041	83.5269	177.924	5.62	7.4346	188.259	6.9	7.51827	183.438	6.54	7.47983	7.47757		2.92288	169.325	4.13	7.38718	106.381	5.64	6.70685	97.7434	9.2	6.58231	6.89211		0.585455	0.05386	0.0665111
chr1_99_tRNAVal_CAC-	TRV-CAC8-1	chr1:149294666-149294736	chr1	149294666	149294736	II	21.2565	303.664	2786.76	95.23	11.4339	2675.97	94.5	11.3749	2424.23	93.22	11.2312	11.3466		4.17901	2053.25	96.48	11.0015	1987.75	96.49	10.9546	1511.69	95.78	10.5589	10.8383		0.508322	0.0186453	0.0262428
chr1_98_tRNAVal_CAC-	TRV-CAC4-1	chr1:149298555-149298627	chr1	149298555	149298627	II	5.54503	77.0143	5671.3	74.92	12.4683	7194.29	85.47	12.8117	4632.97	76.17	12.1763	12.4854		2.84895	2944.75	84.86	11.523	2870.37	84.86	11.4861	2408.7	85.6	11.2329	11.414		1.07143	0.00265951	0.00528209
chr1_97_tRNAAsn_GTT-	TRN-GTT12-1	chr1:149326272-149326345	chr1	149326272	149326345	II	2.22222	30.4414	497.477	26.73	8.95492	408.988	32.03	8.67158	494.379	26.49	8.94588	8.85746		0	165.426	23.57	7.37869	173.439	21.9	7.4465	133.667	23.94	7.07318	7.29946		1.55801	0.0001234	0.00083237
chr1_29_tRNAGlu_CTC+	TRE-CTC17-1	chr1:149334272-149334340	chr1	149334272	149334340	II	0	0	4	100	2.32193	1.5	66.66	1.32193	1	100	1	1.54795		0	2	100	1.58496	0	NA	0	0	NA	0	0.528321		1.01963	0.149615	0.173379
chr1_96_Pseudo_CCT-	TRR-CCT7-1	chr1:149343081-149343151	chr1	149343081	149343151	II	0	0	4.5	66.66	2.45943	4.55	65.93	2.47249	4.6	65.21	2.48543	2.47245		0	3.5	28.57	2.16993	1	100	1	2	50	1.58496	1.58496		0.887486	0.0353452	0.0453713
chr1_30_tRNAAsn_GTT+	TRN-GTT16-5	chr1:149608609-149608682	chr1	149608609	149608682	II	0	0	6.2112	0	2.85	6.94932	0	2.98914	7.60217	0	3.10434	2.98116		0	2.45417	0	1.7866	1.05	0	1.03562	1.13194	0	1.09085	1.30436		1.6768	0.000861358	0.00251376
chr1_95_tRNAAsn_GTT-	TRN-GTT11-2	chr1:149615617-149615690	chr1	149615617	149615690	II	0.0790598	1.08301	100.522	0	6.66453	119.012	0	6.90609	77.02	0	6.28435	6.61832		0.0512821	10.6111	0	3.53107	10.6254	0	3.53232	9.49545	0	3.38405	3.48248		3.13585	1.17265e-05	0.00036454
chr1_94_tRNAGlu_TTC-	TRE-TTC8-1	chr1:149664355-149664427	chr1	149664355	149664427	II	5.45	75.6944	348.675	16.06	8.42719	430.015	13.72	8.73322	275.484	13.43	8.08231	8.41424		0.653704	158.174	14.54	7.30849	141.893	17.61	7.15215	118.189	20.3	6.88907	7.11657		1.29767	0.00165362	0.00367187
chr1_93_tRNAAsn_GTT-	TRN-GTT19-1	chr1:149670057-149670130	chr1	149670057	149670130	II	0	0	1.5	0	1.32193	4.5	44.44	2.45943	2	50	1.58496	1.78877		0	2	100	1.58496	1	100	1	0	NA	0	0.861654		0.92712	0.136496	0.159208
chr1_92_Pseudo_GAA-	TRF-GAA10-1	chr1:149672905-149672976	chr1	149672905	149672976	II	6.26374	88.2217	172.247	2.32	7.38356	179.027	1.11	7.44098	175.286	1.71	7.40959	7.41138		2.95319	164.741	0.6	7.3469	101.929	0.98	6.64347	91.3835	2.18	6.48274	6.82437		0.587006	0.0627387	0.0765498
chr1_91_Pseudo_CCC-	TRG-CCC6-1	chr1:149680210-149680280	chr1	149680210	149680280	II	16.855	240.786	5172.96	25.43	12.3323	5552.99	24.61	12.4349	2857.76	43.07	11.4726	12.08		4.36481	1548.52	65.15	10.5935	1461.79	62.11	10.5102	1200.42	66.47	10.2253	10.443		1.63697	0.00281255	0.00550835
chr1_90_tRNAVal_CAC-	TRV-CAC5-1	chr1:149684088-149684161	chr1	149684088	149684161	II	0.967941	13.2595	1151.04	74.45	10.1688	1038.94	84.22	10.0209	1065.23	73.13	10.057	10.0822		0.208333	882.226	81.27	9.78629	942.062	81.41	9.88089	679.312	80.81	9.40961	9.69226		0.389966	0.0445547	0.0557909
chr1_89_tRNAAsn_GTT-	TRN-GTT8-1	chr1:149711798-149711871	chr1	149711798	149711871	II	1.55556	21.309	639.174	14.08	9.31881	556.155	16.9	9.11789	556.136	14.56	9.11784	9.18485		0	184.426	13.55	7.53465	203.439	17.2	7.67546	148.167	14.84	7.22072	7.47694		1.7079	8.51032e-05	0.000676097
chr1_31_tRNAGlu_TTC+	TRE-TTC16-1	chr1:149719802-149719870	chr1	149719802	149719870	II	0	0	2	100	1.58496	0.5	0	0.584963	1	100	1	1.05664		0	0	NA	0	0	NA	0	0	NA	0	0		1.05664	0.0109736	0.0164489
chr1_88_Pseudo_CCT-	TRR-CCT8-1	chr1:149728271-149728341	chr1	149728271	149728341	II	0	0	1.5	0	1.32193	1.55	0	1.3505	1.6	0	1.37851	1.35031		0	2.5	0	1.80735	0	NA	0	1	0	1	0.935785		0.414527	0.422196	0.459681
chr1_87_tRNAAla_AGC-	TRA-AGC20-1	chr1:150017382-150017452	chr1	150017382	150017452	II	0	0	13	76.92	3.80735	11	81.81	3.58496	14	78.57	3.90689	3.7664		0	3	100	2	2	100	1.58496	1.5	66.66	1.32193	1.63563		2.13077	0.000150788	0.000902419
AluSq_SINE_Alu_150849456	N/A	chr1:150849456-150849752	chr1	150849456	150849752	II	0	0	53.8879	87.21	5.77821	82.97	84.36	6.3918	31.8621	87.87	5.03826	5.73609		0	8.85946	56.43	3.30012	8.65476	80.88	3.27053	8.60278	58.12	3.26303	3.2779		2.45819	0.00103476	0.00283919
chr1_32_tRNAMet_CAT+	TRX-CAT1-1	chr1:153643726-153643797	chr1	153643726	153643797	II	7.28862	102.657	2191.1	9.72	11.0933	1616.25	9.59	10.6528	1904.57	12.23	10.8905	10.8789		2.89537	908.723	26.85	9.82469	849.019	20.96	9.72642	728.059	23.48	9.50414	9.68508		1.19377	0.000578294	0.00198789
chr1_86_tRNAArg_TCT-	TRR-TCT4-1	chr1:159111401-159111474	chr1	159111401	159111474	II	8.66667	118.721	1679.5	99.79	10.7072	1446.5	99.96	10.4907	2186	99.86	11.089	10.7623		1.33333	722.5	99.93	9.49619	838	99.88	9.71023	636	100	9.31213	9.50618		1.25612	0.00143427	0.0034599
MER50_LTR_ERV1	N/A	chr1:160895487-160895761	chr1	160895487	160895761	other	0	0	20	100	4.39232	15	100	4	11	100	3.58496	3.99243		0.166667	0	NA	0	0	NA	0	0	NA	0	0		3.99243	9.64419e-06	0.00034478
chr1_85_tRNAVal_CAC-	TRV-CAC1-1	chr1:161369490-161369562	chr1	161369490	161369562	II	4.14027	57.5038	2428.1	46.33	11.2437	2084.41	45.38	11.0232	1821.55	45.83	10.8285	11.0318		1.21205	1088.95	59.04	10.0884	1092.37	60.78	10.093	923.236	61.84	9.85022	10.0105		1.02128	0.000809846	0.00245356
chr1_33_Pseudo_???+	TRU-NNN3-1	chr1:161390661-161390733	chr1	161390661	161390733	II	0.416667	5.78704	72.091	65.19	6.18335	106.684	79.67	6.74501	39.0102	64.08	5.30719	6.07852		0	18.2767	82.07	4.26828	14.8513	80.8	3.98641	13.9666	85.91	3.90304	4.05258		2.02594	0.0037459	0.00659684
chr1_84_tRNAGlu_TTC-	TRE-TTC4-2	chr1:161391883-161391954	chr1	161391883	161391954	II	32.8152	462.186	1724.26	35.31	10.7249	1656.64	36.64	10.6661	1528.27	27.8	10.5473	10.6461		9.97911	878.648	26.17	9.76432	794.7	35.1	9.61787	623.226	29.2	9.26267	9.54829		1.09781	0.000830675	0.00247472
chr1_83_tRNAAsn_GTT-	TRN-GTT2-2	chr1:161397867-161397940	chr1	161397867	161397940	II	4.40288	60.3134	2469.62	17.89	11.2681	2851.97	18.86	11.476	1712.7	11.85	10.7392	11.1611		5.2989	383.928	33.6	8.56844	397.851	36.44	8.62043	245.734	34.18	7.9155	8.36812		2.79297	0.000216323	0.00105939
chr1_82_tRNAGly_TCC-	TRG-TCC4-1	chr1:161409961-161410032	chr1	161409961	161410032	II	14.0509	197.9	549.545	73.87	9.06742	448.957	72.16	8.76786	577.493	88.48	9.14068	8.99199		1.7037	426.236	89.38	8.73312	310.029	86.76	8.27296	275.996	89.49	8.10481	8.37029		0.621695	0.0293899	0.0383464
chr1_81_tRNAAsp_GTC-	TRD-GTC2-1	chr1:161410615-161410686	chr1	161410615	161410686	II	119.817	1687.56	5316.07	0.03	12.3435	5852.4	0.06	12.4852	3191.72	0.06	11.5854	12.138		57.8606	2412.56	0.04	11.2019	1729.93	0.05	10.7083	1075.03	0.27	9.99177	10.634		1.50405	0.014478	0.0210247
chr1_34_tRNALeu_CAG+	TRL-CAG1-1	chr1:161411323-161411405	chr1	161411323	161411405	II	2.08491	25.4257	605.333	0.16	9.239	602.725	0.49	9.23276	474.373	0.63	8.88658	9.11945		0.71455	329.291	0	8.36447	288.045	0	8.17156	205.896	0	7.68774	8.07459		1.04486	0.00489233	0.00804141
chr1_35_tRNAGly_GCC+	TRG-GCC1-1	chr1:161413094-161413164	chr1	161413094	161413164	II	36.1953	517.076	2550.41	0	11.2965	2280.94	0	11.133	1966.68	0	10.9155	11.115		10.0463	1352.89	0	10.3921	1137.57	0	10.1402	934.809	0	9.85449	10.129		0.986022	0.00284761	0.00550835
chr1_80_tRNAGlu_CTC-	TRE-CTC1-2	chr1:161417018-161417089	chr1	161417018	161417089	II	53.7394	756.893	1822.62	0	10.7894	1428.24	0	10.4257	1953.35	0	10.8923	10.7025		23.0656	1435.8	0	10.4653	1119.62	0	10.1001	888.496	0	9.75893	10.1081		0.594374	0.0496021	0.0617866
chr1_79_tRNAGly_TCC-	TRG-TCC2-2	chr1:161417375-161417446	chr1	161417375	161417446	II	9.52077	134.095	1197.62	0	10.2157	1095	0	10.0854	1185.99	0	10.2015	10.1675		2.91389	680.3	0	9.40597	478.307	0	8.896	495.029	0	8.94577	9.08258		1.08495	0.00111304	0.00292583
chr1_78_tRNAAsp_GTC-	TRD-GTC2-2	chr1:161418033-161418104	chr1	161418033	161418104	II	118.203	1664.83	5309.55	0	12.3422	5847.58	0	12.4844	3189.97	0	11.5853	12.1373		57.8884	2411.5	0	11.2013	1727.99	0	10.7066	1070.96	0	9.98595	10.6313		1.50604	0.0145267	0.0210247
chr1_36_tRNALeu_CAG+	TRL-CAG1-2	chr1:161418741-161418823	chr1	161418741	161418823	II	1.91824	23.3932	641.728	0	9.32375	635.775	0	9.31029	488.573	0	8.92972	9.18792		0.71455	334.991	0	8.38921	292.745	0	8.19489	207.696	0	7.70028	8.09479		1.09313	0.0047666	0.00790747
chr1_37_tRNAGly_GCC+	TRG-GCC1-2	chr1:161420467-161420537	chr1	161420467	161420537	II	36.1953	517.076	2550.41	0	11.2965	2280.94	0	11.133	1966.68	0	10.9155	11.115		10.0463	1352.89	0	10.3921	1137.57	0	10.1402	934.809	0	9.85449	10.129		0.986022	0.00284761	0.00550835
chr1_77_tRNAGlu_CTC-	TRE-CTC1-3	chr1:161424398-161424469	chr1	161424398	161424469	II	53.8622	758.622	1818.63	0	10.7861	1424.43	0	10.4216	1949.09	0	10.8889	10.6989		23.0716	1435.47	0	10.4649	1118.05	0	10.098	887.711	0	9.75763	10.1069		0.592006	0.0504479	0.062622
chr1_76_tRNAGly_TCC-	TRG-TCC2-3	chr1:161424756-161424827	chr1	161424756	161424827	II	9.52077	134.095	1197.62	0	10.2157	1095	0	10.0854	1185.99	0	10.2015	10.1675		2.91389	680.3	0	9.40597	478.307	0	8.896	495.029	0	8.94577	9.08258		1.08495	0.00111304	0.00292583
chr1_75_tRNAAsp_GTC-	TRD-GTC2-3	chr1:161425414-161425485	chr1	161425414	161425485	II	118.203	1664.83	5309.55	0	12.3422	5847.58	0	12.4844	3189.97	0	11.5853	12.1373		57.8884	2411.5	0	11.2013	1727.99	0	10.7066	1070.96	0	9.98595	10.6313		1.50604	0.0145267	0.0210247
chr1_38_tRNALeu_CAG+	TRL-CAG1-3	chr1:161426122-161426204	chr1	161426122	161426204	II	1.91824	23.3932	641.259	0	9.32269	635.936	0	9.31065	488.684	0	8.93005	9.18779		0.71455	334.866	0	8.38865	292.633	0	8.19435	208.196	0	7.70374	8.09558		1.09222	0.00468885	0.00785135
chr1_39_tRNAGly_GCC+	TRG-GCC1-3	chr1:161427898-161427968	chr1	161427898	161427968	II	36.1953	517.076	2550.41	0	11.2965	2280.94	0	11.133	1966.68	0	10.9155	11.115		10.0463	1352.89	0	10.3921	1137.57	0	10.1402	934.809	0	9.85449	10.129		0.986022	0.00284761	0.00550835
chr1_74_tRNAGlu_CTC-	TRE-CTC1-4	chr1:161431809-161431880	chr1	161431809	161431880	II	53.7394	756.893	1822.62	0	10.7894	1428.24	0	10.4257	1953.35	0	10.8923	10.7025		23.0656	1435.8	0	10.4653	1119.62	0	10.1001	888.496	0	9.75893	10.1081		0.594374	0.0496021	0.0617866
chr1_73_tRNAGly_TCC-	TRG-TCC2-4	chr1:161432166-161432237	chr1	161432166	161432237	II	9.52077	134.095	1197.62	0	10.2157	1095	0	10.0854	1185.99	0	10.2015	10.1675		2.91389	680.3	0	9.40597	478.307	0	8.896	495.029	0	8.94577	9.08258		1.08495	0.00111304	0.00292583
chr1_72_tRNAAsp_GTC-	TRD-GTC2-4	chr1:161432824-161432895	chr1	161432824	161432895	II	118.203	1664.83	5309.55	0	12.3422	5847.58	0	12.4844	3189.97	0	11.5853	12.1373		57.8884	2411.5	0	11.2013	1727.99	0	10.7066	1070.96	0	9.98595	10.6313		1.50604	0.0145267	0.0210247
chr1_40_tRNALeu_CAG+	TRL-CAG1-4	chr1:161433532-161433614	chr1	161433532	161433614	II	1.91824	23.3932	641.728	0	9.32375	635.775	0	9.31029	488.573	0	8.92972	9.18792		0.71455	334.991	0	8.38921	292.745	0	8.19489	207.696	0	7.70028	8.09479		1.09313	0.0047666	0.00790747
chr1_41_tRNAGly_GCC+	TRG-GCC1-4	chr1:161435258-161435328	chr1	161435258	161435328	II	36.1953	517.076	2550.41	0	11.2965	2280.94	0	11.133	1966.68	0	10.9155	11.115		10.0463	1352.89	0	10.3921	1137.57	0	10.1402	934.809	0	9.85449	10.129		0.986022	0.00284761	0.00550835
chr1_71_tRNAGlu_CTC-	TRE-CTC1-5	chr1:161439189-161439260	chr1	161439189	161439260	II	53.8622	758.622	1818.63	0	10.7861	1424.43	0	10.4216	1949.09	0	10.8889	10.6989		23.0716	1435.47	0	10.4649	1118.05	0	10.098	887.711	0	9.75763	10.1069		0.592006	0.0504479	0.062622
chr1_70_tRNAGly_TCC-	TRG-TCC2-5	chr1:161439547-161439618	chr1	161439547	161439618	II	9.52077	134.095	1197.62	0	10.2157	1095	0	10.0854	1185.99	0	10.2015	10.1675		2.91389	680.3	0	9.40597	478.307	0	8.896	495.029	0	8.94577	9.08258		1.08495	0.00111304	0.00292583
chr1_69_tRNAAsp_GTC-	TRD-GTC2-5	chr1:161440205-161440276	chr1	161440205	161440276	II	118.203	1664.83	5310.01	0	12.3423	5848.74	0.01	12.4847	3190.13	0	11.5854	12.1375		57.8884	2412.81	0.04	11.2021	1728.32	0	10.7069	1071.12	0	9.98616	10.6317		1.50577	0.0145556	0.0210247
chr1_42_tRNALeu_CAG+	TRL-CAG1-5	chr1:161440913-161440995	chr1	161440913	161440995	II	1.91824	23.3932	641.728	0	9.32375	635.775	0	9.31029	488.573	0	8.92972	9.18792		0.71455	334.991	0	8.38921	292.745	0	8.19489	207.696	0	7.70028	8.09479		1.09313	0.0047666	0.00790747
chr1_43_tRNAGly_GCC+	TRG-GCC4-1	chr1:161450356-161450426	chr1	161450356	161450426	II	2.66667	38.0952	156.567	98.99	7.27513	125.833	99.33	6.9561	158.4	99.74	7.29217	7.17446		0.333333	69.1111	99.83	6.12467	64	100	6.01495	72	100	6.18322	6.10761		1.06685	0.000324161	0.00134179
chr1_44_Pseudo_GTC+	TRD-GTC10-1	chr1:161492935-161493006	chr1	161492935	161493006	II	2.66667	37.5587	183.3	99.29	7.50489	198.6	99.69	7.62156	86.9667	98.88	6.41436	7.18027		0.333333	100.425	99.57	6.65945	98.2769	99.71	6.62843	59.1	99.83	5.90127	6.39638		0.783886	0.118405	0.138787
chr1_68_tRNAGly_GCC-	TRG-GCC2-1	chr1:161493637-161493707	chr1	161493637	161493707	II	47.3143	675.918	3862.97	9.73	11.8981	3314.78	8.65	11.6744	2593.48	8.25	11.3147	11.6291		17.047	1804.75	8.86	10.8047	1653.33	11.61	10.6771	1292.73	9.43	10.3182	10.6		1.02907	0.00448512	0.00754556
chr1_67_tRNALeu_CAG-	TRL-CAG1-6	chr1:161500132-161500214	chr1	161500132	161500214	II	5.01824	61.198	806.168	29.39	9.64772	752.525	24.71	9.54787	741.263	39.39	9.526	9.57387		0.933598	542.169	41.13	9.08276	588.317	52.01	9.2006	407.033	50.61	8.66924	8.9842		0.589664	0.0139033	0.0203289
chr1_45_tRNAGly_TCC+	TRG-TCC2-6	chr1:161500903-161500974	chr1	161500903	161500974	II	12.9565	182.486	3105.23	64.72	11.5949	2567.13	61.23	11.3192	3637.36	69.08	11.8239	11.5793		3.83056	2763.88	76.19	11.431	2895.3	84.1	11.4981	2162.86	77.53	11.0768	11.3353		0.244043	0.243162	0.276849
chr1_46_tRNAAsp_GTC+	TRD-GTC7-1	chr1:161501915-161501986	chr1	161501915	161501986	II	0.333333	4.69484	61	88.52	5.94642	58	89.65	5.87447	38.5	88.31	5.29155	5.70415		0.333333	4	100	2.22239	5.5	90.9	2.62449	6	83.33	2.73697	2.52795		3.1762	4.79026e-05	0.000496382
chr1_47_tRNAAsn_GTT+	TRN-GTT1-1	chr1:161510031-161510104	chr1	161510031	161510104	II	6.67435	91.4295	3067.1	38.83	11.58	3342.28	43.56	11.7042	2110.79	26.62	11.0397	11.4413		7.89762	512.596	57.55	8.98213	551.166	59.14	9.08817	385.037	65.44	8.56276	8.87769		2.56359	0.000133509	0.000872015
chr1_48_tRNAAsp_GTC+	TRD-GTC9-1	chr1:161574588-161574659	chr1	161574588	161574659	II	0	0	2	100	1.58496	0	NA	0	0	NA	0	0.528321		0.333333	0	NA	0	1	100	0.736966	0	NA	0	0.245655		0.282666	0.615153	0.655491
chr1_66_tRNALeu_CAA-	TRL-CAA6-1	chr1:161581736-161581819	chr1	161581736	161581819	II	0	0	32.1925	83.87	5.05268	42.4756	89.46	5.44195	20.5361	82.78	4.42828	4.9743		0	8.5625	81.75	3.25701	14.5801	96.02	3.96162	10.3125	96.96	3.49953	3.57272		1.40158	0.00822916	0.0128328
chr1_49_tRNAGlu_TTC+	TRE-TTC5-1	chr1:161582508-161582579	chr1	161582508	161582579	II	0	0	2	100	1.58496	3	100	2	2	100	1.58496	1.72331		0	0	NA	0	0	NA	0	0	NA	0	0		1.72331	5.81788e-05	0.000538373
chr1_50_tRNAAsn_GTT+	TRN-GTT17-1	chr1:161591465-161591538	chr1	161591465	161591538	II	0.333333	4.56621	105	100	6.72338	129	100	7.01866	71	100	6.16323	6.63509		0	13	100	3.80735	15	100	4	15.0909	99.39	4.00809	3.93848		2.69661	0.000104536	0.000747434
chr1_51_Pseudo_CTT+	TRK-CTT13-1	chr1:165566150-165566222	chr1	165566150	165566222	II	1.71825	23.8646	625.468	5.91	9.28714	651.281	7.52	9.34556	264.815	7.93	8.04494	8.89255		0.111111	82.4195	15.77	6.38024	102.073	11.75	6.68594	59.6738	10.05	5.92029	6.32883		2.56372	0.00207978	0.00436083
chr1_52_tRNAPro_CGG+	TRP-CGG1-1	chr1:167683962-167684033	chr1	167683962	167684033	II	1.77283	24.9695	1614.29	14.06	10.656	1786.51	12.03	10.8023	669.099	30.18	9.3844	10.2809		0.460317	350.585	53.9	8.45585	340.568	52.26	8.41408	240.664	52.77	7.91413	8.26135		2.01955	0.00596509	0.00962763
chr1_65_tRNAPro_AGG-	TRP-AGG2-1	chr1:167684725-167684796	chr1	167684725	167684796	II	0.387121	5.4524	708.47	4.65	9.4698	774.686	2.83	9.5986	261.894	4.58	8.03621	9.03487		0.0575397	100.237	13.96	6.66073	103.937	14.43	6.71255	75.5859	17.19	6.25789	6.54372		2.49115	0.00337996	0.00624463
chr1_64_tRNAGlu_TTC-	TRE-TTC12-1	chr1:172157539-172157607	chr1	172157539	172157607	II	0.333333	4.90196	71.8333	84.91	6.17984	61.1667	86.64	5.95016	43.3833	87.59	5.46096	5.86365		0	25	96	4.70044	12.5	88	3.75489	12.5	96	3.75489	4.07007		1.79358	0.00365425	0.0065334
chr1_53_Pseudo_???+	TRU-NNN7-1	chr1:178678038-178678110	chr1	178678038	178678110	II	0	0	0	NA	0	0	NA	0	0	NA	0	0		0	0	NA	0	0	NA	0	0	NA	0	0		0	1	1
chr1_63_tRNAVal_AAC-	TRV-AAC7-1	chr1:180184276-180184348	chr1	180184276	180184348	II	0	0	10.8111	92.49	3.56194	13.625	95.41	3.86987	4	100	2.32193	3.25125		0	1	100	1	1.5	66.66	1.32193	1	100	1	1.10731		2.14394	0.00474526	0.00790747
chr1_54_tRNALys_TTT+	TRK-TTT3-1	chr1:204475655-204475727	chr1	204475655	204475727	II	2.60163	36.1338	1750.01	18.57	10.7718	1636.44	13.01	10.6749	1343.29	28.06	10.3898	10.6122		1.74885	628.46	57.91	9.29396	639.237	55.69	9.31851	548.635	60.33	9.09772	9.23673		1.37547	0.000151514	0.000902419
chr1_62_tRNALys_TTT-	TRK-TTT3-2	chr1:204476158-204476230	chr1	204476158	204476230	II	1.80533	25.0741	1529.34	4.96	10.5779	1508.96	3.84	10.5586	1112.7	10.33	10.1188	10.4184		1.06433	368.19	24.44	8.52402	375.339	20.24	8.55177	297.328	23.54	8.21557	8.43045		1.98798	9.89762e-05	0.000714828
chr1_55_tRNALys_TTT+	TRK-TTT8-1	chr1:205443271-205443343	chr1	205443271	205443343	II	1.23192	17.11	1034.55	7.92	10.0145	1068.19	5.8	10.0606	617.687	14.57	9.27019	9.78176		0.737762	94.5258	34.91	6.56661	98.7258	22.28	6.62916	88.6043	34.98	6.47357	6.55645		3.22532	4.48868e-05	0.000471971
chr1_61_Pseudo_TGG-	TRP-TGG5-1	chr1:207178154-207178230	chr1	207178154	207178230	II	0	0	1	100	1	0	NA	0	0	NA	0	0.333333		0	0	NA	0	0	NA	0	0	NA	0	0		0.333333	0.324565	0.362035
chr1_56_tRNAThr_TGT+	TRT-TGT2-1	chr1:222638347-222638419	chr1	222638347	222638419	II	1.08333	15.0463	1200.99	31.8	10.2299	1205.14	30.2	10.2349	669.286	45.42	9.38629	9.95036		0.333333	224.083	78.54	7.81216	206.119	75.68	7.69193	160.869	79.56	7.33563	7.61324		2.33712	0.000503522	0.00177735
5S_rRNA-related_1	RN5S1@	chr1:228746011-228746133	chr1	228746011	228746133	I	316.095	2590.94	12336.6	0	13.5533	12047.1	0	13.5182	4444.26	0	12.0116	13.0277		47.7176	3646.98	0	11.8139	2354.08	0	11.172	1627.91	0	10.6268	11.2042		1.82347	0.0221828	0.0296539
5S_rRNA-related_2	RN5S1@	chr1:228748252-228748374	chr1	228748252	228748374	I	316.095	2590.94	12336.6	0	13.5533	12047.1	0	13.5182	4444.26	0	12.0116	13.0277		47.7176	3646.98	0	11.8139	2354.08	0	11.172	1627.91	0	10.6268	11.2042		1.82347	0.0221828	0.0296539
5S_rRNA-related_3	RN5S1@	chr1:228750493-228750615	chr1	228750493	228750615	I	316.095	2590.94	12336.6	0	13.5533	12047.1	0	13.5182	4444.26	0	12.0116	13.0277		47.7176	3646.98	0	11.8139	2354.08	0	11.172	1627.91	0	10.6268	11.2042		1.82347	0.0221828	0.0296539
5S_rRNA-related_4	RN5S1@	chr1:228752734-228752856	chr1	228752734	228752856	I	316.332	2592.89	12337.6	0	13.5534	12047.8	0	13.5182	4444.77	0	12.0117	13.0278		47.7176	3647.99	0	11.8143	2354.25	0	11.1721	1628.45	0	10.6273	11.2046		1.82322	0.0221916	0.0296539
5S_rRNA-related_5	RN5S1@	chr1:228754975-228755097	chr1	228754975	228755097	I	316.095	2590.94	12336.6	0	13.5533	12047.1	0	13.5182	4444.26	0	12.0116	13.0277		47.7176	3646.98	0	11.8139	2354.08	0	11.172	1627.91	0	10.6268	11.2042		1.82347	0.0221828	0.0296539
5S_rRNA-related_6	RN5S1@	chr1:228757190-228757312	chr1	228757190	228757312	I	316.332	2592.89	12337.6	0	13.5534	12047.8	0	13.5182	4444.77	0	12.0117	13.0278		47.7176	3647.99	0	11.8143	2354.25	0	11.1721	1628.45	0	10.6273	11.2046		1.82322	0.0221916	0.0296539
RN5S_1	RN5S1@	chr1:228759411-228759532	chr1	228759411	228759532	I	316.378	2614.7	12338.4	0	13.5535	12047.8	0	13.5182	4445.02	0	12.0118	13.0278		47.7176	3648.16	0	11.8144	2354.38	0	11.1722	1628.45	0	10.6273	11.2046		1.82322	0.022192	0.0296539
RN5S_2	RN5S1@	chr1:228761653-228761774	chr1	228761653	228761774	I	316.141	2612.74	12337.4	0	13.5534	12047.4	0	13.5182	4444.44	0	12.0117	13.0278		47.7176	3647.16	0	11.814	2354.21	0	11.1721	1627.84	0	10.6267	11.2043		1.82349	0.0221849	0.0296539
RN5S_3	RN5S1@	chr1:228763892-228764013	chr1	228763892	228764013	I	864.846	7147.49	43747.8	71.48	15.3882	51852.7	71.42	15.6379	24277.9	71.45	14.5151	15.1804		154.379	23172.2	69.44	14.4905	15690.3	72.05	13.9234	10356	71.33	13.3167	13.9102		1.27018	0.0337239	0.0434461
RN5S_4	RN5S1@	chr1:228766134-228766255	chr1	228766134	228766255	I	316.141	2612.74	12337.4	0	13.5534	12047.4	0	13.5182	4444.44	0	12.0117	13.0278		47.7176	3647.16	0	11.814	2354.21	0	11.1721	1627.84	0	10.6267	11.2043		1.82349	0.0221849	0.0296539
RN5S_5	RN5S1@	chr1:228768375-228768496	chr1	228768375	228768496	I	316.141	2612.74	12337.4	0	13.5534	12047.4	0	13.5182	4444.44	0	12.0117	13.0278		47.7176	3647.16	0	11.814	2354.21	0	11.1721	1627.84	0	10.6267	11.2043		1.82349	0.0221849	0.0296539
RN5S_6	RN5S1@	chr1:228770615-228770736	chr1	228770615	228770736	I	316.141	2612.74	12337.4	0	13.5534	12047.4	0	13.5182	4444.44	0	12.0117	13.0278		47.7176	3647.16	0	11.814	2354.21	0	11.1721	1627.84	0	10.6267	11.2043		1.82349	0.0221849	0.0296539
RN5S_7	RN5S1@	chr1:228772840-228772961	chr1	228772840	228772961	I	316.141	2612.74	12337.4	0	13.5534	12047.4	0	13.5182	4444.44	0	12.0117	13.0278		47.7176	3647.16	0	11.814	2354.21	0	11.1721	1627.84	0	10.6267	11.2043		1.82349	0.0221849	0.0296539
RN5S_8	RN5S1@	chr1:228775081-228775202	chr1	228775081	228775202	I	316.141	2612.74	12337.4	0	13.5534	12047.4	0	13.5182	4444.44	0	12.0117	13.0278		47.7176	3647.16	0	11.814	2354.21	0	11.1721	1627.84	0	10.6267	11.2043		1.82349	0.0221849	0.0296539
RN5S_9	RN5S1@	chr1:228777312-228777433	chr1	228777312	228777433	I	318.134	2629.2	12342.1	0	13.5537	12051.6	0	13.5185	4445.49	0	12.0113	13.0279		47.8039	3648.13	0	11.8143	2356.23	0	11.1733	1628.36	0	10.6271	11.2049		1.82293	0.02223	0.0296539
RN5S_10	RN5S1@	chr1:228779553-228779674	chr1	228779553	228779674	I	318.134	2629.2	12342.1	0	13.5537	12051.6	0	13.5185	4445.49	0	12.0113	13.0279		47.8039	3648.13	0	11.8143	2356.23	0	11.1733	1628.36	0	10.6271	11.2049		1.82293	0.02223	0.0296539
RN5S_11	RN5S1@	chr1:228781784-228781905	chr1	228781784	228781905	I	316.141	2612.74	12337.4	0	13.5534	12047.4	0	13.5182	4444.44	0	12.0117	13.0278		47.7176	3647.16	0	11.814	2354.21	0	11.1721	1627.84	0	10.6267	11.2043		1.82349	0.0221849	0.0296539
chr1_57_Pseudo_TGG+	NMTRP-TGG1-1	chr1:238105862-238105933	chr1	238105862	238105933	II	0	0	0	NA	0	0	NA	0	0	NA	0	0		0	0	NA	0	0	NA	0	0	NA	0	0		0	1	1
chr1_60_Pseudo_TAA-	NMTRL-TAA3-1	chr1:238106956-238107030	chr1	238106956	238107030	II	1.55556	21.021	205.726	0.48	7.68065	92.1012	0	6.51644	285.944	0.34	8.15677	7.45129		0.611111	306.569	0.97	8.26188	272.667	0.36	8.09304	250.278	0	7.96961	8.10817		-0.656887	0.203563	0.23325
chr1_58_tRNALeu_CAA_I+	TRL-CAA4-1	chr1:249168054-249168159	chr1	249168054	249168159	II	16.5389	157.513	4537.22	68.69	12.1426	4300.19	66.6	12.065	4361.17	65.78	12.0854	12.0977		18.9556	3404.65	62.94	11.7257	2680.09	67.27	11.3784	1919.69	69.17	10.8931	11.3324		0.765274	0.019541	0.0272886
chr1_59_tRNAGlu_CTC+	TRE-CTC2-1	chr1:249168447-249168518	chr1	249168447	249168518	II	48.8158	687.546	1864.35	26.44	10.827	1518.63	28.05	10.5224	1827.1	28.51	10.7971	10.7155		16.8331	1415.58	32.7	10.4509	1172.07	33.1	10.1752	890.449	34.02	9.7725	10.1329		0.582595	0.0365122	0.0466799
chr2_1_Pseudo_CCC+	TRG-CCC7-1	chr2:11691827-11691898	chr2	11691827	11691898	II	1.66667	23.4742	81.5455	96.87	6.33759	60.2299	92.97	5.89611	46.8306	96.09	5.52868	5.92079		0.384615	45.3336	97.05	5.52199	41.3281	99.2	5.39025	20.0087	94.95	4.36597	5.09274		0.828053	0.090391	0.107716
chr2_2_tRNATyr_GTA_I+	TRY-GTA2-1	chr2:27273650-27273738	chr2	27273650	27273738	II	18.0278	204.861	12155	78.61	13.5672	12269.6	80.02	13.5808	11715.2	81.12	13.514	13.554		1.13333	10817.3	86.02	13.401	9546.75	86.09	13.2208	7196.75	86.96	12.8131	13.145		0.40904	0.0579424	0.0711835
chr2_3_tRNAAla_AGC+	TRA-AGC8-1	chr2:27274082-27274154	chr2	27274082	27274154	II	0.277778	3.85802	263.75	58.76	8.04698	218.3	69.62	7.77494	281.817	52.51	8.14228	7.98807		0	140.483	59.79	7.14445	146.167	65.67	7.20124	115.467	66.68	6.86369	7.0698		0.91827	0.00159076	0.00356549
chr2_4_tRNALeu_AAG+	TRL-AAG5-1	chr2:30277568-30277640	chr2	30277568	30277640	II	0	0	7.28571	96.07	3.04963	10	100	3.45943	4	100	2.32193	2.94366		0	1	100	1	0	NA	0	1	100	1	0.666667		2.277	0.00324232	0.00603713
chr2_5_tRNAIle_TAT_I+	TRI-TAT2-1	chr2:43037676-43037768	chr2	43037676	43037768	II	4.92778	53.5628	5001.97	89.3	12.2871	5221.52	91.35	12.3492	3414.24	83.59	11.7357	12.124		3.68333	2260.53	90.19	11.1407	1991.74	90.02	10.9579	1443.12	88.97	10.4923	10.8636		1.26037	0.00429891	0.00735216
chr2_28_Pseudo_TTG-	TRQ-TTG5-1	chr2:45937441-45937513	chr2	45937441	45937513	II	0	0	1	100	1	0	NA	0	1	100	1	0.666667		0	0	NA	0	0	NA	0	0	NA	0	0		0.666667	0.0810732	0.0972606
AluY_SINE_Alu_62819118	N/A	chr2:62819118-62819430	chr2	62819118	62819430	II	2.03333	6.51709	54.5853	76.94	5.74272	72.0993	72.12	6.1509	27.8033	79.12	4.74237	5.54533		0.283846	24.622	85.28	4.66353	18.6702	91.05	4.27749	13.3178	90.1	3.81079	4.2506		1.29473	0.0327921	0.0424752
chr2_27_tRNAGly_CCC-	TRG-CCC2-1	chr2:70476123-70476193	chr2	70476123	70476193	II	36.5	521.429	5370.77	8.41	12.3813	5004.83	9.07	12.2788	3336.6	11.86	11.6887	12.1163		10.1667	1926.33	15.93	10.9048	1833.33	18.21	10.833	1494.17	16.53	10.5362	10.758		1.3583	0.00190198	0.00405945
chr2_26_Pseudo_???-	TRU-NNN9-1	chr2:70663957-70664027	chr2	70663957	70664027	II	0	0	0	NA	0	0	NA	0	0	NA	0	0		0	0	NA	0	0	NA	0	0	NA	0	0		0	1	1
chr2_25_Pseudo_CTC-	TRE-CTC15-1	chr2:71273488-71273560	chr2	71273488	71273560	II	6.33333	87.963	169.595	65.45	7.35981	311.003	91.63	8.25582	157.492	68.57	7.24941	7.62168		0.285185	328.972	94.23	8.36495	243.957	95.09	7.93467	193.676	92.42	7.60279	7.96747		-0.345791	0.372809	0.408831
chr2_6_tRNAGlu_TTC+	TRE-TTC13-1	chr2:75124046-75124114	chr2	75124046	75124114	II	0	0	1	100	1	3	100	2	2	100	1.58496	1.52832		0	1	100	1	3	100	2	0	NA	0	1		0.528321	0.407744	0.445776
chr2_7_Pseudo_AGG+	TRP-AGG5-1	chr2:77895593-77895663	chr2	77895593	77895663	II	0	0	0.5	0	0.584963	0	NA	0	0	NA	0	0.194988		0.333333	0	NA	0	0	NA	0	0	NA	0	0		0.194988	0.336934	0.371198
chr2_8_Pseudo_AGG+	TRP-AGG4-1	chr2:87339573-87339644	chr2	87339573	87339644	II	0	0	0.5	0	0.584963	0	NA	0	0	NA	0	0.194988		0.333333	0	NA	0	0	NA	0	0	NA	0	0		0.194988	0.336934	0.371198
chr2_24_Pseudo_CTC-	TRE-CTC13-1	chr2:96217194-96217265	chr2	96217194	96217265	II	1.69444	23.8654	89.0318	97.71	6.46494	75.4333	98.09	6.22374	86.2803	97.35	6.41931	6.36933		0	45.6187	96.45	5.54257	45.8929	95.87	5.55121	24.4409	98.19	4.66903	5.25427		1.11507	0.0103236	0.0155397
chr2_9_Pseudo_TAA+	NMTRL-TAA2-1	chr2:117781417-117781491	chr2	117781417	117781491	II	0	0	1.5	0	1.32193	0.809524	0	0.847997	1.33333	0	1.22033	1.13008		0	1.94444	0	1.55582	0.833333	0	0.871844	0.777778	0	0.823749	1.0838		0.0462819	0.863113	0.902231
chr2_23_tRNAGln_TTG-	NMTRQ-TTG3-1	chr2:117782509-117782580	chr2	117782509	117782580	II	0.333333	4.69484	94	100	6.56478	103	100	6.69581	63	100	5.99247	6.41769		2.66667	12	100	3.36923	9	100	2.87447	6	100	2.11548	2.78639		3.63129	0.000243282	0.00114439
chr2_22_Pseudo_TTG-	NMTRQ-TTG7-1	chr2:131029911-131029982	chr2	131029911	131029982	II	6.97222	98.2003	959.276	5.21	9.89679	1216.91	5.34	10.2419	558.788	11.09	9.11064	9.74978		6.75	232.691	21.91	7.82619	157.307	18.43	7.24368	110.974	13.51	6.71731	7.26239		2.48738	0.00205602	0.00433151
chr2_21_tRNASer_TGA-	NMTRS-TGA1-1	chr2:131033024-131033093	chr2	131033024	131033093	II	0	0	0	NA	0	0	NA	0	0	NA	0	0		0	0	NA	0	0	NA	0	0	NA	0	0		0	1	1
chr2_20_tRNAGlu_TTC-	TRE-TTC1-1	chr2:131094701-131094772	chr2	131094701	131094772	II	14.1667	199.531	4862.77	74.31	12.2436	4583.63	75.2	12.1581	4205.15	74.38	12.0334	12.1451		9.58333	2660.2	81	11.3727	2938.5	85.48	11.5166	1989.12	83.4	10.9517	11.2803		0.86474	0.00402337	0.00698231
chr2_10_Pseudo_TGA+	NMTRS-TGA2-1	chr2:132140142-132140211	chr2	132140142	132140211	II	0	0	0	NA	0	0	NA	0	0	NA	0	0		0	0	NA	0	0	NA	0	0	NA	0	0		0	1	1
chr2_11_Pseudo_TTG+	NMTRQ-TTG9-1	chr2:132143133-132143204	chr2	132143133	132143204	II	7.41667	104.46	2029	10.79	10.982	2279.44	13.07	11.1504	1319.83	15.07	10.3591	10.8305		8.32222	330.569	24.8	8.33646	251.97	25	7.93458	164.504	17.62	7.29627	7.85577		2.97472	0.000407712	0.00154613
hsa-mir-1978	N/A	chr2:149639365-149639417	chr2	149639365	149639417	other	30.5	586.538	5451.83	4.53	12.4047	3185.67	4.58	11.624	6451.76	5.54	12.6489	12.2258		21.8333	5779.81	4.82	12.4916	6326.14	4.53	12.6224	4766.5	4.59	12.2124	12.4421		-0.216275	0.508342	0.547386
chr2_12_Pseudo_CTC+	TRE-CTC9-1	chr2:151219277-151219349	chr2	151219277	151219349	II	1.20833	16.7824	64.854	97.14	6.01443	93.6012	98.28	6.54525	97.2222	78.17	6.60011	6.3866		0.380952	52.125	99.76	5.72083	51.7722	84.98	5.71122	28	100	4.83895	5.42367		0.96293	0.0292649	0.038253
chr2_13_tRNAAla_CGC+	TRA-CGC3-1	chr2:157257281-157257352	chr2	157257281	157257352	II	3.66667	51.6432	1703.97	97.53	10.7324	1317.46	97.38	10.3606	1192.8	96.32	10.2169	10.4366		1.33333	684.435	97.89	9.41806	740.036	98.64	9.53079	484.375	98.27	8.91897	9.28927		1.14738	0.00390894	0.00683348
chr2_19_tRNAGly_GCC-	TRG-GCC2-2	chr2:157257659-157257729	chr2	157257659	157257729	II	33.3256	476.08	2825.53	11.99	11.4477	2483.55	10.46	11.2593	2155.43	9.6	11.052	11.253		9.25531	1571.08	8.52	10.6099	1443.02	11.71	10.4866	1149.62	12.35	10.1566	10.4177		0.835292	0.00436834	0.00741892
chr2_18_Pseudo_CTC-	TRE-CTC7-1	chr2:159738171-159738242	chr2	159738171	159738242	II	0	0	11.8333	25.35	3.68145	33.8333	41.37	5.12226	8.33333	36	3.22188	4.00853		0.166667	10.5	95.23	3.5025	10.5	76.19	3.5025	13.3333	90	3.82409	3.6097		0.398832	0.483743	0.522472
chr2_17_Pseudo_TTC-	TRE-TTC9-1	chr2:204229131-204229201	chr2	204229131	204229201	II	5.69188	81.3125	201.134	69.1	7.61797	363.695	67.91	8.48785	304.425	76.2	8.22754	8.11112		0	599.347	87.26	9.22964	420.093	84.74	8.71798	412.501	84.12	8.69174	8.87979		-0.768669	0.0437792	0.0550125
chr2_14_tRNATyr_ATA_I+	TRY-ATA1-1	chr2:219110549-219110641	chr2	219110549	219110641	II	0	0	451.383	68.45	8.82139	398.933	66.42	8.6436	364.5	64.47	8.51373	8.65957		0	13.25	67.92	3.83289	24.3595	77.99	4.66391	12.0167	74.89	3.70155	4.06612		4.59346	1.94969e-05	0.000368153
chr2_15_Pseudo_CTG+	TRQ-CTG16-1	chr2:219491132-219491207	chr2	219491132	219491207	II	0.166667	2.22222	1	100	0.874469	0	NA	0	3	100	1.9386	0.93769		0	0	NA	0	0	NA	0	0	NA	0	0		0.93769	0.124655	0.145634
chr2_16_Pseudo_TTT-	TRK-TTT15-1	chr2:224186315-224186387	chr2	224186315	224186387	II	0	0	4	100	2.32193	5	100	2.58496	0	NA	0	1.63563		0	2	100	1.58496	5	100	2.58496	6	100	2.80735	2.32576		-0.69013	0.436233	0.473303
chr3_1_Pseudo_CTA+	TR*-CTA2-1	chr3:13833886-13833953	chr3	13833886	13833953	II	0	0	0	NA	0	0	NA	0	0	NA	0	0		0	0	NA	0	0	NA	0	0	NA	0	0		0	1	1
chr3_12_Pseudo_GCA-	TRC-GCA25-1	chr3:17741392-17741464	chr3	17741392	17741464	II	0.666667	9.25926	22.9323	47.96	4.53999	37.9739	60.56	5.2594	14.6679	34.08	3.90625	4.56854		0	6.41732	46.74	2.88947	4.30904	23.2	2.40599	4.81455	62.31	2.53854	2.61133		1.95721	0.00370444	0.0065825
chr3_11_tRNAArg_ACG-	TRR-ACG2-1	chr3:45730491-45730563	chr3	45730491	45730563	II	2.26099	31.4027	1042.74	36.73	10.0244	1038.1	35.64	10.018	659.796	32.88	9.36311	9.80184		0.592472	290.377	40.29	8.18378	275.102	41.07	8.10596	214.084	42.97	7.74477	8.0115		1.79034	0.000696332	0.00223153
chr3_10_Pseudo_CTC-	TRE-CTC12-1	chr3:103879524-103879595	chr3	103879524	103879595	II	41.3398	582.251	1329.31	72.44	10.332	2001.68	92.47	10.9376	1250.55	76.36	10.241	10.5036		1.7	1320.03	92.72	10.3656	1049.79	91.54	10.0349	842.5	91.63	9.71735	10.0393		0.464262	0.140323	0.163139
chr3_9_Pseudo_TTG-	NMTRQ-TTG4-1	chr3:106620878-106620949	chr3	106620878	106620949	II	0.266667	3.75587	37.8452	0	5.26953	57.2488	1.74	5.85732	45.4714	0	5.52993	5.55226		0.047619	6.45238	0	2.88817	4.37778	0	2.41233	5.375	37.2	2.66069	2.65373		2.89853	3.41183e-05	0.000408744
chr3_8_tRNAGlu_CTC-	TRE-CTC8-1	chr3:125413177-125413248	chr3	125413177	125413248	II	0	0	3	100	2	1	100	1	4	100	2.32193	1.77398		0	2	100	1.58496	0	NA	0	0	NA	0	0.528321		1.24566	0.0924027	0.10993
chr3_7_tRNACys_GCA-	TRC-GCA6-1	chr3:131947944-131948015	chr3	131947944	131948015	II	0.451923	6.36511	123.625	50.96	6.95621	112.404	34.69	6.81958	101.249	36.54	6.6695	6.8151		0.025641	31.684	47.34	5.02931	30.9939	48.39	4.9985	23.1449	56.16	4.59196	4.87325		1.94184	6.56356e-05	0.000562652
chr3_6_tRNACys_GCA-	TRC-GCA9-1	chr3:131950642-131950713	chr3	131950642	131950713	II	0.196958	2.77406	52.5635	34.24	5.73787	57.4114	34.83	5.86336	53.5655	35.47	5.76465	5.78863		0.0128205	13.6658	21.95	3.87283	15.981	25.02	4.08491	9.63632	20.75	3.40871	3.78882		1.99981	0.000146453	0.000894993
chr3_5_tRNALeu_AAG-	TRL-AAG8-1	chr3:148221228-148221309	chr3	148221228	148221309	II	0	0	8.5	94.11	3.24793	5	80	2.58496	8.5	82.35	3.24793	3.02694		0	3.5	57.14	2.16993	0.5	0	0.584963	2	100	1.58496	1.44662		1.58032	0.0196402	0.0273737
chr3_4_tRNAHis_GTG-	TRH-GTG3-1	chr3:148316563-148316634	chr3	148316563	148316634	II	0	0	7	100	3	2	100	1.58496	1	100	1	1.86165		0.333333	1	100	0.736966	0	NA	0	0	NA	0	0.245655		1.616	0.0393786	0.0499214
chr3_2_tRNAVal_AAC+	TRV-AAC1-1	chr3:169490018-169490090	chr3	169490018	169490090	II	0.709451	9.85348	1630.92	65.11	10.6717	1496.5	62.47	10.5477	1041.9	66.7	10.0254	10.4149		0.524351	622.975	76.56	9.28413	703.402	80.89	9.45919	509.45	77.33	8.99413	9.24581		1.16912	0.00344573	0.00631718
5S_rRNA-related_7	RN5S@	chr3:179879672-179879765	chr3	179879672	179879765	I	676.504	7274.24	35181	59.63	15.0745	41193.9	60.26	15.3063	20364.3	59.47	14.2651	14.882		92.2727	18538.9	55.76	14.1712	12863.1	57.44	13.6407	8422.48	56.27	13.0243	13.612		1.26992	0.0286857	0.0375646
RN5S_12	RN5S@	chr3:181540492-181540892	chr3	181540492	181540892	I	1011.23	2528.08	40964.5	97.06	15.2861	34803.1	96	15.0444	31787.7	97.44	14.9096	15.08		21.1056	19873.6	93.99	14.2771	16490.6	92.71	14.0076	11266	93.86	13.4571	13.9139		1.16609	0.00520435	0.00849568
chr3_3_tRNAAsp_GTC-	TRD-GTC6-1	chr3:184366095-184366165	chr3	184366095	184366165	II	0.333333	4.7619	1	100	0.736966	2.5	80	1.66297	0	NA	0	0.799977		0	0	NA	0	1	100	1	0	NA	0	0.333333		0.466644	0.419105	0.457496
FLAM_C_SINE_Alu	N/A	chr3:195871503-195871903	chr3	195871503	195871903	II	1.66667	4.16667	355.206	96	8.46978	424.454	96.12	8.72718	276.465	95.49	8.10744	8.4348		0.333333	47.7989	94.14	5.59862	39.3333	96.61	5.32181	36.3274	93.59	5.20893	5.37645		3.05835	2.37984e-05	0.000380508
chr4_5_Pseudo_TTA-	TR*-TTA3-1	chr4:7325838-7325909	chr4	7325838	7325909	II	0	0	5.375	93.02	2.67129	2.94444	67.92	1.9782	6.25	96	2.85798	2.50249		0	2.08333	96	1.62293	2.08333	96	1.62293	0.25	0	0.321928	1.18926		1.31323	0.0366523	0.0467138
chr4_4_tRNAGln_TTG-	TRQ-TTG6-1	chr4:40908743-40908815	chr4	40908743	40908815	II	0	0	12	100	3.70044	11	100	3.58496	8	100	3.16993	3.48511		0	5	100	2.58496	3	100	2	0	NA	0	1.52832		1.95679	0.0427185	0.0537741
GABRB1_Intronic(AluSp)	N/A	chr4:47121394-47121819	chr4	47121394	47121819	II	1.27778	3.00654	13.2333	45.34	3.69525	34.9926	68.58	5.11742	14.3167	83.81	3.81079	4.20782		0	16.5	84.84	4.12928	9.77778	92.04	3.42895	11.1583	53.77	3.60288	3.72037		0.487447	0.333909	0.370722
LNX1_Intronic(Alu_FLAM_C)	N/A	chr4:54345254-54345404	chr4	54345254	54345404	II	2.33333	15.5556	386.616	97.25	8.58975	350.404	97.88	8.44736	414.457	98.2	8.69041	8.57584		0	155.167	97.95	7.28688	108.979	98.18	6.78097	135.875	99.35	7.09666	7.05484		1.521	0.000210657	0.00105328
chr4_3_tRNACys_GCA-	TRC-GCA2-1	chr4:124430005-124430076	chr4	124430005	124430076	II	1.06944	15.0626	1960.69	43.35	10.9371	2534.7	79.06	11.3076	950.883	41.96	9.89302	10.7126		0.425641	582.79	71.72	9.18826	690.093	73.32	9.43185	427.199	73.97	8.74068	9.12026		1.5923	0.0137785	0.0201877
MIRb_SINE_MIR_146808377	N/A	chr4:146808377-146808458	chr4	146808377	146808458	II	0	0	66	100	6.06609	64	100	6.02237	61	100	5.9542	6.01422		0	50	100	5.67243	33	100	5.08746	21	100	4.45943	5.07311		0.941111	0.0331208	0.0427462
chr4_1_Pseudo_TTG+	NMTRQ-TTG15-1	chr4:156383888-156383959	chr4	156383888	156383959	II	0.266667	3.75587	38.6905	5.16	5.30098	57.8964	3.45	5.8734	46.2762	6.48	5.55469	5.57636		0.047619	6.58571	30.36	2.91329	6.44921	31.01	2.88622	4.30357	23.23	2.39323	2.73092		2.84544	5.3339e-05	0.000515848
chr4_2_tRNALeu_TAA-	NMTRL-TAA1-1	chr4:156384978-156385052	chr4	156384978	156385052	II	0	0	1.25	80	1.16993	0.125	0	0.163499	1	100	1	0.777808		0	1.125	88.88	1.08406	1	100	1	1	100	1	1.02802		-0.250214	0.422393	0.459681
chr5_24_tRNALys_CTT-	TRK-CTT9-1	chr5:26198539-26198611	chr5	26198539	26198611	II	0	0	16	100	4.08746	15	100	4	11	100	3.58496	3.89081		0	5	100	2.58496	6	100	2.80735	2	100	1.58496	2.32576		1.56505	0.00848423	0.0131588
chr5_23_Pseudo_TTG-	TRQ-TTG7-1	chr5:77318776-77318848	chr5	77318776	77318848	II	0	0	0	NA	0	0	NA	0	0	NA	0	0		0.333333	0	NA	0	0	NA	0	0	NA	0	0		0	1	1
HVG2_hsa-mir-886	N/A	chr5:135416177-135416297	chr5	135416177	135416297	II	35.1111	292.593	7118.92	71.44	12.7905	9084.58	65.66	13.1438	3754.92	76.37	11.8614	12.5986		2.83333	1847.43	86.93	10.8499	2033.67	85.46	10.9886	1362.23	86.54	10.4098	10.7494		1.84915	0.00488757	0.00804141
VTRNA1-1	VTRNA1-1	chr5:140090860-140090958	chr5	140090860	140090958	II	44.8333	457.483	17799.9	82.05	14.116	19077.5	81.1	14.2163	6803.88	85.43	12.7228	13.685		4.08333	2205.33	88.24	11.1048	2822.32	87.58	11.4611	2238.53	88.13	11.1263	11.2307		2.4543	0.00291508	0.00555808
VTRNA1-2	VTRNA1-2	chr5:140098510-140098598	chr5	140098510	140098598	II	24.5	278.409	15378	97.56	13.9064	20384.1	98.44	14.3135	7320.45	97.68	12.8331	13.6843		3	2730.5	98.8	11.4139	3418.7	99.07	11.7384	2255.58	98.91	11.138	11.4301		2.25422	0.00349364	0.00637233
VTRNA1-3	VTRNA1-3	chr5:140105743-140105831	chr5	140105743	140105831	II	23.1667	263.258	10623.3	68.83	13.3719	11182.6	67.59	13.4461	4001.49	75.62	11.9583	12.9254		2.66667	2111.07	88.29	11.0426	2660.19	87.17	11.3764	1686.03	85.34	10.718	11.0457		1.87978	0.0107135	0.0160928
chr5_22_tRNAAsp_GTC-	TRD-GTC5-1	chr5:141773988-141774059	chr5	141773988	141774059	II	14.9252	210.214	1031.09	75.26	9.99033	1337.25	85.99	10.37	840.582	73.04	9.69114	10.0171		5.45043	424.62	87.13	8.71485	351.518	86.48	8.43907	272.676	86.54	8.06731	8.40708		1.61006	0.00141543	0.0034599
chr5_21_Pseudo_CTG-	TRQ-CTG13-1	chr5:151248074-151248145	chr5	151248074	151248145	II	0.166667	2.34742	0	NA	0	0	NA	0	0	NA	0	0		0	0	NA	0	0	NA	0	0	NA	0	0		0	1	1
chr5_1_Pseudo_ACA_I+	TRC-ACA1-1	chr5:151988596-151988771	chr5	151988596	151988771	II	0.0416667	0.238095	152.506	79.34	7.26172	156.386	80.56	7.29774	101.907	74.57	6.68454	7.08133		0.0512821	47.5743	90.38	5.60061	35.8787	86.4	5.20255	34.5105	89.82	5.14826	5.31714		1.7642	0.000592714	0.00202514
chr5_20_tRNALeu_CAG-	TRL-CAG3-1	chr5:159392041-159392118	chr5	159392041	159392118	II	0	0	0	NA	0	0	NA	0	0	NA	0	0		0.333333	0	NA	0	0	NA	0	0	NA	0	0		0	1	1
chr5_2_tRNAVal_CAC+	TRV-CAC1-2	chr5:180524070-180524142	chr5	180524070	180524142	II	2.36794	32.888	1272.46	0	10.3119	1134.05	0	10.1455	989.291	0	9.94826	10.1352		1.25372	445.745	0	8.79925	431.903	0	8.75372	348.221	0	8.44282	8.66526		1.46995	0.000190801	0.00101156
chr5_19_tRNALeu_AAG-	TRL-AAG1-1	chr5:180524474-180524555	chr5	180524474	180524555	II	2.20766	27.255	520.8	0	9.02125	527.296	0	9.03916	414.896	0	8.69239	8.9176		0.381481	242.068	0	7.92291	195.443	0	7.61515	133.908	0	7.07168	7.53658		1.38102	0.00285468	0.00550835
chr5_3_tRNALeu_AAG+	TRL-AAG1-2	chr5:180528840-180528921	chr5	180528840	180528921	II	2.20766	27.255	526.3	0	9.03644	534.796	0	9.05958	415.896	0	8.69588	8.93063		0.381481	242.568	0	7.92588	195.443	0	7.61515	133.908	0	7.07168	7.53757		1.39306	0.00286491	0.00550835
chr5_18_tRNAVal_CAC-	TRV-CAC1-3	chr5:180529253-180529325	chr5	180529253	180529325	II	2.36794	32.888	1271.96	0	10.3113	1133.55	0	10.1449	987.791	0	9.94607	10.1341		1.25372	445.745	0	8.79925	431.403	0	8.75205	348.221	0	8.44282	8.6647		1.46938	0.00019203	0.00101156
chr5_4_tRNAVal_AAC+	TRV-AAC1-2	chr5:180591154-180591226	chr5	180591154	180591226	II	0.376118	5.22385	738.655	16.92	9.52998	704.011	16.19	9.46074	448.556	14.26	8.81115	9.26729		0.191017	204.294	13.21	7.68021	191.015	15.7	7.58363	167.091	17.35	7.39149	7.55178		1.71551	0.000669677	0.00220368
chr5_17_Pseudo_AAG-	TRL-AAG7-1	chr5:180591564-180591645	chr5	180591564	180591645	II	0	0	69	98.55	6.12928	56.8333	96.77	5.85375	72.6	99.17	6.20163	6.06155		0	63.5	99.21	6.01123	47.5333	98.87	5.6008	34.2667	99.22	5.13996	5.584		0.477557	0.116812	0.137144
chr5_5_tRNAVal_AAC+	TRV-AAC1-3	chr5:180596610-180596682	chr5	180596610	180596682	II	0.376118	5.22385	854.439	27.38	9.73988	842.046	29.33	9.71882	537.29	27.91	9.07122	9.50998		0.524351	242.969	26.75	7.92742	230.722	29.9	7.853	181.83	24.19	7.51025	7.76356		1.74642	0.000736309	0.00229895
chr5_6_tRNAVal_CAC+	TRV-CAC1-4	chr5:180600650-180600722	chr5	180600650	180600722	II	6.49675	90.2327	3076.04	59.52	11.5843	3081.34	64.32	11.5868	1971.92	51.32	10.9414	11.3708		2.50239	791.443	45.1	9.6256	704.641	40.87	9.45767	654.94	48.7	9.35189	9.47839		1.89242	0.000320907	0.00134179
chr5_16_tRNALeu_AAG-	TRL-AAG1-3	chr5:180601044-180601125	chr5	180601044	180601125	II	2.32671	28.7248	465.473	4.29	8.85845	493.369	5.06	8.94263	410.667	9	8.67716	8.82608		0.381481	250.382	9.18	7.97154	202.387	12.35	7.66534	139.43	12.9	7.1298	7.58889		1.23719	0.00363361	0.0065334
chr5_7_tRNALeu_AAG+	TRL-AAG2-1	chr5:180614701-180614782	chr5	180614701	180614782	II	6.38067	78.7738	737.647	39.58	9.51622	693.787	35.45	9.42711	746.337	47.56	9.53324	9.49219		1.9791	567.815	42.26	9.14678	473.236	47.54	8.88342	396.094	53.52	8.62612	8.88544		0.606749	0.00970984	0.0147667
chr5_15_tRNAVal_AAC-	TRV-AAC2-1	chr5:180615416-180615488	chr5	180615416	180615488	II	1.91858	26.647	2252.56	79.28	11.1368	2360.51	79.77	11.2043	1244.85	82.41	10.2807	10.8739		0.0654762	580.623	91.79	9.18378	640.131	92.63	9.32433	508.471	92.43	8.99267	9.16693		1.707	0.00198455	0.00421054
chr5_14_tRNAPro_TGG-	TRP-TGG3-1	chr5:180615854-180615925	chr5	180615854	180615925	II	0.661724	9.32005	1949.79	9.64	10.9293	2352.67	4.93	11.2003	668.562	18.24	9.38565	10.5051		0.571429	164.819	24.87	7.36842	202.343	29.15	7.6637	152.464	34.76	7.25635	7.42949		3.0756	0.00211388	0.00439367
chr5_13_tRNAThr_TGT-	TRT-TGT6-1	chr5:180618687-180618758	chr5	180618687	180618758	II	2.25	31.6901	1272.98	54.28	10.3126	1055.63	50.68	10.0422	1245.37	61.18	10.2809	10.2119		0.0666667	907.994	59.91	9.82801	856.939	66.04	9.7446	603.229	67.3	9.23877	9.6038		0.608088	0.0245421	0.0325558
chr5_8_tRNAAla_TGC+	TRA-TGC3-1	chr5:180633868-180633939	chr5	180633868	180633939	II	3.83333	53.9906	538.21	19.88	9.06439	475.293	21.67	8.88405	403.809	18.32	8.64735	8.86526		1.85079	195.967	35.72	7.60817	172.013	37.78	7.41923	114.346	27.11	6.82646	7.28462		1.58064	0.00137543	0.00340288
chr5_9_tRNALys_CTT+	TRK-CTT2-2	chr5:180634755-180634827	chr5	180634755	180634827	II	22.2791	309.432	5388.5	14.58	12.39	5071.59	15.18	12.3022	4490.99	17.47	12.126	12.2727		10.2678	1436.38	40.51	10.4789	1645.77	42.47	10.6764	1249.46	43.29	10.2764	10.4772		1.79548	4.88915e-05	0.000499391
chr5_12_tRNAVal_AAC-	TRV-AAC1-4	chr5:180645270-180645342	chr5	180645270	180645342	II	1.39834	19.4214	1167.6	50.7	10.1888	1156.83	51.69	10.1755	796.461	55.74	9.63675	10.0003		0.160714	443.161	65.89	8.79443	451.226	69.14	8.82038	344.552	65.3	8.4321	8.6823		1.31805	0.00144486	0.0034599
chr5_11_tRNALys_CTT-	TRK-CTT2-3	chr5:180648979-180649051	chr5	180648979	180649051	II	11.0843	153.949	4821.31	4.58	12.2322	4611.38	6.63	12.1678	3900.84	4.99	11.9258	12.1086		7.43373	969.289	10.62	9.91117	1088.36	11.76	10.0794	819.03	11.47	9.66641	9.88566		2.22296	2.5063e-05	0.000380508
chr5_10_tRNAVal_CAC-	TRV-CAC1-5	chr5:180649395-180649467	chr5	180649395	180649467	II	3.73286	51.8453	1602.71	10.54	10.6438	1392.27	9.48	10.4404	1230.87	14.46	10.2623	10.4488		1.2061	611.94	21.08	9.25674	626.047	26.67	9.28964	476.112	22.05	8.89453	9.14697		1.30185	0.000486803	0.00174907
chr6_1_tRNAGln_CTG+	TRQ-CTG1-1	chr6:18836402-18836473	chr6	18836402	18836473	II	13.0921	184.396	7193.9	0.05	12.8101	7128.88	0.07	12.797	2130.62	0.32	11.0488	12.2187		4.37472	819.988	0.12	9.67351	1076.3	0.18	10.0673	864.983	0.11	9.7509	9.83058		2.38808	0.0071078	0.0112609
chr6_2_tRNAMet_CAT+	TRX-CAT1-2	chr6:26286754-26286825	chr6	26286754	26286825	II	6.41495	90.3514	2013.09	1.58	10.9713	1486.14	1.21	10.5321	1705.4	1.52	10.7313	10.7449		2.85833	690.402	3.91	9.42741	697.478	2.86	9.44215	593.316	5.05	9.20813	9.35923		1.38568	0.000215604	0.00105939
chr6_3_tRNAArg_TCG+	TRR-TCG4-1	chr6:26299905-26299977	chr6	26299905	26299977	II	0.12037	1.67181	431.865	27.78	8.75736	378.808	22.7	8.56864	420.818	31.6	8.72004	8.68201		0.307407	62.4484	48.03	5.98033	79.0528	56.92	6.31729	61.7429	55.06	5.96424	6.08729		2.59472	5.96345e-06	0.000284258
chr6_175_tRNASer_GCT-	TRS-GCT6-1	chr6:26305718-26305801	chr6	26305718	26305801	II	19.6333	236.546	2969.91	85.72	11.5271	2887.73	87.36	11.4864	3685.3	90.08	11.8403	11.6179		2.63977	1838.53	92.24	10.8431	2345.27	94.61	11.1945	1964.02	95.72	10.9384	10.992		0.625929	0.00847235	0.0131588
chr6_174_tRNAGln_TTG-	TRQ-TTG3-1	chr6:26311424-26311495	chr6	26311424	26311495	II	4.08333	57.5117	3386.82	3.39	11.7244	3486.5	2.49	11.7663	1189.5	6.38	10.2124	11.2344		1.60556	300.23	4.33	8.22697	413.567	6.52	8.68985	373.267	5.09	8.5417	8.48617		2.74819	0.00235826	0.00485666
chr6_173_tRNAGln_TTG-	TRQ-TTG3-2	chr6:26311975-26312046	chr6	26311975	26312046	II	4.36111	61.4241	3289.44	2.06	11.6821	3402.76	1.93	11.7311	1141.19	3.76	10.1521	11.1884		1.10556	301.944	4.63	8.23762	409.624	6.1	8.67778	362.423	4.96	8.50111	8.47217		2.71626	0.00258226	0.00517176
chr6_172_tRNASer_TGA-	TRS-TGA3-1	chr6:26312824-26312905	chr6	26312824	26312905	II	1.57332	19.4237	576.814	49.92	9.17053	503.458	49.85	8.97407	607.394	50.37	9.24512	9.12991		0.240138	206.212	70.8	7.6933	215.224	68.3	7.75478	150.239	63.23	7.23834	7.56214		1.56777	0.000285788	0.00129114
chr6_171_tRNAMet_CAT-	TRX-CAT1-3	chr6:26313352-26313423	chr6	26313352	26313423	II	7.9586	112.093	2095.16	6.2	11.028	1533.52	5.28	10.5761	1766.61	5.43	10.7811	10.7951		3.60278	803.41	17.79	9.6453	806.829	16.6	9.65145	639.217	12.35	9.31427	9.537		1.25806	0.000626134	0.00211173
chr6_170_tRNATrp_CCA-	TRW-CCA3-1	chr6:26319330-26319401	chr6	26319330	26319401	II	0.455556	6.41628	225.695	26.58	7.82169	226.82	29.97	7.82888	194.611	41.62	7.60849	7.75302		0.265079	80.0476	37.47	6.33593	68.0119	38.22	6.10329	52.5976	39.92	5.73688	6.0587		1.69432	0.000232686	0.00110179
chr6_4_tRNAArg_TCG+	TRR-TCG2-1	chr6:26323046-26323118	chr6	26323046	26323118	II	1.12037	15.5607	517.464	35.55	9.01497	465.559	36.73	8.86242	519.431	41.19	9.02045	8.96595		4.30741	145.741	76.16	7.15414	164.053	78.63	7.32862	127.544	74.48	6.95691	7.14656		1.81939	2.47259e-05	0.000380508
chr6_5_tRNASer_AGA+	TRS-AGA2-1	chr6:26327817-26327898	chr6	26327817	26327898	II	6.80665	84.0327	4073.63	93.92	11.99	3782.43	94.17	11.8829	4825.62	95.51	12.2348	12.0359		2.87903	1443.54	93.45	10.4935	1502.78	94.09	10.5516	1145.25	93.86	10.1591	10.4014		1.63449	0.000139035	0.000872015
chr6_6_tRNAArg_ACG+	TRR-ACG1-1	chr6:26328368-26328440	chr6	26328368	26328440	II	1.30544	18.131	803.138	59.76	9.64895	656.54	56.81	9.35808	826.469	68.6	9.69028	9.56577		0.683742	481.398	78.52	8.91202	479.48	78.41	8.90626	405.107	83.43	8.66327	8.82718		0.738585	0.00252617	0.00508791
chr6_169_tRNAMet_CAT-	TRX-CAT1-4	chr6:26330529-26330600	chr6	26330529	26330600	II	6.76217	95.2418	2158.31	8.01	11.0718	1633.96	9.97	10.6691	1879.27	10.85	10.8715	10.8708		3.38056	832.758	19.57	9.69762	826.814	18.02	9.68726	685.137	17.66	9.41522	9.60003		1.27077	0.00033056	0.00134179
chr6_168_tRNATrp_CCA-	TRW-CCA3-2	chr6:26331672-26331743	chr6	26331672	26331743	II	0.122222	1.72144	235.905	29.24	7.8874	192.843	17.11	7.59783	152.513	26.22	7.26106	7.5821		0.265079	85.7476	41.98	6.43429	79.7119	46.41	6.33002	47.4976	35.79	5.59186	6.11872		1.46337	0.00433046	0.00737209
chr6_7_tRNALeu_CAG+	TRL-CAG1-7	chr6:26521436-26521518	chr6	26521436	26521518	II	2.30991	28.1696	793.193	30	9.62915	787.923	30.58	9.61952	595.645	26.35	9.21514	9.48793		0.647884	396.692	20.41	8.63315	379.656	26.07	8.56987	258.942	24.32	8.01844	8.40715		1.08078	0.00466493	0.00782964
chr6_167_tRNAThr_AGT-	TRT-AGT2-1	chr6:26533145-26533218	chr6	26533145	26533218	II	1.95833	26.8265	354.35	55.31	8.46509	261.621	44.72	8.02604	609.597	74.96	9.24943	8.58019		0.19697	503.308	91.59	8.97758	535.81	91.63	9.06771	430.017	91.15	8.75092	8.93207		-0.351881	0.345285	0.379814
chr6_8_tRNAArg_ACG+	TRR-ACG1-2	chr6:26537726-26537798	chr6	26537726	26537798	II	1.88624	26.1978	870.652	56.96	9.76449	698.379	53.69	9.44603	984.457	70.08	9.94188	9.71747		0.683742	539.519	77.29	9.07636	555.094	77.64	9.11741	414.751	81.49	8.69721	8.96366		0.753807	0.00994163	0.0150599
chr6_9_tRNAVal_CAC+	TRV-CAC1-6	chr6:26538282-26538354	chr6	26538282	26538354	II	2.99212	41.5573	1457.34	3.08	10.5071	1317.71	4.02	10.3616	1083.71	5.16	10.0791	10.316		1.25372	521.482	10.35	9.02578	494.248	10.52	8.94834	397.496	9.05	8.63387	8.86933		1.44663	0.000342951	0.00134179
chr6_10_tRNAAla_CGC+	TRA-CGC1-1	chr6:26553731-26553802	chr6	26553731	26553802	II	4.77778	67.2926	439.194	53.27	8.76624	390.996	56.26	8.59698	454.105	65.62	8.81482	8.72601		2.52857	223.679	71.08	7.79535	227.556	75.14	7.82033	183.37	77.98	7.50655	7.70741		1.01861	0.000408699	0.00154613
chr6_11_tRNAIle_AAT+	TRI-AAT5-1	chr6:26554350-26554423	chr6	26554350	26554423	II	2.40609	32.9602	429.872	42.1	8.74305	310.815	28.31	8.27338	486.002	52.46	8.92065	8.64569		0.621325	339.945	66.77	8.41076	289.84	66.24	8.18102	229.397	68.44	7.84407	8.14528		0.500409	0.0867049	0.103496
chr6_12_tRNAPro_AGG+	TRP-AGG2-2	chr6:26555498-26555569	chr6	26555498	26555569	II	0.320454	4.51344	693.671	3.31	9.43953	773.067	2.58	9.59571	279.958	11.43	8.13254	9.05593		0.015873	106.351	19.74	6.746	102.327	14.65	6.69079	80.933	22.24	6.35609	6.59762		2.4583	0.00251528	0.00508791
chr6_13_tRNALys_CTT+	TRK-CTT2-4	chr6:26556774-26556846	chr6	26556774	26556846	II	16.8716	234.328	5510.01	5.04	12.4237	5580.74	5.62	12.4421	4732.12	7.64	12.2034	12.3564		8.01178	1670.14	16.58	10.6997	1762.85	16.45	10.7779	1530.84	18.29	10.5735	10.6837		1.67271	1.73001e-05	0.000368153
chr6_14_tRNATyr_GTA_I+	TRY-GTA1-1	chr6:26569086-26569176	chr6	26569086	26569176	II	3.11111	34.5679	3560.62	46.59	11.7971	5033.11	73.79	12.2966	3101.93	44.9	11.598	11.8972		1.25	3159.48	81.18	11.6254	2835.06	81.83	11.469	2053.82	82.67	11.0039	11.3661		0.531115	0.0944005	0.111934
chr6_166_tRNAAla_AGC-	TRA-AGC11-1	chr6:26572092-26572164	chr6	26572092	26572164	II	0.777778	10.8025	100.617	46.71	6.65583	83.0667	49.35	6.37996	90.0667	42.19	6.49639	6.51072		0	49.9833	68.02	5.67186	43.8333	63.87	5.48639	39.6333	63.07	5.34447	5.50091		1.00982	0.000475637	0.0017263
chr6_15_tRNATyr_GTA_I+	TRY-GTA8-1	chr6:26575798-26575887	chr6	26575798	26575887	II	0.722222	8.11486	1224.78	44.74	10.2586	1161.11	43.83	10.1816	1147.01	44.89	10.164	10.2014		0.65	564.049	63.46	9.14056	449.351	60.75	8.81283	346.425	63.5	8.43785	8.79708		1.40434	0.000793772	0.00241509
chr6_16_tRNATyr_GTA_I+	TRY-GTA3-1	chr6:26577332-26577420	chr6	26577332	26577420	II	1	11.3636	1541.78	50.65	10.5904	1585.23	47.24	10.6305	1431.57	51.9	10.4834	10.5681		0.65	710.922	64.56	9.47426	599.968	60.66	9.22957	449.517	64.06	8.81334	9.17239		1.39569	0.000701835	0.00223153
chr6_17_tRNATyr_GTA_I+	TRY-GTA6-1	chr6:26595102-26595190	chr6	26595102	26595190	II	2.22222	25.2525	3430.43	68.15	11.7437	4356.67	75.14	12.0886	2536.09	62.41	11.3077	11.7133		0.566667	795.782	73.63	9.63702	718.995	73.57	9.4907	482.859	72.89	8.91674	9.34815		2.36516	0.000469449	0.00171253
chr6_18_tRNAAla_AGC+	TRA-AGC14-1	chr6:26673590-26673662	chr6	26673590	26673662	II	0	0	6.2	16.12	2.848	7.73571	38.78	3.12598	5.39563	18.53	2.67582	2.88326		0	0.596825	0	0.669027	1.76667	56.6	1.46467	0.47619	0	0.555816	0.896504		1.98676	0.0010364	0.00283919
chr6_19_tRNAAla_AGC+	TRA-AGC12-1	chr6:26682715-26682787	chr6	26682715	26682787	II	0	0	9.67619	31	3.41549	7.0119	0	3.0018	10.8159	46.22	3.56194	3.32641		0.0416667	1.09683	0	1.03562	1.38571	0	1.22651	0.744048	0	0.765535	1.00922		2.31719	9.19716e-05	0.000685838
chr6_20_tRNAAla_AGC+	TRA-AGC10-1	chr6:26687485-26687557	chr6	26687485	26687557	II	0	0	7.64167	65.43	3.11103	10.9	73.39	3.57289	12.4917	88.05	3.75382	3.47925		0.0416667	1.7	58.82	1.41143	0.333333	0	0.367371	2.45833	81.35	1.76977	1.18286		2.29639	0.00288598	0.0055321
chr6_21_tRNAMet_CAT+	TRM-CAT5-1	chr6:26701712-26701784	chr6	26701712	26701784	II	30.4696	423.189	3576.33	30.11	11.7923	3150.04	33.52	11.6076	2055.23	35.71	10.9842	11.4614		11.1077	1048.52	43.39	10.0202	1127.14	44.89	10.1255	890.782	44.45	9.78247	9.97603		1.48536	0.0018162	0.00395909
chr6_22_tRNAAla_AGC+	TRA-AGC13-1	chr6:26705606-26705678	chr6	26705606	26705678	II	0	0	31.579	0	5.02547	30.0619	0	4.95699	29.0571	0	4.90929	4.96392		0.0416667	10.0468	9.95	3.45943	6.44127	0	2.88753	7.74405	12.91	3.12102	3.15599		1.80793	0.000107629	0.000754458
chr6_165_tRNAIle_AAT-	TRI-AAT7-1	chr6:26721221-26721294	chr6	26721221	26721294	II	0.439057	6.01448	191.144	0	7.58276	173.04	0	7.43968	154.502	0	7.27674	7.43306		0.43771	66.9064	0	6.0761	55.4444	0	5.80753	40.9222	0	5.37458	5.75274		1.68032	0.000493843	0.0017567
chr6_23_tRNAAla_AGC+	TRA-AGC18-1	chr6:26728256-26728328	chr6	26728256	26728328	II	0.333333	4.62963	149.922	0	7.23445	120.411	0	6.91978	96.0278	0	6.59525	6.91649		0	38.7556	0	5.31288	29.3222	0	4.9222	29.25	0	4.91886	5.05131		1.86518	0.00032507	0.00134179
chr6_24_tRNAAla_AGC+	TRA-AGC9-1	chr6:26730737-26730809	chr6	26730737	26730809	II	0.166667	2.31481	62.4667	0	5.98398	59.1	0	5.90529	43.15	0	5.45889	5.78272		0	16.7333	0	4.14812	10.1667	0	3.48027	8.63333	0	3.26754	3.63197		2.15074	0.000691888	0.00223153
chr6_164_tRNAMet_CAT-	TRM-CAT4-1	chr6:26735574-26735646	chr6	26735574	26735646	II	25.1978	349.969	4951.36	0	12.2665	4548.58	0	12.1435	2857.43	0	11.4682	11.9594		7.87553	897.898	0	9.79931	972.493	0	9.91531	756.229	0	9.5495	9.75471		2.20472	0.000328778	0.00134179
chr6_163_tRNAIle_AAT-	TRI-AAT6-1	chr6:26745255-26745328	chr6	26745255	26745328	II	0.935289	12.8122	384.32	71.29	8.58639	357.693	72.68	8.48285	347.35	67.65	8.4405	8.50324		0.287034	151.065	71.49	7.24581	144.85	78.7	7.18554	98.2453	74.3	6.62872	7.02002		1.48322	0.000568689	0.00196431
chr6_25_tRNAAla_AGC+	TRA-AGC21-1	chr6:26751918-26751990	chr6	26751918	26751990	II	0.333333	4.62963	46.3333	71.22	5.55449	40.25	89.44	5.35462	65.9167	86.47	6.05694	5.65535		0	19.5	92.3	4.35755	13	92.3	3.80735	12	100	3.70044	3.95512		1.70023	0.00150594	0.00346609
chr6_26_tRNAUndet_???+	TRU-NNN1-1	chr6:26752630-26752703	chr6	26752630	26752703	II	0	0	8	100	3.16993	10	100	3.45943	15	100	4	3.54312		0	8	100	3.16993	5	100	2.58496	8	100	3.16993	2.97494		0.568181	0.104131	0.123064
chr6_162_tRNAMet_CAT-	TRM-CAT4-2	chr6:26758550-26758622	chr6	26758550	26758622	II	25.2533	350.74	4871.48	0.28	12.2429	4508.36	0.51	12.1306	2825.47	0.67	11.4518	11.9418		7.9172	901.668	1.55	9.80534	969.369	1.34	9.91057	757.821	0.65	9.5525	9.75613		2.18566	0.000333379	0.00134179
chr6_27_tRNAMet_CAT+	TRM-CAT4-3	chr6:26766444-26766516	chr6	26766444	26766516	II	25.1978	349.969	4951.36	0	12.2665	4548.58	0	12.1435	2857.93	0	11.4685	11.9595		7.87553	897.898	0	9.79931	972.493	0	9.91531	756.229	0	9.5495	9.75471		2.20481	0.000328301	0.00134179
chr6_161_tRNAAla_AGC-	TRA-AGC9-2	chr6:26771290-26771362	chr6	26771290	26771362	II	0.166667	2.31481	41.4667	0	5.40236	34.6	0	5.14704	28.65	3.49	4.88183	5.14374		0	8.73333	0	3.28244	10.1667	0	3.48027	8.63333	0	3.26754	3.34341		1.80033	9.86198e-05	0.000714828
chr6_160_tRNAAla_AGC-	TRA-AGC18-2	chr6:26773771-26773843	chr6	26773771	26773843	II	0.333333	4.62963	149.422	0	7.22965	120.411	0	6.91978	95.7778	0	6.59151	6.91365		0	38.7556	0	5.31288	29.3222	0	4.9222	29.25	0	4.91886	5.05131		1.86233	0.00032591	0.00134179
chr6_28_tRNAIle_AAT+	TRI-AAT7-2	chr6:26780832-26780905	chr6	26780832	26780905	II	0.439057	6.01448	191.144	0	7.58276	173.04	0	7.43968	154.502	0	7.27674	7.43306		0.43771	66.9064	0	6.0761	55.4444	0	5.80753	40.9222	0	5.37458	5.75274		1.68032	0.000493843	0.0017567
chr6_159_tRNAAla_AGC-	TRA-AGC12-2	chr6:26796006-26796078	chr6	26796006	26796078	II	0	0	7.17619	0	3.03034	7.1119	0	3.0197	6.11587	0	2.82985	2.95996		0.0416667	1.09683	0	1.03562	1.38571	0	1.22651	0.744048	0	0.765535	1.00922		1.95074	4.31625e-05	0.000460615
chr6_29_tRNAIle_TAT_I+	TRI-TAT2-2	chr6:26988125-26988218	chr6	26988125	26988218	II	2.17778	23.417	1317.87	52.66	10.3627	1288.25	58.06	10.3299	1347.76	48.74	10.3951	10.3625		1.1	620.973	58.61	9.27815	584.312	61.61	9.19034	503.706	63.52	8.97613	9.14821		1.21434	6.65316e-05	0.000562652
chr6_30_tRNAPro_CGG+	TRP-CGG2-1	chr6:27059521-27059592	chr6	27059521	27059592	II	0.804581	11.3321	945.692	96.33	9.88552	959.407	95.78	9.90628	698.934	94.42	9.44941	9.74707		0.015873	270.786	94.17	8.08622	248.635	94.51	7.96357	208.373	93.1	7.70982	7.91987		1.8272	0.000151582	0.000902419
chr6_31_tRNASer_GCT+	TRS-GCT1-1	chr6:27065085-27065166	chr6	27065085	27065166	II	5.48651	67.7347	1440.65	67.33	10.488	1194.9	64.18	10.2172	1325.01	70.18	10.3669	10.3574		2.78739	576.412	67.65	9.16647	560.563	72.24	9.12612	425.923	76.07	8.72837	9.00699		1.35039	0.00033885	0.00134179
chr6_32_tRNAVal_CAC+	TRV-CAC9-1	chr6:27118022-27118094	chr6	27118022	27118094	II	0	0	4	100	2.32193	4	100	2.32193	7	100	3	2.54795		0	0	NA	0	0	NA	0	1	100	1	0.333333		2.21462	0.00187152	0.00401843
chr6_33_tRNAHis_GTG+	TRH-GTG1-5	chr6:27125906-27125977	chr6	27125906	27125977	II	8.59536	121.061	2687.19	74.05	11.3878	2499.23	75.46	11.2829	2067.4	76.81	11.0083	11.2263		2.40741	1071.7	75.39	10.0638	1146.2	79.04	10.1609	754.756	73.79	9.55717	9.92727		1.29905	0.00148029	0.0034599
chr6_34_tRNAThr_AGT+	TRT-AGT6-1	chr6:27130050-27130123	chr6	27130050	27130123	II	0.25	3.42466	232.884	30.05	7.86808	204.029	26.95	7.67786	215.013	29.76	7.75328	7.76641		0.19697	69.9964	47.14	6.14554	65.1006	33.79	6.04228	42.9478	30.26	5.45099	5.8796		1.8868	0.000291273	0.00129114
chr6_158_tRNAIle_AAT-	TRI-AAT5-2	chr6:27144994-27145067	chr6	27144994	27145067	II	4.23943	58.0743	1035.53	74.84	10.0116	868.096	73.26	9.75632	984.042	75.7	9.93782	9.90193		0.646966	586.225	80.68	9.19618	606.914	84.36	9.24619	468.611	85.35	8.87334	9.10523		0.796693	0.00216039	0.00447733
chr6_157_tRNAVal_CAC-	TRV-CAC6-1	chr6:27173867-27173939	chr6	27173867	27173939	II	4.96931	69.0182	1291.58	31.51	10.3305	1263.24	35.78	10.2984	926.918	33.98	9.8501	10.1597		0.755556	372.666	42.93	8.54267	339.806	42.67	8.40959	289.635	44.88	8.1793	8.37719		1.78247	0.000179547	0.000990284
chr6_35_tRNASer_CGA+	TRS-CGA2-1	chr6:27177628-27177709	chr6	27177628	27177709	II	3.66667	45.2675	1437.46	39.72	10.4866	1299.69	40.31	10.341	1473.03	47.04	10.522	10.4499		1.16667	459.279	54.21	8.84268	651.405	66.16	9.34703	438.736	62.68	8.77664	8.98878		1.46108	0.000462427	0.00169557
chr6_156_tRNAArg_ACG-	TRR-ACG2-2	chr6:27181623-27181695	chr6	27181623	27181695	II	1.76099	24.4582	1690.59	62.4	10.7227	1650.85	61.42	10.6883	1137.71	61.87	10.1509	10.5206		0.925806	252.306	34.48	7.97943	280.29	43.88	8.13112	192.983	39.89	7.59288	7.90114		2.6195	9.25814e-05	0.000685838
chr6_36_tRNAArg_ACG+	TRR-ACG2-3	chr6:27182952-27183024	chr6	27182952	27183024	II	6.42766	89.273	1276.58	48.72	10.3119	1271.51	48.68	10.3062	808.659	44.51	9.64966	10.0892		0.592472	363.71	53.33	8.50823	341.704	52.38	8.41832	277.541	55.84	8.11868	8.34841		1.74084	0.000686072	0.00222973
chr6_155_tRNALeu_TAA-	TRL-TAA4-1	chr6:27198334-27198416	chr6	27198334	27198416	II	6	73.1707	2446.45	97.65	11.2535	2091.45	98.35	11.0268	2355.9	96.82	11.199	11.1598		0.666667	1138.25	98.83	10.153	1476	99.18	10.5278	1102.83	98.38	10.1074	10.2628		0.897032	0.00167796	0.0037029
chr6_37_tRNAVal_AAC+	TRV-AAC5-1	chr6:27203288-27203360	chr6	27203288	27203360	II	2.26807	31.501	1093.9	88.49	10.0936	1147.32	87.5	10.1624	891.235	93.01	9.7976	10.0179		0.0654762	508.366	94.42	8.99236	460.427	92.95	8.84974	340.85	91.82	8.41695	8.75302		1.26486	0.00130166	0.0033003
chr6_154_tRNAIle_AAT-	TRI-AAT5-3	chr6:27205350-27205423	chr6	27205350	27205423	II	4.12831	56.5523	918.175	71.55	9.8377	829.981	71.68	9.69149	802.41	69.54	9.64257	9.72392		0.9803	347.046	65.69	8.43906	373.032	73.18	8.54324	266.908	71.93	8.06028	8.34752		1.3764	0.000292539	0.00129114
chr6_38_tRNAIle_AAT+	TRI-AAT9-1	chr6:27241739-27241812	chr6	27241739	27241812	II	0.0333333	0.456621	48.8257	38.91	5.63769	92.5817	74.52	6.54761	49.7901	44.18	5.66553	5.95028		0.0636364	27.1167	73.75	4.80976	27.7465	72.08	4.84181	19.3073	77.69	4.3389	4.66349		1.28679	0.00925081	0.0141634
chr6_153_tRNAIle_AAT-	TRI-AAT3-1	chr6:27242990-27243063	chr6	27242990	27243063	II	3.74472	51.2975	569.422	65.85	9.1464	461.866	60.62	8.84274	613.202	68.49	9.25376	9.08097		0.35067	283.616	69.1	8.15108	244.38	69.97	7.93683	184.618	70.95	7.53343	7.87378		1.20718	0.00205974	0.00433151
chr6_152_tRNAVal_CAC-	TRV-CAC2-1	chr6:27248049-27248121	chr6	27248049	27248121	II	2.86373	39.7741	3232.75	65.17	11.6577	3446.22	71.15	11.75	2636.67	68.34	11.3635	11.5904		1.8627	1454.08	78.67	10.505	1621.6	82.2	10.6624	1304.53	81.56	10.3484	10.5053		1.08513	0.000671891	0.00220368
chr6_39_Pseudo_AAT+	TRI-AAT10-1	chr6:27251864-27251937	chr6	27251864	27251937	II	0	0	7.34848	27.21	3.06005	12.3136	73.08	3.73444	7.33232	13.63	3.05832	3.28427		0	10.2338	87.94	3.48929	8.06717	74.37	3.17951	5.84848	85.49	2.774	3.1476		0.13667	0.646904	0.686256
chr6_40_tRNAVal_TAC+	TRV-TAC4-1	chr6:27258405-27258477	chr6	27258405	27258477	II	3	41.6667	935.5	99.73	9.86651	978.333	99.96	9.93123	739	99.72	9.52552	9.77442		0.666667	194	99.48	7.60239	203.5	99.75	7.67125	174.5	99.71	7.44984	7.57449		2.19993	1.97967e-05	0.000368153
chr6_41_Pseudo_ACT+	TRS-ACT1-1	chr6:27261671-27261744	chr6	27261671	27261744	II	13.1742	180.468	1259.29	96.8	10.2844	1155.6	97.61	10.1591	1292.79	96.68	10.3226	10.2554		2.09776	884.947	98.98	9.78765	796.749	99.4	9.63598	595.178	98.96	9.21451	9.54605		0.709333	0.00879629	0.0135546
chr6_42_tRNAGln_CTG+	TRQ-CTG5-1	chr6:27263212-27263283	chr6	27263212	27263283	II	1.04762	14.7552	1006.02	46.02	9.97438	1367.54	72.97	10.4173	903.49	42.83	9.81929	10.0703		0.888228	461.173	59.41	8.84952	552.188	59.21	9.1093	344.625	55.13	8.42935	8.79606		1.27427	0.00367969	0.00656104
chr6_43_tRNASer_GCT+	TRS-GCT2-1	chr6:27265775-27265856	chr6	27265775	27265856	II	2.3754	29.3259	805.406	40.6	9.6511	717.814	39.98	9.4847	693.425	41.38	9.43473	9.52351		0.120718	365.194	47.91	8.51598	359.249	55.39	8.49233	256.97	59.15	8.01033	8.33955		1.18396	0.000942725	0.0026748
chr6_151_tRNAThr_CGT-	TRT-CGT6-1	chr6:27271568-27271639	chr6	27271568	27271639	II	4.7	66.1972	1075.41	99.49	10.0657	769.503	99.28	9.58082	968.022	99.48	9.91337	9.8533		0.037037	515.711	99.66	9.01311	482.522	99.68	8.91732	362.743	99.79	8.50662	8.81235		1.04095	0.00339703	0.00625998
chr6_150_tRNAMet_CAT-	TRX-CAT1-5	chr6:27300764-27300835	chr6	27300764	27300835	II	6.80384	95.8287	2165.4	7.71	11.0765	1566.55	6	10.608	2025.27	16.83	10.9798	10.8881		3.04352	956.936	29.57	9.89919	972.872	30.21	9.92307	762.285	25.44	9.57031	9.79753		1.09058	0.00154149	0.00348911
chr6_149_tRNALys_TTT-	TRK-TTT6-1	chr6:27302769-27302841	chr6	27302769	27302841	II	2.93417	40.7524	1774.84	35.43	10.7919	1548.37	24.99	10.5947	1391.54	50.51	10.4405	10.609		2.50745	488.301	74.54	8.92718	604.338	76.77	9.2356	437.875	76.27	8.7694	8.97739		1.63163	0.000180394	0.000990284
chr6_44_tRNASer_AGA+	TRS-AGA2-2	chr6:27446591-27446672	chr6	27446591	27446672	II	1.70295	21.024	1083.89	76.2	10.0811	915.307	74.07	9.837	918.384	75.56	9.84185	9.91997		0.879027	589.104	81.64	9.20267	624.013	83.65	9.28571	445.557	82.36	8.79984	9.09607		0.823893	0.00398673	0.00693556
chr6_45_tRNAAsp_GTC+	TRD-GTC2-6	chr6:27447453-27447524	chr6	27447453	27447524	II	138.816	1955.15	7149.22	28.17	12.7755	7709.98	25.26	12.8865	4052.7	23.86	11.9348	12.5322		60.2441	3173.5	23.85	11.6047	2476.42	31.05	11.2391	1499.99	29.33	10.4926	11.1121		1.42012	0.0172985	0.0246384
chr6_46_tRNASer_AGA+	TRS-AGA2-3	chr6:27463593-27463674	chr6	27463593	27463674	II	3.13998	38.7652	522.793	52.98	9.02418	430.755	47.12	8.74353	495.243	57.14	8.94575	8.90449		0.21236	274.872	62.93	8.10675	318.096	70.41	8.31687	191.193	61.71	7.58481	8.00281		0.901677	0.00903497	0.0138627
chr6_47_tRNASer_AGA+	TRS-AGA2-4	chr6:27470818-27470899	chr6	27470818	27470899	II	1.54739	19.1036	723.112	64.16	9.49699	611.966	60.62	9.25601	659.783	65.17	9.36465	9.37255		0.170694	286.074	64.31	8.16442	293.18	68.89	8.19969	255.617	69.63	8.0025	8.1222		1.25035	5.94846e-05	0.000538373
chr6_48_tRNAAsp_GTC+	TRD-GTC2-7	chr6:27471523-27471594	chr6	27471523	27471594	II	141.087	1987.14	6456.55	13.66	12.6249	7065.03	9.78	12.7576	3877.01	14.36	11.8676	12.4167		63.4125	3073.62	15.58	11.5561	2299.5	18.96	11.1274	1413.73	18.74	10.4002	11.0279		1.38881	0.0176448	0.0250815
chr6_148_tRNASer_TGA-	TRS-TGA4-1	chr6:27473607-27473688	chr6	27473607	27473688	II	3.14141	38.7829	577.896	23.53	9.1693	554.21	30.13	9.10868	575.599	14.94	9.16352	9.14717		1.09064	173.61	23.61	7.43901	187.727	23.97	7.5518	169.054	15.37	7.40059	7.4638		1.68337	2.49061e-06	0.000284258
chr6_49_tRNAGln_CTG+	TRQ-CTG1-2	chr6:27487308-27487379	chr6	27487308	27487379	II	13.1479	185.182	7486.65	0.46	12.8678	7394.59	0.33	12.8499	2226.95	1.48	11.113	12.2769		4.44128	855.042	2.22	9.73404	1130.18	1.68	10.1379	921.607	3.25	9.84261	9.90486		2.37201	0.00716673	0.0113117
[truncated: 400 more rows]
