# Supplementary material for: Human MAF1 targets and represses active RNA polymerase III genes by preventing recruitment rather than inducing long-term transcriptional arrest
Source: HighWire-hosted journal article supplement (doi:10.1101/gr.201400.115), 2016-03-03
Supplement: Supp_Table_S3.xlsx [file Supp_Table_S3.xlsx]

## Sheet: Legend
Pol III genes and relative DamIP-seq scores for MAF1 association
In blue are highlighted the genes with MAF1 DamIP-seq scores above cut-off (0.793548512162076, pval 0.005) in serum starved cells (SS)
In orange are highlighted the genes with MAF1 DamIP-seq scores above cut-off (0.410284456549292, pval 0.005) only in serum grown cells (FBS)
Genes with MAF1 DamIP-seq scores above the cut-off in both serum starved and serum grown cells are underlined
See Methods for cut-off calculations
For DamIP-seq analysis at other loci (Pol II genes and repeats), we considered only 400 bp bins with at least 8 tags and significantly (p<0.005) enriched in MAF1 versus EGFP
Only bins with scores above cut-off are listed

## Sheet: DamIP-seq (Pol III loci)
Gene name	HUGO nomenclature	chromosome	start	end	MAF1 FBS tag count	EGFP FBS tag count	MAF1 SS tag count	EGFP SS tag count	MAF1 DamIP-seq score (FBS)	MAF1 DamIP-seq score (SS)	ATC within gene body (both strands)	GATC within gene body (both strands)
chr6_96_tRNAPhe_GAA-|-|chr6:28949449-28949521	TRF-GAA1-2	chr6	28949449	28949521	203	3	833	8	2.81979	4.50529	YES	YES
chr13_1_tRNAPhe_GAA-|-|chr13:95201904-95201976	TRF-GAA1-5	chr13	95201904	95201976	278	18	727	4	2.68182	4.47669	YES	YES
chr19_14_tRNAPhe_GAA-|-|chr19:1383361-1383433	TRF-GAA1-6	chr19	1383361	1383433	160	7	548	4	2.3604	4.08746	YES	YES
chr6_106_tRNAPhe_GAA-|-|chr6:28775610-28775682	TRF-GAA3-1	chr6	28775610	28775682	205	21	586	18	2.20409	3.68182	YES	YES
chr12_11_tRNAPhe_GAA-|-|chr12:125412389-125412461	TRF-GAA1-4	chr12	125412389	125412461	117	7	353	16	1.99022	3.05764	YES	YES
7SK_RNA|+|chr6:52860417-52860749	RN7SK	chr6	52860417	52860749	135	26	298	10	1.55897	3.03562	YES	YES
chr6_4_tRNAArg_TCG+|+|chr6:26323046-26323118	TRR-TCG2-1	chr6	26323046	26323118	81	9	216	18	1.50901	2.35755	YES	YES
chr6_59_tRNAIle_AAT+|+|chr6:27655967-27656040	TRI-AAT2-1	chr6	27655967	27656040	61	4	202	2	1.42033	2.85798	YES	YES
chr19_1_tRNAAsn_GTT+|+|chr19:1383562-1383635	TRN-GTT2-6	chr19	1383562	1383635	61	5	216	6	1.37851	2.77259	YES	NO
chr6_124_tRNAArg_TCG-|-|chr6:28510891-28510963	TRR-TCG5-1	chr6	28510891	28510963	63	7	225	6	1.32971	2.82443	YES	YES
chr6_158_tRNAIle_AAT-|-|chr6:27144994-27145067	TRI-AAT5-2	chr6	27144994	27145067	72	11	171	10	1.31487	2.32912	YES	YES
chr12_13_tRNAAla_TGC-|-|chr12:125406301-125406372	TRA-TGC3-2	chr12	125406301	125406372	58	7	160	18	1.24998	1.98489	YES	YES
chr12_6_tRNATrp_CCA+|+|chr12:98898030-98898101	TRW-CCA4-1	chr12	98898030	98898101	43	4	75	14	1.10236	1.25481	YES	YES
RN7SL1|+|chr14:50053297-50053596	RN7SL1	chr14	50053297	50053596	61	13	138	3	1.08153	2.34792	YES	YES
chr6_119_tRNAAla_CGC-|-|chr6:28641613-28641684	TRA-CGC2-1	chr6	28641613	28641684	29	1	77	8	0.928447	1.49354	YES	YES
chr14_7_tRNAArg_ACG+|+|chr14:23398910-23398982	TRR-ACG1-3	chr14	23398910	23398982	29	3	72	6	0.838249	1.5025	YES	YES
chr6_120_tRNAAla_AGC-|-|chr6:28626014-28626085	TRA-AGC4-1	chr6	28626014	28626085	34	6	63	4	0.830075	1.4517	YES	YES
chr19_8_tRNASeC(e)_TCA-|-|chr19:45981860-45981945	TRZ-TCA1-1	chr19	45981860	45981945	34	6	61	14	0.830075	1.04836	YES	YES
chr2_3_tRNAAla_AGC+|+|chr2:27274082-27274154	TRA-AGC8-1	chr2	27274082	27274154	63	24	221	28	0.784271	2.11356	YES	YES
chr6_10_tRNAAla_CGC+|+|chr6:26553731-26553802	TRA-CGC1-1	chr6	26553731	26553802	37	9	110	14	0.780687	1.66985	YES	YES
chr3_11_tRNAArg_ACG-|-|chr3:45730491-45730563	TRR-ACG2-1	chr3	45730491	45730563	42	12	94	18	0.777608	1.36923	YES	YES
chr6_130_tRNAGln_TTG-|-|chr6:27763640-27763711	TRQ-TTG3-3	chr6	27763640	27763711	33	7	61	18	0.767827	0.922832	YES	YES
chr6_150_tRNAMet_CAT-|-|chr6:27300764-27300835	TRX-CAT1-5	chr6	27300764	27300835	24	3	37	8	0.710493	0.818162	YES	YES
chr1_32_tRNAMet_CAT+|+|chr1:153643726-153643797	TRX-CAT1-1	chr1	153643726	153643797	68	32	171	30	0.660514	1.74416	YES	YES
chr6_66_tRNAAla_TGC+|+|chr6:28611222-28611293	TRA-TGC2-1	chr6	28611222	28611293	22	3	51	6	0.656046	1.16993	YES	YES
chr6_168_tRNATrp_CCA-|-|chr6:26331672-26331743	TRW-CCA3-2	chr6	26331672	26331743	23	4	61	18	0.640458	0.922832	YES	YES
chr6_169_tRNAMet_CAT-|-|chr6:26330529-26330600	TRX-CAT1-4	chr6	26330529	26330600	23	6	82	12	0.557995	1.41504	YES	YES
hY3_RNA|+|chr7:148680846-148680947	RNY3	chr7	148680846	148680947	33	13	61	8	0.551015	1.25987	YES	YES
chr19_4_tRNAThr_AGT+|+|chr19:33667963-33668036	TRT-AGT1-3	chr19	33667963	33668036	34	14	54	12	0.540568	1	YES	YES
chr17_39_tRNATrp_CCA-|-|chr17:8124187-8124258	TRW-CCA1-1	chr17	8124187	8124258	15	1	35	0	0.537657	1.11548	YES	YES
chr6_173_tRNAGln_TTG-|-|chr6:26311975-26312046	TRQ-TTG3-2	chr6	26311975	26312046	22	6	65	6	0.530515	1.39993	YES	YES
RN7SL2|-|chr14:50329268-50329567	RN7SL2	chr14	50329268	50329567	33	14	65	5	0.517848	1.44057	YES	YES
chr2_2_tRNATyr_GTA_I+|+|chr2:27273650-27273738	TRY-GTA2-1	chr2	27273650	27273738	49	26	185	30	0.496426	1.8413	YES	NO
chr17_12_tRNATrp_CCA+|+|chr17:19411494-19411565	TRW-CCA2-1	chr17	19411494	19411565	22	7	30	4	0.490986	0.819428	YES	YES
chr6_140_tRNALeu_CAA_I-|-|chr6:27573417-27573524	TRL-CAA2-1	chr6	27573417	27573524	19	5	37	6	0.485427	0.896164	YES	NO
chr11_15_tRNAPhe_GAA-|-|chr11:59324970-59325042	TRF-GAA1-3	chr11	59324970	59325042	44	23	65	8	0.481533	1.32193	YES	YES
chr14_10_tRNAIle_AAT+|+|chr14:102783429-102783502	TRI-AAT5-4	chr14	102783429	102783502	31	15	54	18	0.438884	0.807355	YES	YES
chr1_56_tRNAThr_TGT+|+|chr1:222638347-222638419	TRT-TGT2-1	chr1	222638347	222638419	13	2	28	2	0.426265	0.857981	YES	YES
chr6_8_tRNAArg_ACG+|+|chr6:26537726-26537798	TRR-ACG1-2	chr6	26537726	26537798	14	3	30	4	0.415037	0.819428	YES	YES
chr6_109_tRNAPhe_GAA-|-|chr6:28758499-28758571	TRF-GAA1-1	chr6	28758499	28758571	24	12	101	10	0.36257	1.71149	YES	YES
chr6_41_Pseudo_ACT+|+|chr6:27261671-27261744	TRS-ACT1-1	chr6	27261671	27261744	14	5	51	10	0.330149	1.01792	YES	YES
chr11_13_tRNAPhe_GAA-|-|chr11:59333853-59333925	TRF-GAA2-1	chr11	59333853	59333925	14	5	42	8	0.330149	0.921997	YES	YES
chr12_12_tRNAAsp_GTC-|-|chr12:125411891-125411962	TRD-GTC2-9	chr12	125411891	125411962	25	14	65	16	0.321928	1.04629	YES	NO
chr6_6_tRNAArg_ACG+|+|chr6:26328368-26328440	TRR-ACG1-1	chr6	26328368	26328440	11	3	30	4	0.313158	0.819428	YES	YES
chr6_34_tRNAThr_AGT+|+|chr6:27130050-27130123	TRT-AGT6-1	chr6	27130050	27130123	8	1	42	2	0.293731	1.16993	YES	YES
chr6_83_tRNALeu_TAA+|+|chr6:144537684-144537766	TRL-TAA1-1	chr6	144537684	144537766	14	6	54	8	0.289507	1.14439	YES	YES
chr16_15_tRNAThr_CGT+|+|chr16:14379750-14379821	TRT-CGT2-1	chr16	14379750	14379821	34	23	82	22	0.27208	1.10692	YES	YES
chr6_156_tRNAArg_ACG-|-|chr6:27181623-27181695	TRR-ACG2-2	chr6	27181623	27181695	30	20	32	0	0.263034	1.04731	YES	YES
chr17_36_tRNAThr_AGT-|-|chr17:8129553-8129626	TRT-AGT1-2	chr17	8129553	8129626	14	7	49	10	0.249978	0.981853	YES	YES
chr6_2_tRNAMet_CAT+|+|chr6:26286754-26286825	TRX-CAT1-2	chr6	26286754	26286825	14	7	40	6	0.249978	0.959358	YES	YES
chr6_166_tRNAAla_AGC-|-|chr6:26572092-26572164	TRA-AGC11-1	chr6	26572092	26572164	12	8	32	4	0.14439	0.866733	YES	YES
chr17_20_tRNAMet_CAT-|-|chr17:80452597-80452668	TRX-CAT1-8	chr17	80452597	80452668	17	16	37	8	0.0310269	0.818162	YES	YES
chr2_17_Pseudo_TTC-|-|chr2:204229131-204229201	TRE-TTC9-1	chr2	204229131	204229201	22	33	54	16	-0.27684	0.868755	NO	NO
chr11_4_tRNALeu_TAA+|+|chr11:59319228-59319310	TRL-TAA3-1	chr11	59319228	59319310	22	3	56	24	0.656046	0.671377	YES	YES
chr6_49_tRNAGln_CTG+|+|chr6:27487308-27487379	TRQ-CTG1-2	chr6	27487308	27487379	21	4	25	8	0.584963	0.533432	YES	YES
chr19_13_tRNAVal_CAC-|-|chr19:4724647-4724719	TRV-CAC3-1	chr19	4724647	4724719	19	5	21	4	0.485427	0.584963	YES	YES
chr15_4_tRNAArg_TCG+|+|chr15:89878304-89878376	TRR-TCG1-1	chr15	89878304	89878376	24	9	21	6	0.469485	0.5025	YES	YES
chr19_10_tRNAIle_TAT_I-|-|chr19:39902808-39902900	TRI-TAT1-1	chr19	39902808	39902900	17	4	32	8	0.467126	0.706269	YES	YES
chr17_30_tRNACys_GCA-|-|chr17:36989975-36990046	TRC-GCA24-1	chr17	36989975	36990046	28	12	0	2	0.465664	-0.0931094	YES	YES
chr6_155_tRNALeu_TAA-|-|chr6:27198334-27198416	TRL-TAA4-1	chr6	27198334	27198416	11	0	21	10	0.450661	0.350497	YES	YES
chr6_171_tRNAMet_CAT-|-|chr6:26313352-26313423	TRX-CAT1-3	chr6	26313352	26313423	12	1	21	2	0.438121	0.672425	YES	YES
chr2_12_Pseudo_CTC+|+|chr2:151219277-151219349	TRE-CTC9-1	chr2	151219277	151219349	29	14	4	10	0.423211	-0.234465	YES	NO
chr17_19_tRNAArg_TCG+|+|chr17:73031208-73031280	TRR-TCG3-1	chr17	73031208	73031280	18	6	35	10	0.415037	0.70044	YES	YES
chr6_131_tRNAGln_CTG-|-|chr6:27759135-27759206	TRQ-CTG6-1	chr6	27759135	27759206	22	9	28	12	0.415037	0.465664	YES	YES
chr15_8_tRNAHis_GTG-|-|chr15:45492611-45492682	TRH-GTG1-8	chr15	45492611	45492682	14	3	21	12	0.415037	0.280108	YES	YES
chr6_110_tRNAAla_TGC-|-|chr6:28757547-28757618	TRA-TGC1-1	chr6	28757547	28757618	28	14	37	10	0.398549	0.744161	YES	YES
chr17_28_tRNACys_GCA-|-|chr17:37025545-37025616	TRC-GCA4-1	chr17	37025545	37025616	22	10	40	12	0.378512	0.736966	YES	YES
chr16_4_tRNAPro_AGG_I+|+|chr16:3210386-3210480	TRP-AGG3-1	chr16	3210386	3210480	36	21	4	8	0.371969	-0.160465	YES	NO
chr8_12_tRNATyr_GTA_I-|-|chr8:66609532-66609619	TRY-GTA9-1	chr8	66609532	66609619	26	14	4	2	0.347923	0.0874628	YES	NO
AluSp_SINE_Alu_87551831|+|chr12:87551831-87552137	N/A	chr12	87551831	87552137	31	18	21	14	0.345775	0.212994	YES	YES
chr1_5_tRNAGlu_TTC+|+|chr1:17199078-17199149	TRE-TTC3-1	chr1	17199078	17199149	18	8	7	6	0.337035	0.0395284	YES	NO
chr6_73_tRNAArg_CCG+|+|chr6:28849165-28849237	TRR-CCG1-2	chr6	28849165	28849237	14	5	37	10	0.330149	0.744161	YES	YES
chr8_8_tRNAUndet_???+|+|chr8:99153462-99153530	TRU-NNN2-1	chr8	99153462	99153530	14	5	4	6	0.330149	-0.0824622	YES	YES
chr17_26_tRNACys_GCA-|-|chr17:37310744-37310815	TRC-GCA2-4	chr17	37310744	37310815	19	9	16	6	0.329308	0.353637	YES	YES
chr1_94_tRNAGlu_TTC-|-|chr1:149664355-149664427	TRE-TTC8-1	chr1	149664355	149664427	10	2	4	0	0.321928	0.180572	YES	NO
chr5_15_tRNAVal_AAC-|-|chr5:180615416-180615488	TRV-AAC2-1	chr5	180615416	180615488	16	7	4	10	0.314109	-0.234465	YES	NO
chr17_3_tRNAGln_CTG+|+|chr17:8023070-8023141	TRQ-CTG1-5	chr17	8023070	8023141	11	3	30	6	0.313158	0.736966	YES	YES
chr16_13_Pseudo_CTT+|+|chr16:3246153-3246225	TRK-CTT14-1	chr16	3246153	3246225	12	4	2	4	0.304855	-0.0874628	YES	NO
chr12_3_tRNAGln_CTG+|+|chr12:74851182-74851254	TRQ-CTG12-1	chr12	74851182	74851254	7	0	7	10	0.302563	-0.112475	YES	NO
chr5_21_Pseudo_CTG-|-|chr5:151248074-151248145	TRQ-CTG13-1	chr5	151248074	151248145	7	0	0	18	0.302563	-0.678072	YES	NO
chr5_6_tRNAVal_CAC+|+|chr5:180600650-180600722	TRV-CAC1-4	chr5	180600650	180600722	18	9	11	18	0.29956	-0.22741	YES	NO
chr1_1_Pseudo_CAC+|+|chr1:17052061-17052133	TRV-CAC13-1	chr1	17052061	17052133	14	6	9	10	0.289507	-0.0365259	YES	NO
PDS5B_Intronic_AluSx|+|chr13:33230740-33231112	N/A	chr13	33230740	33231112	42	29	28	8	0.287282	0.610053	YES	NO
chr8_4_tRNATyr_GTA_I+|+|chr8:67025602-67025694	TRY-GTA5-1	chr8	67025602	67025694	9	2	2	8	0.285402	-0.247928	YES	NO
chr6_167_tRNAThr_AGT-|-|chr6:26533145-26533218	TRT-AGT2-1	chr6	26533145	26533218	10	3	9	10	0.277534	-0.0365259	YES	YES
chr6_84_tRNAGln_TTG+|+|chr6:145503859-145503930	TRQ-TTG4-1	chr6	145503859	145503930	33	22	9	10	0.27684	-0.0365259	YES	NO
chr6_174_tRNAGln_TTG-|-|chr6:26311424-26311495	TRQ-TTG3-1	chr6	26311424	26311495	16	8	28	6	0.275634	0.688056	YES	YES
chr17_13_tRNAGly_CCC+|+|chr17:19764175-19764245	TRG-CCC3-1	chr17	19764175	19764245	39	27	4	12	0.275634	-0.304855	YES	NO
chr1_118_tRNAHis_GTG-|-|chr1:145396881-145396952	TRH-GTG1-1	chr1	145396881	145396952	22	13	21	6	0.274175	0.5025	YES	YES
chr6_104_tRNAAla_TGC-|-|chr6:28785012-28785083	TRA-TGC5-1	chr6	28785012	28785083	11	4	23	14	0.270089	0.268489	YES	YES
chr6_129_tRNAMet_CAT-|-|chr6:27870271-27870342	TRX-CAT1-7	chr6	27870271	27870342	11	4	16	12	0.270089	0.131245	YES	YES
AluY_SINE_Alu_19904648|+|chr17:19904648-19904827	N/A	chr17	19904648	19904827	64	48	11	20	0.269187	-0.286304	YES	YES
chr6_162_tRNAMet_CAT-|-|chr6:26758550-26758622	TRM-CAT4-2	chr6	26758550	26758622	6	0	2	8	0.263034	-0.247928	YES	NO
chr6_154_tRNAIle_AAT-|-|chr6:27205350-27205423	TRI-AAT5-3	chr6	27205350	27205423	7	1	18	10	0.255257	0.263034	YES	YES
chr15_7_tRNAGln_CTG-|-|chr15:66161400-66161471	TRQ-CTG1-4	chr15	66161400	66161471	14	7	18	6	0.249978	0.415037	YES	YES
chr7_18_tRNACys_GCA-|-|chr7:149310156-149310227	TRC-GCA19-1	chr7	149310156	149310227	14	7	14	14	0.249978	0	YES	NO
chr6_53_tRNALys_TTT+|+|chr6:27543846-27543918	TRK-TTT9-1	chr6	27543846	27543918	8	2	14	4	0.247928	0.371969	YES	NO
chrX_1_Pseudo_TTG+|+|chrX:55206666-55206737	NMTRQ-TTG1-1	chrX	55206666	55206737	8	2	23	12	0.247928	0.335603	YES	NO
chr6_33_tRNAHis_GTG+|+|chr6:27125906-27125977	TRH-GTG1-5	chr6	27125906	27125977	8	2	9	12	0.247928	-0.106915	YES	YES
chr2_25_Pseudo_CTC-|-|chr2:71273488-71273560	TRE-CTC15-1	chr2	71273488	71273560	9	3	16	4	0.241008	0.436099	YES	NO
chr8_6_tRNAAla_AGC+|+|chr8:67026424-67026496	TRA-AGC8-2	chr8	67026424	67026496	9	3	14	4	0.241008	0.371969	YES	YES
chr5_24_tRNALys_CTT-|-|chr5:26198539-26198611	TRK-CTT9-1	chr5	26198539	26198611	9	3	4	6	0.241008	-0.0824622	YES	NO
chr6_17_tRNATyr_GTA_I+|+|chr6:26595102-26595190	TRY-GTA6-1	chr6	26595102	26595190	9	3	7	12	0.241008	-0.182864	YES	NO
chr19_11_Pseudo_???-|-|chr19:36111460-36111530	TRU-NNN10-1	chr19	36111460	36111530	9	3	7	12	0.241008	-0.182864	YES	NO
OTHER5|+|chr1:147752681-147752773	N/A	chr1	147752681	147752773	16	9	7	2	0.23816	0.209453	NO	NO
chr3_6_tRNACys_GCA-|-|chr3:131950642-131950713	TRC-GCA9-1	chr3	131950642	131950713	10	4	14	8	0.234465	0.211504	YES	YES
chr1_83_tRNAAsn_GTT-|-|chr1:161397867-161397940	TRN-GTT2-2	chr1	161397867	161397940	10	4	9	10	0.234465	-0.0365259	YES	NO
chr11_3_tRNAArg_TCT_I+|+|chr11:59318767-59318852	TRR-TCT3-2	chr11	59318767	59318852	17	10	32	8	0.232661	0.706269	YES	NO
chr6_121_tRNAThr_CGT-|-|chr6:28615984-28616057	TRT-CGT3-1	chr6	28615984	28616057	12	6	21	10	0.222392	0.350497	YES	YES
chr14_8_tRNACys_GCA+|+|chr14:73429679-73429750	TRC-GCA8-1	chr14	73429679	73429750	19	12	23	16	0.222392	0.204358	YES	YES
chr8_5_tRNATyr_GTA_I+|+|chr8:67026223-67026311	TRY-GTA5-2	chr8	67026223	67026311	12	6	7	4	0.222392	0.121991	YES	NO
chr5_14_tRNAPro_TGG-|-|chr5:180615854-180615925	TRP-TGG3-1	chr5	180615854	180615925	12	6	2	6	0.222392	-0.169925	YES	NO
chr10_6_tRNAVal_TAC-|-|chr10:5895674-5895746	TRV-TAC3-1	chr10	5895674	5895746	26	18	7	12	0.222392	-0.182864	YES	NO
RN7SL3|-|chr14:50320327-50320727	RN7SL3	chr14	50320327	50320727	34	25	14	15	0.21864	-0.0324215	YES	YES
chr6_125_tRNAThr_CGT-|-|chr6:28456770-28456843	TRT-CGT1-1	chr6	28456770	28456843	6	1	16	2	0.215729	0.523562	YES	YES
chr1_51_Pseudo_CTT+|+|chr1:165566150-165566222	TRK-CTT13-1	chr1	165566150	165566222	35	26	9	6	0.215013	0.115477	YES	YES
chr6_58_tRNAVal_CAC+|+|chr6:27650488-27650561	TRV-CAC12-1	chr6	27650488	27650561	14	8	9	10	0.211504	-0.0365259	YES	NO
chr6_115_tRNAVal_AAC-|-|chr6:28703206-28703277	TRV-AAC6-1	chr6	28703206	28703277	8	3	16	10	0.203533	0.201634	YES	YES
chr6_11_tRNAIle_AAT+|+|chr6:26554350-26554423	TRI-AAT5-1	chr6	26554350	26554423	8	3	4	12	0.203533	-0.304855	YES	YES
chr16_19_tRNAGly_GCC+|+|chr16:70823410-70823480	TRG-GCC2-5	chr16	70823410	70823480	8	3	2	12	0.203533	-0.392317	YES	NO
chr6_95_tRNAAla_AGC-|-|chr6:58141877-58141949	TRA-AGC22-1	chr6	58141877	58141949	8	3	0	10	0.203533	-0.415037	YES	YES
tRNA-Tyr-TAC_tRNA_tRNA|-|chr14:21098590-21098668	N/A	chr14	21098590	21098668	8	3	4	18	0.203533	-0.4975	YES	NO
MIRb_SINE_MIR_9136662|-|chr16:9136662-9137062	N/A	chr16	9136662	9137062	31	23	18	14	0.202817	0.125531	YES	NO
chr16_27_tRNALeu_TAG-|-|chr16:22207032-22207113	TRL-TAG3-1	chr16	22207032	22207113	16	10	42	18	0.201634	0.584963	YES	NO
chr6_16_tRNATyr_GTA_I+|+|chr6:26577332-26577420	TRY-GTA3-1	chr6	26577332	26577420	24	17	54	20	0.200299	0.748461	YES	NO
chr10_3_Pseudo_CAA-|-|chr10:34591416-34591483	TRL-CAA7-1	chr10	34591416	34591483	9	4	11	6	0.197939	0.187627	YES	NO
chr17_6_tRNATrp_CCA+|+|chr17:8089676-8089747	TRW-CCA3-3	chr17	8089676	8089747	9	4	11	8	0.197939	0.109624	YES	YES
chr17_1_Pseudo_???+|+|chr17:7524457-7524525	TRU-NNN6-1	chr17	7524457	7524525	52	42	32	26	0.187627	0.146841	YES	YES
MIRb_SINE_MIR_75003721|+|chr9:75003721-75003918	N/A	chr9	75003721	75003918	11	6	18	22	0.187627	-0.115477	YES	NO
chr1_133_tRNAGlu_TTC-|-|chr1:16861774-16861845	TRE-TTC4-1	chr1	16861774	16861845	11	6	7	14	0.187627	-0.249978	YES	NO
AluSg/x_SINE_Alu_42443389|+|chr22:42443389-42443595	N/A	chr22	42443389	42443595	44	35	18	24	0.187086	-0.169925	YES	YES
chr5_9_tRNALys_CTT+|+|chr5:180634755-180634827	TRK-CTT2-2	chr5	180634755	180634827	12	7	35	8	0.182864	0.77444	YES	NO
chr16_1_tRNAArg_CCG+|+|chr16:3200675-3200747	TRR-CCG1-3	chr16	3200675	3200747	12	7	4	6	0.182864	-0.0824622	YES	YES
chr6_25_tRNAAla_AGC+|+|chr6:26751918-26751990	TRA-AGC21-1	chr6	26751918	26751990	4	0	7	0	0.180572	0.302563	YES	YES
chr14_13_tRNALys_CTT-|-|chr14:58706613-58706685	TRK-CTT1-1	chr14	58706613	58706685	4	0	4	8	0.180572	-0.160465	YES	NO
chr2_28_Pseudo_TTG-|-|chr2:45937441-45937513	TRQ-TTG5-1	chr2	45937441	45937513	13	8	14	2	0.178337	0.459432	YES	NO
chr6_13_tRNALys_CTT+|+|chr6:26556774-26556846	TRK-CTT2-4	chr6	26556774	26556846	14	9	40	12	0.174029	0.736966	YES	NO
chr1_43_tRNAGly_GCC+|+|chr1:161450356-161450426	TRG-GCC4-1	chr1	161450356	161450426	14	9	23	10	0.174029	0.405992	YES	NO
chr1_20_tRNAAsn_ATT+|+|chr1:147719029-147719102	TRN-ATT1-1	chr1	147719029	147719102	14	9	4	8	0.174029	-0.160465	YES	NO
chr17_32_Pseudo_TGA-|-|chr17:22028179-22028247	NMTRS-TGA3-1	chr17	22028179	22028247	6	2	7	14	0.169925	-0.249978	NO	NO
chr9_3_tRNATrp_CCA_I+|+|chr9:115616989-115617087	TRW-CCA6-1	chr9	115616989	115617087	7	3	11	12	0.165059	-0.0347654	YES	NO
chr3_10_Pseudo_CTC-|-|chr3:103879524-103879595	TRE-CTC12-1	chr3	103879524	103879595	7	3	9	10	0.165059	-0.0365259	YES	NO
chr8_9_Pseudo_GAA-|-|chr8:124270725-124270797	TRF-GAA12-1	chr8	124270725	124270797	7	3	0	6	0.165059	-0.263034	YES	NO
chr1_58_tRNALeu_CAA_I+|+|chr1:249168054-249168159	TRL-CAA4-1	chr1	249168054	249168159	7	3	2	10	0.165059	-0.321928	YES	NO
chr6_52_tRNAArg_TCT_I+|+|chr6:27529963-27530049	TRR-TCT5-1	chr6	27529963	27530049	7	3	4	20	0.165059	-0.556393	YES	NO
chr8_11_tRNASer_AGA-|-|chr8:96281885-96281966	TRS-AGA2-5	chr8	96281885	96281966	7	3	2	18	0.165059	-0.584963	YES	NO
chr6_82_tRNAGly_GCC+|+|chr6:142578776-142578846	TRG-GCC6-1	chr6	142578776	142578846	36	29	4	4	0.161751	0	YES	NO
chr6_20_tRNAAla_AGC+|+|chr6:26687485-26687557	TRA-AGC10-1	chr6	26687485	26687557	9	5	9	0	0.156119	0.378512	YES	YES
chr12_16_Pseudo_TTG-|-|chr12:50211190-50211264	NMTRQ-TTG6-1	chr12	50211190	50211264	9	5	16	12	0.156119	0.131245	YES	NO
AluSx_SINE_55294966|+|chr19:50602858-50603138	N/A	chr19	50602858	50603138	89	77	13	35	0.153351	-0.596103	YES	YES
chr1_16_tRNAHis_GTG+|+|chr1:146544773-146544844	TRH-GTG1-2	chr1	146544773	146544844	10	6	7	2	0.152003	0.209453	YES	YES
chr16_31_Pseudo_TGG-|-|chr16:3220961-3221031	TRP-TGG4-1	chr16	3220961	3221031	10	6	7	6	0.152003	0.0395284	YES	NO
chr16_29_tRNAPro_AGG-|-|chr16:3232635-3232706	TRP-AGG2-7	chr16	3232635	3232706	22	17	11	12	0.145851	-0.0347654	YES	NO
RUNDC2C_Intronic_AluSg|+|chr16:29351318-29351759	N/A	chr16	29351318	29351759	34	28	23	12	0.142019	0.335603	YES	YES
5S_rRNA-related_10|-|chr12:104519013-104519103	RN5S@	chr12	104519013	104519103	35	29	5	6	0.139725	-0.040642	YES	YES
chr6_36_tRNAArg_ACG+|+|chr6:27182952-27183024	TRR-ACG2-3	chr6	27182952	27183024	36	30	32	6	0.137504	0.784271	YES	YES
chr9_7_tRNAHis_GTG-|-|chr9:14433938-14434009	TRH-GTG1-6	chr9	14433938	14434009	14	10	40	14	0.137504	0.669851	YES	YES
MIRb_SINE_MIR_146808377|+|chr4:146808377-146808458	N/A	chr4	146808377	146808458	3	0	9	10	0.137504	-0.0365259	YES	NO
chr16_7_tRNALys_CTT+|+|chr16:3225692-3225764	TRK-CTT2-5	chr16	3225692	3225764	14	10	7	8	0.137504	-0.0384741	YES	NO
chr12_15_Pseudo_TTG-|-|chr12:97490691-97490764	TRQ-TTG9-1	chr12	97490691	97490764	3	0	4	12	0.137504	-0.304855	YES	NO
chr5_12_tRNAVal_AAC-|-|chr5:180645270-180645342	TRV-AAC1-4	chr5	180645270	180645342	15	11	7	8	0.134301	-0.0384741	YES	NO
chr6_69_tRNAThr_AGT+|+|chr6:28693795-28693868	TRT-AGT3-1	chr6	28693795	28693868	4	1	14	14	0.133267	0	YES	YES
chr16_9_tRNAPro_AGG+|+|chr16:3239634-3239705	TRP-AGG2-8	chr16	3239634	3239705	4	1	2	6	0.133267	-0.169925	YES	NO
chr1_119_tRNALys_CTT-|-|chr1:145395522-145395594	TRK-CTT2-1	chr1	145395522	145395594	16	12	21	6	0.131245	0.5025	YES	NO
chr17_15_tRNACys_GCA+|+|chr17:37023898-37023969	TRC-GCA2-2	chr17	37023898	37023969	16	12	11	2	0.131245	0.357552	YES	YES
AluY_SINE_Alu_80572362|+|chr7:80572362-80572508	N/A	chr7	80572362	80572508	16	12	9	6	0.131245	0.115477	YES	YES
chr1_101_tRNAAsn_GTT-|-|chr1:149284503-149284576	TRN-GTT15-1	chr1	149284503	149284576	28	23	16	18	0.130061	-0.0614005	YES	NO
chr16_22_tRNAMet_CAT-|-|chr16:87417628-87417700	TRM-CAT6-1	chr16	87417628	87417700	5	2	11	4	0.129283	0.270089	YES	NO
chr1_65_tRNAPro_AGG-|-|chr1:167684725-167684796	TRP-AGG2-1	chr1	167684725	167684796	5	2	7	4	0.129283	0.121991	YES	NO
chr6_48_tRNAAsp_GTC+|+|chr6:27471523-27471594	TRD-GTC2-7	chr6	27471523	27471594	5	2	4	2	0.129283	0.0874628	YES	NO
chr17_37_tRNAPro_CGG-|-|chr17:8126151-8126222	TRP-CGG1-3	chr17	8126151	8126222	5	2	2	2	0.129283	0	YES	NO
chr6_94_tRNAAla_AGC-|-|chr6:58142589-58142661	TRA-AGC19-1	chr6	58142589	58142661	5	2	2	4	0.129283	-0.0874628	YES	YES
chr6_65_tRNAAla_AGC+|+|chr6:28574933-28575004	TRA-AGC3-1	chr6	28574933	28575004	5	2	11	16	0.129283	-0.16601	YES	NO
chr15_3_tRNACys_GCA+|+|chr15:80036997-80037069	TRC-GCA5-1	chr15	80036997	80037069	17	13	30	10	0.128324	0.584963	YES	YES
chr7_14_tRNACys_GCA+|+|chr7:149361915-149361986	TRC-GCA21-1	chr7	149361915	149361986	6	3	9	2	0.125531	0.285402	YES	YES
chr7_9_tRNATyr_GTA+|+|chr7:149255133-149255205	TRY-GTA10-1	chr7	149255133	149255205	6	3	16	14	0.125531	0.0641303	YES	NO
chr3_3_tRNAAsp_GTC-|-|chr3:184366095-184366165	TRD-GTC6-1	chr3	184366095	184366165	30	25	7	6	0.125531	0.0395284	YES	NO
chr7_10_tRNACys_GCA+|+|chr7:149281816-149281887	TRC-GCA15-1	chr7	149281816	149281887	6	3	4	4	0.125531	0	YES	YES
chr2_24_Pseudo_CTC-|-|chr2:96217194-96217265	TRE-CTC13-1	chr2	96217194	96217265	6	3	0	6	0.125531	-0.263034	YES	NO
AluY_SINE_Alu_37641843|+|chr18:37641843-37642141	N/A	chr18	37641843	37642141	43	37	42	12	0.123735	0.777608	YES	YES
chr9_2_tRNAArg_TCG+|+|chr9:112960803-112960875	TRR-TCG6-1	chr9	112960803	112960875	19	15	14	8	0.122857	0.211504	YES	YES
hsa-mir-1978|+|chr2:149639365-149639417	N/A	chr2	149639365	149639417	185	168	240	271	0.118836	-0.156804	YES	NO
chr1_46_tRNAAsp_GTC+|+|chr1:161501915-161501986	TRD-GTC7-1	chr1	161501915	161501986	8	5	11	12	0.118644	-0.0347654	YES	NO
chr17_14_tRNAThr_CGT+|+|chr17:29877093-29877164	TRT-CGT4-1	chr17	29877093	29877164	8	5	4	6	0.118644	-0.0824622	YES	YES
chr7_6_tRNACys_GCA+|+|chr7:149028220-149028291	TRC-GCA9-2	chr7	149028220	149028291	9	6	14	4	0.115477	0.371969	YES	YES
chr6_134_tRNALeu_TAA-|-|chr6:27688898-27688980	TRL-TAA2-1	chr6	27688898	27688980	9	6	14	6	0.115477	0.289507	YES	YES
chr7_26_Pseudo_TTG-|-|chr7:57253980-57254051	NMTRQ-TTG13-1	chr7	57253980	57254051	9	6	14	6	0.115477	0.289507	YES	NO
chr6_57_tRNAIle_AAT+|+|chr6:27636362-27636435	TRI-AAT8-1	chr6	27636362	27636435	9	6	11	4	0.115477	0.270089	YES	YES
chr17_22_tRNAUndet_???-|-|chr17:66390957-66391031	TRU-NNN5-1	chr17	66390957	66391031	9	6	4	0	0.115477	0.180572	YES	NO
chr6_107_tRNAAla_TGC-|-|chr6:28770577-28770647	TRA-TGC7-1	chr6	28770577	28770647	9	6	11	10	0.115477	0.0356239	YES	YES
chr14_5_tRNATyr_GTA_I+|+|chr14:21151432-21151520	TRY-GTA5-5	chr14	21151432	21151520	9	6	4	4	0.115477	0	YES	NO
chr5_13_tRNAThr_TGT-|-|chr5:180618687-180618758	TRT-TGT6-1	chr5	180618687	180618758	9	6	0	2	0.115477	-0.0931094	YES	NO
chr13_5_tRNAGlu_TTC-|-|chr13:41634874-41634945	TRE-TTC1-2	chr13	41634874	41634945	9	6	7	10	0.115477	-0.112475	YES	NO
chr5_7_tRNALeu_AAG+|+|chr5:180614701-180614782	TRL-AAG2-1	chr5	180614701	180614782	9	6	2	8	0.115477	-0.247928	YES	NO
chr20_4_Pseudo_TAA-|-|chr20:55933428-55933502	NMTRL-TAA5-1	chr20	55933428	55933502	10	7	14	14	0.112475	0	YES	NO
MIR_SINE_MIR_25183668|+|chr10:25183668-25183785	N/A	chr10	25183668	25183785	10	7	9	10	0.112475	-0.0365259	YES	YES
chr6_56_tRNAPhe_GAA+|+|chr6:27632545-27632620	TRF-GAA7-1	chr6	27632545	27632620	38	33	35	32	0.110183	0.0681715	YES	YES
chr2_15_Pseudo_CTG+|+|chr2:219491132-219491207	TRQ-CTG16-1	chr2	219491132	219491207	11	8	18	6	0.109624	0.415037	YES	NO
chr6_163_tRNAIle_AAT-|-|chr6:26745255-26745328	TRI-AAT6-1	chr6	26745255	26745328	11	8	11	6	0.109624	0.187627	YES	YES
chr6_142_tRNAMet_CAT-|-|chr6:27560600-27560671	TRX-CAT1-6	chr6	27560600	27560671	11	8	16	14	0.109624	0.0641303	YES	YES
chr7_1_tRNATrp_CCA+|+|chr7:99067307-99067378	TRW-CCA5-1	chr7	99067307	99067378	11	8	7	8	0.109624	-0.0384741	YES	YES
chr17_8_tRNAThr_AGT+|+|chr17:8090478-8090551	TRT-AGT1-1	chr17	8090478	8090551	13	10	11	6	0.104337	0.187627	YES	YES
chr22_1_tRNASeC(e)_TCA+|+|chr22:44546537-44546622	TRZ-TCA2-1	chr22	44546537	44546622	60	54	21	12	0.0995357	0.280108	YES	YES
chr1_33_Pseudo_???+|+|chr1:161390661-161390733	TRU-NNN3-1	chr1	161390661	161390733	15	12	11	8	0.0995357	0.109624	YES	NO
chr9_1_tRNAMet_CAT+|+|chr9:19403996-19404070	TRX-CAT3-1	chr9	19403996	19404070	18	15	9	4	0.0931094	0.197939	YES	NO
chr1_131_Pseudo_CAC-|-|chr1:16874160-16874232	TRV-CAC11-1	chr1	16874160	16874232	2	0	7	5	0.0931094	0.0801703	NO	NO
chr2_7_Pseudo_AGG+|+|chr2:77895593-77895663	TRP-AGG5-1	chr2	77895593	77895663	2	0	1	1	0.0931094	0	YES	NO
chr6_77_tRNAGlu_CTC+|+|chr6:28949976-28950047	TRE-CTC1-6	chr6	28949976	28950047	2	0	2	2	0.0931094	0	YES	NO
chr4_4_tRNAGln_TTG-|-|chr4:40908743-40908815	TRQ-TTG6-1	chr4	40908743	40908815	19	16	9	8	0.0911479	0.0374747	YES	NO
chr1_121_tRNAGln_CTG-|-|chr1:144839436-144839507	TRQ-CTG8-1	chr1	144839436	144839507	3	1	11	4	0.0901978	0.270089	YES	YES
chr6_86_Pseudo_TAC-|-|chr6:156869046-156869120	NMTRV-TAC1-1	chr6	156869046	156869120	3	1	4	0	0.0901978	0.180572	NO	NO
chr10_2_tRNASer_TGA+|+|chr10:69524261-69524342	TRS-TGA1-1	chr10	69524261	69524342	3	1	4	4	0.0901978	0	YES	NO
chr1_129_tRNAVal_CAC-|-|chr1:17006501-17006573	TRV-CAC10-1	chr1	17006501	17006573	3	1	0	10	0.0901978	-0.415037	YES	NO
chr19_3_tRNALys_TTT+|+|chr19:19852207-19852277	TRK-TTT16-1	chr19	19852207	19852277	20	17	9	2	0.0892673	0.285402	YES	NO
chr1_67_tRNALeu_CAG-|-|chr1:161500132-161500214	TRL-CAG1-6	chr1	161500132	161500214	4	2	14	6	0.0874628	0.289507	YES	NO
chr3_8_tRNAGlu_CTC-|-|chr3:125413177-125413248	TRE-CTC8-1	chr3	125413177	125413248	4	2	11	10	0.0874628	0.0356239	YES	NO
chr14_2_tRNALeu_TAG+|+|chr14:21093529-21093610	TRL-TAG2-1	chr14	21093529	21093610	4	2	2	6	0.0874628	-0.169925	YES	NO
5S_rRNA-related_7|+|chr3:179879672-179879765	RN5S@	chr3	179879672	179879765	4	2	9	20	0.0874628	-0.358454	YES	YES
chr6_29_tRNAIle_TAT_I+|+|chr6:26988125-26988218	TRI-TAT2-2	chr6	26988125	26988218	4	2	4	16	0.0874628	-0.436099	YES	NO
chr6_139_tRNAVal_AAC-|-|chr6:27618707-27618779	TRV-AAC3-1	chr6	27618707	27618779	5	3	16	6	0.0848889	0.353637	YES	YES
chr1_89_tRNAAsn_GTT-|-|chr1:149711798-149711871	TRN-GTT8-1	chr1	149711798	149711871	5	3	9	4	0.0848889	0.197939	YES	NO
chr1_26_tRNAAsn_GTT+|+|chr1:148248115-148248188	TRN-GTT2-1	chr1	148248115	148248188	5	3	11	6	0.0848889	0.187627	YES	NO
chr12_4_tRNAAsp_GTC+|+|chr12:96429799-96429870	TRD-GTC2-8	chr12	96429799	96429870	5	3	7	4	0.0848889	0.121991	YES	NO
chr4_5_Pseudo_TTA-|-|chr4:7325838-7325909	TR*-TTA3-1	chr4	7325838	7325909	5	3	2	2	0.0848889	0	YES	NO
chr3_1_Pseudo_CTA+|+|chr3:13833886-13833953	TR*-CTA2-1	chr3	13833886	13833953	5	3	4	12	0.0848889	-0.304855	YES	NO
HVG2_hsa-mir-886|-|chr5:135416177-135416297	N/A	chr5	135416177	135416297	5	3	2	10	0.0848889	-0.321928	YES	NO
chr2_13_tRNAAla_CGC+|+|chr2:157257281-157257352	TRA-CGC3-1	chr2	157257281	157257352	5	3	0	8	0.0848889	-0.341037	YES	NO
chr1_25_tRNAAsn_GTT+|+|chr1:148000805-148000878	TRN-GTT7-1	chr1	148000805	148000878	5	3	0	10	0.0848889	-0.415037	NO	NO
chr6_9_tRNAVal_CAC+|+|chr6:26538282-26538354	TRV-CAC1-6	chr6	26538282	26538354	6	4	9	0	0.0824622	0.378512	YES	NO
HUERS-P1_LTR_ERV1|+|chr8:90416283-90416678	N/A	chr8	90416283	90416678	6	4	16	8	0.0824622	0.275634	YES	NO
chr7_19_tRNACys_GCA-|-|chr7:149292305-149292376	TRC-GCA23-1	chr7	149292305	149292376	6	4	16	10	0.0824622	0.201634	YES	YES
chr6_113_tRNAAla_TGC-|-|chr6:28726141-28726212	TRA-TGC6-1	chr6	28726141	28726212	6	4	9	8	0.0824622	0.0374747	YES	YES
chr1_81_tRNAAsp_GTC-|-|chr1:161410615-161410686	TRD-GTC2-1	chr1	161410615	161410686	6	4	0	2	0.0824622	-0.0931094	YES	NO
chr1_102_Pseudo_TTC-|-|chr1:149278785-149278857	TRE-TTC10-1	chr1	149278785	149278857	6	4	7	16	0.0824622	-0.314109	YES	NO
chr16_26_tRNALeu_CAG-|-|chr16:57334392-57334474	TRL-CAG2-2	chr16	57334392	57334474	7	5	30	20	0.0801703	0.263034	YES	NO
chr2_20_tRNAGlu_TTC-|-|chr2:131094701-131094772	TRE-TTC1-1	chr2	131094701	131094772	7	5	7	4	0.0801703	0.121991	YES	NO
chr5_11_tRNALys_CTT-|-|chr5:180648979-180649051	TRK-CTT2-3	chr5	180648979	180649051	7	5	2	12	0.0801703	-0.392317	YES	NO
chr8_10_tRNAMet_CAT-|-|chr8:124169470-124169542	TRM-CAT1-1	chr8	124169470	124169542	8	6	21	4	0.0780025	0.584963	YES	YES
chr17_27_tRNACys_GCA-|-|chr17:37309987-37310058	TRC-GCA2-3	chr17	37309987	37310058	8	6	11	2	0.0780025	0.357552	YES	YES
chr17_16_tRNAGln_TTG+|+|chr17:47269890-47269961	TRQ-TTG1-1	chr17	47269890	47269961	8	6	7	0	0.0780025	0.302563	YES	YES
chr1_136_Pseudo_???-|-|chr1:7990339-7990408	TRU-NNN4-1	chr1	7990339	7990408	27	24	0	6	0.0780025	-0.263034	YES	NO
chr14_18_tRNATyr_GTA_I-|-|chr14:21125623-21125716	TRY-GTA4-1	chr14	21125623	21125716	8	6	2	10	0.0780025	-0.321928	YES	NO
hY1_RNA|-|chr7:148684228-148684340	RNY1	chr7	148684228	148684340	9	7	28	10	0.0759489	0.536053	YES	YES
chr6_12_tRNAPro_AGG+|+|chr6:26555498-26555569	TRP-AGG2-2	chr6	26555498	26555569	9	7	14	8	0.0759489	0.211504	YES	NO
chr16_33_Pseudo_AGG-|-|chr16:3202609-3202680	TRP-AGG6-1	chr16	3202609	3202680	9	7	9	8	0.0759489	0.0374747	YES	YES
chr2_5_tRNAIle_TAT_I+|+|chr2:43037676-43037768	TRI-TAT2-1	chr2	43037676	43037768	9	7	7	8	0.0759489	-0.0384741	YES	NO
chr11_8_tRNASer_GCT+|+|chr11:66115591-66115672	TRS-GCT3-1	chr11	66115591	66115672	9	7	0	8	0.0759489	-0.341037	YES	NO
chr6_99_tRNAGln_CTG-|-|chr6:28909378-28909449	TRQ-CTG1-3	chr6	28909378	28909449	11	9	23	8	0.0721498	0.479993	YES	YES
chr1_88_Pseudo_CCT-|-|chr1:149728271-149728341	TRR-CCT8-1	chr1	149728271	149728341	13	11	7	10	0.0687128	-0.112475	YES	NO
chr17_11_tRNASup_CTA+|+|chr17:15408685-15408758	TR*-CTA1-1	chr17	15408685	15408758	13	11	11	16	0.0687128	-0.16601	YES	YES
chr17_35_tRNASer_AGA-|-|chr17:8129928-8130009	TRS-AGA2-6	chr17	8129928	8130009	17	15	32	20	0.0627358	0.31034	YES	NO
chr7_17_tRNACys_GCA-|-|chr7:149344046-149344117	TRC-GCA12-1	chr7	149344046	149344117	17	15	9	18	0.0627358	-0.29956	YES	YES
chr5_22_tRNAAsp_GTC-|-|chr5:141773988-141774059	TRD-GTC5-1	chr5	141773988	141774059	20	18	7	4	0.0588937	0.121991	YES	NO
chr17_25_tRNASeC_TCA-|-|chr17:38273553-38273626	TRZ-TCA3-1	chr17	38273553	38273626	45	42	21	18	0.0588937	0.0874628	YES	YES
PTPRM|+|chr18:8026571-8026971	N/A	chr18	8026571	8026971	20	18	25	26	0.0588937	-0.0259952	YES	YES
AluY_SINE_Alu_39162319|+|chr12:39162319-39162611	N/A	chr12	39162319	39162611	26	24	16	14	0.0524674	0.0641303	YES	YES
5S_rRNA-related_9|+|chr9:66458015-66458415	RN5S@	chr9	66458015	66458415	117	112	65	63	0.0499252	0.0306968	YES	YES
chr6_68_tRNAAla_AGC+|+|chr6:28687481-28687552	TRA-AGC7-1	chr6	28687481	28687552	1	0	9	2	0.0473057	0.285402	YES	NO
SNAR-A3-A11_SNAR-A14_2|-|chr19:50595746-50595866	SNAR-A4	chr19	50595746	50595866	1	0	0	1	0.0473057	-0.0473057	YES	NO
SNAR-A3-A11_SNAR-A14_3|-|chr19:50601083-50601203	SNAR-A14	chr19	50601083	50601203	1	0	0	1	0.0473057	-0.0473057	YES	NO
SNAR-A3-A11_SNAR-A14_4|-|chr19:50604148-50604268	SNAR-A5	chr19	50604148	50604268	1	0	0	1	0.0473057	-0.0473057	YES	NO
SNAR-A3-A11_SNAR-A14_5|-|chr19:50607212-50607332	SNAR-A6	chr19	50607212	50607332	1	0	0	1	0.0473057	-0.0473057	YES	NO
SNAR-A3-A11_SNAR-A14_6|-|chr19:50610271-50610391	SNAR-A7	chr19	50610271	50610391	1	0	0	1	0.0473057	-0.0473057	YES	NO
SNAR-A3-A11_SNAR-A14_7|-|chr19:50615625-50615745	SNAR-A8	chr19	50615625	50615745	1	0	0	1	0.0473057	-0.0473057	YES	NO
SNAR-A3-A11_SNAR-A14_9|-|chr19:50626331-50626451	SNAR-A10	chr19	50626331	50626451	1	0	0	1	0.0473057	-0.0473057	YES	NO
SNAR-A3-A11_SNAR-A14_10|-|chr19:50631659-50631779	SNAR-A11	chr19	50631659	50631779	1	0	0	1	0.0473057	-0.0473057	YES	NO
chr1_4_tRNAGly_CCC+|+|chr1:17188416-17188486	TRG-CCC1-2	chr1	17188416	17188486	1	0	2	4	0.0473057	-0.0874628	NO	NO
chr1_62_tRNALys_TTT-|-|chr1:204476158-204476230	TRK-TTT3-2	chr1	204476158	204476230	1	0	2	8	0.0473057	-0.247928	YES	NO
chr6_147_tRNASer_AGA-|-|chr6:27509554-27509635	TRS-AGA1-1	chr6	27509554	27509635	1	0	2	14	0.0473057	-0.459432	YES	NO
chr6_144_tRNAAsp_GTC-|-|chr6:27551236-27551307	TRD-GTC3-1	chr6	27551236	27551307	2	1	7	0	0.0458037	0.302563	YES	NO
chr6_175_tRNASer_GCT-|-|chr6:26305718-26305801	TRS-GCT6-1	chr6	26305718	26305801	2	1	7	2	0.0458037	0.209453	YES	NO
chr6_81_tRNALeu_TAA+|+|chr6:69914378-69914460	TRL-TAA5-1	chr6	69914378	69914460	2	1	2	0	0.0458037	0.0931094	YES	YES
chr2_27_tRNAGly_CCC-|-|chr2:70476123-70476193	TRG-CCC2-1	chr2	70476123	70476193	2	1	7	6	0.0458037	0.0395284	YES	NO
chr8_1_Pseudo_CTC+|+|chr8:11793380-11793451	TRE-CTC11-1	chr8	11793380	11793451	2	1	2	2	0.0458037	0	YES	NO
chr11_6_Pseudo_TGC+|+|chr11:60763508-60763577	TRA-TGC10-1	chr11	60763508	60763577	3	2	9	6	0.0443941	0.115477	NO	NO
chr1_120_tRNAGln_CTG-|-|chr1:145379320-145379391	TRQ-CTG8-2	chr1	145379320	145379391	3	2	4	4	0.0443941	0	YES	YES
chr6_123_tRNASer_GCT-|-|chr6:28565117-28565198	TRS-GCT4-1	chr6	28565117	28565198	3	2	2	2	0.0443941	0	YES	NO
chr20_7_Pseudo_CTC-|-|chr20:13970470-13970541	TRE-CTC10-1	chr20	13970470	13970541	4	3	30	10	0.0430687	0.584963	NO	NO
chr6_18_tRNAAla_AGC+|+|chr6:26673590-26673662	TRA-AGC14-1	chr6	26673590	26673662	4	3	9	0	0.0430687	0.378512	YES	YES
chr6_127_tRNAThr_TGT-|-|chr6:28442329-28442402	TRT-TGT1-1	chr6	28442329	28442402	4	3	11	2	0.0430687	0.357552	YES	YES
chr6_7_tRNALeu_CAG+|+|chr6:26521436-26521518	TRL-CAG1-7	chr6	26521436	26521518	4	3	7	0	0.0430687	0.302563	YES	NO
chr6_126_tRNALeu_AAG-|-|chr6:28446400-28446481	TRL-AAG4-1	chr6	28446400	28446481	4	3	7	2	0.0430687	0.209453	YES	NO
chr6_63_tRNAIle_TAT_I+|+|chr6:28505367-28505460	TRI-TAT3-1	chr6	28505367	28505460	4	3	7	2	0.0430687	0.209453	YES	NO
chr6_76_tRNALys_TTT+|+|chr6:28918806-28918878	TRK-TTT3-3	chr6	28918806	28918878	4	3	4	0	0.0430687	0.180572	YES	NO
chr13_3_tRNAGlu_TTC-|-|chr13:45492062-45492133	TRE-TTC2-1	chr13	45492062	45492133	4	3	4	0	0.0430687	0.180572	YES	NO
chr6_71_tRNALys_TTT+|+|chr6:28715521-28715593	TRK-TTT7-1	chr6	28715521	28715593	4	3	11	8	0.0430687	0.109624	YES	NO
chr13_6_Pseudo_TTG-|-|chr13:36639747-36639818	NMTRQ-TTG10-1	chr13	36639747	36639818	4	3	7	6	0.0430687	0.0395284	YES	NO
chr1_125_Pseudo_???-|-|chr1:108496275-108496345	TRU-NNN8-1	chr1	108496275	108496345	4	3	4	4	0.0430687	0	YES	YES
chr2_18_Pseudo_CTC-|-|chr2:159738171-159738242	TRE-CTC7-1	chr2	159738171	159738242	4	3	2	2	0.0430687	0	YES	NO
VTRNA1-3|+|chr5:140105743-140105831	VTRNA1-3	chr5	140105743	140105831	4	3	4	4	0.0430687	0	YES	NO
chr6_105_tRNAAla_AGC-|-|chr6:28779849-28779920	TRA-AGC6-1	chr6	28779849	28779920	4	3	2	2	0.0430687	0	YES	NO
chrX_4_tRNAVal_TAC-|-|chrX:18693029-18693101	TRV-TAC1-2	chrX	18693029	18693101	4	3	4	4	0.0430687	0	YES	NO
chr6_133_tRNAVal_CAC-|-|chr6:27696327-27696399	TRV-CAC7-1	chr6	27696327	27696399	4	3	7	8	0.0430687	-0.0384741	YES	NO
chr17_2_tRNALys_TTT+|+|chr17:8022473-8022545	TRK-TTT3-5	chr17	8022473	8022545	4	3	7	8	0.0430687	-0.0384741	YES	NO
chr6_101_tRNAAla_AGC-|-|chr6:28831462-28831533	TRA-AGC2-2	chr6	28831462	28831533	4	3	2	4	0.0430687	-0.0874628	YES	NO
chr7_11_tRNACys_GCA+|+|chr7:149295046-149295117	TRC-GCA20-1	chr7	149295046	149295117	4	3	4	8	0.0430687	-0.160465	YES	YES
chr16_20_tRNAMet_CAT+|+|chr16:71460396-71460468	TRM-CAT2-1	chr16	71460396	71460468	4	3	4	8	0.0430687	-0.160465	YES	NO
chr11_10_tRNASer_AGA+|+|chr11:109036039-109036120	TRS-AGA6-1	chr11	109036039	109036120	4	3	2	6	0.0430687	-0.169925	YES	NO
chr1_17_Pseudo_TTC+|+|chr1:146550178-146550249	TRE-TTC14-1	chr1	146550178	146550249	4	3	0	4	0.0430687	-0.180572	YES	NO
chr16_25_tRNAGly_GCC-|-|chr16:70812114-70812184	TRG-GCC3-1	chr16	70812114	70812184	4	3	11	18	0.0430687	-0.22741	YES	NO
chr6_14_tRNATyr_GTA_I+|+|chr6:26569086-26569176	TRY-GTA1-1	chr6	26569086	26569176	4	3	4	12	0.0430687	-0.304855	YES	NO
chr17_38_tRNAAsp_GTC-|-|chr17:8125556-8125627	TRD-GTC2-11	chr17	8125556	8125627	4	3	4	12	0.0430687	-0.304855	YES	NO
chr17_29_tRNACys_GCA-|-|chr17:37017937-37018008	TRC-GCA14-1	chr17	37017937	37018008	4	3	2	10	0.0430687	-0.321928	YES	YES
chr6_93_tRNAAla_AGC-|-|chr6:58164628-58164700	TRA-AGC13-2	chr6	58164628	58164700	4	3	0	8	0.0430687	-0.341037	YES	YES
chr6_102_tRNAAla_AGC-|-|chr6:28806221-28806292	TRA-AGC2-1	chr6	28806221	28806292	4	3	2	14	0.0430687	-0.459432	YES	NO
U6-8|-|chr14:32672369-32672475	RNU6-8	chr14	32672369	32672475	4	3	0	14	0.0430687	-0.552541	YES	NO
POLR3E_Intronic_MIR_repeat|+|chr16:22309683-22310083	N/A	chr16	22309683	22310083	4	3	0	14	0.0430687	-0.552541	YES	YES
chr5_1_Pseudo_ACA_I+|+|chr5:151988596-151988771	TRC-ACA1-1	chr5	151988596	151988771	5	4	7	8	0.0418202	-0.0384741	YES	NO
chr17_42_tRNALeu_TAG-|-|chr17:8023632-8023713	TRL-TAG1-1	chr17	8023632	8023713	6	5	11	10	0.040642	0.0356239	YES	NO
chr6_70_tRNAAla_CGC+|+|chr6:28697092-28697163	TRA-CGC4-1	chr6	28697092	28697163	6	5	0	8	0.040642	-0.341037	NO	NO
chr1_106_tRNAHis_GTG-|-|chr1:149155828-149155899	TRH-GTG2-1	chr1	149155828	149155899	6	5	0	10	0.040642	-0.415037	YES	YES
chr6_31_tRNASer_GCT+|+|chr6:27065085-27065166	TRS-GCT1-1	chr6	27065085	27065166	7	6	16	14	0.0395284	0.0641303	YES	NO
chr18_2_Pseudo_TCC+|+|chr18:55345854-55345925	TRG-TCC5-1	chr18	55345854	55345925	8	7	0	0	0.0384741	0	YES	NO
chr21_1_tRNASup_TTA+|+|chr21:15926516-15926586	TR*-TTA2-1	chr21	15926516	15926586	8	7	14	18	0.0384741	-0.125531	YES	NO
chr5_17_Pseudo_AAG-|-|chr5:180591564-180591645	TRL-AAG7-1	chr5	180591564	180591645	8	7	2	14	0.0384741	-0.459432	YES	NO
chr6_72_tRNAPhe_GAA+|+|chr6:28732164-28732236	TRF-GAA5-1	chr6	28732164	28732236	9	8	14	0	0.0374747	0.552541	YES	YES
chr6_61_tRNAMet_CAT+|+|chr6:27745664-27745735	TRX-CAT2-1	chr6	27745664	27745735	9	8	16	2	0.0374747	0.523562	YES	YES
chr16_16_tRNALeu_AAG+|+|chr16:22308461-22308542	TRL-AAG2-4	chr16	22308461	22308542	9	8	2	8	0.0374747	-0.247928	YES	NO
chr13_7_tRNAAsn_GTT-|-|chr13:31248101-31248174	TRN-GTT2-4	chr13	31248101	31248174	9	8	0	6	0.0374747	-0.263034	YES	NO
chr1_7_tRNAAsn_GTT+|+|chr1:17216172-17216245	TRN-GTT4-1	chr1	17216172	17216245	9	8	4	14	0.0374747	-0.371969	YES	NO
chr1_47_tRNAAsn_GTT+|+|chr1:161510031-161510104	TRN-GTT1-1	chr1	161510031	161510104	10	9	25	4	0.0365259	0.693897	YES	YES
chr6_151_tRNAThr_CGT-|-|chr6:27271568-27271639	TRT-CGT6-1	chr6	27271568	27271639	10	9	21	6	0.0365259	0.5025	YES	YES
chr5_16_tRNALeu_AAG-|-|chr5:180601044-180601125	TRL-AAG1-3	chr5	180601044	180601125	10	9	11	8	0.0365259	0.109624	YES	NO
chr1_53_Pseudo_???+|+|chr1:178678038-178678110	TRU-NNN7-1	chr1	178678038	178678110	10	9	9	8	0.0365259	0.0374747	YES	YES
chr1_126_tRNACys_GCA-|-|chr1:93981834-93981906	TRC-GCA7-1	chr1	93981834	93981906	10	9	4	4	0.0365259	0	YES	YES
chr7_16_tRNACys_GCA-|-|chr7:149388272-149388343	TRC-GCA17-1	chr7	149388272	149388343	11	10	18	10	0.0356239	0.263034	YES	YES
chr1_100_Pseudo_GAA-|-|chr1:149287359-149287430	TRF-GAA9-1	chr1	149287359	149287430	11	10	9	8	0.0356239	0.0374747	YES	NO
chr17_4_tRNAArg_TCT_I+|+|chr17:8024243-8024330	TRR-TCT2-1	chr17	8024243	8024330	11	10	9	8	0.0356239	0.0374747	YES	NO
chr19_7_tRNALys_TTT-|-|chr19:50037933-50038005	TRK-TTT12-1	chr19	50037933	50038005	11	10	14	26	0.0356239	-0.347923	NO	NO
chr6_103_tRNAPhe_GAA-|-|chr6:28791093-28791166	TRF-GAA4-1	chr6	28791093	28791166	12	11	7	8	0.0347654	-0.0384741	YES	YES
chr6_138_tRNAArg_ACG-|-|chr6:27638344-27638416	TRR-ACG2-4	chr6	27638344	27638416	14	13	25	14	0.0331669	0.321928	YES	YES
chr6_112_tRNAPhe_GAA-|-|chr6:28731374-28731447	TRF-GAA6-1	chr6	28731374	28731447	16	15	16	4	0.0317089	0.436099	YES	YES
chr1_8_Pseudo_CTT+|+|chr1:39970195-39970267	TRK-CTT12-1	chr1	39970195	39970267	16	15	7	10	0.0317089	-0.112475	YES	NO
chr6_141_tRNALeu_CAA_I-|-|chr6:27570348-27570454	TRL-CAA3-1	chr6	27570348	27570454	18	17	9	12	0.0303736	-0.106915	YES	NO
chr17_24_tRNAThr_AGT-|-|chr17:62526918-62526991	TRT-AGT7-1	chr17	62526918	62526991	19	18	4	2	0.0297473	0.0874628	YES	YES
chr6_108_tRNAAla_AGC-|-|chr6:28763741-28763812	TRA-AGC1-1	chr6	28763741	28763812	19	18	7	6	0.0297473	0.0395284	YES	YES
chr1_98_tRNAVal_CAC-|-|chr1:149298555-149298627	TRV-CAC4-1	chr1	149298555	149298627	19	18	14	14	0.0297473	0	YES	NO
chr20_1_tRNAGln_CTG+|+|chr20:17855142-17855219	TRQ-CTG17-1	chr20	17855142	17855219	20	19	21	20	0.0291463	0.0285692	YES	NO
MIR_SINE_MIR_103806446|+|chr10:103806446-103806520	N/A	chr10	103806446	103806520	22	21	2	8	0.0280144	-0.247928	YES	NO
AluY_SINE_Alu_118157931|+|chrX:118157931-118158236	N/A	chrX	118157931	118158236	35	34	30	12	0.0223678	0.514573	YES	YES
chr4_1_Pseudo_TTG+|+|chr4:156383888-156383959	NMTRQ-TTG15-1	chr4	156383888	156383959	5	5	23	6	0	0.557995	YES	NO
AluJo_SINE_Alu|+|chr6:111563459-111563761	N/A	chr6	111563459	111563761	21	21	14	0	0	0.552541	YES	YES
chr15_10_tRNASer_GCT-|-|chr15:40886023-40886104	TRS-GCT4-2	chr15	40886023	40886104	4	4	25	8	0	0.533432	YES	NO
chr7_24_Pseudo_GTA-|-|chr7:149053745-149053820	TRY-GTA11-1	chr7	149053745	149053820	3	3	11	0	0	0.450661	YES	YES
chr1_99_tRNAVal_CAC-|-|chr1:149294666-149294736	TRV-CAC8-1	chr1	149294666	149294736	3	3	11	2	0	0.357552	NO	NO
chr6_116_Pseudo_GAA-|-|chr6:28694855-28694927	TRF-GAA11-1	chr6	28694855	28694927	5	5	11	2	0	0.357552	YES	YES
chr1_44_Pseudo_GTC+|+|chr1:161492935-161493006	TRD-GTC10-1	chr1	161492935	161493006	3	3	9	2	0	0.285402	YES	NO
AluSq_SINE_Alu_150849456|+|chr1:150849456-150849752	N/A	chr1	150849456	150849752	26	26	18	10	0	0.263034	YES	YES
chr6_170_tRNATrp_CCA-|-|chr6:26319330-26319401	TRW-CCA3-1	chr6	26319330	26319401	4	4	18	10	0	0.263034	YES	YES
chr14_19_tRNATyr_GTA_I-|-|chr14:21121258-21121351	TRY-GTA5-3	chr14	21121258	21121351	3	3	7	2	0	0.209453	YES	NO
RNaseP_RNA|-|chr14:20811230-20811570	RPPH1	chr14	20811230	20811570	14	14	16	10	0	0.201634	YES	NO
chr14_20_tRNAThr_TGT-|-|chr14:21099319-21099391	TRT-TGT4-1	chr14	21099319	21099391	5	5	18	12	0	0.192645	YES	NO
chr6_114_tRNAArg_CCG-|-|chr6:28710729-28710801	TRR-CCG1-1	chr6	28710729	28710801	7	7	11	6	0	0.187627	YES	YES
chr15_9_tRNAHis_GTG-|-|chr15:45490804-45490875	TRH-GTG1-7	chr15	45490804	45490875	4	4	4	0	0	0.180572	YES	YES
AluY_SINE_Alu_62819118|+|chr2:62819118-62819430	N/A	chr2	62819118	62819430	51	51	30	24	0	0.152003	YES	YES
5S_rRNA-related_1|-|chr1:228746011-228746133	RN5S1@	chr1	228746011	228746133	1	1	3	0	0	0.137504	YES	YES
5S_rRNA-related_2|-|chr1:228748252-228748374	RN5S1@	chr1	228748252	228748374	1	1	3	0	0	0.137504	YES	YES
5S_rRNA-related_3|-|chr1:228750493-228750615	RN5S1@	chr1	228750493	228750615	1	1	3	0	0	0.137504	YES	YES
5S_rRNA-related_4|-|chr1:228752734-228752856	RN5S1@	chr1	228752734	228752856	1	1	3	0	0	0.137504	YES	YES
5S_rRNA-related_5|-|chr1:228754975-228755097	RN5S1@	chr1	228754975	228755097	1	1	3	0	0	0.137504	YES	YES
5S_rRNA-related_6|-|chr1:228757190-228757312	RN5S1@	chr1	228757190	228757312	1	1	3	0	0	0.137504	YES	YES
RN5S_1|-|chr1:228759411-228759532	RN5S1@	chr1	228759411	228759532	1	1	3	0	0	0.137504	YES	YES
RN5S_2|-|chr1:228761653-228761774	RN5S1@	chr1	228761653	228761774	1	1	3	0	0	0.137504	YES	YES
RN5S_4|-|chr1:228766134-228766255	RN5S1@	chr1	228766134	228766255	1	1	3	0	0	0.137504	YES	YES
RN5S_6|-|chr1:228770615-228770736	RN5S1@	chr1	228770615	228770736	1	1	3	0	0	0.137504	YES	YES
RN5S_7|-|chr1:228772840-228772961	RN5S1@	chr1	228772840	228772961	1	1	3	0	0	0.137504	YES	YES
RN5S_8|-|chr1:228775081-228775202	RN5S1@	chr1	228775081	228775202	1	1	3	0	0	0.137504	YES	YES
RN5S_9|-|chr1:228777312-228777433	RN5S1@	chr1	228777312	228777433	1	1	3	0	0	0.137504	YES	YES
RN5S_10|-|chr1:228779553-228779674	RN5S1@	chr1	228779553	228779674	1	1	3	0	0	0.137504	YES	YES
RN5S_11|-|chr1:228781784-228781905	RN5S1@	chr1	228781784	228781905	1	1	3	0	0	0.137504	YES	YES
chr2_6_tRNAGlu_TTC+|+|chr2:75124046-75124114	TRE-TTC13-1	chr2	75124046	75124114	0	0	9	6	0	0.115477	NO	NO
chr6_74_tRNALeu_CAA_I+|+|chr6:28908830-28908934	TRL-CAA1-2	chr6	28908830	28908934	4	4	11	8	0	0.109624	YES	NO
chr11_1_tRNALeu_CAA+|+|chr11:9296790-9296863	TRL-CAA5-1	chr11	9296790	9296863	12	12	11	8	0	0.109624	YES	NO
chr6_15_tRNATyr_GTA_I+|+|chr6:26575798-26575887	TRY-GTA8-1	chr6	26575798	26575887	3	3	2	0	0	0.0931094	YES	NO
chr6_67_tRNAAla_AGC+|+|chr6:28678366-28678437	TRA-AGC5-1	chr6	28678366	28678437	0	0	2	0	0	0.0931094	YES	NO
chr1_105_Pseudo_TTC-|-|chr1:149161628-149161699	TRE-TTC7-1	chr1	149161628	149161699	4	4	4	2	0	0.0874628	YES	NO
chr6_172_tRNASer_TGA-|-|chr6:26312824-26312905	TRS-TGA3-1	chr6	26312824	26312905	2	2	4	2	0	0.0874628	YES	NO
MER41B-int_LTR_ERV1|-|chr22:37589895-37590151	N/A	chr22	37589895	37590151	6	6	16	14	0	0.0641303	YES	NO
chr1_37_tRNAGly_GCC+|+|chr1:161420467-161420537	TRG-GCC1-2	chr1	161420467	161420537	0	0	1	0	0	0.0473057	YES	NO
chr1_41_tRNAGly_GCC+|+|chr1:161435258-161435328	TRG-GCC1-4	chr1	161435258	161435328	0	0	1	0	0	0.0473057	YES	NO
chr6_165_tRNAIle_AAT-|-|chr6:26721221-26721294	TRI-AAT7-1	chr6	26721221	26721294	0	0	1	0	0	0.0473057	YES	YES
chr6_28_tRNAIle_AAT+|+|chr6:26780832-26780905	TRI-AAT7-2	chr6	26780832	26780905	0	0	1	0	0	0.0473057	YES	YES
chr6_148_tRNASer_TGA-|-|chr6:27473607-27473688	TRS-TGA4-1	chr6	27473607	27473688	1	1	7	6	0	0.0395284	YES	NO
chr15_11_tRNAGlu_TTC-|-|chr15:26327381-26327452	TRE-TTC2-2	chr15	26327381	26327452	4	4	7	6	0	0.0395284	YES	NO
chr6_88_Pseudo_GAA-|-|chr6:79668010-79668082	TRF-GAA8-1	chr6	79668010	79668082	2	2	9	8	0	0.0374747	YES	YES
chr9_4_tRNAArg_TCT_I-|-|chr9:131102355-131102445	TRR-TCT3-1	chr9	131102355	131102445	8	8	9	8	0	0.0374747	YES	NO
chr16_28_tRNAPro_TGG-|-|chr16:3234133-3234204	TRP-TGG3-4	chr16	3234133	3234204	4	4	9	8	0	0.0374747	YES	NO
chr1_124_Pseudo_GTT-|-|chr1:143663558-143663631	TRN-GTT21-1	chr1	143663558	143663631	6	6	0	0	0	0	YES	NO
chr1_10_tRNAAsn_GTT+|+|chr1:143690028-143690101	TRN-GTT16-1	chr1	143690028	143690101	0	0	0	0	0	0	YES	NO
chr1_11_tRNAAsn_GTT+|+|chr1:144301611-144301684	TRN-GTT11-1	chr1	144301611	144301684	0	0	0	0	0	0	YES	NO
chr1_14_Pseudo_CCT+|+|chr1:145941579-145941649	TRR-CCT6-1	chr1	145941579	145941649	0	0	0	0	0	0	NO	NO
chr1_15_tRNAGln_CTG+|+|chr1:145963304-145963375	TRQ-CTG3-1	chr1	145963304	145963375	0	0	0	0	0	0	YES	YES
chr1_115_tRNAAsn_GTT-|-|chr1:145979034-145979107	TRN-GTT9-1	chr1	145979034	145979107	0	0	0	0	0	0	YES	NO
chr1_18_Pseudo_CCT+|+|chr1:147483291-147483361	TRR-CCT6-2	chr1	147483291	147483361	0	0	0	0	0	0	NO	NO
chr1_19_tRNAGln_CTG+|+|chr1:147505038-147505109	TRQ-CTG3-2	chr1	147505038	147505109	0	0	0	0	0	0	YES	YES
chr1_113_tRNAAsn_GTT-|-|chr1:147520767-147520840	TRN-GTT9-2	chr1	147520767	147520840	0	0	0	0	0	0	YES	NO
chr1_21_tRNAHis_GTG+|+|chr1:147753471-147753542	TRH-GTG1-3	chr1	147753471	147753542	0	0	0	0	0	0	YES	YES
chr1_111_tRNAHis_GTG-|-|chr1:147774845-147774916	TRH-GTG1-4	chr1	147774845	147774916	0	0	0	0	0	0	YES	YES
chr1_24_tRNAAsn_GTT+|+|chr1:147877537-147877610	TRN-GTT16-4	chr1	147877537	147877610	0	0	0	0	0	0	YES	NO
chr1_108_tRNAAsn_GTT-|-|chr1:148598314-148598387	TRN-GTT3-1	chr1	148598314	148598387	2	2	0	0	0	0	YES	NO
chr1_107_tRNAAsn_GTT-|-|chr1:148760356-148760429	TRN-GTT3-2	chr1	148760356	148760429	0	0	0	0	0	0	YES	NO
chr1_95_tRNAAsn_GTT-|-|chr1:149615617-149615690	TRN-GTT11-2	chr1	149615617	149615690	0	0	0	0	0	0	YES	NO
chr1_34_tRNALeu_CAG+|+|chr1:161411323-161411405	TRL-CAG1-1	chr1	161411323	161411405	0	0	0	0	0	0	YES	NO
chr1_35_tRNAGly_GCC+|+|chr1:161413094-161413164	TRG-GCC1-1	chr1	161413094	161413164	0	0	0	0	0	0	YES	NO
chr1_80_tRNAGlu_CTC-|-|chr1:161417018-161417089	TRE-CTC1-2	chr1	161417018	161417089	0	0	0	0	0	0	YES	NO
chr1_79_tRNAGly_TCC-|-|chr1:161417375-161417446	TRG-TCC2-2	chr1	161417375	161417446	0	0	0	0	0	0	YES	NO
chr1_78_tRNAAsp_GTC-|-|chr1:161418033-161418104	TRD-GTC2-2	chr1	161418033	161418104	0	0	0	0	0	0	YES	NO
chr1_36_tRNALeu_CAG+|+|chr1:161418741-161418823	TRL-CAG1-2	chr1	161418741	161418823	0	0	0	0	0	0	YES	NO
chr1_77_tRNAGlu_CTC-|-|chr1:161424398-161424469	TRE-CTC1-3	chr1	161424398	161424469	0	0	0	0	0	0	YES	NO
chr1_76_tRNAGly_TCC-|-|chr1:161424756-161424827	TRG-TCC2-3	chr1	161424756	161424827	0	0	0	0	0	0	YES	NO
chr1_75_tRNAAsp_GTC-|-|chr1:161425414-161425485	TRD-GTC2-3	chr1	161425414	161425485	0	0	0	0	0	0	YES	NO
chr1_39_tRNAGly_GCC+|+|chr1:161427898-161427968	TRG-GCC1-3	chr1	161427898	161427968	0	0	0	0	0	0	YES	NO
chr1_74_tRNAGlu_CTC-|-|chr1:161431809-161431880	TRE-CTC1-4	chr1	161431809	161431880	0	0	0	0	0	0	YES	NO
chr1_73_tRNAGly_TCC-|-|chr1:161432166-161432237	TRG-TCC2-4	chr1	161432166	161432237	0	0	0	0	0	0	YES	NO
chr1_72_tRNAAsp_GTC-|-|chr1:161432824-161432895	TRD-GTC2-4	chr1	161432824	161432895	0	0	0	0	0	0	YES	NO
chr1_40_tRNALeu_CAG+|+|chr1:161433532-161433614	TRL-CAG1-4	chr1	161433532	161433614	0	0	0	0	0	0	YES	NO
chr1_71_tRNAGlu_CTC-|-|chr1:161439189-161439260	TRE-CTC1-5	chr1	161439189	161439260	0	0	0	0	0	0	YES	NO
chr1_70_tRNAGly_TCC-|-|chr1:161439547-161439618	TRG-TCC2-5	chr1	161439547	161439618	0	0	0	0	0	0	YES	NO
chr1_42_tRNALeu_CAG+|+|chr1:161440913-161440995	TRL-CAG1-5	chr1	161440913	161440995	0	0	0	0	0	0	YES	NO
chr1_48_tRNAAsp_GTC+|+|chr1:161574588-161574659	TRD-GTC9-1	chr1	161574588	161574659	0	0	0	0	0	0	YES	NO
chr1_66_tRNALeu_CAA-|-|chr1:161581736-161581819	TRL-CAA6-1	chr1	161581736	161581819	0	0	0	0	0	0	YES	NO
chr1_49_tRNAGlu_TTC+|+|chr1:161582508-161582579	TRE-TTC5-1	chr1	161582508	161582579	0	0	0	0	0	0	YES	NO
chr1_50_tRNAAsn_GTT+|+|chr1:161591465-161591538	TRN-GTT17-1	chr1	161591465	161591538	0	0	0	0	0	0	YES	YES
chr5_2_tRNAVal_CAC+|+|chr5:180524070-180524142	TRV-CAC1-2	chr5	180524070	180524142	0	0	0	0	0	0	YES	NO
chr5_19_tRNALeu_AAG-|-|chr5:180524474-180524555	TRL-AAG1-1	chr5	180524474	180524555	0	0	0	0	0	0	YES	NO
chr5_3_tRNALeu_AAG+|+|chr5:180528840-180528921	TRL-AAG1-2	chr5	180528840	180528921	0	0	0	0	0	0	YES	NO
chr5_18_tRNAVal_CAC-|-|chr5:180529253-180529325	TRV-CAC1-3	chr5	180529253	180529325	0	0	0	0	0	0	YES	NO
chr6_23_tRNAAla_AGC+|+|chr6:26728256-26728328	TRA-AGC18-1	chr6	26728256	26728328	0	0	0	0	0	0	YES	YES
chr6_24_tRNAAla_AGC+|+|chr6:26730737-26730809	TRA-AGC9-1	chr6	26730737	26730809	0	0	0	0	0	0	YES	YES
chr6_164_tRNAMet_CAT-|-|chr6:26735574-26735646	TRM-CAT4-1	chr6	26735574	26735646	0	0	0	0	0	0	YES	NO
chr6_27_tRNAMet_CAT+|+|chr6:26766444-26766516	TRM-CAT4-3	chr6	26766444	26766516	0	0	0	0	0	0	YES	NO
chr6_161_tRNAAla_AGC-|-|chr6:26771290-26771362	TRA-AGC9-2	chr6	26771290	26771362	0	0	0	0	0	0	YES	YES
chr6_160_tRNAAla_AGC-|-|chr6:26773771-26773843	TRA-AGC18-2	chr6	26773771	26773843	0	0	0	0	0	0	YES	YES
hY5_RNA|+|chr7:148638579-148638663	RNY5	chr7	148638579	148638663	0	0	4	4	0	0	YES	NO
chr10_1_Pseudo_GGG+|+|chr10:22852579-22852651	TRP-GGG1-1	chr10	22852579	22852651	2	2	4	4	0	0	YES	YES
chr11_2_tRNALys_CTT+|+|chr11:51359900-51359972	TRK-CTT15-1	chr11	51359900	51359972	0	0	0	0	0	0	YES	NO
chr14_15_Pseudo_TAG-|-|chr14:21145178-21145259	TRL-TAG4-1	chr14	21145178	21145259	3	3	4	4	0	0	YES	NO
SNAR-A12_SNAR-A13_1|+|chr19:48410935-48411056	SNAR-A12	chr19	48410935	48411056	0	0	0	0	0	0	NO	NO
SNAR-A1_SNAR-A2_1|+|chr19:48421686-48421807	SNAR-A1	chr19	48421686	48421807	0	0	0	0	0	0	NO	NO
SNAR-A12_SNAR-A13_2|+|chr19:48448179-48448300	SNAR-A13	chr19	48448179	48448300	0	0	0	0	0	0	NO	NO
chrX_7_tRNAIle_GAT-|-|chrX:3756418-3756491	TRI-GAT1-1	chrX	3756418	3756491	0	0	0	0	0	0	YES	NO
chrX_6_tRNAIle_GAT-|-|chrX:3794842-3794915	TRI-GAT1-2	chrX	3794842	3794915	0	0	0	0	0	0	YES	NO
chrX_5_tRNAIle_GAT-|-|chrX:3833271-3833344	TRI-GAT1-3	chrX	3833271	3833344	0	0	0	0	0	0	YES	NO
chrY_1_Pseudo_TTG-|-|chrY:8240140-8240214	NMTRQ-TTG8-1	chrY	8240140	8240214	0	0	0	0	0	0	YES	NO
chr7_3_tRNAArg_CCT+|+|chr7:139025446-139025518	TRR-CCT4-1	chr7	139025446	139025518	3	3	11	12	0	-0.0347654	YES	NO
chr1_59_tRNAGlu_CTC+|+|chr1:249168447-249168518	TRE-CTC2-1	chr1	249168447	249168518	4	4	7	8	0	-0.0384741	YES	NO
chr17_41_tRNASer_CGA-|-|chr17:8042199-8042280	TRS-CGA1-1	chr17	8042199	8042280	4	4	7	8	0	-0.0384741	YES	NO
chr1_92_Pseudo_GAA-|-|chr1:149672905-149672976	TRF-GAA10-1	chr1	149672905	149672976	7	7	4	6	0	-0.0824622	YES	NO
chr6_128_tRNAGly_GCC-|-|chr6:27870686-27870756	TRG-GCC2-3	chr6	27870686	27870756	3	3	4	6	0	-0.0824622	YES	NO
chr1_117_tRNAGly_TCC-|-|chr1:145397864-145397935	TRG-TCC2-1	chr1	145397864	145397935	4	4	2	4	0	-0.0874628	YES	NO
chr6_55_tRNAIle_TAT_I+|+|chr6:27599200-27599293	TRI-TAT2-3	chr6	27599200	27599293	4	4	2	4	0	-0.0874628	YES	NO
chr1_12_tRNAAsn_GTT+|+|chr1:144481840-144481913	TRN-GTT14-1	chr1	144481840	144481913	0	0	0	2	0	-0.0931094	YES	NO
chr1_38_tRNALeu_CAG+|+|chr1:161426122-161426204	TRL-CAG1-3	chr1	161426122	161426204	3	3	0	2	0	-0.0931094	YES	NO
chr6_153_tRNAIle_AAT-|-|chr6:27242990-27243063	TRI-AAT3-1	chr6	27242990	27243063	5	5	0	2	0	-0.0931094	YES	YES
chr6_37_tRNAVal_AAC+|+|chr6:27203288-27203360	TRV-AAC5-1	chr6	27203288	27203360	25	25	11	14	0	-0.10188	YES	NO
chr1_28_tRNAGln_CTG+|+|chr1:149186125-149186196	TRQ-CTG4-2	chr1	149186125	149186196	5	5	7	10	0	-0.112475	YES	YES
chr7_15_tRNACys_GCA+|+|chr7:149404760-149404831	TRC-GCA9-4	chr7	149404760	149404831	4	4	7	10	0	-0.112475	YES	YES
chr12_8_tRNAAla_TGC+|+|chr12:125424512-125424583	TRA-TGC4-1	chr12	125424512	125424583	4	4	4	8	0	-0.160465	YES	NO
chr1_87_tRNAAla_AGC-|-|chr1:150017382-150017452	TRA-AGC20-1	chr1	150017382	150017452	14	14	11	16	0	-0.16601	YES	YES
chr10_5_Pseudo_CTG-|-|chr10:20036608-20036682	NMTRQ-CTG1-1	chr10	20036608	20036682	2	2	2	6	0	-0.169925	YES	NO
chr3_4_tRNAHis_GTG-|-|chr3:148316563-148316634	TRH-GTG3-1	chr3	148316563	148316634	2	2	0	4	0	-0.180572	YES	NO
chr12_1_tRNALys_TTT+|+|chr12:27843306-27843378	TRK-TTT11-1	chr12	27843306	27843378	12	12	7	12	0	-0.182864	YES	NO
chr14_23_tRNAPro_AGG-|-|chr14:21077495-21077566	TRP-AGG2-5	chr14	21077495	21077566	3	3	4	10	0	-0.234465	YES	NO
U6-7|+|chr14:32671250-32671356	RNU6-7	chr14	32671250	32671356	4	4	2	8	0	-0.247928	YES	NO
chr16_3_tRNAPro_TGG+|+|chr16:3208923-3208994	TRP-TGG3-3	chr16	3208923	3208994	6	6	2	8	0	-0.247928	YES	NO
chr1_109_Pseudo_GTT-|-|chr1:147851060-147851133	TRN-GTT23-1	chr1	147851060	147851133	2	2	0	6	0	-0.263034	YES	NO
chr6_22_tRNAAla_AGC+|+|chr6:26705606-26705678	TRA-AGC13-1	chr6	26705606	26705678	5	5	9	18	0	-0.29956	YES	YES
LNX1_Intronic(Alu_FLAM_C)|-|chr4:54345254-54345404	N/A	chr4	54345254	54345404	10	10	4	12	0	-0.304855	YES	NO
chr11_17_tRNAVal_TAC-|-|chr11:59318102-59318174	TRV-TAC1-1	chr11	59318102	59318174	3	3	4	12	0	-0.304855	YES	NO
chr17_34_tRNAIle_AAT-|-|chr17:8130309-8130382	TRI-AAT4-1	chr17	8130309	8130382	9	9	4	12	0	-0.304855	NO	NO
chr6_80_tRNAIle_AAT+|+|chr6:58149254-58149327	TRI-AAT1-1	chr6	58149254	58149327	4	4	7	16	0	-0.314109	YES	YES
chr11_18_tRNAAla_TGC-|-|chr11:50233879-50233950	TRA-TGC8-1	chr11	50233879	50233950	5	5	0	8	0	-0.341037	YES	YES
chr5_10_tRNAVal_CAC-|-|chr5:180649395-180649467	TRV-CAC1-5	chr5	180649395	180649467	4	4	7	18	0	-0.375509	YES	NO
chr12_9_Pseudo_AAT+|+|chr12:129716198-129716272	TRI-AAT11-1	chr12	129716198	129716272	0	0	7	20	0	-0.434403	YES	NO
chr2_14_tRNATyr_ATA_I+|+|chr2:219110549-219110641	TRY-ATA1-1	chr2	219110549	219110641	21	21	2	16	0	-0.523562	YES	NO
chr6_98_tRNALeu_AAG-|-|chr6:28911399-28911480	TRL-AAG2-2	chr6	28911399	28911480	7	7	9	28	0	-0.572579	YES	NO
RN5S_12|+|chr3:181540492-181540892	RN5S@	chr3	181540492	181540892	47	48	40	18	-0.0186157	0.544321	YES	YES
GABRB1_Intronic(AluSp)|+|chr4:47121394-47121819	N/A	chr4	47121394	47121819	39	40	35	14	-0.0207586	0.562936	YES	YES
AluY_SINE_74760232|-|chr11:75082304-75082584	N/A	chr11	75082304	75082584	36	37	16	26	-0.0216951	-0.283793	YES	YES
AluJb_SINE_Alu_17863453|+|chr17:17863509-17863951	N/A	chr17	17863509	17863951	35	36	21	14	-0.0220263	0.212994	YES	YES
chr1_55_tRNALys_TTT+|+|chr1:205443271-205443343	TRK-TTT8-1	chr1	205443271	205443343	34	35	2	14	-0.0223678	-0.459432	YES	NO
chr12_7_tRNAAsp_GTC+|+|chr12:122860924-122860994	TRD-GTC8-1	chr12	122860924	122860994	32	33	14	12	-0.0230836	0.0671142	NO	NO
TOM1L2_Intronic|-|chr17:17863453-17863740	N/A	chr17	17863453	17863740	28	29	11	6	-0.0246621	0.187627	YES	NO
chr17_9_tRNAIle_AAT+|+|chr17:8090911-8090984	TRI-AAT5-5	chr17	8090911	8090984	23	24	44	61	-0.026967	-0.298341	YES	YES
chr6_32_tRNAVal_CAC+|+|chr6:27118022-27118094	TRV-CAC9-1	chr6	27118022	27118094	20	21	7	14	-0.0285692	-0.249978	YES	NO
chr18_3_Pseudo_TCC+|+|chr18:55346177-55346248	TRG-TCC6-1	chr18	55346177	55346248	17	18	7	4	-0.0303736	0.121991	YES	NO
chr2_4_tRNALeu_AAG+|+|chr2:30277568-30277640	TRL-AAG5-1	chr2	30277568	30277640	17	18	0	6	-0.0303736	-0.263034	YES	NO
chr6_51_tRNASer_TGA+|+|chr6:27513468-27513549	TRS-TGA2-1	chr6	27513468	27513549	14	15	28	14	-0.0324215	0.398549	YES	NO
VTRNA1-2|+|chr5:140098510-140098598	VTRNA1-2	chr5	140098510	140098598	14	15	7	6	-0.0324215	0.0395284	NO	NO
chr16_21_tRNAGln_CTG+|+|chr16:71724890-71724963	TRQ-CTG18-1	chr16	71724890	71724963	14	15	11	12	-0.0324215	-0.0347654	YES	YES
chr6_135_tRNAThr_AGT-|-|chr6:27652474-27652547	TRT-AGT2-2	chr6	27652474	27652547	13	14	7	8	-0.0331669	-0.0384741	YES	YES
chr2_16_Pseudo_TTT-|-|chr2:224186315-224186387	TRK-TTT15-1	chr2	224186315	224186387	12	13	9	4	-0.0339473	0.197939	YES	NO
chr20_5_Pseudo_AAT-|-|chr20:51218338-51218415	TRI-AAT12-1	chr20	51218338	51218415	11	12	23	14	-0.0347654	0.268489	NO	NO
chr14_17_tRNATyr_GTA_I-|-|chr14:21128117-21128210	TRY-GTA7-1	chr14	21128117	21128210	10	11	2	8	-0.0356239	-0.247928	YES	NO
chr17_40_tRNAThr_AGT-|-|chr17:8042770-8042843	TRT-AGT5-1	chr17	8042770	8042843	9	10	23	12	-0.0365259	0.335603	YES	YES
chr1_9_tRNAArg_TCT_I+|+|chr1:94313129-94313213	TRR-TCT1-1	chr1	94313129	94313213	9	10	4	2	-0.0365259	0.0874628	YES	NO
chr16_32_tRNALys_CTT-|-|chr16:3207406-3207478	TRK-CTT3-1	chr16	3207406	3207478	9	10	2	8	-0.0365259	-0.247928	YES	NO
hY4_RNA|+|chr7:148660406-148660499	RNY4	chr7	148660406	148660499	8	9	14	2	-0.0374747	0.459432	YES	NO
chr6_62_tRNASer_GCT+|+|chr6:28180815-28180896	TRS-GCT5-1	chr6	28180815	28180896	8	9	18	8	-0.0374747	0.337035	YES	NO
chr2_8_Pseudo_AGG+|+|chr2:87339573-87339644	TRP-AGG4-1	chr2	87339573	87339644	8	9	4	4	-0.0374747	0	YES	NO
chr2_23_tRNAGln_TTG-|-|chr2:117782509-117782580	NMTRQ-TTG3-1	chr2	117782509	117782580	8	9	7	14	-0.0374747	-0.249978	NO	NO
chr6_132_tRNAVal_AAC-|-|chr6:27721179-27721251	TRV-AAC1-5	chr6	27721179	27721251	7	8	14	6	-0.0384741	0.289507	YES	NO
chr2_11_Pseudo_TTG+|+|chr2:132143133-132143204	NMTRQ-TTG9-1	chr2	132143133	132143204	7	8	18	18	-0.0384741	0	YES	NO
chr4_2_tRNALeu_TAA-|-|chr4:156384978-156385052	NMTRL-TAA1-1	chr4	156384978	156385052	7	8	4	8	-0.0384741	-0.160465	YES	NO
chr6_64_tRNAGln_TTG+|+|chr6:28557156-28557227	TRQ-TTG2-1	chr6	28557156	28557227	7	8	4	8	-0.0384741	-0.160465	YES	NO
chr5_4_tRNAVal_AAC+|+|chr5:180591154-180591226	TRV-AAC1-2	chr5	180591154	180591226	7	8	2	6	-0.0384741	-0.169925	YES	NO
chr16_2_tRNAArg_CCT+|+|chr16:3202901-3202973	TRR-CCT3-1	chr16	3202901	3202973	6	7	11	6	-0.0395284	0.187627	YES	NO
chr17_7_tRNASer_GCT+|+|chr17:8090184-8090265	TRS-GCT4-3	chr17	8090184	8090265	5	6	11	4	-0.040642	0.270089	YES	NO
chr7_4_Pseudo_TTG+|+|chr7:141503357-141503428	NMTRQ-TTG2-1	chr7	141503357	141503428	5	6	18	12	-0.040642	0.192645	NO	NO
chr13_2_Pseudo_CTC-|-|chr13:58458550-58458621	TRE-CTC4-1	chr13	58458550	58458621	5	6	7	4	-0.040642	0.121991	YES	NO
chr3_9_Pseudo_TTG-|-|chr3:106620878-106620949	NMTRQ-TTG4-1	chr3	106620878	106620949	5	6	11	8	-0.040642	0.109624	YES	NO
chr16_17_tRNALeu_CAG+|+|chr16:57333863-57333945	TRL-CAG2-1	chr16	57333863	57333945	5	6	11	8	-0.040642	0.109624	YES	NO
chr6_3_tRNAArg_TCG+|+|chr6:26299905-26299977	TRR-TCG4-1	chr6	26299905	26299977	5	6	7	6	-0.040642	0.0395284	YES	YES
chr6_1_tRNAGln_CTG+|+|chr6:18836402-18836473	TRQ-CTG1-1	chr6	18836402	18836473	5	6	2	6	-0.040642	-0.169925	YES	YES
chr17_21_tRNAArg_CCT-|-|chr17:73030526-73030598	TRR-CCT2-1	chr17	73030526	73030598	5	6	9	14	-0.040642	-0.174029	YES	NO
chr1_52_tRNAPro_CGG+|+|chr1:167683962-167684033	TRP-CGG1-1	chr1	167683962	167684033	5	6	9	20	-0.040642	-0.358454	YES	NO
chr1_27_Pseudo_CTG+|+|chr1:149079364-149079435	TRQ-CTG11-1	chr1	149079364	149079435	5	6	4	14	-0.040642	-0.371969	YES	YES
chr3_7_tRNACys_GCA-|-|chr3:131947944-131948015	TRC-GCA6-1	chr3	131947944	131948015	4	5	11	0	-0.0418202	0.450661	YES	YES
chr1_29_tRNAGlu_CTC+|+|chr1:149334272-149334340	TRE-CTC17-1	chr1	149334272	149334340	4	5	16	6	-0.0418202	0.353637	YES	YES
chr6_43_tRNASer_GCT+|+|chr6:27265775-27265856	TRS-GCT2-1	chr6	27265775	27265856	4	5	9	2	-0.0418202	0.285402	YES	NO
chr14_6_tRNAPro_TGG+|+|chr14:21152175-21152246	TRP-TGG3-2	chr14	21152175	21152246	4	5	7	2	-0.0418202	0.209453	YES	NO
chr5_23_Pseudo_TTG-|-|chr5:77318776-77318848	TRQ-TTG7-1	chr5	77318776	77318848	4	5	7	4	-0.0418202	0.121991	YES	NO
chr1_22_tRNAGln_CTG+|+|chr1:147800937-147801008	TRQ-CTG7-1	chr1	147800937	147801008	4	5	7	10	-0.0418202	-0.112475	YES	NO
chr6_30_tRNAPro_CGG+|+|chr6:27059521-27059592	TRP-CGG2-1	chr6	27059521	27059592	4	5	2	6	-0.0418202	-0.169925	YES	NO
chr1_86_tRNAArg_TCT-|-|chr1:159111401-159111474	TRR-TCT4-1	chr1	159111401	159111474	3	4	9	4	-0.0430687	0.197939	YES	NO
RN5S_5|-|chr1:228768375-228768496	RN5S1@	chr1	228768375	228768496	3	4	3	0	-0.0430687	0.137504	YES	YES
chr12_10_tRNAAsp_GTC-|-|chr12:125424193-125424264	TRD-GTC2-10	chr12	125424193	125424264	3	4	4	6	-0.0430687	-0.0824622	YES	NO
chr1_31_tRNAGlu_TTC+|+|chr1:149719802-149719870	TRE-TTC16-1	chr1	149719802	149719870	3	4	4	8	-0.0430687	-0.160465	YES	YES
chr6_157_tRNAVal_CAC-|-|chr6:27173867-27173939	TRV-CAC6-1	chr6	27173867	27173939	3	4	4	8	-0.0430687	-0.160465	YES	NO
chr7_12_tRNASer_AGA+|+|chr7:149305467-149305538	TRS-AGA5-1	chr7	149305467	149305538	3	4	2	6	-0.0430687	-0.169925	YES	YES
chr2_10_Pseudo_TGA+|+|chr2:132140142-132140211	NMTRS-TGA2-1	chr2	132140142	132140211	2	3	9	0	-0.0443941	0.378512	YES	NO
chr6_92_tRNAMet_CAT-|-|chr6:58168492-58168564	TRM-CAT7-1	chr6	58168492	58168564	2	3	14	4	-0.0443941	0.371969	YES	NO
chr16_11_tRNAPro_AGG+|+|chr16:3241989-3242060	TRP-AGG1-1	chr16	3241989	3242060	34	36	14	4	-0.0443941	0.371969	YES	NO
chr13_4_tRNAGlu_CTC-|-|chr13:42030061-42030132	TRE-CTC3-1	chr13	42030061	42030132	2	3	4	0	-0.0443941	0.180572	YES	NO
chr2_21_tRNASer_TGA-|-|chr2:131033024-131033093	NMTRS-TGA1-1	chr2	131033024	131033093	2	3	7	4	-0.0443941	0.121991	YES	NO
chr2_19_tRNAGly_GCC-|-|chr2:157257659-157257729	TRG-GCC2-2	chr2	157257659	157257729	2	3	7	4	-0.0443941	0.121991	YES	NO
chr6_35_tRNASer_CGA+|+|chr6:27177628-27177709	TRS-CGA2-1	chr6	27177628	27177709	2	3	7	4	-0.0443941	0.121991	YES	NO
chr14_22_tRNAPro_AGG-|-|chr14:21081560-21081631	TRP-AGG2-6	chr14	21081560	21081631	2	3	7	4	-0.0443941	0.121991	YES	NO
VTRNA1-1|+|chr5:140090860-140090958	VTRNA1-1	chr5	140090860	140090958	2	3	4	2	-0.0443941	0.0874628	NO	NO
chr7_7_tRNACys_GCA+|+|chr7:149243631-149243702	TRC-GCA16-1	chr7	149243631	149243702	2	3	4	4	-0.0443941	0	YES	YES
chr16_34_tRNAGly_CCC-|-|chr16:686736-686806	TRG-CCC2-2	chr16	686736	686806	2	3	0	2	-0.0443941	-0.0931094	YES	NO
chr6_46_tRNASer_AGA+|+|chr6:27463593-27463674	TRS-AGA2-3	chr6	27463593	27463674	2	3	0	4	-0.0443941	-0.180572	YES	NO
chr6_79_tRNAGln_TTG+|+|chr6:37287995-37288067	TRQ-TTG10-1	chr6	37287995	37288067	2	3	4	10	-0.0443941	-0.234465	YES	YES
chr1_132_tRNAGly_CCC-|-|chr1:16872434-16872504	TRG-CCC1-1	chr1	16872434	16872504	2	3	2	8	-0.0443941	-0.247928	NO	NO
chr2_1_Pseudo_CCC+|+|chr2:11691827-11691898	TRG-CCC7-1	chr2	11691827	11691898	2	3	0	8	-0.0443941	-0.341037	YES	NO
chr6_89_tRNAAla_AGC-|-|chr6:58196623-58196695	TRA-AGC16-1	chr6	58196623	58196695	2	3	0	8	-0.0443941	-0.341037	YES	YES
chr14_4_tRNAThr_TGT+|+|chr14:21149849-21149921	TRT-TGT5-1	chr14	21149849	21149921	1	2	7	2	-0.0458037	0.209453	YES	NO
chr1_110_Pseudo_TTC-|-|chr1:147781030-147781101	TRE-TTC6-1	chr1	147781030	147781101	1	2	2	2	-0.0458037	0	YES	NO
chr1_123_tRNAAsn_GTT-|-|chr1:144308614-144308687	TRN-GTT16-2	chr1	144308614	144308687	0	1	0	0	-0.0473057	0	YES	NO
chr1_122_tRNAAsn_GTT-|-|chr1:144488843-144488916	TRN-GTT16-3	chr1	144488843	144488916	0	1	0	0	-0.0473057	0	YES	NO
chr1_30_tRNAAsn_GTT+|+|chr1:149608609-149608682	TRN-GTT16-5	chr1	149608609	149608682	0	1	0	0	-0.0473057	0	YES	NO
chr6_159_tRNAAla_AGC-|-|chr6:26796006-26796078	TRA-AGC12-2	chr6	26796006	26796078	0	1	0	0	-0.0473057	0	YES	YES
chr6_152_tRNAVal_CAC-|-|chr6:27248049-27248121	TRV-CAC2-1	chr6	27248049	27248121	0	1	4	6	-0.0473057	-0.0824622	YES	NO
chr18_1_tRNAGlu_CTC+|+|chr18:43299751-43299822	TRE-CTC6-1	chr18	43299751	43299822	29	31	4	6	-0.0480943	-0.0824622	YES	NO
chr11_7_Pseudo_CCT+|+|chr11:63661767-63661835	TRR-CCT9-1	chr11	63661767	63661835	25	27	11	18	-0.0515303	-0.22741	NO	NO
chr1_104_Pseudo_GTT-|-|chr1:149211948-149212021	TRN-GTT22-1	chr1	149211948	149212021	25	27	9	26	-0.0515303	-0.521953	YES	NO
chr6_39_Pseudo_AAT+|+|chr6:27251864-27251937	TRI-AAT10-1	chr6	27251864	27251937	16	18	9	4	-0.0614005	0.197939	YES	YES
RNaseMRP_RNA|-|chr9:35657749-35658014	RMRP	chr9	35657749	35658014	16	18	4	12	-0.0614005	-0.304855	YES	NO
chr3_2_tRNAVal_AAC+|+|chr3:169490018-169490090	TRV-AAC1-1	chr3	169490018	169490090	13	15	23	28	-0.0655883	-0.130061	YES	NO
chr6_149_tRNALys_TTT-|-|chr6:27302769-27302841	TRK-TTT6-1	chr6	27302769	27302841	12	14	11	2	-0.0671142	0.357552	YES	NO
chr17_5_tRNAGly_GCC+|+|chr17:8029064-8029134	TRG-GCC2-6	chr17	8029064	8029134	8	10	9	2	-0.0740006	0.285402	YES	NO
chr12_2_tRNASer_CGA+|+|chr12:56584148-56584229	TRS-CGA4-1	chr12	56584148	56584229	27	30	14	8	-0.0740006	0.211504	YES	NO
chr14_12_Pseudo_TTT-|-|chr14:74055529-74055601	TRK-TTT14-1	chr14	74055529	74055601	7	9	21	10	-0.0759489	0.350497	YES	NO
chr6_118_Pseudo_TTT-|-|chr6:28660987-28661060	TRK-TTT13-1	chr6	28660987	28661060	7	9	7	6	-0.0759489	0.0395284	YES	NO
chr1_64_tRNAGlu_TTC-|-|chr1:172157539-172157607	TRE-TTC12-1	chr1	172157539	172157607	7	9	2	4	-0.0759489	-0.0874628	NO	NO
SNAR-A3-A11_SNAR-A14_1|+|chr19:48427036-48427156	SNAR-A3	chr19	48427036	48427156	6	8	7	4	-0.0780025	0.121991	YES	NO
5S_rRNA-related_8|+|chr8:93179688-93179778	RN5S@	chr8	93179688	93179778	6	8	10	14	-0.0780025	-0.137504	YES	YES
chr6_146_tRNAGln_CTG-|-|chr6:27515531-27515602	TRQ-CTG2-1	chr6	27515531	27515602	5	7	16	0	-0.0801703	0.616671	YES	YES
chr11_12_tRNAPro_TGG-|-|chr11:75946869-75946940	TRP-TGG2-1	chr11	75946869	75946940	5	7	11	0	-0.0801703	0.450661	YES	NO
chr18_4_tRNALys_CTT-|-|chr18:43669271-43669343	TRK-CTT6-1	chr18	43669271	43669343	5	7	9	14	-0.0801703	-0.174029	YES	NO
chr1_13_tRNAAsn_GTT+|+|chr1:145385729-145385804	TRN-GTT20-1	chr1	145385729	145385804	5	7	4	10	-0.0801703	-0.234465	YES	NO
chr6_5_tRNASer_AGA+|+|chr6:26327817-26327898	TRS-AGA2-1	chr6	26327817	26327898	4	6	21	4	-0.0824622	0.584963	YES	NO
chr1_60_Pseudo_TAA-|-|chr1:238106956-238107030	NMTRL-TAA3-1	chr1	238106956	238107030	4	6	11	4	-0.0824622	0.270089	YES	NO
chr6_122_Pseudo_TGC-|-|chr6:28601859-28601930	TRA-TGC9-1	chr6	28601859	28601930	4	6	18	10	-0.0824622	0.263034	YES	YES
chr17_18_tRNAArg_CCT+|+|chr17:73030001-73030073	TRR-CCT1-1	chr17	73030001	73030073	4	6	7	2	-0.0824622	0.209453	YES	NO
chr2_9_Pseudo_TAA+|+|chr2:117781417-117781491	NMTRL-TAA2-1	chr2	117781417	117781491	4	6	9	4	-0.0824622	0.197939	YES	NO
chr6_75_tRNAMet_CAT+|+|chr6:28912352-28912424	TRM-CAT3-1	chr6	28912352	28912424	4	6	18	12	-0.0824622	0.192645	YES	NO
chr12_14_Pseudo_CTC-|-|chr12:114386545-114386617	TRE-CTC16-1	chr12	114386545	114386617	4	6	7	4	-0.0824622	0.121991	YES	NO
chr6_90_tRNAAla_AGC-|-|chr6:58187444-58187516	TRA-AGC17-1	chr6	58187444	58187516	4	6	7	6	-0.0824622	0.0395284	YES	YES
chr6_21_tRNAMet_CAT+|+|chr6:26701712-26701784	TRM-CAT5-1	chr6	26701712	26701784	4	6	11	10	-0.0824622	0.0356239	YES	NO
SNAR-A3-A11_SNAR-A14_8|-|chr19:50620977-50621097	SNAR-A9	chr19	50620977	50621097	4	6	5	5	-0.0824622	0	YES	NO
chr8_13_Pseudo_TAA-|-|chr8:47740038-47740112	NMTRL-TAA6-1	chr8	47740038	47740112	4	6	7	8	-0.0824622	-0.0384741	YES	NO
chr12_5_tRNAAsp_GTC+|+|chr12:98897281-98897352	TRD-GTC1-1	chr12	98897281	98897352	4	6	7	8	-0.0824622	-0.0384741	YES	NO
chr1_114_tRNAGln_CTG-|-|chr1:146476760-146476831	TRQ-CTG10-1	chr1	146476760	146476831	4	6	4	6	-0.0824622	-0.0824622	YES	YES
chr1_82_tRNAGly_TCC-|-|chr1:161409961-161410032	TRG-TCC4-1	chr1	161409961	161410032	4	6	2	6	-0.0824622	-0.169925	YES	NO
chr6_19_tRNAAla_AGC+|+|chr6:26682715-26682787	TRA-AGC12-1	chr6	26682715	26682787	4	6	4	10	-0.0824622	-0.234465	YES	YES
chr5_20_tRNALeu_CAG-|-|chr5:159392041-159392118	TRL-CAG3-1	chr5	159392041	159392118	4	6	2	8	-0.0824622	-0.247928	YES	YES
chr1_68_tRNAGly_GCC-|-|chr1:161493637-161493707	TRG-GCC2-1	chr1	161493637	161493707	4	6	2	10	-0.0824622	-0.321928	YES	NO
chr1_45_tRNAGly_TCC+|+|chr1:161500903-161500974	TRG-TCC2-6	chr1	161500903	161500974	4	6	0	12	-0.0824622	-0.485427	YES	NO
chr6_47_tRNASer_AGA+|+|chr6:27470818-27470899	TRS-AGA2-4	chr6	27470818	27470899	3	5	9	2	-0.0848889	0.285402	YES	NO
chr16_24_tRNAGly_GCC-|-|chr16:70812942-70813012	TRG-GCC2-4	chr16	70812942	70813012	3	5	2	6	-0.0848889	-0.169925	YES	NO
chr15_5_Pseudo_GTA-|-|chr15:92254302-92254374	TRY-GTA12-1	chr15	92254302	92254374	2	4	9	2	-0.0874628	0.285402	YES	NO
chr1_134_tRNAAsn_GTT-|-|chr1:16858893-16858966	TRN-GTT18-1	chr1	16858893	16858966	2	4	4	0	-0.0874628	0.180572	YES	NO
chr8_2_Pseudo_TTT+|+|chr8:18120203-18120272	TRK-TTT17-1	chr8	18120203	18120272	2	4	9	6	-0.0874628	0.115477	YES	NO
chr6_91_tRNAAla_AGC-|-|chr6:58182679-58182751	TRA-AGC12-3	chr6	58182679	58182751	2	4	2	4	-0.0874628	-0.0874628	YES	YES
chr6_42_tRNAGln_CTG+|+|chr6:27263212-27263283	TRQ-CTG5-1	chr6	27263212	27263283	2	4	0	2	-0.0874628	-0.0931094	YES	NO
chr6_143_tRNALys_TTT-|-|chr6:27559593-27559665	TRK-TTT4-1	chr6	27559593	27559665	2	4	4	10	-0.0874628	-0.234465	YES	NO
chr6_38_tRNAIle_AAT+|+|chr6:27241739-27241812	TRI-AAT9-1	chr6	27241739	27241812	2	4	9	16	-0.0874628	-0.23816	YES	YES
chr14_3_tRNAPro_TGG+|+|chr14:21101165-21101236	TRP-TGG1-1	chr14	21101165	21101236	1	3	4	0	-0.0901978	0.180572	YES	NO
chr14_11_Pseudo_CTA-|-|chr14:78700838-78700910	TR*-CTA3-1	chr14	78700838	78700910	1	3	7	4	-0.0901978	0.121991	YES	NO
chr1_128_Pseudo_CTG-|-|chr1:17180900-17180971	TRQ-CTG14-1	chr1	17180900	17180971	1	3	2	2	-0.0901978	0	YES	YES
chr1_91_Pseudo_CCC-|-|chr1:149680210-149680280	TRG-CCC6-1	chr1	149680210	149680280	1	3	4	4	-0.0901978	0	YES	NO
chr1_130_tRNAGly_CCC-|-|chr1:17004766-17004836	TRG-CCC4-1	chr1	17004766	17004836	1	3	4	6	-0.0901978	-0.0824622	NO	NO
chr7_23_tRNACys_GCA-|-|chr7:149072850-149072921	TRC-GCA18-1	chr7	149072850	149072921	1	3	0	2	-0.0901978	-0.0931094	YES	YES
chr16_6_tRNAPro_CGG+|+|chr16:3222049-3222120	TRP-CGG1-2	chr16	3222049	3222120	1	3	4	10	-0.0901978	-0.234465	YES	NO
chr1_69_tRNAAsp_GTC-|-|chr1:161440205-161440276	TRD-GTC2-5	chr1	161440205	161440276	0	2	0	0	-0.0931094	0	YES	NO
SNAR-A1_SNAR-A2_2|+|chr19:48437438-48437559	SNAR-A2	chr19	48437438	48437559	0	2	0	0	-0.0931094	0	NO	NO
chr1_3_Pseudo_CAC+|+|chr1:17186693-17186765	TRV-CAC11-2	chr1	17186693	17186765	0	2	4	5	-0.0931094	-0.0418202	NO	NO
chr6_26_tRNAUndet_???+|+|chr6:26752630-26752703	TRU-NNN1-1	chr6	26752630	26752703	0	2	4	8	-0.0931094	-0.160465	YES	YES
chr14_21_tRNAThr_TGT-|-|chr14:21081949-21082021	TRT-TGT3-1	chr14	21081949	21082021	0	2	0	4	-0.0931094	-0.180572	NO	NO
chr6_50_tRNASer_AGA+|+|chr6:27499987-27500068	TRS-AGA3-1	chr6	27499987	27500068	0	2	0	6	-0.0931094	-0.263034	YES	NO
AluSg_SINE_Alu|+|chr19:357075-357378	N/A	chr19	357075	357378	50	56	11	8	-0.104337	0.109624	YES	YES
chr1_112_tRNAGln_CTG-|-|chr1:147737382-147737453	TRQ-CTG4-1	chr1	147737382	147737453	10	13	7	14	-0.104337	-0.249978	YES	YES
chr17_17_tRNASup_TTA+|+|chr17:58863593-58863663	TR*-TTA1-1	chr17	58863593	58863663	9	12	14	4	-0.106915	0.371969	YES	NO
chr1_61_Pseudo_TGG-|-|chr1:207178154-207178230	TRP-TGG5-1	chr1	207178154	207178230	9	12	14	8	-0.106915	0.211504	YES	YES
chr11_11_tRNALys_TTT+|+|chr11:122430655-122430727	TRK-TTT2-1	chr11	122430655	122430727	9	12	4	2	-0.106915	0.0874628	YES	NO
chr8_7_Pseudo_CTC+|+|chr8:70072340-70072414	TRE-CTC14-1	chr8	70072340	70072414	9	12	7	6	-0.106915	0.0395284	YES	NO
chr9_6_tRNAAsp_GTC-|-|chr9:77517990-77518061	TRD-GTC4-1	chr9	77517990	77518061	35	40	11	12	-0.106915	-0.0347654	YES	NO
chr17_33_Pseudo_TTG-|-|chr17:19506587-19506658	NMTRQ-TTG12-1	chr17	19506587	19506658	9	12	9	10	-0.106915	-0.0365259	YES	NO
chr1_2_tRNAGly_CCC+|+|chr1:17053780-17053850	TRG-CCC5-1	chr1	17053780	17053850	9	12	7	24	-0.106915	-0.545434	NO	NO
RN5S_3|-|chr1:228763892-228764013	RN5S1@	chr1	228763892	228764013	7	10	4	0	-0.112475	0.180572	YES	YES
chrX_3_Pseudo_CTC-|-|chrX:51306112-51306183	TRE-CTC18-1	chrX	51306112	51306183	7	10	7	10	-0.112475	-0.112475	YES	NO
chr7_2_tRNAPro_AGG+|+|chr7:128423504-128423575	TRP-AGG2-3	chr7	128423504	128423575	6	9	16	2	-0.115477	0.523562	YES	NO
chr15_1_tRNAHis_GTG+|+|chr15:45493349-45493420	TRH-GTG1-9	chr15	45493349	45493420	6	9	18	8	-0.115477	0.337035	YES	YES
chr6_136_tRNAVal_AAC-|-|chr6:27648885-27648957	TRV-AAC4-1	chr6	27648885	27648957	6	9	9	8	-0.115477	0.0374747	YES	NO
chr15_2_tRNALys_CTT+|+|chr15:79152904-79152976	TRK-CTT1-2	chr15	79152904	79152976	6	9	4	6	-0.115477	-0.0824622	YES	NO
chr17_23_tRNAArg_CCG-|-|chr17:66016013-66016085	TRR-CCG2-1	chr17	66016013	66016085	17	21	28	6	-0.117836	0.688056	YES	NO
chr6_54_tRNAThr_CGT+|+|chr6:27586135-27586208	TRT-CGT5-1	chr6	27586135	27586208	16	20	2	6	-0.120294	-0.169925	YES	NO
U6-1|-|chr15:68132276-68132383	RNU6-1	chr15	68132276	68132383	4	7	7	2	-0.121991	0.209453	YES	NO
chr1_57_Pseudo_TGG+|+|chr1:238105862-238105933	NMTRP-TGG1-1	chr1	238105862	238105933	4	7	18	14	-0.121991	0.125531	YES	NO
chr1_135_tRNAAsn_GTT-|-|chr1:16847080-16847153	TRN-GTT5-1	chr1	16847080	16847153	4	7	4	4	-0.121991	0	YES	NO
chr7_21_tRNACys_GCA-|-|chr7:149112229-149112300	TRC-GCA11-1	chr7	149112229	149112300	4	7	4	4	-0.121991	0	YES	YES
chr11_19_tRNATrp_CCA-|-|chr11:45290200-45290273	TRW-CCA7-1	chr11	45290200	45290273	4	7	9	24	-0.121991	-0.469485	YES	NO
FLAM_C_SINE_Alu|-|chr3:195871503-195871903	N/A	chr3	195871503	195871903	37	43	11	18	-0.123735	-0.22741	YES	YES
chr7_25_tRNACys_GCA-|-|chr7:149052766-149052837	TRC-GCA13-1	chr7	149052766	149052837	3	6	9	8	-0.125531	0.0374747	YES	YES
chr8_3_tRNAGlu_CTC+|+|chr8:59504798-59504868	TRE-CTC5-1	chr8	59504798	59504868	3	6	11	10	-0.125531	0.0356239	YES	NO
chr6_44_tRNASer_AGA+|+|chr6:27446591-27446672	TRS-AGA2-2	chr6	27446591	27446672	3	6	2	2	-0.125531	0	YES	NO
chr16_5_tRNALys_CTT+|+|chr16:3214939-3215011	TRK-CTT8-1	chr16	3214939	3215011	3	6	9	20	-0.125531	-0.358454	YES	NO
chr14_1_tRNALeu_AAG+|+|chr14:21078291-21078372	TRL-AAG2-3	chr14	21078291	21078372	13	17	14	8	-0.128324	0.211504	YES	NO
chr11_5_tRNALys_TTT+|+|chr11:59323902-59323974	TRK-TTT5-1	chr11	59323902	59323974	2	5	7	4	-0.129283	0.121991	YES	NO
chr7_8_tRNACys_GCA+|+|chr7:149253802-149253873	TRC-GCA22-1	chr7	149253802	149253873	2	5	2	2	-0.129283	0	YES	YES
chr8_14_Pseudo_TTG-|-|chr8:32872646-32872717	NMTRQ-TTG11-1	chr8	32872646	32872717	2	5	2	6	-0.129283	-0.169925	YES	NO
chr1_127_tRNALys_CTT-|-|chr1:55423542-55423614	TRK-CTT7-1	chr1	55423542	55423614	1	4	9	14	-0.133267	-0.174029	YES	NO
chr1_84_tRNAGlu_TTC-|-|chr1:161391883-161391954	TRE-TTC4-2	chr1	161391883	161391954	19	24	44	20	-0.140178	0.565597	YES	NO
chr3_5_tRNALeu_AAG-|-|chr3:148221228-148221309	TRL-AAG8-1	chr3	148221228	148221309	19	24	9	10	-0.140178	-0.0365259	YES	NO
chr1_6_tRNAAsn_GTT+|+|chr1:17201958-17202031	TRN-GTT13-1	chr1	17201958	17202031	9	13	23	14	-0.140863	0.268489	YES	NO
chr11_14_tRNALys_TTT-|-|chr11:59327808-59327880	TRK-TTT3-4	chr11	59327808	59327880	6	10	9	6	-0.152003	0.115477	YES	NO
chr11_16_tRNAVal_TAC-|-|chr11:59318460-59318532	TRV-TAC2-1	chr11	59318460	59318532	6	10	9	12	-0.152003	-0.106915	YES	NO
chr11_9_tRNAPro_AGG+|+|chr11:75946557-75946628	TRP-AGG2-4	chr11	75946557	75946628	5	9	9	0	-0.156119	0.378512	YES	NO
chrX_2_tRNALeu_TAA-|-|chrX:55207755-55207829	NMTRL-TAA4-1	chrX	55207755	55207829	5	9	11	6	-0.156119	0.187627	YES	NO
chr1_23_Pseudo_CTG+|+|chr1:147825689-147825760	TRQ-CTG9-1	chr1	147825689	147825760	5	9	7	4	-0.156119	0.121991	YES	YES
chr20_6_tRNALeu_AAG-|-|chr20:48952342-48952423	TRL-AAG6-1	chr20	48952342	48952423	30	37	23	12	-0.159199	0.335603	YES	NO
chr7_22_tRNACys_GCA-|-|chr7:149074601-149074672	TRC-GCA10-1	chr7	149074601	149074672	4	8	16	8	-0.160465	0.275634	YES	YES
chr1_97_tRNAAsn_GTT-|-|chr1:149326272-149326345	TRN-GTT12-1	chr1	149326272	149326345	4	8	8	6	-0.160465	0.0780025	YES	NO
MER50_LTR_ERV1|+|chr1:160895487-160895761	N/A	chr1	160895487	160895761	4	8	7	8	-0.160465	-0.0384741	YES	YES
chr5_5_tRNAVal_AAC+|+|chr5:180596610-180596682	TRV-AAC1-3	chr5	180596610	180596682	4	8	7	8	-0.160465	-0.0384741	YES	NO
RNU6ATAC|-|chr9:137029561-137029686	RNU6ATAC	chr9	137029561	137029686	12	17	21	8	-0.162271	0.424498	YES	NO
OTHER1_RP3TR1|-|chr11:35548169-35548261	N/A	chr11	35548169	35548261	2	6	9	4	-0.169925	0.197939	NO	NO
chr7_13_tRNACys_GCA+|+|chr7:149332778-149332849	TRC-GCA9-3	chr7	149332778	149332849	2	6	4	0	-0.169925	0.180572	YES	YES
chr6_60_tRNAThr_AGT+|+|chr6:27694473-27694546	TRT-AGT4-1	chr6	27694473	27694546	2	6	9	10	-0.169925	-0.0365259	YES	YES
chr16_18_tRNAGly_GCC+|+|chr16:70822597-70822667	TRG-GCC5-1	chr16	70822597	70822667	2	6	7	8	-0.169925	-0.0384741	YES	NO
chr7_20_tRNACys_GCA-|-|chr7:149286164-149286235	TRC-GCA3-1	chr7	149286164	149286235	2	6	2	14	-0.169925	-0.459432	YES	YES
tRNA-derived|-|chr11:68227589-68227681	N/A	chr11	68227589	68227681	9	14	16	4	-0.174029	0.436099	YES	YES
chr6_97_tRNAMet_CAT-|-|chr6:28921042-28921114	TRM-CAT3-2	chr6	28921042	28921114	0	4	2	10	-0.180572	-0.321928	YES	NO
chr14_16_tRNATyr_GTA_I-|-|chr14:21131351-21131444	TRY-GTA5-4	chr14	21131351	21131444	6	11	11	8	-0.187627	0.109624	YES	NO
chr1_93_tRNAAsn_GTT-|-|chr1:149670057-149670130	TRN-GTT19-1	chr1	149670057	149670130	5	10	7	4	-0.192645	0.121991	YES	NO
chr20_3_Pseudo_CAC+|+|chr20:43951001-43951073	TRV-CAC14-1	chr20	43951001	43951073	25	33	11	4	-0.19592	0.270089	YES	NO
chr19_6_tRNALys_CTT-|-|chr19:52425396-52425468	TRK-CTT11-1	chr19	52425396	52425468	4	9	9	10	-0.197939	-0.0365259	YES	NO
chr2_26_Pseudo_???-|-|chr2:70663957-70664027	TRU-NNN9-1	chr2	70663957	70664027	4	9	4	8	-0.197939	-0.160465	YES	NO
chr7_5_tRNACys_GCA+|+|chr7:149007281-149007352	TRC-GCA1-1	chr7	149007281	149007352	4	9	9	16	-0.197939	-0.23816	YES	YES
chr2_22_Pseudo_TTG-|-|chr2:131029911-131029982	NMTRQ-TTG7-1	chr2	131029911	131029982	4	9	7	14	-0.197939	-0.249978	YES	NO
chr16_10_tRNALys_CTT+|+|chr16:3241501-3241573	TRK-CTT4-1	chr16	3241501	3241573	4	9	0	10	-0.197939	-0.415037	YES	NO
chr20_2_Pseudo_AGA+|+|chr20:30088703-30088774	TRS-AGA7-1	chr20	30088703	30088774	30	39	9	8	-0.201634	0.0374747	NO	NO
chr10_4_tRNAAsn_GTT-|-|chr10:22518438-22518511	TRN-GTT2-3	chr10	22518438	22518511	3	8	9	2	-0.203533	0.285402	YES	NO
chr19_12_Pseudo_TTG-|-|chr19:9150356-9150428	TRQ-TTG8-1	chr19	9150356	9150428	3	8	9	8	-0.203533	0.0374747	NO	NO
chr16_23_tRNALys_TTT-|-|chr16:73512216-73512288	TRK-TTT1-1	chr16	73512216	73512288	16	23	7	12	-0.204358	-0.182864	YES	NO
chr6_117_tRNAAla_CGC-|-|chr6:28663709-28663780	TRA-CGC5-1	chr6	28663709	28663780	9	15	21	6	-0.206451	0.5025	YES	YES
chr1_103_tRNAAsn_GTT-|-|chr1:149230570-149230643	TRN-GTT6-1	chr1	149230570	149230643	2	7	7	8	-0.209453	-0.0384741	YES	NO
chr6_45_tRNAAsp_GTC+|+|chr6:27447453-27447524	TRD-GTC2-6	chr6	27447453	27447524	1	6	7	6	-0.215729	0.0395284	YES	NO
chr16_12_tRNAArg_CCT+|+|chr16:3243918-3243990	TRR-CCT5-1	chr16	3243918	3243990	7	13	7	8	-0.216811	-0.0384741	YES	NO
chr19_2_tRNAGly_TCC+|+|chr19:4724082-4724153	TRG-TCC1-1	chr19	4724082	4724153	19	27	16	18	-0.21818	-0.0614005	YES	NO
AluSx_SINE_Alu_50595434|+|chr10:50595434-50595544	N/A	chr10	50595434	50595544	37	48	14	26	-0.219313	-0.347923	YES	YES
chr16_14_tRNAGln_TTG+|+|chr16:3419813-3419884	NMTRQ-TTG5-1	chr16	3419813	3419884	6	12	16	6	-0.222392	0.353637	YES	NO
chr6_85_Pseudo_TTC-|-|chr6:163210014-163210082	TRE-TTC15-1	chr6	163210014	163210082	0	5	11	10	-0.222392	0.0356239	YES	NO
U6-2|+|chr19:1021520-1021627	RNU6-2	chr19	1021520	1021627	6	12	4	6	-0.222392	-0.0824622	YES	NO
chr6_111_Pseudo_AGC-|-|chr6:28746544-28746615	TRA-AGC23-1	chr6	28746544	28746615	0	5	2	6	-0.222392	-0.169925	NO	NO
U6-9|+|chr19:893483-893590	RNU6-9	chr19	893483	893590	23	32	2	10	-0.226276	-0.321928	YES	NO
chr15_6_Pseudo_CTT-|-|chr15:76674765-76674838	TRK-CTT16-1	chr15	76674765	76674838	11	18	11	6	-0.22741	0.187627	YES	NO
chr21_2_tRNAGly_GCC-|-|chr21:18827107-18827177	TRG-GCC1-5	chr21	18827107	18827177	15	23	2	12	-0.236067	-0.392317	YES	NO
chr6_78_tRNALeu_AAG+|+|chr6:28956779-28956860	TRL-AAG3-1	chr6	28956779	28956860	9	16	9	0	-0.23816	0.378512	YES	NO
chr4_3_tRNACys_GCA-|-|chr4:124430005-124430076	TRC-GCA2-1	chr4	124430005	124430076	25	35	7	16	-0.241008	-0.314109	YES	YES
chr5_8_tRNAAla_TGC+|+|chr5:180633868-180633939	TRA-TGC3-1	chr5	180633868	180633939	13	21	18	8	-0.246161	0.337035	YES	YES
chr9_5_tRNAGln_CTG-|-|chr9:126655522-126655594	TRQ-CTG15-1	chr9	126655522	126655594	2	8	9	8	-0.247928	0.0374747	YES	NO
chr6_145_tRNASer_AGA-|-|chr6:27521192-27521273	TRS-AGA4-1	chr6	27521192	27521273	2	8	4	6	-0.247928	-0.0824622	YES	NO
chr6_40_tRNAVal_TAC+|+|chr6:27258405-27258477	TRV-TAC4-1	chr6	27258405	27258477	7	14	9	8	-0.249978	0.0374747	YES	NO
OTHER2_RP3TR2|+|chr1:147775601-147775693	N/A	chr1	147775601	147775693	14	23	4	18	-0.268489	-0.4975	NO	NO
chr16_30_tRNALys_CTT-|-|chr16:3230555-3230627	TRK-CTT5-1	chr16	3230555	3230627	9	17	14	8	-0.269187	0.211504	YES	NO
chr14_14_tRNAGlu_TTC-|-|chr14:32236816-32236886	TRE-TTC11-1	chr14	32236816	32236886	17	27	18	2	-0.278301	0.584963	YES	NO
chr6_137_tRNASer_CGA-|-|chr6:27640229-27640310	TRS-CGA3-1	chr6	27640229	27640310	2	9	4	12	-0.285402	-0.304855	YES	NO
chr9_8_tRNAGln_TTG-|-|chr9:5095085-5095156	NMTRQ-TTG14-1	chr9	5095085	5095156	6	14	16	10	-0.289507	0.201634	YES	NO
chr1_85_tRNAVal_CAC-|-|chr1:161369490-161369562	TRV-CAC1-1	chr1	161369490	161369562	6	14	18	12	-0.289507	0.192645	YES	NO
chr6_87_tRNAGlu_CTC-|-|chr6:126101393-126101464	TRE-CTC1-7	chr6	126101393	126101464	6	14	4	18	-0.289507	-0.4975	YES	NO
chr3_12_Pseudo_GCA-|-|chr3:17741392-17741464	TRC-GCA25-1	chr3	17741392	17741464	0	7	11	18	-0.302563	-0.22741	YES	YES
chr6_100_tRNALeu_CAA_I-|-|chr6:28864000-28864105	TRL-CAA1-1	chr6	28864000	28864105	17	28	14	20	-0.303392	-0.184425	YES	NO
chr1_96_Pseudo_CCT-|-|chr1:149343081-149343151	TRR-CCT7-1	chr1	149343081	149343151	4	12	2	4	-0.304855	-0.0874628	YES	NO
chr16_8_tRNAPro_TGG+|+|chr16:3238094-3238165	TRP-TGG3-5	chr16	3238094	3238165	3	12	0	8	-0.347923	-0.341037	YES	NO
chr1_54_tRNALys_TTT+|+|chr1:204475655-204475727	TRK-TTT3-1	chr1	204475655	204475727	12	24	16	6	-0.36257	0.353637	YES	NO
chr1_63_tRNAVal_AAC-|-|chr1:180184276-180184348	TRV-AAC7-1	chr1	180184276	180184348	9	21	7	0	-0.387023	0.302563	YES	NO
chr14_9_tRNAAla_AGC+|+|chr14:89445442-89445514	TRA-AGC15-1	chr14	89445442	89445514	2	12	18	14	-0.392317	0.125531	YES	YES
chr1_90_tRNAVal_CAC-|-|chr1:149684088-149684161	TRV-CAC5-1	chr1	149684088	149684161	9	22	11	26	-0.415037	-0.449803	YES	NO
chr19_9_Pseudo_TTT-|-|chr19:41748142-41748214	TRK-TTT10-1	chr19	41748142	41748214	48	76	37	67	-0.442518	-0.533824	YES	NO
chr19_5_tRNALys_CTT+|+|chr19:36066750-36066822	TRK-CTT10-1	chr19	36066750	36066822	192	285	233	165	-0.504792	0.431589	YES	NO
chr17_10_tRNAGly_TCC+|+|chr17:8124866-8124937	TRG-TCC3-1	chr17	8124866	8124937	66	120	197	102	-0.643856	0.782154	YES	NO
chr17_31_tRNAAsn_GTT-|-|chr17:36908034-36908107	TRN-GTT2-5	chr17	36908034	36908107	11	35	9	14	-0.664816	-0.174029	YES	NO
chr1_116_tRNAGlu_CTC-|-|chr1:145399233-145399304	TRE-CTC1-1	chr1	145399233	145399304	10	63	30	42	-1.21723	-0.263034	YES	NO

## Sheet: DamIP-seq (Other loci, FBS)
Feature Position	Feature	BIN name	MAF1 DamIP-seq score	Peak position
Pol II genes
chr1:17081400-17090975	NR_002729|MST1P9|-	BIN_809	0.431567	chr1:17084400-17084800
chr2:238875586-239008054	NR_037904|UBE2F-SCLY|+	BIN_4568	0.448236	chr2:239002000-239002400
chr3:51705221-51738339	NR_024012|TEX264|+	BIN_5255	0.448236	chr3:51718000-51718400
chr5:153769328-153825382	NR_037897|FLJ38109|-	BIN_5875	0.424214	chr5:153780400-153780800
chr5:176946789-176981548	NR_024019|FAM193B|-	BIN_5947	0.459804	chr5:176950800-176951200
chr7:102389398-102449672	NR_026879|FAM185A|+	BIN_6596	0.424214	chr7:102398800-102399200
chr8:128806778-129113499	NR_003367|PVT1|+	BIN_7094	0.436925	chr8:128970000-128970400
chr10:696016-711109	NR_027152|C10orf108|+	BIN_261	0.431567	chr10:704000-704400
chr11:69931515-70035652	NR_030691|ANO1|+	BIN_798	0.426395	chr11:69979200-69979600
chr13:36048405-36515382	NR_031646|MIR548F5|-	BIN_1713	0.435569	chr13:36397200-36397600
chr17:21904061-21913070	NR_027084|FLJ36000|+	BIN_2824	0.509026	chr17:21904000-21904400
chr17:21904061-21913070	NR_027084|FLJ36000|+	BIN_2825	0.419211	chr17:21906000-21906400
chr19:43341148-43359870	NR_026824|PSG10P|-	BIN_3607	0.428265	chr19:43360000-43360400
chr20:52491039-52492248	NR_002189|SUMO1P1|-	BIN_3953	0.416567	chr20:52490800-52491200
chr20:62289162-62330051	NR_037882|RTEL1-TNFRSF6B|+	BIN_4009	0.434412	chr20:62310400-62310800
chr21:45225638-45232448	NR_026961|LOC284837|-	BIN_4205	0.47041	chr21:45230800-45231200
chr1:2252692-2356219	MORN1|-	BIN_1283	0.464751	chr1:2307200-2307600
chr1:2567415-2706280	TTC34|-	BIN_1488	0.475725	chr1:2614400-2614800
chr1:2567415-2706280	TTC34|-	BIN_1491	0.475246	chr1:2620800-2621200
chr1:2567415-2706280	TTC34|-	BIN_1494	0.428704	chr1:2628800-2629200
chr1:2567415-2706280	TTC34|-	BIN_1516	0.490289	chr1:2688000-2688400
chr1:2567415-2706280	TTC34|-	BIN_1517	0.431567	chr1:2689200-2689600
chr1:26158414-26185903	C1orf135|-	BIN_1489	0.442477	chr1:26161200-26161600
chr1:35734568-35887659	ZMYM4|+	BIN_1763	0.426395	chr1:35848400-35848800
chr1:38179552-38230805	EPHA10|-	BIN_1801	0.454089	chr1:38186000-38186400
chr1:41492872-41707826	SCMH1|-	BIN_1876	0.418849	chr1:41664400-41664800
chr1:43886428-43918321	KIAA0467|+	BIN_1945	0.442477	chr1:43915200-43915600
chr1:47223510-47285085	CYP4B1|+	BIN_2044	0.424214	chr1:47282400-47282800
chr1:109834987-109849663	MYBPHL|-	BIN_391	0.429784	chr1:109837600-109838000
chr1:153516089-153522612	S100A4|-	BIN_649	0.429784	chr1:153516000-153516400
chr1:156549519-156556562	TTC24|+	BIN_687	0.413678	chr1:156556400-156556800
chr1:168250278-168283664	TBX19|+	BIN_788	0.540816	chr1:168253200-168253600
chr1:175291935-175712906	TNR|-	BIN_848	0.418849	chr1:175310000-175310400
chr1:205012325-205047627	CNTN2|+	BIN_988	0.443237	chr1:205020400-205020800
chr1:228327663-228336685	GUK1|+	BIN_1267	0.436925	chr1:228334800-228335200
chr1:228395831-228566575	OBSCN|+	BIN_1269	0.413678	chr1:228456400-228456800
chr1:231041989-231114621	TTC13|-	BIN_7984	0.418849	chr1:231088400-231088800
chr2:1792885-2335032	MYT1L|-	BIN_4490	0.59667	chr2:2313200-2313600
chr2:26804070-26864236	CIB4|-	BIN_4684	0.471864	chr2:26832000-26832400
chr2:33172039-33624576	LTBP1|+	BIN_4713	0.459804	chr2:33435200-33435600
chr2:47272677-47403740	CALM2|-	BIN_4753	0.425492	chr2:47312000-47312400
chr2:86730554-86948245	VPS24|-	BIN_4854	0.498104	chr2:86861600-86862000
chr2:133174147-133404132	GPR39|+	BIN_4140	0.541548	chr2:133250400-133250800
chr2:242523820-242576864	THAP4|-	BIN_4622	0.417052	chr2:242559200-242559600
chr2:242523820-242576864	THAP4|-	BIN_4623	0.562513	chr2:242559600-242560000
chr3:38589548-38691164	SCN5A|-	BIN_5189	0.442477	chr3:38648800-38649200
chr3:48445261-48471594	PLXNB1|-	BIN_5228	0.424214	chr3:48451600-48452000
chr3:48445261-48471594	PLXNB1|-	BIN_5229	0.413678	chr3:48466800-48467200
chr3:49133365-49142553	QARS|-	BIN_5236	0.454089	chr3:49137200-49137600
chr3:49591922-49708978	BSN|+	BIN_5242	0.454212	chr3:49602000-49602400
chr3:129274018-129325661	PLXND1|-	BIN_4964	0.471864	chr3:129284000-129284400
chr3:135969148-136056738	PCCB|+	BIN_4978	0.583949	chr3:136018000-136018400
chr3:158680024-159615155	IQCJ-SCHIP1|+	BIN_5046	0.428265	chr3:159401200-159401600
chr4:843064-926161	GAK|-	BIN_5685	0.465725	chr4:864000-864400
chr4:183065140-183724177	ODZ3|+	BIN_5501	0.418849	chr4:183292400-183292800
chr5:78073032-78281910	ARSB|-	BIN_6096	0.413678	chr5:78103200-78103600
chr5:112212084-112258236	REEP5|-	BIN_5738	0.478233	chr5:112256800-112257200
chr5:178537852-178772431	ADAMTS2|-	BIN_5953	0.448236	chr5:178554800-178555200
chr6:31110216-31126015	CCHCR1|-	BIN_6386	0.424214	chr6:31109600-31110000
chr6:31626075-31628549	C6orf47|-	BIN_6389	0.434412	chr6:31626800-31627200
chr6:33359313-33377701	KIFC1|+	BIN_6395	0.47041	chr6:33371600-33372000
chr6:37598455-37667082	MDGA1|-	BIN_6426	0.448857	chr6:37608400-37608800
chr6:99728536-99797938	C6orf168|-	BIN_6564	0.410405	chr6:99736400-99736800
chr6:157712662-157744633	C6orf35|-	BIN_6290	0.506844	chr6:157731600-157732000
chr6:157712662-157744633	C6orf35|-	BIN_6291	0.428265	chr6:157734800-157735200
chr7:2552163-2568811	LFNG|+	BIN_6777	0.431567	chr7:2552000-2552400
chr7:66460160-66704501	TYW1|+	BIN_6900	0.428265	chr7:66654000-66654400
chr7:73442119-73484237	ELN|+	BIN_6929	0.44364	chr7:73468000-73468400
chr7:75831216-75916605	SRRM3|+	BIN_6953	0.481665	chr7:75910000-75910400
chr7:100663353-100702020	MUC17|+	BIN_6570	0.478233	chr7:100675200-100675600
chr7:100770370-100782547	SERPINE1|+	BIN_6573	0.413678	chr7:100776800-100777200
chr7:105245514-105517050	ATXN7L1|-	BIN_6608	0.421398	chr7:105319200-105319600
chr7:110303110-111202573	IMMP2L|-	BIN_6625	0.476264	chr7:111019200-111019600
chr7:150065879-150109558	ZNF775|+	BIN_6726	0.448236	chr7:150100000-150100400
chr7:151253210-151574210	PRKAG2|-	BIN_6731	0.651947	chr7:151571200-151571600
chr7:152142562-152144235	CCT8L1|+	BIN_6734	0.418849	chr7:152142800-152143200
chr7:157331750-158380480	PTPRN2|-	BIN_6752	0.494556	chr7:157941200-157941600
chr8:1772142-1906807	ARHGEF10|+	BIN_7144	0.502074	chr8:1836400-1836800
chr8:17501304-17658426	MTUS1|-	BIN_7141	0.494879	chr8:17520400-17520800
chr8:85095022-85834079	RALYL|+	BIN_7312	0.51799	chr8:85113200-85113600
chr8:102698771-103137135	NCALD|-	BIN_7029	0.426395	chr8:103110000-103110400
chr8:144661867-144681711	EEF1D|-	BIN_7125	0.435569	chr8:144676400-144676800
chr8:144939497-144952632	EPPK1|-	BIN_7128	0.450589	chr8:144940400-144940800
chr8:144989321-145050902	PLEC|-	BIN_7129	0.428265	chr8:145020400-145020800
chr9:21140631-21142144	IFNW1|-	BIN_7534	0.454212	chr9:21141200-21141600
chr9:91975702-92113045	SEMA4D|-	BIN_7643	0.442477	chr9:92100000-92100400
chr9:124329336-124547809	DAB2IP|+	BIN_7417	0.421398	chr9:124425600-124426000
chr9:133320094-133376661	ASS1|+	BIN_7470	0.421398	chr9:133329200-133329600
chr10:14560556-14816896	FAM107B|-	BIN_112	0.429784	chr10:14590000-14590400
chr10:31607747-31821599	ZEB1|+	BIN_174	0.424214	chr10:31741200-31741600
chr10:34398488-35104253	PARD3|-	BIN_183	0.429784	chr10:34582000-34582400
chr10:126150403-126306457	LHPP|+	BIN_89	0.476679	chr10:126195600-126196000
chr10:135489208-135495193	DUX4L13|+	BIN_107	0.471793	chr10:135490800-135491200
chr11:3875757-4114439	STIM1|+	BIN_574	0.443237	chr11:3894800-3895200
chr11:35160417-35253949	CD44|+	BIN_565	0.436925	chr11:35186000-35186400
chr11:46417964-46615675	AMBRA1|-	BIN_604	0.415394	chr11:46421600-46422000
chr11:65101225-65120720	DPF2|+	BIN_758	0.46916	chr11:65112000-65112400
chr11:65343509-65360121	EHBP1L1|+	BIN_760	0.426395	chr11:65360400-65360800
chr11:68080077-68216743	LRP5|+	BIN_787	0.413678	chr11:68118800-68119200
chr11:70313961-70963623	SHANK2|-	BIN_808	0.426395	chr11:70728800-70729200
chr11:74811608-74917594	SLCO2B1|+	BIN_845	0.465725	chr11:74851200-74851600
chr11:112097088-112140678	PTS|+	BIN_428	0.425492	chr11:112126000-112126400
chr12:2079952-2807115	CACNA1C|+	BIN_1230	0.448236	chr12:2176800-2177200
chr12:6949118-6956557	GNB3|+	BIN_1520	0.497527	chr12:6952800-6953200
chr12:13714144-14133053	GRIN2B|-	BIN_1200	0.418849	chr12:13821200-13821600
chr12:114254543-114404176	RBM19|-	BIN_1080	0.465725	chr12:114298000-114298400
chr12:122242086-122270562	SETD1B|+	BIN_1128	0.413678	chr12:122269600-122270000
chr12:124069078-124083116	TMED2|+	BIN_1153	0.47041	chr12:124069200-124069600
chr12:132434505-132565005	EP400|+	BIN_1193	0.44857	chr12:132499200-132499600
chr13:113548692-113754053	MCF2L|+	BIN_1633	0.429784	chr13:113645200-113645600
chr14:24974561-24977471	CMA1|-	BIN_1902	0.501861	chr14:24974800-24975200
chr14:38677204-38682272	SSTR1|+	BIN_1944	0.436925	chr14:38677600-38678000
chr14:91006933-91282761	TTC7B|-	BIN_2104	0.459804	chr14:91040000-91040400
chr14:92788925-92962596	SLC24A4|+	BIN_2111	0.454089	chr14:92915600-92916000
chr14:100842755-100996640	WDR25|+	BIN_1840	0.510804	chr14:100929200-100929600
chr14:105155943-105185947	INF2|+	BIN_1863	0.418849	chr14:105168000-105168400
chr15:29213840-29410518	APBA2|+	BIN_2165	0.431567	chr15:29222800-29223200
chr15:30875128-32464722	CHRNA7|+	BIN_2174	0.64237	chr15:31466000-31466400
chr16:1203241-1271771	CACNA1H|+	BIN_2445	0.413678	chr16:1234400-1234800
chr16:1560428-1662109	IFT140|-	BIN_2464	0.413678	chr16:1576000-1576400
chr16:6069095-7763340	RBFOX1|+	BIN_2701	0.491924	chr16:7520800-7521200
chr16:31483394-31489281	TGFB1I1|+	BIN_2558	0.454212	chr16:31487200-31487600
chr16:67906975-67918406	EDC4|+	BIN_2659	0.436925	chr16:67912000-67912400
chr16:68392230-68482591	SMPD3|-	BIN_2667	0.413678	chr16:68410800-68411200
chr16:70721342-70835071	VAC14|-	BIN_2681	0.413678	chr16:70770800-70771200
chr16:88762903-88772829	RNF166|-	BIN_2749	0.435569	chr16:88766800-88767200
chr16:89642175-89663654	CPNE7|+	BIN_2755	0.436925	chr16:89663600-89664000
chr17:7975954-7991022	ALOX12B|-	BIN_3153	0.419211	chr17:7990400-7990800
chr17:17942736-17971718	C17orf39|+	BIN_2800	0.413678	chr17:17943600-17944000
chr17:37894187-37903545	GRB7|+	BIN_2901	0.436925	chr17:37893600-37894000
chr17:45726842-45760998	KPNB1|+	BIN_2955	0.418849	chr17:45726800-45727200
chr17:48450581-48458820	EME1|+	BIN_2975	0.413678	chr17:48456400-48456800
chr17:75277492-75496674	SEPT9|+	BIN_3118	0.48681	chr17:75465600-75466000
chr17:79373540-79433357	BAHCC1|+	BIN_3148	0.434412	chr17:79389600-79390000
chr17:79935426-79975280	ASPSCR1|+	BIN_3154	0.459298	chr17:79942800-79943200
chr18:10670238-11148761	FAM38B|-	BIN_3188	0.43658	chr18:10757600-10758000
chr18:33877702-34360018	FHOD3|+	BIN_3254	0.511125	chr18:33910800-33911200
chr18:46065417-46389588	CTIF|+	BIN_3284	0.433093	chr18:46386000-46386400
chr19:18979361-19006953	GDF1|-	BIN_3488	0.44857	chr19:18990800-18991200
chr19:47724079-47736023	BBC3|-	BIN_3617	0.418849	chr19:47725200-47725600
chr20:388142-411610	RBCK1|+	BIN_3837	0.417083	chr20:401200-401600
chr20:853296-896977	ANGPT4|-	BIN_4024	0.465725	chr20:875600-876000
chr20:3170996-3185331	DDRGK1|-	BIN_3777	0.438081	chr20:3180800-3181200
chr20:3451687-3631769	ATRN|+	BIN_3821	0.454089	chr20:3598400-3598800
chr20:19193290-19703545	SLC24A3|+	BIN_3717	0.476679	chr20:19664400-19664800
chr20:23545369-23549386	CST9L|-	BIN_3730	0.436925	chr20:23545600-23546000
chr20:25228705-25278650	PYGB|+	BIN_3749	0.471834	chr20:25250400-25250800
chr20:35504534-35522638	C20orf118|+	BIN_3813	0.413678	chr20:35517600-35518000
chr20:48429250-48508779	SLC9A8|+	BIN_3906	0.55514	chr20:48500000-48500400
chr20:50668202-50820847	ZFP64|-	BIN_3936	0.459279	chr20:50689200-50689600
chr20:50668202-50820847	ZFP64|-	BIN_3937	0.436925	chr20:50741600-50742000
chr20:59827559-60512307	CDH4|+	BIN_3988	0.454212	chr20:59965200-59965600
chr20:59827559-60512307	CDH4|+	BIN_3991	0.567757	chr20:60499600-60500000
chr20:60528525-60640866	TAF4|-	BIN_3992	0.418849	chr20:60564800-60565200
chr20:61273797-61317137	SLCO4A1|+	BIN_4000	0.443237	chr20:61316400-61316800
chr20:61427805-61431945	C20orf20|+	BIN_4002	0.442477	chr20:61431200-61431600
chr21:10906201-11029719	TPTE|-	BIN_4061	0.426395	chr21:10971600-10972000
chr21:10996026-11098980	BAGE2|-	BIN_4062	0.443892	chr21:11033600-11034000
chr21:36160098-37357047	RUNX1|-	BIN_4165	0.541745	chr21:36366000-36366400
chr21:42733870-45746674	MX2|+	BIN_4200	0.443237	chr21:44202000-44202400
chr21:46720160-46725172	NCRNA00315|-	BIN_4221	0.463913	chr21:46722800-46723200
chr22:38004481-38029571	GGA1|+	BIN_4549	0.454089	chr22:38008800-38009200
chr22:46756731-46933067	CELSR1|-	BIN_4658	0.511125	chr22:46770800-46771200
chrX:14547420-14749934	GLRA2|+	BIN_7775	0.443237	chrX:14675600-14676000
chrX:85403455-86087607	DACH2|+	BIN_7957	0.413678	chrX:85403200-85403600
chrX:134654584-134716435	DDX26B|+	BIN_7755	0.47041	chrX:134654800-134655200
chrY:10027986-10029907	CDC27P2|-	BIN_7975	0.468445	chrY:10029200-10029600
chr19:2328628-2355100	NM_152988,NM_001077238	BIN_3520	0.459804	chr19:2345200-2345600
Repeats, Pol III genes and other features
chr1:1610983-1611766	AluSx1_SINE_Alu,AluSp_SINE_Alu,AluJb_SINE_Alu	BIN_721	0.481665	chr1:1610800-1611200
chr1:1806619-1807111	AluSz6_SINE_Alu,AluJr_SINE_Alu	BIN_880	0.439011	chr1:1806800-1807200
chr1:1864020-1864918	AluSc8_SINE_Alu,AluY_SINE_Alu,AluSx_SINE_Alu	BIN_905	0.435565	chr1:1864400-1864800
chr1:2114382-2114841	AluSx1_SINE_Alu,AluSx3_SINE_Alu	BIN_1081	0.485544	chr1:2114400-2114800
chr1:2195715-2196140	AluSc8_SINE_Alu,AluJb_SINE_Alu	BIN_1217	0.508971	chr1:2196000-2196400
chr1:2285441-2285590	AluSz_SINE_Alu	BIN_1270	0.463913	chr1:2285200-2285600
chr1:2293392-2293685	AluSg_SINE_Alu	BIN_1273	0.428265	chr1:2293600-2294000
chr1:5405097-5405408	AluSq2_SINE_Alu	BIN_2196	0.440713	chr1:5405200-5405600
chr1:6025002-6025291	AluJr_SINE_Alu	BIN_2428	0.485949	chr1:6024800-6025200
chr1:6482179-6482801	AluSq2_SINE_Alu,AluY_SINE_Alu	BIN_2589	0.526419	chr1:6482400-6482800
chr1:6724292-6724597	AluY_SINE_Alu	BIN_2693	0.429886	chr1:6724400-6724800
chr1:7997235-7997522	AluJb_SINE_Alu	BIN_3179	0.421227	chr1:7997200-7997600
chr1:8019837-8020142	AluSz6_SINE_Alu	BIN_3181	0.50314	chr1:8019600-8020000
chr1:8104740-8104905	FAM_SINE_Alu	BIN_3186	0.492207	chr1:8104800-8105200
chr1:8367490-8367609	FLAM_C_SINE_Alu	BIN_3258	0.418849	chr1:8367600-8368000
chr1:8400211-8400521	AluSx3_SINE_Alu	BIN_3261	0.438081	chr1:8400400-8400800
chr1:9227089-9227719	AluSx_SINE_Alu,AluSg_SINE_Alu	BIN_3514	0.5158	chr1:9227200-9227600
chr1:9347857-9348151	AluSx1_SINE_Alu	BIN_3573	0.491924	chr1:9347600-9348000
chr1:9461350-9461666	AluSz_SINE_Alu	BIN_3611	0.426395	chr1:9461600-9462000
chr1:9586028-9586316	AluSp_SINE_Alu	BIN_3633	0.445795	chr1:9586000-9586400
chr1:9590623-9591235	AluSx_SINE_Alu,AluSp_SINE_Alu,AluSx_SINE_Alu	BIN_3635	0.464751	chr1:9591200-9591600
chr1:9644453-9645052	AluSx_SINE_Alu,AluJr4_SINE_Alu	BIN_3642	0.414665	chr1:9644800-9645200
chr1:9732483-9732781	AluJo_SINE_Alu	BIN_3648	0.494699	chr1:9732400-9732800
chr1:9735811-9736419	AluJb_SINE_Alu,AluSq2_SINE_Alu,AluJb_SINE_Alu	BIN_3649	0.449981	chr1:9736000-9736400
chr1:9774947-9775248	AluSx_SINE_Alu	BIN_3655	0.479911	chr1:9774800-9775200
chr1:9817302-9817598	AluY_SINE_Alu	BIN_3661	0.458083	chr1:9817200-9817600
chr1:9849755-9850062	AluJb_SINE_Alu	BIN_3666	0.424819	chr1:9849600-9850000
chr1:9905676-9905894	AluSq2_SINE_Alu	BIN_3671	0.479911	chr1:9905600-9906000
chr1:9929043-9929357	AluJo_SINE_Alu	BIN_3675	0.426324	chr1:9929200-9929600
chr1:10070169-10071076	AluSx_SINE_Alu,AluSx_SINE_Alu,AluSp_SINE_Alu,AluSx_SINE_Alu	BIN_375	0.445402	chr1:10070800-10071200
chr1:10455294-10455995	AluSz6_SINE_Alu,AluJb_SINE_Alu,AluJb_SINE_Alu	BIN_382	0.467123	chr1:10455200-10455600
chr1:10523724-10524021	AluSx_SINE_Alu	BIN_383	0.437482	chr1:10524000-10524400
chr1:10547530-10548137	AluSc_SINE_Alu,AluSz_SINE_Alu	BIN_384	0.446148	chr1:10547600-10548000
chr1:11021718-11022023	AluSz_SINE_Alu	BIN_399	0.58532	chr1:11022000-11022400
chr1:11262695-11263299	AluJb_SINE_Alu,AluSz_SINE_Alu	BIN_481	0.527961	chr1:11262800-11263200
chr1:11289875-11290035	AluJb_SINE_Alu	BIN_487	0.419058	chr1:11290000-11290400
chr1:11430550-11430866	AluY_SINE_Alu	BIN_505	0.5149	chr1:11430400-11430800
chr1:11965408-11965706	AluSx_SINE_Alu	BIN_535	0.494879	chr1:11965600-11966000
chr1:12048166-12049058	AluSg7_SINE_Alu,FLAM_C_SINE_Alu,FRAM_SINE_Alu,AluSx_SINE_Alu	BIN_537	0.534028	chr1:12048800-12049200
chr1:12133062-12133344	AluJb_SINE_Alu	BIN_539	0.449689	chr1:12133200-12133600
chr1:12265674-12265984	AluSx1_SINE_Alu	BIN_545	0.531455	chr1:12265600-12266000
chr1:12299190-12299495	AluJb_SINE_Alu	BIN_546	0.423132	chr1:12299200-12299600
chr1:13788810-13789094	AluJb_SINE_Alu	BIN_571	0.423132	chr1:13788800-13789200
chr1:13865725-13866033	AluSq2_SINE_Alu	BIN_573	0.6326	chr1:13865600-13866000
chr1:14053765-14054044	AluSx_SINE_Alu	BIN_577	0.421227	chr1:14053600-14054000
chr1:15128168-15128479	AluY_SINE_Alu	BIN_643	0.461467	chr1:15128400-15128800
chr1:15491287-15491596	AluSc_SINE_Alu	BIN_665	0.466282	chr1:15491200-15491600
chr1:15719568-15719858	AluSx4_SINE_Alu	BIN_694	0.415953	chr1:15719600-15720000
chr1:15797759-15798070	AluSz_SINE_Alu	BIN_701	0.449325	chr1:15797600-15798000
chr1:16131002-16131730	AluSz_SINE_Alu,AluJr_SINE_Alu,AluSq4_SINE_Alu	BIN_727	0.453893	chr1:16130800-16131200
chr1:16204233-16204539	AluSq2_SINE_Alu	BIN_731	0.433093	chr1:16204400-16204800
chr1:16411203-16411816	AluSx_SINE_Alu,AluSp_SINE_Alu,AluSx_SINE_Alu	BIN_749	0.43658	chr1:16411600-16412000
chr1:16601833-16602149	AluJr_SINE_Alu	BIN_769	0.432557	chr1:16602000-16602400
chr1:17022588-17022819	AluSx3_SINE_Alu	BIN_802	0.48681	chr1:17022400-17022800
chr1:17037818-17038113	AluJo_SINE_Alu	BIN_803	0.449689	chr1:17037600-17038000
chr1:17042872-17043201	AluSx_SINE_Alu	BIN_804	0.547233	chr1:17043200-17043600
chr1:17387575-17387893	AluSz_SINE_Alu	BIN_834	0.529286	chr1:17387600-17388000
chr1:17408325-17408613	AluSx_SINE_Alu	BIN_837	0.497073	chr1:17408400-17408800
chr1:19117936-19118233	AluJr4_SINE_Alu	BIN_923	0.608425	chr1:19118000-19118400
chr1:19296319-19296614	AluJr_SINE_Alu	BIN_929	0.463913	chr1:19296400-19296800
chr1:19341420-19341644	AluJb_SINE_Alu	BIN_931	0.416567	chr1:19341600-19342000
chr1:19376939-19377247	AluSx3_SINE_Alu	BIN_932	0.413678	chr1:19377200-19377600
chr1:19438046-19438548	AluSx_SINE_Alu,AluSp_SINE_Alu,AluSx_SINE_Alu	BIN_936	0.415953	chr1:19438000-19438400
chr1:19521366-19521760	FLAM_A_SINE_Alu,AluY_SINE_Alu	BIN_938	0.442477	chr1:19521600-19522000
chr1:19664491-19664775	AluSp_SINE_Alu	BIN_943	0.419211	chr1:19664400-19664800
chr1:19707381-19707683	AluSx3_SINE_Alu	BIN_945	0.417083	chr1:19707200-19707600
chr1:19715923-19716219	AluY_SINE_Alu	BIN_946	0.419058	chr1:19716000-19716400
chr1:19885751-19886081	AluSx_SINE_Alu,AluSx_SINE_Alu	BIN_959	0.423589	chr1:19885600-19886000
chr1:20153899-20154201	AluSx_SINE_Alu	BIN_972	0.410481	chr1:20154000-20154400
chr1:20201945-20202253	AluSz_SINE_Alu	BIN_975	0.463182	chr1:20202000-20202400
chr1:21121797-21122089	AluSc_SINE_Alu	BIN_1065	0.421227	chr1:21121600-21122000
chr1:21237778-21238081	AluJr4_SINE_Alu	BIN_1144	0.500763	chr1:21237600-21238000
chr1:21355388-21355812	FRAM_SINE_Alu,AluSz6_SINE_Alu	BIN_1198	0.41747	chr1:21355600-21356000
chr1:21444997-21445444	AluSx1_SINE_Alu,FAM_SINE_Alu,FAM_SINE_Alu	BIN_1202	0.410405	chr1:21444800-21445200
chr1:21462394-21463039	AluYb8_SINE_Alu,AluSx1_SINE_Alu	BIN_1203	0.417083	chr1:21462800-21463200
chr1:21533489-21534212	AluSp_SINE_Alu,AluSp_SINE_Alu,AluJr_SINE_Alu	BIN_1207	0.44446	chr1:21534000-21534400
chr1:21693189-21693795	AluSq2_SINE_Alu,AluJo_SINE_Alu	BIN_1209	0.468802	chr1:21693200-21693600
chr1:22153385-22153709	AluYc_SINE_Alu,AluSx1_SINE_Alu	BIN_1229	0.48366	chr1:22153600-22154000
chr1:22773313-22773611	AluJb_SINE_Alu	BIN_1265	0.44496	chr1:22773200-22773600
chr1:23447929-23448507	AluJb_SINE_Alu,AluSx_SINE_Alu	BIN_1318	0.523527	chr1:23448000-23448400
chr1:23931630-23932222	AluSx_SINE_Alu,AluY_SINE_Alu	BIN_1334	0.413932	chr1:23931600-23932000
chr1:23982554-23982848	AluSq2_SINE_Alu	BIN_1340	0.414665	chr1:23982400-23982800
chr1:24011387-24011684	AluSg_SINE_Alu	BIN_1342	0.43658	chr1:24011200-24011600
chr1:24032139-24033932	AluJb_SINE_Alu,AluSx1_SINE_Alu,AluSc8_SINE_Alu,AluJb_SINE_Alu,AluSx_SINE_Alu,AluSp_SINE_Alu,AluSx_SINE_Alu,AluY_SINE_Alu	BIN_1343	0.422784	chr1:24032400-24032800
chr1:24185235-24185571	AluJb_SINE_Alu	BIN_1353	0.449689	chr1:24185200-24185600
chr1:24364510-24364803	AluSz_SINE_Alu	BIN_1360	0.411895	chr1:24364800-24365200
chr1:24568939-24569240	AluSz_SINE_Alu	BIN_1376	0.429886	chr1:24568800-24569200
chr1:24812519-24812847	AluSx3_SINE_Alu	BIN_1394	0.425492	chr1:24812400-24812800
chr1:24856387-24856509	FLAM_A_SINE_Alu	BIN_1396	0.413056	chr1:24856400-24856800
chr1:24889730-24890043	AluSp_SINE_Alu	BIN_1397	0.419211	chr1:24889600-24890000
chr1:25034875-25035507	AluJb_SINE_Alu,AluSx3_SINE_Alu,AluJb_SINE_Alu	BIN_1417	0.467123	chr1:25035200-25035600
chr1:25076903-25077155	AluSp_SINE_Alu	BIN_1424	0.43658	chr1:25076800-25077200
chr1:25135016-25135468	AluJb_SINE_Alu,AluJb_SINE_Alu,AluSx1_SINE_Alu	BIN_1431	0.481665	chr1:25135200-25135600
chr1:25195923-25196356	AluSz6_SINE_Alu,AluSz6_SINE_Alu	BIN_1436	0.551832	chr1:25196000-25196400
chr1:25542110-25542401	AluSz_SINE_Alu	BIN_1454	0.473114	chr1:25542000-25542400
chr1:25697862-25698163	AluJb_SINE_Alu	BIN_1468	0.44446	chr1:25698000-25698400
chr1:26235151-26235267	AluJo_SINE_Alu	BIN_1492	0.416567	chr1:26235200-26235600
chr1:26278592-26278883	AluSz_SINE_Alu	BIN_1493	0.431304	chr1:26278400-26278800
chr1:26533977-26534287	AluSz6_SINE_Alu	BIN_1501	0.457774	chr1:26534000-26534400
chr1:26557675-26557957	AluSg_SINE_Alu	BIN_1502	0.453743	chr1:26557600-26558000
chr1:26628579-26628882	AluSc8_SINE_Alu	BIN_1509	0.489632	chr1:26628400-26628800
chr1:26733362-26733670	AluSg4_SINE_Alu	BIN_1511	0.419058	chr1:26733200-26733600
chr1:26775565-26776348	AluJb_SINE_Alu,AluSx1_SINE_Alu,AluJb_SINE_Alu,AluSx_SINE_Alu	BIN_1513	0.424299	chr1:26776000-26776400
chr1:26878598-26878900	AluSc5_SINE_Alu	BIN_1515	0.681071	chr1:26878400-26878800
chr1:27192662-27194042	AluSx_SINE_Alu,AluJr_SINE_Alu,AluYg6_SINE_Alu,AluSx3_SINE_Alu,AluJb_SINE_Alu	BIN_1532	0.476264	chr1:27193200-27193600
chr1:27264131-27264439	AluJb_SINE_Alu	BIN_1537	0.418849	chr1:27264400-27264800
chr1:27301197-27301797	AluSc8_SINE_Alu,AluSx3_SINE_Alu	BIN_1539	0.508971	chr1:27301600-27302000
chr1:27446649-27447244	AluSq_SINE_Alu,AluSx1_SINE_Alu	BIN_1540	0.441996	chr1:27446800-27447200
chr1:27584271-27585050	AluSg_SINE_Alu,FLAM_C_SINE_Alu,AluSx1_SINE_Alu	BIN_1541	0.413932	chr1:27584400-27584800
chr1:28091113-28091745	AluSz6_SINE_Alu,AluSx1_SINE_Alu	BIN_1560	0.475725	chr1:28091200-28091600
chr1:28118045-28118499	AluSc8_SINE_Alu,AluSc_SINE_Alu	BIN_1562	0.453743	chr1:28118000-28118400
chr1:28326821-28327578	AluY_SINE_Alu,AluJr_SINE_Alu,AluJb_SINE_Alu	BIN_1568	0.498685	chr1:28327200-28327600
chr1:28510593-28510903	AluSz_SINE_Alu	BIN_1569	0.470704	chr1:28510800-28511200
chr1:28665533-28666147	AluJr_SINE_Alu,AluSx_SINE_Alu	BIN_1571	0.43367	chr1:28666000-28666400
chr1:28813096-28814049	AluSz_SINE_Alu,AluJb_SINE_Alu,AluJb_SINE_Alu,AluSc8_SINE_Alu,AluJb_SINE_Alu	BIN_1574	0.536622	chr1:28813200-28813600
chr1:28846082-28846514	AluSq_SINE_Alu,AluSx_SINE_Alu	BIN_1575	0.681071	chr1:28846400-28846800
chr1:29180248-29180552	AluSz_SINE_Alu	BIN_1583	0.44496	chr1:29180400-29180800
chr1:29219306-29219881	AluSz6_SINE_Alu,AluJb_SINE_Alu	BIN_1584	0.473114	chr1:29219600-29220000
chr1:30718282-30718580	AluSz_SINE_Alu	BIN_1607	0.470704	chr1:30718400-30718800
chr1:30828537-30828840	AluSz_SINE_Alu	BIN_1608	0.458431	chr1:30828400-30828800
chr1:31481738-31482044	AluSc8_SINE_Alu	BIN_1639	0.438081	chr1:31482000-31482400
chr1:31546763-31548276	AluJb_SINE_Alu,AluJo_SINE_Alu,AluSx_SINE_Alu,AluSx1_SINE_Alu,AluSc_SINE_Alu,AluSx_SINE_Alu	BIN_1640	0.427162	chr1:31546800-31547200
chr1:31591921-31592844	AluJb_SINE_Alu,AluSx1_SINE_Alu,AluJb_SINE_Alu,AluSx_SINE_Alu,AluJb_SINE_Alu	BIN_1641	0.459804	chr1:31592800-31593200
chr1:31595322-31595615	AluJo_SINE_Alu	BIN_1642	0.454212	chr1:31595600-31596000
chr1:31610014-31610870	FRAM_SINE_Alu,AluSq_SINE_Alu,AluJb_SINE_Alu,AluSz6_SINE_Alu	BIN_1643	0.428265	chr1:31610800-31611200
chr1:31834633-31834956	AluSc_SINE_Alu	BIN_1645	0.558707	chr1:31834800-31835200
chr1:31988967-31989266	AluSx_SINE_Alu	BIN_1647	0.476679	chr1:31988800-31989200
chr1:32714657-32715321	AluSx1_SINE_Alu,AluSq4_SINE_Alu	BIN_1674	0.421098	chr1:32714400-32714800
chr1:32791345-32791643	AluSx_SINE_Alu	BIN_1677	0.478356	chr1:32791600-32792000
chr1:33078016-33078286	AluSx_SINE_Alu	BIN_1689	0.429952	chr1:33078000-33078400
chr1:33084832-33085128	AluJb_SINE_Alu	BIN_1690	0.424819	chr1:33084800-33085200
chr1:33091471-33091773	AluSq2_SINE_Alu	BIN_1691	0.443892	chr1:33091600-33092000
chr1:33200449-33201033	AluSp_SINE_Alu,AluSg_SINE_Alu	BIN_1698	0.538	chr1:33200800-33201200
chr1:33344967-33346199	AluY_SINE_Alu,AluSx_SINE_Alu,AluSp_SINE_Alu,AluSx_SINE_Alu,AluY_SINE_Alu	BIN_1705	0.410481	chr1:33345200-33345600
chr1:33537403-33537711	AluJb_SINE_Alu,AluJb_SINE_Alu	BIN_1709	0.413678	chr1:33537600-33538000
chr1:33586884-33587201	AluSx_SINE_Alu	BIN_1711	0.419211	chr1:33586800-33587200
chr1:33771082-33771381	AluSz_SINE_Alu	BIN_1715	0.511125	chr1:33770800-33771200
chr1:35397997-35398309	AluY_SINE_Alu	BIN_1753	0.413932	chr1:35398000-35398400
chr1:35418359-35418667	AluSz6_SINE_Alu	BIN_1756	0.475246	chr1:35418400-35418800
chr1:35518696-35519003	AluSx3_SINE_Alu	BIN_1757	0.560051	chr1:35518800-35519200
chr1:35700126-35700751	AluSx_SINE_Alu,AluSq2_SINE_Alu,AluSx_SINE_Alu	BIN_1758	0.434666	chr1:35700000-35700400
chr1:35773145-35773892	AluY_SINE_Alu,AluSq10_SINE_Alu,AluSz_SINE_Alu	BIN_1762	0.508971	chr1:35773600-35774000
chr1:36171425-36172008	AluJo_SINE_Alu,AluSx_SINE_Alu	BIN_1770	0.419328	chr1:36171600-36172000
chr1:36460552-36460810	AluSx_SINE_Alu	BIN_1774	0.5149	chr1:36460400-36460800
chr1:36461283-36461578	AluSz_SINE_Alu	BIN_1775	0.440713	chr1:36461200-36461600
chr1:36882685-36882980	AluY_SINE_Alu	BIN_1780	0.426395	chr1:36882400-36882800
chr1:37793679-37793986	AluSx1_SINE_Alu	BIN_1792	0.466282	chr1:37793600-37794000
chr1:37994999-37995913	AluSp_SINE_Alu,AluSq_SINE_Alu,AluJr_SINE_Alu	BIN_1795	0.458431	chr1:37995600-37996000
chr1:38005030-38005322	AluSg_SINE_Alu	BIN_1796	0.499913	chr1:38005200-38005600
chr1:38015030-38015312	AluJb_SINE_Alu	BIN_1797	0.48017	chr1:38014800-38015200
chr1:38523471-38524094	AluJr_SINE_Alu,AluSx1_SINE_Alu	BIN_1805	0.497527	chr1:38523600-38524000
chr1:38681426-38681732	AluSp_SINE_Alu	BIN_1808	0.573349	chr1:38681600-38682000
chr1:39263313-39263619	AluSq_SINE_Alu	BIN_1812	0.440713	chr1:39263200-39263600
chr1:39663275-39664518	AluJr_SINE_Alu,AluJo_SINE_Alu,AluSx_SINE_Alu,AluSq2_SINE_Alu,AluSx_SINE_Alu	BIN_1821	0.480865	chr1:39663600-39664000
chr1:39803234-39803740	AluSc8_SINE_Alu,AluY_SINE_Alu	BIN_1824	0.524583	chr1:39803600-39804000
chr1:40078810-40079117	AluJr4_SINE_Alu	BIN_1833	0.463182	chr1:40078800-40079200
chr1:40354770-40355073	AluSz6_SINE_Alu	BIN_1834	0.479911	chr1:40354800-40355200
chr1:40360271-40360561	AluJb_SINE_Alu	BIN_1835	0.433093	chr1:40360400-40360800
chr1:40369434-40369746	AluY_SINE_Alu	BIN_1836	0.425492	chr1:40369200-40369600
chr1:40708455-40708748	AluSc8_SINE_Alu	BIN_1837	0.440713	chr1:40708400-40708800
chr1:41036213-41036502	AluSx_SINE_Alu	BIN_1855	0.507213	chr1:41036000-41036400
chr1:41325838-41326097	AluSc_SINE_Alu	BIN_1874	0.453984	chr1:41325600-41326000
chr1:41427671-41427948	AluSx_SINE_Alu	BIN_1875	0.424819	chr1:41427600-41428000
chr1:42216374-42216679	AluSz_SINE_Alu	BIN_1889	0.431304	chr1:42216400-42216800
chr1:43755292-43755927	AluSz_SINE_Alu,AluY_SINE_Alu	BIN_1942	0.453625	chr1:43755200-43755600
chr1:43948166-43948771	AluJb_SINE_Alu,AluY_SINE_Alu	BIN_1946	0.508928	chr1:43948000-43948400
chr1:44700429-44700578	AluSz6_SINE_Alu	BIN_1957	0.427162	chr1:44700400-44700800
chr1:44896885-44897195	AluSg7_SINE_Alu	BIN_1960	0.43658	chr1:44896800-44897200
chr1:44916573-44916880	AluY_SINE_Alu	BIN_1961	0.522361	chr1:44916800-44917200
chr1:45236096-45236439	FLAM_A_SINE_Alu,AluY_SINE_Alu	BIN_1972	0.437482	chr1:45236000-45236400
chr1:45353328-45353583	AluSg_SINE_Alu	BIN_1979	0.419058	chr1:45353200-45353600
chr1:46031773-46032097	AluSq_SINE_Alu	BIN_1995	0.415394	chr1:46031600-46032000
chr1:46036889-46037312	FLAM_C_SINE_Alu,AluSx1_SINE_Alu,FLAM_C_SINE_Alu	BIN_1996	0.454089	chr1:46037200-46037600
chr1:46770059-46770356	AluSx1_SINE_Alu	BIN_2025	0.429952	chr1:46770000-46770400
chr1:46825051-46825493	AluSc_SINE_Alu,AluSx_SINE_Alu,AluJo_SINE_Alu	BIN_2030	0.422784	chr1:46825200-46825600
chr1:47772544-47772986	AluSz_SINE_Alu,AluSx_SINE_Alu	BIN_2076	0.512498	chr1:47772400-47772800
chr1:47801029-47801330	AluSq4_SINE_Alu	BIN_2078	0.48017	chr1:47800800-47801200
chr1:48033004-48033320	AluSx3_SINE_Alu	BIN_2081	0.494879	chr1:48033200-48033600
chr1:50628269-50628555	AluSz6_SINE_Alu	BIN_2123	0.517933	chr1:50628400-50628800
chr1:51084424-51084728	AluSx_SINE_Alu	BIN_2130	0.445402	chr1:51084400-51084800
chr1:51126164-51126461	AluSg_SINE_Alu	BIN_2131	0.429784	chr1:51126400-51126800
chr1:51156922-51157213	AluSz_SINE_Alu	BIN_2132	0.43658	chr1:51156800-51157200
chr1:51377085-51377376	AluSz_SINE_Alu	BIN_2133	0.411676	chr1:51377200-51377600
chr1:51744096-51744383	AluSc_SINE_Alu	BIN_2134	0.424299	chr1:51744000-51744400
chr1:51864940-51865542	AluSz6_SINE_Alu,AluSz_SINE_Alu	BIN_2135	0.482853	chr1:51865200-51865600
chr1:51976554-51977170	AluSx1_SINE_Alu,AluSz_SINE_Alu	BIN_2136	0.497073	chr1:51976400-51976800
chr1:52029470-52029754	AluJr4_SINE_Alu	BIN_2138	0.428265	chr1:52029200-52029600
chr1:52101830-52102458	AluJr_SINE_Alu,AluJb_SINE_Alu,AluJr_SINE_Alu	BIN_2143	0.43367	chr1:52102000-52102400
chr1:52185986-52186293	AluSc8_SINE_Alu	BIN_2144	0.419328	chr1:52186000-52186400
chr1:52265640-52265944	AluJo_SINE_Alu	BIN_2147	0.487468	chr1:52265600-52266000
chr1:52366233-52366785	AluSx1_SINE_Alu,AluSq2_SINE_Alu	BIN_2149	0.424819	chr1:52366400-52366800
chr1:52495759-52495997	AluJb_SINE_Alu	BIN_2151	0.48017	chr1:52495600-52496000
chr1:52758137-52758440	AluSg_SINE_Alu	BIN_2157	0.421398	chr1:52758400-52758800
chr1:52765981-52766281	AluSg_SINE_Alu	BIN_2158	0.415953	chr1:52766000-52766400
chr1:52792238-52792850	AluSq2_SINE_Alu,AluSc_SINE_Alu	BIN_2159	0.508971	chr1:52792800-52793200
chr1:52945384-52945691	AluY_SINE_Alu	BIN_2166	0.421398	chr1:52945200-52945600
chr1:53087043-53087359	AluSz_SINE_Alu	BIN_2170	0.458826	chr1:53086800-53087200
chr1:53105143-53105761	AluY_SINE_Alu,AluJb_SINE_Alu	BIN_2171	0.421227	chr1:53105600-53106000
chr1:53116297-53116616	AluSx1_SINE_Alu	BIN_2173	0.439079	chr1:53116400-53116800
chr1:54286824-54287137	AluSz6_SINE_Alu	BIN_2211	0.482853	chr1:54286800-54287200
chr1:54343488-54343754	AluJr_SINE_Alu	BIN_2218	0.414665	chr1:54343600-54344000
chr1:54781283-54781634	AluJo_SINE_Alu,AluJo_SINE_Alu	BIN_2241	0.449843	chr1:54781600-54782000
chr1:54932302-54932560	AluYc_SINE_Alu	BIN_2248	0.4697	chr1:54932400-54932800
chr1:54957359-54958465	AluJb_SINE_Alu,AluSc_SINE_Alu,AluSp_SINE_Alu,AluSz_SINE_Alu	BIN_2251	0.429886	chr1:54958400-54958800
chr1:54987009-54987316	AluJb_SINE_Alu	BIN_2252	0.414665	chr1:54987200-54987600
chr1:55102917-55103469	AluSz_SINE_Alu,AluSx1_SINE_Alu	BIN_2262	0.423132	chr1:55102800-55103200
chr1:55122578-55123633	AluJr_SINE_Alu,AluJb_SINE_Alu,AluJr_SINE_Alu,AluSx_SINE_Alu	BIN_2263	0.428638	chr1:55123200-55123600
chr1:55126895-55127184	AluSx_SINE_Alu	BIN_2264	0.410405	chr1:55126800-55127200
chr1:55412941-55413240	AluSx1_SINE_Alu	BIN_2277	0.513122	chr1:55413200-55413600
chr1:55666996-55667302	AluSg4_SINE_Alu	BIN_2286	0.435565	chr1:55666800-55667200
chr1:56477851-56478485	AluSz_SINE_Alu,AluSx3_SINE_Alu	BIN_2312	0.449325	chr1:56478000-56478400
chr1:59368190-59368511	AluSz6_SINE_Alu	BIN_2413	0.424214	chr1:59368400-59368800
chr1:59934262-59934565	AluY_SINE_Alu	BIN_2423	0.421098	chr1:59934400-59934800
chr1:60021389-60021678	AluSq2_SINE_Alu	BIN_2425	0.511125	chr1:60021600-60022000
chr1:60092247-60092542	AluSg_SINE_Alu	BIN_2426	0.47041	chr1:60092000-60092400
chr1:60962975-60963278	AluSx_SINE_Alu	BIN_2429	0.46916	chr1:60963200-60963600
chr1:61580642-61580952	AluSx_SINE_Alu	BIN_2466	0.428265	chr1:61580800-61581200
chr1:62084611-62084935	AluJo_SINE_Alu	BIN_2499	0.414665	chr1:62084800-62085200
chr1:62183524-62183990	AluJb_SINE_Alu,AluJb_SINE_Alu	BIN_2506	0.457774	chr1:62183600-62184000
chr1:62874861-62875146	AluJb_SINE_Alu	BIN_2541	0.476679	chr1:62874800-62875200
chr1:63075508-63075819	AluSg_SINE_Alu	BIN_2553	0.43367	chr1:63075600-63076000
chr1:63759002-63759304	AluJo_SINE_Alu	BIN_2570	0.559346	chr1:63758800-63759200
chr1:63829101-63829695	AluYc_SINE_Alu,AluY_SINE_Alu	BIN_2573	0.478393	chr1:63829600-63830000
chr1:63911271-63911869	AluJo_SINE_Alu,AluSz_SINE_Alu	BIN_2575	0.449689	chr1:63911600-63912000
chr1:63934117-63934732	AluY_SINE_Alu,AluSp_SINE_Alu,AluY_SINE_Alu	BIN_2576	0.497073	chr1:63934400-63934800
chr1:64631378-64631677	AluSz6_SINE_Alu	BIN_2580	0.567757	chr1:64631600-64632000
chr1:64911887-64912189	AluY_SINE_Alu	BIN_2591	0.540816	chr1:64912000-64912400
chr1:65128954-65129263	AluY_SINE_Alu	BIN_2601	0.461973	chr1:65128800-65129200
chr1:65251050-65251351	AluSz_SINE_Alu	BIN_2605	0.484704	chr1:65251200-65251600
chr1:65679774-65680093	AluSx_SINE_Alu	BIN_2619	0.449107	chr1:65679600-65680000
chr1:65702703-65703344	AluJr_SINE_Alu,AluSz_SINE_Alu	BIN_2620	0.467123	chr1:65702800-65703200
chr1:67744687-67744975	AluSx1_SINE_Alu	BIN_2709	0.413678	chr1:67744400-67744800
chr1:68071894-68072075	AluJr4_SINE_Alu	BIN_2719	0.419058	chr1:68072000-68072400
chr1:68146542-68146843	AluJo_SINE_Alu	BIN_2721	0.427162	chr1:68146400-68146800
chr1:68486067-68486696	AluSz_SINE_Alu,AluSx_SINE_Alu	BIN_2731	0.568485	chr1:68486400-68486800
chr1:68845945-68846056	AluJb_SINE_Alu	BIN_2746	0.438081	chr1:68846000-68846400
chr1:70525713-70526001	AluSz6_SINE_Alu	BIN_2763	0.453893	chr1:70525600-70526000
chr1:70785010-70785305	AluSq2_SINE_Alu	BIN_2764	0.614802	chr1:70784800-70785200
chr1:70802982-70803295	AluSq2_SINE_Alu	BIN_2765	0.424819	chr1:70802800-70803200
chr1:70863248-70863545	AluSz_SINE_Alu	BIN_2766	0.458083	chr1:70863200-70863600
chr1:71349463-71349792	AluSz_SINE_Alu	BIN_2783	0.48366	chr1:71349600-71350000
chr1:72838132-72838394	AluSx3_SINE_Alu	BIN_2842	0.421098	chr1:72838000-72838400
chr1:76011497-76011806	AluJo_SINE_Alu	BIN_3022	0.488603	chr1:76011600-76012000
chr1:76250712-76250985	AluY_SINE_Alu	BIN_3031	0.463182	chr1:76250800-76251200
chr1:76317086-76317394	AluSz6_SINE_Alu	BIN_3036	0.410405	chr1:76317200-76317600
chr1:76600545-76600837	AluSx_SINE_Alu	BIN_3057	0.535217	chr1:76600400-76600800
chr1:77687010-77687308	AluSx_SINE_Alu	BIN_3132	0.534647	chr1:77687200-77687600
chr1:77960470-77960766	AluY_SINE_Alu	BIN_3151	0.423132	chr1:77960400-77960800
chr1:78389765-78390061	AluSz_SINE_Alu	BIN_3165	0.429886	chr1:78390000-78390400
chr1:79396132-79396433	AluSg7_SINE_Alu	BIN_3174	0.426395	chr1:79396400-79396800
chr1:80029863-80030160	AluSg_SINE_Alu	BIN_3180	0.508928	chr1:80029600-80030000
chr1:85630636-85630923	AluSx1_SINE_Alu	BIN_3309	0.428265	chr1:85630400-85630800
chr1:86638320-86638621	AluJb_SINE_Alu	BIN_3337	0.534647	chr1:86638400-86638800
chr1:86962424-86962710	AluSc_SINE_Alu	BIN_3342	0.470704	chr1:86962400-86962800
chr1:87118727-87119035	AluSc5_SINE_Alu	BIN_3349	0.411895	chr1:87118800-87119200
chr1:87143501-87143838	AluSq_SINE_Alu	BIN_3350	0.427162	chr1:87143600-87144000
chr1:87937183-87937487	AluSx1_SINE_Alu	BIN_3369	0.419058	chr1:87937200-87937600
chr1:89055600-89055907	AluJb_SINE_Alu	BIN_3373	0.435565	chr1:89055600-89056000
chr1:91533514-91533801	AluSq2_SINE_Alu	BIN_3448	0.458431	chr1:91533600-91534000
chr1:92053698-92054009	AluSq_SINE_Alu	BIN_3499	0.466282	chr1:92053600-92054000
chr1:92252578-92252884	AluSc_SINE_Alu	BIN_3510	0.458826	chr1:92252800-92253200
chr1:92813469-92813745	AluSg_SINE_Alu	BIN_3529	0.434412	chr1:92813600-92814000
chr1:93440795-93441121	AluY_SINE_Alu	BIN_3568	0.442539	chr1:93440800-93441200
chr1:93447434-93447747	AluJb_SINE_Alu	BIN_3569	0.463182	chr1:93447600-93448000
chr1:93569957-93570252	AluSc_SINE_Alu	BIN_3586	0.419328	chr1:93570000-93570400
chr1:93600518-93600828	AluSz_SINE_Alu	BIN_3588	0.424819	chr1:93600400-93600800
chr1:93950430-93950734	AluJr_SINE_Alu	BIN_3596	0.563753	chr1:93950400-93950800
chr1:94231228-94231520	AluSg4_SINE_Alu	BIN_3603	0.419211	chr1:94231200-94231600
chr1:95449302-95449598	AluSc8_SINE_Alu	BIN_3627	0.427162	chr1:95449200-95449600
chr1:95469771-95470569	AluSx1_SINE_Alu,AluY_SINE_Alu,AluSx_SINE_Alu	BIN_3628	0.464257	chr1:95470000-95470400
chr1:95708192-95708488	AluSx_SINE_Alu	BIN_3631	0.453984	chr1:95708400-95708800
chr1:96367310-96367622	AluSp_SINE_Alu	BIN_3639	0.465533	chr1:96367200-96367600
chr1:97952947-97953257	AluY_SINE_Alu	BIN_3658	0.425492	chr1:97952800-97953200
chr1:100393997-100394886	AluJo_SINE_Alu,AluJb_SINE_Alu,AluSz_SINE_Alu	BIN_374	0.438081	chr1:100394800-100395200
chr1:100781850-100782023	AluJb_SINE_Alu	BIN_376	0.414665	chr1:100781600-100782000
chr1:100867312-100867607	AluSp_SINE_Alu	BIN_377	0.413056	chr1:100867200-100867600
chr1:101252973-101253242	AluSz6_SINE_Alu	BIN_379	0.510804	chr1:101252800-101253200
chr1:101443293-101443609	AluSq2_SINE_Alu	BIN_380	0.435565	chr1:101443200-101443600
chr1:103062281-103062555	AluSx1_SINE_Alu	BIN_381	0.527433	chr1:103062400-103062800
chr1:109153271-109153581	AluY_SINE_Alu	BIN_387	0.484704	chr1:109153200-109153600
chr1:109211344-109211537	AluJb_SINE_Alu	BIN_388	0.453893	chr1:109211200-109211600
chr1:109245728-109246321	AluSx_SINE_Alu,AluSg_SINE_Alu,AluSx_SINE_Alu	BIN_389	0.569533	chr1:109245600-109246000
chr1:109561154-109562075	AluJb_SINE_Alu,AluJb_SINE_Alu,AluSx1_SINE_Alu,AluYk11_SINE_Alu	BIN_390	0.453681	chr1:109561200-109561600
chr1:110139801-110140073	AluSx1_SINE_Alu	BIN_395	0.554605	chr1:110140000-110140400
chr1:112129008-112129219	AluJb_SINE_Alu	BIN_459	0.488603	chr1:112129200-112129600
chr1:112666626-112666910	AluSz_SINE_Alu	BIN_483	0.599535	chr1:112666800-112667200
chr1:113020573-113020885	AluJb_SINE_Alu	BIN_494	0.5045	chr1:113020800-113021200
chr1:113027804-113028098	AluSz6_SINE_Alu	BIN_495	0.443892	chr1:113027600-113028000
chr1:113288635-113289262	AluSp_SINE_Alu,AluSg_SINE_Alu	BIN_498	0.443892	chr1:113289200-113289600
chr1:113425722-113426047	AluY_SINE_Alu	BIN_501	0.569052	chr1:113426000-113426400
chr1:113468931-113469761	AluSx_SINE_Alu,AluJb_SINE_Alu,AluJb_SINE_Alu	BIN_503	0.432557	chr1:113469200-113469600
chr1:113595362-113595646	AluSp_SINE_Alu	BIN_504	0.5149	chr1:113595600-113596000
chr1:114421465-114421770	AluSq2_SINE_Alu	BIN_508	0.436925	chr1:114421200-114421600
chr1:114445700-114445987	AluSx_SINE_Alu	BIN_509	0.44446	chr1:114445600-114446000
chr1:114496567-114496884	AluJo_SINE_Alu	BIN_510	0.448236	chr1:114496800-114497200
chr1:115083748-115084070	AluSx_SINE_Alu	BIN_512	0.44446	chr1:115084000-115084400
chr1:116361248-116361553	AluSx_SINE_Alu	BIN_519	0.449518	chr1:116361200-116361600
chr1:116442327-116442875	AluSc8_SINE_Alu,AluSx1_SINE_Alu	BIN_520	0.494438	chr1:116442400-116442800
chr1:117079595-117079834	AluJr_SINE_Alu	BIN_524	0.413678	chr1:117079200-117079600
chr1:142623296-142623589	AluY_SINE_Alu	BIN_580	0.556656	chr1:142623200-142623600
chr1:145113482-145113773	AluSz6_SINE_Alu	BIN_594	0.421398	chr1:145113200-145113600
chr1:145732160-145732453	AluY_SINE_Alu	BIN_597	0.439949	chr1:145732000-145732400
chr1:146315490-146315774	AluSg7_SINE_Alu	BIN_603	0.415394	chr1:146315600-146316000
chr1:147055088-147055377	AluSx_SINE_Alu	BIN_614	0.535731	chr1:147055200-147055600
chr1:147103334-147103639	AluSc_SINE_Alu	BIN_615	0.415394	chr1:147103200-147103600
chr1:148554042-148554340	AluSx_SINE_Alu	BIN_626	0.48588	chr1:148554000-148554400
chr1:150069182-150069844	AluSg_SINE_Alu,AluSz_SINE_Alu	BIN_631	0.413056	chr1:150069600-150070000
chr1:150274035-150274325	AluSx3_SINE_Alu	BIN_634	0.481204	chr1:150274000-150274400
chr1:150281430-150282033	AluSq2_SINE_Alu,AluY_SINE_Alu	BIN_635	0.593811	chr1:150281600-150282000
chr1:150331300-150331595	AluSx1_SINE_Alu	BIN_636	0.446148	chr1:150331200-150331600
chr1:150410478-150411115	AluSx4_SINE_Alu,AluSx1_SINE_Alu	BIN_637	0.449325	chr1:150410800-150411200
chr1:150553590-150553702	AluSx_SINE_Alu	BIN_638	0.413056	chr1:150553600-150554000
chr1:150583135-150583755	AluJb_SINE_Alu,AluSz_SINE_Alu	BIN_639	0.414665	chr1:150583600-150584000
chr1:150910423-150910708	AluSg_SINE_Alu	BIN_640	0.568485	chr1:150910400-150910800
chr1:151046116-151047093	AluSg_SINE_Alu,AluYk4_SINE_Alu,AluY_SINE_Alu	BIN_641	0.56297	chr1:151046400-151046800
chr1:151078813-151079113	AluSz6_SINE_Alu	BIN_642	0.453743	chr1:151078800-151079200
chr1:152050687-152050894	AluSc_SINE_Alu	BIN_645	0.541548	chr1:152050800-152051200
chr1:153470379-153470593	AluJr_SINE_Alu	BIN_647	0.473114	chr1:153470400-153470800
chr1:153510241-153510538	AluSq2_SINE_Alu	BIN_648	0.448857	chr1:153510400-153510800
chr1:153683922-153684792	AluSg_SINE_Alu,AluSz_SINE_Alu,AluSq2_SINE_Alu	BIN_651	0.421398	chr1:153683600-153684000
chr1:153696128-153696598	AluSz6_SINE_Alu,AluJr_SINE_Alu	BIN_652	0.440713	chr1:153696400-153696800
chr1:153806009-153806778	AluSq_SINE_Alu,AluJo_SINE_Alu,AluY_SINE_Alu	BIN_653	0.431304	chr1:153806000-153806400
chr1:153808187-153808498	AluSz_SINE_Alu	BIN_654	0.411895	chr1:153808000-153808400
chr1:153832806-153833102	AluJr4_SINE_Alu	BIN_655	0.554128	chr1:153832800-153833200
chr1:153838320-153838701	AluJo_SINE_Alu,AluSx_SINE_Alu	BIN_656	0.415953	chr1:153838400-153838800
chr1:153907821-153908122	AluSx1_SINE_Alu	BIN_657	0.439079	chr1:153908000-153908400
chr1:154141007-154141611	AluSz6_SINE_Alu,AluSz_SINE_Alu	BIN_658	0.522504	chr1:154141200-154141600
chr1:154275706-154276745	AluJb_SINE_Alu,AluSq_SINE_Alu,AluSz_SINE_Alu,AluSx1_SINE_Alu	BIN_659	0.438287	chr1:154276000-154276400
chr1:154282386-154282932	AluSz_SINE_Alu,AluSp_SINE_Alu	BIN_660	0.431304	chr1:154282800-154283200
chr1:154333242-154333542	AluSz_SINE_Alu	BIN_661	0.445402	chr1:154333200-154333600
chr1:154873000-154873314	AluSx1_SINE_Alu	BIN_663	0.414665	chr1:154872800-154873200
chr1:154905294-154906367	AluJr_SINE_Alu,AluSq2_SINE_Alu,AluSg_SINE_Alu,AluSz6_SINE_Alu	BIN_664	0.411676	chr1:154906000-154906400
chr1:155104737-155105315	AluSq2_SINE_Alu,AluSx_SINE_Alu	BIN_668	0.537696	chr1:155104800-155105200
chr1:155155035-155155338	AluSp_SINE_Alu	BIN_670	0.435563	chr1:155155200-155155600
chr1:155459764-155460054	AluY_SINE_Alu	BIN_672	0.412656	chr1:155460000-155460400
chr1:155634247-155634512	AluSz6_SINE_Alu	BIN_674	0.46916	chr1:155634000-155634400
chr1:155687894-155688488	AluSx1_SINE_Alu,AluY_SINE_Alu	BIN_675	0.466282	chr1:155688000-155688400
chr1:155966906-155967678	AluJo_SINE_Alu,AluSq2_SINE_Alu,FLAM_C_SINE_Alu,AluSx_SINE_Alu	BIN_676	0.462755	chr1:155967600-155968000
chr1:156032930-156033240	AluSc_SINE_Alu	BIN_677	0.547735	chr1:156033200-156033600
chr1:156061111-156061419	AluSp_SINE_Alu	BIN_678	0.516495	chr1:156060800-156061200
chr1:156267504-156268052	AluSx_SINE_Alu,AluSx_SINE_Alu,AluSq2_SINE_Alu	BIN_682	0.42251	chr1:156267600-156268000
chr1:156367643-156368266	AluY_SINE_Alu,AluSp_SINE_Alu	BIN_684	0.422784	chr1:156368000-156368400
chr1:156476799-156477389	AluJb_SINE_Alu,AluSc_SINE_Alu,AluJb_SINE_Alu	BIN_685	0.530799	chr1:156476800-156477200
chr1:156862365-156862986	AluJb_SINE_Alu,AluSx1_SINE_Alu,AluJb_SINE_Alu	BIN_689	0.425492	chr1:156862800-156863200
chr1:157159254-157159552	AluSg_SINE_Alu	BIN_692	0.432557	chr1:157159200-157159600
chr1:159187876-159188182	AluSx_SINE_Alu	BIN_705	0.439949	chr1:159188000-159188400
chr1:160017541-160017830	AluSz_SINE_Alu	BIN_710	0.417083	chr1:160017600-160018000
chr1:160115021-160115326	AluSz_SINE_Alu	BIN_711	0.453813	chr1:160114800-160115200
chr1:161000473-161000784	AluSz_SINE_Alu	BIN_718	0.498685	chr1:161000400-161000800
chr1:161005675-161005870	AluSp_SINE_Alu	BIN_719	0.458431	chr1:161005600-161006000
chr1:161083302-161083572	AluJb_SINE_Alu	BIN_722	0.435565	chr1:161083200-161083600
chr1:161138448-161138753	AluSz_SINE_Alu	BIN_723	0.473974	chr1:161138400-161138800
chr1:161235522-161235823	AluSq_SINE_Alu	BIN_726	0.709982	chr1:161235600-161236000
chr1:161400329-161400609	AluSx_SINE_Alu	BIN_728	0.443237	chr1:161400000-161400400
chr1:161689490-161689784	AluSq2_SINE_Alu	BIN_729	0.46916	chr1:161689200-161689600
chr1:162509636-162509933	AluSp_SINE_Alu	BIN_736	0.428638	chr1:162509600-162510000
chr1:162768503-162768812	AluSp_SINE_Alu	BIN_738	0.439011	chr1:162768400-162768800
chr1:163028647-163028943	AluSp_SINE_Alu	BIN_740	0.433093	chr1:163028800-163029200
chr1:164427221-164427860	AluSx_SINE_Alu,AluYa5_SINE_Alu	BIN_751	0.521508	chr1:164427200-164427600
chr1:164720270-164720569	AluSz_SINE_Alu	BIN_753	0.431567	chr1:164720000-164720400
chr1:165235811-165236136	AluY_SINE_Alu	BIN_759	0.535217	chr1:165236000-165236400
chr1:165629581-165629864	AluJb_SINE_Alu	BIN_762	0.429886	chr1:165629600-165630000
chr1:165783706-165784003	AluSz6_SINE_Alu	BIN_763	0.47697	chr1:165783600-165784000
chr1:165944576-165944886	AluSc8_SINE_Alu	BIN_767	0.421227	chr1:165944800-165945200
chr1:167755031-167755329	AluY_SINE_Alu	BIN_779	0.44857	chr1:167754800-167755200
chr1:167998936-167999240	AluY_SINE_Alu	BIN_782	0.415394	chr1:167998800-167999200
chr1:170456077-170456359	AluSc_SINE_Alu	BIN_805	0.410405	chr1:170456000-170456400
chr1:170627000-170627257	AluY_SINE_Alu	BIN_807	0.433093	chr1:170626800-170627200
chr1:171264710-171265002	AluSc5_SINE_Alu	BIN_815	0.413678	chr1:171264400-171264800
chr1:171297176-171297803	AluSq2_SINE_Alu,AluSz6_SINE_Alu	BIN_816	0.411676	chr1:171297200-171297600
chr1:171735889-171736196	AluSx1_SINE_Alu	BIN_818	0.421398	chr1:171735600-171736000
chr1:173385785-173386035	AluSz6_SINE_Alu	BIN_829	0.460418	chr1:173386000-173386400
chr1:173750465-173750719	AluJb_SINE_Alu	BIN_832	0.541548	chr1:173750400-173750800
chr1:173804763-173805695	AluSx_SINE_Alu,AluSx1_SINE_Alu,AluSx_SINE_Alu,AluSq2_SINE_Alu	BIN_833	0.461012	chr1:173804800-173805200
chr1:173934997-173935286	AluJb_SINE_Alu	BIN_836	0.47041	chr1:173935200-173935600
chr1:174398597-174398905	AluSq2_SINE_Alu	BIN_840	0.473114	chr1:174398400-174398800
chr1:174825253-174825561	AluSg7_SINE_Alu	BIN_844	0.494699	chr1:174825200-174825600
chr1:176797857-176798179	AluSx_SINE_Alu	BIN_857	0.448236	chr1:176797600-176798000
chr1:176907968-176908264	AluSz_SINE_Alu	BIN_858	0.449107	chr1:176908000-176908400
chr1:176950065-176950377	AluSx1_SINE_Alu	BIN_859	0.592042	chr1:176950000-176950400
chr1:177287070-177287359	AluJb_SINE_Alu	BIN_862	0.416567	chr1:177287200-177287600
chr1:178092841-178093107	AluJb_SINE_Alu	BIN_867	0.552962	chr1:178092800-178093200
chr1:178429940-178430248	AluSx1_SINE_Alu	BIN_871	0.441996	chr1:178430000-178430400
chr1:179026198-179026493	AluSz_SINE_Alu	BIN_872	0.414665	chr1:179026000-179026400
chr1:179173152-179173460	AluSx_SINE_Alu	BIN_873	0.423132	chr1:179173200-179173600
chr1:179377515-179378084	AluSz_SINE_Alu,AluJb_SINE_Alu	BIN_874	0.497073	chr1:179377600-179378000
chr1:179761285-179761418	AluJb_SINE_Alu	BIN_875	0.471834	chr1:179761200-179761600
chr1:180355022-180355320	AluSz_SINE_Alu	BIN_877	0.434412	chr1:180354800-180355200
chr1:181137368-181137644	AluSz6_SINE_Alu	BIN_882	0.439949	chr1:181137200-181137600
chr1:181324441-181324770	AluSz_SINE_Alu	BIN_883	0.449518	chr1:181324400-181324800
chr1:182425434-182425732	AluSp_SINE_Alu	BIN_884	0.48366	chr1:182425600-182426000
chr1:183205377-183205544	AluJb_SINE_Alu	BIN_887	0.529286	chr1:183205200-183205600
chr1:183300913-183301217	AluSx1_SINE_Alu	BIN_888	0.457499	chr1:183300800-183301200
chr1:183424301-183424592	AluSx1_SINE_Alu	BIN_890	0.44496	chr1:183424400-183424800
chr1:183784123-183784421	AluSz_SINE_Alu	BIN_893	0.481665	chr1:183784000-183784400
chr1:184981017-184981318	AluSz_SINE_Alu	BIN_896	0.449107	chr1:184981200-184981600
chr1:185044132-185044416	AluSx1_SINE_Alu	BIN_897	0.547299	chr1:185044000-185044400
chr1:185536997-185537312	AluSz_SINE_Alu	BIN_899	0.443892	chr1:185536800-185537200
chr1:185746578-185746876	AluSc_SINE_Alu	BIN_900	0.423589	chr1:185746800-185747200
chr1:185927224-185927543	AluJb_SINE_Alu	BIN_901	0.487468	chr1:185927200-185927600
chr1:186568860-186568982	AluJo_SINE_Alu	BIN_908	0.414665	chr1:186568800-186569200
chr1:186591763-186592051	AluY_SINE_Alu	BIN_909	0.425492	chr1:186591600-186592000
chr1:187043513-187043619	AluY_SINE_Alu	BIN_910	0.426395	chr1:187043600-187044000
chr1:187145740-187146044	AluJo_SINE_Alu	BIN_911	0.413678	chr1:187145600-187146000
chr1:187172187-187172607	AluSx1_SINE_Alu,AluJr_SINE_Alu	BIN_912	0.453813	chr1:187172000-187172400
chr1:188082862-188083110	AluSc8_SINE_Alu	BIN_913	0.463182	chr1:188082800-188083200
chr1:188870547-188870822	AluY_SINE_Alu	BIN_916	0.454089	chr1:188870800-188871200
chr1:191200930-191201234	AluSg_SINE_Alu	BIN_924	0.473974	chr1:191200800-191201200
chr1:192125439-192125751	AluSg7_SINE_Alu	BIN_927	0.580314	chr1:192125600-192126000
chr1:193393210-193393524	AluSz_SINE_Alu	BIN_930	0.526419	chr1:193393200-193393600
chr1:194281507-194281797	AluY_SINE_Alu	BIN_935	0.453813	chr1:194281600-194282000
chr1:194712339-194712645	AluSq2_SINE_Alu	BIN_937	0.439949	chr1:194712400-194712800
chr1:195644714-195645018	AluSx_SINE_Alu	BIN_939	0.449518	chr1:195644800-195645200
chr1:198537519-198537829	AluSx1_SINE_Alu	BIN_956	0.425492	chr1:198537600-198538000
chr1:199067412-199067717	AluSg4_SINE_Alu	BIN_961	0.507213	chr1:199067600-199068000
chr1:199841112-199841403	AluSp_SINE_Alu	BIN_963	0.443237	chr1:199840800-199841200
chr1:200068714-200069019	AluSc8_SINE_Alu	BIN_964	0.415394	chr1:200068800-200069200
chr1:200323746-200324039	AluJb_SINE_Alu	BIN_965	0.429886	chr1:200323600-200324000
chr1:200330831-200331134	AluJr_SINE_Alu	BIN_966	0.54209	chr1:200330800-200331200
chr1:200625899-200626032	AluJo_SINE_Alu	BIN_967	0.463913	chr1:200625600-200626000
chr1:200823118-200823409	AluJb_SINE_Alu	BIN_968	0.440713	chr1:200823200-200823600
chr1:201015280-201015606	AluSz_SINE_Alu	BIN_969	0.489181	chr1:201015200-201015600
chr1:201272301-201272554	AluJo_SINE_Alu	BIN_971	0.489181	chr1:201272400-201272800
chr1:201822373-201823300	AluJo_SINE_Alu,AluJb_SINE_Alu,AluSc_SINE_Alu,AluJb_SINE_Alu	BIN_973	0.517933	chr1:201822400-201822800
chr1:201942234-201942747	AluSz_SINE_Alu,AluY_SINE_Alu	BIN_974	0.415394	chr1:201942400-201942800
chr1:202410980-202411275	AluSz_SINE_Alu	BIN_976	0.449325	chr1:202410800-202411200
chr1:203063176-203063472	AluJb_SINE_Alu	BIN_977	0.431304	chr1:203063200-203063600
chr1:203268883-203269229	AluSx_SINE_Alu,AluSx_SINE_Alu	BIN_979	0.470704	chr1:203268800-203269200
chr1:203340927-203341582	AluSx3_SINE_Alu,AluSx_SINE_Alu,AluSx1_SINE_Alu	BIN_980	0.424819	chr1:203340800-203341200
chr1:203354172-203354658	AluSz_SINE_Alu,AluSp_SINE_Alu	BIN_981	0.413056	chr1:203354000-203354400
chr1:203451398-203452023	AluSq_SINE_Alu,AluY_SINE_Alu	BIN_982	0.443237	chr1:203452000-203452400
chr1:203756714-203756942	AluJo_SINE_Alu	BIN_983	0.48017	chr1:203756800-203757200
chr1:203906147-203906756	AluSx_SINE_Alu,AluJb_SINE_Alu	BIN_984	0.449325	chr1:203906000-203906400
chr1:204102647-204102958	AluY_SINE_Alu	BIN_985	0.491924	chr1:204102800-204103200
chr1:204399478-204400081	AluSg_SINE_Alu,AluSx_SINE_Alu	BIN_986	0.432191	chr1:204399600-204400000
chr1:204726619-204726905	AluSx_SINE_Alu	BIN_987	0.44857	chr1:204726400-204726800
chr1:205039842-205040142	AluSx_SINE_Alu	BIN_989	0.410405	chr1:205040000-205040400
chr1:205456119-205456424	AluSx1_SINE_Alu	BIN_990	0.413056	chr1:205456000-205456400
chr1:205730556-205731185	AluJo_SINE_Alu,AluSq_SINE_Alu	BIN_991	0.586382	chr1:205730800-205731200
chr1:205738554-205738856	AluSz6_SINE_Alu	BIN_992	0.481665	chr1:205738400-205738800
chr1:205802980-205803584	AluSz_SINE_Alu,AluSx_SINE_Alu	BIN_993	0.50314	chr1:205802800-205803200
chr1:206260211-206260519	AluJb_SINE_Alu,AluJb_SINE_Alu	BIN_994	0.431567	chr1:206260000-206260400
chr1:206309696-206309983	AluSz6_SINE_Alu	BIN_995	0.516718	chr1:206309600-206310000
chr1:206770884-206771323	AluSx_SINE_Alu,AluSq2_SINE_Alu	BIN_996	0.527222	chr1:206770800-206771200
chr1:207407469-207407752	AluSc8_SINE_Alu	BIN_998	0.421227	chr1:207407600-207408000
chr1:207805851-207806170	AluY_SINE_Alu	BIN_1000	0.529286	chr1:207806000-207806400
chr1:209939926-209940233	AluSz6_SINE_Alu	BIN_1003	0.419211	chr1:209940000-209940400
chr1:210101419-210102035	AluSx_SINE_Alu,AluSc_SINE_Alu	BIN_1008	0.474577	chr1:210101200-210101600
chr1:210627615-210627905	AluY_SINE_Alu	BIN_1026	0.410481	chr1:210627600-210628000
chr1:211964815-211965115	AluSz6_SINE_Alu	BIN_1098	0.421098	chr1:211964800-211965200
chr1:212216835-212217435	AluSx_SINE_Alu,AluSz_SINE_Alu,AluSx_SINE_Alu	BIN_1126	0.464862	chr1:212216800-212217200
chr1:212222244-212222564	AluSz6_SINE_Alu	BIN_1127	0.428265	chr1:212222400-212222800
chr1:212313498-212313795	AluSx_SINE_Alu	BIN_1141	0.432191	chr1:212313600-212314000
chr1:212481752-212482049	AluSx1_SINE_Alu	BIN_1160	0.410405	chr1:212482000-212482400
chr1:212616081-212616382	AluSg7_SINE_Alu	BIN_1171	0.411676	chr1:212616000-212616400
chr1:212639352-212639645	AluSx_SINE_Alu	BIN_1174	0.463913	chr1:212639200-212639600
chr1:212754103-212754410	AluSx1_SINE_Alu	BIN_1177	0.458431	chr1:212754000-212754400
chr1:213032777-213033062	AluSx1_SINE_Alu	BIN_1184	0.580314	chr1:213032800-213033200
chr1:213713454-213713993	AluJr4_SINE_Alu,AluJb_SINE_Alu	BIN_1199	0.413056	chr1:213713600-213714000
chr1:213828382-213828685	AluSz6_SINE_Alu	BIN_1201	0.54763	chr1:213828400-213828800
chr1:214764585-214764877	AluSx_SINE_Alu	BIN_1204	0.573349	chr1:214764400-214764800
chr1:217543807-217544106	AluSp_SINE_Alu	BIN_1210	0.411895	chr1:217544000-217544400
chr1:218722639-218722984	AluSx_SINE_Alu,AluSx_SINE_Alu	BIN_1214	0.463913	chr1:218722800-218723200
chr1:219028134-219028471	AluSx1_SINE_Alu	BIN_1215	0.5333	chr1:219028400-219028800
chr1:220110874-220111159	AluSz6_SINE_Alu	BIN_1222	0.482853	chr1:220110800-220111200
chr1:220730635-220730921	AluSz_SINE_Alu	BIN_1223	0.48017	chr1:220730800-220731200
chr1:220897486-220897794	AluSx_SINE_Alu	BIN_1224	0.453893	chr1:220897600-220898000
chr1:221977052-221977330	AluJb_SINE_Alu	BIN_1231	0.449107	chr1:221977200-221977600
chr1:222932364-222932658	AluJb_SINE_Alu	BIN_1233	0.552962	chr1:222932400-222932800
chr1:223054529-223054837	AluSp_SINE_Alu	BIN_1235	0.426395	chr1:223054800-223055200
chr1:223214096-223214406	AluSz_SINE_Alu	BIN_1236	0.431304	chr1:223214000-223214400
chr1:223849867-223850180	AluSx1_SINE_Alu	BIN_1239	0.436925	chr1:223849600-223850000
chr1:224029604-224029938	AluSg_SINE_Alu	BIN_1240	0.446148	chr1:224029600-224030000
chr1:225664587-225664896	AluSz6_SINE_Alu	BIN_1249	0.417083	chr1:225664400-225664800
chr1:225806963-225807263	AluSz_SINE_Alu	BIN_1250	0.55514	chr1:225807200-225807600
chr1:225847240-225847548	AluSc_SINE_Alu	BIN_1251	0.505279	chr1:225847200-225847600
chr1:226020691-226020858	FAM_SINE_Alu	BIN_1252	0.471834	chr1:226020800-226021200
chr1:226121161-226121464	AluSx_SINE_Alu	BIN_1254	0.453743	chr1:226121200-226121600
chr1:226593000-226593306	AluJb_SINE_Alu	BIN_1257	0.471834	chr1:226593200-226593600
chr1:227065768-227066059	AluSx1_SINE_Alu	BIN_1260	0.560833	chr1:227066000-227066400
chr1:227155772-227156044	AluSx_SINE_Alu	BIN_1262	0.497527	chr1:227155600-227156000
chr1:228019293-228019581	AluSc8_SINE_Alu	BIN_1266	0.48366	chr1:228019200-228019600
chr1:228416960-228417263	AluJr_SINE_Alu	BIN_1268	0.429886	chr1:228417200-228417600
chr1:228794844-228795150	AluSp_SINE_Alu	BIN_1272	0.478356	chr1:228794800-228795200
chr1:229578450-229579085	AluSx1_SINE_Alu,AluJo_SINE_Alu	BIN_1274	0.419211	chr1:229578400-229578800
chr1:229634636-229634946	AluJr_SINE_Alu	BIN_1276	0.418849	chr1:229634800-229635200
chr1:230017526-230017809	AluSz6_SINE_Alu	BIN_1278	0.439949	chr1:230017600-230018000
chr1:230055426-230055755	AluSx_SINE_Alu	BIN_1279	0.416567	chr1:230055600-230056000
chr1:230284326-230284927	AluJo_SINE_Alu,AluJb_SINE_Alu	BIN_1282	0.467123	chr1:230284400-230284800
chr1:231028351-231028658	AluSz6_SINE_Alu	BIN_1284	0.475246	chr1:231028400-231028800
chr1:231286160-231286446	AluJb_SINE_Alu	BIN_1285	0.500763	chr1:231286400-231286800
chr1:231357525-231358134	AluJb_SINE_Alu,AluSq_SINE_Alu	BIN_1286	0.50314	chr1:231358000-231358400
chr1:231415202-231415500	AluSc_SINE_Alu	BIN_1288	0.445795	chr1:231415200-231415600
chr1:231548821-231549090	AluSz_SINE_Alu	BIN_1293	0.428638	chr1:231548800-231549200
chr1:231583434-231583724	AluSc8_SINE_Alu	BIN_1294	0.653584	chr1:231583600-231584000
chr1:233410969-233411247	AluSz_SINE_Alu	BIN_1309	0.521065	chr1:233411200-233411600
chr1:234043455-234043771	AluSx_SINE_Alu	BIN_1311	0.453813	chr1:234043600-234044000
chr1:234118113-234118390	AluSp_SINE_Alu	BIN_1312	0.458431	chr1:234118000-234118400
chr1:234235075-234235382	AluSc_SINE_Alu	BIN_1315	0.560051	chr1:234234800-234235200
chr1:234341115-234341209	AluSg7_SINE_Alu	BIN_1316	0.471864	chr1:234341200-234341600
chr1:234465078-234465524	AluSx1_SINE_Alu,AluJb_SINE_Alu	BIN_1317	0.547233	chr1:234465200-234465600
chr1:234526427-234526755	AluSx_SINE_Alu	BIN_1319	0.592042	chr1:234526400-234526800
chr1:235264597-235264842	AluSz_SINE_Alu	BIN_1321	0.425492	chr1:235264400-235264800
chr1:235540968-235541261	AluSg_SINE_Alu	BIN_1322	0.464751	chr1:235541200-235541600
chr1:235633622-235633917	AluJb_SINE_Alu	BIN_1323	0.44496	chr1:235633600-235634000
chr1:236210272-236210440	AluSx3_SINE_Alu	BIN_1324	0.510804	chr1:236210000-236210400
chr1:236257568-236258215	AluJo_SINE_Alu,AluSx_SINE_Alu	BIN_1325	0.437482	chr1:236258000-236258400
chr1:236288594-236288702	AluJb_SINE_Alu	BIN_1326	0.439079	chr1:236288400-236288800
chr1:237679415-237679718	AluSx1_SINE_Alu	BIN_1329	0.46916	chr1:237679600-237680000
chr1:237804827-237805141	AluSz6_SINE_Alu	BIN_1330	0.415394	chr1:237804800-237805200
chr1:238191405-238191704	AluSc5_SINE_Alu	BIN_1332	0.428265	chr1:238191200-238191600
chr1:239673838-239674135	AluSp_SINE_Alu	BIN_1336	0.459279	chr1:239673600-239674000
chr1:239691910-239692218	AluSx_SINE_Alu	BIN_1337	0.436925	chr1:239691600-239692000
chr1:240714638-240714929	AluSg_SINE_Alu	BIN_1346	0.434412	chr1:240714400-240714800
chr1:240859082-240859389	AluY_SINE_Alu	BIN_1348	0.424819	chr1:240859200-240859600
chr1:240866787-240867097	AluSp_SINE_Alu	BIN_1349	0.439011	chr1:240866800-240867200
chr1:240901611-240902229	AluJb_SINE_Alu,AluSz_SINE_Alu,AluJb_SINE_Alu	BIN_1350	0.457774	chr1:240901600-240902000
chr1:242148066-242148659	AluSx_SINE_Alu,AluSp_SINE_Alu,AluSx_SINE_Alu	BIN_1355	0.453813	chr1:242148400-242148800
chr1:242628948-242629231	AluSg7_SINE_Alu	BIN_1357	0.449689	chr1:242628800-242629200
chr1:244440581-244440875	AluSx_SINE_Alu	BIN_1364	0.421227	chr1:244440800-244441200
chr1:244880853-244880975	AluJo_SINE_Alu	BIN_1366	0.547448	chr1:244880800-244881200
chr1:244926646-244926946	AluJb_SINE_Alu	BIN_1367	0.658328	chr1:244926800-244927200
chr1:244994341-244994607	AluSx_SINE_Alu	BIN_1368	0.424819	chr1:244994400-244994800
chr1:245008906-245009202	AluSq2_SINE_Alu	BIN_1369	0.438081	chr1:245009200-245009600
chr1:245073170-245073298	AluSz_SINE_Alu	BIN_1370	0.449107	chr1:245073200-245073600
chr1:245208315-245208606	AluJb_SINE_Alu	BIN_1371	0.431567	chr1:245208400-245208800
chr1:245594490-245595078	AluSx_SINE_Alu,AluSx3_SINE_Alu,AluSx_SINE_Alu	BIN_1372	0.485544	chr1:245594400-245594800
chr1:245600192-245600488	AluSz_SINE_Alu	BIN_1373	0.439079	chr1:245600400-245600800
chr1:245628283-245628577	AluY_SINE_Alu	BIN_1374	0.421227	chr1:245628000-245628400
chr1:245731203-245731828	AluSx_SINE_Alu,AluJo_SINE_Alu	BIN_1377	0.445402	chr1:245731600-245732000
chr1:245763343-245763868	AluY_SINE_Alu,AluJo_SINE_Alu	BIN_1378	0.442477	chr1:245763200-245763600
chr1:246306697-246306970	AluJb_SINE_Alu	BIN_1383	0.594296	chr1:246306800-246307200
chr1:246485061-246485686	AluJo_SINE_Alu,AluSz6_SINE_Alu	BIN_1385	0.611816	chr1:246485200-246485600
chr1:246709345-246709945	AluJo_SINE_Alu,AluSx_SINE_Alu	BIN_1387	0.441391	chr1:246709600-246710000
chr1:246720293-246720603	AluSz_SINE_Alu	BIN_1388	0.44496	chr1:246720400-246720800
chr1:246850664-246850965	AluSg_SINE_Alu	BIN_1390	0.439079	chr1:246850400-246850800
chr1:249165437-249165743	AluY_SINE_Alu	BIN_1404	0.434412	chr1:249165200-249165600
chr2:3385901-3386203	AluSc8_SINE_Alu	BIN_4715	0.425492	chr2:3386000-3386400
chr2:3619652-3619944	AluSx_SINE_Alu,AluSz_SINE_Alu	BIN_4719	0.475246	chr2:3619600-3620000
chr2:4186665-4186952	AluSx1_SINE_Alu	BIN_4734	0.513122	chr2:4186400-4186800
chr2:5775017-5775296	AluSz6_SINE_Alu	BIN_4778	0.431304	chr2:5774800-5775200
chr2:6458472-6458784	AluSp_SINE_Alu	BIN_4798	0.433093	chr2:6458400-6458800
chr2:7054652-7054964	AluSp_SINE_Alu	BIN_4823	0.541086	chr2:7054800-7055200
chr2:7850817-7851108	AluSx1_SINE_Alu	BIN_4841	0.428638	chr2:7850800-7851200
chr2:8812364-8812958	AluJb_SINE_Alu,AluJb_SINE_Alu,AluJb_SINE_Alu	BIN_4857	0.449325	chr2:8812400-8812800
chr2:9213712-9214015	AluSq2_SINE_Alu	BIN_4866	0.417083	chr2:9213600-9214000
chr2:9789735-9790305	AluSg_SINE_Alu,AluSx_SINE_Alu	BIN_4879	0.453625	chr2:9789600-9790000
chr2:9813406-9813703	AluSz_SINE_Alu	BIN_4881	0.481665	chr2:9813600-9814000
chr2:9995109-9995423	AluSq2_SINE_Alu	BIN_4883	0.410481	chr2:9995200-9995600
chr2:10069305-10069586	AluY_SINE_Alu	BIN_4026	0.434412	chr2:10069200-10069600
chr2:10196284-10196587	AluSx3_SINE_Alu	BIN_4034	0.429886	chr2:10196000-10196400
chr2:10290159-10290591	AluSz_SINE_Alu,AluSc8_SINE_Alu	BIN_4036	0.453813	chr2:10290000-10290400
chr2:10453976-10454281	AluSg_SINE_Alu	BIN_4039	0.465725	chr2:10453600-10454000
chr2:10638710-10639017	AluSz_SINE_Alu	BIN_4045	0.488014	chr2:10638800-10639200
chr2:10846510-10846789	AluSx1_SINE_Alu	BIN_4050	0.445402	chr2:10846400-10846800
chr2:11659569-11659881	AluSq2_SINE_Alu	BIN_4079	0.515436	chr2:11659600-11660000
chr2:14663705-14664014	AluSq_SINE_Alu	BIN_4218	0.419328	chr2:14663600-14664000
chr2:15377684-15378198	AluSx_SINE_Alu,AluSx3_SINE_Alu	BIN_4239	0.413678	chr2:15377600-15378000
chr2:16671086-16671358	AluY_SINE_Alu	BIN_4262	0.438081	chr2:16670800-16671200
chr2:17909420-17909828	AluJb_SINE_Alu,FLAM_C_SINE_Alu	BIN_4288	0.428265	chr2:17909600-17910000
chr2:18773199-18773496	AluSx_SINE_Alu	BIN_4304	0.432557	chr2:18773200-18773600
chr2:19535867-19536177	AluSx_SINE_Alu	BIN_4325	0.499913	chr2:19536000-19536400
chr2:20446661-20446960	AluJb_SINE_Alu	BIN_4378	0.417083	chr2:20446800-20447200
chr2:20506365-20507007	AluSx1_SINE_Alu,AluSx1_SINE_Alu	BIN_4382	0.449843	chr2:20506400-20506800
chr2:20983472-20983772	AluJb_SINE_Alu	BIN_4394	0.413056	chr2:20983600-20984000
chr2:22042085-22042383	AluSg_SINE_Alu	BIN_4433	0.437482	chr2:22042000-22042400
chr2:22978732-22979022	AluY_SINE_Alu	BIN_4474	0.528409	chr2:22978800-22979200
chr2:23087699-23087991	AluSq2_SINE_Alu	BIN_4487	0.489993	chr2:23087600-23088000
chr2:24102200-24102498	AluJr_SINE_Alu	BIN_4586	0.414665	chr2:24102400-24102800
chr2:24140515-24141246	FLAM_A_SINE_Alu,AluSp_SINE_Alu,AluJo_SINE_Alu	BIN_4593	0.499236	chr2:24140400-24140800
chr2:24142141-24143035	AluJb_SINE_Alu,AluSq2_SINE_Alu,AluSx_SINE_Alu	BIN_4594	0.417083	chr2:24142800-24143200
chr2:24286723-24286995	AluSx_SINE_Alu	BIN_4632	0.499913	chr2:24286800-24287200
chr2:24478215-24479094	AluSx_SINE_Alu,AluSx_SINE_Alu,AluSp_SINE_Alu,AluSx_SINE_Alu	BIN_4643	0.471834	chr2:24478000-24478400
chr2:25367130-25367438	AluSx1_SINE_Alu	BIN_4674	0.508928	chr2:25366800-25367200
chr2:25621927-25622507	AluSc_SINE_Alu,AluSz6_SINE_Alu	BIN_4675	0.438081	chr2:25622400-25622800
chr2:25927025-25927624	AluSc_SINE_Alu,AluSg4_SINE_Alu	BIN_4677	0.553699	chr2:25927200-25927600
chr2:26114182-26114579	AluSx1_SINE_Alu,AluJo_SINE_Alu	BIN_4678	0.425492	chr2:26114000-26114400
chr2:26209611-26210582	AluSq2_SINE_Alu,AluJr_SINE_Alu,AluSx_SINE_Alu	BIN_4679	0.470053	chr2:26210400-26210800
chr2:26488181-26488465	AluSx_SINE_Alu	BIN_4680	0.5149	chr2:26488000-26488400
chr2:26606464-26606753	AluSg_SINE_Alu	BIN_4681	0.419328	chr2:26606400-26606800
chr2:26975985-26976288	AluJo_SINE_Alu	BIN_4684	0.486797	chr2:26976000-26976400
chr2:27112140-27112437	AluY_SINE_Alu	BIN_4686	0.468075	chr2:27112400-27112800
chr2:27254712-27254992	AluJb_SINE_Alu	BIN_4687	0.438081	chr2:27254400-27254800
chr2:27468903-27469213	AluSz_SINE_Alu	BIN_4690	0.431304	chr2:27468800-27469200
chr2:28275142-28275454	AluSz6_SINE_Alu	BIN_4692	0.461973	chr2:28275200-28275600
chr2:28751808-28752110	AluJb_SINE_Alu	BIN_4693	0.44857	chr2:28752000-28752400
chr2:28921142-28921300	AluJr4_SINE_Alu	BIN_4694	0.5045	chr2:28921200-28921600
chr2:29012864-29013159	AluSz6_SINE_Alu	BIN_4695	0.523527	chr2:29012800-29013200
chr2:29525101-29525402	AluSq10_SINE_Alu	BIN_4697	0.527433	chr2:29525200-29525600
chr2:29619259-29619570	AluSg_SINE_Alu	BIN_4698	0.4697	chr2:29619200-29619600
chr2:29641908-29642219	AluSz_SINE_Alu	BIN_4699	0.453813	chr2:29642000-29642400
chr2:30333476-30333785	AluJr4_SINE_Alu	BIN_4700	0.449107	chr2:30333600-30334000
chr2:30892486-30892799	AluSx1_SINE_Alu	BIN_4701	0.442539	chr2:30892400-30892800
chr2:30938623-30938937	AluSq_SINE_Alu	BIN_4702	0.497527	chr2:30938400-30938800
chr2:31494492-31494797	AluSx4_SINE_Alu	BIN_4703	0.41747	chr2:31494400-31494800
chr2:31536301-31536591	AluJo_SINE_Alu	BIN_4704	0.434412	chr2:31536400-31536800
chr2:32259786-32260673	AluSq2_SINE_Alu,AluSx_SINE_Alu,AluJr_SINE_Alu,AluSc_SINE_Alu	BIN_4706	0.470704	chr2:32260400-32260800
chr2:32421848-32422139	AluSq_SINE_Alu	BIN_4707	0.524583	chr2:32422000-32422400
chr2:32572331-32572966	AluJb_SINE_Alu,AluSp_SINE_Alu,AluJb_SINE_Alu	BIN_4708	0.429952	chr2:32572400-32572800
chr2:32854195-32854805	AluSq_SINE_Alu,AluY_SINE_Alu	BIN_4709	0.415953	chr2:32854400-32854800
chr2:32956151-32956716	AluSg_SINE_Alu,AluJb_SINE_Alu	BIN_4710	0.463182	chr2:32956000-32956400
chr2:33058432-33058648	AluSq2_SINE_Alu	BIN_4711	0.439079	chr2:33058400-33058800
chr2:33549766-33550071	AluSc8_SINE_Alu	BIN_4713	0.491924	chr2:33550000-33550400
chr2:33629765-33630066	AluSq10_SINE_Alu	BIN_4714	0.438081	chr2:33630000-33630400
chr2:33935655-33936541	AluSp_SINE_Alu,AluSc_SINE_Alu,AluSq2_SINE_Alu	BIN_4716	0.441996	chr2:33936000-33936400
chr2:34718773-34719082	AluJb_SINE_Alu	BIN_4717	0.427162	chr2:34718800-34719200
chr2:37625670-37625979	AluSc_SINE_Alu	BIN_4720	0.413932	chr2:37625600-37626000
chr2:38116034-38116320	AluSx3_SINE_Alu	BIN_4721	0.413056	chr2:38116000-38116400
chr2:38836558-38836854	AluSx_SINE_Alu	BIN_4723	0.442477	chr2:38836800-38837200
chr2:38943839-38944021	FAM_SINE_Alu	BIN_4724	0.441996	chr2:38944000-38944400
chr2:39041870-39042501	AluSp_SINE_Alu,AluSz_SINE_Alu	BIN_4725	0.440713	chr2:39042000-39042400
chr2:39052450-39052744	AluSx_SINE_Alu	BIN_4726	0.425492	chr2:39052400-39052800
chr2:39166802-39166965	AluJr_SINE_Alu	BIN_4727	0.453984	chr2:39166800-39167200
chr2:39276076-39276357	AluSx_SINE_Alu	BIN_4728	0.515436	chr2:39276000-39276400
chr2:39383639-39384202	AluY_SINE_Alu,AluSx1_SINE_Alu	BIN_4729	0.419058	chr2:39384000-39384400
chr2:39423753-39424047	AluSx_SINE_Alu	BIN_4730	0.474577	chr2:39424000-39424400
chr2:39820369-39820680	AluSz_SINE_Alu	BIN_4732	0.424299	chr2:39820400-39820800
chr2:42679936-42680221	AluSx_SINE_Alu	BIN_4735	0.514035	chr2:42680000-42680400
chr2:42770320-42770925	AluSg_SINE_Alu,AluJr_SINE_Alu	BIN_4736	0.436925	chr2:42770000-42770400
chr2:43977329-43977632	AluSx_SINE_Alu	BIN_4740	0.495111	chr2:43977600-43978000
chr2:44224870-44225159	AluJr_SINE_Alu	BIN_4741	0.489993	chr2:44224800-44225200
chr2:44296398-44296710	AluSx_SINE_Alu	BIN_4742	0.419211	chr2:44296400-44296800
chr2:44452786-44453413	AluSz_SINE_Alu,AluY_SINE_Alu	BIN_4743	0.437482	chr2:44452800-44453200
chr2:44828323-44828602	AluSp_SINE_Alu	BIN_4744	0.429886	chr2:44828400-44828800
chr2:45140145-45140460	AluSx_SINE_Alu	BIN_4745	0.426395	chr2:45140400-45140800
chr2:45894003-45894586	AluJb_SINE_Alu,AluSx_SINE_Alu,AluJb_SINE_Alu	BIN_4748	0.432557	chr2:45894000-45894400
chr2:47135403-47135702	AluJb_SINE_Alu	BIN_4750	0.421398	chr2:47135200-47135600
chr2:47138259-47138566	AluSx_SINE_Alu	BIN_4751	0.411676	chr2:47138400-47138800
chr2:47342791-47343092	AluSx_SINE_Alu	BIN_4753	0.530799	chr2:47342800-47343200
chr2:47431513-47431812	AluJr4_SINE_Alu	BIN_4754	0.497073	chr2:47431600-47432000
chr2:47577803-47578113	AluY_SINE_Alu	BIN_4755	0.421098	chr2:47578000-47578400
chr2:47717434-47717744	AluSx1_SINE_Alu	BIN_4756	0.448857	chr2:47717600-47718000
chr2:47832844-47833156	AluSx1_SINE_Alu	BIN_4757	0.419211	chr2:47832800-47833200
chr2:47942512-47942788	AluSz_SINE_Alu	BIN_4758	0.449325	chr2:47942400-47942800
chr2:47963331-47963636	AluSz_SINE_Alu	BIN_4759	0.419211	chr2:47963200-47963600
chr2:48161788-48162070	AluJb_SINE_Alu	BIN_4760	0.488603	chr2:48162000-48162400
chr2:48644606-48644907	AluJb_SINE_Alu	BIN_4761	0.458431	chr2:48644400-48644800
chr2:48733806-48734103	AluY_SINE_Alu	BIN_4762	0.453984	chr2:48733600-48734000
chr2:48750802-48751083	AluSz_SINE_Alu	BIN_4763	0.468802	chr2:48750800-48751200
chr2:48872797-48873086	AluY_SINE_Alu	BIN_4764	0.425492	chr2:48872800-48873200
chr2:49468338-49468627	AluY_SINE_Alu	BIN_4765	0.519237	chr2:49468400-49468800
chr2:49614339-49614635	AluSq2_SINE_Alu	BIN_4766	0.44446	chr2:49614400-49614800
chr2:50042981-50043217	AluY_SINE_Alu	BIN_4767	0.459279	chr2:50042800-50043200
chr2:50661182-50661519	AluY_SINE_Alu	BIN_4768	0.417083	chr2:50661200-50661600
chr2:52130143-52130440	AluY_SINE_Alu	BIN_4769	0.416567	chr2:52130000-52130400
chr2:53735232-53735519	AluSz_SINE_Alu	BIN_4770	0.411676	chr2:53735200-53735600
chr2:54074371-54074638	AluJb_SINE_Alu	BIN_4771	0.499913	chr2:54074400-54074800
chr2:54231541-54231846	AluY_SINE_Alu	BIN_4772	0.431129	chr2:54231600-54232000
chr2:54286343-54286647	AluSq2_SINE_Alu	BIN_4773	0.432557	chr2:54286400-54286800
chr2:55666283-55666580	AluJr_SINE_Alu	BIN_4774	0.47041	chr2:55666400-55666800
chr2:55695482-55695795	AluSq2_SINE_Alu	BIN_4775	0.438081	chr2:55695600-55696000
chr2:55751390-55751701	AluJo_SINE_Alu	BIN_4776	0.419211	chr2:55751600-55752000
chr2:60596043-60596353	AluSc_SINE_Alu	BIN_4779	0.445795	chr2:60596000-60596400
chr2:60967047-60967434	AluJb_SINE_Alu,AluJb_SINE_Alu	BIN_4780	0.478306	chr2:60967200-60967600
chr2:61234432-61235831	AluJr_SINE_Alu,AluSq2_SINE_Alu,AluY_SINE_Alu,AluJb_SINE_Alu,AluSp_SINE_Alu,AluJb_SINE_Alu	BIN_4781	0.413056	chr2:61235600-61236000
chr2:61422526-61422822	AluSg_SINE_Alu	BIN_4782	0.437482	chr2:61422800-61423200
chr2:61486114-61486434	AluSx_SINE_Alu	BIN_4783	0.458826	chr2:61486400-61486800
chr2:61696062-61696355	AluSq2_SINE_Alu	BIN_4784	0.43367	chr2:61696000-61696400
chr2:61943656-61943949	AluSp_SINE_Alu	BIN_4785	0.437482	chr2:61943600-61944000
chr2:62211173-62211460	AluSx_SINE_Alu	BIN_4786	0.448857	chr2:62211200-62211600
chr2:62297408-62297699	AluJr_SINE_Alu	BIN_4787	0.448857	chr2:62297200-62297600
chr2:62354876-62355490	AluSz_SINE_Alu,AluSz_SINE_Alu	BIN_4788	0.413056	chr2:62354800-62355200
chr2:62602707-62602968	AluSc_SINE_Alu	BIN_4789	0.413056	chr2:62602800-62603200
chr2:62769979-62770286	AluSx_SINE_Alu	BIN_4790	0.570682	chr2:62770000-62770400
chr2:63491492-63491601	AluYk11_SINE_Alu	BIN_4792	0.464751	chr2:63491200-63491600
chr2:64174960-64175259	AluJr_SINE_Alu	BIN_4796	0.428265	chr2:64174800-64175200
chr2:64266717-64267013	AluJb_SINE_Alu	BIN_4797	0.453984	chr2:64266800-64267200
chr2:64622319-64622620	AluSz6_SINE_Alu	BIN_4799	0.530799	chr2:64622400-64622800
chr2:65045395-65045691	AluSx1_SINE_Alu	BIN_4800	0.419058	chr2:65045200-65045600
chr2:65111813-65112434	AluJb_SINE_Alu,AluSz_SINE_Alu,AluJb_SINE_Alu	BIN_4801	0.426395	chr2:65112400-65112800
chr2:65238911-65239522	AluSx1_SINE_Alu,AluY_SINE_Alu	BIN_4802	0.467123	chr2:65238800-65239200
chr2:65263721-65264008	AluSz_SINE_Alu	BIN_4803	0.465533	chr2:65263600-65264000
chr2:65322865-65323475	AluSx_SINE_Alu,AluSx3_SINE_Alu,AluSx_SINE_Alu	BIN_4804	0.501215	chr2:65322800-65323200
chr2:65471799-65472093	AluJb_SINE_Alu	BIN_4805	0.448857	chr2:65471600-65472000
chr2:65614923-65615221	AluSz_SINE_Alu	BIN_4806	0.488603	chr2:65615200-65615600
chr2:65782718-65783011	AluSz_SINE_Alu	BIN_4807	0.425492	chr2:65782800-65783200
chr2:65837098-65837402	AluSz_SINE_Alu	BIN_4808	0.424819	chr2:65837200-65837600
chr2:66835791-66836097	AluSz_SINE_Alu	BIN_4809	0.453893	chr2:66835600-66836000
chr2:68511666-68511970	AluSx1_SINE_Alu	BIN_4813	0.43367	chr2:68511600-68512000
chr2:68533630-68533927	AluSx1_SINE_Alu	BIN_4814	0.522504	chr2:68533600-68534000
chr2:69652367-69652917	AluJb_SINE_Alu,AluSz_SINE_Alu,AluJb_SINE_Alu	BIN_4815	0.497073	chr2:69652400-69652800
chr2:69825638-69825941	AluJo_SINE_Alu	BIN_4816	0.415394	chr2:69825600-69826000
chr2:70156027-70156324	AluSz6_SINE_Alu	BIN_4818	0.464257	chr2:70156000-70156400
chr2:70293057-70293674	AluSz_SINE_Alu,AluSq2_SINE_Alu	BIN_4819	0.458083	chr2:70293600-70294000
chr2:70404886-70405171	AluJb_SINE_Alu	BIN_4820	0.44496	chr2:70404800-70405200
chr2:70423259-70423898	AluSz_SINE_Alu,AluSc_SINE_Alu	BIN_4821	0.478356	chr2:70423200-70423600
chr2:70526721-70527330	AluY_SINE_Alu,AluSq4_SINE_Alu	BIN_4822	0.537696	chr2:70526800-70527200
chr2:70569452-70569758	AluSz6_SINE_Alu	BIN_4824	0.432557	chr2:70569200-70569600
chr2:71080578-71080872	AluSx1_SINE_Alu	BIN_4825	0.428265	chr2:71080400-71080800
chr2:71156536-71156831	AluSg_SINE_Alu	BIN_4826	0.486797	chr2:71156400-71156800
chr2:71398752-71399045	AluJo_SINE_Alu	BIN_4828	0.423132	chr2:71398800-71399200
chr2:73080708-73081013	AluSz_SINE_Alu	BIN_4831	0.458826	chr2:73080800-73081200
chr2:74080568-74080862	AluSg_SINE_Alu	BIN_4833	0.569052	chr2:74080800-74081200
chr2:74631651-74631930	AluJb_SINE_Alu	BIN_4834	0.618135	chr2:74631600-74632000
chr2:75364569-75364882	AluY_SINE_Alu	BIN_4835	0.478356	chr2:75364400-75364800
chr2:76009935-76010225	AluYk4_SINE_Alu	BIN_4836	0.492082	chr2:76010000-76010400
chr2:76989803-76989923	AluJr_SINE_Alu	BIN_4838	0.436925	chr2:76989600-76990000
chr2:77512585-77512886	AluSx_SINE_Alu	BIN_4840	0.463913	chr2:77512400-77512800
chr2:81177326-81177630	AluY_SINE_Alu	BIN_4844	0.476679	chr2:81177200-81177600
chr2:81189842-81190134	AluSz_SINE_Alu	BIN_4845	0.458826	chr2:81190000-81190400
chr2:83213400-83213512	AluSx_SINE_Alu	BIN_4847	0.449107	chr2:83213200-83213600
chr2:85381946-85382236	AluSg_SINE_Alu	BIN_4848	0.496707	chr2:85382000-85382400
chr2:85428041-85428352	AluSx_SINE_Alu	BIN_4849	0.429952	chr2:85428000-85428400
chr2:85513032-85514076	AluSp_SINE_Alu,AluSx_SINE_Alu,AluJb_SINE_Alu,AluSp_SINE_Alu,AluJb_SINE_Alu	BIN_4850	0.488465	chr2:85513600-85514000
chr2:85640420-85640722	AluSq_SINE_Alu	BIN_4851	0.492308	chr2:85640400-85640800
chr2:86456721-86457033	AluSp_SINE_Alu	BIN_4852	0.419328	chr2:86456800-86457200
chr2:86994187-86994480	AluSx1_SINE_Alu	BIN_4854	0.453893	chr2:86994000-86994400
chr2:87370622-87370945	AluSx_SINE_Alu	BIN_4855	0.443237	chr2:87370800-87371200
chr2:88375728-88376041	AluY_SINE_Alu	BIN_4858	0.432557	chr2:88375600-88376000
chr2:88679164-88679209	AluSx_SINE_Alu	BIN_4859	0.458826	chr2:88679200-88679600
chr2:89411074-89411371	AluSz_SINE_Alu	BIN_4861	0.442477	chr2:89411200-89411600
chr2:89479498-89479795	AluSc_SINE_Alu	BIN_4862	0.443892	chr2:89479600-89480000
chr2:95340657-95340962	AluSx_SINE_Alu	BIN_4868	0.523527	chr2:95340800-95341200
chr2:95596209-95596498	AluSc5_SINE_Alu	BIN_4870	0.453893	chr2:95596000-95596400
chr2:95751660-95751959	AluJr_SINE_Alu	BIN_4871	0.410405	chr2:95751600-95752000
chr2:96853413-96854986	AluSx_SINE_Alu,AluSz_SINE_Alu,AluSp_SINE_Alu,AluSq_SINE_Alu,AluJb_SINE_Alu	BIN_4873	0.471834	chr2:96854800-96855200
chr2:96923369-96923660	AluSx3_SINE_Alu	BIN_4874	0.459279	chr2:96923600-96924000
chr2:97076249-97076565	AluSx_SINE_Alu	BIN_4875	0.489632	chr2:97076400-97076800
chr2:97453313-97453603	AluJb_SINE_Alu	BIN_4876	0.465533	chr2:97453600-97454000
chr2:97787095-97787402	AluSc8_SINE_Alu	BIN_4877	0.439949	chr2:97787200-97787600
chr2:99905049-99905334	AluSx1_SINE_Alu	BIN_4882	0.426395	chr2:99904800-99905200
chr2:100766190-100766473	AluJb_SINE_Alu	BIN_4027	0.419058	chr2:100766000-100766400
chr2:100993101-100993411	AluSz_SINE_Alu	BIN_4028	0.489993	chr2:100993200-100993600
chr2:101425423-101425724	AluSz_SINE_Alu	BIN_4029	0.411895	chr2:101425600-101426000
chr2:101475446-101475732	AluSz_SINE_Alu	BIN_4031	0.453813	chr2:101475600-101476000
chr2:101799380-101799989	AluY_SINE_Alu,AluSq2_SINE_Alu	BIN_4032	0.497527	chr2:101799200-101799600
chr2:101904692-101904980	AluSg_SINE_Alu	BIN_4033	0.435565	chr2:101904800-101905200
chr2:104069677-104069970	AluY_SINE_Alu	BIN_4037	0.425492	chr2:104069600-104070000
chr2:105151258-105151565	AluSq_SINE_Alu	BIN_4040	0.453743	chr2:105151200-105151600
chr2:105221464-105221775	AluSx1_SINE_Alu	BIN_4041	0.411895	chr2:105221200-105221600
chr2:105817346-105817635	AluJr_SINE_Alu	BIN_4043	0.554605	chr2:105817200-105817600
chr2:105917398-105917702	AluSx1_SINE_Alu	BIN_4044	0.467123	chr2:105917600-105918000
chr2:106647749-106648041	AluJb_SINE_Alu	BIN_4046	0.423589	chr2:106647600-106648000
chr2:107106843-107107003	FAM_SINE_Alu	BIN_4047	0.471864	chr2:107106800-107107200
chr2:108086355-108086383	AluJb_SINE_Alu	BIN_4048	0.48366	chr2:108086000-108086400
chr2:109571134-109571439	AluSx1_SINE_Alu	BIN_4051	0.449518	chr2:109571200-109571600
chr2:109571921-109572510	AluSx_SINE_Alu,AluY_SINE_Alu	BIN_4052	0.547233	chr2:109572000-109572400
chr2:109644443-109644749	AluJb_SINE_Alu	BIN_4053	0.427162	chr2:109644400-109644800
chr2:110416221-110416979	AluSx3_SINE_Alu,AluSg_SINE_Alu,AluSz_SINE_Alu	BIN_4055	0.446467	chr2:110416400-110416800
chr2:110455435-110455734	AluSx_SINE_Alu	BIN_4056	0.44496	chr2:110455600-110456000
chr2:110473812-110474425	AluSg4_SINE_Alu,AluSz6_SINE_Alu	BIN_4057	0.569533	chr2:110474000-110474400
chr2:112647080-112647388	AluSq10_SINE_Alu	BIN_4065	0.44857	chr2:112646800-112647200
chr2:112689026-112689284	AluSc_SINE_Alu	BIN_4066	0.421398	chr2:112688800-112689200
chr2:113002948-113003235	AluSz_SINE_Alu	BIN_4067	0.424214	chr2:113003200-113003600
chr2:113383770-113384074	AluSx1_SINE_Alu	BIN_4069	0.494699	chr2:113383600-113384000
chr2:113419876-113420175	AluSx3_SINE_Alu	BIN_4070	0.411895	chr2:113419600-113420000
chr2:113423445-113423733	AluSq2_SINE_Alu	BIN_4071	0.498104	chr2:113423200-113423600
chr2:113496784-113497006	AluJr_SINE_Alu	BIN_4072	0.425492	chr2:113496800-113497200
chr2:113918866-113919176	AluSp_SINE_Alu	BIN_4073	0.43658	chr2:113918800-113919200
chr2:114624457-114624767	AluSx1_SINE_Alu	BIN_4074	0.467123	chr2:114624400-114624800
chr2:118569461-118569771	AluSp_SINE_Alu	BIN_4081	0.425492	chr2:118569200-118569600
chr2:120070321-120070620	AluY_SINE_Alu	BIN_4086	0.425492	chr2:120070400-120070800
chr2:120907468-120907772	AluJo_SINE_Alu	BIN_4090	0.417083	chr2:120907600-120908000
chr2:121033894-121034199	AluSz_SINE_Alu	BIN_4091	0.482853	chr2:121034000-121034400
chr2:121096977-121097244	AluSx_SINE_Alu,AluSx_SINE_Alu	BIN_4092	0.413678	chr2:121097200-121097600
chr2:121236852-121237472	AluSx_SINE_Alu,AluSq2_SINE_Alu	BIN_4093	0.465725	chr2:121237200-121237600
chr2:121510651-121510971	AluSx1_SINE_Alu	BIN_4094	0.457774	chr2:121510800-121511200
chr2:122152175-122152479	AluSg_SINE_Alu	BIN_4097	0.494699	chr2:122152000-122152400
chr2:123158965-123159266	AluSx_SINE_Alu	BIN_4101	0.512498	chr2:123158800-123159200
chr2:123749284-123749598	AluSx1_SINE_Alu	BIN_4104	0.44446	chr2:123749200-123749600
chr2:125608659-125608947	AluSq_SINE_Alu	BIN_4107	0.535217	chr2:125608800-125609200
chr2:125612744-125613049	AluSp_SINE_Alu	BIN_4108	0.431304	chr2:125612800-125613200
chr2:127272048-127272340	AluSx3_SINE_Alu	BIN_4112	0.449107	chr2:127272000-127272400
chr2:127435515-127435825	AluSc8_SINE_Alu	BIN_4114	0.547448	chr2:127435200-127435600
chr2:128349686-128349998	AluSz_SINE_Alu	BIN_4116	0.437482	chr2:128349600-128350000
chr2:128665133-128665250	AluJo_SINE_Alu	BIN_4118	0.491924	chr2:128665200-128665600
chr2:128728512-128729160	AluJb_SINE_Alu,AluY_SINE_Alu	BIN_4119	0.541926	chr2:128728800-128729200
chr2:128950836-128951132	AluSx1_SINE_Alu	BIN_4121	0.510575	chr2:128950800-128951200
chr2:131075878-131076189	AluY_SINE_Alu	BIN_4123	0.425492	chr2:131076000-131076400
chr2:131574149-131574445	AluY_SINE_Alu	BIN_4125	0.443237	chr2:131574400-131574800
chr2:131690508-131690803	AluSz_SINE_Alu	BIN_4126	0.468075	chr2:131690400-131690800
chr2:131693358-131693649	AluSq2_SINE_Alu	BIN_4127	0.421227	chr2:131693200-131693600
chr2:131848166-131849248	AluJo_SINE_Alu,AluY_SINE_Alu,AluSz_SINE_Alu,AluSx_SINE_Alu	BIN_4128	0.429952	chr2:131848400-131848800
chr2:131881102-131881717	AluSg_SINE_Alu,AluJb_SINE_Alu	BIN_4129	0.462541	chr2:131881200-131881600
chr2:131925052-131925334	AluSx1_SINE_Alu	BIN_4130	0.414665	chr2:131924800-131925200
chr2:132440652-132440955	AluSx_SINE_Alu	BIN_4132	0.471864	chr2:132440400-132440800
chr2:133066187-133066492	AluSx1_SINE_Alu	BIN_4136	0.415394	chr2:133066400-133066800
chr2:133575966-133576252	AluSx_SINE_Alu	BIN_4141	0.458083	chr2:133576000-133576400
chr2:134746777-134747080	AluSz_SINE_Alu	BIN_4148	0.415394	chr2:134746800-134747200
chr2:135265154-135265426	AluJr_SINE_Alu	BIN_4154	0.421227	chr2:135265200-135265600
chr2:135287037-135287346	AluSx_SINE_Alu	BIN_4155	0.423589	chr2:135287200-135287600
chr2:135605408-135605720	AluSp_SINE_Alu	BIN_4158	0.453984	chr2:135605600-135606000
chr2:135980398-135980846	AluJo_SINE_Alu,AluSg4_SINE_Alu	BIN_4160	0.525542	chr2:135980400-135980800
chr2:136233365-136233669	AluSx1_SINE_Alu	BIN_4163	0.425492	chr2:136233200-136233600
chr2:136387642-136387878	AluSp_SINE_Alu	BIN_4165	0.555498	chr2:136387600-136388000
chr2:136412039-136412318	AluSx_SINE_Alu	BIN_4166	0.461467	chr2:136412000-136412400
chr2:136476893-136477066	AluSx1_SINE_Alu	BIN_4167	0.459804	chr2:136476800-136477200
chr2:141963869-141964172	AluY_SINE_Alu	BIN_4183	0.438081	chr2:141963600-141964000
chr2:141985492-141985772	AluSq2_SINE_Alu	BIN_4184	0.414665	chr2:141985600-141986000
chr2:142015773-142016067	AluSc_SINE_Alu	BIN_4185	0.453893	chr2:142015600-142016000
chr2:142032995-142033301	AluJb_SINE_Alu	BIN_4186	0.494699	chr2:142032800-142033200
chr2:142340396-142340704	AluY_SINE_Alu	BIN_4187	0.421227	chr2:142340400-142340800
chr2:143207730-143208032	AluSc8_SINE_Alu	BIN_4192	0.414665	chr2:143207600-143208000
chr2:143717509-143717753	AluSz_SINE_Alu	BIN_4196	0.421398	chr2:143717200-143717600
chr2:143789011-143789309	AluJb_SINE_Alu	BIN_4197	0.443892	chr2:143789200-143789600
chr2:144308727-144309023	AluJb_SINE_Alu	BIN_4200	0.433093	chr2:144308800-144309200
chr2:145333752-145334052	AluJb_SINE_Alu	BIN_4208	0.423589	chr2:145333600-145334000
chr2:146224628-146224926	AluSx_SINE_Alu	BIN_4214	0.421398	chr2:146224400-146224800
chr2:146401833-146402131	AluSx1_SINE_Alu	BIN_4216	0.411895	chr2:146402000-146402400
chr2:146438665-146439051	AluSp_SINE_Alu,AluSp_SINE_Alu	BIN_4217	0.494556	chr2:146438800-146439200
chr2:146819735-146820027	AluY_SINE_Alu	BIN_4221	0.413678	chr2:146820000-146820400
chr2:148180444-148180754	AluSq_SINE_Alu	BIN_4225	0.494699	chr2:148180400-148180800
chr2:149057629-149057919	AluSq_SINE_Alu	BIN_4226	0.466282	chr2:149057600-149058000
chr2:149594584-149594895	AluSq2_SINE_Alu	BIN_4229	0.442477	chr2:149594800-149595200
chr2:149659890-149660185	AluSz_SINE_Alu	BIN_4230	0.41747	chr2:149660000-149660400
chr2:150053745-150054040	AluSc_SINE_Alu	BIN_4231	0.439949	chr2:150053600-150054000
chr2:151638003-151638301	AluSg_SINE_Alu	BIN_4232	0.445402	chr2:151638000-151638400
chr2:151772449-151772745	AluSg_SINE_Alu	BIN_4233	0.419211	chr2:151772400-151772800
chr2:152530246-152530471	AluYc_SINE_Alu	BIN_4234	0.511125	chr2:152530400-152530800
chr2:152862906-152863209	AluSz6_SINE_Alu	BIN_4235	0.448857	chr2:152863200-152863600
chr2:153223197-153223508	AluJb_SINE_Alu	BIN_4236	0.463913	chr2:153223200-153223600
chr2:153420954-153421264	AluSz_SINE_Alu	BIN_4237	0.576927	chr2:153420800-153421200
chr2:153626622-153626925	AluJb_SINE_Alu	BIN_4238	0.423589	chr2:153626400-153626800
chr2:153873530-153873832	AluSc8_SINE_Alu	BIN_4240	0.453813	chr2:153873600-153874000
chr2:153957260-153957569	AluSz_SINE_Alu	BIN_4241	0.410405	chr2:153957200-153957600
chr2:154410576-154410863	AluY_SINE_Alu	BIN_4242	0.459804	chr2:154410800-154411200
chr2:156432722-156433193	AluYf4_SINE_Alu,AluY_SINE_Alu	BIN_4243	0.413056	chr2:156432800-156433200
chr2:156527550-156527821	AluSq_SINE_Alu	BIN_4244	0.434412	chr2:156527600-156528000
chr2:158830450-158830744	AluSz_SINE_Alu	BIN_4247	0.73501	chr2:158830400-158830800
chr2:160027860-160028397	AluJo_SINE_Alu,AluSx1_SINE_Alu	BIN_4250	0.494438	chr2:160028000-160028400
chr2:160208997-160209296	AluJb_SINE_Alu	BIN_4251	0.489181	chr2:160209200-160209600
chr2:160309328-160309637	AluSz_SINE_Alu	BIN_4252	0.487468	chr2:160309200-160309600
chr2:161417244-161417540	AluSc8_SINE_Alu	BIN_4253	0.476679	chr2:161417200-161417600
chr2:161574944-161575206	AluSc_SINE_Alu	BIN_4254	0.489181	chr2:161574800-161575200
chr2:161763797-161764107	AluSz_SINE_Alu	BIN_4256	0.416567	chr2:161764000-161764400
chr2:162131363-162131654	AluSx1_SINE_Alu	BIN_4257	0.445402	chr2:162131200-162131600
chr2:162966343-162966624	AluSp_SINE_Alu	BIN_4258	0.593811	chr2:162966400-162966800
chr2:163161797-163162124	AluSx1_SINE_Alu	BIN_4259	0.425492	chr2:163161600-163162000
chr2:163501669-163501955	AluSc_SINE_Alu	BIN_4260	0.423132	chr2:163501600-163502000
chr2:165438919-165439228	AluSg7_SINE_Alu	BIN_4261	0.50684	chr2:165439200-165439600
chr2:166773386-166773686	AluSx_SINE_Alu	BIN_4263	0.417083	chr2:166773200-166773600
chr2:166817760-166818052	AluY_SINE_Alu	BIN_4264	0.449107	chr2:166817600-166818000
chr2:170434470-170434772	AluSx4_SINE_Alu	BIN_4266	0.570682	chr2:170434400-170434800
chr2:170681888-170682181	AluY_SINE_Alu	BIN_4267	0.410405	chr2:170682000-170682400
chr2:171208448-171208762	AluSx_SINE_Alu	BIN_4269	0.467123	chr2:171208400-171208800
chr2:171235704-171236002	AluSc_SINE_Alu	BIN_4270	0.425492	chr2:171235600-171236000
chr2:171813138-171813414	AluJb_SINE_Alu	BIN_4272	0.411895	chr2:171813200-171813600
chr2:172069702-172070463	AluJb_SINE_Alu,AluJr_SINE_Alu,AluJr_SINE_Alu	BIN_4273	0.449107	chr2:172070400-172070800
chr2:172444364-172444674	AluSz6_SINE_Alu	BIN_4275	0.435565	chr2:172444400-172444800
chr2:172754742-172755052	AluJo_SINE_Alu	BIN_4276	0.507213	chr2:172754800-172755200
chr2:172900549-172900848	AluJr_SINE_Alu	BIN_4277	0.439949	chr2:172900400-172900800
chr2:172918967-172919276	AluSc5_SINE_Alu	BIN_4278	0.421227	chr2:172918800-172919200
chr2:174222646-174223280	AluY_SINE_Alu,AluJo_SINE_Alu	BIN_4279	0.415953	chr2:174222800-174223200
chr2:174304622-174304919	AluJo_SINE_Alu	BIN_4280	0.440713	chr2:174304400-174304800
chr2:174494890-174495201	AluSc8_SINE_Alu	BIN_4281	0.419058	chr2:174495200-174495600
chr2:178000239-178000492	AluSg_SINE_Alu	BIN_4284	0.516495	chr2:178000400-178000800
chr2:178123755-178124039	AluSx_SINE_Alu	BIN_4285	0.569533	chr2:178123600-178124000
chr2:178472840-178473147	AluY_SINE_Alu	BIN_4286	0.4697	chr2:178472800-178473200
chr2:179012830-179013463	AluSx_SINE_Alu,AluSx_SINE_Alu,AluSx_SINE_Alu	BIN_4287	0.428638	chr2:179012800-179013200
chr2:179796610-179796910	AluSz_SINE_Alu	BIN_4289	0.476264	chr2:179796800-179797200
chr2:181774426-181774675	AluSc8_SINE_Alu	BIN_4290	0.427675	chr2:181774400-181774800
chr2:183397403-183397700	AluYc_SINE_Alu	BIN_4294	0.43367	chr2:183397600-183398000
chr2:183548564-183548871	AluSp_SINE_Alu	BIN_4295	0.426395	chr2:183548800-183549200
chr2:183877349-183877650	AluSz_SINE_Alu	BIN_4296	0.414665	chr2:183877600-183878000
chr2:183937829-183938125	AluJb_SINE_Alu	BIN_4297	0.428638	chr2:183938000-183938400
chr2:183954552-183954799	AluSz_SINE_Alu	BIN_4298	0.529286	chr2:183954400-183954800
chr2:184216010-184216176	FRAM_SINE_Alu	BIN_4300	0.428265	chr2:184216000-184216400
chr2:186558705-186558994	AluSc8_SINE_Alu	BIN_4302	0.536198	chr2:186558800-186559200
chr2:187508671-187508970	AluJb_SINE_Alu	BIN_4303	0.410481	chr2:187508800-187509200
chr2:188342831-188343113	AluSq2_SINE_Alu	BIN_4306	0.415394	chr2:188342800-188343200
chr2:188692884-188693185	AluSx1_SINE_Alu	BIN_4307	0.552642	chr2:188692800-188693200
chr2:188985057-188985361	AluYf4_SINE_Alu	BIN_4309	0.448857	chr2:188985200-188985600
chr2:189045120-189045408	AluSz_SINE_Alu	BIN_4310	0.462541	chr2:189045200-189045600
chr2:189127616-189127911	AluSq2_SINE_Alu	BIN_4311	0.475246	chr2:189127600-189128000
chr2:189326045-189326330	AluSp_SINE_Alu	BIN_4313	0.413056	chr2:189326000-189326400
chr2:191584640-191584936	AluSz6_SINE_Alu	BIN_4318	0.479911	chr2:191584800-191585200
chr2:191821815-191822117	AluSx_SINE_Alu	BIN_4319	0.461973	chr2:191821600-191822000
chr2:192614895-192615197	AluSz_SINE_Alu	BIN_4320	0.489993	chr2:192614800-192615200
chr2:193025895-193026177	AluSx1_SINE_Alu	BIN_4321	0.44446	chr2:193026000-193026400
chr2:195298176-195298477	AluY_SINE_Alu	BIN_4324	0.425492	chr2:195298000-195298400
chr2:196302058-196302349	AluSx_SINE_Alu	BIN_4327	0.419058	chr2:196302000-196302400
chr2:196465210-196465527	AluSx_SINE_Alu	BIN_4328	0.445795	chr2:196465200-196465600
chr2:197006101-197006394	AluSx_SINE_Alu	BIN_4331	0.50404	chr2:197006000-197006400
chr2:197271933-197272224	AluJb_SINE_Alu	BIN_4335	0.421227	chr2:197272000-197272400
chr2:197713985-197714297	AluSc8_SINE_Alu	BIN_4337	0.427162	chr2:197714000-197714400
chr2:197891802-197892095	AluJb_SINE_Alu	BIN_4339	0.434412	chr2:197891600-197892000
chr2:198022117-198022421	AluSx_SINE_Alu	BIN_4340	0.411676	chr2:198022000-198022400
chr2:198214852-198215140	AluY_SINE_Alu	BIN_4341	0.429886	chr2:198214800-198215200
chr2:198268920-198269305	AluJo_SINE_Alu,AluSz6_SINE_Alu	BIN_4342	0.492082	chr2:198268800-198269200
chr2:198611343-198611642	AluSc_SINE_Alu	BIN_4344	0.427162	chr2:198611200-198611600
chr2:199162511-199163020	AluJb_SINE_Alu,AluSp_SINE_Alu,AluJb_SINE_Alu	BIN_4345	0.453893	chr2:199162800-199163200
chr2:199498896-199499169	AluSg_SINE_Alu	BIN_4346	0.48366	chr2:199498800-199499200
chr2:201044148-201044451	AluSx1_SINE_Alu	BIN_4348	0.419058	chr2:201044000-201044400
chr2:201214076-201214372	AluSz_SINE_Alu	BIN_4349	0.461973	chr2:201214000-201214400
chr2:201219049-201219344	AluSx1_SINE_Alu	BIN_4350	0.413056	chr2:201219200-201219600
chr2:201394233-201394550	AluSx1_SINE_Alu	BIN_4351	0.429952	chr2:201394400-201394800
chr2:201486469-201486773	AluSx_SINE_Alu	BIN_4352	0.449689	chr2:201486400-201486800
chr2:201784082-201784380	AluSz_SINE_Alu	BIN_4353	0.43367	chr2:201784000-201784400
chr2:201806429-201806938	AluSx1_SINE_Alu,FAM_SINE_Alu	BIN_4354	0.473974	chr2:201806400-201806800
chr2:201812455-201813071	AluJb_SINE_Alu,AluY_SINE_Alu,AluJb_SINE_Alu	BIN_4355	0.431304	chr2:201812400-201812800
chr2:201957663-201957970	AluSx1_SINE_Alu	BIN_4356	0.442539	chr2:201957600-201958000
chr2:201966914-201967220	AluSz_SINE_Alu	BIN_4357	0.492308	chr2:201966800-201967200
chr2:202556228-202556541	AluSz6_SINE_Alu	BIN_4358	0.433093	chr2:202556400-202556800
chr2:202556985-202557284	AluSx1_SINE_Alu	BIN_4359	0.419211	chr2:202557200-202557600
chr2:202714541-202714845	AluSg_SINE_Alu	BIN_4360	0.47041	chr2:202714800-202715200
chr2:202720547-202720850	AluSq2_SINE_Alu	BIN_4361	0.473114	chr2:202720800-202721200
chr2:202770212-202770522	AluSp_SINE_Alu	BIN_4362	0.416567	chr2:202770400-202770800
chr2:202844174-202844808	AluSp_SINE_Alu,AluSc_SINE_Alu	BIN_4363	0.595338	chr2:202844400-202844800
chr2:203065430-203065728	AluSp_SINE_Alu	BIN_4364	0.419058	chr2:203065600-203066000
chr2:203251397-203251703	AluSc8_SINE_Alu	BIN_4365	0.433093	chr2:203251600-203252000
chr2:203306145-203306771	AluY_SINE_Alu,AluSq2_SINE_Alu	BIN_4366	0.416567	chr2:203306000-203306400
chr2:203439747-203439911	AluJb_SINE_Alu	BIN_4367	0.468075	chr2:203439600-203440000
chr2:203447808-203448112	AluY_SINE_Alu	BIN_4368	0.410405	chr2:203447600-203448000
chr2:203448161-203448469	AluSx_SINE_Alu	BIN_4369	0.411895	chr2:203448400-203448800
chr2:203551252-203551541	AluSz_SINE_Alu	BIN_4370	0.652428	chr2:203551200-203551600
chr2:203761130-203761737	AluSx1_SINE_Alu,AluSg4_SINE_Alu	BIN_4371	0.44496	chr2:203761200-203761600
chr2:203839751-203840343	AluSx_SINE_Alu,AluY_SINE_Alu,AluSx_SINE_Alu	BIN_4372	0.414617	chr2:203840000-203840400
chr2:204158999-204159269	AluSp_SINE_Alu	BIN_4373	0.439949	chr2:204159200-204159600
chr2:204166634-204167260	AluSz_SINE_Alu,AluJb_SINE_Alu	BIN_4374	0.44446	chr2:204167200-204167600
chr2:204177219-204177516	AluSg_SINE_Alu	BIN_4375	0.502074	chr2:204177200-204177600
chr2:204328997-204329293	AluSx1_SINE_Alu	BIN_4376	0.425492	chr2:204328800-204329200
chr2:204387834-204388130	AluY_SINE_Alu	BIN_4377	0.535217	chr2:204388000-204388400
chr2:204475626-204476250	AluSg4_SINE_Alu,AluSx1_SINE_Alu	BIN_4379	0.446148	chr2:204475600-204476000
chr2:204570719-204571023	AluSx1_SINE_Alu	BIN_4380	0.424819	chr2:204570800-204571200
chr2:204729843-204730156	AluSq_SINE_Alu	BIN_4381	0.434412	chr2:204730000-204730400
chr2:206742992-206743289	AluJo_SINE_Alu	BIN_4383	0.411895	chr2:206743200-206743600
chr2:206907887-206908509	AluSg_SINE_Alu,AluY_SINE_Alu	BIN_4385	0.412656	chr2:206908000-206908400
chr2:207446611-207446901	AluSq_SINE_Alu	BIN_4386	0.50314	chr2:207446400-207446800
chr2:208105084-208105234	AluJb_SINE_Alu	BIN_4387	0.476264	chr2:208105200-208105600
chr2:208225835-208226078	AluSx1_SINE_Alu	BIN_4388	0.589968	chr2:208225600-208226000
chr2:208379754-208380064	AluJo_SINE_Alu	BIN_4389	0.421227	chr2:208380000-208380400
chr2:208503583-208504013	AluSg_SINE_Alu,FLAM_C_SINE_Alu	BIN_4390	0.419058	chr2:208504000-208504400
chr2:208565002-208565618	AluSq2_SINE_Alu,AluSx3_SINE_Alu	BIN_4391	0.424819	chr2:208565600-208566000
chr2:208755070-208755372	AluSz_SINE_Alu	BIN_4392	0.414665	chr2:208755200-208755600
chr2:210254703-210255229	AluSq2_SINE_Alu,AluY_SINE_Alu	BIN_4396	0.412656	chr2:210254800-210255200
chr2:211115756-211116062	AluSz_SINE_Alu	BIN_4398	0.459279	chr2:211115600-211116000
chr2:213067073-213067365	AluJo_SINE_Alu	BIN_4401	0.51799	chr2:213066800-213067200
chr2:214127313-214127613	AluSx4_SINE_Alu	BIN_4403	0.419328	chr2:214127200-214127600
chr2:214574710-214575025	AluSc8_SINE_Alu	BIN_4404	0.449107	chr2:214574800-214575200
chr2:214873186-214873484	AluSz_SINE_Alu	BIN_4405	0.437482	chr2:214873200-214873600
chr2:216067267-216067564	AluSq_SINE_Alu	BIN_4406	0.457774	chr2:216067200-216067600
chr2:216910618-216910824	AluSx_SINE_Alu	BIN_4408	0.416567	chr2:216910800-216911200
chr2:216966189-216966485	AluSx_SINE_Alu	BIN_4409	0.510575	chr2:216966000-216966400
chr2:217162235-217162503	AluSp_SINE_Alu	BIN_4411	0.439079	chr2:217162000-217162400
chr2:219364506-219365398	AluJb_SINE_Alu,AluSx_SINE_Alu,AluSx3_SINE_Alu,AluSx_SINE_Alu	BIN_4428	0.432557	chr2:219364400-219364800
chr2:219371873-219372180	AluSz_SINE_Alu	BIN_4429	0.463182	chr2:219372000-219372400
chr2:219668157-219668755	AluSc_SINE_Alu,AluSx_SINE_Alu	BIN_4431	0.461973	chr2:219668400-219668800
chr2:219809723-219809878	AluJr_SINE_Alu	BIN_4432	0.429886	chr2:219809600-219810000
chr2:223731540-223731850	AluSg_SINE_Alu	BIN_4441	0.41747	chr2:223731600-223732000
chr2:224127216-224127495	AluSg_SINE_Alu	BIN_4443	0.449518	chr2:224127200-224127600
chr2:224669143-224669448	AluJb_SINE_Alu	BIN_4446	0.411895	chr2:224669200-224669600
chr2:224675029-224675325	AluJb_SINE_Alu	BIN_4447	0.411895	chr2:224674800-224675200
chr2:225632630-225632932	AluSq2_SINE_Alu	BIN_4453	0.428265	chr2:225632800-225633200
chr2:225786535-225786860	AluSx_SINE_Alu,AluSx_SINE_Alu	BIN_4455	0.453893	chr2:225786400-225786800
chr2:226042516-226042820	AluSz_SINE_Alu	BIN_4456	0.427162	chr2:226042400-226042800
chr2:227630880-227631178	AluSz6_SINE_Alu	BIN_4459	0.486797	chr2:227630800-227631200
chr2:228298503-228298814	AluSq_SINE_Alu	BIN_4461	0.413678	chr2:228298800-228299200
chr2:228499688-228499992	AluSc_SINE_Alu	BIN_4464	0.415394	chr2:228499600-228500000
chr2:228564972-228565273	AluSg_SINE_Alu	BIN_4465	0.442477	chr2:228565200-228565600
chr2:228696384-228696681	AluSx3_SINE_Alu	BIN_4468	0.43658	chr2:228696400-228696800
chr2:229443294-229443594	AluSx_SINE_Alu	BIN_4471	0.414665	chr2:229443200-229443600
chr2:230411169-230411465	AluSz6_SINE_Alu	BIN_4481	0.47697	chr2:230411200-230411600
chr2:230741868-230742268	AluJo_SINE_Alu,AluSg4_SINE_Alu	BIN_4483	0.43658	chr2:230742000-230742400
chr2:230773178-230773823	AluYc3_SINE_Alu,AluYk11_SINE_Alu,AluSz6_SINE_Alu	BIN_4484	0.508971	chr2:230773600-230774000
chr2:230796279-230796567	AluSg_SINE_Alu	BIN_4485	0.564611	chr2:230796400-230796800
chr2:231401691-231401983	AluJb_SINE_Alu	BIN_4491	0.424819	chr2:231401600-231402000
chr2:231514720-231515016	AluSx_SINE_Alu	BIN_4494	0.489632	chr2:231514800-231515200
chr2:231573531-231574348	AluSp_SINE_Alu,AluSc8_SINE_Alu,AluSz_SINE_Alu	BIN_4495	0.54209	chr2:231574000-231574400
chr2:231594184-231594473	AluSq_SINE_Alu	BIN_4497	0.427162	chr2:231594000-231594400
chr2:231719405-231719823	AluSx1_SINE_Alu,AluSq2_SINE_Alu	BIN_4499	0.48017	chr2:231719200-231719600
chr2:231929375-231929666	AluSz6_SINE_Alu	BIN_4503	0.453813	chr2:231929200-231929600
chr2:231984303-231984605	AluSx_SINE_Alu	BIN_4505	0.479911	chr2:231984400-231984800
chr2:232098207-232098502	AluSp_SINE_Alu	BIN_4508	0.414665	chr2:232098000-232098400
chr2:232214754-232215037	AluSx1_SINE_Alu	BIN_4509	0.446148	chr2:232214800-232215200
chr2:232223794-232224097	AluSz_SINE_Alu	BIN_4510	0.492082	chr2:232224000-232224400
chr2:232281095-232281718	AluJb_SINE_Alu,AluSx1_SINE_Alu	BIN_4512	0.41747	chr2:232281200-232281600
chr2:232370085-232370909	AluJb_SINE_Alu,AluSz6_SINE_Alu,AluJo_SINE_Alu,FLAM_C_SINE_Alu	BIN_4513	0.476679	chr2:232370000-232370400
chr2:232508190-232508488	AluJo_SINE_Alu	BIN_4515	0.419211	chr2:232508400-232508800
chr2:232682714-232683010	AluSx1_SINE_Alu	BIN_4517	0.434412	chr2:232682800-232683200
chr2:233084707-233084822	AluJb_SINE_Alu	BIN_4521	0.418849	chr2:233084400-233084800
chr2:233467247-233467853	AluJb_SINE_Alu,AluSc8_SINE_Alu,AluJb_SINE_Alu	BIN_4523	0.453743	chr2:233467600-233468000
chr2:234205337-234205811	AluJb_SINE_Alu,AluJb_SINE_Alu	BIN_4526	0.458826	chr2:234205600-234206000
chr2:234981539-234981831	AluSx1_SINE_Alu	BIN_4528	0.453813	chr2:234981600-234982000
chr2:235221343-235221654	AluSx1_SINE_Alu	BIN_4530	0.41747	chr2:235221200-235221600
chr2:236146165-236146466	AluSc_SINE_Alu	BIN_4539	0.594296	chr2:236146000-236146400
chr2:236270079-236270379	AluSx1_SINE_Alu	BIN_4540	0.453813	chr2:236270000-236270400
chr2:236754966-236755274	AluSz_SINE_Alu	BIN_4542	0.536622	chr2:236755200-236755600
chr2:238291426-238291741	AluSx_SINE_Alu,AluSx_SINE_Alu	BIN_4555	0.432557	chr2:238291600-238292000
chr2:238411479-238411791	AluSx1_SINE_Alu	BIN_4558	0.415394	chr2:238411600-238412000
chr2:238833395-238833689	AluSz_SINE_Alu	BIN_4564	0.529286	chr2:238833600-238834000
chr2:238900234-238900445	AluSx1_SINE_Alu	BIN_4565	0.427675	chr2:238900400-238900800
chr2:239109179-239109472	AluJb_SINE_Alu	BIN_4568	0.496707	chr2:239109200-239109600
chr2:239175396-239175712	AluSx_SINE_Alu	BIN_4569	0.521065	chr2:239175600-239176000
chr2:239277319-239277613	AluSq2_SINE_Alu	BIN_4570	0.428265	chr2:239277200-239277600
chr2:239534481-239534775	AluJb_SINE_Alu	BIN_4572	0.410481	chr2:239534400-239534800
chr2:240127751-240128036	AluJb_SINE_Alu	BIN_4577	0.415394	chr2:240127600-240128000
chr2:240549759-240550063	AluSx_SINE_Alu	BIN_4582	0.449107	chr2:240550000-240550400
chr2:241281734-241282037	AluSq2_SINE_Alu	BIN_4589	0.471864	chr2:241282000-241282400
chr2:242064300-242065044	AluY_SINE_Alu,AluSx3_SINE_Alu,AluY_SINE_Alu	BIN_4604	0.420999	chr2:242064400-242064800
chr2:242115861-242116175	AluSq2_SINE_Alu	BIN_4606	0.481204	chr2:242116000-242116400
chr2:242222886-242223188	AluY_SINE_Alu	BIN_4608	0.486797	chr2:242222800-242223200
chr2:242246037-242246320	AluSz6_SINE_Alu	BIN_4609	0.437482	chr2:242246000-242246400
chr2:242267567-242268435	AluSz_SINE_Alu,AluSp_SINE_Alu,AluSp_SINE_Alu	BIN_4610	0.711236	chr2:242267600-242268000
chr2:242272916-242273216	AluY_SINE_Alu	BIN_4611	0.414665	chr2:242273200-242273600
chr2:242341202-242341504	AluSx_SINE_Alu	BIN_4612	0.417083	chr2:242341200-242341600
chr2:242378439-242379043	AluJb_SINE_Alu,AluSc8_SINE_Alu	BIN_4613	0.481665	chr2:242378400-242378800
chr2:242395145-242395367	AluY_SINE_Alu	BIN_4614	0.448857	chr2:242395200-242395600
chr2:242406778-242407073	AluSz_SINE_Alu	BIN_4615	0.473114	chr2:242406800-242407200
chr2:242433008-242433311	AluSz_SINE_Alu	BIN_4616	0.416567	chr2:242433200-242433600
chr2:242441300-242441617	AluSx_SINE_Alu	BIN_4617	0.459804	chr2:242441600-242442000
chr2:242449881-242450542	AluSg_SINE_Alu,AluJb_SINE_Alu	BIN_4618	0.433093	chr2:242450400-242450800
chr2:242462473-242462776	AluSz_SINE_Alu	BIN_4619	0.497073	chr2:242462400-242462800
chr2:242602150-242602677	AluSx_SINE_Alu,AluSz6_SINE_Alu	BIN_4623	0.419058	chr2:242602000-242602400
chr2:242617408-242617702	AluSp_SINE_Alu	BIN_4624	0.512498	chr2:242617200-242617600
chr2:242649033-242650463	AluSz_SINE_Alu,AluSx_SINE_Alu,AluSx_SINE_Alu,AluSx_SINE_Alu,AluSp_SINE_Alu,AluSx_SINE_Alu,AluSx_SINE_Alu	BIN_4626	0.476679	chr2:242649600-242650000
chr2:242679939-242680366	FRAM_SINE_Alu,AluSg_SINE_Alu	BIN_4627	0.537011	chr2:242680000-242680400
chr2:242694016-242694317	AluJr_SINE_Alu	BIN_4628	0.470704	chr2:242694000-242694400
chr2:242825594-242826387	AluY_SINE_Alu,AluJr_SINE_Alu,AluSq_SINE_Alu	BIN_4631	0.581572	chr2:242826000-242826400
chr2:242937916-242938152	AluSz_SINE_Alu	BIN_4633	0.566598	chr2:242937600-242938000
chr3:4441429-4441722	AluSg_SINE_Alu	BIN_5206	0.433093	chr3:4441200-4441600
chr3:4667238-4667540	AluY_SINE_Alu	BIN_5210	0.463182	chr3:4667200-4667600
chr3:4817761-4818053	AluSx4_SINE_Alu	BIN_5224	0.464751	chr3:4818000-4818400
chr3:5380338-5380630	AluSx1_SINE_Alu	BIN_5262	0.423589	chr3:5380400-5380800
chr3:6547874-6548179	AluY_SINE_Alu	BIN_5289	0.431567	chr3:6547600-6548000
chr3:9105188-9105322	FLAM_C_SINE_Alu	BIN_5332	0.433093	chr3:9105200-9105600
chr3:9353852-9354140	AluSx_SINE_Alu	BIN_5333	0.439949	chr3:9354000-9354400
chr3:9617866-9618178	AluSx1_SINE_Alu	BIN_5337	0.419328	chr3:9618000-9618400
chr3:10071484-10072080	AluSx1_SINE_Alu,AluSq_SINE_Alu	BIN_4888	0.424819	chr3:10072000-10072400
chr3:10124628-10124923	AluJb_SINE_Alu	BIN_4891	0.411895	chr3:10124400-10124800
chr3:10293075-10293978	AluSz_SINE_Alu,AluJb_SINE_Alu,AluY_SINE_Alu,AluJb_SINE_Alu	BIN_4898	0.512498	chr3:10293200-10293600
chr3:10423744-10424340	AluJr_SINE_Alu,AluSx1_SINE_Alu	BIN_4900	0.420999	chr3:10424000-10424400
chr3:10874748-10875046	AluSq2_SINE_Alu	BIN_4913	0.41747	chr3:10874800-10875200
chr3:10985098-10985225	AluJb_SINE_Alu	BIN_4916	0.485949	chr3:10984800-10985200
chr3:11088122-11088421	AluSx1_SINE_Alu	BIN_4917	0.414665	chr3:11088400-11088800
chr3:11339469-11339666	AluSc8_SINE_Alu	BIN_4923	0.414665	chr3:11339200-11339600
chr3:11792563-11792865	AluSz_SINE_Alu	BIN_4930	0.459279	chr3:11792800-11793200
chr3:11844465-11844867	AluSz_SINE_Alu,AluSx_SINE_Alu	BIN_4931	0.529286	chr3:11844400-11844800
chr3:12274838-12275162	AluJo_SINE_Alu	BIN_4944	0.497073	chr3:12274800-12275200
chr3:12320555-12321249	AluSp_SINE_Alu,AluSz_SINE_Alu	BIN_4945	0.612387	chr3:12320800-12321200
chr3:13029632-13029943	AluSx1_SINE_Alu	BIN_4966	0.423132	chr3:13029600-13030000
chr3:14765351-14765625	AluSx1_SINE_Alu	BIN_5010	0.488603	chr3:14765600-14766000
chr3:15053733-15054031	AluSq2_SINE_Alu	BIN_5017	0.488603	chr3:15054000-15054400
chr3:15069099-15069666	AluJo_SINE_Alu,AluSx1_SINE_Alu	BIN_5018	0.4697	chr3:15069200-15069600
chr3:15107299-15107586	AluSz_SINE_Alu	BIN_5019	0.531455	chr3:15107200-15107600
chr3:15131110-15131403	AluYc_SINE_Alu	BIN_5020	0.421227	chr3:15131200-15131600
chr3:15413141-15413448	AluSx1_SINE_Alu	BIN_5027	0.464862	chr3:15413200-15413600
chr3:15448176-15448435	AluSx3_SINE_Alu	BIN_5028	0.461973	chr3:15448400-15448800
chr3:15639552-15639827	AluSp_SINE_Alu	BIN_5033	0.432557	chr3:15639600-15640000
chr3:15693553-15693843	AluSx4_SINE_Alu	BIN_5038	0.537368	chr3:15693600-15694000
chr3:15732071-15732376	AluJr_SINE_Alu	BIN_5040	0.425492	chr3:15732000-15732400
chr3:16153599-16153910	AluY_SINE_Alu	BIN_5053	0.440713	chr3:16153600-16154000
chr3:16335705-16336015	AluSq_SINE_Alu	BIN_5055	0.475246	chr3:16335600-16336000
chr3:17342281-17342583	AluSq_SINE_Alu	BIN_5078	0.423589	chr3:17342400-17342800
chr3:19374114-19374423	AluSz_SINE_Alu	BIN_5130	0.463182	chr3:19374000-19374400
chr3:20126988-20127302	AluSz6_SINE_Alu	BIN_5153	0.421098	chr3:20127200-20127600
chr3:20387128-20387430	AluSp_SINE_Alu	BIN_5154	0.415394	chr3:20387200-20387600
chr3:23990574-23990876	AluSx1_SINE_Alu	BIN_5156	0.464751	chr3:23990800-23991200
chr3:24010492-24010808	AluSx_SINE_Alu	BIN_5157	0.441391	chr3:24010400-24010800
chr3:24199015-24199321	AluJr_SINE_Alu	BIN_5158	0.500763	chr3:24198800-24199200
chr3:24287121-24287436	AluSz_SINE_Alu	BIN_5159	0.429784	chr3:24286800-24287200
chr3:25793702-25794009	AluSg_SINE_Alu	BIN_5160	0.423589	chr3:25793600-25794000
chr3:25808502-25808811	AluSg_SINE_Alu	BIN_5161	0.449107	chr3:25808400-25808800
chr3:26610544-26610867	AluSq2_SINE_Alu	BIN_5162	0.419058	chr3:26610400-26610800
chr3:27090659-27090965	AluSx1_SINE_Alu	BIN_5164	0.535731	chr3:27090800-27091200
chr3:27481937-27482559	AluSx_SINE_Alu,AluSq2_SINE_Alu	BIN_5165	0.561592	chr3:27482000-27482400
chr3:27601668-27601958	AluSx1_SINE_Alu	BIN_5166	0.523421	chr3:27601600-27602000
chr3:27687065-27687315	AluSx_SINE_Alu	BIN_5167	0.43658	chr3:27687200-27687600
chr3:31943750-31944318	AluSx1_SINE_Alu,AluY_SINE_Alu	BIN_5171	0.557105	chr3:31944000-31944400
chr3:31970957-31971269	AluY_SINE_Alu	BIN_5172	0.449107	chr3:31971200-31971600
chr3:32387367-32387668	AluSq2_SINE_Alu	BIN_5173	0.476679	chr3:32387200-32387600
chr3:32476613-32476914	AluY_SINE_Alu	BIN_5174	0.443237	chr3:32476800-32477200
chr3:32564689-32564987	AluJb_SINE_Alu	BIN_5175	0.438081	chr3:32564800-32565200
chr3:32729808-32730875	AluSx_SINE_Alu,AluJr_SINE_Alu,AluY_SINE_Alu,AluSq_SINE_Alu	BIN_5176	0.421098	chr3:32730400-32730800
chr3:32804683-32805156	FLAM_C_SINE_Alu,AluSx_SINE_Alu	BIN_5177	0.461467	chr3:32804800-32805200
chr3:32879725-32880014	AluSp_SINE_Alu	BIN_5178	0.417083	chr3:32879600-32880000
chr3:33069005-33069306	AluSz_SINE_Alu	BIN_5179	0.423589	chr3:33068800-33069200
chr3:33092806-33093125	AluSz_SINE_Alu	BIN_5180	0.449518	chr3:33092800-33093200
chr3:33445455-33445917	AluJb_SINE_Alu,AluSc8_SINE_Alu	BIN_5181	0.457499	chr3:33445600-33446000
chr3:33767631-33767945	AluSz_SINE_Alu	BIN_5182	0.489993	chr3:33767600-33768000
chr3:37448844-37449144	AluSx_SINE_Alu	BIN_5184	0.462541	chr3:37448800-37449200
chr3:37844998-37845286	AluSx_SINE_Alu	BIN_5185	0.419058	chr3:37845200-37845600
chr3:37885868-37886168	AluY_SINE_Alu	BIN_5187	0.486797	chr3:37886000-37886400
chr3:38854243-38854545	AluJb_SINE_Alu	BIN_5189	0.489181	chr3:38854400-38854800
chr3:38997457-38997765	AluSg_SINE_Alu	BIN_5190	0.421398	chr3:38997200-38997600
chr3:39072730-39073082	AluSx_SINE_Alu,AluSx_SINE_Alu	BIN_5191	0.429886	chr3:39072800-39073200
chr3:40510272-40510878	AluY_SINE_Alu,AluSz_SINE_Alu	BIN_5192	0.441996	chr3:40510400-40510800
chr3:40567668-40567956	AluSx_SINE_Alu	BIN_5193	0.576927	chr3:40567600-40568000
chr3:40615076-40615374	AluSq2_SINE_Alu	BIN_5194	0.647769	chr3:40615200-40615600
chr3:41333906-41334612	AluSx1_SINE_Alu,AluSg7_SINE_Alu,AluSc_SINE_Alu	BIN_5195	0.468802	chr3:41334000-41334400
chr3:42037248-42038451	AluSc8_SINE_Alu,AluSx3_SINE_Alu,AluSp_SINE_Alu,AluJb_SINE_Alu	BIN_5197	0.484704	chr3:42037200-42037600
chr3:42135203-42135495	AluSz6_SINE_Alu	BIN_5198	0.421227	chr3:42135200-42135600
chr3:42332651-42332884	AluJb_SINE_Alu	BIN_5200	0.527433	chr3:42332400-42332800
chr3:42831742-42832045	AluSz6_SINE_Alu	BIN_5201	0.432557	chr3:42831600-42832000
chr3:43454260-43454568	AluSz_SINE_Alu	BIN_5203	0.414665	chr3:43454400-43454800
chr3:44321829-44322133	AluJb_SINE_Alu	BIN_5205	0.540816	chr3:44322000-44322400
chr3:46897291-46897606	AluSx1_SINE_Alu	BIN_5211	0.568485	chr3:46897200-46897600
chr3:46921957-46922246	AluSz_SINE_Alu	BIN_5212	0.427162	chr3:46922000-46922400
chr3:46952417-46952728	AluSx_SINE_Alu	BIN_5213	0.514035	chr3:46952400-46952800
chr3:47239082-47239778	AluJb_SINE_Alu,AluYc_SINE_Alu,AluSp_SINE_Alu	BIN_5214	0.453743	chr3:47239200-47239600
chr3:47519968-47520553	AluSx_SINE_Alu,AluSz6_SINE_Alu	BIN_5215	0.479726	chr3:47520000-47520400
chr3:47548570-47548874	AluSq2_SINE_Alu	BIN_5216	0.419211	chr3:47548800-47549200
chr3:47571543-47572183	AluJb_SINE_Alu,AluSp_SINE_Alu,AluJb_SINE_Alu	BIN_5217	0.419058	chr3:47572000-47572400
chr3:47725930-47726231	AluSq2_SINE_Alu	BIN_5218	0.494699	chr3:47726000-47726400
chr3:47797066-47797682	AluSx_SINE_Alu,AluSg_SINE_Alu,AluSx_SINE_Alu	BIN_5219	0.505279	chr3:47797200-47797600
chr3:47863104-47863388	AluSx1_SINE_Alu	BIN_5220	0.432557	chr3:47863200-47863600
chr3:47948327-47948623	AluSp_SINE_Alu	BIN_5221	0.411895	chr3:47948400-47948800
chr3:48111976-48112111	AluJr_SINE_Alu	BIN_5222	0.463182	chr3:48112000-48112400
chr3:48162975-48163914	AluSx_SINE_Alu,AluSp_SINE_Alu,AluJo_SINE_Alu	BIN_5223	0.599535	chr3:48162800-48163200
chr3:48190802-48191911	AluSx1_SINE_Alu,AluSq2_SINE_Alu,AluSx1_SINE_Alu,AluJb_SINE_Alu	BIN_5225	0.473974	chr3:48191600-48192000
chr3:48438547-48439007	AluJb_SINE_Alu,AluJb_SINE_Alu	BIN_5226	0.489181	chr3:48438800-48439200
chr3:48513039-48513925	AluSq2_SINE_Alu,AluSz_SINE_Alu,AluSx_SINE_Alu	BIN_5229	0.453681	chr3:48513600-48514000
chr3:48551699-48551996	AluSz_SINE_Alu	BIN_5230	0.432557	chr3:48551600-48552000
chr3:48582157-48582456	AluSz6_SINE_Alu	BIN_5231	0.531455	chr3:48582400-48582800
chr3:48779010-48779313	AluSq2_SINE_Alu	BIN_5232	0.457499	chr3:48779200-48779600
chr3:48804629-48805379	AluSx1_SINE_Alu,AluJr_SINE_Alu,AluSc8_SINE_Alu	BIN_5233	0.445795	chr3:48804800-48805200
chr3:48849920-48850215	AluY_SINE_Alu	BIN_5234	0.578533	chr3:48850000-48850400
chr3:49175882-49177058	AluJr_SINE_Alu,AluSx3_SINE_Alu,AluJb_SINE_Alu,AluY_SINE_Alu	BIN_5236	0.43367	chr3:49176400-49176800
chr3:49233750-49234892	AluJb_SINE_Alu,AluY_SINE_Alu,AluSc8_SINE_Alu,FRAM_SINE_Alu	BIN_5237	0.478393	chr3:49234000-49234400
chr3:49474401-49475281	AluSx3_SINE_Alu,AluSp_SINE_Alu,AluSz6_SINE_Alu	BIN_5239	0.419328	chr3:49474400-49474800
chr3:49487953-49488382	FLAM_C_SINE_Alu,AluSx_SINE_Alu	BIN_5240	0.41747	chr3:49488000-49488400
chr3:49603244-49603557	AluSx_SINE_Alu	BIN_5242	0.517933	chr3:49603200-49603600
chr3:49641522-49641655	FLAM_A_SINE_Alu	BIN_5243	0.418849	chr3:49641600-49642000
chr3:50019695-50020576	AluJb_SINE_Alu,AluSq_SINE_Alu,AluSx1_SINE_Alu,AluJb_SINE_Alu	BIN_5244	0.438081	chr3:50020400-50020800
chr3:50101936-50102404	AluSx_SINE_Alu,AluY_SINE_Alu	BIN_5245	0.482269	chr3:50102000-50102400
chr3:50338765-50339403	AluSx_SINE_Alu,AluY_SINE_Alu	BIN_5246	0.473114	chr3:50339200-50339600
chr3:50439126-50439443	AluSx1_SINE_Alu	BIN_5247	0.431304	chr3:50439200-50439600
chr3:50921518-50921820	AluSx1_SINE_Alu	BIN_5248	0.512498	chr3:50921600-50922000
chr3:51090857-51091150	AluY_SINE_Alu	BIN_5249	0.43367	chr3:51090800-51091200
chr3:51232838-51233148	AluSx_SINE_Alu	BIN_5250	0.411676	chr3:51232800-51233200
chr3:51333910-51334171	AluY_SINE_Alu	BIN_5251	0.432557	chr3:51334000-51334400
chr3:51545367-51546015	AluSp_SINE_Alu,AluJb_SINE_Alu	BIN_5252	0.413056	chr3:51546000-51546400
chr3:51587089-51587390	AluSc_SINE_Alu	BIN_5253	0.479911	chr3:51587200-51587600
chr3:51946066-51946361	AluJr_SINE_Alu	BIN_5255	0.449325	chr3:51946000-51946400
chr3:52370284-52370589	AluJb_SINE_Alu	BIN_5257	0.48366	chr3:52370400-52370800
chr3:53038300-53038587	AluSc_SINE_Alu	BIN_5258	0.442477	chr3:53038400-53038800
chr3:53382218-53383000	AluSq2_SINE_Alu,AluSx1_SINE_Alu,AluSx1_SINE_Alu	BIN_5259	0.581572	chr3:53382800-53383200
chr3:53673878-53674188	AluSx_SINE_Alu	BIN_5261	0.458826	chr3:53674000-53674400
chr3:54731021-54731321	AluJb_SINE_Alu	BIN_5264	0.417083	chr3:54730800-54731200
chr3:55994880-55995155	AluSz6_SINE_Alu	BIN_5265	0.421098	chr3:55994800-55995200
chr3:56738109-56738418	AluY_SINE_Alu	BIN_5266	0.415394	chr3:56738400-56738800
chr3:56801328-56801635	AluY_SINE_Alu	BIN_5267	0.449107	chr3:56801200-56801600
chr3:56937906-56938492	AluJb_SINE_Alu,AluJb_SINE_Alu,AluJb_SINE_Alu	BIN_5268	0.467123	chr3:56938000-56938400
chr3:57183057-57183340	AluSq2_SINE_Alu	BIN_5269	0.50314	chr3:57183200-57183600
chr3:57571389-57571688	AluSx_SINE_Alu	BIN_5271	0.414665	chr3:57571200-57571600
chr3:57819155-57819443	AluSc_SINE_Alu	BIN_5272	0.481665	chr3:57819200-57819600
chr3:58316877-58317505	AluJr_SINE_Alu,AluSx_SINE_Alu	BIN_5274	0.483821	chr3:58317200-58317600
chr3:58450196-58450509	AluJo_SINE_Alu	BIN_5275	0.439079	chr3:58450400-58450800
chr3:58496077-58496389	AluSx_SINE_Alu	BIN_5276	0.541926	chr3:58496000-58496400
chr3:58512982-58513285	AluSc_SINE_Alu	BIN_5277	0.415394	chr3:58513200-58513600
chr3:59166288-59166595	AluJb_SINE_Alu,AluJb_SINE_Alu	BIN_5278	0.433093	chr3:59166000-59166400
chr3:59617725-59618021	AluSg_SINE_Alu	BIN_5280	0.435569	chr3:59618000-59618400
chr3:61368873-61369190	AluY_SINE_Alu	BIN_5281	0.41747	chr3:61368800-61369200
chr3:62004914-62005216	AluSz_SINE_Alu	BIN_5282	0.467123	chr3:62004800-62005200
chr3:62325489-62325817	AluSx_SINE_Alu	BIN_5283	0.471834	chr3:62325600-62326000
chr3:62411823-62412123	AluSc5_SINE_Alu	BIN_5284	0.410405	chr3:62412000-62412400
chr3:62427890-62428192	AluSq2_SINE_Alu	BIN_5285	0.479911	chr3:62428000-62428400
chr3:64470981-64471248	AluSx3_SINE_Alu	BIN_5287	0.510804	chr3:64470800-64471200
chr3:65316885-65317175	AluSz_SINE_Alu	BIN_5288	0.558707	chr3:65316800-65317200
chr3:65783115-65783409	AluJo_SINE_Alu	BIN_5290	0.416567	chr3:65783200-65783600
chr3:65896530-65896832	AluSx_SINE_Alu	BIN_5292	0.500763	chr3:65896800-65897200
chr3:66081945-66082269	AluJr4_SINE_Alu	BIN_5293	0.410405	chr3:66082000-66082400
chr3:66108386-66108679	AluJr_SINE_Alu	BIN_5294	0.481665	chr3:66108400-66108800
chr3:68231074-68231361	AluJb_SINE_Alu	BIN_5297	0.48017	chr3:68231200-68231600
chr3:69117727-69118020	AluSx1_SINE_Alu	BIN_5298	0.474577	chr3:69118000-69118400
chr3:69764938-69765250	AluSx1_SINE_Alu	BIN_5299	0.419058	chr3:69764800-69765200
chr3:71510585-71510975	AluJb_SINE_Alu,AluSg7_SINE_Alu	BIN_5302	0.414665	chr3:71510800-71511200
chr3:71827084-71827387	AluY_SINE_Alu	BIN_5303	0.459804	chr3:71826800-71827200
chr3:72505391-72506009	AluSp_SINE_Alu,AluJb_SINE_Alu	BIN_5304	0.449325	chr3:72505200-72505600
chr3:72556919-72557234	AluJo_SINE_Alu	BIN_5305	0.410405	chr3:72556800-72557200
chr3:73002962-73003550	AluJr_SINE_Alu,AluSc_SINE_Alu	BIN_5306	0.443892	chr3:73002800-73003200
chr3:73097018-73097324	AluSc8_SINE_Alu	BIN_5307	0.537011	chr3:73097200-73097600
chr3:73906376-73906671	AluSx1_SINE_Alu	BIN_5309	0.449325	chr3:73906400-73906800
chr3:74819236-74819560	AluSq_SINE_Alu	BIN_5310	0.415394	chr3:74819200-74819600
chr3:76731569-76731856	AluSg7_SINE_Alu	BIN_5318	0.425492	chr3:76731600-76732000
chr3:77661815-77662129	AluY_SINE_Alu	BIN_5319	0.428265	chr3:77662000-77662400
chr3:77948958-77949269	AluSc8_SINE_Alu	BIN_5320	0.645194	chr3:77948800-77949200
chr3:78261150-78261448	AluSx_SINE_Alu	BIN_5321	0.453813	chr3:78261200-78261600
chr3:79084589-79084892	AluJr_SINE_Alu	BIN_5324	0.453984	chr3:79084400-79084800
chr3:82908986-82909274	AluSc8_SINE_Alu	BIN_5327	0.421398	chr3:82909200-82909600
chr3:87014027-87014331	AluSx3_SINE_Alu	BIN_5329	0.501215	chr3:87014000-87014400
chr3:96189776-96190055	AluY_SINE_Alu	BIN_5338	0.513122	chr3:96189600-96190000
chr3:98274420-98274731	AluSp_SINE_Alu	BIN_5340	0.413932	chr3:98274400-98274800
chr3:98411277-98411573	AluSz6_SINE_Alu	BIN_5341	0.413932	chr3:98411200-98411600
chr3:99380940-99381241	AluSz_SINE_Alu	BIN_5343	0.411676	chr3:99380800-99381200
chr3:99541292-99541578	AluSq_SINE_Alu	BIN_5345	0.568485	chr3:99541200-99541600
chr3:100011442-100011732	AluJb_SINE_Alu	BIN_4884	0.562687	chr3:100011600-100012000
chr3:100054566-100054792	AluJr_SINE_Alu	BIN_4885	0.411895	chr3:100054400-100054800
chr3:100147100-100147401	AluSg_SINE_Alu	BIN_4886	0.453984	chr3:100147200-100147600
chr3:100556315-100556628	AluSx1_SINE_Alu	BIN_4887	0.459279	chr3:100556400-100556800
chr3:100803959-100804077	AluJr_SINE_Alu	BIN_4889	0.478306	chr3:100804000-100804400
chr3:101215106-101215721	AluJo_SINE_Alu,AluSz_SINE_Alu	BIN_4890	0.467123	chr3:101215200-101215600
chr3:101583434-101583984	AluSx_SINE_Alu,AluSz_SINE_Alu	BIN_4893	0.501215	chr3:101583600-101584000
chr3:101608518-101608813	AluSx_SINE_Alu	BIN_4894	0.459279	chr3:101608800-101609200
chr3:102792216-102792546	AluSx_SINE_Alu	BIN_4897	0.425492	chr3:102792000-102792400
chr3:104372525-104372808	AluSx_SINE_Alu	BIN_4901	0.416567	chr3:104372400-104372800
chr3:104389946-104390253	AluSg7_SINE_Alu	BIN_4902	0.416567	chr3:104390000-104390400
chr3:104867340-104867633	AluY_SINE_Alu	BIN_4903	0.429886	chr3:104867200-104867600
chr3:105738289-105738603	AluJb_SINE_Alu	BIN_4904	0.428265	chr3:105738000-105738400
chr3:106571725-106572036	AluSq2_SINE_Alu	BIN_4905	0.425492	chr3:106571600-106572000
chr3:106884923-106885225	AluSz_SINE_Alu	BIN_4906	0.710687	chr3:106884800-106885200
chr3:107510572-107510830	AluSg_SINE_Alu	BIN_4909	0.448236	chr3:107510800-107511200
chr3:108581081-108581393	AluSx1_SINE_Alu	BIN_4912	0.413056	chr3:108581200-108581600
chr3:108884366-108884651	AluSz_SINE_Alu	BIN_4914	0.489632	chr3:108884400-108884800
chr3:111717001-111717286	AluSx_SINE_Alu	BIN_4919	0.454089	chr3:111717200-111717600
chr3:112459270-112459577	AluSx1_SINE_Alu	BIN_4920	0.473114	chr3:112459200-112459600
chr3:113030921-113031229	AluY_SINE_Alu	BIN_4922	0.500763	chr3:113031200-113031600
chr3:113407605-113407908	AluY_SINE_Alu	BIN_4924	0.431304	chr3:113407600-113408000
chr3:113448380-113448703	AluSz_SINE_Alu	BIN_4925	0.431304	chr3:113448400-113448800
chr3:113556451-113556773	AluJb_SINE_Alu,AluJb_SINE_Alu	BIN_4926	0.43658	chr3:113556400-113556800
chr3:113660467-113661059	AluSx_SINE_Alu,AluJb_SINE_Alu	BIN_4927	0.499913	chr3:113660800-113661200
chr3:114638272-114638566	AluSg4_SINE_Alu	BIN_4929	0.473114	chr3:114638000-114638400
chr3:118932789-118933080	AluJo_SINE_Alu	BIN_4932	0.418849	chr3:118932400-118932800
chr3:119199578-119199886	AluSz6_SINE_Alu	BIN_4933	0.411676	chr3:119199600-119200000
chr3:119539585-119539892	AluY_SINE_Alu	BIN_4934	0.421227	chr3:119539600-119540000
chr3:121262548-121262846	AluSx1_SINE_Alu	BIN_4936	0.563753	chr3:121262400-121262800
chr3:121782439-121782697	AluSz_SINE_Alu	BIN_4938	0.414665	chr3:121782400-121782800
chr3:122333598-122333932	AluJb_SINE_Alu	BIN_4940	0.541548	chr3:122333600-122334000
chr3:122345043-122345344	AluY_SINE_Alu	BIN_4941	0.428265	chr3:122345200-122345600
chr3:122516546-122516848	AluJb_SINE_Alu	BIN_4942	0.453893	chr3:122516400-122516800
chr3:122623116-122623389	AluSx_SINE_Alu	BIN_4943	0.494699	chr3:122623200-122623600
chr3:124245139-124245425	AluSz6_SINE_Alu	BIN_4946	0.526419	chr3:124245200-124245600
chr3:124433580-124433880	AluSx1_SINE_Alu	BIN_4947	0.449518	chr3:124433600-124434000
chr3:124627718-124628030	AluSz_SINE_Alu	BIN_4948	0.421398	chr3:124628000-124628400
chr3:125087506-125088130	AluSz_SINE_Alu,AluSz6_SINE_Alu	BIN_4949	0.425667	chr3:125087600-125088000
chr3:125143726-125144307	AluSz_SINE_Alu,AluSx_SINE_Alu	BIN_4950	0.50404	chr3:125143600-125144000
chr3:125395355-125395662	AluSz_SINE_Alu	BIN_4951	0.410405	chr3:125395200-125395600
chr3:125469067-125469370	AluSp_SINE_Alu	BIN_4952	0.419211	chr3:125469200-125469600
chr3:127275106-127275424	AluSx_SINE_Alu	BIN_4954	0.499913	chr3:127275200-127275600
chr3:127369483-127370124	AluY_SINE_Alu,AluSx1_SINE_Alu	BIN_4955	0.434412	chr3:127370000-127370400
chr3:128352055-128352356	AluJb_SINE_Alu	BIN_4956	0.438081	chr3:128352000-128352400
chr3:128617251-128617541	AluJb_SINE_Alu	BIN_4958	0.43367	chr3:128617200-128617600
chr3:128693381-128693990	AluSx1_SINE_Alu,AluY_SINE_Alu	BIN_4960	0.421098	chr3:128693600-128694000
chr3:128859766-128860026	AluSz_SINE_Alu	BIN_4961	0.547448	chr3:128860000-128860400
chr3:129189116-129189714	AluY_SINE_Alu,AluSx_SINE_Alu	BIN_4962	0.441391	chr3:129189200-129189600
chr3:129469413-129469717	AluY_SINE_Alu	BIN_4964	0.445402	chr3:129469600-129470000
chr3:129558328-129558754	FLAM_A_SINE_Alu,AluJr_SINE_Alu	BIN_4965	0.467123	chr3:129558400-129558800
chr3:130519909-130520212	AluSz_SINE_Alu	BIN_4967	0.433093	chr3:130520000-130520400
chr3:130555515-130555819	AluY_SINE_Alu	BIN_4968	0.413678	chr3:130555200-130555600
chr3:130659749-130660056	AluY_SINE_Alu	BIN_4969	0.411895	chr3:130660000-130660400
chr3:131244546-131244856	AluSx_SINE_Alu	BIN_4970	0.428265	chr3:131244800-131245200
chr3:134022647-134022941	AluSp_SINE_Alu	BIN_4972	0.517933	chr3:134022800-134023200
chr3:134520996-134521208	AluY_SINE_Alu,AluY_SINE_Alu	BIN_4973	0.453813	chr3:134520800-134521200
chr3:135902855-135903471	AluSc8_SINE_Alu,AluSx1_SINE_Alu	BIN_4975	0.419328	chr3:135903200-135903600
chr3:135984664-135985426	AluY_SINE_Alu,AluSz_SINE_Alu,AluJb_SINE_Alu	BIN_4976	0.481204	chr3:135985200-135985600
chr3:136063464-136063753	AluSx1_SINE_Alu	BIN_4978	0.458431	chr3:136063600-136064000
chr3:136640627-136640924	AluSc_SINE_Alu	BIN_4979	0.5149	chr3:136640400-136640800
chr3:137722731-137723011	AluSz_SINE_Alu	BIN_4983	0.423589	chr3:137722800-137723200
chr3:137999173-137999769	AluSx_SINE_Alu,AluSg_SINE_Alu,AluSx_SINE_Alu	BIN_4984	0.417083	chr3:137999600-138000000
chr3:138130717-138130844	FLAM_A_SINE_Alu	BIN_4985	0.418849	chr3:138130800-138131200
chr3:138272039-138272342	AluY_SINE_Alu	BIN_4986	0.437482	chr3:138272000-138272400
chr3:138498802-138499410	AluSz6_SINE_Alu,AluSc_SINE_Alu	BIN_4987	0.464257	chr3:138498800-138499200
chr3:138593233-138593791	AluSx_SINE_Alu,AluJr4_SINE_Alu	BIN_4988	0.410405	chr3:138593200-138593600
chr3:139013423-139013720	AluY_SINE_Alu	BIN_4989	0.443892	chr3:139013600-139014000
chr3:141467791-141468077	AluJb_SINE_Alu	BIN_4993	0.48366	chr3:141467600-141468000
chr3:141628813-141629116	AluJr4_SINE_Alu	BIN_4994	0.466282	chr3:141628800-141629200
chr3:141667102-141667397	AluSx_SINE_Alu	BIN_4995	0.482325	chr3:141666800-141667200
chr3:141672730-141673031	AluSp_SINE_Alu	BIN_4996	0.481665	chr3:141672800-141673200
chr3:141706140-141706423	AluSx_SINE_Alu	BIN_4997	0.446148	chr3:141706400-141706800
chr3:141787409-141787700	AluJb_SINE_Alu	BIN_4998	0.410481	chr3:141787600-141788000
chr3:141809391-141809702	AluSx1_SINE_Alu	BIN_4999	0.421227	chr3:141809200-141809600
chr3:141918990-141919305	AluSx_SINE_Alu	BIN_5000	0.468075	chr3:141919200-141919600
chr3:141959381-141959676	AluSc_SINE_Alu	BIN_5001	0.467123	chr3:141959200-141959600
chr3:143507252-143507550	AluSx_SINE_Alu	BIN_5004	0.536198	chr3:143507200-143507600
chr3:143723269-143723569	AluSx1_SINE_Alu	BIN_5005	0.431304	chr3:143723200-143723600
chr3:146180971-146181241	AluY_SINE_Alu	BIN_5006	0.559346	chr3:146180800-146181200
chr3:147021400-147021711	AluY_SINE_Alu	BIN_5008	0.413678	chr3:147021600-147022000
chr3:147037307-147037935	AluJo_SINE_Alu,AluSq2_SINE_Alu	BIN_5009	0.411676	chr3:147037600-147038000
chr3:148810213-148810514	AluJo_SINE_Alu	BIN_5011	0.479726	chr3:148810400-148810800
chr3:149063370-149063669	AluSz_SINE_Alu	BIN_5012	0.494556	chr3:149063200-149063600
chr3:149164751-149164984	AluSz_SINE_Alu	BIN_5013	0.574144	chr3:149164800-149165200
chr3:150247131-150247441	AluSz6_SINE_Alu	BIN_5015	0.44496	chr3:150247200-150247600
chr3:150450699-150450995	AluSx1_SINE_Alu	BIN_5016	0.425492	chr3:150450800-150451200
chr3:151702231-151702535	AluY_SINE_Alu	BIN_5023	0.421398	chr3:151702400-151702800
chr3:152823072-152823363	AluSx1_SINE_Alu	BIN_5026	0.459279	chr3:152822800-152823200
chr3:154684405-154684711	AluSx_SINE_Alu	BIN_5029	0.414665	chr3:154684400-154684800
chr3:155592685-155593318	AluSz_SINE_Alu,AluSx_SINE_Alu	BIN_5030	0.422784	chr3:155592800-155593200
chr3:155631312-155631608	AluSz6_SINE_Alu	BIN_5031	0.62205	chr3:155631200-155631600
chr3:155824384-155824689	AluSz_SINE_Alu	BIN_5032	0.473974	chr3:155824400-155824800
chr3:156470155-156470446	AluSx1_SINE_Alu	BIN_5036	0.421227	chr3:156470400-156470800
chr3:156504508-156504782	AluSx1_SINE_Alu	BIN_5037	0.554128	chr3:156504400-156504800
chr3:157766607-157766965	AluSx_SINE_Alu	BIN_5041	0.419058	chr3:157766400-157766800
chr3:157987307-157987580	AluSc_SINE_Alu	BIN_5043	0.508971	chr3:157987200-157987600
chr3:158460130-158460428	AluSx1_SINE_Alu	BIN_5044	0.454089	chr3:158460400-158460800
chr3:159423489-159423793	AluSg_SINE_Alu	BIN_5046	0.535731	chr3:159423600-159424000
chr3:159595984-159596594	AluSx1_SINE_Alu,AluYa5_SINE_Alu	BIN_5047	0.551603	chr3:159596000-159596400
chr3:159734252-159734542	AluSg_SINE_Alu	BIN_5048	0.431304	chr3:159734400-159734800
chr3:159873136-159873448	AluSz6_SINE_Alu	BIN_5049	0.421098	chr3:159873200-159873600
chr3:160031396-160031695	AluSx3_SINE_Alu	BIN_5050	0.419058	chr3:160031600-160032000
chr3:160847139-160847955	AluJr_SINE_Alu,AluJr_SINE_Alu,AluSx1_SINE_Alu	BIN_5052	0.471834	chr3:160847600-160848000
chr3:163285072-163285367	AluSp_SINE_Alu	BIN_5054	0.421398	chr3:163285200-163285600
chr3:169150974-169151250	AluSq2_SINE_Alu	BIN_5059	0.515436	chr3:169150800-169151200
chr3:169467238-169467825	AluJr_SINE_Alu,AluSx3_SINE_Alu	BIN_5060	0.463913	chr3:169467200-169467600
chr3:169468167-169468442	AluSx_SINE_Alu	BIN_5061	0.463182	chr3:169468000-169468400
chr3:169520478-169520779	AluSq2_SINE_Alu	BIN_5062	0.419211	chr3:169520400-169520800
chr3:169717712-169718007	AluSx_SINE_Alu	BIN_5063	0.441391	chr3:169717600-169718000
chr3:169823718-169823993	AluSx1_SINE_Alu	BIN_5064	0.428638	chr3:169823600-169824000
chr3:169901079-169901371	AluSx_SINE_Alu	BIN_5065	0.416567	chr3:169900800-169901200
chr3:170012717-170013646	AluSx1_SINE_Alu,AluJb_SINE_Alu,AluSz_SINE_Alu,AluJb_SINE_Alu	BIN_5066	0.589988	chr3:170012800-170013200
chr3:170030148-170030736	AluSx_SINE_Alu,AluSx_SINE_Alu	BIN_5067	0.419211	chr3:170030400-170030800
chr3:170047756-170048058	AluSc5_SINE_Alu	BIN_5068	0.453984	chr3:170047600-170048000
chr3:170266997-170267302	AluSc_SINE_Alu	BIN_5069	0.475246	chr3:170267200-170267600
chr3:170268301-170268610	AluSq2_SINE_Alu	BIN_5070	0.411676	chr3:170268400-170268800
chr3:170461282-170461732	AluJo_SINE_Alu,AluSz_SINE_Alu	BIN_5071	0.487468	chr3:170461200-170461600
chr3:171621048-171621342	AluSq_SINE_Alu	BIN_5075	0.410405	chr3:171621200-171621600
chr3:171722752-171723053	AluSx1_SINE_Alu	BIN_5076	0.413678	chr3:171722400-171722800
chr3:172443649-172443948	AluSx_SINE_Alu	BIN_5077	0.481204	chr3:172443600-172444000
chr3:174567246-174567549	AluSg_SINE_Alu	BIN_5080	0.43658	chr3:174567200-174567600
chr3:174603691-174604002	AluY_SINE_Alu	BIN_5081	0.540816	chr3:174604000-174604400
chr3:174686302-174686566	AluSg_SINE_Alu	BIN_5082	0.474577	chr3:174686400-174686800
chr3:175285491-175285803	AluSz6_SINE_Alu	BIN_5083	0.541086	chr3:175285600-175286000
chr3:176145412-176145713	AluSp_SINE_Alu	BIN_5084	0.443892	chr3:176145200-176145600
chr3:176813283-176813570	AluSz_SINE_Alu	BIN_5087	0.419211	chr3:176813200-176813600
chr3:176933658-176934578	AluSq_SINE_Alu,AluJb_SINE_Alu,AluSg_SINE_Alu,AluJb_SINE_Alu	BIN_5089	0.461973	chr3:176933600-176934000
chr3:177048042-177048346	AluSx1_SINE_Alu	BIN_5090	0.415394	chr3:177048000-177048400
chr3:177644299-177644613	AluSq_SINE_Alu	BIN_5091	0.429952	chr3:177644400-177644800
chr3:179061247-179061550	AluSx1_SINE_Alu	BIN_5094	0.424819	chr3:179061200-179061600
chr3:179309978-179310281	AluY_SINE_Alu	BIN_5095	0.439949	chr3:179310000-179310400
chr3:179483765-179484065	AluSc5_SINE_Alu	BIN_5096	0.44857	chr3:179484000-179484400
chr3:179542211-179542517	AluSp_SINE_Alu	BIN_5097	0.481665	chr3:179542000-179542400
chr3:180713745-180714052	AluJr_SINE_Alu	BIN_5098	0.497527	chr3:180714000-180714400
chr3:180717882-180718192	AluY_SINE_Alu	BIN_5099	0.476264	chr3:180718000-180718400
chr3:181521391-181521700	AluSp_SINE_Alu	BIN_5100	0.438081	chr3:181521200-181521600
chr3:182363219-182363543	AluY_SINE_Alu	BIN_5101	0.486797	chr3:182363200-182363600
chr3:182772909-182773215	AluSg7_SINE_Alu	BIN_5102	0.423589	chr3:182772800-182773200
chr3:183340008-183340310	AluSz_SINE_Alu	BIN_5104	0.410481	chr3:183340000-183340400
chr3:183475863-183476156	AluSx_SINE_Alu	BIN_5105	0.516495	chr3:183476000-183476400
chr3:183610114-183610391	AluSx_SINE_Alu	BIN_5106	0.481665	chr3:183610000-183610400
chr3:183658007-183658276	AluSz6_SINE_Alu	BIN_5107	0.558125	chr3:183658000-183658400
chr3:183783302-183783605	AluSq_SINE_Alu	BIN_5108	0.492082	chr3:183783600-183784000
chr3:183813529-183813825	AluSx_SINE_Alu	BIN_5109	0.419058	chr3:183813600-183814000
chr3:183921763-183922056	AluJb_SINE_Alu	BIN_5110	0.410405	chr3:183921600-183922000
chr3:183970448-183970759	AluSx1_SINE_Alu	BIN_5111	0.41747	chr3:183970400-183970800
chr3:184892357-184892665	AluSc_SINE_Alu	BIN_5113	0.419211	chr3:184892400-184892800
chr3:184966924-184967215	AluY_SINE_Alu	BIN_5114	0.44857	chr3:184967200-184967600
chr3:185506498-185506927	AluSx_SINE_Alu,FAM_SINE_Alu	BIN_5115	0.570509	chr3:185506800-185507200
chr3:185556557-185556862	AluSz6_SINE_Alu	BIN_5116	0.64965	chr3:185556400-185556800
chr3:185836060-185836351	AluJb_SINE_Alu	BIN_5117	0.547233	chr3:185836000-185836400
chr3:186144968-186145270	AluSx1_SINE_Alu	BIN_5118	0.428265	chr3:186145200-186145600
chr3:186283823-186284129	AluSx1_SINE_Alu	BIN_5119	0.431567	chr3:186283600-186284000
chr3:186958419-186958723	AluSx_SINE_Alu	BIN_5121	0.43367	chr3:186958400-186958800
chr3:187200862-187201165	AluSx1_SINE_Alu	BIN_5122	0.419211	chr3:187200800-187201200
chr3:187812248-187812546	AluSx_SINE_Alu	BIN_5123	0.439079	chr3:187812400-187812800
chr3:187877685-187878281	AluSg_SINE_Alu,AluSq2_SINE_Alu	BIN_5124	0.498685	chr3:187878000-187878400
chr3:188137403-188137692	AluSx_SINE_Alu	BIN_5125	0.429886	chr3:188137200-188137600
chr3:189881732-189882036	AluSz_SINE_Alu	BIN_5127	0.554128	chr3:189882000-189882400
chr3:192279153-192279448	AluSc8_SINE_Alu	BIN_5128	0.425492	chr3:192279200-192279600
chr3:192626180-192626506	AluY_SINE_Alu	BIN_5129	0.421227	chr3:192626000-192626400
chr3:194106067-194106384	AluSx_SINE_Alu	BIN_5132	0.484704	chr3:194106000-194106400
chr3:194295178-194295479	AluSx1_SINE_Alu	BIN_5133	0.464862	chr3:194295200-194295600
chr3:194314550-194314840	AluJo_SINE_Alu	BIN_5134	0.421227	chr3:194314800-194315200
chr3:194431474-194431750	AluSx_SINE_Alu	BIN_5135	0.453984	chr3:194431200-194431600
chr3:194663456-194663747	AluSx_SINE_Alu	BIN_5136	0.437482	chr3:194663600-194664000
chr3:195565298-195565606	AluSx_SINE_Alu	BIN_5137	0.417083	chr3:195565200-195565600
chr3:195836852-195837141	AluY_SINE_Alu	BIN_5138	0.417083	chr3:195836800-195837200
chr3:195852195-195852556	AluSx3_SINE_Alu,AluSq2_SINE_Alu	BIN_5139	0.429886	chr3:195852000-195852400
chr3:195979029-195979411	AluJb_SINE_Alu,AluSz_SINE_Alu	BIN_5140	0.410405	chr3:195979200-195979600
chr3:196049397-196049861	FLAM_C_SINE_Alu,AluSz_SINE_Alu	BIN_5141	0.557105	chr3:196049600-196050000
chr3:196093482-196094074	AluJr_SINE_Alu,AluSz_SINE_Alu	BIN_5142	0.512909	chr3:196093600-196094000
chr3:196635412-196635712	AluSp_SINE_Alu	BIN_5143	0.507485	chr3:196635200-196635600
chr3:196933173-196933458	AluJb_SINE_Alu	BIN_5144	0.428638	chr3:196933200-196933600
chr3:196977598-196977876	AluSx1_SINE_Alu	BIN_5145	0.438287	chr3:196977600-196978000
chr3:197050643-197050916	AluSc_SINE_Alu	BIN_5146	0.583353	chr3:197050400-197050800
chr3:197069458-197069767	AluSx_SINE_Alu	BIN_5147	0.431304	chr3:197069600-197070000
chr3:197167441-197167739	AluSx_SINE_Alu	BIN_5148	0.494879	chr3:197167600-197168000
chr3:197233505-197233810	AluSx_SINE_Alu	BIN_5150	0.417083	chr3:197233600-197234000
chr3:197752024-197752156	FLAM_C_SINE_Alu	BIN_5152	0.46916	chr3:197752000-197752400
chr4:1661741-1662626	AluSq_SINE_Alu,AluJb_SINE_Alu,AluY_SINE_Alu	BIN_5472	0.515436	chr4:1661600-1662000
chr4:1896142-1896427	AluJb_SINE_Alu	BIN_5524	0.484704	chr4:1896000-1896400
chr4:2020221-2020483	AluJo_SINE_Alu	BIN_5527	0.481665	chr4:2020000-2020400
chr4:2223306-2223601	AluSx1_SINE_Alu	BIN_5532	0.585916	chr4:2223200-2223600
chr4:2340541-2340835	AluSc8_SINE_Alu	BIN_5535	0.423589	chr4:2340800-2341200
chr4:2475257-2476127	AluSg7_SINE_Alu,AluSx1_SINE_Alu,AluSc8_SINE_Alu	BIN_5537	0.458431	chr4:2475600-2476000
chr4:2724572-2725313	AluJb_SINE_Alu,AluY_SINE_Alu,AluSg7_SINE_Alu	BIN_5550	0.463913	chr4:2724400-2724800
chr4:2749906-2750817	AluSx_SINE_Alu,AluY_SINE_Alu,AluSx_SINE_Alu,AluJb_SINE_Alu	BIN_5551	0.445795	chr4:2750000-2750400
chr4:2753550-2753860	AluSx3_SINE_Alu	BIN_5552	0.441391	chr4:2753600-2754000
chr4:2843118-2843422	AluSz6_SINE_Alu	BIN_5554	0.410405	chr4:2843200-2843600
chr4:3070380-3070681	AluSx1_SINE_Alu	BIN_5555	0.497073	chr4:3070400-3070800
chr4:4348053-4348495	AluSz6_SINE_Alu,AluSx_SINE_Alu	BIN_5598	0.471834	chr4:4348400-4348800
chr4:4502480-4502790	AluSq2_SINE_Alu	BIN_5599	0.516495	chr4:4502400-4502800
chr4:4550049-4550347	AluSx_SINE_Alu	BIN_5600	0.630175	chr4:4550000-4550400
chr4:5178165-5178470	AluSq2_SINE_Alu	BIN_5614	0.478306	chr4:5178400-5178800
chr4:6649933-6650534	AluY_SINE_Alu,AluJb_SINE_Alu	BIN_5643	0.413678	chr4:6649600-6650000
chr4:7895025-7895326	AluY_SINE_Alu	BIN_5666	0.416567	chr4:7894800-7895200
chr4:8067368-8067670	AluSx1_SINE_Alu	BIN_5670	0.467123	chr4:8067200-8067600
chr4:8301568-8301865	AluSx1_SINE_Alu	BIN_5673	0.466282	chr4:8301600-8302000
chr4:8858532-8858815	AluJo_SINE_Alu	BIN_5691	0.44496	chr4:8858400-8858800
chr4:9530489-9530792	AluY_SINE_Alu	BIN_5705	0.419058	chr4:9530400-9530800
chr4:9707936-9708319	AluSz6_SINE_Alu,AluSq2_SINE_Alu	BIN_5710	0.476679	chr4:9708000-9708400
chr4:10660579-10660838	AluSq_SINE_Alu	BIN_5365	0.467123	chr4:10660400-10660800
chr4:13129634-13129940	AluSc_SINE_Alu	BIN_5418	0.419211	chr4:13129600-13130000
chr4:15718433-15718702	AluSq_SINE_Alu	BIN_5458	0.415394	chr4:15718400-15718800
chr4:15733946-15734240	AluSq_SINE_Alu	BIN_5459	0.494699	chr4:15734000-15734400
chr4:15969011-15969306	AluSc_SINE_Alu	BIN_5463	0.44446	chr4:15968800-15969200
chr4:15979223-15979520	AluSc8_SINE_Alu	BIN_5464	0.41747	chr4:15979200-15979600
chr4:16096887-16097100	AluSx_SINE_Alu	BIN_5467	0.410405	chr4:16096800-16097200
chr4:16745769-16746398	AluSx1_SINE_Alu,AluY_SINE_Alu	BIN_5475	0.505836	chr4:16746000-16746400
chr4:16938249-16938694	FLAM_A_SINE_Alu,AluSz6_SINE_Alu	BIN_5478	0.425492	chr4:16938400-16938800
chr4:17475956-17476253	AluSx3_SINE_Alu	BIN_5487	0.473114	chr4:17476000-17476400
chr4:17775717-17776023	AluJb_SINE_Alu	BIN_5493	0.497073	chr4:17775600-17776000
chr4:17991719-17992021	AluY_SINE_Alu	BIN_5495	0.476679	chr4:17991600-17992000
chr4:18624036-18624329	AluSx_SINE_Alu	BIN_5510	0.443892	chr4:18624000-18624400
chr4:20307213-20307495	AluSz_SINE_Alu	BIN_5528	0.44496	chr4:20307200-20307600
chr4:20382594-20382899	AluSx_SINE_Alu	BIN_5529	0.414665	chr4:20382400-20382800
chr4:20435828-20436134	AluSp_SINE_Alu	BIN_5530	0.423132	chr4:20436000-20436400
chr4:22594321-22594633	AluSx_SINE_Alu	BIN_5533	0.43658	chr4:22594400-22594800
chr4:23379743-23380027	AluSx1_SINE_Alu	BIN_5534	0.410405	chr4:23379600-23380000
chr4:23566099-23566273	AluY_SINE_Alu	BIN_5536	0.433093	chr4:23566000-23566400
chr4:25377688-25378036	AluY_SINE_Alu	BIN_5538	0.459804	chr4:25378000-25378400
chr4:25444052-25444342	AluJr_SINE_Alu	BIN_5539	0.453743	chr4:25444000-25444400
chr4:25632022-25632747	AluJb_SINE_Alu,AluJr_SINE_Alu,AluJb_SINE_Alu	BIN_5540	0.411676	chr4:25632400-25632800
chr4:25701246-25701673	AluSg_SINE_Alu,AluSc_SINE_Alu	BIN_5541	0.528644	chr4:25701200-25701600
chr4:25726940-25727235	AluSz_SINE_Alu	BIN_5542	0.418849	chr4:25727200-25727600
chr4:25970473-25970719	AluSx_SINE_Alu	BIN_5543	0.428638	chr4:25970400-25970800
chr4:26192485-26192802	AluJr_SINE_Alu	BIN_5544	0.462541	chr4:26192400-26192800
chr4:26296219-26296512	AluSz_SINE_Alu	BIN_5545	0.416567	chr4:26296400-26296800
chr4:26467098-26467283	AluSx_SINE_Alu	BIN_5546	0.541926	chr4:26467200-26467600
chr4:26795064-26795367	AluSz_SINE_Alu	BIN_5547	0.516495	chr4:26795200-26795600
chr4:26827541-26827846	AluSz_SINE_Alu	BIN_5548	0.440713	chr4:26827600-26828000
chr4:27170913-27171234	AluSz6_SINE_Alu	BIN_5549	0.413932	chr4:27170800-27171200
chr4:27739256-27739552	AluJr4_SINE_Alu	BIN_5553	0.47041	chr4:27739200-27739600
chr4:32620198-32620496	AluSq2_SINE_Alu	BIN_5556	0.433093	chr4:32620400-32620800
chr4:32915881-32916191	AluSc_SINE_Alu	BIN_5557	0.427162	chr4:32916000-32916400
chr4:33049286-33049542	AluSc_SINE_Alu	BIN_5558	0.453743	chr4:33049200-33049600
chr4:33107388-33107689	AluSg4_SINE_Alu	BIN_5559	0.423589	chr4:33107200-33107600
chr4:34063899-34064183	AluSx1_SINE_Alu	BIN_5560	0.414665	chr4:34064000-34064400
chr4:34795155-34795464	AluSz_SINE_Alu	BIN_5563	0.410405	chr4:34795200-34795600
chr4:36289720-36290019	AluSx1_SINE_Alu	BIN_5564	0.435569	chr4:36290000-36290400
chr4:36997471-36997764	AluSz_SINE_Alu	BIN_5567	0.439079	chr4:36997600-36998000
chr4:37772435-37772720	AluJb_SINE_Alu	BIN_5568	0.453743	chr4:37772400-37772800
chr4:37812641-37812950	AluSc_SINE_Alu	BIN_5569	0.439949	chr4:37812800-37813200
chr4:37839509-37839802	AluSx1_SINE_Alu	BIN_5570	0.413678	chr4:37839200-37839600
chr4:37901459-37901766	AluY_SINE_Alu	BIN_5571	0.443892	chr4:37901200-37901600
chr4:37927056-37927330	AluSc_SINE_Alu	BIN_5572	0.554128	chr4:37927200-37927600
chr4:37994114-37994724	AluY_SINE_Alu,AluSx_SINE_Alu	BIN_5573	0.421098	chr4:37994400-37994800
chr4:38081063-38081360	AluSq2_SINE_Alu	BIN_5574	0.429886	chr4:38081200-38081600
chr4:39244159-39244587	AluJr_SINE_Alu,AluSz6_SINE_Alu	BIN_5575	0.427162	chr4:39244400-39244800
chr4:39346642-39346936	AluSz_SINE_Alu	BIN_5576	0.423589	chr4:39346800-39347200
chr4:39436432-39437345	AluSx1_SINE_Alu,AluSz_SINE_Alu,AluSq_SINE_Alu	BIN_5577	0.416395	chr4:39436800-39437200
chr4:39550532-39550833	AluSx1_SINE_Alu	BIN_5578	0.427675	chr4:39550800-39551200
chr4:39633829-39634395	AluSc_SINE_Alu,AluJb_SINE_Alu	BIN_5579	0.470892	chr4:39634000-39634400
chr4:39860247-39860489	AluSq2_SINE_Alu	BIN_5580	0.421398	chr4:39860000-39860400
chr4:39964143-39964604	AluSc_SINE_Alu,AluSc8_SINE_Alu	BIN_5581	0.440713	chr4:39964000-39964400
chr4:39983825-39984374	AluSx_SINE_Alu,AluSx_SINE_Alu,AluSx1_SINE_Alu	BIN_5582	0.413932	chr4:39984000-39984400
chr4:40150272-40150409	FLAM_C_SINE_Alu	BIN_5583	0.454089	chr4:40150000-40150400
chr4:40152899-40153191	AluSz_SINE_Alu	BIN_5584	0.467123	chr4:40152800-40153200
chr4:40290782-40291093	AluSq_SINE_Alu	BIN_5585	0.449518	chr4:40290800-40291200
chr4:40600989-40601298	AluSz_SINE_Alu	BIN_5586	0.458826	chr4:40600800-40601200
chr4:40803632-40803946	AluJb_SINE_Alu	BIN_5587	0.427162	chr4:40803600-40804000
chr4:40865627-40865933	AluSz_SINE_Alu	BIN_5588	0.515436	chr4:40865600-40866000
chr4:40915970-40916579	AluSx_SINE_Alu,AluY_SINE_Alu,AluSx_SINE_Alu	BIN_5589	0.62157	chr4:40916400-40916800
chr4:41345480-41345789	AluJr4_SINE_Alu	BIN_5590	0.410405	chr4:41345600-41346000
chr4:41928521-41928823	AluSx_SINE_Alu	BIN_5591	0.41747	chr4:41928400-41928800
chr4:42000476-42000778	AluSx3_SINE_Alu	BIN_5592	0.431304	chr4:42000400-42000800
chr4:42070262-42070561	AluSp_SINE_Alu	BIN_5594	0.532609	chr4:42070400-42070800
chr4:42374545-42374846	AluSc8_SINE_Alu	BIN_5596	0.426395	chr4:42374800-42375200
chr4:42477772-42478065	AluSx1_SINE_Alu	BIN_5597	0.433093	chr4:42478000-42478400
chr4:47303371-47303663	AluJo_SINE_Alu	BIN_5603	0.460418	chr4:47303600-47304000
chr4:54022268-54022876	AluSg4_SINE_Alu,AluY_SINE_Alu	BIN_5618	0.464751	chr4:54022800-54023200
chr4:54769218-54769503	AluJb_SINE_Alu	BIN_5621	0.426395	chr4:54769200-54769600
chr4:55152486-55152822	AluSz_SINE_Alu	BIN_5623	0.424214	chr4:55152800-55153200
chr4:55985093-55985390	AluSz6_SINE_Alu	BIN_5624	0.426395	chr4:55984800-55985200
chr4:56181856-56182140	AluSz_SINE_Alu	BIN_5626	0.416567	chr4:56181600-56182000
chr4:56477246-56477542	AluJo_SINE_Alu	BIN_5627	0.423132	chr4:56477200-56477600
chr4:56887908-56888218	AluJb_SINE_Alu	BIN_5628	0.449107	chr4:56888000-56888400
chr4:56947859-56948150	AluSz_SINE_Alu	BIN_5629	0.489181	chr4:56948000-56948400
chr4:57574642-57574957	AluSx_SINE_Alu	BIN_5630	0.434412	chr4:57574400-57574800
chr4:57682435-57682833	AluSx_SINE_Alu,AluSx_SINE_Alu	BIN_5631	0.435565	chr4:57682400-57682800
chr4:57714488-57715401	AluSz_SINE_Alu,AluSc_SINE_Alu,AluY_SINE_Alu	BIN_5632	0.494556	chr4:57715200-57715600
chr4:57760372-57761440	AluSz_SINE_Alu,FLAM_C_SINE_Alu,AluJb_SINE_Alu,AluSx_SINE_Alu,AluJb_SINE_Alu	BIN_5633	0.423132	chr4:57760400-57760800
chr4:57816819-57817127	AluSz_SINE_Alu	BIN_5634	0.567526	chr4:57816800-57817200
chr4:59064536-59064818	AluY_SINE_Alu	BIN_5635	0.421398	chr4:59064800-59065200
chr4:63036666-63036966	AluSg_SINE_Alu	BIN_5638	0.434412	chr4:63036800-63037200
chr4:63082614-63082919	AluSz_SINE_Alu	BIN_5639	0.453984	chr4:63082400-63082800
chr4:64970994-64971273	AluSx4_SINE_Alu	BIN_5640	0.464751	chr4:64971200-64971600
chr4:66484590-66484884	AluSx1_SINE_Alu	BIN_5642	0.425492	chr4:66484400-66484800
chr4:67576849-67576938	AluJr_SINE_Alu	BIN_5644	0.439079	chr4:67576800-67577200
chr4:67792012-67792307	AluSc_SINE_Alu	BIN_5645	0.474577	chr4:67792000-67792400
chr4:71686861-71687692	AluSp_SINE_Alu,AluSc8_SINE_Alu,AluSx_SINE_Alu	BIN_5648	0.445402	chr4:71687200-71687600
chr4:71785211-71785514	AluSx_SINE_Alu	BIN_5649	0.492308	chr4:71785200-71785600
chr4:74444373-74444627	AluSz_SINE_Alu	BIN_5654	0.421098	chr4:74444400-74444800
chr4:76258649-76258945	AluY_SINE_Alu	BIN_5656	0.433093	chr4:76258800-76259200
chr4:76599903-76600206	AluSg_SINE_Alu	BIN_5657	0.510575	chr4:76600000-76600400
chr4:76767622-76767924	AluSx1_SINE_Alu	BIN_5658	0.561592	chr4:76767600-76768000
chr4:76818657-76818928	AluSz_SINE_Alu	BIN_5659	0.524583	chr4:76818800-76819200
chr4:76826558-76826809	AluSz6_SINE_Alu	BIN_5660	0.46916	chr4:76826800-76827200
chr4:77018373-77018659	AluJr_SINE_Alu	BIN_5661	0.411676	chr4:77018400-77018800
chr4:77111654-77111969	AluSz_SINE_Alu	BIN_5662	0.426324	chr4:77111600-77112000
chr4:78011606-78012119	AluJr_SINE_Alu,AluSq2_SINE_Alu	BIN_5663	0.410481	chr4:78012000-78012400
chr4:78050134-78050429	AluY_SINE_Alu	BIN_5664	0.465725	chr4:78050400-78050800
chr4:79019425-79019727	AluSz_SINE_Alu	BIN_5667	0.410405	chr4:79019600-79020000
chr4:80110103-80110318	AluY_SINE_Alu	BIN_5669	0.431304	chr4:80110000-80110400
chr4:83298009-83298955	AluJb_SINE_Alu,AluY_SINE_Alu,AluJb_SINE_Alu,AluSz_SINE_Alu,AluJb_SINE_Alu	BIN_5674	0.462541	chr4:83298400-83298800
chr4:83502603-83502913	AluSz_SINE_Alu	BIN_5675	0.421227	chr4:83502800-83503200
chr4:83640656-83641171	AluY_SINE_Alu,AluSx_SINE_Alu	BIN_5676	0.453743	chr4:83640800-83641200
chr4:83683043-83683331	AluJo_SINE_Alu	BIN_5677	0.44446	chr4:83682800-83683200
chr4:83686768-83687066	AluSz6_SINE_Alu	BIN_5678	0.419211	chr4:83686800-83687200
chr4:83866653-83866946	AluSx_SINE_Alu	BIN_5679	0.458431	chr4:83866800-83867200
chr4:84195014-84195331	AluJr_SINE_Alu	BIN_5681	0.535217	chr4:84194800-84195200
chr4:84344781-84345085	AluSq2_SINE_Alu	BIN_5683	0.481204	chr4:84344800-84345200
chr4:87068227-87068505	AluSz6_SINE_Alu	BIN_5686	0.481665	chr4:87068400-87068800
chr4:87879588-87879895	AluSx_SINE_Alu	BIN_5688	0.44496	chr4:87879600-87880000
chr4:87918632-87918926	AluY_SINE_Alu	BIN_5689	0.416567	chr4:87918400-87918800
chr4:88446037-88446328	AluSz6_SINE_Alu	BIN_5690	0.429886	chr4:88446000-88446400
chr4:88601886-88602194	AluSp_SINE_Alu	BIN_5692	0.525542	chr4:88602000-88602400
chr4:88741894-88742176	AluSg_SINE_Alu	BIN_5693	0.479911	chr4:88742000-88742400
chr4:89288503-89288818	AluSz_SINE_Alu	BIN_5694	0.589942	chr4:89288800-89289200
chr4:89448390-89448711	AluJr_SINE_Alu	BIN_5696	0.438081	chr4:89448400-89448800
chr4:89511137-89511739	AluSz_SINE_Alu,AluY_SINE_Alu	BIN_5697	0.537368	chr4:89511200-89511600
chr4:89543799-89544097	AluSg_SINE_Alu	BIN_5698	0.478306	chr4:89544000-89544400
chr4:92528384-92528599	AluJb_SINE_Alu	BIN_5702	0.413678	chr4:92528400-92528800
chr4:94802123-94802420	AluJb_SINE_Alu	BIN_5703	0.497527	chr4:94802000-94802400
chr4:95163772-95164066	AluJo_SINE_Alu	BIN_5704	0.496707	chr4:95164000-95164400
chr4:95447877-95448505	AluSz_SINE_Alu,AluSc_SINE_Alu	BIN_5706	0.48366	chr4:95448400-95448800
chr4:95565680-95565992	AluSc8_SINE_Alu	BIN_5707	0.476679	chr4:95565600-95566000
chr4:95658162-95658442	AluSz_SINE_Alu	BIN_5708	0.414665	chr4:95658400-95658800
chr4:97111527-97111838	AluSx1_SINE_Alu	BIN_5711	0.462541	chr4:97111600-97112000
chr4:97309146-97309438	AluSc8_SINE_Alu	BIN_5712	0.413056	chr4:97309200-97309600
chr4:99177996-99178303	AluY_SINE_Alu	BIN_5714	0.431304	chr4:99178000-99178400
chr4:100248725-100248903	AluJb_SINE_Alu	BIN_5348	0.485949	chr4:100248800-100249200
chr4:100850244-100850549	AluSx1_SINE_Alu	BIN_5350	0.429886	chr4:100850000-100850400
chr4:100878331-100878628	AluSx_SINE_Alu	BIN_5351	0.595972	chr4:100878400-100878800
chr4:102115724-102116023	AluSx1_SINE_Alu	BIN_5353	0.508971	chr4:102116000-102116400
chr4:102232654-102232921	AluSz_SINE_Alu	BIN_5354	0.541086	chr4:102232800-102233200
chr4:102359277-102359589	AluY_SINE_Alu	BIN_5355	0.54737	chr4:102359200-102359600
chr4:102373738-102374067	AluSx3_SINE_Alu	BIN_5356	0.512045	chr4:102374000-102374400
chr4:103145910-103146084	AluY_SINE_Alu	BIN_5358	0.541086	chr4:103146000-103146400
chr4:103633681-103633984	AluJb_SINE_Alu	BIN_5359	0.434412	chr4:103633600-103634000
chr4:104703830-104704132	AluSc8_SINE_Alu	BIN_5362	0.622623	chr4:104704000-104704400
chr4:105271324-105271597	AluJb_SINE_Alu	BIN_5363	0.418849	chr4:105271200-105271600
chr4:108736823-108737124	AluSx1_SINE_Alu	BIN_5367	0.441996	chr4:108736800-108737200
chr4:108917769-108918073	AluSz_SINE_Alu	BIN_5368	0.464751	chr4:108917600-108918000
chr4:109117197-109117495	AluSz_SINE_Alu	BIN_5369	0.43367	chr4:109117200-109117600
chr4:109561185-109561482	AluSc5_SINE_Alu	BIN_5370	0.423132	chr4:109561200-109561600
chr4:109661935-109662243	AluSx_SINE_Alu	BIN_5371	0.439949	chr4:109662000-109662400
chr4:109662588-109662868	AluJb_SINE_Alu	BIN_5372	0.417083	chr4:109662400-109662800
chr4:110430547-110430858	AluY_SINE_Alu	BIN_5373	0.535731	chr4:110430400-110430800
chr4:110548786-110549087	AluSx_SINE_Alu	BIN_5374	0.541926	chr4:110548800-110549200
chr4:111209065-111209462	AluSx1_SINE_Alu,AluSz_SINE_Alu	BIN_5377	0.530799	chr4:111209200-111209600
chr4:111450947-111451254	AluSq2_SINE_Alu	BIN_5378	0.423132	chr4:111450800-111451200
chr4:112235286-112235580	AluSq2_SINE_Alu	BIN_5379	0.427162	chr4:112235200-112235600
chr4:113716662-113717254	AluSg_SINE_Alu,AluJb_SINE_Alu	BIN_5380	0.421398	chr4:113716400-113716800
chr4:113814869-113815173	AluSz6_SINE_Alu	BIN_5381	0.472837	chr4:113814800-113815200
chr4:114866315-114866593	AluJb_SINE_Alu	BIN_5382	0.547735	chr4:114866400-114866800
chr4:115645040-115645338	AluSx1_SINE_Alu	BIN_5385	0.47041	chr4:115645200-115645600
chr4:117636354-117636666	AluY_SINE_Alu	BIN_5386	0.416567	chr4:117636400-117636800
chr4:118395225-118395530	AluSx_SINE_Alu	BIN_5387	0.431304	chr4:118395200-118395600
chr4:119281762-119282068	AluSq2_SINE_Alu	BIN_5388	0.449107	chr4:119281600-119282000
chr4:119628993-119629272	AluSx3_SINE_Alu	BIN_5389	0.562687	chr4:119629200-119629600
chr4:121042531-121042827	AluSp_SINE_Alu	BIN_5391	0.473114	chr4:121042400-121042800
chr4:122624640-122624949	AluSx_SINE_Alu	BIN_5394	0.413056	chr4:122624800-122625200
chr4:122645079-122645387	AluSx1_SINE_Alu	BIN_5395	0.489632	chr4:122645200-122645600
chr4:123638675-123638979	AluJr_SINE_Alu	BIN_5396	0.458431	chr4:123638800-123639200
chr4:123639967-123640273	AluY_SINE_Alu	BIN_5397	0.437482	chr4:123640000-123640400
chr4:123885376-123885673	AluSz_SINE_Alu	BIN_5398	0.527433	chr4:123885200-123885600
chr4:124069924-124070222	AluSx_SINE_Alu	BIN_5399	0.415394	chr4:124070000-124070400
chr4:124113176-124113473	AluSx1_SINE_Alu	BIN_5400	0.417083	chr4:124113200-124113600
chr4:127773757-127774058	AluSx4_SINE_Alu	BIN_5403	0.500763	chr4:127773600-127774000
chr4:128502852-128503018	AluJb_SINE_Alu	BIN_5404	0.535217	chr4:128502800-128503200
chr4:128676906-128677202	AluSx_SINE_Alu	BIN_5407	0.468802	chr4:128676800-128677200
chr4:128772407-128772710	AluSq2_SINE_Alu	BIN_5408	0.445402	chr4:128772400-128772800
chr4:128924928-128925127	AluSx4_SINE_Alu	BIN_5410	0.411895	chr4:128924800-128925200
chr4:129256401-129256714	AluJr_SINE_Alu	BIN_5411	0.445402	chr4:129256400-129256800
chr4:129593471-129593635	AluSx_SINE_Alu	BIN_5413	0.436925	chr4:129593200-129593600
chr4:129710241-129710547	AluSx_SINE_Alu	BIN_5414	0.428265	chr4:129710000-129710400
chr4:129769330-129769629	AluSz_SINE_Alu	BIN_5415	0.428638	chr4:129769200-129769600
chr4:130427896-130428199	AluY_SINE_Alu	BIN_5416	0.453893	chr4:130428000-130428400
chr4:130441014-130441317	AluSq2_SINE_Alu	BIN_5417	0.416567	chr4:130440800-130441200
chr4:139968370-139968660	AluSq2_SINE_Alu	BIN_5423	0.440713	chr4:139968400-139968800
chr4:140087209-140087557	AluSx_SINE_Alu	BIN_5424	0.438081	chr4:140087200-140087600
chr4:140108039-140108518	AluSx_SINE_Alu,AluSx1_SINE_Alu	BIN_5425	0.440713	chr4:140108400-140108800
chr4:140256518-140256816	AluSx_SINE_Alu	BIN_5426	0.486797	chr4:140256400-140256800
chr4:140426460-140426757	AluSz_SINE_Alu	BIN_5427	0.487468	chr4:140426400-140426800
chr4:140445976-140446270	AluSx1_SINE_Alu	BIN_5428	0.481665	chr4:140446000-140446400
chr4:140598658-140598955	AluSp_SINE_Alu	BIN_5429	0.461973	chr4:140598800-140599200
chr4:141693810-141694113	AluSz_SINE_Alu	BIN_5430	0.443892	chr4:141694000-141694400
chr4:143073214-143073526	AluY_SINE_Alu	BIN_5431	0.429886	chr4:143073200-143073600
chr4:145973769-145974055	AluSc8_SINE_Alu	BIN_5434	0.421227	chr4:145973600-145974000
chr4:146165113-146165400	AluSx_SINE_Alu	BIN_5436	0.44857	chr4:146164800-146165200
chr4:148646605-148646921	AluSg_SINE_Alu	BIN_5439	0.439949	chr4:148646400-148646800
chr4:150914840-150915144	AluSc_SINE_Alu	BIN_5441	0.470704	chr4:150914800-150915200
chr4:151078436-151079080	AluJb_SINE_Alu,AluSz_SINE_Alu,AluJb_SINE_Alu	BIN_5442	0.479911	chr4:151078800-151079200
chr4:151651552-151652190	AluSz6_SINE_Alu,AluSz6_SINE_Alu	BIN_5443	0.560833	chr4:151652000-151652400
chr4:151958811-151959407	AluSz_SINE_Alu,AluJb_SINE_Alu	BIN_5444	0.428265	chr4:151959200-151959600
chr4:152230859-152231545	AluJb_SINE_Alu,AluJb_SINE_Alu,AluJr_SINE_Alu	BIN_5445	0.431304	chr4:152230800-152231200
chr4:152374776-152375049	AluSp_SINE_Alu	BIN_5446	0.432557	chr4:152374800-152375200
chr4:152755696-152755988	AluSc_SINE_Alu	BIN_5447	0.465533	chr4:152755600-152756000
chr4:154241779-154242082	AluSx1_SINE_Alu	BIN_5449	0.423589	chr4:154241600-154242000
chr4:154397114-154397410	AluSx_SINE_Alu	BIN_5450	0.458431	chr4:154397200-154397600
chr4:154433774-154434063	AluSc_SINE_Alu	BIN_5452	0.482325	chr4:154434000-154434400
chr4:156644779-156645113	AluSx1_SINE_Alu	BIN_5455	0.475246	chr4:156644800-156645200
chr4:157035551-157035841	AluSx3_SINE_Alu	BIN_5456	0.410405	chr4:157035600-157036000
chr4:157042608-157042917	AluSx_SINE_Alu	BIN_5457	0.485949	chr4:157042800-157043200
chr4:160048168-160048478	AluSq2_SINE_Alu	BIN_5466	0.554605	chr4:160048400-160048800
chr4:163739732-163740014	AluSz_SINE_Alu	BIN_5468	0.413056	chr4:163739600-163740000
chr4:164588782-164589077	AluSz_SINE_Alu	BIN_5469	0.473114	chr4:164588800-164589200
chr4:165893663-165893939	AluSz_SINE_Alu	BIN_5471	0.499236	chr4:165893600-165894000
chr4:166374123-166374408	AluSx3_SINE_Alu	BIN_5474	0.497073	chr4:166374400-166374800
chr4:169033891-169034203	AluSz_SINE_Alu	BIN_5476	0.489632	chr4:169034000-169034400
chr4:169093937-169094236	AluSq2_SINE_Alu	BIN_5477	0.43658	chr4:169094000-169094400
chr4:169707198-169707492	AluSc_SINE_Alu	BIN_5479	0.484704	chr4:169707200-169707600
chr4:169978657-169979266	AluJb_SINE_Alu,AluSc_SINE_Alu	BIN_5480	0.421398	chr4:169978400-169978800
chr4:170353957-170354510	AluSx1_SINE_Alu,AluSz6_SINE_Alu	BIN_5481	0.413932	chr4:170354000-170354400
chr4:170607570-170607865	AluSg_SINE_Alu	BIN_5483	0.416567	chr4:170607200-170607600
chr4:171208338-171208654	AluSp_SINE_Alu	BIN_5484	0.474577	chr4:171208400-171208800
chr4:173842664-173842973	AluSx1_SINE_Alu	BIN_5486	0.48017	chr4:173842800-173843200
chr4:175142930-175143255	AluSx1_SINE_Alu	BIN_5488	0.462541	chr4:175142800-175143200
chr4:176028926-176029218	AluSx1_SINE_Alu	BIN_5490	0.458826	chr4:176028800-176029200
chr4:176303211-176303518	AluSx_SINE_Alu	BIN_5491	0.417083	chr4:176303200-176303600
chr4:176658530-176658640	AluSq2_SINE_Alu	BIN_5492	0.474577	chr4:176658400-176658800
chr4:179826443-179826727	AluSz6_SINE_Alu	BIN_5494	0.486797	chr4:179826400-179826800
chr4:182489315-182489642	AluSx_SINE_Alu,AluSx_SINE_Alu	BIN_5496	0.428265	chr4:182489600-182490000
chr4:182543546-182543845	AluSx1_SINE_Alu	BIN_5497	0.449518	chr4:182543600-182544000
chr4:182997072-182997654	AluJr_SINE_Alu,AluSc_SINE_Alu	BIN_5498	0.431304	chr4:182997200-182997600
chr4:183195990-183196276	AluSz_SINE_Alu	BIN_5499	0.449518	chr4:183196000-183196400
chr4:183387576-183387772	AluJr_SINE_Alu	BIN_5501	0.458431	chr4:183387600-183388000
chr4:183974503-183974819	AluSz6_SINE_Alu	BIN_5503	0.494438	chr4:183974400-183974800
chr4:183988126-183988419	AluSg4_SINE_Alu	BIN_5504	0.427675	chr4:183988000-183988400
chr4:184267334-184267822	AluY_SINE_Alu,AluSx1_SINE_Alu	BIN_5505	0.481665	chr4:184267200-184267600
chr4:184538535-184538847	AluJb_SINE_Alu	BIN_5506	0.413056	chr4:184538400-184538800
chr4:184652633-184652928	AluSx_SINE_Alu	BIN_5507	0.445402	chr4:184652800-184653200
chr4:185534894-185535229	AluSq2_SINE_Alu	BIN_5509	0.476264	chr4:185535200-185535600
chr4:186242416-186242715	AluSx_SINE_Alu	BIN_5511	0.432557	chr4:186242400-186242800
chr4:186256191-186256470	AluSx_SINE_Alu	BIN_5512	0.416567	chr4:186256400-186256800
chr4:186286507-186286806	AluSq2_SINE_Alu	BIN_5513	0.419211	chr4:186286400-186286800
chr4:186289051-186289344	AluY_SINE_Alu	BIN_5514	0.439079	chr4:186289200-186289600
chr4:186871125-186871418	AluSx1_SINE_Alu	BIN_5515	0.44446	chr4:186871200-186871600
chr4:187274716-187275016	AluY_SINE_Alu	BIN_5516	0.443892	chr4:187274800-187275200
chr4:187688377-187688689	AluJb_SINE_Alu	BIN_5517	0.439949	chr4:187688400-187688800
chr4:187791422-187791715	AluSx1_SINE_Alu	BIN_5518	0.428265	chr4:187791200-187791600
chr4:187862728-187863039	AluSz_SINE_Alu	BIN_5519	0.426395	chr4:187862400-187862800
chr4:188003769-188004057	AluJr_SINE_Alu	BIN_5520	0.463182	chr4:188003600-188004000
chr4:188598391-188598677	AluSz6_SINE_Alu	BIN_5521	0.410481	chr4:188598400-188598800
chr4:189209328-189209629	AluSc_SINE_Alu	BIN_5522	0.489632	chr4:189209200-189209600
chr4:189576815-189577115	AluSx_SINE_Alu	BIN_5523	0.521508	chr4:189576800-189577200
chr4:189913167-189913478	AluSx3_SINE_Alu	BIN_5525	0.417083	chr4:189913200-189913600
chr5:3436826-3437120	AluSx4_SINE_Alu	BIN_5990	0.410405	chr5:3436800-3437200
chr5:3567106-3567405	AluSq2_SINE_Alu	BIN_5997	0.423589	chr5:3567200-3567600
chr5:10193432-10193733	AluSz_SINE_Alu	BIN_5718	0.429886	chr5:10193200-10193600
chr5:10947391-10947683	AluSz_SINE_Alu	BIN_5730	0.439079	chr5:10947600-10948000
chr5:14807218-14807521	AluSx_SINE_Alu	BIN_5850	0.557105	chr5:14807200-14807600
chr5:14828318-14828668	AluSx_SINE_Alu	BIN_5851	0.488603	chr5:14828000-14828400
chr5:14886697-14886992	AluSc8_SINE_Alu	BIN_5854	0.432557	chr5:14886800-14887200
chr5:16932911-16933167	AluJb_SINE_Alu	BIN_5908	0.429886	chr5:16932800-16933200
chr5:17003255-17003458	AluSx_SINE_Alu	BIN_5911	0.410405	chr5:17003200-17003600
chr5:17058855-17059082	AluJb_SINE_Alu	BIN_5914	0.441996	chr5:17058800-17059200
chr5:17066547-17066854	AluY_SINE_Alu	BIN_5915	0.434412	chr5:17066400-17066800
chr5:18467732-18468011	AluSx3_SINE_Alu	BIN_5964	0.454212	chr5:18468000-18468400
chr5:24823050-24823360	AluSp_SINE_Alu	BIN_5967	0.411895	chr5:24823200-24823600
chr5:25377644-25377936	AluSx_SINE_Alu	BIN_5968	0.44496	chr5:25377600-25378000
chr5:26425423-26425736	AluSq2_SINE_Alu	BIN_5969	0.414665	chr5:26425600-26426000
chr5:27512004-27512313	AluSc_SINE_Alu	BIN_5970	0.43367	chr5:27512000-27512400
chr5:28093499-28093810	AluSx_SINE_Alu	BIN_5972	0.453893	chr5:28093600-28094000
chr5:28253084-28253409	AluSz_SINE_Alu	BIN_5973	0.482325	chr5:28252800-28253200
chr5:28628962-28629265	AluY_SINE_Alu	BIN_5974	0.459279	chr5:28628800-28629200
chr5:28873440-28873731	AluSx_SINE_Alu	BIN_5975	0.428265	chr5:28873600-28874000
chr5:29844451-29844763	AluY_SINE_Alu	BIN_5976	0.413056	chr5:29844400-29844800
chr5:30619553-30619828	AluSx_SINE_Alu	BIN_5977	0.423132	chr5:30619600-30620000
chr5:31349989-31350608	AluSz_SINE_Alu,AluJr_SINE_Alu	BIN_5978	0.471834	chr5:31350400-31350800
chr5:31525019-31525635	AluSx_SINE_Alu,AluSx_SINE_Alu,AluSx_SINE_Alu	BIN_5979	0.416395	chr5:31525200-31525600
chr5:31975899-31976116	AluJr_SINE_Alu	BIN_5980	0.439079	chr5:31976000-31976400
chr5:32184709-32185338	AluSg7_SINE_Alu,AluSz_SINE_Alu	BIN_5981	0.438287	chr5:32184800-32185200
chr5:32459954-32460246	AluSz6_SINE_Alu	BIN_5982	0.421227	chr5:32460000-32460400
chr5:34215737-34216035	AluJr_SINE_Alu	BIN_5989	0.413678	chr5:34215600-34216000
chr5:34474258-34474544	AluSx_SINE_Alu	BIN_5991	0.523527	chr5:34474400-34474800
chr5:34805662-34805974	AluSx_SINE_Alu	BIN_5993	0.438287	chr5:34805600-34806000
chr5:34984287-34984599	AluYb8_SINE_Alu	BIN_5994	0.566598	chr5:34984400-34984800
chr5:35535290-35535610	AluSq_SINE_Alu	BIN_5996	0.429952	chr5:35535200-35535600
chr5:35823745-35824034	AluSz_SINE_Alu	BIN_5998	0.440713	chr5:35823600-35824000
chr5:36797470-36797769	AluSz_SINE_Alu	BIN_5999	0.423589	chr5:36797600-36798000
chr5:36867148-36867360	AluSz_SINE_Alu	BIN_6000	0.46916	chr5:36867200-36867600
chr5:37240171-37240480	AluSz_SINE_Alu	BIN_6001	0.425492	chr5:37240400-37240800
chr5:37333908-37334785	AluSp_SINE_Alu,AluJb_SINE_Alu,AluSx_SINE_Alu	BIN_6002	0.513397	chr5:37334000-37334400
chr5:38109363-38109677	AluSz_SINE_Alu	BIN_6004	0.62157	chr5:38109200-38109600
chr5:38336393-38336672	AluY_SINE_Alu	BIN_6005	0.439949	chr5:38336400-38336800
chr5:38354548-38354842	AluSx1_SINE_Alu	BIN_6006	0.428265	chr5:38354400-38354800
chr5:38507385-38507684	AluSx1_SINE_Alu	BIN_6007	0.434412	chr5:38507600-38508000
chr5:39026827-39027124	AluSp_SINE_Alu	BIN_6010	0.517933	chr5:39026800-39027200
chr5:39050428-39050737	AluSx3_SINE_Alu	BIN_6011	0.428638	chr5:39050400-39050800
chr5:40178963-40179270	AluSx3_SINE_Alu	BIN_6013	0.48366	chr5:40178800-40179200
chr5:40872914-40873158	AluSx1_SINE_Alu	BIN_6014	0.453813	chr5:40872800-40873200
chr5:41320594-41320897	AluY_SINE_Alu	BIN_6015	0.419058	chr5:41320800-41321200
chr5:43434532-43434863	AluSq2_SINE_Alu	BIN_6016	0.453893	chr5:43434400-43434800
chr5:43682307-43682610	AluSx_SINE_Alu	BIN_6017	0.413056	chr5:43682400-43682800
chr5:45237128-45237421	AluSg7_SINE_Alu	BIN_6020	0.485544	chr5:45237200-45237600
chr5:45304500-45304797	AluSg7_SINE_Alu	BIN_6021	0.425492	chr5:45304400-45304800
chr5:49732822-49733109	AluJb_SINE_Alu	BIN_6026	0.486797	chr5:49732800-49733200
chr5:50308602-50308932	AluSp_SINE_Alu	BIN_6027	0.438081	chr5:50308800-50309200
chr5:52145836-52146133	AluSg_SINE_Alu	BIN_6030	0.48366	chr5:52145600-52146000
chr5:52428436-52428736	AluSz_SINE_Alu	BIN_6031	0.413932	chr5:52428400-52428800
chr5:53599069-53599338	AluSz_SINE_Alu	BIN_6033	0.462541	chr5:53599200-53599600
chr5:53759612-53759879	AluJb_SINE_Alu	BIN_6034	0.434412	chr5:53759600-53760000
chr5:54861765-54862340	AluY_SINE_Alu,AluJr4_SINE_Alu	BIN_6037	0.41747	chr5:54862000-54862400
chr5:55255717-55256011	AluSg_SINE_Alu	BIN_6038	0.423132	chr5:55255600-55256000
chr5:55266233-55266766	AluJo_SINE_Alu,AluSx1_SINE_Alu	BIN_6039	0.421098	chr5:55266400-55266800
chr5:55699614-55699917	AluSq2_SINE_Alu	BIN_6041	0.499236	chr5:55699600-55700000
chr5:56161958-56162234	AluJo_SINE_Alu	BIN_6042	0.423589	chr5:56162000-56162400
chr5:56479592-56480072	AluJb_SINE_Alu,AluSz_SINE_Alu	BIN_6043	0.44857	chr5:56480000-56480400
chr5:56740044-56740348	AluSz_SINE_Alu	BIN_6045	0.439011	chr5:56740000-56740400
chr5:57470576-57470857	AluJb_SINE_Alu	BIN_6046	0.416567	chr5:57470800-57471200
chr5:60131227-60131539	AluJr_SINE_Alu	BIN_6050	0.434412	chr5:60131200-60131600
chr5:60663665-60663958	AluJb_SINE_Alu	BIN_6051	0.476679	chr5:60663600-60664000
chr5:60863959-60864270	AluSp_SINE_Alu	BIN_6052	0.488465	chr5:60864000-60864400
chr5:61509575-61509787	AluSz_SINE_Alu	BIN_6053	0.416567	chr5:61509600-61510000
chr5:61693479-61693758	AluY_SINE_Alu	BIN_6054	0.418849	chr5:61693200-61693600
chr5:61867515-61867812	AluSx_SINE_Alu	BIN_6055	0.439949	chr5:61867600-61868000
chr5:61895883-61896172	AluSx1_SINE_Alu	BIN_6056	0.566598	chr5:61895600-61896000
chr5:62027688-62028004	AluSx1_SINE_Alu	BIN_6058	0.429952	chr5:62028000-62028400
chr5:62275530-62275813	AluSz_SINE_Alu	BIN_6059	0.439079	chr5:62275600-62276000
chr5:64787586-64788207	AluJr4_SINE_Alu,AluSx_SINE_Alu	BIN_6061	0.435565	chr5:64788000-64788400
chr5:65774211-65774840	AluSx_SINE_Alu,AluY_SINE_Alu	BIN_6063	0.437482	chr5:65774400-65774800
chr5:66067001-66067313	AluY_SINE_Alu	BIN_6064	0.421227	chr5:66067200-66067600
chr5:67669539-67669865	AluSz6_SINE_Alu	BIN_6065	0.658328	chr5:67669600-67670000
chr5:68367199-68367496	AluJo_SINE_Alu	BIN_6066	0.417083	chr5:68367200-68367600
chr5:68618269-68619148	AluJb_SINE_Alu,AluSg_SINE_Alu,AluJb_SINE_Alu,AluSz_SINE_Alu	BIN_6067	0.505836	chr5:68618400-68618800
chr5:68766009-68766286	AluSq2_SINE_Alu	BIN_6068	0.439949	chr5:68766000-68766400
chr5:70765439-70766055	AluSz_SINE_Alu,AluSp_SINE_Alu,AluSz_SINE_Alu	BIN_6069	0.413056	chr5:70765600-70766000
chr5:71027234-71027529	AluJr_SINE_Alu	BIN_6070	0.427162	chr5:71027200-71027600
chr5:71326798-71327110	AluSz6_SINE_Alu	BIN_6071	0.421227	chr5:71326800-71327200
chr5:71327681-71328002	AluSc8_SINE_Alu	BIN_6072	0.478233	chr5:71328000-71328400
chr5:72347385-72347696	AluSz_SINE_Alu	BIN_6075	0.475725	chr5:72347600-72348000
chr5:72544231-72544532	AluSx1_SINE_Alu	BIN_6077	0.48017	chr5:72544400-72544800
chr5:73077981-73078291	AluSx_SINE_Alu	BIN_6078	0.4697	chr5:73078000-73078400
chr5:73888938-73889545	AluSx1_SINE_Alu,AluSx3_SINE_Alu	BIN_6080	0.428638	chr5:73888800-73889200
chr5:74542765-74543374	AluSp_SINE_Alu,AluSx1_SINE_Alu	BIN_6081	0.531455	chr5:74542800-74543200
chr5:75608077-75608377	AluSx1_SINE_Alu	BIN_6082	0.458826	chr5:75608000-75608400
chr5:75646558-75646852	AluSc_SINE_Alu	BIN_6083	0.476679	chr5:75646400-75646800
chr5:75649956-75650779	AluSg_SINE_Alu,AluSg4_SINE_Alu,AluSz_SINE_Alu	BIN_6084	0.43658	chr5:75650400-75650800
chr5:75669089-75669398	AluSx1_SINE_Alu	BIN_6085	0.453893	chr5:75668800-75669200
chr5:75691494-75691803	AluJb_SINE_Alu	BIN_6086	0.44446	chr5:75691200-75691600
chr5:75780675-75780941	AluJr_SINE_Alu	BIN_6087	0.498104	chr5:75780800-75781200
chr5:76075618-76076631	AluJb_SINE_Alu,AluJb_SINE_Alu,AluSc5_SINE_Alu,AluJb_SINE_Alu,AluJr_SINE_Alu	BIN_6088	0.517933	chr5:76076400-76076800
chr5:76234975-76235276	AluY_SINE_Alu	BIN_6089	0.453984	chr5:76235200-76235600
chr5:76355667-76355966	AluSg_SINE_Alu	BIN_6090	0.479911	chr5:76355600-76356000
chr5:76613685-76613902	AluSg7_SINE_Alu	BIN_6091	0.742759	chr5:76613600-76614000
chr5:77249025-77249331	AluSx1_SINE_Alu	BIN_6092	0.426395	chr5:77248800-77249200
chr5:77336816-77337390	AluSp_SINE_Alu,AluJb_SINE_Alu	BIN_6093	0.434412	chr5:77337200-77337600
chr5:77605827-77605995	AluJb_SINE_Alu	BIN_6094	0.419058	chr5:77605600-77606000
chr5:78337535-78337842	AluSq_SINE_Alu	BIN_6096	0.461467	chr5:78337600-78338000
chr5:78381221-78381540	AluSx1_SINE_Alu	BIN_6097	0.592042	chr5:78381200-78381600
chr5:78460053-78461481	AluSz6_SINE_Alu,AluSx_SINE_Alu,AluSc_SINE_Alu,AluSx1_SINE_Alu,AluSz_SINE_Alu	BIN_6098	0.547299	chr5:78461200-78461600
chr5:78522294-78522589	AluSx3_SINE_Alu	BIN_6099	0.47697	chr5:78522400-78522800
chr5:78543733-78544087	AluSx_SINE_Alu,AluSx_SINE_Alu	BIN_6100	0.411531	chr5:78544000-78544400
chr5:78609694-78609981	AluSx1_SINE_Alu	BIN_6101	0.463182	chr5:78609600-78610000
chr5:79937698-79938011	AluY_SINE_Alu	BIN_6103	0.473974	chr5:79937600-79938000
chr5:79969066-79969378	AluJb_SINE_Alu	BIN_6104	0.414665	chr5:79968800-79969200
chr5:79975798-79976097	AluSx1_SINE_Alu	BIN_6105	0.458826	chr5:79976000-79976400
chr5:80678932-80679203	AluSx1_SINE_Alu	BIN_6106	0.564611	chr5:80678800-80679200
chr5:81054982-81055271	AluSc_SINE_Alu	BIN_6107	0.468075	chr5:81055200-81055600
chr5:81533180-81533476	AluSx_SINE_Alu	BIN_6108	0.432557	chr5:81533200-81533600
chr5:81706761-81707071	AluSx1_SINE_Alu	BIN_6109	0.410405	chr5:81706800-81707200
chr5:82204326-82204596	AluSc_SINE_Alu	BIN_6110	0.459804	chr5:82204000-82204400
chr5:82282614-82282898	AluSx_SINE_Alu	BIN_6112	0.414665	chr5:82282400-82282800
chr5:83598128-83598413	AluY_SINE_Alu	BIN_6114	0.492082	chr5:83598000-83598400
chr5:86581423-86581735	AluSx_SINE_Alu	BIN_6116	0.43367	chr5:86581600-86582000
chr5:86805789-86806093	AluSc5_SINE_Alu	BIN_6118	0.439079	chr5:86805600-86806000
chr5:89778675-89778981	AluSp_SINE_Alu	BIN_6122	0.416567	chr5:89778400-89778800
chr5:90761688-90761979	AluSx_SINE_Alu	BIN_6124	0.426324	chr5:90761600-90762000
chr5:92113457-92113766	AluSc8_SINE_Alu	BIN_6125	0.46916	chr5:92113200-92113600
chr5:92963144-92963445	AluSg_SINE_Alu	BIN_6127	0.626685	chr5:92963200-92963600
chr5:93269548-93269725	AluSc_SINE_Alu	BIN_6128	0.458083	chr5:93269600-93270000
chr5:94241907-94242207	AluJb_SINE_Alu	BIN_6129	0.484704	chr5:94242000-94242400
chr5:100467537-100468149	AluSx_SINE_Alu,AluSx1_SINE_Alu,AluSx_SINE_Alu	BIN_5716	0.485949	chr5:100468000-100468400
chr5:102165067-102165377	AluY_SINE_Alu	BIN_5719	0.414665	chr5:102165200-102165600
chr5:102431343-102431646	AluSz6_SINE_Alu	BIN_5720	0.44496	chr5:102431600-102432000
chr5:102708914-102709211	AluSq_SINE_Alu	BIN_5721	0.442477	chr5:102709200-102709600
chr5:103152586-103152894	AluSx3_SINE_Alu	BIN_5722	0.431567	chr5:103152800-103153200
chr5:107780612-107780899	AluJo_SINE_Alu	BIN_5725	0.421398	chr5:107780800-107781200
chr5:107803956-107804264	AluSx3_SINE_Alu	BIN_5726	0.439079	chr5:107804000-107804400
chr5:109135173-109135807	AluSp_SINE_Alu,AluSx_SINE_Alu	BIN_5729	0.533119	chr5:109135200-109135600
chr5:111990114-111990393	AluSz_SINE_Alu	BIN_5734	0.557105	chr5:111990000-111990400
chr5:112152554-112152866	AluSx_SINE_Alu	BIN_5735	0.454212	chr5:112152800-112153200
chr5:112184200-112184582	AluJr_SINE_Alu,AluJr_SINE_Alu	BIN_5736	0.425492	chr5:112184400-112184800
chr5:112292186-112292497	AluSz6_SINE_Alu	BIN_5738	0.464751	chr5:112292000-112292400
chr5:113757000-113757238	AluSx1_SINE_Alu	BIN_5739	0.482853	chr5:113757200-113757600
chr5:114305795-114306105	AluSq2_SINE_Alu	BIN_5740	0.425492	chr5:114306000-114306400
chr5:115399416-115399723	AluJo_SINE_Alu	BIN_5742	0.429886	chr5:115399200-115399600
chr5:115819477-115819782	AluSx1_SINE_Alu	BIN_5744	0.424214	chr5:115819200-115819600
chr5:115879978-115880294	AluJb_SINE_Alu	BIN_5745	0.470704	chr5:115880000-115880400
chr5:116717919-116718232	AluSz_SINE_Alu	BIN_5747	0.413678	chr5:116717600-116718000
chr5:116743519-116743814	AluSz_SINE_Alu	BIN_5748	0.417083	chr5:116743600-116744000
chr5:117053419-117053729	AluSx1_SINE_Alu	BIN_5749	0.485949	chr5:117053600-117054000
chr5:117771874-117772191	AluSq_SINE_Alu	BIN_5751	0.453893	chr5:117772000-117772400
chr5:118620112-118620390	AluSz6_SINE_Alu	BIN_5753	0.419211	chr5:118620000-118620400
chr5:121233894-121234143	AluJb_SINE_Alu	BIN_5757	0.442477	chr5:121234000-121234400
chr5:121874190-121874490	AluSq2_SINE_Alu	BIN_5759	0.413678	chr5:121874400-121874800
chr5:122367508-122367791	AluSz6_SINE_Alu	BIN_5761	0.487468	chr5:122367600-122368000
chr5:122457065-122457231	AluJr_SINE_Alu	BIN_5762	0.416567	chr5:122456800-122457200
chr5:125328286-125328578	AluSz_SINE_Alu	BIN_5763	0.47041	chr5:125328400-125328800
chr5:125347847-125348126	AluJb_SINE_Alu	BIN_5764	0.486797	chr5:125348000-125348400
chr5:125667377-125667678	AluSz_SINE_Alu	BIN_5765	0.429784	chr5:125667600-125668000
chr5:125990090-125990396	AluSz6_SINE_Alu	BIN_5766	0.432557	chr5:125990000-125990400
chr5:126336378-126336941	AluY_SINE_Alu,AluSg_SINE_Alu	BIN_5767	0.438081	chr5:126336800-126337200
chr5:126974489-126974781	AluSz6_SINE_Alu	BIN_5768	0.462541	chr5:126974400-126974800
chr5:127253551-127253852	AluJb_SINE_Alu	BIN_5769	0.449107	chr5:127253600-127254000
chr5:128486638-128486940	AluY_SINE_Alu	BIN_5770	0.476679	chr5:128486400-128486800
chr5:128730211-128730503	AluY_SINE_Alu	BIN_5771	0.463913	chr5:128730400-128730800
chr5:129944328-129944543	AluY_SINE_Alu	BIN_5772	0.425492	chr5:129944400-129944800
chr5:129973748-129974068	AluSx3_SINE_Alu	BIN_5773	0.453813	chr5:129973600-129974000
chr5:130498537-130498827	AluSx_SINE_Alu	BIN_5775	0.423132	chr5:130498400-130498800
chr5:130625083-130625379	AluY_SINE_Alu	BIN_5776	0.439079	chr5:130624800-130625200
chr5:130726095-130726378	AluSz_SINE_Alu	BIN_5777	0.411676	chr5:130726000-130726400
chr5:131022797-131023098	AluJb_SINE_Alu	BIN_5779	0.453743	chr5:131022800-131023200
chr5:132030854-132031163	AluSz_SINE_Alu	BIN_5782	0.437482	chr5:132030800-132031200
chr5:132288303-132288609	AluSz6_SINE_Alu	BIN_5783	0.501215	chr5:132288400-132288800
chr5:132296633-132297215	AluSx3_SINE_Alu,AluSc8_SINE_Alu,AluSx_SINE_Alu	BIN_5784	0.494556	chr5:132296800-132297200
chr5:132317446-132318079	AluSz_SINE_Alu,AluSc_SINE_Alu	BIN_5785	0.498685	chr5:132317600-132318000
chr5:132320818-132321113	AluSc_SINE_Alu	BIN_5786	0.435565	chr5:132320800-132321200
chr5:132360315-132360612	AluSx1_SINE_Alu	BIN_5787	0.461012	chr5:132360400-132360800
chr5:132363563-132363872	AluSp_SINE_Alu	BIN_5788	0.512045	chr5:132363600-132364000
chr5:132486253-132486565	AluSp_SINE_Alu	BIN_5790	0.421227	chr5:132486000-132486400
chr5:132507060-132507660	AluSx1_SINE_Alu,AluSz_SINE_Alu	BIN_5791	0.429952	chr5:132507200-132507600
chr5:133614335-133614588	AluSx_SINE_Alu	BIN_5792	0.471834	chr5:133614400-133614800
chr5:133652824-133653938	AluSx_SINE_Alu,FRAM_SINE_Alu,AluJb_SINE_Alu,AluSp_SINE_Alu	BIN_5793	0.457774	chr5:133653600-133654000
chr5:133769922-133770420	AluSx1_SINE_Alu,AluSc8_SINE_Alu	BIN_5796	0.410481	chr5:133770400-133770800
chr5:133954406-133955349	AluSz6_SINE_Alu,AluSx_SINE_Alu,AluJo_SINE_Alu	BIN_5797	0.462541	chr5:133955200-133955600
chr5:134025715-134026304	AluSq2_SINE_Alu,AluJr_SINE_Alu	BIN_5798	0.453743	chr5:134025600-134026000
chr5:134155229-134155524	AluJo_SINE_Alu	BIN_5799	0.487468	chr5:134155200-134155600
chr5:134567938-134568473	AluSx_SINE_Alu,AluJo_SINE_Alu	BIN_5800	0.542241	chr5:134568000-134568400
chr5:134867012-134867310	AluSx_SINE_Alu	BIN_5801	0.426395	chr5:134867200-134867600
chr5:135016661-135016961	AluSp_SINE_Alu	BIN_5802	0.554128	chr5:135016400-135016800
chr5:135518907-135519208	AluSx_SINE_Alu	BIN_5803	0.415953	chr5:135518800-135519200
chr5:137074120-137074419	AluSx_SINE_Alu	BIN_5805	0.492207	chr5:137074000-137074400
chr5:137552113-137552411	AluSx_SINE_Alu	BIN_5806	0.496707	chr5:137552000-137552400
chr5:137583826-137584435	AluSx_SINE_Alu,AluSq2_SINE_Alu	BIN_5807	0.410481	chr5:137584000-137584400
chr5:137589864-137590175	AluSx_SINE_Alu	BIN_5808	0.414665	chr5:137589600-137590000
chr5:137591311-137592246	AluSz6_SINE_Alu,AluSx1_SINE_Alu,AluSc8_SINE_Alu	BIN_5809	0.479911	chr5:137591600-137592000
chr5:137615470-137616325	AluJr_SINE_Alu,AluSx_SINE_Alu,AluSc_SINE_Alu,AluSx_SINE_Alu	BIN_5810	0.475725	chr5:137615600-137616000
chr5:137631017-137631328	AluJb_SINE_Alu	BIN_5811	0.433093	chr5:137630800-137631200
chr5:137637394-137637985	AluSx_SINE_Alu,AluSz_SINE_Alu	BIN_5812	0.547066	chr5:137637600-137638000
chr5:137700939-137701246	AluSq2_SINE_Alu	BIN_5813	0.415394	chr5:137701200-137701600
chr5:137709158-137709472	AluJr_SINE_Alu	BIN_5814	0.411676	chr5:137709200-137709600
chr5:137732592-137733565	AluJb_SINE_Alu,AluY_SINE_Alu,AluJb_SINE_Alu,AluSz_SINE_Alu	BIN_5815	0.439666	chr5:137733200-137733600
chr5:137927735-137928031	AluSx1_SINE_Alu	BIN_5816	0.44496	chr5:137927600-137928000
chr5:137953153-137953761	AluSx_SINE_Alu,AluJb_SINE_Alu	BIN_5817	0.453625	chr5:137953200-137953600
chr5:137957339-137957667	AluSx_SINE_Alu	BIN_5818	0.438081	chr5:137957600-137958000
chr5:138066156-138066444	AluSp_SINE_Alu	BIN_5819	0.443237	chr5:138066400-138066800
chr5:138069657-138069949	AluSc5_SINE_Alu	BIN_5820	0.426324	chr5:138069600-138070000
chr5:138174907-138175189	AluSx1_SINE_Alu	BIN_5821	0.488014	chr5:138174800-138175200
chr5:138502068-138502948	AluJo_SINE_Alu,AluJb_SINE_Alu,AluY_SINE_Alu,AluJb_SINE_Alu	BIN_5822	0.503033	chr5:138502400-138502800
[truncated: 5,872 more rows]

## Sheet: DamIP-seq (Other loci, SS)
Feature Position	Feature	BIN name	MAF1 DamIP-seq score	Peak position
Pol II genes
chr6:21666674-22194616	NR_015410|FLJ22536|+	BIN_1056	0.999999	chr6:21906400-21906800
chr6:38874270-38920883	NR_038401|LOC100131047|-	BIN_1089	0.797112	chr6:38891200-38891600
chr6:146056004-146207721	NR_038246|LOC100507557|+	BIN_1044	0.900464	chr6:146134000-146134400
chr7:11013498-11147376	NR_033435|PHF14|+	BIN_1128	0.862782	chr7:11128000-11128400
chr11:3022151-3078681	NR_036542|CARS|-	BIN_1375	0.862782	chr11:3074000-3074400
chr17:70594179-70636611	NR_033876|FLJ26484|-	BIN_477	0.935945	chr17:70613200-70613600
chr1:16268364-16302627	ZBTB17|-	BIN_107	0.95109	chr1:16297600-16298000
chr1:64239693-64647181	ROR1|+	BIN_413	0.875785	chr1:64615600-64616000
chr1:67773047-67862583	IL12RB2|+	BIN_434	0.846588	chr1:67808000-67808400
chr1:113009163-113065288	WNT2B|+	BIN_66	0.812156	chr1:113045200-113045600
chr1:154192655-154243986	UBAP2L|+	BIN_96	0.842916	chr1:154215200-154215600
chr1:171810621-172387606	DNM3|+	BIN_112	0.839219	chr1:172258800-172259200
chr1:207494853-207534311	CD55|+	BIN_139	1.0492	chr1:207532400-207532800
chr1:220701568-220837803	MARK1|+	BIN_163	0.900464	chr1:220793200-220793600
chr2:27650657-27665126	NRBP1|+	BIN_731	0.812156	chr2:27658000-27658400
chr2:160628362-160761221	LY75-CD302|-	BIN_662	0.812705	chr2:160699200-160699600
chr2:165944032-166060577	SCN3A|-	BIN_664	0.894322	chr2:165973200-165973600
chr2:191745553-191830278	GLS|+	BIN_677	0.847996	chr2:191764000-191764400
chr2:209224438-209719227	PTH2R|+	BIN_689	0.812156	chr2:209671600-209672000
chr2:223725652-223809357	ACSL3|+	BIN_699	0.958998	chr2:223809200-223809600
chr3:17199899-18486309	TBC1D5|-	BIN_807	0.797112	chr3:18178400-18178800
chr3:39850405-40301812	MYRIP|+	BIN_826	0.812156	chr3:40152000-40152400
chr3:41288090-42003922	ULK4|-	BIN_829	0.915168	chr3:41789600-41790000
chr3:62384021-62861064	CADPS|-	BIN_837	0.921589	chr3:62395600-62396000
chr3:71728440-71803924	EIF4E3|-	BIN_841	0.82848	chr3:71752800-71753200
chr3:115528641-117716095	LSAMP|-	BIN_768	0.823388	chr3:116825600-116826000
chr3:115528641-117716095	LSAMP|-	BIN_770	0.812156	chr3:117182000-117182400
chr3:170779128-171178197	TNIK|-	BIN_803	0.812156	chr3:170868400-170868800
chr3:186435065-186461743	KNG1|+	BIN_808	0.855774	chr3:186436000-186436400
chr4:73939093-74124515	ANKRD17|-	BIN_935	0.797112	chr4:74087200-74087600
chr4:95679119-96079599	BMPR1B|+	BIN_944	0.842916	chr4:95906400-95906800
chr4:101944566-102269435	PPP3CA|-	BIN_858	0.88731	chr4:102020800-102021200
chr4:109571740-109588976	OSTC|+	BIN_861	0.812156	chr4:109579600-109580000
chr4:114372188-114683083	CAMK2D|-	BIN_862	0.862782	chr4:114604000-114604400
chr4:115748919-116035032	NDST4|-	BIN_864	0.900464	chr4:116033200-116033600
chr4:142944313-143768585	INPP4B|-	BIN_877	0.862782	chr4:143227200-143227600
chr4:167654535-168155947	SPOCK3|-	BIN_892	0.847996	chr4:168001200-168001600
chr4:172733405-173962710	GALNTL6|+	BIN_895	0.855774	chr4:173819200-173819600
chr5:19473060-20575982	CDH18|-	BIN_985	0.95109	chr5:19884400-19884800
chr5:23951457-24178372	C5orf17|+	BIN_991	1.16063	chr5:24074400-24074800
chr5:42423879-42721979	GHR|+	BIN_1002	0.812156	chr5:42462800-42463200
chr5:57878048-58155213	RAB3C|+	BIN_1006	0.812156	chr5:58092800-58093200
chr5:81267844-81572241	ATG10|+	BIN_1014	0.847996	chr5:81514000-81514400
chr5:96271098-96373219	LNPEP|+	BIN_1020	0.812156	chr5:96274000-96274400
chr5:108083523-108532542	FER|+	BIN_950	0.847996	chr5:108463600-108464000
chr6:38136227-38607924	BTBD9|-	BIN_1088	0.88731	chr6:38374000-38374400
chr6:40359325-40555204	LRFN2|-	BIN_1091	0.803174	chr6:40548400-40548800
chr6:64429876-66417118	EYS|-	BIN_1101	0.826659	chr6:65384400-65384800
chr6:134490384-134639250	SGK1|-	BIN_1033	0.812156	chr6:134510400-134510800
chr7:5566782-5603415	ACTB|-	BIN_1164	0.88731	chr7:5578400-5578800
chr7:26706681-27034858	SKAP2|-	BIN_1156	0.938236	chr7:26996800-26997200
chr7:84624869-84816171	SEMA3D|-	BIN_1185	0.812156	chr7:84726800-84727200
chr7:90095738-90839905	CDK14|+	BIN_1189	0.812156	chr7:90377200-90377600
chr7:151253210-151574210	PRKAG2|-	BIN_1148	0.812172	chr7:151571200-151571600
chr8:2792992-4852494	CSMD1|-	BIN_1238	0.797112	chr8:4231200-4231600
chr8:2792992-4852494	CSMD1|-	BIN_1241	0.862782	chr8:4809600-4810000
chr8:8859657-8974256	ERI1|+	BIN_1264	0.847996	chr8:8868400-8868800
chr8:24241798-24263526	ADAMDEC1|+	BIN_1224	1.0492	chr8:24253200-24253600
chr8:69242957-69731257	C8orf34|+	BIN_1252	0.846588	chr8:69609200-69609600
chr8:82370576-82373814	FABP9|-	BIN_1261	0.847996	chr8:82373200-82373600
chr8:95653302-95719694	ESRP1|+	BIN_1267	0.847996	chr8:95716000-95716400
chr8:144451057-144466390	RHPN1|+	BIN_1220	0.847996	chr8:144459200-144459600
chr9:35814448-35854844	TMEM8B|+	BIN_1290	0.847996	chr9:35827200-35827600
chr10:320130-735683	DIP2C|-	BIN_31	0.903523	chr10:562400-562800
chr10:6130949-6159420	RBM17|+	BIN_35	0.847996	chr10:6154000-6154400
chr10:13685706-14504141	FRMD4A|-	BIN_14	0.922735	chr10:14491600-14492000
chr10:16865963-17171830	CUBN|-	BIN_16	0.911692	chr10:17010000-17010400
chr10:26726706-26856732	APBB1IP|+	BIN_21	0.900464	chr10:26737600-26738000
chr10:34398488-35104253	PARD3|-	BIN_25	0.847996	chr10:34755600-34756000
chr10:55562531-57387702	PCDH15|-	BIN_32	0.842916	chr10:56778400-56778800
chr10:61410523-61495760	SLC16A9|-	BIN_34	0.922713	chr10:61441200-61441600
chr10:92631473-92668312	RPP30|+	BIN_47	0.82848	chr10:92654800-92655200
chr11:1874200-1913497	LSP1|+	BIN_74	0.797112	chr11:1885200-1885600
chr11:24518516-25104150	LUZP2|+	BIN_76	0.812156	chr11:24812800-24813200
chr11:72547790-72853306	FCHSD2|-	BIN_113	0.797112	chr11:72710800-72711200
chr12:10103915-10168330	CLEC12A|+	BIN_140	0.799691	chr12:10136400-10136800
chr12:50505762-50559203	C12orf62|+	BIN_193	0.862782	chr12:50554400-50554800
chr12:95470525-95611258	FGD6|-	BIN_227	0.88731	chr12:95536800-95537200
chr12:119616447-119658936	HSPB8|+	BIN_147	0.812156	chr12:119626800-119627200
chr12:128751948-129192460	TMEM132C|+	BIN_152	0.887111	chr12:128867200-128867600
chr13:43787654-44361044	ENOX1|-	BIN_259	0.812156	chr13:43901200-43901600
chr13:72012098-72441330	DACH1|-	BIN_273	0.797112	chr13:72402800-72403200
chr13:73356197-73590592	PIBF1|+	BIN_274	0.82848	chr13:73383200-73383600
chr13:101706130-102068843	NALCN|-	BIN_235	0.855774	chr13:101924400-101924800
chr14:23527776-23564823	ACIN1|-	BIN_297	0.812156	chr14:23556400-23556800
chr14:26912299-27066960	NOVA1|-	BIN_299	0.847996	chr14:27060800-27061200
chr14:30045687-30661104	PRKD1|-	BIN_305	0.847996	chr14:30390800-30391200
chr14:60062694-60337684	RTN1|-	BIN_319	0.826659	chr14:60150800-60151200
chr15:57668703-57842925	CGNL1|+	BIN_355	0.812156	chr15:57734400-57734800
chr16:30968615-30995985	SETD1A|+	BIN_388	0.876574	chr16:30970000-30970400
chr16:30968615-30995985	SETD1A|+	BIN_389	1.25869	chr16:30972400-30972800
chr16:30968615-30995985	SETD1A|+	BIN_391	1.21443	chr16:30976000-30976400
chr16:30968615-30995985	SETD1A|+	BIN_392	0.976245	chr16:30976400-30976800
chr16:30968615-30995985	SETD1A|+	BIN_393	1.42413	chr16:30977200-30977600
chr16:30968615-30995985	SETD1A|+	BIN_396	0.855944	chr16:30982400-30982800
chr16:30968615-30995985	SETD1A|+	BIN_397	1.12423	chr16:30982800-30983200
chr16:30968615-30995985	SETD1A|+	BIN_398	1.17674	chr16:30990400-30990800
chr16:30968615-30995985	SETD1A|+	BIN_399	0.93714	chr16:30990800-30991200
chr16:30968615-30995985	SETD1A|+	BIN_400	1.16012	chr16:30991200-30991600
chr16:30968615-30995985	SETD1A|+	BIN_401	0.915227	chr16:30991600-30992000
chr16:30968615-30995985	SETD1A|+	BIN_402	0.836409	chr16:30992000-30992400
chr16:30968615-30995985	SETD1A|+	BIN_403	1.01862	chr16:30994800-30995200
chr16:30968615-30995985	SETD1A|+	BIN_404	1.37135	chr16:30995200-30995600
chr16:46741427-46797158	MYLK3|-	BIN_414	0.875785	chr16:46763600-46764000
chr16:84733555-84813525	USP10|+	BIN_436	0.88731	chr16:84790800-84791200
chr17:28804426-28853837	GOSR1|+	BIN_449	0.875785	chr17:28821200-28821600
chr17:37793318-37820454	STARD3|+	BIN_456	0.82848	chr17:37815200-37815600
chr17:77085427-77613550	RBFOX3|-	BIN_482	0.812156	chr17:77329200-77329600
chr18:22641888-22932214	ZNF521|-	BIN_495	0.862782	chr18:22896000-22896400
chr18:42260138-42648475	SETBP1|+	BIN_509	0.82848	chr18:42579600-42580000
chr18:66401969-66722426	CCDC102B|+	BIN_525	0.799691	chr18:66576000-66576400
chr19:17212466-17324103	MYO9B|+	BIN_537	0.797112	chr19:17256800-17257200
chr20:13976015-16033842	MACROD2|+	BIN_563	0.797112	chr20:15271200-15271600
chr20:13976015-16033842	MACROD2|+	BIN_565	0.842916	chr20:15845600-15846000
chr20:17937623-18039832	OVOL2|-	BIN_567	0.855774	chr20:18015200-18015600
chr20:58438621-58508710	SYCP2|-	BIN_604	0.95109	chr20:58477600-58478000
chr20:58438621-58508710	SYCP2|-	BIN_605	0.797112	chr20:58496800-58497200
chr21:17102344-17252377	USP25|+	BIN_619	0.812156	chr21:17203200-17203600
chr21:22370633-22915650	NCAM2|+	BIN_626	0.812156	chr21:22747600-22748000
chr22:46971909-47075688	GRAMD4|+	BIN_725	0.797112	chr22:47035200-47035600
chrX:31132808-33357558	DMD|-	BIN_1345	0.82848	chrX:32720400-32720800
chrX:110187513-110464173	PAK3|+	BIN_1311	0.923468	chrX:110348400-110348800
chrX:132669773-133119922	GPC3|-	BIN_1324	0.812156	chrX:132982000-132982400
chrX:150732094-150845211	PASD1|+	BIN_1334	0.812156	chrX:150808400-150808800
chr19:46984044-47104457	NM_001205281	BIN_552	0.945304	chr19:47007200-47007600
Repeats
chr1:1331276-1332541	AluSx1_SINE_Alu,AluYk11_SINE_Alu,AluSx_SINE_Alu,AluSx_SINE_Alu,AluY_SINE_Alu,AluSx_SINE_Alu	BIN_82	0.862782	chr1:1331600-1332000
chr1:1427291-1428498	AluJr_SINE_Alu,AluSx1_SINE_Alu,AluSx_SINE_Alu,AluSx3_SINE_Alu,AluSx_SINE_Alu	BIN_86	0.847996	chr1:1427600-1428000
chr1:3366613-3366871	AluJo_SINE_Alu	BIN_252	0.82848	chr1:3366400-3366800
chr1:4954035-4954327	AluSz_SINE_Alu	BIN_334	0.82848	chr1:4954000-4954400
chr1:8579153-8579499	AluJo_SINE_Alu	BIN_517	0.862782	chr1:8579200-8579600
chr1:9742064-9742899	AluJb_SINE_Alu,AluSq_SINE_Alu,AluSx_SINE_Alu	BIN_558	0.930378	chr1:9742800-9743200
chr1:10302585-10302872	AluSg_SINE_Alu	BIN_51	0.875785	chr1:10302400-10302800
chr1:23701965-23702857	AluJb_SINE_Alu,AluSx_SINE_Alu,AluJb_SINE_Alu,AluJo_SINE_Alu	BIN_176	0.82848	chr1:23702000-23702400
chr1:27983663-27984619	AluSq2_SINE_Alu,AluJb_SINE_Alu,AluSp_SINE_Alu,AluJb_SINE_Alu	BIN_210	0.875785	chr1:27983600-27984000
chr1:28257994-28258296	AluY_SINE_Alu	BIN_217	0.911692	chr1:28258000-28258400
chr1:28425160-28425482	AluSx_SINE_Alu	BIN_219	0.847996	chr1:28425200-28425600
chr1:33312206-33312680	FRAM_SINE_Alu,AluSp_SINE_Alu	BIN_248	0.900464	chr1:33312000-33312400
chr1:39489344-39489647	AluSq2_SINE_Alu	BIN_286	0.958998	chr1:39489200-39489600
chr1:43652000-43652309	AluYk4_SINE_Alu	BIN_309	0.95109	chr1:43652000-43652400
chr1:54360815-54361107	AluSg_SINE_Alu	BIN_347	0.875785	chr1:54360800-54361200
chr1:66738459-66738737	AluSc_SINE_Alu	BIN_426	1.05087	chr1:66738400-66738800
chr1:69064123-69064425	AluSq2_SINE_Alu	BIN_437	0.862782	chr1:69064000-69064400
chr1:72911427-72911735	AluY_SINE_Alu	BIN_450	0.813667	chr1:72911600-72912000
chr1:76038525-76038839	AluSx_SINE_Alu	BIN_471	0.82848	chr1:76038400-76038800
chr1:80087999-80088297	AluSx_SINE_Alu	BIN_488	0.82848	chr1:80087600-80088000
chr1:97163898-97164141	AluJb_SINE_Alu	BIN_557	0.847996	chr1:97164000-97164400
chr1:103081864-103082178	AluY_SINE_Alu	BIN_52	0.930378	chr1:103082000-103082400
chr1:111055511-111055822	AluY_SINE_Alu	BIN_60	0.900464	chr1:111055600-111056000
chr1:114504286-114504591	AluSg_SINE_Alu	BIN_70	0.812156	chr1:114504400-114504800
chr1:115846798-115847094	AluSx_SINE_Alu	BIN_72	0.862782	chr1:115846800-115847200
chr1:142598097-142598317	AluYk4_SINE_Alu	BIN_85	0.842916	chr1:142598000-142598400
chr1:149083959-149084234	AluJo_SINE_Alu	BIN_92	0.930378	chr1:149083600-149084000
chr1:153688298-153688423	AluJb_SINE_Alu	BIN_95	0.911692	chr1:153688400-153688800
chr1:180937551-180937862	AluSz6_SINE_Alu	BIN_120	0.900464	chr1:180937600-180938000
chr1:183224797-183225097	AluSz_SINE_Alu	BIN_124	0.82848	chr1:183224400-183224800
chr1:201308194-201308784	AluSc8_SINE_Alu,AluSq_SINE_Alu	BIN_137	0.862782	chr1:201308000-201308400
chr1:211430163-211430460	AluSc_SINE_Alu	BIN_146	0.862782	chr1:211430000-211430400
chr1:213181193-213181505	AluSp_SINE_Alu	BIN_153	0.958998	chr1:213180800-213181200
chr1:216299564-216299864	AluSx3_SINE_Alu	BIN_156	0.900464	chr1:216299600-216300000
chr1:220179171-220179311	FLAM_C_SINE_Alu	BIN_162	1.13408	chr1:220178800-220179200
chr1:225036514-225036807	AluJb_SINE_Alu	BIN_165	0.812156	chr1:225036400-225036800
chr1:230709133-230709431	AluSq2_SINE_Alu	BIN_170	0.801644	chr1:230709200-230709600
chr1:231915295-231915603	AluY_SINE_Alu	BIN_172	0.81311	chr1:231915200-231915600
chr1:234773649-234773956	AluSc_SINE_Alu	BIN_173	0.921589	chr1:234773600-234774000
chr1:235852003-235852284	AluSc8_SINE_Alu	BIN_175	0.95109	chr1:235852000-235852400
chr1:237281059-237281344	AluSx_SINE_Alu	BIN_177	0.797112	chr1:237280800-237281200
chr1:237762838-237763130	AluSx1_SINE_Alu	BIN_178	0.812156	chr1:237762800-237763200
chr1:242584198-242584501	AluSc_SINE_Alu	BIN_184	0.797112	chr1:242584400-242584800
chr2:9590131-9590583	FRAM_SINE_Alu,AluSx1_SINE_Alu	BIN_759	0.842916	chr2:9590400-9590800
chr2:17988088-17988415	AluJb_SINE_Alu	BIN_674	0.862782	chr2:17988400-17988800
chr2:25985252-25985561	AluSx1_SINE_Alu	BIN_728	0.847996	chr2:25985200-25985600
chr2:27367102-27367434	AluSx_SINE_Alu	BIN_730	0.921589	chr2:27367200-27367600
chr2:28926745-28927039	AluSz6_SINE_Alu	BIN_732	0.82848	chr2:28926400-28926800
chr2:41091005-41091267	AluSq_SINE_Alu	BIN_734	0.850585	chr2:41090800-41091200
chr2:67395987-67396308	AluSx1_SINE_Alu	BIN_743	0.812156	chr2:67396000-67396400
chr2:68397597-68397901	AluY_SINE_Alu	BIN_744	0.801644	chr2:68397600-68398000
chr2:70059070-70059367	AluSx1_SINE_Alu	BIN_746	0.812705	chr2:70059200-70059600
chr2:72947594-72947907	AluSz_SINE_Alu	BIN_747	0.82848	chr2:72947200-72947600
chr2:77778130-77778444	AluY_SINE_Alu	BIN_749	0.855774	chr2:77778000-77778400
chr2:85033461-85033766	AluY_SINE_Alu	BIN_752	0.847996	chr2:85033600-85034000
chr2:86471986-86472276	AluSx1_SINE_Alu	BIN_753	1.0473	chr2:86472000-86472400
chr2:86853874-86854174	AluSc8_SINE_Alu	BIN_755	0.930378	chr2:86853600-86854000
chr2:87113895-87114188	AluSz_SINE_Alu	BIN_756	0.897594	chr2:87114000-87114400
chr2:91780506-91780808	AluSx_SINE_Alu	BIN_757	0.879972	chr2:91780800-91781200
chr2:127980074-127980700	AluJo_SINE_Alu,AluY_SINE_Alu	BIN_635	0.900464	chr2:127980400-127980800
chr2:128023909-128024212	AluY_SINE_Alu	BIN_636	0.82848	chr2:128024000-128024400
chr2:142041187-142041380	AluSc_SINE_Alu	BIN_648	0.82848	chr2:142040800-142041200
chr2:143652404-143652511	AluJo_SINE_Alu	BIN_651	0.82848	chr2:143652400-143652800
chr2:144151021-144151323	AluSg_SINE_Alu	BIN_652	0.930378	chr2:144151200-144151600
chr2:145110607-145110827	AluSx_SINE_Alu	BIN_653	1.0048	chr2:145110400-145110800
chr2:152261082-152261380	AluSc5_SINE_Alu	BIN_655	0.812156	chr2:152260800-152261200
chr2:155458419-155459040	AluSx_SINE_Alu,AluY_SINE_Alu,AluSx_SINE_Alu	BIN_657	0.847996	chr2:155458400-155458800
chr2:157065146-157065433	AluSg_SINE_Alu	BIN_658	0.812156	chr2:157065200-157065600
chr2:159712661-159712942	AluSz_SINE_Alu	BIN_660	0.82848	chr2:159712800-159713200
chr2:170705971-170706104	AluSx1_SINE_Alu	BIN_666	0.900464	chr2:170706000-170706400
chr2:172826392-172826930	AluJr_SINE_Alu,AluSc8_SINE_Alu	BIN_667	1.1375	chr2:172826800-172827200
chr2:178159785-178160092	AluY_SINE_Alu	BIN_670	0.839219	chr2:178160000-178160400
chr2:184772969-184773262	AluY_SINE_Alu	BIN_676	0.797112	chr2:184773200-184773600
chr2:194131562-194131777	AluJr4_SINE_Alu	BIN_678	0.847996	chr2:194131200-194131600
chr2:203853346-203853636	AluJb_SINE_Alu	BIN_684	0.847996	chr2:203853600-203854000
chr2:204487297-204487581	AluYc_SINE_Alu	BIN_685	0.862782	chr2:204487200-204487600
chr2:205070829-205071125	AluSg7_SINE_Alu	BIN_686	0.875785	chr2:205070800-205071200
chr2:208743050-208743348	AluSp_SINE_Alu	BIN_688	0.982778	chr2:208743200-208743600
chr2:210212237-210212688	AluY_SINE_Alu,FLAM_A_SINE_Alu	BIN_691	0.999999	chr2:210212000-210212400
chr2:222045764-222046070	AluSq2_SINE_Alu	BIN_696	0.797112	chr2:222045600-222046000
chr2:223794217-223794517	AluSg_SINE_Alu	BIN_698	0.82848	chr2:223794400-223794800
chr2:224595434-224595736	AluSp_SINE_Alu	BIN_701	1.09311	chr2:224595200-224595600
chr2:229227810-229228108	AluSc_SINE_Alu	BIN_711	0.847996	chr2:229228000-229228400
chr2:229463470-229463785	AluY_SINE_Alu	BIN_712	0.862782	chr2:229463600-229464000
chr2:242025271-242025581	AluSz_SINE_Alu	BIN_720	0.999999	chr2:242025200-242025600
chr2:242112424-242112823	AluSz_SINE_Alu,AluJo_SINE_Alu	BIN_721	0.797112	chr2:242112400-242112800
chr3:10350482-10350919	FLAM_C_SINE_Alu,AluSx_SINE_Alu	BIN_764	0.862782	chr3:10350400-10350800
chr3:19926431-19926729	AluSq2_SINE_Alu	BIN_815	0.847996	chr3:19926400-19926800
chr3:22492082-22492384	AluJr4_SINE_Alu	BIN_817	0.812156	chr3:22492000-22492400
chr3:40591281-40591359	AluJb_SINE_Alu	BIN_827	0.875785	chr3:40591200-40591600
chr3:44130229-44130542	AluY_SINE_Alu	BIN_830	0.900464	chr3:44130400-44130800
chr3:44639620-44640182	AluSx1_SINE_Alu,AluSq2_SINE_Alu	BIN_831	1.09311	chr3:44639600-44640000
chr3:50130374-50131018	AluSq_SINE_Alu,AluJb_SINE_Alu,AluSc8_SINE_Alu,FLAM_C_SINE_Alu	BIN_833	0.812156	chr3:50130400-50130800
chr3:57417895-57418206	AluSz_SINE_Alu	BIN_834	0.855774	chr3:57417600-57418000
chr3:57627760-57628061	AluSx3_SINE_Alu	BIN_835	0.82848	chr3:57628000-57628400
chr3:57918264-57918567	AluSc_SINE_Alu	BIN_836	0.900464	chr3:57918400-57918800
chr3:70856629-70856940	AluJb_SINE_Alu	BIN_839	0.938236	chr3:70856400-70856800
chr3:71394258-71394541	AluSc_SINE_Alu	BIN_840	1.0492	chr3:71394400-71394800
chr3:77775127-77775430	AluJb_SINE_Alu	BIN_844	0.903523	chr3:77775200-77775600
chr3:120504158-120504753	AluSx_SINE_Alu,AluSq2_SINE_Alu,AluSx_SINE_Alu	BIN_771	0.82848	chr3:120504000-120504400
chr3:125261165-125261787	AluSx_SINE_Alu,AluY_SINE_Alu,AluSx_SINE_Alu	BIN_774	0.812156	chr3:125261200-125261600
chr3:134147005-134147309	AluSq2_SINE_Alu	BIN_777	0.900464	chr3:134147200-134147600
chr3:136259381-136259693	AluSx_SINE_Alu	BIN_778	0.877693	chr3:136259600-136260000
chr3:136500951-136501252	AluSx_SINE_Alu	BIN_779	0.862782	chr3:136500800-136501200
chr3:138599824-138600133	AluSz_SINE_Alu	BIN_781	0.900464	chr3:138599600-138600000
chr3:147279329-147279631	AluSx_SINE_Alu	BIN_788	0.82848	chr3:147279200-147279600
chr3:154780561-154780850	AluSg_SINE_Alu	BIN_792	0.862782	chr3:154780400-154780800
chr3:156514308-156514596	AluSx1_SINE_Alu	BIN_793	0.847996	chr3:156514000-156514400
chr3:156916488-156916804	AluJb_SINE_Alu	BIN_795	0.921589	chr3:156916400-156916800
chr3:168225890-168226199	AluSp_SINE_Alu	BIN_799	0.826659	chr3:168225600-168226000
chr3:169520478-169520779	AluSq2_SINE_Alu	BIN_801	0.812156	chr3:169520400-169520800
chr3:191405902-191406194	AluSx1_SINE_Alu	BIN_809	0.875785	chr3:191406000-191406400
chr3:195474454-195474749	AluSz_SINE_Alu	BIN_812	0.797112	chr3:195474400-195474800
chr3:196476693-196477222	AluJb_SINE_Alu,AluSq2_SINE_Alu,AluJb_SINE_Alu	BIN_813	0.862782	chr3:196477200-196477600
chr3:197310677-197310986	AluSg7_SINE_Alu	BIN_814	0.812156	chr3:197310400-197310800
chr4:2890162-2890444	AluSx1_SINE_Alu	BIN_907	0.847996	chr4:2890400-2890800
chr4:15680686-15680973	AluSc5_SINE_Alu	BIN_886	0.82848	chr4:15680800-15681200
chr4:25848250-25848563	AluSx1_SINE_Alu	BIN_905	0.88731	chr4:25848400-25848800
chr4:29617695-29617999	AluSx_SINE_Alu	BIN_908	0.812156	chr4:29617600-29618000
chr4:38973415-38973708	AluSp_SINE_Alu	BIN_911	0.877693	chr4:38973600-38974000
chr4:39020358-39020669	AluSx1_SINE_Alu	BIN_912	0.826659	chr4:39020400-39020800
chr4:48041081-48041372	AluSg7_SINE_Alu	BIN_916	0.911692	chr4:48041200-48041600
chr4:53585357-53585667	AluY_SINE_Alu	BIN_923	0.812705	chr4:53585200-53585600
chr4:57691022-57691314	AluJb_SINE_Alu	BIN_925	0.875785	chr4:57691200-57691600
chr4:71564738-71564844	FLAM_A_SINE_Alu	BIN_933	0.797112	chr4:71564800-71565200
chr4:71733183-71733508	AluSg_SINE_Alu,AluJb_SINE_Alu	BIN_934	0.911692	chr4:71733200-71733600
chr4:87139358-87139613	AluY_SINE_Alu	BIN_940	0.847996	chr4:87139200-87139600
chr4:101887738-101888050	AluSq2_SINE_Alu	BIN_857	0.797112	chr4:101887600-101888000
chr4:115996660-115996959	AluSg7_SINE_Alu	BIN_863	0.965983	chr4:115996800-115997200
chr4:121037571-121037870	AluSx1_SINE_Alu	BIN_866	0.812156	chr4:121037600-121038000
chr4:126582414-126582725	AluY_SINE_Alu	BIN_868	0.958998	chr4:126582400-126582800
chr4:137114887-137115184	AluSx1_SINE_Alu	BIN_873	0.900464	chr4:137114800-137115200
chr4:148891956-148892266	AluSx1_SINE_Alu	BIN_882	0.797112	chr4:148892000-148892400
chr4:159206393-159206693	AluSp_SINE_Alu	BIN_888	0.862782	chr4:159206400-159206800
chr4:160439214-160439516	AluSx_SINE_Alu	BIN_889	0.875785	chr4:160439200-160439600
chr4:174664391-174664547	AluJr4_SINE_Alu	BIN_896	0.812156	chr4:174664400-174664800
chr4:178308083-178308837	FLAM_A_SINE_Alu,AluY_SINE_Alu,AluSx3_SINE_Alu	BIN_898	0.803174	chr4:178308000-178308400
chr5:4255167-4255462	AluSq2_SINE_Alu	BIN_1003	0.862782	chr5:4255200-4255600
chr5:20480522-20480799	AluSz_SINE_Alu	BIN_986	0.875785	chr5:20480400-20480800
chr5:23485006-23485305	AluJb_SINE_Alu	BIN_990	0.911692	chr5:23485200-23485600
chr5:30176586-30176888	AluSg_SINE_Alu	BIN_997	0.999999	chr5:30176800-30177200
chr5:31600770-31601075	AluJo_SINE_Alu	BIN_998	0.812156	chr5:31600400-31600800
chr5:37132439-37132748	AluY_SINE_Alu	BIN_999	0.812156	chr5:37132400-37132800
chr5:40851153-40851443	AluSz_SINE_Alu	BIN_1001	0.812156	chr5:40851200-40851600
chr5:43178323-43178622	AluSp_SINE_Alu	BIN_1004	0.812156	chr5:43178400-43178800
chr5:56357113-56357418	AluSz_SINE_Alu	BIN_1005	0.911692	chr5:56357200-56357600
chr5:64790102-64790400	AluSx1_SINE_Alu	BIN_1007	0.958998	chr5:64790000-64790400
chr5:77576976-77577281	AluSq_SINE_Alu	BIN_1013	0.887111	chr5:77577200-77577600
chr5:93624958-93625258	AluSx1_SINE_Alu	BIN_1018	0.826659	chr5:93625200-93625600
chr5:96008131-96008436	AluSz6_SINE_Alu	BIN_1019	1.0492	chr5:96008400-96008800
chr5:99721012-99721196	FAM_SINE_Alu	BIN_1024	0.804406	chr5:99720800-99721200
chr5:103152586-103152894	AluSx3_SINE_Alu	BIN_948	0.915168	chr5:103152400-103152800
chr5:109885033-109885331	AluJo_SINE_Alu	BIN_952	0.801644	chr5:109885200-109885600
chr5:122962506-122962818	AluSz6_SINE_Alu	BIN_954	0.906829	chr5:122962800-122963200
chr5:125333342-125333641	AluY_SINE_Alu	BIN_956	0.847996	chr5:125333200-125333600
chr5:125997929-125998527	AluSc8_SINE_Alu,AluSx_SINE_Alu	BIN_958	0.797112	chr5:125997600-125998000
chr5:127123524-127123795	AluSz_SINE_Alu	BIN_959	0.797112	chr5:127123200-127123600
chr5:133959850-133960194	AluSx1_SINE_Alu,AluJo_SINE_Alu	BIN_963	0.812156	chr5:133960000-133960400
chr5:134129101-134129394	AluSz_SINE_Alu	BIN_964	0.95109	chr5:134129200-134129600
chr5:137360550-137360846	AluSx_SINE_Alu	BIN_967	0.847996	chr5:137360800-137361200
chr5:137421895-137422183	AluJb_SINE_Alu	BIN_968	0.900464	chr5:137422000-137422400
chr5:139921996-139922307	AluSx_SINE_Alu	BIN_971	0.847996	chr5:139922000-139922400
chr5:146501373-146501564	AluJb_SINE_Alu	BIN_972	0.900464	chr5:146501200-146501600
chr5:150832162-150832765	AluSx1_SINE_Alu,AluSq_SINE_Alu	BIN_974	0.862782	chr5:150832400-150832800
chr5:159647812-159648115	AluSx1_SINE_Alu	BIN_976	0.797112	chr5:159648000-159648400
chr5:167869559-167869871	AluSx1_SINE_Alu	BIN_978	0.82848	chr5:167869600-167870000
chr5:172948064-172948355	AluY_SINE_Alu	BIN_979	0.938236	chr5:172948000-172948400
chr5:180093182-180093490	AluSx1_SINE_Alu	BIN_981	0.82848	chr5:180093200-180093600
chr6:7855786-7856061	AluJb_SINE_Alu	BIN_1108	0.855774	chr6:7856000-7856400
chr6:14935571-14936034	AluSx_SINE_Alu,AluSx_SINE_Alu,AluSx_SINE_Alu	BIN_1046	0.812705	chr6:14936000-14936400
chr6:15899407-15900010	AluJb_SINE_Alu,AluSz6_SINE_Alu	BIN_1052	0.82848	chr6:15899600-15900000
chr6:18173038-18173337	AluSq2_SINE_Alu	BIN_1053	0.812156	chr6:18173200-18173600
chr6:21505990-21506118	FRAM_SINE_Alu	BIN_1055	0.812156	chr6:21505600-21506000
chr6:25532025-25532448	AluSx1_SINE_Alu,AluSp_SINE_Alu	BIN_1058	0.911692	chr6:25532400-25532800
chr6:25947111-25947416	AluJb_SINE_Alu	BIN_1059	0.812156	chr6:25946800-25947200
chr6:29641588-29641873	AluSq_SINE_Alu	BIN_1083	0.812156	chr6:29641600-29642000
chr6:35239169-35239471	AluSx3_SINE_Alu	BIN_1084	0.82848	chr6:35239200-35239600
chr6:36420313-36420612	AluSg_SINE_Alu	BIN_1086	0.842916	chr6:36420400-36420800
chr6:42684016-42684657	FLAM_A_SINE_Alu,AluJr_SINE_Alu,AluSq2_SINE_Alu	BIN_1092	0.82848	chr6:42684000-42684400
chr6:54668979-54669230	AluSz_SINE_Alu	BIN_1095	0.921589	chr6:54668800-54669200
chr6:55679645-55679953	AluSq2_SINE_Alu	BIN_1096	0.911692	chr6:55679600-55680000
chr6:57421527-57421837	AluSx3_SINE_Alu	BIN_1097	0.88731	chr6:57421200-57421600
chr6:75949535-75949830	AluSp_SINE_Alu	BIN_1106	0.812156	chr6:75949600-75950000
chr6:80755193-80755489	AluJr_SINE_Alu	BIN_1111	0.855774	chr6:80754800-80755200
chr6:81641009-81641295	AluJb_SINE_Alu	BIN_1112	0.842916	chr6:81641200-81641600
chr6:88359183-88359484	AluSp_SINE_Alu	BIN_1113	0.95109	chr6:88359200-88359600
chr6:89676427-89677021	AluSp_SINE_Alu,AluSz_SINE_Alu	BIN_1115	0.81311	chr6:89676800-89677200
chr6:90280767-90281040	AluY_SINE_Alu	BIN_1116	0.82848	chr6:90280800-90281200
chr6:96671203-96671554	AluJb_SINE_Alu,AluJb_SINE_Alu	BIN_1118	0.862782	chr6:96671200-96671600
chr6:100881457-100881605	AluJb_SINE_Alu	BIN_1025	0.812705	chr6:100881200-100881600
chr6:105221955-105222554	AluYa5_SINE_Alu,AluSc_SINE_Alu	BIN_1027	0.797112	chr6:105221600-105222000
chr6:132121536-132121840	AluJb_SINE_Alu	BIN_1032	0.967654	chr6:132121200-132121600
chr6:138950506-138950819	AluSq_SINE_Alu	BIN_1034	0.847996	chr6:138950400-138950800
chr6:144576491-144576654	AluJo_SINE_Alu	BIN_1041	0.812705	chr6:144576400-144576800
chr6:147694224-147694524	AluSz6_SINE_Alu	BIN_1045	0.81311	chr6:147694400-147694800
chr6:152152267-152152573	AluJr_SINE_Alu	BIN_1048	0.847996	chr6:152152000-152152400
chr6:152598013-152598324	AluSc8_SINE_Alu	BIN_1049	0.812156	chr6:152598000-152598400
chr7:1367776-1368080	AluY_SINE_Alu	BIN_1141	0.952529	chr7:1368000-1368400
chr7:4426988-4427279	AluSp_SINE_Alu	BIN_1160	0.842916	chr7:4426800-4427200
chr7:25169574-25170232	AluSz_SINE_Alu,AluSq2_SINE_Alu	BIN_1154	0.847996	chr7:25170000-25170400
chr7:43261148-43261442	AluY_SINE_Alu	BIN_1158	0.877693	chr7:43260800-43261200
chr7:43949043-43950127	AluSz_SINE_Alu,AluSp_SINE_Alu,AluJb_SINE_Alu,AluJb_SINE_Alu	BIN_1159	1.01006	chr7:43948800-43949200
chr7:51517384-51517691	AluSx1_SINE_Alu	BIN_1161	0.812156	chr7:51517600-51518000
chr7:65380821-65381127	AluSz_SINE_Alu	BIN_1168	0.850585	chr7:65380800-65381200
chr7:66446958-66447268	AluSx_SINE_Alu	BIN_1169	0.847996	chr7:66447200-66447600
chr7:68205406-68205709	AluSx_SINE_Alu	BIN_1170	0.797112	chr7:68205600-68206000
chr7:71337588-71337898	AluSz_SINE_Alu	BIN_1171	0.82848	chr7:71337600-71338000
chr7:71829814-71830332	AluSx_SINE_Alu,AluSx_SINE_Alu,AluSx_SINE_Alu	BIN_1172	0.95109	chr7:71830000-71830400
chr7:72253538-72254452	AluSx_SINE_Alu,AluJo_SINE_Alu,AluSx_SINE_Alu	BIN_1173	0.842916	chr7:72254000-72254400
chr7:75204183-75204791	AluSz6_SINE_Alu,AluSx_SINE_Alu	BIN_1174	0.797112	chr7:75204400-75204800
chr7:75948614-75948903	AluJo_SINE_Alu	BIN_1176	0.900464	chr7:75948800-75949200
chr7:77932412-77932720	AluSq2_SINE_Alu	BIN_1177	0.812156	chr7:77932400-77932800
chr7:100031995-100032298	AluSx_SINE_Alu	BIN_1120	0.847996	chr7:100032000-100032400
chr7:105412509-105412819	AluSx_SINE_Alu	BIN_1123	0.886971	chr7:105412400-105412800
chr7:116641997-116642445	AluSc_SINE_Alu,FLAM_A_SINE_Alu	BIN_1129	0.930378	chr7:116642400-116642800
chr7:119197045-119197305	AluYg6_SINE_Alu	BIN_1130	0.797112	chr7:119196800-119197200
chr7:128792618-128792929	AluSp_SINE_Alu	BIN_1138	0.82848	chr7:128792800-128793200
chr7:132147365-132147500	AluJr_SINE_Alu	BIN_1140	0.812156	chr7:132147200-132147600
chr7:142618448-142618750	AluSx3_SINE_Alu	BIN_1142	0.812156	chr7:142618400-142618800
chr7:144578148-144578457	AluSg_SINE_Alu	BIN_1143	0.797112	chr7:144578400-144578800
chr7:152175474-152176365	AluJb_SINE_Alu,AluSx_SINE_Alu,AluSp_SINE_Alu,AluSx_SINE_Alu,AluJb_SINE_Alu	BIN_1149	0.812156	chr7:152175600-152176000
chr7:156717558-156717869	AluY_SINE_Alu	BIN_1152	0.867301	chr7:156717600-156718000
chr8:11738648-11739249	AluJb_SINE_Alu,AluSq2_SINE_Alu,AluJb_SINE_Alu	BIN_1203	0.82848	chr8:11738800-11739200
chr8:19043410-19043722	AluY_SINE_Alu	BIN_1222	1.0048	chr8:19043600-19044000
chr8:30445107-30445410	AluSx1_SINE_Alu	BIN_1227	0.875785	chr8:30445200-30445600
chr8:30478160-30478460	AluSx_SINE_Alu	BIN_1228	0.972198	chr8:30478400-30478800
chr8:30823197-30823640	AluY_SINE_Alu,AluJb_SINE_Alu	BIN_1229	0.812156	chr8:30823200-30823600
chr8:32320108-32320419	AluSq2_SINE_Alu	BIN_1231	0.972119	chr8:32320000-32320400
chr8:33129540-33129843	AluSq_SINE_Alu	BIN_1233	0.911692	chr8:33129600-33130000
chr8:37763678-37763902	AluJb_SINE_Alu	BIN_1236	0.847996	chr8:37763600-37764000
chr8:42796056-42796683	AluSx1_SINE_Alu,AluY_SINE_Alu	BIN_1239	0.930378	chr8:42796400-42796800
chr8:70938318-70938622	AluSz6_SINE_Alu	BIN_1254	0.911692	chr8:70938400-70938800
chr8:73846345-73846649	AluSx3_SINE_Alu	BIN_1256	0.801644	chr8:73846400-73846800
chr8:103434312-103434548	AluJb_SINE_Alu	BIN_1193	0.812705	chr8:103434000-103434400
chr8:125457818-125458112	AluSg7_SINE_Alu	BIN_1209	0.812156	chr8:125457600-125458000
chr8:125834383-125834685	AluSq2_SINE_Alu	BIN_1210	0.921589	chr8:125834400-125834800
chr9:34159907-34160208	AluSz_SINE_Alu	BIN_1289	0.862782	chr9:34160000-34160400
chr9:38326785-38326918	FLAM_C_SINE_Alu	BIN_1292	0.812156	chr9:38326400-38326800
chr9:74515783-74516090	AluY_SINE_Alu	BIN_1296	0.958998	chr9:74516000-74516400
chr9:77201131-77201437	AluJb_SINE_Alu	BIN_1297	0.847996	chr9:77201200-77201600
chr9:79413974-79414276	AluSq_SINE_Alu	BIN_1298	0.812156	chr9:79414000-79414400
chr9:80067766-80068082	AluJr4_SINE_Alu	BIN_1299	0.81311	chr9:80067600-80068000
chr9:100338911-100339220	AluY_SINE_Alu	BIN_1269	0.826659	chr9:100338800-100339200
chr9:104841130-104841388	AluSg_SINE_Alu	BIN_1271	0.82848	chr9:104841200-104841600
chr9:105010877-105011518	AluY_SINE_Alu,AluSc_SINE_Alu	BIN_1272	0.846588	chr9:105011200-105011600
chr9:105774229-105774542	AluSz_SINE_Alu	BIN_1273	0.82848	chr9:105774000-105774400
chr9:123413932-123414228	AluSx1_SINE_Alu	BIN_1278	0.930378	chr9:123414000-123414400
chr9:128242969-128243280	AluY_SINE_Alu	BIN_1279	0.875785	chr9:128242800-128243200
chr9:128455409-128455706	AluSq2_SINE_Alu	BIN_1280	1.0588	chr9:128455600-128456000
chr9:131634124-131635373	AluSc_SINE_Alu,AluY_SINE_Alu,AluSx_SINE_Alu,AluSz_SINE_Alu	BIN_1281	0.862782	chr9:131634400-131634800
chr9:132970567-132970852	AluSx1_SINE_Alu	BIN_1282	0.812156	chr9:132970400-132970800
chr10:8249402-8249707	AluSc_SINE_Alu	BIN_44	0.847996	chr10:8249200-8249600
chr10:14409946-14410263	AluJb_SINE_Alu	BIN_13	0.797112	chr10:14409600-14410000
chr10:15567359-15567667	AluSx_SINE_Alu	BIN_15	0.81311	chr10:15567600-15568000
chr10:20880042-20880338	AluSz_SINE_Alu	BIN_18	0.812156	chr10:20880000-20880400
chr10:26474258-26474568	AluSz_SINE_Alu	BIN_20	0.915168	chr10:26474400-26474800
chr10:30623307-30623608	AluSx_SINE_Alu	BIN_24	0.82848	chr10:30623200-30623600
chr10:38450049-38450359	AluSx1_SINE_Alu	BIN_26	0.862782	chr10:38450000-38450400
chr10:63921726-63922026	AluSx_SINE_Alu	BIN_36	0.900464	chr10:63921600-63922000
chr10:67874356-67874665	AluSc_SINE_Alu	BIN_40	0.847679	chr10:67874000-67874400
chr10:70424155-70424828	AluSz_SINE_Alu,AluJo_SINE_Alu,AluJr_SINE_Alu	BIN_41	0.875785	chr10:70424800-70425200
chr10:76425217-76425492	AluJr4_SINE_Alu	BIN_42	0.847996	chr10:76425200-76425600
chr10:88237277-88237841	AluSx1_SINE_Alu,AluSq2_SINE_Alu	BIN_45	0.900464	chr10:88237200-88237600
chr10:93880462-93881064	AluSx_SINE_Alu,AluSc8_SINE_Alu	BIN_48	0.900464	chr10:93880400-93880800
chr10:97586928-97587541	AluSx3_SINE_Alu,AluSc_SINE_Alu	BIN_49	0.812156	chr10:97586800-97587200
chr10:102160007-102160652	AluSx1_SINE_Alu,AluSz_SINE_Alu	BIN_1	0.911692	chr10:102160000-102160400
chr10:105864370-105864425	AluYf4_SINE_Alu	BIN_2	0.847996	chr10:105864000-105864400
chr10:112739916-112740179	AluY_SINE_Alu	BIN_3	0.812156	chr10:112739600-112740000
chr10:126303174-126303488	AluSq_SINE_Alu	BIN_7	0.862782	chr10:126303200-126303600
chr10:127172151-127172448	AluSg_SINE_Alu	BIN_9	0.82848	chr10:127172000-127172400
chr10:129729043-129729354	AluSc_SINE_Alu	BIN_10	0.812156	chr10:129728800-129729200
chr11:26408687-26408818	AluSx3_SINE_Alu	BIN_79	0.836409	chr11:26408400-26408800
chr11:41803857-41804162	AluSg4_SINE_Alu	BIN_84	0.945304	chr11:41804000-41804400
chr11:45332719-45333025	AluJb_SINE_Alu	BIN_89	0.812705	chr11:45332800-45333200
chr11:46328324-46328940	AluJb_SINE_Alu,AluSz_SINE_Alu,AluJb_SINE_Alu	BIN_90	0.812156	chr11:46328800-46329200
chr11:46455383-46455695	AluSp_SINE_Alu	BIN_91	0.847996	chr11:46455200-46455600
chr11:57315861-57316159	AluSz_SINE_Alu	BIN_98	0.847996	chr11:57315600-57316000
chr11:59519452-59519996	AluJb_SINE_Alu,AluSc5_SINE_Alu,AluJb_SINE_Alu	BIN_102	0.95109	chr11:59519600-59520000
chr11:60903633-60903945	AluSx_SINE_Alu	BIN_103	0.911692	chr11:60903600-60904000
chr11:61702995-61703286	AluSx1_SINE_Alu	BIN_104	0.862782	chr11:61703200-61703600
chr11:63382205-63382490	AluSc8_SINE_Alu	BIN_108	0.897594	chr11:63382400-63382800
chr11:64097501-64097817	AluSp_SINE_Alu	BIN_109	0.900464	chr11:64097600-64098000
chr11:77561999-77562298	AluSg7_SINE_Alu	BIN_119	0.862782	chr11:77561600-77562000
chr11:82778751-82779359	AluSx_SINE_Alu,AluSz_SINE_Alu,AluSx_SINE_Alu	BIN_123	0.847996	chr11:82779200-82779600
chr11:94137279-94137580	AluY_SINE_Alu	BIN_130	0.847996	chr11:94137200-94137600
chr11:98112779-98113069	AluY_SINE_Alu	BIN_134	0.862782	chr11:98112400-98112800
chr11:103061757-103062067	AluSx4_SINE_Alu	BIN_55	1.09226	chr11:103062000-103062400
chr11:113770710-113770994	AluSx_SINE_Alu	BIN_61	0.812156	chr11:113770400-113770800
chr11:128929391-128929692	AluSg_SINE_Alu	BIN_65	0.88731	chr11:128929200-128929600
chr11:132611639-132611954	AluSp_SINE_Alu	BIN_68	0.875785	chr11:132611600-132612000
chr12:538629-538920	AluJb_SINE_Alu	BIN_194	0.847996	chr12:538800-539200
chr12:1696121-1696430	AluSp_SINE_Alu	BIN_158	0.862782	chr12:1696000-1696400
chr12:3087542-3087868	AluSx_SINE_Alu	BIN_171	0.797112	chr12:3087600-3088000
chr12:6109693-6110004	AluY_SINE_Alu	BIN_198	0.812156	chr12:6110000-6110400
chr12:8166213-8166669	AluSq10_SINE_Alu,AluY_SINE_Alu,AluY_SINE_Alu	BIN_216	0.812156	chr12:8166400-8166800
chr12:29283439-29283717	AluY_SINE_Alu	BIN_169	0.812156	chr12:29283200-29283600
chr12:37957808-37958096	AluSx3_SINE_Alu	BIN_179	0.911692	chr12:37957600-37958000
chr12:49051417-49052016	AluSq2_SINE_Alu,AluSz_SINE_Alu	BIN_190	0.847996	chr12:49051600-49052000
chr12:49058062-49058873	AluY_SINE_Alu,AluSg7_SINE_Alu,AluJr_SINE_Alu	BIN_191	0.797112	chr12:49058400-49058800
chr12:53948823-53949122	AluSq2_SINE_Alu	BIN_195	0.82848	chr12:53948800-53949200
chr12:64563366-64563612	AluSx_SINE_Alu	BIN_200	0.847996	chr12:64563600-64564000
chr12:71325713-71326011	AluSg_SINE_Alu	BIN_202	0.842916	chr12:71325600-71326000
chr12:76434408-76434642	AluSx4_SINE_Alu	BIN_204	0.82848	chr12:76434400-76434800
chr12:76510125-76510439	AluSq_SINE_Alu	BIN_205	0.812705	chr12:76510400-76510800
chr12:76622008-76622405	AluJo_SINE_Alu,AluJb_SINE_Alu	BIN_206	1.1375	chr12:76622400-76622800
chr12:77291532-77291824	AluJo_SINE_Alu	BIN_208	0.82848	chr12:77291600-77292000
chr12:86297236-86297520	AluJr4_SINE_Alu	BIN_223	1.05371	chr12:86297200-86297600
chr12:90113557-90113836	AluSx_SINE_Alu	BIN_225	0.812705	chr12:90113600-90114000
chr12:95414981-95415270	FLAM_C_SINE_Alu,AluJb_SINE_Alu	BIN_226	0.812156	chr12:95414800-95415200
chr12:96304357-96304676	AluJr4_SINE_Alu	BIN_228	0.900464	chr12:96304000-96304400
chr12:98777481-98777767	AluSg_SINE_Alu	BIN_231	0.812156	chr12:98777600-98778000
chr12:102208192-102208487	AluSx1_SINE_Alu	BIN_141	0.812156	chr12:102208400-102208800
chr12:104222463-104222776	AluSz_SINE_Alu	BIN_142	0.797112	chr12:104222400-104222800
chr12:109989628-109990231	AluSz_SINE_Alu,AluSx_SINE_Alu	BIN_144	0.847996	chr12:109990000-109990400
chr12:113553892-113554192	AluSz_SINE_Alu	BIN_145	1.0492	chr12:113553600-113554000
chr12:120740510-120740825	AluSz_SINE_Alu	BIN_148	0.862782	chr12:120740400-120740800
chr13:21485899-21487128	AluSx1_SINE_Alu,AluJb_SINE_Alu,AluY_SINE_Alu,AluSx1_SINE_Alu	BIN_241	0.797112	chr13:21485600-21486000
chr13:29697575-29697846	AluSz_SINE_Alu	BIN_244	0.900464	chr13:29697600-29698000
chr13:30133857-30134149	AluY_SINE_Alu	BIN_245	0.82848	chr13:30134000-30134400
chr13:33114130-33114435	AluSq2_SINE_Alu	BIN_247	0.82848	chr13:33114000-33114400
chr13:34812612-34812846	AluSc_SINE_Alu	BIN_249	0.847996	chr13:34812400-34812800
chr13:39075411-39075706	AluSz_SINE_Alu	BIN_257	0.900464	chr13:39075200-39075600
chr13:41206127-41206425	AluSc8_SINE_Alu	BIN_258	0.999999	chr13:41206000-41206400
chr13:44430484-44430791	AluY_SINE_Alu	BIN_260	0.95109	chr13:44430400-44430800
chr13:45698273-45699113	AluSc8_SINE_Alu,AluSp_SINE_Alu,AluSx_SINE_Alu,AluSx3_SINE_Alu,AluSx_SINE_Alu	BIN_261	0.82848	chr13:45698400-45698800
chr13:46670630-46670930	AluSx1_SINE_Alu	BIN_263	0.847996	chr13:46670400-46670800
chr13:57430370-57430670	AluY_SINE_Alu	BIN_267	0.82848	chr13:57430400-57430800
chr13:63638596-63638907	AluSc8_SINE_Alu	BIN_270	0.812705	chr13:63638800-63639200
chr13:71850200-71850487	AluSp_SINE_Alu	BIN_272	0.862782	chr13:71850000-71850400
chr13:80686169-80686454	AluSx_SINE_Alu	BIN_276	0.958998	chr13:80686400-80686800
chr13:99920584-99920892	AluJb_SINE_Alu	BIN_289	0.911692	chr13:99920800-99921200
chr13:100659441-100659756	AluSx1_SINE_Alu	BIN_234	0.82848	chr13:100659600-100660000
chr13:107528233-107528484	AluSz_SINE_Alu	BIN_237	0.847996	chr13:107528400-107528800
chr13:113275243-113275612	FLAM_C_SINE_Alu,AluSx_SINE_Alu	BIN_239	0.847996	chr13:113275200-113275600
chr14:21744108-21746120	AluSx_SINE_Alu,AluY_SINE_Alu,AluSx_SINE_Alu,AluSc5_SINE_Alu,AluSz6_SINE_Alu,AluSx_SINE_Alu,AluSx1_SINE_Alu,AluSq2_SINE_Alu	BIN_294	0.945304	chr14:21744000-21744400
chr14:23296881-23297172	AluSz_SINE_Alu	BIN_295	0.812156	chr14:23296800-23297200
chr14:33750554-33750845	AluSz_SINE_Alu	BIN_307	0.812156	chr14:33750400-33750800
chr14:43929464-43929740	AluSg7_SINE_Alu	BIN_312	0.862782	chr14:43929200-43929600
chr14:44251895-44252203	AluSp_SINE_Alu	BIN_313	0.875785	chr14:44252000-44252400
chr14:65793177-65793314	AluJr4_SINE_Alu	BIN_320	0.812156	chr14:65793200-65793600
chr14:65974785-65975087	AluSx3_SINE_Alu	BIN_321	0.855774	chr14:65974800-65975200
chr14:67496053-67496353	AluSq2_SINE_Alu	BIN_322	0.906829	chr14:67496000-67496400
chr14:69691415-69691707	AluSc_SINE_Alu	BIN_324	0.797112	chr14:69691600-69692000
chr14:74564942-74565549	AluSz_SINE_Alu,AluSq_SINE_Alu	BIN_325	0.812156	chr14:74565200-74565600
chr14:77782657-77782933	AluJr_SINE_Alu	BIN_328	1.05087	chr14:77782800-77783200
chr14:90967794-90968113	AluSx1_SINE_Alu	BIN_331	0.826659	chr14:90968000-90968400
chr14:96774620-96774938	AluSx1_SINE_Alu	BIN_335	0.847996	chr14:96774400-96774800
chr14:99479849-99480162	AluY_SINE_Alu	BIN_337	0.900464	chr14:99480000-99480400
chr14:103906841-103907301	AluSc_SINE_Alu,AluJr_SINE_Alu	BIN_290	0.797112	chr14:103907200-103907600
chr14:104386172-104387106	AluSc_SINE_Alu,AluSc8_SINE_Alu,AluSc_SINE_Alu	BIN_291	0.797112	chr14:104386400-104386800
chr15:24596136-24596444	AluY_SINE_Alu	BIN_341	0.951694	chr15:24596400-24596800
chr15:42682976-42683290	AluSz_SINE_Alu	BIN_344	0.877693	chr15:42682800-42683200
chr15:42690500-42690787	AluSz_SINE_Alu	BIN_345	0.847996	chr15:42690400-42690800
chr15:43091627-43091933	AluSz_SINE_Alu	BIN_346	0.862782	chr15:43091600-43092000
chr15:45853857-45854021	FAM_SINE_Alu	BIN_349	0.812705	chr15:45853600-45854000
chr15:51895781-51896088	AluY_SINE_Alu	BIN_350	0.88731	chr15:51896000-51896400
chr15:52126745-52127032	AluJb_SINE_Alu	BIN_351	0.812156	chr15:52126400-52126800
chr15:55985033-55985670	AluSz_SINE_Alu,AluSp_SINE_Alu	BIN_353	0.812156	chr15:55984800-55985200
chr15:65482365-65482675	AluY_SINE_Alu	BIN_358	0.812156	chr15:65482000-65482400
chr15:66987762-66988079	AluSq2_SINE_Alu	BIN_359	0.862782	chr15:66987600-66988000
chr15:71995324-71995613	AluSx_SINE_Alu	BIN_361	0.847996	chr15:71995200-71995600
chr15:72169806-72170093	AluSx1_SINE_Alu	BIN_362	0.812156	chr15:72170000-72170400
chr15:77232887-77233202	AluSz_SINE_Alu	BIN_364	0.945415	chr15:77232800-77233200
chr15:87985572-87985877	AluY_SINE_Alu	BIN_369	0.797112	chr15:87985600-87986000
chr16:1745947-1746547	AluSx1_SINE_Alu,AluSc8_SINE_Alu	BIN_376	0.847996	chr16:1746000-1746400
chr16:4345951-4347009	AluSc8_SINE_Alu,AluSx_SINE_Alu,AluY_SINE_Alu,AluSq2_SINE_Alu	BIN_411	0.900464	chr16:4346000-4346400
chr16:4503058-4503219	FRAM_SINE_Alu	BIN_412	0.842916	chr16:4503200-4503600
chr16:16728746-16729313	AluY_SINE_Alu,AluSx_SINE_Alu	BIN_374	0.862782	chr16:16728800-16729200
chr16:20398933-20399181	AluSx_SINE_Alu	BIN_378	0.847996	chr16:20398800-20399200
chr16:21598624-21598926	AluSp_SINE_Alu	BIN_379	0.847996	chr16:21598800-21599200
chr16:21609389-21609693	AluSc_SINE_Alu	BIN_380	0.82848	chr16:21609600-21610000
chr16:24592294-24592587	AluSz_SINE_Alu	BIN_381	0.826659	chr16:24592400-24592800
chr16:24899795-24900417	AluSx_SINE_Alu,AluSx_SINE_Alu	BIN_382	1.0492	chr16:24899600-24900000
chr16:26986996-26987328	AluSc_SINE_Alu	BIN_384	0.826659	chr16:26986800-26987200
chr16:27627764-27628246	AluSx1_SINE_Alu,FLAM_C_SINE_Alu	BIN_385	0.803174	chr16:27628000-27628400
chr16:29843280-29843400	AluY_SINE_Alu	BIN_387	0.867301	chr16:29843200-29843600
chr16:30975031-30975325	AluY_SINE_Alu	BIN_390	0.969187	chr16:30975200-30975600
chr16:33865626-33865694	AluYh9_SINE_Alu	BIN_407	0.806984	chr16:33865600-33866000
chr16:33900375-33900422	AluYf4_SINE_Alu	BIN_408	0.826312	chr16:33900400-33900800
chr16:64551548-64551848	AluSz6_SINE_Alu	BIN_425	0.81311	chr16:64551600-64552000
chr16:68251061-68251393	AluJb_SINE_Alu	BIN_427	0.799691	chr16:68251200-68251600
chr16:71944227-71944538	AluY_SINE_Alu	BIN_428	0.875785	chr16:71944400-71944800
chr16:72518628-72518924	AluSx1_SINE_Alu	BIN_429	0.797112	chr16:72518400-72518800
chr16:74543061-74543179	AluSq2_SINE_Alu	BIN_430	0.842916	chr16:74542800-74543200
chr16:75341102-75341415	AluSq_SINE_Alu	BIN_431	0.900464	chr16:75341200-75341600
chr16:76651716-76652026	AluY_SINE_Alu	BIN_432	0.812156	chr16:76651600-76652000
chr17:3484029-3484327	AluSx1_SINE_Alu	BIN_452	0.797112	chr17:3484000-3484400
chr17:8641782-8642081	AluSg_SINE_Alu	BIN_486	0.88731	chr17:8641600-8642000
chr17:9748380-9748580	AluJb_SINE_Alu	BIN_487	0.862782	chr17:9748400-9748800
chr17:10644265-10644501	AluSx1_SINE_Alu	BIN_440	0.847996	chr17:10644000-10644400
chr17:16312999-16313432	AluY_SINE_Alu,AluSx3_SINE_Alu	BIN_444	0.812156	chr17:16312800-16313200
chr17:21040271-21041321	AluSx1_SINE_Alu,AluY_SINE_Alu,AluSp_SINE_Alu,AluY_SINE_Alu,AluY_SINE_Alu	BIN_445	0.82848	chr17:21041200-21041600
chr17:25696930-25697362	AluSp_SINE_Alu,AluJr_SINE_Alu	BIN_447	0.812156	chr17:25696800-25697200
chr17:29409475-29409786	AluSx1_SINE_Alu	BIN_451	0.82848	chr17:29409600-29410000
chr17:35682865-35683797	AluSx4_SINE_Alu,AluSp_SINE_Alu,AluSx1_SINE_Alu	BIN_453	0.911692	chr17:35683200-35683600
chr17:36377872-36378094	AluSc5_SINE_Alu	BIN_454	0.847996	chr17:36378000-36378400
chr17:46248455-46248766	AluSp_SINE_Alu	BIN_459	0.958998	chr17:46248400-46248800
chr17:46738224-46738645	AluSc8_SINE_Alu,AluSx_SINE_Alu	BIN_461	0.958998	chr17:46738400-46738800
chr17:56512991-56513280	AluY_SINE_Alu	BIN_467	0.81311	chr17:56513200-56513600
chr17:57527205-57527806	AluJb_SINE_Alu,AluSx_SINE_Alu,AluJb_SINE_Alu	BIN_468	0.812156	chr17:57527200-57527600
chr17:59339743-59340352	AluSx_SINE_Alu,AluSp_SINE_Alu	BIN_469	0.847996	chr17:59340000-59340400
chr17:61738424-61738706	AluSz_SINE_Alu	BIN_473	0.847996	chr17:61738400-61738800
chr17:62226857-62227307	AluSx_SINE_Alu,AluY_SINE_Alu	BIN_474	0.900464	chr17:62227200-62227600
chr17:73010274-73010841	AluY_SINE_Alu,AluSz6_SINE_Alu	BIN_478	0.797112	chr17:73010000-73010400
chr17:75289903-75290522	AluJb_SINE_Alu,AluSz_SINE_Alu	BIN_479	0.900464	chr17:75290000-75290400
chr17:75998691-75998816	AluJr_SINE_Alu	BIN_481	0.965983	chr17:75998800-75999200
chr17:77973329-77973642	AluSx1_SINE_Alu	BIN_483	0.797112	chr17:77973200-77973600
chr18:70354-72207	AluSz_SINE_Alu,AluSq2_SINE_Alu,AluJb_SINE_Alu,AluSp_SINE_Alu,AluSz_SINE_Alu,AluSg7_SINE_Alu	BIN_531	0.797112	chr18:72000-72400
chr18:2513932-2514062	FLAM_A_SINE_Alu	BIN_497	0.911692	chr18:2514000-2514400
chr18:6560508-6560809	AluSq_SINE_Alu	BIN_524	0.88731	chr18:6560400-6560800
chr18:11794788-11795409	AluJb_SINE_Alu,AluSx1_SINE_Alu,AluJb_SINE_Alu	BIN_492	0.812156	chr18:11795200-11795600
chr18:20859846-20859968	AluJo_SINE_Alu	BIN_493	0.921589	chr18:20859600-20860000
chr18:21051914-21052211	AluSx_SINE_Alu	BIN_494	1.00905	chr18:21051600-21052000
chr18:40787309-40787611	AluSp_SINE_Alu	BIN_506	0.82848	chr18:40787200-40787600
chr18:41525838-41526147	AluSx3_SINE_Alu	BIN_508	0.842916	chr18:41526000-41526400
chr18:47356935-47357228	AluSx_SINE_Alu	BIN_512	0.797112	chr18:47357200-47357600
chr18:48592439-48592732	AluSz_SINE_Alu	BIN_513	0.812156	chr18:48592400-48592800
chr18:57510990-57511293	AluSg4_SINE_Alu	BIN_516	0.82848	chr18:57510800-57511200
chr18:58949372-58949685	AluSx1_SINE_Alu	BIN_518	1.01624	chr18:58949200-58949600
chr18:61721277-61721589	AluSz6_SINE_Alu	BIN_520	0.855774	chr18:61721200-61721600
chr18:64691970-64692120	AluSq4_SINE_Alu	BIN_523	0.965983	chr18:64692000-64692400
chr18:70367349-70367615	AluSx_SINE_Alu	BIN_530	0.903523	chr18:70367600-70368000
chr19:2525813-2526402	AluSx_SINE_Alu,AluY_SINE_Alu,AluSx_SINE_Alu	BIN_541	0.99522	chr19:2526400-2526800
chr19:3087870-3088437	AluJo_SINE_Alu,AluSp_SINE_Alu	BIN_542	0.812156	chr19:3088400-3088800
chr19:5575229-5575525	AluSp_SINE_Alu	BIN_554	0.812156	chr19:5575200-5575600
chr19:8429661-8429743	AluJo_SINE_Alu	BIN_560	0.862782	chr19:8429600-8430000
chr19:15647827-15648132	AluSx1_SINE_Alu	BIN_536	0.797112	chr19:15647600-15648000
chr19:19377895-19378207	AluSp_SINE_Alu	BIN_539	0.875785	chr19:19378000-19378400
chr19:34922144-34922320	AluJo_SINE_Alu	BIN_544	0.801644	chr19:34922000-34922400
chr19:36722704-36723122	FLAM_C_SINE_Alu,AluSx_SINE_Alu	BIN_549	0.797112	chr19:36722800-36723200
chr19:36920874-36921180	AluSx3_SINE_Alu	BIN_550	0.812156	chr19:36920800-36921200
chr20:414645-414945	AluSx1_SINE_Alu	BIN_588	0.862782	chr20:414800-415200
chr20:2530546-2531020	AluSx_SINE_Alu,AluJb_SINE_Alu	BIN_573	0.862782	chr20:2530400-2530800
chr20:3251458-3251758	AluSx1_SINE_Alu	BIN_580	0.82848	chr20:3251200-3251600
chr20:15477943-15478234	AluSg7_SINE_Alu	BIN_564	0.812156	chr20:15477600-15478000
chr20:19442164-19442476	AluSz_SINE_Alu	BIN_568	0.951694	chr20:19442000-19442400
chr20:21163153-21163459	AluSx_SINE_Alu	BIN_570	0.875785	chr20:21163200-21163600
chr20:21942729-21943036	AluYf4_SINE_Alu	BIN_571	0.987318	chr20:21942800-21943200
chr20:25079377-25079684	AluY_SINE_Alu	BIN_572	0.847996	chr20:25079200-25079600
chr20:30227361-30227658	AluSg4_SINE_Alu	BIN_576	0.799691	chr20:30227200-30227600
chr20:32393664-32393970	AluY_SINE_Alu	BIN_579	0.875785	chr20:32393600-32394000
chr20:35181944-35182376	AluSx_SINE_Alu,AluJr_SINE_Alu	BIN_583	0.797112	chr20:35182000-35182400
chr20:42526325-42526620	AluSc5_SINE_Alu	BIN_589	0.812156	chr20:42526400-42526800
chr20:42584916-42585221	AluSx_SINE_Alu	BIN_590	0.958998	chr20:42584800-42585200
chr20:42978871-42979170	AluJb_SINE_Alu	BIN_592	0.812156	chr20:42978800-42979200
chr20:43545843-43546145	AluJb_SINE_Alu	BIN_593	0.855774	chr20:43545600-43546000
chr20:46227077-46227379	AluSz_SINE_Alu	BIN_594	0.855774	chr20:46227200-46227600
chr20:47794435-47794729	AluJr_SINE_Alu	BIN_595	0.900464	chr20:47794400-47794800
chr20:48620330-48620956	AluSx_SINE_Alu,AluJo_SINE_Alu	BIN_596	0.862782	chr20:48620400-48620800
chr20:48661893-48662201	AluSg_SINE_Alu	BIN_597	0.862782	chr20:48662000-48662400
chr20:49866688-49866942	AluSg_SINE_Alu	BIN_599	1.05087	chr20:49866400-49866800
chr20:50529607-50529905	AluSz_SINE_Alu	BIN_600	0.897594	chr20:50529600-50530000
chr20:56875153-56875440	AluSc_SINE_Alu	BIN_602	0.82848	chr20:56875200-56875600
chr21:9862042-9862316	AluSq2_SINE_Alu	BIN_681	0.812156	chr21:9862000-9862400
chr21:11065963-11066273	AluSx1_SINE_Alu	BIN_615	0.797112	chr21:11066000-11066400
chr21:18102367-18102676	AluY_SINE_Alu	BIN_620	0.951694	chr21:18102000-18102400
chr21:24477598-24477657	FLAM_A_SINE_Alu	BIN_1377	0.82848	chr21:24477200-24477600
chr21:26170274-26170573	AluSp_SINE_Alu	BIN_632	0.797112	chr21:26170000-26170400
chr21:35354580-35354878	AluSx1_SINE_Alu	BIN_642	0.875785	chr21:35354800-35355200
chr21:38856631-38856932	AluSq2_SINE_Alu	BIN_643	1.0473	chr21:38856800-38857200
chr21:40530355-40530957	AluSx_SINE_Alu,AluSp_SINE_Alu,AluSx_SINE_Alu	BIN_645	0.958998	chr21:40530000-40530400
chr21:42128939-42129250	AluY_SINE_Alu	BIN_649	1.0048	chr21:42128800-42129200
chr22:23785511-23785821	AluSz_SINE_Alu	BIN_697	0.797112	chr22:23785600-23786000
chr22:27966259-27966571	AluY_SINE_Alu	BIN_709	1.0048	chr22:27966000-27966400
chr22:38536232-38536526	AluSx1_SINE_Alu	BIN_718	0.911692	chr22:38536400-38536800
chr22:39316768-39317055	AluSq2_SINE_Alu	BIN_719	0.862782	chr22:39316800-39317200
chr22:46566147-46566442	AluJr_SINE_Alu	BIN_723	0.842916	chr22:46566000-46566400
chr22:50652080-50652376	AluY_SINE_Alu	BIN_727	0.82848	chr22:50652000-50652400
chrX:4515191-4515489	AluSq2_SINE_Alu	BIN_1350	0.812156	chrX:4515200-4515600
chrX:6566671-6566925	AluJb_SINE_Alu	BIN_1357	0.812156	chrX:6566800-6567200
chrX:15818298-15818609	AluSc_SINE_Alu	BIN_1337	0.797112	chrX:15818000-15818400
chrX:24347253-24347566	AluSq_SINE_Alu	BIN_1341	0.847996	chrX:24347200-24347600
chrX:30083048-30083313	AluY_SINE_Alu	BIN_1343	0.847996	chrX:30082800-30083200
chrX:33126388-33127006	AluSx_SINE_Alu,AluSq2_SINE_Alu	BIN_1346	0.862782	chrX:33126800-33127200
chrX:39602131-39602742	AluSx_SINE_Alu,AluSp_SINE_Alu,AluSx_SINE_Alu	BIN_1348	0.797112	chrX:39602400-39602800
chrX:40645257-40645567	AluSq_SINE_Alu	BIN_1349	0.95109	chrX:40645200-40645600
chrX:53533134-53533450	AluSx_SINE_Alu	BIN_1354	0.875785	chrX:53533200-53533600
chrX:70701400-70701706	AluSc8_SINE_Alu	BIN_1359	0.812156	chrX:70701200-70701600
chrX:71647948-71648241	AluSg_SINE_Alu	BIN_1360	0.847996	chrX:71647600-71648000
chrX:81392527-81392822	AluSc_SINE_Alu	BIN_1364	0.847996	chrX:81392400-81392800
chrX:82866736-82867043	AluSz_SINE_Alu	BIN_1365	0.812156	chrX:82866400-82866800
chrX:98042577-98042853	AluY_SINE_Alu	BIN_1370	0.82848	chrX:98042800-98043200
chrX:108323214-108323304	AluJo_SINE_Alu	BIN_1310	0.911692	chrX:108323200-108323600
chrX:112187975-112188285	AluY_SINE_Alu	BIN_1312	0.999999	chrX:112188000-112188400
chrX:118721600-118721902	AluSq2_SINE_Alu	BIN_1317	0.900464	chrX:118721600-118722000
chrX:147021133-147021708	AluJb_SINE_Alu,AluYa5_SINE_Alu	BIN_1333	0.903523	chrX:147021600-147022000
chrY:13276153-13276434	AluSz_SINE_Alu	BIN_1372	0.797112	chrY:13276400-13276800
chr1:568843-568913	Mitochondrial_tRNA-derived_pseudogene	BIN_360	0.967654	chr1:569200-569600
chr1:50543592-50543763	MIR_SINE_MIR	BIN_338	0.915168	chr1:50543600-50544000
chr1:162737756-162737910	MIRc_SINE_MIR	BIN_105	0.812156	chr1:162737600-162738000
chr2:30680650-30680836	MIRb_SINE_MIR	BIN_1378	0.847996	chr2:30680800-30681200
chr2:80723574-80723662	MIRc_SINE_MIR	BIN_750	0.797112	chr2:80723200-80723600
chr2:221385928-221386071	MIR3_SINE_MIR	BIN_695	0.812156	chr2:221385600-221386000
chr3:74298968-74299097	MIRb_SINE_MIR	BIN_842	1.09311	chr3:74298800-74299200
chr3:87028707-87028891	MIR_SINE_MIR	BIN_850	0.862782	chr3:87028800-87029200
chr3:104873029-104873212	MIR_SINE_MIR	BIN_766	0.938236	chr3:104872800-104873200
chr3:127058474-127058725	MIRc_SINE_MIR	BIN_775	0.847996	chr3:127058400-127058800
chr3:142646759-142646969	MIR_SINE_MIR	BIN_782	0.812156	chr3:142646400-142646800
chr4:28096210-28096335	MIR_SINE_MIR	BIN_906	0.93188	chr4:28096000-28096400
chr4:102908385-102908620	MIR_SINE_MIR	BIN_859	0.812156	chr4:102908400-102908800
chr4:133226713-133226935	MIRb_SINE_MIR	BIN_870	1.0048	chr4:133226400-133226800
chr4:135200693-135200802	MIRb_SINE_MIR	BIN_872	0.862782	chr4:135200800-135201200
chr5:116502211-116502411	MIRb_SINE_MIR	BIN_953	0.847996	chr5:116502000-116502400
chr5:136778032-136778264	MIRb_SINE_MIR	BIN_966	0.812156	chr5:136778000-136778400
chr6:63095743-63095990	MIR_SINE_MIR	BIN_1100	0.839219	chr6:63095600-63096000
chr7:82590250-82590405	MIRb_SINE_MIR	BIN_1183	0.906829	chr7:82590000-82590400
chr7:83147779-83147944	MIRb_SINE_MIR	BIN_1184	0.842916	chr7:83147600-83148000
chr7:122953131-122953369	MIR_SINE_MIR	BIN_1133	0.812156	chr7:122953200-122953600
chr8:13557212-13557304	MIR3_SINE_MIR	BIN_1217	0.812156	chr8:13557200-13557600
chr8:60999663-60999824	MIRc_SINE_MIR	BIN_1249	0.842916	chr8:60999600-61000000
chr8:98148666-98148848	MIRb_SINE_MIR	BIN_1268	0.812156	chr8:98148400-98148800
chr9:29070017-29070072	MIRb_SINE_MIR	BIN_1286	0.867301	chr9:29070000-29070400
chr10:130711773-130711871	MIRc_SINE_MIR	BIN_11	0.812156	chr10:130711600-130712000
chr11:103543143-103543272	MIRb_SINE_MIR	BIN_56	0.900464	chr11:103543200-103543600
chr11:114950766-114950977	MIRb_SINE_MIR	BIN_63	0.906829	chr11:114950800-114951200
chr12:55744191-55744334	MIR_SINE_MIR	BIN_197	0.847996	chr12:55744000-55744400
chr12:84552458-84552555	MIR3_SINE_MIR	BIN_220	0.900464	chr12:84552400-84552800
chr12:85494734-85494879	MIRc_SINE_MIR	BIN_222	0.82848	chr12:85494800-85495200
chr14:20223088-20223213	MIR3_SINE_MIR	BIN_292	0.812156	chr14:20223200-20223600
chr14:90021978-90022159	MIRc_SINE_MIR	BIN_330	0.812705	chr14:90022000-90022400
chr15:90963171-90963299	MIR_SINE_MIR	BIN_370	0.893301	chr15:90962800-90963200
chr16:16874968-16875081	MIRb_SINE_MIR	BIN_375	0.900464	chr16:16874800-16875200
chr16:25281684-25281754	MIRb_SINE_MIR	BIN_383	0.847996	chr16:25281600-25282000
chr16:30977853-30978060	MIRb_SINE_MIR	BIN_394	0.9288	chr16:30977600-30978000
chr16:30977853-30978060	MIRb_SINE_MIR	BIN_395	1.00938	chr16:30978000-30978400
chr16:51071909-51072065	MIRb_SINE_MIR	BIN_417	0.812156	chr16:51072000-51072400
chr17:39103664-39103770	MIRc_SINE_MIR	BIN_458	1.0048	chr17:39103600-39104000
chr17:64398612-64398805	MIR_SINE_MIR	BIN_475	0.812705	chr17:64398400-64398800
chr18:51901549-51901770	MIR_SINE_MIR	BIN_514	0.826659	chr18:51901600-51902000
chr19:6994869-6995063	MIRb_SINE_MIR	BIN_556	0.95109	chr19:6994800-6995200
chr20:32623129-32623360	MIRb_SINE_MIR	BIN_582	0.797112	chr20:32623200-32623600
chr21:30331432-30331552	MIR_SINE_MIR	BIN_639	0.812156	chr21:30331200-30331600
chr22:36368525-36368637	MIR3_SINE_MIR	BIN_716	0.812156	chr22:36368400-36368800
chr22:48047901-48048091	MIRb_SINE_MIR	BIN_726	0.877693	chr22:48047600-48048000
chrX:34070760-34070851	MIR3_SINE_MIR	BIN_1347	0.813667	chrX:34070800-34071200
chrX:49772371-49772565	MIRb_SINE_MIR	BIN_1352	0.797112	chrX:49772000-49772400
chrX:133060690-133060752	MIRb_SINE_MIR	BIN_1325	0.862782	chrX:133060400-133060800
chr1:7364332-7365425	L1M5_LINE_L1	BIN_455	0.797112	chr1:7365200-7365600
chr1:33882204-33884407	L1MEc_LINE_L1	BIN_254	0.82848	chr1:33882400-33882800
chr1:42961608-42961779	L1MC4a_LINE_L1	BIN_304	1.0473	chr1:42961600-42962000
chr1:52358967-52360957	L1PA8_LINE_L1	BIN_340	0.862782	chr1:52360800-52361200
chr1:59332755-59333110	L1M5_LINE_L1	BIN_371	0.862782	chr1:59332800-59333200
chr1:65923212-65923431	L1PB4_LINE_L1	BIN_420	0.965983	chr1:65923200-65923600
chr1:66316078-66319213	L1MEc_LINE_L1	BIN_424	0.958998	chr1:66318000-66318400
chr1:69125806-69126706	L1MC4_LINE_L1	BIN_438	0.930378	chr1:69126000-69126400
chr1:69514837-69515228	L1PREC2_LINE_L1	BIN_439	0.82848	chr1:69515200-69515600
chr1:91805866-91807802	L1PA13_LINE_L1	BIN_538	0.972198	chr1:91806000-91806400
chr1:93661899-93663061	L1M5_LINE_L1	BIN_548	1.16952	chr1:93662800-93663200
chr1:93853554-93856453	L1PA5_LINE_L1	BIN_551	0.842916	chr1:93853200-93853600
chr1:94836137-94837279	L1MD2_LINE_L1	BIN_553	0.82848	chr1:94836400-94836800
chr1:96841376-96847817	L1PA3_LINE_L1	BIN_555	0.855774	chr1:96844000-96844400
chr1:100141955-100142234	L1PB4_LINE_L1	BIN_50	0.812156	chr1:100142000-100142400
chr1:111445338-111448756	L1M1_LINE_L1	BIN_62	0.812705	chr1:111448400-111448800
chr1:153019383-153020288	L1M4c_LINE_L1	BIN_93	0.797112	chr1:153019600-153020000
chr1:164254359-164255728	L1MCa_LINE_L1	BIN_110	0.797112	chr1:164254800-164255200
chr1:170248414-170248748	L1MA4A_LINE_L1	BIN_111	0.826659	chr1:170248400-170248800
chr1:175184245-175184579	L1MDa_LINE_L1	BIN_116	0.862782	chr1:175184400-175184800
chr1:176128285-176128996	L1ME3C_LINE_L1	BIN_118	0.930378	chr1:176128400-176128800
chr1:184949970-184950179	L1ME4a_LINE_L1	BIN_125	0.921589	chr1:184950000-184950400
chr1:191606160-191607372	L1ME2_LINE_L1	BIN_128	0.797112	chr1:191607200-191607600
chr1:196942278-196942967	L1MD2_LINE_L1	BIN_132	0.875785	chr1:196942400-196942800
chr1:247717070-247717994	L1M3_LINE_L1	BIN_187	0.906829	chr1:247717200-247717600
chr2:167378701-167380616	L1MEg_LINE_L1	BIN_665	0.95109	chr2:167380400-167380800
chr2:17878371-17878737	L1MEf_LINE_L1	BIN_671	0.977765	chr2:17878400-17878800
chr2:39926894-39929600	L1M4_LINE_L1	BIN_1379	0.797112	chr2:39927200-39927600
chr2:45598823-45599901	L1MEg_LINE_L1	BIN_736	0.812156	chr2:45599200-45599600
chr2:50471817-50471933	L1MA6_LINE_L1	BIN_737	0.875785	chr2:50471600-50472000
chr2:52021753-52027984	L1PB1_LINE_L1	BIN_738	0.911692	chr2:52024800-52025200
chr2:52487898-52488213	L1MEg_LINE_L1	BIN_739	0.797112	chr2:52488000-52488400
chr2:57285047-57289092	L1MA2_LINE_L1	BIN_740	0.862782	chr2:57286400-57286800
chr2:58514001-58514359	HAL1_LINE_L1	BIN_741	0.82848	chr2:58514000-58514400
chr2:81215855-81219622	L1MA3_LINE_L1	BIN_751	0.862782	chr2:81216000-81216400
chr2:86515577-86516989	L1ME3C_LINE_L1	BIN_754	0.812156	chr2:86516000-86516400
chr2:108571981-108572768	L1M4b_LINE_L1	BIN_612	0.875785	chr2:108572000-108572400
chr2:118915174-118918442	L1MB1_LINE_L1	BIN_622	0.915168	chr2:118916000-118916400
chr2:127171559-127174782	L1MA6_LINE_L1	BIN_634	0.812705	chr2:127171600-127172000
chr2:139247145-139248103	L1MEc_LINE_L1	BIN_644	0.900464	chr2:139247200-139247600
chr2:146125850-146126184	L1ME4a_LINE_L1	BIN_654	0.799691	chr2:146126000-146126400
chr2:154888827-154889360	L1MEf_LINE_L1	BIN_656	0.836409	chr2:154889200-154889600
chr2:157793915-157794133	HAL1-3A_ME_LINE_L1	BIN_659	0.875785	chr2:157794000-157794400
chr2:160196494-160198594	L1MA5A_LINE_L1	BIN_661	0.88731	chr2:160197600-160198000
chr2:163974510-163974647	L1ME4a_LINE_L1	BIN_663	0.95109	chr2:163974400-163974800
chr2:177565091-177567144	L1MEf_LINE_L1	BIN_669	0.81311	chr2:177565600-177566000
chr2:179162568-179163146	L1MB3_LINE_L1	BIN_672	0.842916	chr2:179162400-179162800
chr2:179845460-179845607	L1MA9_LINE_L1	BIN_673	0.812705	chr2:179845600-179846000
chr2:199786801-199787343	L1M4b_LINE_L1	BIN_683	0.900464	chr2:199786800-199787200
chr2:207896166-207896923	L1ME5_LINE_L1	BIN_687	0.826659	chr2:207896800-207897200
chr2:218453747-218455547	L1MEf_LINE_L1	BIN_693	0.847996	chr2:218454400-218454800
chr2:224257670-224262191	L1MC3_LINE_L1	BIN_700	0.812156	chr2:224260400-224260800
chr2:225752662-225752925	L1M2_LINE_L1	BIN_703	0.803174	chr2:225752800-225753200
chr2:225753201-225753265	L1M2_LINE_L1	BIN_704	0.888649	chr2:225753200-225753600
chr2:226011402-226012002	L1M1_LINE_L1	BIN_705	0.862782	chr2:226012000-226012400
chr2:226717578-226719024	L1PA2_LINE_L1	BIN_707	0.812156	chr2:226718000-226718400
chr2:229904381-229904841	L1MC4_LINE_L1	BIN_713	0.847996	chr2:229904000-229904400
chr3:168689575-168689890	L1MEe_LINE_L1	BIN_800	0.938236	chr3:168689600-168690000
chr3:22048169-22048335	L1MEd_LINE_L1	BIN_816	0.812156	chr3:22048000-22048400
chr3:22701974-22703083	L1MC1_LINE_L1	BIN_818	0.82848	chr3:22702400-22702800
chr3:22828581-22829189	L1MC4_LINE_L1	BIN_819	0.875785	chr3:22828800-22829200
chr3:25870644-25871018	L1PA14_LINE_L1	BIN_821	0.862782	chr3:25870400-25870800
chr3:29044402-29045017	L1MC2_LINE_L1	BIN_822	0.812156	chr3:29044800-29045200
chr3:35570327-35572901	L1MC1_LINE_L1	BIN_823	0.847996	chr3:35572400-35572800
chr3:39856494-39856894	L1MB8_LINE_L1	BIN_824	0.862782	chr3:39856800-39857200
chr3:39864804-39866199	L1MA5A_LINE_L1	BIN_825	0.82848	chr3:39865200-39865600
chr3:76135583-76137030	L1MC1_LINE_L1	BIN_843	0.812156	chr3:76135600-76136000
chr3:78281653-78283034	L1M1_LINE_L1	BIN_845	1.00366	chr3:78282800-78283200
chr3:84114854-84115843	L1MC4_LINE_L1	BIN_849	0.875785	chr3:84115200-84115600
chr3:88561394-88562829	L1PA7_LINE_L1	BIN_851	0.95109	chr3:88561600-88562000
chr3:96355618-96355976	L1PA15_LINE_L1	BIN_854	0.958998	chr3:96355600-96356000
chr3:96792957-96793369	L1M5_LINE_L1	BIN_855	0.847996	chr3:96793200-96793600
chr3:98206040-98208298	L1MA8_LINE_L1	BIN_856	0.972198	chr3:98208000-98208400
chr3:102025795-102032847	L1MA3_LINE_L1	BIN_760	0.88731	chr3:102029200-102029600
chr3:102032844-102033280	L1MA3_LINE_L1	BIN_761	0.839219	chr3:102033200-102033600
chr3:102541193-102541622	L1MEg_LINE_L1	BIN_762	0.82848	chr3:102540800-102541200
chr3:103161289-103161541	L1MC5_LINE_L1	BIN_763	0.797112	chr3:103161200-103161600
chr3:103529429-103529611	L1P4_LINE_L1	BIN_765	0.82848	chr3:103529600-103530000
chr3:117171303-117171414	L1ME4a_LINE_L1	BIN_769	0.812156	chr3:117171200-117171600
chr3:121594392-121596048	L1MEe_LINE_L1	BIN_772	0.862782	chr3:121594000-121594400
chr3:125026798-125027613	L1ME2_LINE_L1	BIN_773	0.862782	chr3:125027200-125027600
chr3:132193495-132193625	L1ME2z_LINE_L1	BIN_776	1.01284	chr3:132193600-132194000
chr3:137394949-137396126	L1MA3_LINE_L1	BIN_780	0.812156	chr3:137395200-137395600
chr3:144690713-144691636	L1PA8_LINE_L1	BIN_784	0.812156	chr3:144690400-144690800
chr3:150666300-150669062	L1PA14_LINE_L1	BIN_790	0.847996	chr3:150667600-150668000
chr3:153487754-153489546	L1PA15-16_LINE_L1	BIN_791	0.938236	chr3:153488800-153489200
chr3:156586385-156588744	L1MA4A_LINE_L1	BIN_794	0.847996	chr3:156587200-156587600
chr3:157452468-157454886	L1M3f_LINE_L1	BIN_796	0.82848	chr3:157454400-157454800
chr3:161646477-161647136	L1MEe_LINE_L1	BIN_797	0.911692	chr3:161646400-161646800
chr3:162983422-162984761	L1PB4_LINE_L1	BIN_798	0.842916	chr3:162983600-162984000
chr3:170671985-170672988	L1MEc_LINE_L1	BIN_802	0.862782	chr3:170672800-170673200
chr3:174224323-174224728	L1ME4a_LINE_L1	BIN_804	0.862782	chr3:174224400-174224800
chr3:180455674-180456014	L1MA8_LINE_L1	BIN_806	0.812156	chr3:180456000-180456400
chr3:193742911-193742958	HAL1-3A_ME_LINE_L1	BIN_811	0.907452	chr3:193742800-193743200
chr4:8301865-8302452	L1M5_LINE_L1	BIN_939	0.862941	chr4:8302400-8302800
chr4:12260672-12261220	L1PA12_LINE_L1	BIN_867	0.842916	chr4:12260800-12261200
chr4:13430890-13431824	L1M4_LINE_L1	BIN_871	0.847996	chr4:13431600-13432000
chr4:49314308-49314637	L1MB8_LINE_L1	BIN_918	0.96487	chr4:49314400-49314800
chr4:56640223-56644096	L1MA6_LINE_L1	BIN_924	0.911692	chr4:56641200-56641600
chr4:60343844-60349065	L1MB1_LINE_L1	BIN_928	0.915168	chr4:60346000-60346400
chr4:60754728-60755027	L1MC5_LINE_L1	BIN_929	0.850585	chr4:60754800-60755200
chr4:63694238-63695729	L1MD2_LINE_L1	BIN_930	0.82848	chr4:63694800-63695200
chr4:69171497-69171887	L1MA9_LINE_L1	BIN_932	0.842916	chr4:69171600-69172000
chr4:94369146-94369578	L1MC4_LINE_L1	BIN_942	0.847996	chr4:94369200-94369600
chr4:95823310-95823367	L1M5_LINE_L1	BIN_943	0.799691	chr4:95823200-95823600
chr4:99761407-99761684	L1MEf_LINE_L1	BIN_945	0.95109	chr4:99761600-99762000
chr4:99957712-99959765	L1MC4a_LINE_L1	BIN_946	1.17473	chr4:99959600-99960000
chr4:132192621-132193067	L1M3f_LINE_L1	BIN_869	0.82848	chr4:132192400-132192800
chr4:137136067-137142056	L1PA15_LINE_L1	BIN_874	0.911692	chr4:137138400-137138800
chr4:141354226-141354399	L1ME3C_LINE_L1	BIN_875	0.862782	chr4:141354000-141354400
chr4:143928814-143930618	L1MD2_LINE_L1	BIN_878	0.826659	chr4:143929200-143929600
chr4:147671458-147673149	L1M2a_LINE_L1	BIN_879	0.812156	chr4:147672000-147672400
chr4:148094062-148094390	L1ME4a_LINE_L1	BIN_880	0.867301	chr4:148094000-148094400
chr4:148582964-148583631	L1ME3A_LINE_L1	BIN_881	0.875785	chr4:148583200-148583600
chr4:155199210-155200487	L1MB2_LINE_L1	BIN_884	0.812156	chr4:155200400-155200800
chr4:156093848-156094689	L1PB3_LINE_L1	BIN_885	0.862782	chr4:156093600-156094000
chr4:161455709-161458916	L1MCa_LINE_L1	BIN_890	1.0473	chr4:161456400-161456800
chr4:166491626-166491676	L1PA8A_LINE_L1	BIN_891	0.812156	chr4:166491600-166492000
chr4:171589019-171590400	L1MC1_LINE_L1	BIN_893	0.847996	chr4:171590400-171590800
chr4:174736323-174737576	L1MB7_LINE_L1	BIN_897	0.900464	chr4:174736800-174737200
chr4:190841482-190844892	L1M1_LINE_L1	BIN_901	0.796223	chr4:190844400-190844800
chr5:7415027-7415104	L1MA7_LINE_L1	BIN_1010	0.796223	chr5:7414800-7415200
chr5:13879641-13882654	L1M3de_LINE_L1	BIN_969	0.812156	chr5:13881200-13881600
chr5:18348210-18349234	L1MCa_LINE_L1	BIN_983	1.05237	chr5:18348400-18348800
chr5:22089852-22090695	L1MB8_LINE_L1	BIN_987	0.921589	chr5:22090000-22090400
chr5:22600417-22600757	L1ME3F_LINE_L1	BIN_988	0.867301	chr5:22600400-22600800
chr5:27327266-27327888	L1ME3A_LINE_L1	BIN_993	0.906829	chr5:27327600-27328000
chr5:29910867-29912166	L1PA15_LINE_L1	BIN_996	0.875785	chr5:29912000-29912400
chr5:65384697-65385495	L1MEc_LINE_L1	BIN_1008	0.862782	chr5:65384800-65385200
chr5:72541059-72541435	L1ME3C_LINE_L1	BIN_1009	0.847996	chr5:72540800-72541200
chr5:76822960-76825766	L1MB5_LINE_L1	BIN_1012	0.812156	chr5:76822800-76823200
chr5:91571250-91577319	L1PB2_LINE_L1	BIN_1016	0.847996	chr5:91574000-91574400
chr5:98182511-98183702	L1MC1_LINE_L1	BIN_1021	0.88731	chr5:98182400-98182800
chr5:99216214-99217880	L1M1_LINE_L1	BIN_1022	0.958998	chr5:99216400-99216800
chr5:104161389-104163050	L1M5_LINE_L1	BIN_949	0.812705	chr5:104162400-104162800
chr5:109829950-109830686	L1ME3E_LINE_L1	BIN_951	1.0473	chr5:109830400-109830800
chr5:125553433-125553736	L1MC5_LINE_L1	BIN_957	0.95109	chr5:125553600-125554000
chr5:129122738-129124074	L1M1_LINE_L1	BIN_960	0.921589	chr5:129123200-129123600
chr5:131640788-131641497	L1MB7_LINE_L1	BIN_962	0.900464	chr5:131641200-131641600
chr5:135943305-135944108	L1MA6_LINE_L1	BIN_965	0.855774	chr5:135943600-135944000
chr5:150890902-150891274	L1ME5_LINE_L1	BIN_975	0.812156	chr5:150891200-150891600
chr5:159806355-159806440	L1MC4_LINE_L1	BIN_977	0.862782	chr5:159806400-159806800
chr6:14261612-14264491	L1MEg_LINE_L1	BIN_1036	0.812156	chr6:14263200-14263600
chr6:23244290-23244412	L1MB4_LINE_L1	BIN_1057	0.812156	chr6:23244400-23244800
chr6:29205774-29206591	L1PREC2_LINE_L1	BIN_1082	0.812156	chr6:29206000-29206400
chr6:36124961-36125089	L1M7_LINE_L1	BIN_1085	0.897594	chr6:36124800-36125200
chr6:40328846-40330504	L1MC4_LINE_L1	BIN_1090	0.812156	chr6:40329600-40330000
chr6:57580965-57581608	L1MEe_LINE_L1	BIN_1098	0.797112	chr6:57581200-57581600
chr6:65409381-65411362	L1P4_LINE_L1	BIN_1102	0.875785	chr6:65410400-65410800
chr6:66384370-66387834	L1MB1_LINE_L1	BIN_1103	0.826659	chr6:66384400-66384800
chr6:78762720-78763014	L1ME1_LINE_L1	BIN_1109	0.965983	chr6:78762800-78763200
chr6:80231373-80232408	L1MC5_LINE_L1	BIN_1110	0.82848	chr6:80232000-80232400
chr6:89511579-89511749	L1MEd_LINE_L1	BIN_1114	0.895685	chr6:89511200-89511600
chr6:93910959-93911816	L1ME1_LINE_L1	BIN_1117	0.812156	chr6:93911200-93911600
chr6:97040679-97041756	L1MEg_LINE_L1	BIN_1382	0.900464	chr6:97040800-97041200
chr6:98592762-98593057	L1MC4_LINE_L1	BIN_1119	0.82848	chr6:98592800-98593200
chr6:104639644-104643083	L1PB3_LINE_L1	BIN_1026	0.842916	chr6:104640400-104640800
chr6:121565986-121570352	L1PB2_LINE_L1	BIN_1029	0.860919	chr6:121568800-121569200
chr6:125336504-125336636	L1M5_LINE_L1	BIN_1031	0.82848	chr6:125336400-125336800
chr6:143664861-143666360	L1PA13_LINE_L1	BIN_1037	0.82848	chr6:143664800-143665200
chr6:143984538-143985569	L1MEe_LINE_L1	BIN_1038	0.850585	chr6:143985200-143985600
chr6:144172713-144178208	L1PA7_LINE_L1	BIN_1039	0.847996	chr6:144176000-144176400
chr6:145897654-145899797	L1M1_LINE_L1	BIN_1042	0.999999	chr6:145898000-145898400
chr6:151880861-151882206	L1PA17_LINE_L1	BIN_1047	0.847996	chr6:151881200-151881600
chr7:2636008-2636105	L1ME4a_LINE_L1	BIN_1155	0.812156	chr7:2636000-2636400
chr7:12244153-12244885	L1ME2_LINE_L1	BIN_1132	0.847996	chr7:12244400-12244800
chr7:24810284-24810768	L1MCa_LINE_L1	BIN_1153	0.812156	chr7:24810400-24810800
chr7:34718744-34719090	L1ME3B_LINE_L1	BIN_1157	0.842916	chr7:34718800-34719200
chr7:64152728-64153366	L1M3a_LINE_L1	BIN_1167	0.812705	chr7:64152800-64153200
chr7:75496775-75497061	L1ME1_LINE_L1	BIN_1175	1.00187	chr7:75496800-75497200
chr7:81921120-81921286	HAL1_LINE_L1	BIN_1182	0.958998	chr7:81921200-81921600
chr7:87289196-87290341	L1M5_LINE_L1	BIN_1186	0.82848	chr7:87290000-87290400
chr7:87379196-87382957	L1PA3_LINE_L1	BIN_1187	0.812156	chr7:87380000-87380400
chr7:88995602-88995822	L1MA8_LINE_L1	BIN_1188	0.812156	chr7:88995600-88996000
chr7:92703774-92705373	L1MA5_LINE_L1	BIN_1383	0.847996	chr7:92704000-92704400
chr7:96475537-96475901	L1MD2_LINE_L1	BIN_1191	0.839219	chr7:96475600-96476000
chr7:97449901-97451112	L1MC4a_LINE_L1	BIN_1192	0.82848	chr7:97450400-97450800
chr7:106384142-106384666	L1MC5_LINE_L1	BIN_1125	0.862782	chr7:106384400-106384800
chr7:109880929-109881456	L1MA9_LINE_L1	BIN_1127	0.875785	chr7:109880800-109881200
chr7:123140674-123140975	HAL1_LINE_L1	BIN_1134	0.847996	chr7:123140800-123141200
chr7:130541351-130544670	L1MA4_LINE_L1	BIN_1139	0.862782	chr7:130543600-130544000
chr7:147271685-147272196	HAL1_LINE_L1	BIN_1144	0.812705	chr7:147272000-147272400
chr7:150996292-150996508	L1MC5_LINE_L1	BIN_1147	0.911692	chr7:150996400-150996800
chr7:153174220-153174756	L1ME1_LINE_L1	BIN_1150	0.847996	chr7:153174400-153174800
chr8:31875963-31876623	L1ME3_LINE_L1	BIN_1230	0.797112	chr8:31876000-31876400
chr8:33019580-33020264	L1M5_LINE_L1	BIN_1232	0.88731	chr8:33020000-33020400
chr8:34515842-34516253	L1PB2_LINE_L1	BIN_1234	0.82848	chr8:34515600-34516000
chr8:39227643-39230858	L1PB1_LINE_L1	BIN_1237	0.977765	chr8:39230800-39231200
chr8:54734649-54736061	L1MC4a_LINE_L1	BIN_1243	0.847996	chr8:54734800-54735200
chr8:59529712-59530868	L1PA6_LINE_L1	BIN_1247	0.847996	chr8:59530800-59531200
chr8:60658797-60661900	L1ME3A_LINE_L1	BIN_1248	0.797112	chr8:60659600-60660000
chr8:64567797-64567936	L1M5_LINE_L1	BIN_1251	0.862782	chr8:64567600-64568000
chr8:71762728-71765246	L1PA7_LINE_L1	BIN_1255	0.900464	chr8:71765200-71765600
chr8:76179863-76180363	L1MEe_LINE_L1	BIN_1259	0.812156	chr8:76180000-76180400
chr8:76261464-76263832	L1PB_LINE_L1	BIN_1260	0.812156	chr8:76263200-76263600
chr8:83309962-83310218	L1MEe_LINE_L1	BIN_1262	0.812156	chr8:83310000-83310400
chr8:84179141-84179194	L1MC4a_LINE_L1	BIN_1263	0.900464	chr8:84178800-84179200
chr8:104474315-104474699	L1MCc_LINE_L1	BIN_1194	0.88731	chr8:104474000-104474400
chr8:111318545-111318885	L1MEd_LINE_L1	BIN_1198	0.82848	chr8:111318400-111318800
chr8:114041379-114044011	L1MD2_LINE_L1	BIN_1201	0.839219	chr8:114042400-114042800
chr8:116101562-116101857	L1MC1_LINE_L1	BIN_1202	0.875785	chr8:116101600-116102000
chr8:118375031-118375390	L1MD_LINE_L1	BIN_1204	1.13104	chr8:118375200-118375600
chr8:119907995-119908318	L1ME5_LINE_L1	BIN_1205	0.877693	chr8:119908000-119908400
chr8:122342118-122347047	L1HS_LINE_L1	BIN_1206	0.847996	chr8:122344800-122345200
chr8:122667108-122667765	L1MDa_LINE_L1	BIN_1207	0.797112	chr8:122667200-122667600
chr8:123610199-123610438	L1MEd_LINE_L1	BIN_1208	0.812156	chr8:123610400-123610800
chr8:127347847-127350825	L1PB2_LINE_L1	BIN_1211	0.862782	chr8:127350400-127350800
chr8:129701985-129706581	L1MD1_LINE_L1	BIN_1212	0.847996	chr8:129702800-129703200
chr8:130059540-130059915	L1ME3A_LINE_L1	BIN_1213	0.911692	chr8:130059600-130060000
chr8:132849174-132850561	L1PA15_LINE_L1	BIN_1214	0.921589	chr8:132848800-132849200
chr8:132957897-132958236	L1MA4A_LINE_L1	BIN_1215	0.900464	chr8:132957600-132958000
chr8:133021158-133021260	L1ME2_LINE_L1	BIN_1216	0.938236	chr8:133021200-133021600
chr8:140449522-140451357	L1M4_LINE_L1	BIN_1218	0.911692	chr8:140449600-140450000
chr8:141002286-141002508	L1ME3C_LINE_L1	BIN_1219	0.862782	chr8:141002000-141002400
chr9:5740888-5742259	L1MEg_LINE_L1	BIN_1293	0.900464	chr9:5741600-5742000
chr9:22270527-22270575	L1MC4_LINE_L1	BIN_1283	0.813421	chr9:22270400-22270800
chr9:29140036-29142610	L1M4c_LINE_L1	BIN_1287	0.812705	chr9:29141200-29141600
chr9:32285156-32285370	L1ME4a_LINE_L1	BIN_1288	0.799691	chr9:32285200-32285600
chr9:80630524-80630885	L1M5_LINE_L1	BIN_1300	0.82848	chr9:80630400-80630800
chr9:86356352-86356649	L1MC4_LINE_L1	BIN_1305	0.875785	chr9:86356000-86356400
chr9:98633506-98634152	L1PB4_LINE_L1	BIN_1306	0.812156	chr9:98634000-98634400
chr9:102417538-102417996	L1M4_LINE_L1	BIN_1270	0.897594	chr9:102417600-102418000
chr9:113441178-113442651	L1MEe_LINE_L1	BIN_1276	0.855774	chr9:113441600-113442000
chr10:5584002-5584819	L1MD_LINE_L1	BIN_30	0.842916	chr10:5584000-5584400
chr10:14331588-14332776	L1MB1_LINE_L1	BIN_12	0.842916	chr10:14331600-14332000
chr10:26945752-26946034	L1MEg_LINE_L1	BIN_22	0.915168	chr10:26946000-26946400
chr10:28088676-28088872	L1ME4a_LINE_L1	BIN_23	0.958998	chr10:28088400-28088800
chr10:52125172-52125729	L1PA8_LINE_L1	BIN_28	0.812156	chr10:52125200-52125600
chr10:59559834-59562900	L1ME1_LINE_L1	BIN_33	0.82848	chr10:59562400-59562800
chr10:67408370-67409217	L1MEf_LINE_L1	BIN_39	0.812156	chr10:67408400-67408800
chr10:82256801-82256941	L1ME1_LINE_L1	BIN_43	0.842916	chr10:82256800-82257200
chr10:87568517-87569307	L1MEg_LINE_L1	BIN_1374	0.900464	chr10:87568800-87569200
chr10:122807615-122807935	L1ME3C_LINE_L1	BIN_6	0.812156	chr10:122807600-122808000
chr11:2565728-2567903	L1ME1_LINE_L1	BIN_78	0.951694	chr11:2566400-2566800
chr11:25327159-25328763	L1PA7_LINE_L1	BIN_77	0.847996	chr11:25327600-25328000
chr11:30968649-30968840	L1MEe_LINE_L1	BIN_81	0.900464	chr11:30968400-30968800
chr11:74639820-74640091	L1MC4a_LINE_L1	BIN_115	0.862782	chr11:74640000-74640400
chr11:75550069-75550589	L1MC4_LINE_L1	BIN_117	0.850585	chr11:75550400-75550800
chr11:81609972-81611092	L1MEc_LINE_L1	BIN_121	0.958998	chr11:81610800-81611200
chr11:82415963-82416418	L1PB4_LINE_L1	BIN_122	0.862782	chr11:82416000-82416400
chr11:90611869-90616750	L1PA4_LINE_L1	BIN_126	0.797112	chr11:90611600-90612000
chr11:90852892-90853748	L1M4_LINE_L1	BIN_127	0.812156	chr11:90853200-90853600
chr11:91753197-91754849	L1MEc_LINE_L1	BIN_129	0.82848	chr11:91754000-91754400
chr11:94183533-94183999	L1M5_LINE_L1	BIN_131	0.801644	chr11:94183600-94184000
chr11:101941249-101942051	L1M2_LINE_L1	BIN_54	0.812705	chr11:101941200-101941600
chr11:105197738-105198126	L1MB5_LINE_L1	BIN_58	0.804406	chr11:105198000-105198400
chr11:122317030-122317610	L1PB1_LINE_L1	BIN_64	0.82848	chr11:122317600-122318000
chr11:130840362-130840539	L1PA16_LINE_L1	BIN_67	0.977765	chr11:130840400-130840800
chr12:4208951-4210188	L1MC2_LINE_L1	BIN_182	0.877693	chr12:4209600-4210000
chr12:15573903-15574086	L1MC5_LINE_L1	BIN_155	0.95109	chr12:15574000-15574400
chr12:17617753-17620248	L1M4_LINE_L1	BIN_159	0.875785	chr12:17619600-17620000
chr12:17722610-17722691	L1ME5_LINE_L1	BIN_160	1.01624	chr12:17722400-17722800
chr12:18426135-18426500	L1PA4_LINE_L1	BIN_161	0.847996	chr12:18426000-18426400
chr12:26232537-26233375	L1MA9_LINE_L1	BIN_166	0.812705	chr12:26233200-26233600
chr12:29064926-29065142	L1M4_LINE_L1	BIN_168	0.799691	chr12:29064800-29065200
chr12:38580123-38582171	L1M1_LINE_L1	BIN_180	0.825295	chr12:38580400-38580800
chr12:42599474-42599720	L1MEd_LINE_L1	BIN_185	0.82848	chr12:42599600-42600000
chr12:47272143-47275627	L1PA8A_LINE_L1	BIN_186	0.847996	chr12:47274000-47274400
chr12:48087654-48089404	L1ME3F_LINE_L1	BIN_188	0.875785	chr12:48089200-48089600
chr12:74707537-74709005	L1P4_LINE_L1	BIN_203	0.875785	chr12:74708000-74708400
chr12:76761040-76762549	L1M4c_LINE_L1	BIN_207	0.812705	chr12:76761200-76761600
chr12:78226276-78226602	L1MA3_LINE_L1	BIN_209	1.05087	chr12:78226000-78226400
chr12:80404891-80406788	L1M2_LINE_L1	BIN_212	0.847996	chr12:80406400-80406800
chr12:80620708-80621454	HAL1_LINE_L1	BIN_213	0.82848	chr12:80620800-80621200
chr12:81079094-81079487	L1ME2_LINE_L1	BIN_214	0.847996	chr12:81079200-81079600
chr12:84681928-84682348	L1MC_LINE_L1	BIN_221	0.972198	chr12:84681600-84682000
chr12:102983731-102983995	L1ME3C_LINE_L1	BIN_1376	0.911692	chr12:102983600-102984000
chr13:21303601-21303679	HAL1-3A_ME_LINE_L1	BIN_240	0.812705	chr13:21303600-21304000
chr13:27265155-27266084	L1MEb_LINE_L1	BIN_243	0.842916	chr13:27265200-27265600
chr13:34872653-34874034	L1MEc_LINE_L1	BIN_250	1.05237	chr13:34872800-34873200
chr13:38387201-38389355	L1MB7_LINE_L1	BIN_253	0.900464	chr13:38389200-38389600
chr13:38870260-38871420	L1MA9_LINE_L1	BIN_255	0.875785	chr13:38870800-38871200
chr13:56731464-56731688	L1PA16_LINE_L1	BIN_265	0.900464	chr13:56731600-56732000
chr13:58652810-58653026	L1MA9_LINE_L1	BIN_268	0.862782	chr13:58652800-58653200
chr13:62702740-62703010	L1PB4_LINE_L1	BIN_269	0.921589	chr13:62702800-62703200
chr13:71625524-71625783	L1MB3_LINE_L1	BIN_271	0.799691	chr13:71625200-71625600
chr13:80461169-80467371	L1PA6_LINE_L1	BIN_275	0.847996	chr13:80465600-80466000
chr13:88661821-88662762	L1M1_LINE_L1	BIN_281	0.930378	chr13:88662400-88662800
chr13:90728058-90729508	L1M4b_LINE_L1	BIN_282	0.958998	chr13:90728000-90728400
chr13:94140229-94142507	L1PA5_LINE_L1	BIN_284	0.794242	chr13:94142400-94142800
chr13:105717411-105717461	L1MC4_LINE_L1	BIN_236	0.801644	chr13:105717200-105717600
chr13:109993190-109993233	L1M7_LINE_L1	BIN_238	0.812705	chr13:109993200-109993600
chr14:27487264-27488004	L1M5_LINE_L1	BIN_300	0.875785	chr14:27487600-27488000
chr14:27966210-27966642	L1ME3_LINE_L1	BIN_303	0.958998	chr14:27966400-27966800
chr14:30529898-30531948	L1MA6_LINE_L1	BIN_306	0.855774	chr14:30531600-30532000
chr14:45860277-45862784	L1MA2_LINE_L1	BIN_314	0.797112	chr14:45860000-45860400
chr14:46945560-46945709	L1M5_LINE_L1	BIN_315	0.82848	chr14:46945600-46946000
chr14:68997187-68998433	L1MEe_LINE_L1	BIN_323	0.875785	chr14:68997200-68997600
chr14:76476779-76476901	L1ME2z_LINE_L1	BIN_327	0.855774	chr14:76476800-76477200
chr14:91354336-91354554	L1MC5_LINE_L1	BIN_332	0.842916	chr14:91354400-91354800
chr14:94130590-94131390	L1MEd_LINE_L1	BIN_333	0.900464	chr14:94131200-94131600
chr15:44433102-44433783	L1MEe_LINE_L1	BIN_348	0.847996	chr15:44433600-44434000
chr15:34540205-34540470	L1ME3A_LINE_L1	BIN_343	0.839219	chr15:34540400-34540800
chr15:56691187-56697340	L1PA6_LINE_L1	BIN_354	0.847996	chr15:56692400-56692800
chr15:58391582-58392179	L1MB7_LINE_L1	BIN_356	0.812156	chr15:58392000-58392400
chr15:73850870-73851590	L1ME1_LINE_L1	BIN_363	0.812156	chr15:73850800-73851200
chr15:81533963-81534196	L1MD1_LINE_L1	BIN_365	0.82848	chr15:81534000-81534400
chr15:84399373-84399983	L1MA9_LINE_L1	BIN_366	0.797112	chr15:84399600-84400000
chr15:98264603-98268179	L1MEc_LINE_L1	BIN_372	0.797112	chr15:98265600-98266000
chr16:3979730-3980983	L1MEe_LINE_L1	BIN_410	0.812156	chr16:3980000-3980400
chr16:5904616-5906152	L1MA9_LINE_L1	BIN_419	0.812705	chr16:5905200-5905600
chr16:31920753-31925460	L1M1_LINE_L1	BIN_405	0.906829	chr16:31922000-31922400
chr16:33589806-33590980	L1M4_LINE_L1	BIN_406	0.95109	chr16:33590000-33590400
chr16:47832452-47832887	L1M5_LINE_L1	BIN_415	0.847996	chr16:47832400-47832800
chr16:50900928-50902569	L1ME2_LINE_L1	BIN_416	0.839219	chr16:50901200-50901600
chr16:59818410-59821635	L1MC3_LINE_L1	BIN_421	0.842916	chr16:59820000-59820400
chr16:76801229-76802103	L1MC3_LINE_L1	BIN_433	0.921589	chr16:76801600-76802000
chr17:51904226-51905187	L1MEg_LINE_L1	BIN_466	0.921589	chr17:51904400-51904800
chr17:11504120-11504570	L1MB1_LINE_L1	BIN_441	0.812156	chr17:11504400-11504800
chr17:26894251-26894676	L1MC5_LINE_L1	BIN_448	0.862782	chr17:26894400-26894800
chr17:39035609-39035803	L1PA13_LINE_L1	BIN_457	0.862782	chr17:39035600-39036000
chr17:46417689-46418226	L1M5_LINE_L1	BIN_460	0.812156	chr17:46417600-46418000
chr17:48334047-48334210	L1MEg1_LINE_L1	BIN_463	0.921589	chr17:48334000-48334400
chr17:49586535-49586747	L1M5_LINE_L1	BIN_464	0.842916	chr17:49586400-49586800
chr17:51042209-51043056	L1MD1_LINE_L1	BIN_465	0.842916	chr17:51042000-51042400
chr17:59986774-59987400	L1PB4_LINE_L1	BIN_470	0.847996	chr17:59987200-59987600
chr17:61639467-61639872	L1M7_LINE_L1	BIN_472	0.842916	chr17:61639600-61640000
chr17:75714401-75714479	L1ME1_LINE_L1	BIN_480	0.82848	chr17:75714400-75714800
chr18:1067240-1069281	L1MEc_LINE_L1	BIN_491	0.812156	chr18:1067200-1067600
chr18:10392577-10394343	L1MDa_LINE_L1	BIN_490	0.82848	chr18:10393600-10394000
chr18:25117400-25118515	L1MC4a_LINE_L1	BIN_496	0.875785	chr18:25118400-25118800
chr18:30293621-30293889	L1ME4a_LINE_L1	BIN_499	0.797112	chr18:30293600-30294000
chr18:30848705-30854586	L1MB7_LINE_L1	BIN_500	0.965983	chr18:30850400-30850800
chr18:36980617-36980811	L1PA3_LINE_L1	BIN_503	0.82848	chr18:36980400-36980800
chr18:38306686-38307644	L1P3_LINE_L1	BIN_504	0.900464	chr18:38306800-38307200
chr18:40875424-40876758	L1MD_LINE_L1	BIN_507	0.847996	chr18:40876000-40876400
chr18:56407122-56408474	L1ME3F_LINE_L1	BIN_515	0.88731	chr18:56407600-56408000
chr18:60336689-60337727	L1M4_LINE_L1	BIN_519	0.812705	chr18:60337200-60337600
chr18:63361631-63362207	L1M5_LINE_L1	BIN_522	0.812156	chr18:63362000-63362400
chr18:67323133-67323240	L1MEe_LINE_L1	BIN_526	0.862782	chr18:67323200-67323600
chr18:69118434-69119000	L1M2_LINE_L1	BIN_528	0.88731	chr18:69118400-69118800
chr18:69631192-69631638	L1MCa_LINE_L1	BIN_529	0.862782	chr18:69631600-69632000
chr18:75516213-75517912	L1MD1_LINE_L1	BIN_532	0.847996	chr18:75516800-75517200
chr19:351904-352092	L1M4b_LINE_L1	BIN_547	0.80086	chr19:351600-352000
chr19:20180750-20181673	L1PB_LINE_L1	BIN_540	0.842916	chr19:20180800-20181200
chr20:6296468-6302491	L1PA2_LINE_L1	BIN_607	0.812156	chr20:6296400-6296800
chr20:7055335-7057011	L1MB7_LINE_L1	BIN_608	0.862782	chr20:7056800-7057200
chr20:11390612-11390740	L1MC3_LINE_L1	BIN_561	0.900464	chr20:11390400-11390800
chr20:14642799-14644125	L1PA13_LINE_L1	BIN_562	0.82848	chr20:14644000-14644400
chr20:30711168-30711365	L1M5_LINE_L1	BIN_577	0.842916	chr20:30711200-30711600
chr20:39241958-39244827	L1ME2z_LINE_L1	BIN_585	0.895685	chr20:39244000-39244400
chr20:39901187-39902618	L1MB5_LINE_L1	BIN_586	0.82848	chr20:39902400-39902800
chr20:54341468-54342013	L1MA8_LINE_L1	BIN_601	0.839219	chr20:54342000-54342400
chr20:58279064-58279235	L1M5_LINE_L1	BIN_603	0.867301	chr20:58279200-58279600
chr21:9680865-9681237	L1MCa_LINE_L1	BIN_679	0.929632	chr21:9680800-9681200
chr21:10104770-10110899	L1PA4_LINE_L1	BIN_613	1.0048	chr21:10107200-10107600
chr21:20001594-20002419	L1MCa_LINE_L1	BIN_623	0.812156	chr21:20002400-20002800
chr21:20098764-20101741	L1MA4A_LINE_L1	BIN_624	0.82848	chr21:20100400-20100800
chr21:23516594-23517296	L1ME3E_LINE_L1	BIN_627	0.875785	chr21:23516400-23516800
chr21:24395109-24395271	L1PA13_LINE_L1	BIN_628	1.0048	chr21:24395200-24395600
chr21:26126564-26127221	L1MEc_LINE_L1	BIN_631	0.797112	chr21:26127200-26127600
chr21:29492194-29492848	L1MC1_LINE_L1	BIN_637	0.900464	chr21:29492400-29492800
chr21:31734104-31735874	L1PB4_LINE_L1	BIN_640	0.812156	chr21:31734400-31734800
chr22:20741935-20742063	L1MB8_LINE_L1	BIN_694	0.797112	chr22:20741600-20742000
chr22:25691208-25692095	L1ME1_LINE_L1	BIN_702	0.797112	chr22:25692000-25692400
chr22:28132648-28133179	L1MD_LINE_L1	BIN_710	0.900464	chr22:28132800-28133200
chr22:32784385-32784532	L1ME4a_LINE_L1	BIN_714	0.839219	chr22:32784400-32784800
chr22:37977196-37977598	L1ME4a_LINE_L1	BIN_717	0.812156	chr22:37977200-37977600
chrX:17082737-17083612	L1MB8_LINE_L1	BIN_1338	0.812156	chrX:17082800-17083200
chrX:19567019-19567513	L1ME4a_LINE_L1	BIN_1339	0.812156	chrX:19566800-19567200
chrX:22694975-22700721	L1PA5_LINE_L1	BIN_1340	0.847996	chrX:22698000-22698400
chrX:47702520-47702733	L1MB8_LINE_L1	BIN_1351	1.01284	chrX:47702400-47702800
chrX:55700953-55702131	L1M1_LINE_L1	BIN_1355	0.812156	chrX:55701200-55701600
chrX:70097172-70097913	L1MB2_LINE_L1	BIN_1358	0.867301	chrX:70097600-70098000
chrX:76626294-76630537	L1PA7_LINE_L1	BIN_1362	0.812156	chrX:76626800-76627200
chrX:79656300-79658521	L1M2_LINE_L1	BIN_1363	0.812705	chrX:79657600-79658000
chrX:87204548-87205334	L1MB1_LINE_L1	BIN_1366	0.965983	chrX:87204800-87205200
chrX:87508709-87509262	L1MB7_LINE_L1	BIN_1367	0.875785	chrX:87508800-87509200
chrX:90279139-90280844	L1MB3_LINE_L1	BIN_1368	0.911692	chrX:90279200-90279600
chrX:97925677-97926578	L1M1_LINE_L1	BIN_1369	0.82848	chrX:97926000-97926400
chrX:110267729-110271194	L1PB1_LINE_L1	BIN_1384	0.812156	chrX:110268000-110268400
chrX:113403248-113403508	L1MC4a_LINE_L1	BIN_1313	1.05087	chrX:113403200-113403600
chrX:116721681-116723233	L1M1_LINE_L1	BIN_1314	0.847996	chrX:116722000-116722400
chrX:124749314-124750822	L1M4c_LINE_L1	BIN_1321	0.826659	chrX:124750000-124750400
chrX:127232697-127233220	L1M4_LINE_L1	BIN_1322	0.812156	chrX:127232800-127233200
chrX:141480362-141483576	L1M1_LINE_L1	BIN_1328	0.958998	chrX:141480800-141481200
chrX:142793503-142793640	L1MD_LINE_L1	BIN_1329	0.799691	chrX:142793600-142794000
chrX:143918488-143919134	L1M5_LINE_L1	BIN_1331	0.82848	chrX:143918800-143919200
chrX:146334726-146335300	L1M4b_LINE_L1	BIN_1332	0.812156	chrX:146334800-146335200
chrX:154248251-154249400	L1M5_LINE_L1	BIN_1335	0.842916	chrX:154249200-154249600
chrX:154397488-154397722	L1M5_LINE_L1	BIN_1336	0.911692	chrX:154397600-154398000
chr1:8326686-8327257	LTR24C_LTR_ERV1	BIN_502	0.875785	chr1:8326800-8327200
chr1:25535020-25535676	LTR5_LTR_ERVK,Helitron3Na_Mam_RC_Helitron,L2a_LINE_L2,L2a_LINE_L2,Helitron3Na_Mam_RC_Helitron	BIN_196	1.12364	chr1:25534800-25535200
chr1:30647420-30647877	MLT1D_LTR_ERVL-MaLR,MER65A_LTR_ERV1,MER101-int_LTR_ERV1	BIN_233	0.812156	chr1:30647200-30647600
chr1:143540497-143540903	LTR48B_LTR_ERV1,LTR48B_LTR_ERV1	BIN_88	0.962799	chr1:143540800-143541200
chr1:234785281-234785756	MLT2B3_LTR_ERVL	BIN_174	0.812156	chr1:234785200-234785600
chr2:141469561-141469738	LTR16A2_LTR_ERVL	BIN_646	0.812156	chr2:141469600-141470000
chr3:23235596-23235879	LTR88c_LTR_Gypsy?	BIN_820	0.900464	chr3:23235200-23235600
chr3:67508242-67508710	MLT1H_LTR_ERVL-MaLR	BIN_838	0.797112	chr3:67508000-67508400
chr3:78334199-78334564	MLT1A1_LTR_ERVL-MaLR	BIN_846	0.82848	chr3:78334400-78334800
chr3:81595530-81596776	MER41A_LTR_ERV1,MER41-int_LTR_ERV1,MER41-int_LTR_ERV1	BIN_847	0.862782	chr3:81595200-81595600
chr4:19924369-19925752	MER65-int_LTR_ERV1,MER57A1_LTR_ERV1,MER65-int_LTR_ERV1	BIN_902	0.999999	chr4:19924000-19924400
chr4:23761491-23764885	THE1B_LTR_ERVL-MaLR,THE1B-int_LTR_ERVL-MaLR,HERVL-int_LTR_ERVL,MLT2A2_LTR_ERVL	BIN_904	0.797112	chr4:23761200-23761600
chr4:52695950-52696174	MLT1K_LTR_ERVL-MaLR	BIN_922	0.82848	chr4:52696000-52696400
chr4:120738777-120739749	ERVL-E-int_LTR_ERVL	BIN_865	0.826659	chr4:120739600-120740000
chr5:9924182-9924727	MLT2B4_LTR_ERVL	BIN_1023	0.877693	chr5:9924000-9924400
chr5:76238711-76238834	MLT1G_LTR_ERVL-MaLR	BIN_1011	0.847996	chr5:76238400-76238800
chr5:103052335-103052834	MLT1K_LTR_ERVL-MaLR	BIN_947	0.911692	chr5:103052800-103053200
chr5:139378494-139378929	LTR16E1_LTR_ERVL,LTR16E1_LTR_ERVL	BIN_970	0.88731	chr5:139378400-139378800
chr5:149293975-149294493	LTR54_LTR_ERV1	BIN_973	0.839219	chr5:149294000-149294400
chr5:174227503-174227990	MLT1F2_LTR_ERVL-MaLR	BIN_980	0.836409	chr5:174227200-174227600
chr6:6932633-6932839	MER4-int_LTR_ERV1,MER4-int_LTR_ERV1,MER4-int_LTR_ERV1	BIN_1104	0.875785	chr6:6932800-6933200
chr6:15873180-15873611	MLT1G1_LTR_ERVL-MaLR	BIN_1051	0.900464	chr6:15873600-15874000
chr6:69836057-69836102	MLT2B3_LTR_ERVL	BIN_1105	0.801644	chr6:69836000-69836400
chr6:78032764-78034279	ERVL-B4-int_LTR_ERVL	BIN_1107	0.847996	chr6:78034000-78034400
chr6:153672846-153674974	MER2_DNA_TcMar-Tigger,HSMAR2_DNA_TcMar-Mariner,MER61A_LTR_ERV1,MER61-int_LTR_ERV1,MER61-int_LTR_ERV1,MER61-int_LTR_ERV1	BIN_1050	0.82848	chr6:153674800-153675200
chr7:10580351-10582040	MLT1I_LTR_ERVL-MaLR,L4_LINE_RTE	BIN_1124	0.88731	chr7:10582000-10582400
chr7:12353826-12354457	MER39_LTR_ERV1	BIN_1135	0.812156	chr7:12354000-12354400
chr7:12629147-12633080	HERVFH21-int_LTR_ERV1,HERVFH21-int_LTR_ERV1	BIN_1137	0.875785	chr7:12632000-12632400
chr7:103218099-103218354	LTR84b_LTR_ERVL	BIN_1121	0.867301	chr7:103218000-103218400
chr7:121854874-121856575	MLT2F_LTR_ERVL,L2_LINE_L2,MSTA_LTR_ERVL-MaLR,L2_LINE_L2	BIN_1131	0.82848	chr7:121856400-121856800
chr8:5609074-5609778	MLT1A0_LTR_ERVL-MaLR,THE1A_LTR_ERVL-MaLR,MLT1A0_LTR_ERVL-MaLR	BIN_1244	0.847996	chr8:5609600-5610000
chr8:29424471-29425023	MLT2B4_LTR_ERVL,MADE2_DNA_TcMar-Mariner	BIN_1226	0.812156	chr8:29424400-29424800
chr8:73898089-73899226	LTR78_LTR_ERV1,MER21C_LTR_ERVL	BIN_1257	0.847996	chr8:73898400-73898800
chr8:106498634-106498842	LTR90A_LTR_LTR	BIN_1195	0.921589	chr8:106498400-106498800
chr8:112455082-112455172	MLT1K_LTR_ERVL-MaLR	BIN_1199	0.972198	chr8:112454800-112455200
chr9:3594057-3594892	ERVL-E-int_LTR_ERVL,ERVL-E-int_LTR_ERVL,THE1D_LTR_ERVL-MaLR,ERVL-E-int_LTR_ERVL	BIN_1291	0.812156	chr9:3594000-3594400
chr9:83315390-83315547	LTR16A2_LTR_ERVL	BIN_1301	0.82848	chr9:83315200-83315600
chr9:85583288-85583685	MLT1C_LTR_ERVL-MaLR	BIN_1303	0.900464	chr9:85583200-85583600
chr10:17388899-17389230	MLT2C1_LTR_ERVL	BIN_17	0.797112	chr10:17388800-17389200
chr10:118348697-118348884	MLT1H_LTR_ERVL-MaLR	BIN_5	0.875785	chr10:118348400-118348800
chr11:1675085-1675309	LTR55_LTR_ERV	BIN_73	0.88731	chr11:1675200-1675600
chr11:13663295-13663465	MLT1L_LTR_ERVL-MaLR	BIN_69	0.812156	chr11:13663200-13663600
chr12:42197952-42198580	MLT1E2_LTR_ERVL-MaLR,MLT2C1_LTR_ERVL	BIN_183	1.01284	chr12:42197600-42198000
chr12:106397845-106398975	L2a_LINE_L2,THE1B_LTR_ERVL-MaLR,L2a_LINE_L2	BIN_143	0.875785	chr12:106398800-106399200
chr13:36253520-36253830	MLT2B1_LTR_ERVL	BIN_251	0.803174	chr13:36253200-36253600
chr13:38881537-38881664	ERV3-16A3_I-int_LTR_ERVL	BIN_256	0.88731	chr13:38881200-38881600
chr14:24049538-24051196	L2b_LINE_L2,LTR12C_LTR_ERV1	BIN_298	0.822695	chr14:24050000-24050400
chr14:43104519-43105295	LTR49-int_LTR_ERV1,MSTB1_LTR_ERVL-MaLR	BIN_311	0.911692	chr14:43104400-43104800
chr15:84829019-84832364	HERVK-int_LTR_ERVK	BIN_367	0.938236	chr15:84831200-84831600
chr16:27898575-27898939	MLT1K_LTR_ERVL-MaLR,L2c_LINE_L2	BIN_386	0.812705	chr16:27898800-27899200
chr18:45343970-45345897	MER65-int_LTR_ERV1,LTR57-int_LTR_ERVL,MER101-int_LTR_ERV1	BIN_510	0.921589	chr18:45345200-45345600
chr18:45674679-45675397	MER31-int_LTR_ERV1	BIN_511	0.862782	chr18:45675200-45675600
chr20:9171842-9172216	MLT1A1_LTR_ERVL-MaLR	BIN_609	1.23523	chr20:9171600-9172000
chr20:17175702-17176151	MER110A_LTR_ERV1	BIN_566	0.826659	chr20:17175600-17176000
chr20:37732390-37732843	MLT1D_LTR_ERVL-MaLR	BIN_584	0.842916	chr20:37732400-37732800
chr20:42799559-42800628	L2c_LINE_L2,LTR16A_LTR_ERVL,L2c_LINE_L2	BIN_591	0.900464	chr20:42800000-42800400
chr22:26456374-26456532	LTR33A__LTR_ERVL	BIN_706	0.941504	chr22:26456400-26456800
chrX:6020335-6020592	MLT1A0_LTR_ERVL-MaLR	BIN_1356	0.826659	chrX:6020400-6020800
chrX:27827073-27828549	LTR12C_LTR_ERV1	BIN_1342	0.894368	chrX:27827600-27828000
chrX:71717572-71717841	MER31-int_LTR_ERV1	BIN_1361	0.797112	chrX:71717600-71718000
chrX:123288793-123294143	MER34C__LTR_ERV1,HERV35I-int_LTR_ERV1,MER83B-int_LTR_ERV1,HERV35I-int_LTR_ERV1,MLT2A1_LTR_ERVL,HERVL-int_LTR_ERVL	BIN_1319	0.862782	chrX:123289600-123290000
chrX:135529981-135532863	L2c_LINE_L2,THE1B_LTR_ERVL-MaLR,L2c_LINE_L2,L2_LINE_L2	BIN_1326	0.812156	chrX:135531600-135532000
chr1:15700424-15700494	MER3_DNA_hAT-Charlie	BIN_97	0.82848	chr1:15700400-15700800
chr1:80278728-80278904	L2_LINE_L2	BIN_489	0.82848	chr1:80278800-80279200
chr1:83149743-83150185	L2_LINE_L2,L2b_LINE_L2	BIN_501	0.982778	chr1:83150000-83150400
chr1:197665894-197666180	L2c_LINE_L2	BIN_133	0.812156	chr1:197666000-197666400
chr1:200579717-200580079	L2c_LINE_L2	BIN_135	0.847996	chr1:200580000-200580400
chr1:200622110-200623164	L2b_LINE_L2,L2b_LINE_L2	BIN_136	0.812156	chr1:200622800-200623200
chr1:214633988-214634068	L2b_LINE_L2	BIN_154	0.855774	chr1:214633600-214634000
chr1:240535573-240535742	MER117_DNA_hAT-Charlie	BIN_181	0.951694	chr1:240535600-240536000
chr2:14218511-14218608	L2c_LINE_L2	BIN_650	0.921589	chr2:14218400-14218800
chr2:60173480-60173651	MER58A_DNA_hAT-Charlie	BIN_742	0.842916	chr2:60173600-60174000
chr2:69826465-69826616	Tigger14a_DNA_TcMar-Tigger	BIN_745	0.929632	chr2:69826400-69826800
chr2:102146088-102146144	MER2_DNA_TcMar-Tigger	BIN_611	0.843799	chr2:102146000-102146400
chr2:125482288-125482773	L4_LINE_RTE	BIN_630	0.82848	chr2:125482000-125482400
chr2:142005795-142006236	L2a_LINE_L2	BIN_647	0.875785	chr2:142006000-142006400
chr2:175861381-175861821	L2a_LINE_L2	BIN_668	0.921589	chr2:175861600-175862000
chr2:213560244-213560581	Tigger3a_DNA_TcMar-Tigger	BIN_692	0.842916	chr2:213560000-213560400
chr3:41399730-41401247	L2a_LINE_L2	BIN_828	0.797112	chr3:41400000-41400400
chr3:112190793-112191245	MER112_DNA_hAT-Charlie,MER20_DNA_hAT-Charlie,MER112_DNA_hAT-Charlie,MER112_DNA_hAT-Charlie	BIN_767	0.847996	chr3:112190800-112191200
chr3:146121102-146121290	MER5A_DNA_hAT-Charlie	BIN_786	0.842916	chr3:146120800-146121200
chr3:146703875-146703980	L2_LINE_L2	BIN_787	0.812156	chr3:146703600-146704000
chr3:192367904-192368499	L2c_LINE_L2	BIN_810	0.842916	chr3:192368000-192368400
chr4:23522531-23522745	MER8_DNA_TcMar-Tigger	BIN_903	0.822695	chr4:23522400-23522800
chr4:32998139-32999950	L2_LINE_L2	BIN_909	0.812156	chr4:32999600-33000000
chr4:41509938-41510280	L2b_LINE_L2	BIN_913	0.797112	chr4:41510000-41510400
chr4:75390280-75390477	L2c_LINE_L2,Charlie4z_DNA_hAT-Charlie	BIN_936	0.862782	chr4:75390000-75390400
chr4:92163200-92163478	L2b_LINE_L2	BIN_941	0.847996	chr4:92163200-92163600
chr4:142113911-142114422	L2a_LINE_L2	BIN_876	0.847996	chr4:142114000-142114400
chr4:173776393-173776660	MER113A_DNA_hAT-Charlie	BIN_894	0.812156	chr4:173776400-173776800
chr5:27465079-27466349	HSMAR1_DNA_TcMar-Mariner	BIN_994	0.797112	chr5:27466000-27466400
chr5:40609999-40610272	L2c_LINE_L2	BIN_1000	0.897594	chr5:40610000-40610400
chr5:91923380-91923647	L4_LINE_RTE	BIN_1017	0.82848	chr5:91923600-91924000
chr5:118511226-118511469	L2b_LINE_L2	BIN_1381	0.812156	chr5:118511200-118511600
chr6:116891047-116891150	L2_LINE_L2	BIN_1028	0.862782	chr6:116890800-116891200
chr6:123979547-123980666	L2c_LINE_L2	BIN_1030	0.847996	chr6:123980400-123980800
chr6:145963559-145964317	L2a_LINE_L2	BIN_1043	0.862782	chr6:145964000-145964400
chr7:51692461-51692701	MER2_DNA_TcMar-Tigger	BIN_1162	0.875785	chr7:51692400-51692800
chr7:78221602-78221771	MER58A_DNA_hAT-Charlie,MER58A_DNA_hAT-Charlie	BIN_1178	0.862782	chr7:78221600-78222000
chr7:95348810-95349013	MER112_DNA_hAT-Charlie	BIN_1190	0.862782	chr7:95348800-95349200
chr7:103635653-103635980	L2a_LINE_L2	BIN_1122	0.921589	chr7:103635600-103636000
chr7:109146457-109147047	Tigger13a_DNA_TcMar-Tigger	BIN_1126	0.812156	chr7:109146800-109147200
chr8:2589682-2589735	L2a_LINE_L2	BIN_1225	0.826659	chr8:2589600-2590000
chr8:36029828-36030010	L2c_LINE_L2,L2b_LINE_L2	BIN_1235	0.847996	chr8:36029600-36030000
chr8:59067656-59067974	L2a_LINE_L2	BIN_1246	0.862782	chr8:59067600-59068000
chr8:61376870-61376945	MER5B_DNA_hAT-Charlie	BIN_1250	0.862782	chr8:61376800-61377200
chr8:74124946-74125035	L2c_LINE_L2	BIN_1258	1.0492	chr8:74124800-74125200
chr8:89426178-89427271	L2a_LINE_L2,MER58B_DNA_hAT-Charlie,L2a_LINE_L2	BIN_1265	0.855774	chr8:89426800-89427200
chr8:110713949-110714275	L2c_LINE_L2	BIN_1197	0.812156	chr8:110714000-110714400
chr9:108091942-108092384	L2c_LINE_L2	BIN_1275	0.958998	chr9:108092000-108092400
chr10:22282232-22282373	Charlie17a_DNA_hAT-Charlie,Charlie17a_DNA_hAT-Charlie	BIN_19	1.0048	chr10:22282000-22282400
chr10:92295124-92295325	L2a_LINE_L2	BIN_46	0.799691	chr10:92295200-92295600
chr11:21598724-21598775	L2a_LINE_L2	BIN_75	0.812705	chr11:21598400-21598800
chr11:26920379-26920415	MER5A1_DNA_hAT-Charlie	BIN_80	0.900464	chr11:26920000-26920400
chr11:62759322-62759802	L2c_LINE_L2	BIN_106	0.847996	chr11:62759200-62759600
chr11:104682194-104682470	Tigger5_DNA_TcMar-Tigger	BIN_57	0.847996	chr11:104682400-104682800
chr12:16448573-16449128	MADE1_DNA_TcMar-Mariner,L2a_LINE_L2,MER81_DNA_hAT-Blackjack,L2a_LINE_L2,L2a_LINE_L2	BIN_157	0.847996	chr12:16448800-16449200
chr12:49877517-49877666	MER5A1_DNA_hAT-Charlie	BIN_192	0.847996	chr12:49877200-49877600
chr12:63631592-63632061	L2_LINE_L2	BIN_199	0.859901	chr12:63631200-63631600
chr12:81142755-81142817	MER102c_DNA_hAT-Charlie	BIN_215	0.812156	chr12:81142800-81143200
chr13:25366996-25367115	L3_LINE_CR1	BIN_242	0.862782	chr13:25366800-25367200
chr13:83102539-83102671	L2a_LINE_L2	BIN_278	1.09226	chr13:83102400-83102800
chr13:94572239-94573171	L2_LINE_L2	BIN_285	0.862782	chr13:94572400-94572800
chr14:35232769-35233137	Tigger1_DNA_TcMar-Tigger,Tigger1_DNA_TcMar-Tigger	BIN_308	0.797112	chr14:35232400-35232800
chr14:76268942-76269401	L2c_LINE_L2	BIN_326	0.862782	chr14:76268800-76269200
chr15:24915426-24916118	L2a_LINE_L2	BIN_342	0.897594	chr15:24915600-24916000
chr16:55296583-55296702	L2c_LINE_L2	BIN_418	0.814392	chr16:55296400-55296800
chr16:82064299-82064523	L3_LINE_CR1	BIN_435	0.82848	chr16:82064400-82064800
chr17:13236486-13236803	L2_LINE_L2	BIN_442	0.812705	chr17:13236800-13237200
chr17:47959071-47959169	L2c_LINE_L2	BIN_462	0.812156	chr17:47958800-47959200
chr20:32602830-32602960	L2c_LINE_L2	BIN_581	0.897594	chr20:32602800-32603200
chr20:40058108-40058440	L3_LINE_CR1	BIN_587	0.847996	chr20:40058400-40058800
chr21:17143651-17143897	L2a_LINE_L2	BIN_618	0.842916	chr21:17143600-17144000
chr21:20202295-20202589	BLACKJACK_DNA_hAT-Blackjack	BIN_625	0.797112	chr21:20202400-20202800
chr22:46945330-46945532	L2c_LINE_L2	BIN_724	0.842916	chr22:46945200-46945600
chrX:98942909-98943631	Tigger3c_DNA_TcMar-Tigger,Tigger3_DNA_TcMar-Tigger,Tigger3c_DNA_TcMar-Tigger	BIN_1371	0.839219	chrX:98942800-98943200
chrX:106476890-106477284	L2_LINE_L2	BIN_1308	0.797112	chrX:106477200-106477600
chrX:117545850-117546668	L2c_LINE_L2	BIN_1315	0.847996	chrX:117545600-117546000
chr1:104893606-104893632	(TG)n_Simple_repeat_Simple_repeat	BIN_53	0.921589	chr1:104893600-104894000
chr1:158770954-158771004	(TG)n_Simple_repeat_Simple_repeat	BIN_99	0.875785	chr1:158770800-158771200
chr2:7329191-7329700	(TG)n_Simple_repeat_Simple_repeat	BIN_748	0.839219	chr2:7329200-7329600
chr2:23543336-23543369	(GA)n_Simple_repeat_Simple_repeat	BIN_715	0.88731	chr2:23543200-23543600
chr2:43381467-43381855	(CAGA)n_Simple_repeat_Simple_repeat	BIN_735	0.812156	chr2:43381600-43382000
chr2:92267522-92273951	HSATII_Satellite_Satellite	BIN_758	0.876574	chr2:92268800-92269200
chr2:116929484-116929536	(TG)n_Simple_repeat_Simple_repeat	BIN_617	0.900464	chr2:116929200-116929600
chr2:209884359-209884403	AT_rich_Low_complexity_Low_complexity	BIN_690	0.812156	chr2:209884000-209884400
chr2:242803947-242804117	(CA)n_Simple_repeat_Simple_repeat	BIN_722	0.799691	chr2:242804000-242804400
chr3:82513570-82515273	(TA)n_Simple_repeat_Simple_repeat	BIN_848	0.879972	chr3:82514400-82514800
chr3:88727235-88727278	AT_rich_Low_complexity_Low_complexity	BIN_852	0.847996	chr3:88727200-88727600
chr3:145316414-145316456	AT_rich_Low_complexity_Low_complexity	BIN_785	0.812156	chr3:145316400-145316800
chr3:147647791-147647830	(CA)n_Simple_repeat_Simple_repeat	BIN_789	0.826659	chr3:147647600-147648000
chr4:48908-49105	AT_rich_Low_complexity_Low_complexity	BIN_917	1.05237	chr4:48800-49200
chr4:29893667-29893695	(TC)n_Simple_repeat_Simple_repeat	BIN_1380	0.797112	chr4:29893600-29894000
chr4:44135813-44135858	(CA)n_Simple_repeat_Simple_repeat	BIN_914	0.846588	chr4:44135600-44136000
chr4:45190939-45191019	(TCTA)n_Simple_repeat_Simple_repeat	BIN_915	0.82848	chr4:45190800-45191200
chr4:49633314-49641512	(GAATG)n_Satellite_Satellite	BIN_919	0.879009	chr4:49636400-49636800
chr4:49650912-49660115	(GAATG)n_Satellite_Satellite	BIN_920	0.826659	chr4:49654800-49655200
chr4:49650912-49660115	(GAATG)n_Satellite_Satellite	BIN_921	1.08515	chr4:49659200-49659600
chr4:58709129-58709154	AT_rich_Low_complexity_Low_complexity	BIN_926	1.0048	chr4:58708800-58709200
chr4:65027486-65027506	(TTA)n_Simple_repeat_Simple_repeat	BIN_931	0.812156	chr4:65027200-65027600
chr4:80731082-80731291	(TA)n_Simple_repeat_Simple_repeat	BIN_937	0.812705	chr4:80730800-80731200
chr4:181385588-181385636	(CA)n_Simple_repeat_Simple_repeat	BIN_899	0.842916	chr4:181385600-181386000
chr4:188431156-188431262	(CA)n_Simple_repeat_Simple_repeat	BIN_900	0.812156	chr4:188431200-188431600
chr5:23045109-23045132	AT_rich_Low_complexity_Low_complexity	BIN_989	0.812156	chr5:23044800-23045200
chr5:90933018-90933082	AT_rich_Low_complexity_Low_complexity	BIN_1015	0.847996	chr5:90932800-90933200
chr5:180097181-180097215	(TG)n_Simple_repeat_Simple_repeat	BIN_982	0.930378	chr5:180096800-180097200
chr6:142216520-142216576	AT_rich_Low_complexity_Low_complexity	BIN_1035	0.812156	chr6:142216400-142216800
chr7:52235435-52235472	AT_rich_Low_complexity_Low_complexity	BIN_1163	0.836409	chr7:52235200-52235600
chr7:61739760-61747768	(GAGTG)n_Simple_repeat_Simple_repeat	BIN_1165	0.855774	chr7:61742800-61743200
chr7:61783019-61803155	HSATII_Satellite_Satellite	BIN_1166	0.870357	chr7:61798000-61798400
chr7:80742608-80742635	(TG)n_Simple_repeat_Simple_repeat	BIN_1181	0.826659	chr7:80742400-80742800
chr7:148640882-148642271	(TA)n_Simple_repeat_Simple_repeat	BIN_1145	0.952038	chr7:148642000-148642400
chr7:155751277-155752514	(TATAG)n_Simple_repeat_Simple_repeat	BIN_1151	0.862782	chr7:155752400-155752800
chr8:9047715-9047766	C-rich_Low_complexity_Low_complexity	BIN_1266	0.797112	chr8:9047600-9048000
chr8:23609818-23609924	(T)n_Simple_repeat_Simple_repeat	BIN_1223	0.867301	chr8:23609600-23610000
chr8:43092745-43097520	SAR_Satellite_Satellite	BIN_1240	0.889523	chr8:43094000-43094400
chr8:70215883-70215916	(CA)n_Simple_repeat_Simple_repeat	BIN_1253	0.82848	chr8:70215600-70216000
chr9:11938362-11938469	(TAGA)n_Simple_repeat_Simple_repeat	BIN_1277	0.855774	chr9:11938400-11938800
chr9:67315123-67320975	CER_Satellite_Satellite	BIN_1294	1.13236	chr9:67320400-67320800
chr9:84021508-84021619	(CATATA)n_Simple_repeat_Simple_repeat	BIN_1302	0.842916	chr9:84021600-84022000
chr9:107967399-107967571	(TATG)n_Simple_repeat_Simple_repeat	BIN_1274	0.813867	chr9:107967200-107967600
chr10:4664914-4664996	CT-rich_Low_complexity_Low_complexity	BIN_27	0.812156	chr10:4664800-4665200
chr10:55166788-55166811	(TC)n_Simple_repeat_Simple_repeat	BIN_29	0.862782	chr10:55166800-55167200
chr10:64129545-64131149	(TA)n_Simple_repeat_Simple_repeat	BIN_37	0.830953	chr10:64130400-64130800
chr10:126987781-126987802	AT_rich_Low_complexity_Low_complexity	BIN_8	0.900464	chr10:126987600-126988000
chr11:43075531-43075678	GA-rich_Low_complexity_Low_complexity	BIN_87	0.812705	chr11:43075600-43076000
chr11:105249557-105249789	(TA)n_Simple_repeat_Simple_repeat	BIN_59	0.812156	chr11:105249600-105250000
chr12:24770940-24770980	T-rich_Low_complexity_Low_complexity	BIN_164	0.812156	chr12:24770800-24771200
chr12:68998496-68998547	(CATA)n_Simple_repeat_Simple_repeat	BIN_201	0.95109	chr12:68998400-68998800
chr12:80165932-80165954	AT_rich_Low_complexity_Low_complexity	BIN_211	0.82848	chr12:80165600-80166000
chr12:97642709-97642736	(T)n_Simple_repeat_Simple_repeat	BIN_229	0.937595	chr12:97642400-97642800
chr13:52500025-52500309	(TG)n_Simple_repeat_Simple_repeat	BIN_264	0.918836	chr13:52500000-52500400
chr13:57425646-57425693	(CATATA)n_Simple_repeat_Simple_repeat	BIN_266	0.958998	chr13:57425600-57426000
chr13:90815858-90815903	(CA)n_Simple_repeat_Simple_repeat	BIN_283	0.875785	chr13:90815600-90816000
chr14:21196226-21196302	GA-rich_Low_complexity_Low_complexity	BIN_293	0.797112	chr14:21196000-21196400
chr14:27537716-27537892	(TA)n_Simple_repeat_Simple_repeat	BIN_301	0.82848	chr14:27537600-27538000
chr14:84676588-84676628	(TG)n_Simple_repeat_Simple_repeat	BIN_329	0.88731	chr14:84676400-84676800
chr14:98571837-98571867	AT_rich_Low_complexity_Low_complexity	BIN_336	0.825295	chr14:98571600-98572000
chr15:20546804-20549352	(CAGC)n_Simple_repeat_Simple_repeat	BIN_339	0.906829	chr15:20546800-20547200
chr16:33981455-33997390	ALR/Alpha_Satellite_centr	BIN_409	0.911692	chr16:33986800-33987200
chr16:60631997-60632017	(T)n_Simple_repeat_Simple_repeat	BIN_423	0.842916	chr16:60631600-60632000
chr17:14334430-14334813	(TA)n_Simple_repeat_Simple_repeat	BIN_443	0.829724	chr17:14334800-14335200
chr17:22241551-22263006	ALR/Alpha_Satellite_centr	BIN_446	0.976238	chr17:22259200-22259600
chr18:39716326-39716457	T-rich_Low_complexity_Low_complexity	BIN_505	0.88731	chr18:39716400-39716800
chr18:63122713-63122864	(TATAA)n_Simple_repeat_Simple_repeat	BIN_521	0.797112	chr18:63122800-63123200
chr18:76308663-76309018	(CA)n_Simple_repeat_Simple_repeat	BIN_533	0.836409	chr18:76308800-76309200
chr18:76309549-76310171	(CA)n_Simple_repeat_Simple_repeat	BIN_534	0.820849	chr18:76309600-76310000
chr19:350058-351872	(CAA)n_Simple_repeat_Simple_repeat	BIN_545	1.4341	chr19:350400-350800
chr19:350058-351872	(CAA)n_Simple_repeat_Simple_repeat	BIN_546	0.829394	chr19:350800-351200
chr20:26210846-26210950	(CA)n_Simple_repeat_Simple_repeat	BIN_574	0.915168	chr20:26210800-26211200
chr20:26258740-26270390	ALR/Alpha_Satellite_centr	BIN_575	0.82848	chr20:26264800-26265200
chr20:59339117-59339640	(CA)n_Simple_repeat_Simple_repeat	BIN_606	0.862992	chr20:59339200-59339600
chr21:10807036-10810969	(GAATG)n_Satellite_Satellite	BIN_614	0.858817	chr21:10808800-10809200
chr21:16760417-16760819	(ATATG)n_Simple_repeat_Simple_repeat	BIN_616	0.93628	chr21:16760400-16760800
chr21:18343184-18344075	(TATAA)n_Simple_repeat_Simple_repeat	BIN_621	0.972073	chr21:18343200-18343600
chr21:30288588-30288675	A-rich_Low_complexity_Low_complexity	BIN_638	0.862782	chr21:30288400-30288800
chrX:3169691-3170242	(TATATG)n_Simple_repeat_Simple_repeat	BIN_1344	1.01624	chrX:3169600-3170000
chrX:105599512-105599665	(TG)n_Simple_repeat_Simple_repeat	BIN_1307	0.864575	chrX:105599200-105599600
chrX:124410732-124414595	(TA)n_Simple_repeat_Simple_repeat	BIN_1320	1.13408	chrX:124414000-124414400
chrX:127369637-127369685	AT_rich_Low_complexity_Low_complexity	BIN_1323	0.799691	chrX:127369600-127370000
chrY:13453618-13457191	(CATTC)n_Satellite_Satellite	BIN_1373	0.911692	chrY:13454000-13454400
chr1:153643726-153643797	chr1_32_tRNAMet_CAT+	BIN_94	1.55457	chr1:153643600-153644000
chr2:27273650-27273738	chr2_2_tRNATyr_GTA_I+	BIN_729	1.86457	chr2:27274000-27274400
chr3:45730491-45730563	chr3_11_tRNAArg_ACG-	BIN_832	1.32007	chr3:45730400-45730800
chr6:26311424-26311495	chr6_174_tRNAGln_TTG-	BIN_1060	1.01284	chr6:26311600-26312000
chr6:26323046-26323118	chr6_4_tRNAArg_TCG+	BIN_1061	2.30219	chr6:26322800-26323200
chr6:26328368-26328440	chr6_6_tRNAArg_ACG+	BIN_1062	0.900464	chr6:26328400-26328800
chr6:26330529-26330600	chr6_169_tRNAMet_CAT-	BIN_1063	1.35327	chr6:26330400-26330800
chr6:26331672-26331743	chr6_168_tRNATrp_CCA-	BIN_1064	0.81311	chr6:26331600-26332000
chr6:26553731-26553802	chr6_10_tRNAAla_CGC+	BIN_1065	1.65157	chr6:26553600-26554000
chr6:26572092-26572164	chr6_166_tRNAAla_AGC-	BIN_1066	0.862782	chr6:26572000-26572400
chr6:27130050-27130123	chr6_34_tRNAThr_AGT+	BIN_1067	1.0473	chr6:27130000-27130400
chr6:27144994-27145067	chr6_158_tRNAIle_AAT-	BIN_1068	2.21125	chr6:27144800-27145200
chr6:27261671-27261744	chr6_41_Pseudo_ACT+	BIN_1069	1.13408	chr6:27261600-27262000
chr6:27655967-27656040	chr6_59_tRNAIle_AAT+	BIN_1070	2.44774	chr6:27656000-27656400
chr6:27763640-27763711	chr6_130_tRNAGln_TTG-	BIN_1071	0.839219	chr6:27763600-27764000
chr6:28510891-28510963	chr6_124_tRNAArg_TCG-	BIN_1072	2.63733	chr6:28510800-28511200
chr6:28611222-28611293	chr6_66_tRNAAla_TGC+	BIN_1073	0.930378	chr6:28611200-28611600
chr6:28626014-28626085	chr6_120_tRNAAla_AGC-	BIN_1074	0.862782	chr6:28625600-28626000
chr6:28626014-28626085	chr6_120_tRNAAla_AGC-	BIN_1075	0.875785	chr6:28626000-28626400
chr6:28641613-28641684	chr6_119_tRNAAla_CGC-	BIN_1076	1.05087	chr6:28641600-28642000
chr6:28758499-28758571	chr6_109_tRNAPhe_GAA-	BIN_1077	1.6012	chr6:28758400-28758800
chr6:28775610-28775682	chr6_106_tRNAPhe_GAA-	BIN_1078	0.906829	chr6:28775200-28775600
chr6:28775610-28775682	chr6_106_tRNAPhe_GAA-	BIN_1079	3.58977	chr6:28775600-28776000
chr6:28849165-28849237	chr6_73_tRNAArg_CCG+	BIN_1080	0.911692	chr6:28848800-28849200
chr6:28949449-28949521	chr6_96_tRNAPhe_GAA-	BIN_1081	4.28401	chr6:28949200-28949600
chr6:52860417-52860749	7SK_RNA	BIN_1093	1.09084	chr6:52860000-52860400
chr6:52860417-52860749	7SK_RNA	BIN_1094	2.65157	chr6:52860400-52860800
chr6:144537684-144537766	chr6_83_tRNALeu_TAA+	BIN_1040	1.09084	chr6:144537600-144538000
chr7:148680846-148680947	hY3_RNA	BIN_1146	1.09024	chr7:148680800-148681200
chr11:59324970-59325042	chr11_15_tRNAPhe_GAA-	BIN_100	1.20047	chr11:59324800-59325200
chr11:59333853-59333925	chr11_13_tRNAPhe_GAA-	BIN_101	0.911692	chr11:59333600-59334000
chr12:98898030-98898101	chr12_6_tRNATrp_CCA+	BIN_232	0.9575	chr12:98898000-98898400
chr12:125406301-125406372	chr12_13_tRNAAla_TGC-	BIN_149	1.89568	chr12:125406000-125406400
chr12:125411891-125411962	chr12_12_tRNAAsp_GTC-	BIN_150	1.23761	chr12:125412000-125412400
chr12:125412389-125412461	chr12_11_tRNAPhe_GAA-	BIN_151	2.78484	chr12:125412400-125412800
chr13:95201904-95201976	chr13_1_tRNAPhe_GAA-	BIN_287	3.31768	chr13:95201600-95202000
chr13:95201904-95201976	chr13_1_tRNAPhe_GAA-	BIN_288	3.35071	chr13:95202000-95202400
chr14:23398910-23398982	chr14_7_tRNAArg_ACG+	BIN_296	1.41344	chr14:23398800-23399200
chr14:50053297-50053596	RN7SL1	BIN_316	2.09311	chr14:50053200-50053600
chr14:50329268-50329567	RN7SL2	BIN_317	1.32673	chr14:50329200-50329600
chr16:14379750-14379821	chr16_15_tRNAThr_CGT+	BIN_373	0.967654	chr16:14379600-14380000
chr17:8124187-8124258	chr17_39_tRNATrp_CCA-	BIN_484	0.999999	chr17:8124000-8124400
chr17:8124866-8124937	chr17_10_tRNAGly_TCC+	BIN_485	0.856044	chr17:8124800-8125200
chr19:1383361-1383433	chr19_14_tRNAPhe_GAA-	BIN_535	3.87578	chr19:1383200-1383600
chr19:33667963-33668036	chr19_4_tRNAThr_AGT+	BIN_543	0.938236	chr19:33668000-33668400
chr1:564878-564950	tRNA-Gln-CAA_|tRNA_like|-	BIN_357	0.921589	chr1:564800-565200
chr1:97993994-97994057	tRNA-Gln-CAG|tRNA_like|+	BIN_559	0.88731	chr1:97993200-97993600
chr6:58159663-58159737	tRNA-Met|tRNA_like|-	BIN_1099	0.847996	chr6:58159200-58159600
chr8:112620318-112620369	tRNA-Met-i|tRNA_like|+	BIN_1200	0.95109	chr8:112619600-112620000
chr21:26530178-26530216	tRNA-Lys-AAG|tRNA_like|-	BIN_633	0.82848	chr21:26529600-26530000
chr1:28906275-28906405	ACA61(-)	BIN_224	0.900464	chr1:28906800-28907200
chr1:115082684-115082711	U3|snRNA_like|-	BIN_71	0.797112	chr1:115082800-115083200
chr1:174372413-174372492	7SLRNA|srpRNA_like|-	BIN_114	0.906829	chr1:174372000-174372400
chr6:36640670-36640719	HY3|scRNA_like|+	BIN_1087	0.847996	chr6:36640400-36640800
chr14:51104387-51104699	7SLRNA|srpRNA_like|-	BIN_318	0.812705	chr14:51104000-51104400
chr15:86194765-86194859	U6|snRNA_like|-	BIN_368	1.16226	chr15:86194000-86194400
chr21:9827004-9827578	SSU-rRNA_Hsa|rRNA_like|+	BIN_680	0.908241	chr21:9826400-9826800
chrX:108297348-108297830	LSU-rRNA_Hsa|rRNA_like|+	BIN_1309	0.866588	chrX:108297600-108298000
chrX:119723295-119723361	U3|snRNA_like|+	BIN_1318	0.812156	chrX:119723200-119723600
chr12:26904650-26904702	blat|hsa-mir-1268|5'pad=0	BIN_167	0.812156	chr12:26904400-26904800
chr20:20883327-20883429	blat|hsa-mir-1273|5'pad=0	BIN_569	0.842916	chr20:20883200-20883600
chr20:49035354-49035444	blat|hsa-mir-566|5'pad=0	BIN_598	0.88731	chr20:49035200-49035600
chr10:113828800-113829200	OTHER	BIN_4	1.0473	chr10:113828800-113829200
chr10:6711200-6711600	OTHER	BIN_38	0.900464	chr10:6711200-6711600
chr11:38982400-38982800	OTHER	BIN_83	0.812705	chr11:38982400-38982800
chr1:205193200-205193600	OTHER	BIN_138	1.01624	chr1:205193200-205193600
chr12:48639600-48640000	OTHER	BIN_189	0.812156	chr12:48639600-48640000
chr12:83719600-83720000	OTHER	BIN_218	0.911692	chr12:83719600-83720000
chr12:97752400-97752800	OTHER	BIN_230	0.847996	chr12:97752400-97752800
chr13:31369200-31369600	OTHER	BIN_246	0.900464	chr13:31369200-31369600
chr13:46495200-46495600	OTHER	BIN_262	0.847996	chr13:46495200-46495600
chr13:82734000-82734400	OTHER	BIN_277	0.862782	chr13:82734000-82734400
chr13:83538000-83538400	OTHER	BIN_279	0.900464	chr13:83538000-83538400
chr13:87973200-87973600	OTHER	BIN_280	0.862782	chr13:87973200-87973600
chr14:27704800-27705200	OTHER	BIN_302	0.862782	chr14:27704800-27705200
chr14:42833200-42833600	OTHER	BIN_310	0.847996	chr14:42833200-42833600
chr1:55370400-55370800	OTHER	BIN_352	0.812156	chr1:55370400-55370800
chr1:62001200-62001600	OTHER	BIN_377	0.862782	chr1:62001200-62001600
chr16:60460800-60461200	OTHER	BIN_422	0.812156	chr16:60460800-60461200
chr17:68834000-68834400	OTHER	BIN_476	0.847996	chr17:68834000-68834400
chr18:25221200-25221600	OTHER	BIN_498	0.842916	chr18:25221200-25221600
chr18:68388400-68388800	OTHER	BIN_527	1.01284	chr18:68388400-68388800
chr20:31612400-31612800	OTHER	BIN_578	0.82848	chr20:31612400-31612800
chr20:9820800-9821200	OTHER	BIN_610	0.812156	chr20:9820800-9821200
chr21:24943600-24944000	OTHER	BIN_629	0.862782	chr21:24943600-24944000
chr2:132130800-132131200	OTHER	BIN_641	0.799691	chr2:132130800-132131200
chr2:183414400-183414800	OTHER	BIN_675	0.938236	chr2:183414400-183414800
chr2:199562800-199563200	OTHER	BIN_682	0.862782	chr2:199562800-199563200
chr22:27561200-27561600	OTHER	BIN_708	0.862782	chr22:27561200-27561600
chr2:34828400-34828800	OTHER	BIN_733	0.826659	chr2:34828400-34828800
chr3:144148000-144148400	OTHER	BIN_783	0.915168	chr3:144148000-144148400
chr3:176656000-176656400	OTHER	BIN_805	0.95109	chr3:176656000-176656400
chr3:96182800-96183200	OTHER	BIN_853	0.862782	chr3:96182800-96183200
chr4:109383200-109383600	OTHER	BIN_860	0.82848	chr4:109383200-109383600
chr4:155128400-155128800	OTHER	BIN_883	0.930378	chr4:155128400-155128800
chr4:158374000-158374400	OTHER	BIN_887	0.862782	chr4:158374000-158374400
chr4:34858400-34858800	OTHER	BIN_910	0.847996	chr4:34858400-34858800
chr4:59002400-59002800	OTHER	BIN_927	0.847996	chr4:59002400-59002800
chr4:82444000-82444400	OTHER	BIN_938	0.95109	chr4:82444000-82444400
chr5:124833600-124834000	OTHER	BIN_955	0.855774	chr5:124833600-124834000
chr5:129780000-129780400	OTHER	BIN_961	0.862782	chr5:129780000-129780400
chr5:19374800-19375200	OTHER	BIN_984	0.862782	chr5:19374800-19375200
chr5:26335200-26335600	OTHER	BIN_992	0.797112	chr5:26335200-26335600
chr5:28944800-28945200	OTHER	BIN_995	0.812156	chr5:28944800-28945200
chr6:18934800-18935200	OTHER	BIN_1054	0.95109	chr6:18934800-18935200
chr7:12511600-12512000	OTHER	BIN_1136	0.922735	chr7:12511600-12512000
chr7:79618400-79618800	OTHER	BIN_1179	0.81311	chr7:79618400-79618800
chr7:79973600-79974000	OTHER	BIN_1180	0.862782	chr7:79973600-79974000
chr8:107836000-107836400	OTHER	BIN_1196	0.847996	chr8:107836000-107836400
chr8:17890800-17891200	OTHER	BIN_1221	0.872561	chr8:17890800-17891200
chr8:54066000-54066400	OTHER	BIN_1242	0.847996	chr8:54066000-54066400
chr8:57771200-57771600	OTHER	BIN_1245	0.862782	chr8:57771200-57771600
chr9:24216800-24217200	OTHER	BIN_1284	0.797112	chr9:24216800-24217200
chr9:27721200-27721600	OTHER	BIN_1285	0.812156	chr9:27721200-27721600
chr9:68420400-68420800	OTHER	BIN_1295	0.922351	chr9:68420400-68420800
chr9:85691200-85691600	OTHER	BIN_1304	0.847996	chr9:85691200-85691600
chrX:118498400-118498800	OTHER	BIN_1316	0.797112	chrX:118498400-118498800
chrX:137326400-137326800	OTHER	BIN_1327	0.847996	chrX:137326400-137326800
chrX:143593600-143594000	OTHER	BIN_1330	0.847996	chrX:143593600-143594000
chrX:5152400-5152800	OTHER	BIN_1353	1.0048	chrX:5152400-5152800
GENERAL SURVEY
peaks in RefSeq_NR_genes = 6 (Features = 6)
peaks in ensembl = 118 (Features = 101)
peaks in RefSeq = 1 (Features = 1)
peaks in miRNA_from_blat = 3 (Features = 3)
peaks in Alus = 487 (Features = 487)
peaks in mitochondrial_tRNAs = 1 (Features = 1)
peaks in MIR = 49 (Features = 48)
peaks in L1_repeats = 381 (Features = 381)
peaks in Pol III = 45 (Features = 41)
peaks in tRNA_from_blat = 5 (Features = 5)
peaks in RNA = 1 (Features = 1)
peaks in RNA_only_from_blat = 8 (Features = 8)
peaks in LTR_repeats = 62 (Features = 62)
peaks in Other_repeats = 76 (Features = 76)
peaks in Sticky_regions = 83 (Features = 81)
peaks unclassified = 58
Total peaks : 1384
