# Supplementary material for: Human MAF1 targets and represses active RNA polymerase III genes by preventing recruitment rather than inducing long-term transcriptional arrest
Source: HighWire-hosted journal article supplement (doi:10.1101/gr.201400.115), 2016-03-03
Supplement: Supp_Table_S4.xlsx [file Supp_Table_S4.xlsx]

## Sheet: Primers and Probes
Supplemental Table S4. List of PCR primers, probes and siRNAs.
	ChIP-qPCR primers			Northern probes
	Primer name	Sequence		Probe name	Sequence
	ctrl_for	TTTAAGCATTACAGCCAACGCCCG		RN7SL1	CTCCTTAGGCAACCTGGTGGTC
	ctrl_rev	TCTGTGTTCAACTGCCTCCTCCAA		RNY3	GTCAAGTGAAGCAGTGGGAGTGGAG
	TRI-TAT2-1_for	GCTCCAGTGGCGCAATCG		tRNA_Leu	CTTAGACCACTCGGCCATCCT
	TRI-TAT2-1_rev	TTGCTCTGCATGTACTGCTG		tRNA_Pro	GGCTCGTCCGGGATTTGAAC
	RNU6 (PSE)_for	TGGACTATCATATGCTTACCG		tRNA_Val	GTGTGAGGCGAACGTGATAACCA
	RNU6 (PSE)_rev	GGCCATGCTAATCTTCTCTG		TRL-CAA4-1 (mature)	CTTAGACCACTCGGCCATCCT
				TRL-CAA4-1 (precursor)	AGCCCGCAGGCAAGGTGCTTAC
	PCR and RT-PCR primers			TRQ-CTG1-3 (mature)	CAGAGTGCTGACCATTACACCA
	Primer name	Sequence		TRQ-CTG1-3 (precursor)	GCATGATTGCCTTTATATCACAG
	1	GCTACGGTTACAACGGCCTG		TRR-TCT2-1 (mature)	TATCCATTGCGCCACAGAGCC
	2	GCCCTCTAGACTCGAGTT		TRR-TCT2-1 (precursor)	GAATTGCTCTATTCGTCACTA
	3	TAGCTGGGTGGTGAATGCAG		TRY-GTA2-1 (mature)	CTACCAACTGAGCTATCGAAG
	4	TCAAGCAGGGGATACTTGCC		TRY-GTA2-1 (precursor)	TTGCCACGCCCTATCCACTAC
	5	CCCGACAACCACTACCTGAG		TRY-GTA3-1 (mature)	CAGTCCTCCGCTCTACCAACTGA
	6	CAGGCCGTTGTAACCGTAGC		TRY-GTA3-1 (precursor)	GATACCTTGCTTAATGAGCCTAC
	RNA5-8S_for	GGTGGATCACTCGGCTCGT		TRY-GTA8-1 (mature)	GTCCTCCGCTCTACCAACTG
	RNA5-8S_rev	GCAAGTGCGTTCGAAGTGTC		TRY-GTA8-1 (precursor)	GCCTTAGTTTAATGAACCTAC
	Chr21i1_for	CAATTCAGGTCAGGTGATAACTCAGTAA
	Chr21i1_rev	GCCAGGTTTAGAATGTTTGTCTAAGTC
	TRF-GAA1-6_for	GCGCTAAAACTTCTGCCGA
	TRF-GAA1-6_rev	CGGCGAGAGCGACTCTGC
	TRL-TAA1-1_for	AAACAAGGTTCAACGTCTGCA
	TRL-TAA1-1_rev	CGAACCCACGCGGACATAT
	TRN-GTT20-1_for	GTTAGTGCCTTCGGCTGTTT
	TRN-GTT20-1_rev	GAAAGCGTGAATCTTGCCTAAG
	TRR-TCG5-1_for	AAACAAGGTTCAACGTCTGCA
	TRR-TCG5-1_rev	CGAACCCACGCGGACATAT

## Sheet: siRNAs
	Silencer select siRNAs
	Name	Sequence (sense)	Sequence (antisense)
	non-target siRNA (Ambion, Cat. 4390843)	PROPRIETARY	PROPRIETARY
	MAF1 #1 siRNA (Ambion, Cat. 4427037, id s38693)	AAGCGAAUCGUCUUCUUUAtt	UAAAGAAGACGAUUCGCUUga
	MAF1 #2 siRNA (Ambion, Cat. 4427037, id s38691)	CAUCUACAGCUAUAACCCAtt	UGGGUUAUAGCUGUAGAUGtc
